# Supplementary material for: Characterization of the Human Oropharyngeal Microbiomes in SARS‐CoV‐2 Infection and Recovery Patients
Source: PubMed Central journal article supplement (PMC8529429; doi:10.1002/advs.202102785), 2021-08-22
Supplement: ADVS-8-2102785-s001.pdf [file ADVS-8-2102785-s001.pdf]

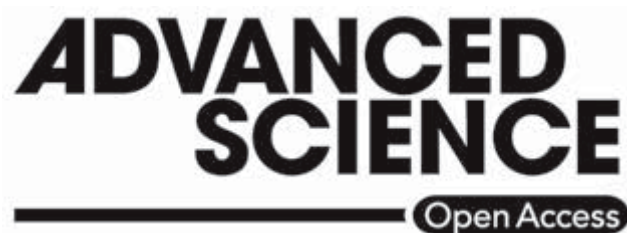

## Supporting Information

for *Adv. Sci.*, DOI: 10.1002/adv.202102785

### Characterization of the human oropharyngeal microbiomes in SARS-CoV-2 infection and recovery patients

*Ming Gao<sup>1,2†</sup>, Haiyu Wang<sup>2,3†</sup>, Hong Luo<sup>4†</sup>, Ying Sun<sup>2,3†</sup>, Ling Wang<sup>5†</sup>, Suying Ding<sup>6</sup>, Hongyan Ren<sup>7</sup>, Jiaqi Gang<sup>8</sup>, Benchen Rao<sup>2,3</sup>, Shanshuo Liu<sup>2,3</sup>, Xuemei Wang<sup>2,3</sup>, Xinxin Gao<sup>6</sup>, Mengyi Li<sup>9</sup>, Yawen Zou<sup>2,3</sup>, Chao Liu<sup>7</sup>, Chengyu Yuan<sup>4</sup>, Jiarui Sun<sup>7</sup>, Guangying Cui<sup>2,3\*</sup>, Zhigang Ren<sup>2,3\*</sup>*

## Supplementary figures

### Characterization of the human oropharyngeal microbiomes in SARS-CoV-2 infection and recovery patients

#### Authors

Ming Gao <sup>1,2†</sup>, Haiyu Wang <sup>2,3†</sup>, Hong Luo <sup>4†</sup>, Ying Sun <sup>2,3†</sup>, Ling Wang <sup>5†</sup>, Suying Ding <sup>6</sup>, Hongyan Ren <sup>7</sup>, Jiaqi Gang <sup>8</sup>, Benchen Rao <sup>2,3</sup>, Shanshuo Liu <sup>2,3</sup>, Xuemei Wang <sup>2,3</sup>, Xinxin Gao <sup>6</sup>, Mengyi Li <sup>9</sup>, Yawen Zou <sup>2,3</sup>, Chao Liu <sup>7</sup>, Chengyu Yuan <sup>4</sup>, Jiarui Sun <sup>7</sup>, Guangying Cui <sup>2,3\*</sup>, Zhigang Ren <sup>2,3\*</sup>

#### Affiliations

<sup>1</sup> Department of Oncology, the First Affiliated Hospital of Zhengzhou University, Zhengzhou 450052, China;

<sup>2</sup> Gene Hospital of Henan Province; Precision Medicine Center, the First Affiliated Hospital of Zhengzhou University, Zhengzhou 450052, China;

<sup>3</sup> Department of Infectious Diseases, the First Affiliated Hospital of Zhengzhou University, Zhengzhou 450052, China;

<sup>4</sup> Guangshan County People's Hospital, Guangshan County, Xinyang 465450, China;

<sup>5</sup> Department of Clinical Laboratory, Henan Provincial Chest Hospital, Zhengzhou 450008, China;

<sup>6</sup> Physical Examination Center, the First Affiliated Hospital of Zhengzhou University,  
Zhengzhou 450052, China;

<sup>7</sup> Shanghai Mobio Biomedical Technology Co., Ltd., Shanghai 201111, China;

<sup>8</sup> Xiuwu County People's Hospital, Xiuwu County, Jiaozuo 454350, China;

<sup>9</sup> Department of Oncology, Zhengzhou First People's Hospital, Zhengzhou 450004,  
China;

†These authors contributed equally to this work.

**\*Address correspondence to:**

Zhigang Ren, Ph.D, M.D., Department of Infectious Diseases, the First Affiliated  
Hospital of Zhengzhou University, #1 Jianshe East Road, Zhengzhou 450052, China.

E-mail: [fccrenzg@zzu.edu.cn](mailto:fccrenzg@zzu.edu.cn)

Guangying Cui, Ph.D, M.D., Department of Infectious Diseases, the First Affiliated  
Hospital of Zhengzhou University, #1 Jianshe East Road, Zhengzhou 450052, China.

E-mail: [fccuigy@zzu.edu.cn](mailto:fccuigy@zzu.edu.cn)

**Fig. S1.**

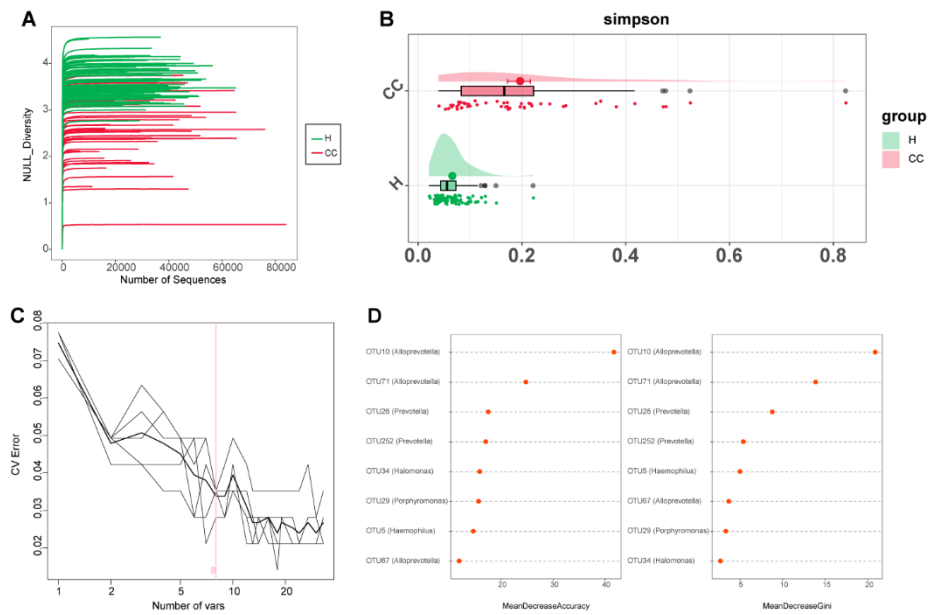

**Fig. S1. The oropharyngeal microbial diversity between CC and H groups.** (A) A shannon-wiener curve between the number of sequences and the null diversity in CC (n=48) and H (n=94) group. As evaluated by Simpson index (B), oropharyngeal microbial diversity was remarkably reduced in CC (n=48) versus H (n=94) ( $p < 0.001$ ). (C) Importance distribution map of the selected microbial markers in the model. (D) Eight microbial markers were selected as the best markers set by random forest model. CCs, confirmed cases; Hs, healthy controls; OTUs, operational taxonomic units; CV Error, the cross-validation error. Center line, median; box limits, upper and lower quartiles; circle symbol, mean; error bars, 95% CI.

**Fig. S2.**

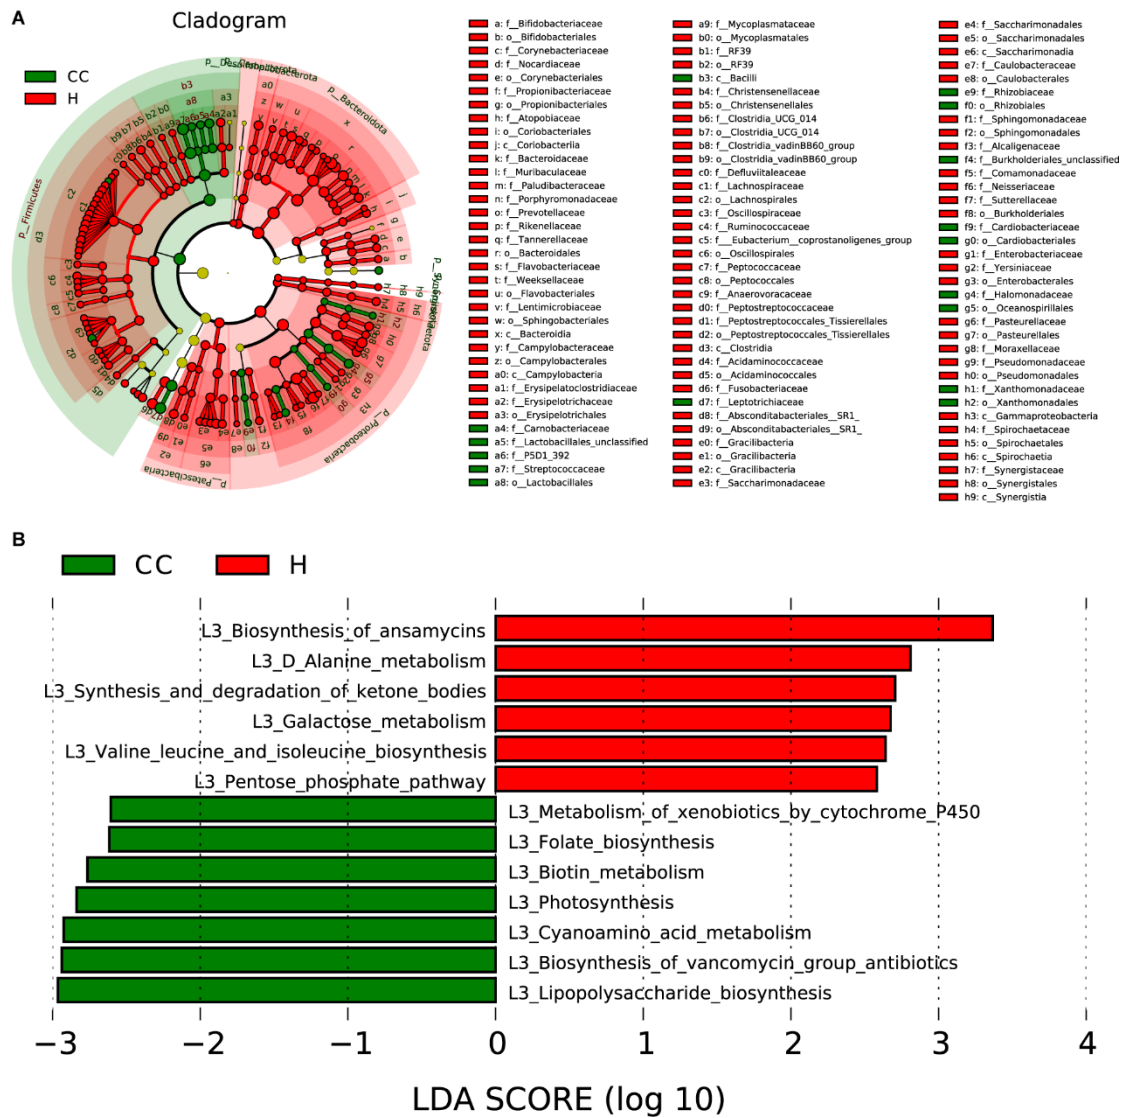

**Fig. S2. LEfSe analysis between Hs and CCs.** (A) The cladogram, representing oropharyngeal microbial structure and their predominant bacteria, revealed the greatest differences in taxa between CCs (n=48) and Hs (n=94). (B) Based on the LDA selection, 6 gene functions were remarkably raised, while 7 gene functions were remarkably reduced in CC versus H ( $p < 0.05$ ,  $LDA > 2.5$ ). CCs, confirmed cases; Hs, healthy controls; LEfSe, linear discriminant analysis (LDA) effect size.

**Fig. S3.**

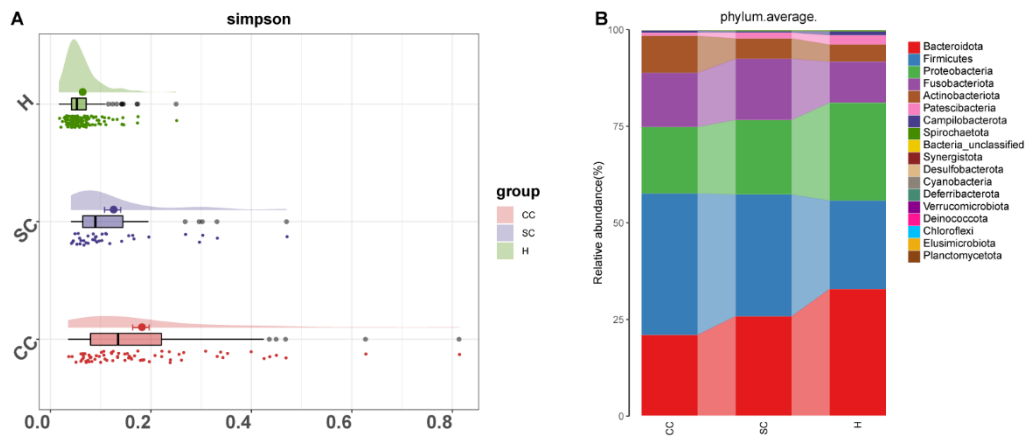

**Fig. S3. The oropharyngeal microbial diversity and abundances among CC, SC, and H groups.** (A) As evaluated by Simpson index, oropharyngeal microbial diversity of CCs (n=73) and SCs (n=36) was remarkably decreased versus that in the H (n=140) ( $p < 0.001$ ). (B) Average compositions and relative abundance of the bacterial community among three groups at the phylum level. CCs, confirmed cases; SCs, suspected cases; Hs, healthy controls. Center line, median; box limits, upper and lower quartiles; circle symbol, mean; error bars, 95% CI.

**Fig. S4.**

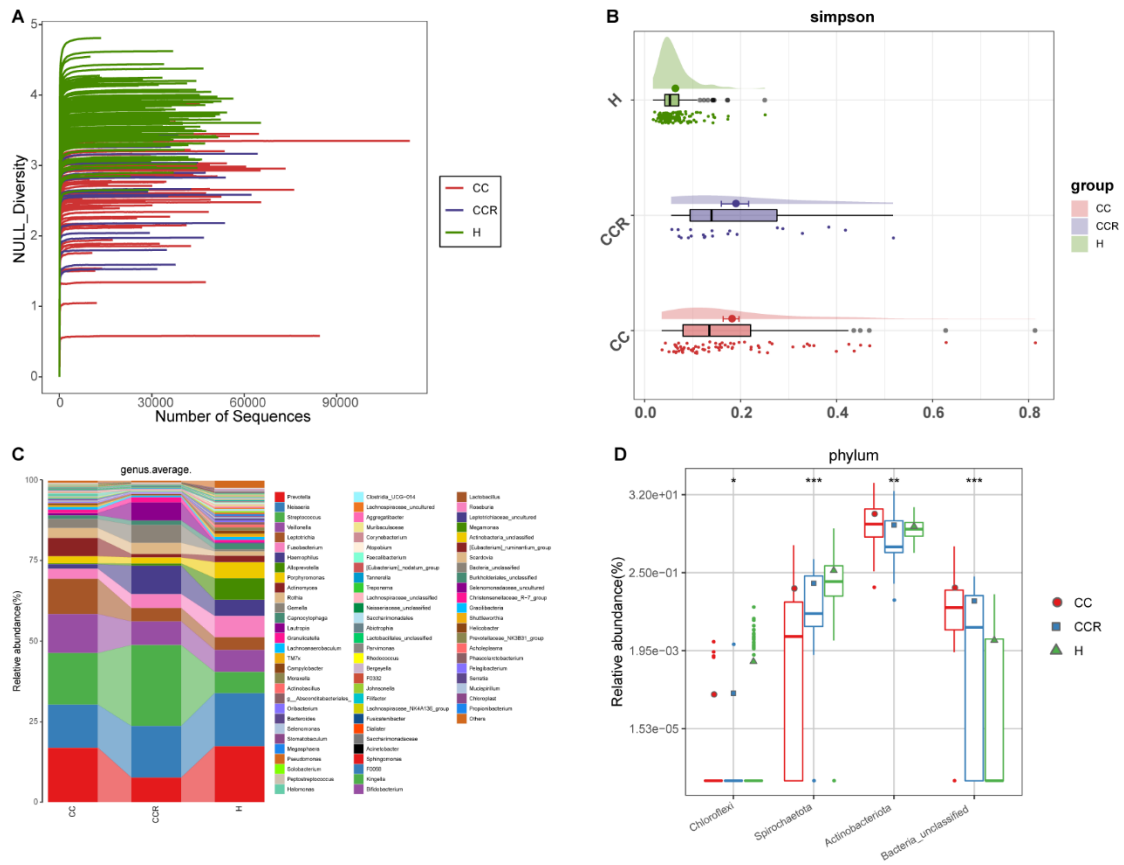

**Fig. S4. The characterization and comparison of oral microbial community among CC, CCR, and H groups.** (A) A shannon-wiener curve between the number of sequences and the null diversity in CC (n=73), CCR (n=21), and H (n=140). As estimated by simpson index (B), oropharyngeal microbial diversity was significantly decreased in CC and CCR groups compared with that in the H group ( $p < 0.001$ ). (C) Average compositions and relative abundance of the bacterial community among three groups at the genus level. (D) phylum of *Chloroflexi*, *Spirochaetota*, *actinobacteriota* were gradually increased among CC, CCR, and H groups ( $p < 0.05$ ). CCs, confirmed cases; CCRs, confirmed cases who recovered; Hs, healthy controls. Center line, median; box limits, upper and lower quartiles; circle symbol, mean; error bars, 95% CI.

**Fig. S5.**

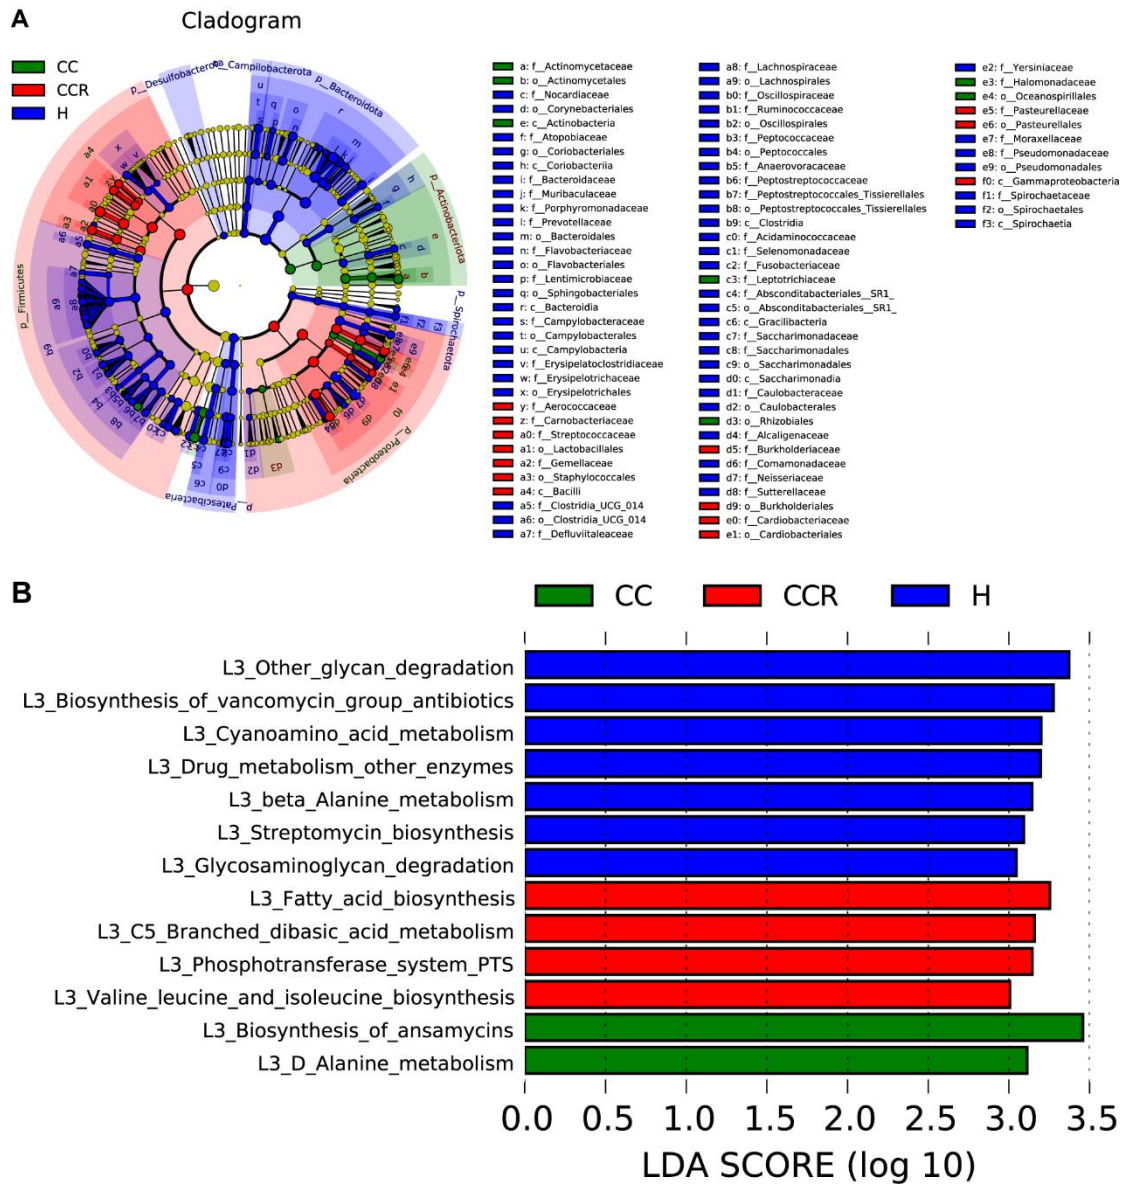

**Fig. S5. LEfSe analysis among CC, CCR, and H groups.** (A) The cladogram, representing oropharyngeal microbial structure and their predominant bacteria, showed the greatest differences in taxa among CC (n=73), CCR (n=21), and H (n=140) groups. (B) Based on the LDA selection, 7 gene functions were remarkably enriched in Hs, 4 gene functions were significantly enriched in CCRs, and 2 gene functions were remarkably enriched in CCs ( $p < 0.05$ ,  $LDA > 3.0$ ). CCs, confirmed cases; CCRs, confirmed cases who recovered; Hs, healthy controls. LEfSe, linear discriminant analysis (LDA) effect size.



### **Supplementary table legend**

**Supplementary table S1.** Clinical data of all confirmed cases (CCs, n=73) and healthy controls (Hs, n=140).

**Supplementary table S2.** The detailed values of oral microbial diversity index and observed OTUs in the discovery cohort (94 healthy controls and 48 CCs).

**Supplementary table S3.** The abundance and composition at the genus and phylum level of each sample in the discovery cohort (94 healthy controls and 48 CCs).

**Supplementary table S4.** The different degree of microbiome at genus and phylum level (p value) between the healthy controls (n=94) and CCs (n=48) in the discovery cohort.

**Supplementary table S5.** The relative abundance and distribution of the key 57 OTUs in the discovery cohort (94 healthy controls and 48 CCs).

**Supplementary table S6.** The cladogram of oropharyngeal microbial structure and their predominant bacteria between CCs and HCs (94 healthy controls and 48 CCs).

**Supplementary table S7.** The corresponding LDA value and p value of microbial community gene function for samples in the discovery cohort (94 healthy controls and 48 CCs).

**Supplementary table S8.** By random forest classifier model, the corresponding output value of each optimal microbial marker in the discovery cohort, and the corresponding POD value for each sample in the discovery cohort (94 healthy controls and 48 CCs).

**Supplementary table S9.** By random forest classifier model, the corresponding output value of each optimal microbial marker in the validation cohort, and the corresponding POD value for each sample in validation cohort (46 healthy controls and 25 CCs).

**Supplementary table S10.** By random forest classifier model, the corresponding output value of each optimal microbial marker, and the corresponding POD value of each sample in the suspected cases (SCs, n=36) and H (n=46) groups.

**Supplementary table S11.** The levels of Ig-G antibody in CC (n=21), SC (n=36), and H (n=6).

**Supplementary table S12.** The detailed values of oral microbial diversity index and observed OTUs among CC (n=73), SC (n=36), and H (n=140) groups.

**Supplementary table S13.** The abundance and composition at the genus level and phylum level of each sample among CC (n=73), SC (n=36), and H (n=140) groups.

**Supplementary table S14.** The relative abundance and distribution of the key 58 OTUs among CC (n=73), SC (n=36), and H (n=140) groups.

**Supplementary table S15.** The average abundance and composition at the genus level among CC (n=73), SC (n=36), CCR (n=21), and SCR (n=36) groups.

**Supplementary table S16.** The detailed values of oral microbial diversity index and observed OTUs among CC (n=73), CCR (n=21), and H (n=140) groups.

**Supplementary table S17.** The abundance and composition at the genus and phylum level of each sample among CC (n=73), CCR (n=21), and H (n=140) groups.

**Supplementary table S18.** The different degree of microbiome at genus and phylum level (p value) among the CC (n=73), CCR (n=21), and H (n=140) groups.

**Supplementary table S19.** The relative abundance and distribution of the key 90 OTUs among the CC (n=73), CCR (n=21), and H (n=140) groups.

**Supplementary table S20.** The cladogram of oropharyngeal microbial structure and their predominant bacteria among the CC (n=73), CCR (n=21), and H (n=140) groups.

**Supplementary table S21.** The corresponding LDA value and p value of microbial community gene function for samples in the discovery cohort (140 healthy controls, 73 CCs, and 21 CCRs).

**Supplementary table S22.** The p value between 44 oropharyngeal OTUs and 11 clinical indicators of CC (n=48) and H (n=94) obtained by spearman correlation analysis.



|      |            |          |   |   |      |     |     |    |       |   |   |   |   |   |   |   |   |   |      |   |   |
|------|------------|----------|---|---|------|-----|-----|----|-------|---|---|---|---|---|---|---|---|---|------|---|---|
| CC10 | Validation | positive | N | 1 | 50   | Han | 173 | 80 | 26.73 | y | n | n | n | n | n | n | n | n | 37.7 | n | n |
| CC11 | Validation | positive | N | 2 | 51   | Han | 160 | 60 | 23.44 | y | n | n | n | n | n | n | n | n | 38.1 | y | n |
| CC13 | Validation | positive | N | 1 | 40   | Han | 170 | 61 | 21.11 | y | n | n | n | n | n | n | n | n | 38.8 | n | n |
| CC15 | Validation | positive | N | 2 | 44   | Han | 162 | 62 | 23.62 | y | n | n | n | n | n | n | n | n | 37.6 | n | n |
| CC18 | Validation | positive | N | 2 | 65   | Han | 155 | 68 | 28.3  | N | n | y | n | y | n | n | n | n | 38.1 | n | n |
| CC19 | Validation | positive | N | 1 | 39   | Han | 178 | 78 | 24.62 | Y | y | y | n | n | n | n | n | y | 36.8 | n | n |
| CC22 | Validation | positive | N | 2 | 50   | Han | 159 | 59 | 23.34 | n | n | y | y | n | n | n | n | n | 38.2 | n | n |
| CC23 | Validation | positive | N | 1 | 36   | Han | 175 | 72 | 23.51 | y | n | n | n | n | n | n | n | n | 38.5 | n | n |
| CC32 | Validation | positive | N | 1 | 53   | Han | 170 | 60 | 20.76 | y | n | n | n | n | n | n | n | n | 38   | y | n |
| CC38 | Validation | positive | N | 1 | 56   | Han | 170 | 85 | 29.41 | y | y | n | n | n | n | n | n | n | 38.3 | n | n |
| CC40 | Validation | positive | N | 1 | 25   | Han | 176 | 68 | 21.95 | y | n | n | n | n | n | n | n | n | 38.0 | y | n |
| CC41 | Validation | positive | N | 2 | 36   | Han | 160 | 53 | 20.7  | n | n | n | n | n | n | n | n | n | 37.2 | n | n |
| CC47 | Validation | positive | N | 2 | 46   | Han | 161 | 54 | 20.83 | y | n | n | n | n | n | n | n | n | 37.4 | y | n |
| CC49 | Validation | positive | N | 1 | 25   | Han | 170 | 65 | 22.49 | n | n | n | n | n | n | n | n | n | 38.0 | n | n |
| CC50 | Validation | positive | N | 1 | 46   | Han | 175 | 80 | 26.12 | y | n | n | n | n | n | n | n | n | 38.5 | n | n |
| CC51 | Validation | positive | N | 2 | 79   | Han | 150 | 65 | 28.89 | n | n | n | n | n | n | n | n | n | 36.9 | n | n |
| CC53 | Validation | positive | N | 1 | 46   | Han | 168 | 76 | 26.93 | y | y | y | n | y | n | n | n | n | 36.6 | y | n |
| CC56 | Validation | positive | N | 1 | 55   | Han | 172 | 70 | 23.66 | y | n | n | n | n | n | n | n | n | 38   | y | n |
| CC59 | Validation | positive | N | 1 | 57   | Han | 175 | 72 | 23.51 | y | n | n | n | n | n | n | n | n | 38.5 | n | n |
| CC61 | Validation | positive | N | 1 | 61   | Han | 164 | 57 | 21.19 | n | y | y | y | n | n | n | n | n | 39   | n | y |
| CC66 | Validation | positive | N | 1 | 75   | Han | 165 | 65 | 23.88 | y | n | n | n | n | n | n | n | n | 36.8 | n | n |
| CC74 | Validation | positive | N | 1 | 40   | Han | 178 | 78 | 32.04 | y | y | y | n | n | n | n | n | y | 38.9 | n | n |
| SC01 | Validation | negative | N | 2 | 49   | Han | 160 | 72 | 28.13 | N | n | n | n | n | n | n | n | n | 37.7 | n | n |
| SC02 | Validation | negative | N | 1 | 24   | Han | 170 | 65 | 22.49 | y | n | n | n | n | n | n | n | n | 37.6 | y | n |
| SC03 | Validation | negative | N | 2 | 49   | Han | 155 | 52 | 21.64 | y | n | y | n | n | n | n | n | y | 38   | n | n |
| SC04 | Validation | negative | N | 2 | 59   | Han | 163 | 65 | 24.46 | N | n | n | n | n | n | n | n | n | 38.2 | y | n |
| SC05 | Validation | negative | N | 2 | 48   | Han | 165 | 62 | 22.77 | N | n | n | n | n | n | n | n | n | 38.1 | y | n |
| SC06 | Validation | negative | N | 1 | 30   | Han | 158 | 71 | 28.44 | y | n | n | n | n | n | n | n | n | 37.6 | y | n |
| SC07 | Validation | negative | N | 1 | 39   | Han | 175 | 80 | 26.12 | y | n | n | n | n | n | n | n | n | 38.6 | n | n |
| SC08 | Validation | negative | N | 1 | 59   | Han | 160 | 65 | 25.39 | y | n | y | y | n | n | n | n | n | 38.1 | n | n |
| SC09 | Validation | negative | N | 2 | 52   | Han | 158 | 60 | 24.03 | y | n | y | y | n | n | n | n | n | 37.9 | n | n |
| SC10 | Validation | negative | N | 1 | 63   | Han | 162 | 69 | 26.29 | y | n | n | n | n | n | n | n | n | 37.7 | n | n |
| SC11 | Validation | negative | N | 1 | 57   | Han | 164 | 68 | 25.28 | y | n | n | n | n | n | n | n | n | 38.3 | n | n |
| SC12 | Validation | negative | N | 1 | 50   | Han | 170 | 77 | 26.64 | y | y | y | n | n | n | n | n | y | 37.9 | n | n |
| SC13 | Validation | negative | N | 2 | 47   | Han | 156 | 54 | 22.19 | y | n | y | y | n | n | n | n | n | 38.1 | y | n |
| SC14 | Validation | negative | N | 1 | 32   | Han | 157 | 69 | 27.99 | y | n | y | n | y | n | n | n | n | 37.8 | y | n |
| SC15 | Validation | negative | N | 2 | 31   | Han | 160 | 62 | 24.22 | y | n | n | n | n | n | n | n | n | 37.5 | n | n |
| SC16 | Validation | negative | N | 2 | 39   | Han | 162 | 64 | 24.39 | y | n | n | n | n | n | n | n | n | 38.2 | n | n |
| SC17 | Validation | negative | N | 1 | 56   | Han | 162 | 74 | 28.2  | y | n | n | n | n | n | n | n | n | 37.6 | y | n |
| SC18 | Validation | negative | N | 2 | 39   | Han | 164 | 70 | 26.03 | N | n | n | n | n | n | n | n | n | 37.7 | n | n |
| SC19 | Validation | negative | N | 2 | 45   | Han | 160 | 70 | 27.34 | y | n | n | n | n | n | n | n | n | 37.6 | n | n |
| SC20 | Validation | negative | N | 1 | 25   | Han | 168 | 70 | 24.8  | N | n | n | n | n | n | n | n | n | 38.7 | n | n |
| SC21 | Validation | negative | N | 1 | 2    | Han | 80  | 11 | 17.19 | y | n | n | n | n | n | n | n | n | 37.9 | n | y |
| SC22 | Validation | negative | N | 1 | 33   | Han | 175 | 65 | 21.22 | y | n | y | n | n | n | n | y | n | 39.2 | n | n |
| SC23 | Validation | negative | N | 2 | 40   | Han | 165 | 55 | 20.2  | y | n | n | n | n | n | n | n | n | 37.5 | n | n |
| SC24 | Validation | negative | N | 2 | 0.83 | Han | 75  | 9  | 16    | y | n | n | n | n | n | n | n | n | 38.1 | n | n |
| SC25 | Validation | negative | N | 1 | 45   | Han | 172 | 65 | 21.97 | y | y | n | n | n | n | n | n | n | 37   | n | n |
| SC26 | Validation | negative | N | 1 | 58   | Han | 169 | 80 | 28.01 | y | y | y | n | n | n | n | n | y | 38.8 | y | n |
| SC27 | Validation | negative | N | 2 | 58   | Han | 160 | 57 | 22.27 | N | n | n | n | n | n | n | n | n | 37.7 | y | n |
| SC28 | Validation | negative | N | 1 | 28   | Han | 198 | 58 | 14.79 | N | n | n | n | n | n | n | n | n | 38   | n | n |
| SC29 | Validation | negative | N | 1 | 26   | Han | 175 | 64 | 20.9  | y | n | n | n | n | n | n | n | n | 37   | n | n |
| SC30 | Validation | negative | N | 2 | 42   | Han | 160 | 65 | 25.39 | N | n | n | n | n | n | n | n | n | 38.2 | n | n |
| SC31 | Validation | negative | N | 1 | 70   | Han | 170 | 70 | 24.22 | N | n | n | n | n | n | n | n | n | 39.2 | y | n |
| SC32 | Validation | negative | N | 1 | 36   | Han | 167 | 75 | 26.89 | y | n | n | n | n | n | n | n | n | 39.3 | y | n |
| SC33 | Validation | negative | N | 1 | 32   | Han | 168 | 60 | 21.26 | y | n | n | n | n | n | n | n | n | 37.6 | n | n |
| SC34 | Validation | negative | N | 2 | 34   | Han | 170 | 61 | 21.11 | N | n | n | n | n | n | n | n | n | 37.9 | n | n |
| SC35 | Validation | negative | N | 2 | 40   | Han | 172 | 66 | 22.31 | y | n | n | n | n | n | n | n | n | 39.3 | y | n |
| SC36 | Validation | negative | N | 1 | 65   | Han | 170 | 77 | 26.64 | Y | y | y | y | n | n | n | n | n | 38.9 | n | n |

| fatigue | cough<br>phlegm | headache | diarrhea | dyspnea | Time<br>from<br>illness<br>to<br>dyspnea<br>(day) | time<br>from<br>illness<br>to<br>admission<br>(day) | Total<br>hospital<br>stay<br>(day) | systolic<br>pressure<br>(mm<br>Hg) | diastolic<br>pressure<br>(mmH<br>g) | heart<br>rate(<br>Time<br>s/min<br>) | respira<br>tory<br>rate<br>(Time<br>s/min<br>) | labora<br>tory<br>testi<br>ng<br>result<br>s | Red<br>blood<br>cell<br>(10 <sup>^</sup><br>^9/L<br>) | White<br>blood<br>cell<br>(10 <sup>^</sup><br>^9/L<br>) | Neutro<br>phil<br>(10 <sup>^</sup><br>^9/L<br>) | Lymph<br>ocyte<br>(10 <sup>^</sup><br>^9/L<br>) | Hemo<br>globi<br>n(g/L<br>) | Platel<br>et<br>(10 <sup>^</sup><br>^9/L<br>) | Proth<br>romb<br>in<br>time<br>(s) | Activ<br>ated<br>partia<br>l<br>throm<br>bopla<br>stin<br>time | D-<br>dime<br>r<br>(mg/<br>L) | Albu<br>min<br>(g/L) | ALT<br>(U/L) | AST<br>(U/L) | Total<br>biliru<br>bin<br>(mmo<br>l/L) |
|---------|-----------------|----------|----------|---------|---------------------------------------------------|-----------------------------------------------------|------------------------------------|------------------------------------|-------------------------------------|--------------------------------------|------------------------------------------------|----------------------------------------------|-------------------------------------------------------|---------------------------------------------------------|-------------------------------------------------|-------------------------------------------------|-----------------------------|-----------------------------------------------|------------------------------------|----------------------------------------------------------------|-------------------------------|----------------------|--------------|--------------|----------------------------------------|
| n       | n               | n        | n        | n       | n                                                 | 7                                                   | 16                                 | 130                                | 84                                  | 94                                   | 24                                             |                                              | 4.51                                                  | 3.21                                                    | 1.51                                            | 1.42                                            | 129                         | 128                                           | 10.8                               | 25.2                                                           | 0.11                          | 37.6                 | 12.5         | 21.8         | 6.6                                    |
| n       | n               | n        | n        | n       | n                                                 | 9                                                   | 17                                 | 120                                | 86                                  | 81                                   | 21                                             |                                              | 5                                                     | 4.51                                                    | 2.25                                            | 1.9                                             | 150                         | 124                                           | 10.6                               | 23.8                                                           | 0.15                          | 43.5                 | 43.9         | 34.2         | 12.6                                   |
| n       | n               | n        | n        | n       | n                                                 | 5                                                   | 17                                 | 125                                | 78                                  | 86                                   | 18                                             |                                              | 4.75                                                  | 3.06                                                    | 1.48                                            | 1.48                                            | 139                         | 291                                           | 14.3                               | 25.2                                                           | 0.03                          | 43.5                 | 9.2          | 15.3         | 14.5                                   |
| n       | n               | n        | n        | n       | n                                                 | 2                                                   | 20                                 | 109                                | 86                                  | 76                                   | 21                                             |                                              | 4.56                                                  | 5.13                                                    | 3.5                                             | 1.35                                            | 138                         | 241                                           | 17.3                               | 31.3                                                           | 0.22                          | 37.4                 | 31.5         | 36.3         | 17.4                                   |
| n       | n               | n        | n        | n       | n                                                 | 5                                                   | 18                                 | 109                                | 76                                  | 78                                   | 15                                             |                                              | 4.56                                                  | 3.13                                                    | 2.08                                            | 0.91                                            | 137                         | 118                                           | 14.2                               | 31.4                                                           | 0.30                          | 42.2                 | 44.6         | 27.5         | 18.4                                   |
| n       | n               | n        | n        | n       | n                                                 | 6                                                   | 14                                 | 106                                | 86                                  | 74                                   | 17                                             |                                              | 5.32                                                  | 3.53                                                    | 2.53                                            | 0.95                                            | 153                         | 136                                           | 13.5                               | 21.5                                                           | 0.07                          | 46.3                 | 30.2         | 21.5         | 34.2                                   |
| n       | n               | n        | n        | n       | n                                                 | 10                                                  | 25                                 | 109                                | 87                                  | 75                                   | 15                                             |                                              | 4.16                                                  | 3.87                                                    | 2.37                                            | 0.99                                            | 132                         | 142                                           | 10.5                               | 29.3                                                           | 0.45                          | 38.3                 | 18.2         | 20.3         | 7.8                                    |
| n       | n               | n        | n        | n       | n                                                 | 9                                                   | 15                                 | 98                                 | 67                                  | 78                                   | 14                                             |                                              | 4.47                                                  | 10.8                                                    | 8.92                                            | 1.51                                            | 136                         | 319                                           | 9.2                                | 23.2                                                           | 0.27                          | 39.5                 | 19.6         | 16.1         | 9.24                                   |
| n       | n               | n        | n        | n       | n                                                 | 4                                                   | 19                                 | 119                                | 78                                  | 96                                   | 19                                             |                                              | 5.59                                                  | 6.07                                                    | 4.42                                            | 1.27                                            | 172                         | 150                                           | 12.6                               | 21.5                                                           | 0.39                          | 47.2                 | 41.2         | 24.3         | 19.3                                   |
| y       | n               | n        | n        | n       | n                                                 | 13                                                  | 12                                 | 160                                | 110                                 | 120                                  | 24                                             |                                              | 4.89                                                  | 8.18                                                    | 6.08                                            | 1.71                                            | 142                         | 410                                           | 9.6                                | 27.8                                                           | 0.16                          | 42.3                 | 111.9        | 33.2         | 12.8                                   |
| n       | n               | n        | n        | n       | n                                                 | 8                                                   | 14                                 | 118                                | 89                                  | 87                                   | 15                                             |                                              | 4.54                                                  | 5.39                                                    | 3.30                                            | 1.78                                            | 126                         | 211                                           | 9.25                               | 28.8                                                           | 0.45                          | 46.5                 | 17.7         | 22.8         | 8.5                                    |
| n       | n               | n        | n        | n       | n                                                 | 5                                                   | 15                                 | 130                                | 93                                  | 87                                   | 19                                             |                                              | 5.98                                                  | 9.69                                                    | 7.85                                            | 1.04                                            | 148                         | 270                                           | 10.9                               | 24.9                                                           | 0.32                          | 60.6                 | 21.5         | 17           | 12.6                                   |
| n       | n               | n        | n        | n       | n                                                 | 11                                                  | 16                                 | 161                                | 102                                 | 90                                   | 20                                             |                                              | 4.94                                                  | 11.8                                                    | 10.25                                           | 1.06                                            | 144                         | 374                                           | 9.2                                | 21.2                                                           | 2.6                           | 38.1                 | 34           | 18           | 26.3                                   |
| n       | n               | y        | n        | n       | n                                                 | 3                                                   | 13                                 | 129                                | 80                                  | 80                                   | 20                                             |                                              | 4.21                                                  | 12.3                                                    | 10.95                                           | 1.03                                            | 124                         | 240                                           | 11                                 | 23.2                                                           | 0.4                           | 62.8                 | 14           | 10           | 46.3                                   |
| n       | n               | n        | n        | n       | n                                                 | 3                                                   | 17                                 | 145                                | 108                                 | 80                                   | 20                                             |                                              | 5.08                                                  | 8.3                                                     | 5.79                                            | 1.94                                            | 160                         | 138                                           | 11.5                               | 24.2                                                           | 0.1                           | 41.4                 | 10           | 20           | 53.8                                   |
| n       | n               | n        | n        | y       | l                                                 | 1                                                   | 18                                 | 130                                | 80                                  | 80                                   | 20                                             |                                              | 3.33                                                  | 5.6                                                     | 3.70                                            | 1.53                                            | 117                         | 150                                           | 13.2                               | 25.2                                                           | 2.1                           | 41.6                 | 16           | 25           | 41.5                                   |
| n       | n               | n        | n        | n       | n                                                 | 3                                                   | 27                                 | 150                                | 89                                  | 90                                   | 20                                             |                                              | 4.14                                                  | 4.3                                                     | 3.00                                            | 0.96                                            | 91                          | 230                                           | 10                                 | 29.4                                                           | 0.06                          | 41.0                 | 39           | 29           | 20.0                                   |
| n       | n               | n        | n        | n       | n                                                 | 20                                                  | 15                                 | 107                                | 70                                  | 80                                   | 20                                             |                                              | 4.22                                                  | 7.1                                                     | 4.51                                            | 2.06                                            | 125                         | 287                                           | n                                  | n                                                              | 0.6                           | 41.9                 | 12           | 15           | 13.1                                   |
| n       | n               | n        | n        | n       | n                                                 | 1                                                   | 16                                 | 118                                | 65                                  | 80                                   | 20                                             |                                              | 3.80                                                  | 5.7                                                     | 3.53                                            | 1.75                                            | 114                         | 210                                           | 11                                 | 23.4                                                           | 0.2                           | 38.4                 | 38           | 31           | 19.8                                   |
| n       | n               | n        | n        | n       | n                                                 | 3                                                   | 21                                 | 153                                | 87                                  | 90                                   | 20                                             |                                              | 5.11                                                  | 6.9                                                     | 6.03                                            | 0.71                                            | 150                         | 116                                           | 11.9                               | 25.3                                                           | 0.6                           | 38.7                 | 56           | 71           | 12.0                                   |
| n       | n               | n        | n        | n       | n                                                 | 1                                                   | 11                                 | 120                                | 80                                  | 84                                   | 20                                             |                                              | 5.11                                                  | 8.1                                                     | 4.54                                            | 2.79                                            | 150                         | 330                                           | 11.6                               | 23.1                                                           | 0.1                           | 40.5                 | 15           | 11           | 22.0                                   |
| n       | n               | y        | n        | n       | n                                                 | 1                                                   | 12                                 | 163                                | 94                                  | 110                                  | 20                                             |                                              | 3.65                                                  | 6.2                                                     | 5.12                                            | 0.63                                            | 106                         | 308                                           | n                                  | n                                                              | 1.9                           | 36.1                 | 10           | 15           | 5.0                                    |
| n       | n               | y        | n        | n       | n                                                 | 1                                                   | 11                                 | 119                                | 87                                  | 80                                   | 20                                             |                                              | 4.26                                                  | 5.3                                                     | 3.54                                            | 1.44                                            | 113                         | 269                                           | 18.2                               | 25.2                                                           | 0.4                           | 46.3                 | 8            | 16           | 37.2                                   |
| n       | n               | n        | n        | n       | n                                                 | 7                                                   | 11                                 | 142                                | 104                                 | 80                                   | 20                                             |                                              | 5.10                                                  | 6.9                                                     | 4.48                                            | 1.76                                            | 154                         | 210                                           | n                                  | n                                                              | 0.1                           | 42.2                 | 13           | 9            | 20.2                                   |
| n       | n               | n        | n        | n       | n                                                 | 14                                                  | 7                                  | 120                                | 96                                  | 100                                  | 20                                             |                                              | 4.16                                                  | 4.9                                                     | 2.49                                            | 2.13                                            | 123                         | 247                                           | 17.8                               | 28.9                                                           | 0.52                          | 40.5                 | 36.8         | 36.6         | 7.6                                    |
| n       | y               | n        | n        | n       | n                                                 | 3                                                   | 14                                 | 105                                | 62                                  | 102                                  | 18                                             |                                              | 5.15                                                  | 6.45                                                    | 6.77                                            | 0.69                                            | 126                         | 93                                            | 132                                | 27.3                                                           | 0.26                          | 40                   | 18           | 42           | 18.3                                   |
| n       | y               | n        | n        | n       | n                                                 | 3                                                   | 16                                 | 110                                | 68                                  | 79                                   | 20                                             |                                              | 4                                                     | 4.98                                                    | 7.54                                            | 2.18                                            | 126                         | 170                                           | 14.5                               | 29.8                                                           | 0.29                          | 41.1                 | 21           | 37           | 5.7                                    |
| n       | y               | n        | n        | n       | n                                                 | 5                                                   | 18                                 | 133                                | 77                                  | 95                                   | 20                                             |                                              | 3.57                                                  | 5.22                                                    | 8.21                                            | 0.75                                            | 156                         | 196                                           | 14.9                               | 33                                                             | 0.3                           | 46.9                 | 40           | 26           | 8.4                                    |
| n       | n               | n        | n        | n       | n                                                 | 4                                                   | 18                                 | 147                                | 70                                  | 88                                   | 22                                             |                                              | 5.21                                                  | 4.75                                                    | 5.62                                            | 2.28                                            | 137                         | 177                                           | 14                                 | 38.3                                                           | 0.31                          | 52.6                 | 8            | 20           | 2.8                                    |
| n       | n               | n        | n        | n       | n                                                 | 5                                                   | 16                                 | 113                                | 70                                  | 84                                   | 20                                             |                                              | 5.23                                                  | 3.1                                                     | 6.38                                            | 1.65                                            | 144                         | 114                                           | 15.8                               | 35.1                                                           | 0.27                          | 42.6                 | 8            | 23           | 8.1                                    |
| n       | n               | n        | n        | n       | n                                                 | 2                                                   | 14                                 | 100                                | 60                                  | 88                                   | 16                                             |                                              | 4.21                                                  | 4.6                                                     | 8.52                                            | 1.09                                            | 105                         | 140                                           | 15.5                               | 45.8                                                           | 0.29                          | 40.2                 | 12           | 27           | 2.8                                    |
| n       | n               | n        | n        | n       | n                                                 | 3                                                   | 12                                 | 121                                | 84                                  | 95                                   | 20                                             |                                              | 5.11                                                  | 4.57                                                    | 2.72                                            | 1.42                                            | 153                         | 259                                           | 9.7                                | 25.8                                                           | 1.37                          | 41.6                 | 74.4         | 79.3         | 8.6                                    |
| n       | n               | n        | n        | n       | n                                                 | 4                                                   | 12                                 | 130                                | 90                                  | 80                                   | 20                                             |                                              | 5.02                                                  | 2.36                                                    | 1.36                                            | 0.83                                            | 151                         | 113                                           | 12.7                               | 33.9                                                           | 0.35                          | 40.4                 | 20           | 24           | 4.8                                    |
| n       | n               | n        | n        | n       | n                                                 | 4                                                   | 14                                 | 108                                | 78                                  | 80                                   | 18                                             |                                              | 4.98                                                  | 7.23                                                    | 5.72                                            | 1.09                                            | 129                         | 325                                           | 12.1                               | 25.4                                                           | 0.49                          | 34.7                 | 12           | 23           | 5.8                                    |
| y       | n               | n        | n        | n       | n                                                 | 4                                                   | 23                                 | 125                                | 82                                  | 76                                   | 22                                             |                                              | 3.56                                                  | 5.34                                                    | 3.78                                            | 1.08                                            | 139                         | 173                                           | 12.5                               | 23.6                                                           | 0.28                          | 39.9                 | 30           | 31           | 7.2                                    |
| y       | n               | n        | n        | n       | n                                                 | 10                                                  | 17                                 | 122                                | 76                                  | 79                                   | 20                                             |                                              | 4.23                                                  | 4.15                                                    | 3.13                                            | 0.71                                            | 164                         | 176                                           | 13                                 | 27.9                                                           | 0.32                          | 45.6                 | 35           | 28           | 6.5                                    |
| n       | y               | n        | n        | n       | n                                                 | 15                                                  | 20                                 | 130                                | 70                                  | 69                                   | 18                                             |                                              | 5.23                                                  | 4.2                                                     | 5.1                                             | 2.25                                            | 128                         | 164                                           | n                                  | n                                                              | 0.21                          | 40.2                 | 34           | 23           | 5.2                                    |
| n       | n               | n        | n        | n       | n                                                 | 1                                                   | 12                                 | 135                                | 89                                  | 80                                   | 19                                             |                                              | 5.23                                                  | 3.61                                                    | 4.16                                            | 6                                               | 132                         | 193                                           | 13.2                               | 22.5                                                           | 0.25                          | 39.2                 | 21           | 25.2         | 8.2                                    |
| y       | n               | n        | n        | n       | n                                                 | 7                                                   | 21                                 | 136                                | 92                                  | 76                                   | 19                                             |                                              | 4.43                                                  | 4.78                                                    | 4.23                                            | 1.81                                            | 141                         | 133                                           | 13.5                               | 27.4                                                           | 0.2                           | 42.4                 | 44.3         | 29.2         | 14.1                                   |
| n       | n               | n        | n        | n       | n                                                 | 4                                                   | 29                                 | 126                                | 82                                  | 72                                   | 18                                             |                                              | 5.24                                                  | 4.31                                                    | 2.14                                            | 1.72                                            | 155                         | 209                                           | 14.6                               | 31.1                                                           | 0.27                          | 50                   | 15           | 16           | 10.9                                   |
| n       | n               | n        | n        | n       | n                                                 | 1                                                   | 6                                  | 123                                | 91                                  | 102                                  | 24                                             |                                              | 4.25                                                  | 5.37                                                    | 3.28                                            | 1.65                                            | 115                         | 210                                           | 12.7                               | 23.4                                                           | 0.75                          | 43.2                 | 30           | 40           | 6.4                                    |
| n       | n               | n        | n        | n       | n                                                 | 1                                                   | 9                                  | 125                                | 75                                  | 68                                   | 18                                             |                                              | 4.13                                                  | 5.18                                                    | 3.37                                            | 1.87                                            | 138                         | 219                                           | 14.6                               | 30.1                                                           | 0.39                          | 45.8                 | 15           | 17           | 7.7                                    |
| n       | n               | n        | n        | n       | n                                                 | 1                                                   | 12                                 | 126                                | 68                                  | 71                                   | 21                                             |                                              | 4.37                                                  | 5.98                                                    | 2.79                                            | 2.83                                            | 135                         | 162                                           | 14.6                               | 33.3                                                           | 0.26                          | 48.3                 | 13           | 18           | 19.6                                   |
| n       | y               | n        | n        | n       | n                                                 | 3                                                   | 13                                 | 100                                | 64                                  | 98                                   | 16                                             |                                              | 4.8                                                   | 5.54                                                    | 3.69                                            | 1.5                                             | 342                         | 159                                           | 12.8                               | 27.3                                                           | 0.03                          | 43.1                 | 38           | 27           | 8.5                                    |
| n       | n               | n        | n        | n       | n                                                 | 1                                                   | 7                                  | 144                                | 88                                  | 83                                   | 20                                             |                                              | 4.9                                                   | 6.04                                                    | 8.43                                            | 15                                              | 120                         | 94                                            | 15.2                               | 26.7                                                           | 0.21                          | 42                   | 15           | 45           | 18.1                                   |
| n       | y               | n        | n        | n       | n                                                 | 1                                                   | 6                                  | 136                                | 76                                  | 76                                   | 22                                             |                                              | 5.12                                                  | 7.53                                                    | 4.84                                            | 2.06                                            | 145                         | 227                                           | 14.2                               | 35.2                                                           | 0.27                          | 47.5                 | 18           | 17           | 14                                     |
| n       | n               | n        | y        | n       | n                                                 | 2                                                   | 15                                 | 128                                | 80                                  | 90                                   | 23                                             |                                              | 5.23                                                  | 3.1                                                     | 5.74                                            | 0.93                                            | 125                         | 98                                            | 13.2                               | 33.6                                                           | 0.36                          | 46                   | 17           | 26           | 6.4                                    |
| n       | n               | n        | n        | n       | n                                                 | 7                                                   | 7                                  | 116                                | 69                                  | 79                                   | 19                                             |                                              | 4.32                                                  | 7.19                                                    | 3.84                                            | 2.65                                            | 135                         | 61                                            | 13.6                               | 28.4                                                           | 0.28                          | 43.8                 | 40           | 27           | 9.4                                    |
| y       | n               | y        | n        | n       | n                                                 | 7                                                   | 25                                 | 124                                | 74                                  | 82                                   | 20                                             |                                              | 4.21                                                  | 3.5                                                     | 1.49                                            | 1.73                                            | 137                         | 183                                           | 9.8                                | 24.9                                                           | 0.26                          | 44.1                 | 22.6         | 0.89         | 9.4                                    |
| y       | y               | n        | n        | y       | 15                                                | 14                                                  | 30                                 | 120                                | 87                                  | 93                                   | 24                                             |                                              | 4.87                                                  | 8.13                                                    | 6.24                                            | 1.35                                            | 146                         | 213                                           | 363                                | 21.5                                                           | 0.31                          | 42.5                 | 28.2         | 23.5         | 9.1                                    |
| n       | n               | n        | n        | n       | n                                                 | 4                                                   | 18                                 | 128                                | 87                                  | 75                                   | 19                                             |                                              | 4.21                                                  | 3.53                                                    | 3.09                                            | 0.45                                            | 136                         | 146                                           | 17.5                               | 30.2                                                           | 0.51                          | 41.3                 | 27.4         | 21.5         | 7.4                                    |

|   |   |   |   |   |    |    |    |     |    |     |    |  |      |      |       |      |     |     |      |      |      |      |      |      |      |
|---|---|---|---|---|----|----|----|-----|----|-----|----|--|------|------|-------|------|-----|-----|------|------|------|------|------|------|------|
| n | n | n | n | n | n  | 7  | 21 | 109 | 87 | 79  | 19 |  | 6.46 | 6.43 | 3.6   | 2.35 | 184 | 147 | 21.6 | 28.2 | 0.07 | 45.8 | 74.4 | 35   | 11.2 |
| y | n | y | n | n | n  | 4  | 24 | 124 | 82 | 100 | 20 |  | 3.93 | 2.94 | 1.73  | 0.93 | 116 | 122 | 11.3 | 28.6 | 0.16 | 40.3 | 11   | 10.3 | 14.5 |
| n | n | n | n | n | n  | 15 | 21 | 98  | 65 | 69  | 16 |  | 5.32 | 3.82 | 2.98  | 0.72 | 159 | 209 | 13.5 | 27.5 | 0.15 | 35.3 | 20.5 | 35.3 | 11.4 |
| n | n | n | n | n | n  | 15 | 27 | 100 | 78 | 75  | 17 |  | 3.13 | 2.42 | 1.78  | 0.56 | 120 | 89  | 9.2  | 21   | 0.04 | 44.2 | 20.2 | 25.3 | 9.45 |
| n | y | n | n | n | n  | 2  | 17 | 161 | 92 | 98  | 17 |  | 4.42 | 5.13 | 4.13  | 1.09 | 135 | 287 | 10.6 | 18.2 | 0.71 | 41.3 | 20.3 | 30   | 15.2 |
| n | n | n | n | n | n  | 4  | 14 | 104 | 68 | 78  | 16 |  | 5.56 | 4.70 | 3.30  | 1.19 | 175 | 303 | 11.2 | 19.2 | 0.45 | 45.7 | 10.4 | 14.7 | 6.3  |
| n | n | n | n | n | n  | 5  | 14 | 129 | 99 | 90  | 18 |  | 3.58 | 3.09 | 1.98  | 1.04 | 123 | 180 | 11.3 | 25.2 | 0.72 | 40.1 | 28.2 | 29.2 | 7.2  |
| y | n | n | n | n | n  | 6  | 16 | 129 | 90 | 90  | 20 |  | 6.14 | 10.3 | 8.74  | 1.07 | 147 | 268 | 10.6 | 24.8 | 0.3  | 62.8 | 22   | 16   | 13.1 |
| n | n | n | n | n | n  | 1  | 22 | 148 | 95 | 90  | 20 |  | 5.22 | 4.9  | 3.17  | 1.23 | 150 | 179 | 12.3 | 24.1 | 0.1  | 39.8 | 18   | 24   | 28.1 |
| y | n | n | n | y | 15 | 13 | 22 | 142 | 91 | 113 | 21 |  | 3.88 | 7    | 4.92  | 1.51 | 117 | 267 | 11.2 | 25.1 | 0.4  | 32.8 | 50   | 20   | 10.2 |
| n | n | n | n | n | n  | 3  | 14 | 105 | 62 | 102 | 18 |  | 4.25 | 8.59 | 3.18  | 1.21 | 161 | 319 | 14.9 | 27.6 | 0.32 | 39.2 | 23   | 23   | 7.7  |
| n | n | n | n | n | n  | 3  | 16 | 110 | 68 | 79  | 20 |  | 4.23 | 2.64 | 4.08  | 1.49 | 108 | 128 | 14.4 | 37.2 | 0.27 | 45.4 | 7    | 14   | 6    |
| n | n | n | n | n | n  | 2  | 11 | 110 | 70 | 76  | 19 |  | 4.75 | 3.73 | 5.37  | 1.28 | 102 | 132 | 16.9 | 38.7 | 0.36 | 39   | 23   | 48   | 11.6 |
| n | n | n | n | n | n  | 3  | 12 | 120 | 80 | 80  | 19 |  | 5.21 | 6    | 4.09  | 1.74 | 152 | 199 | 15   | 34   | 0.29 | 48.5 | 18   | 27   | 34.3 |
| n | n | n | n | n | n  | 4  | 16 | 147 | 86 | 95  | 21 |  | 5.25 | 7.79 | 5.87  | 1.32 | 160 | 294 | 13.2 | 28.6 | 0.33 | 42   | 25   | 25   | 7.7  |
| y | n | n | n | n | n  | 10 | 10 | 143 | 79 | 83  | 22 |  | 4    | 4.98 | 5.73  | 2.03 | 126 | 170 | 14.5 | 29.8 | 0.29 | 14.1 | 21   | 37   | 5.7  |
| n | n | n | n | n | n  | 6  | 19 | 162 | 90 | 79  | 21 |  | 4.23 | 4.98 | 4.23  | 0.73 | 139 | 223 | 13.5 | 36.2 | 0.35 | 49   | 29   | 15   | 10.3 |
| y | n | n | n | n | n  | 15 | 20 | 130 | 70 | 69  | 18 |  | 4.23 | 4.55 | 2.87  | 1.15 | 138 | 163 | 11   | 25.6 | 0.38 | 39.5 | 47   | 45   | 8.8  |
| y | n | y | n | n | n  | 14 | 15 | 114 | 76 | 80  | 19 |  | 4.63 | 3.61 | 2.44  | 0.91 | 137 | 285 | 12.5 | 31   | 0.24 | 35.3 | 33   | 35   | 5.9  |
| y | n | n | n | n | n  | 5  | 11 | 135 | 85 | 86  | 18 |  | 4.79 | 4.79 | 3.38  | 0.89 | 141 | 119 | 12.5 | 25.4 | 0.15 | 33.8 | 20.6 | 23.7 | 18.1 |
| n | n | n | n | n | n  | 2  | 7  | 126 | 69 | 69  | 21 |  | 5.21 | 3.84 | 6.19  | 1.69 | 165 | 187 | 13.8 | 26.5 | 0.31 | 49   | 33   | 26   | 8.4  |
| n | n | n | n | n | n  | 6  | 13 | 128 | 86 | 90  | 21 |  | 5.04 | 6.23 | 5.39  | 1.52 | 160 | 205 | 13.2 | 28.6 | 0.33 | 46   | 23   | 26   | 8.5  |
| n | n | n | n | n | n  | 3  | 13 | 140 | 90 | 92  | 20 |  | 4.61 | 8.92 | 5.91  | 2.42 | 122 | 192 | 无    | 无    | 0.21 | 45.1 | 12.7 | 13.8 | 19.7 |
| n | n | n | n | n | n  | 1  | 17 | 100 | 64 | 88  | 19 |  | 5.63 | 6.73 | 3.21  | 3.11 | 164 | 262 | 10.1 | 26.6 | 0.06 | 50.1 | 6.8  | 16.6 | 25.1 |
| n | n | n | n | n | n  | 2  | 12 | 120 | 80 | 90  | 20 |  | 3.76 | 4.38 | 3.02  | 1.08 | 93  | 120 | 无    | 无    | 0.11 | 51.7 | 17   | 22.1 | 26.2 |
| n | n | n | n | n | n  | 2  | 16 | 134 | 88 | 88  | 20 |  | 4.56 | 6.63 | 5.19  | 1.06 | 180 | 134 | 12.2 | 27.4 | 0.28 | 45.2 | 15.5 | 18.2 | 11.1 |
| n | n | n | n | n | n  | 3  | 14 | 125 | 84 | 89  | 17 |  | 5.87 | 8.5  | 6.63  | 1.35 | 152 | 210 | 无    | 无    | 0.21 | 48.1 | 16.9 | 16.1 | 18.8 |
| n | n | n | n | n | n  | 2  | 11 | 130 | 78 | 88  | 18 |  | 5.29 | 4.51 | 2.04  | 2.19 | 102 | 204 | 8.8  | 24   | 0.24 | 44.4 | 15.6 | 15.4 | 15.4 |
| n | n | n | n | n | n  | 4  | 10 | 130 | 78 | 85  | 17 |  | 5.25 | 4.31 | 1.68  | 0.37 | 123 | 180 | 11.4 | 18.2 | 0.88 | 34.1 | 18.4 | 22.3 | 13.2 |
| n | n | n | n | n | n  | 8  | 12 | 127 | 80 | 84  | 20 |  | 5.19 | 2.24 | 1.65  | 0.34 | 153 | 102 | 无    | 无    | 1.09 | 35.4 | 62.6 | 79.4 | 5.54 |
| n | n | n | n | n | n  | 6  | 15 | 133 | 77 | 90  | 19 |  | 4.42 | 1.6  | 1.06  | 0.44 | 115 | 96  | 无    | 无    | 0.88 | 41.8 | 46.6 | 50.5 | 10.6 |
| n | n | n | n | n | n  | 4  | 25 | 141 | 81 | 96  | 18 |  | 4.98 | 2.69 | 1.88  | 0.69 | 127 | 72  | 12.5 | 33.5 | 0.02 | 43.6 | 13.9 | 25.3 | 12.3 |
| n | n | n | n | n | n  | 9  | 15 | 130 | 87 | 90  | 18 |  | 4.89 | 2.43 | 1.45  | 0.31 | 145 | 120 | 10.3 | 15.9 | 0.56 | 45.6 | 45.6 | 54.6 | 5.57 |
| n | n | n | n | n | n  | 5  | 9  | 139 | 89 | 85  | 21 |  | 3.47 | 2.58 | 1.89  | 0.39 | 198 | 124 | 12.4 | 14.5 | 0.58 | 48.5 | 48.4 | 53.2 | 15.3 |
| n | n | n | n | n | n  | 4  | 10 | 119 | 77 | 86  | 17 |  | 4.14 | 4.56 | 3.54  | 1.45 | 99  | 125 | 11.4 | 13.4 | 0.55 | 54.3 | 16   | 25.6 | 27.5 |
| n | n | n | n | n | n  | 5  | 12 | 145 | 96 | 97  | 20 |  | 5.43 | 4.56 | 2.45  | 2.67 | 157 | 246 | 8.6  | 21   | 0.2  | 44.5 | 14.8 | 15.3 | 15.7 |
| n | n | n | n | n | n  | 1  | 11 | 138 | 88 | 94  | 18 |  | 5.32 | 6.42 | 2.45  | 1.56 | 143 | 264 | 13.1 | 24.3 | 0.45 | 49.7 | 11.1 | 13.5 | 6    |
| n | n | n | n | n | n  | 6  | 14 | 140 | 86 | 99  | 23 |  | 5.42 | 3.45 | 1.86  | 0.64 | 146 | 253 | 13.5 | 20.5 | 0.5  | 47.3 | 13.6 | 15.2 | 16.4 |
| n | n | n | n | n | n  | 2  | 13 | 132 | 86 | 90  | 18 |  | 5.11 | 6.29 | 4.48  | 1.17 | 161 | 138 | 12   | 17.6 | 0.68 | 42.5 | 54.1 | 38.8 | 21.3 |
| n | n | n | n | n | n  | 2  | 9  | 118 | 89 | 87  | 22 |  | 4.31 | 1.45 | 1.87  | 0.46 | 136 | 137 | 14   | 18.6 | 0.69 | 46.4 | 48.5 | 58.3 | 14.5 |
| n | n | n | n | n | n  | 1  | 13 | 120 | 72 | 84  | 20 |  | 4.26 | 2.55 | 1.59  | 0.76 | 93  | 215 | 14   | 33.6 | 0.36 | 46   | 14.5 | 16   | 19.7 |
| n | n | n | n | n | n  | 1  | 12 | 116 | 90 | 132 | 22 |  | 4.65 | 6.63 | 5.16  | 0.97 | 143 | 175 | 11.7 | 24.3 | 1.09 | 50.2 | 18.5 | 19.5 | 12   |
| n | n | n | n | n | n  | 3  | 7  | 113 | 88 | 90  | 26 |  | 4.3  | 6.65 | 2.39  | 3.68 | 114 | 134 | 13.8 | 33.6 | 0.46 | 46.7 | 10.9 | 42.2 | 8.2  |
| n | n | n | n | n | n  | 14 | 6  | 112 | 72 | 118 | 20 |  | 3.47 | 1.5  | 0.83  | 0.62 | 97  | 48  | 11.8 | 24.3 | 0.12 | 38.9 | 67.6 | 82.1 | 9.2  |
| n | n | n | n | n | n  | 3  | 12 | 114 | 70 | 100 | 20 |  | 3.72 | 4.34 | 2.49  | 1.58 | 99  | 146 | 无    | 无    | 0.17 | 45.6 | 8.4  | 11.6 | 16.2 |
| n | n | n | n | n | n  | 4  | 13 | 103 | 61 | 108 | 21 |  | 3.87 | 3.85 | 2.8   | 0.8  | 111 | 91  | 无    | 无    | 0.34 | 39.3 | 7.4  | 10.7 | 9.4  |
| n | n | n | n | n | n  | 1  | 13 | 117 | 81 | 88  | 19 |  | 5.74 | 8    | 5.44  | 2.05 | 165 | 199 | 10.6 | 32.5 | 0.21 | 46.8 | 17.2 | 11.6 | 16.9 |
| n | n | n | n | n | n  | 7  | 17 | 120 | 77 | 79  | 17 |  | 6.42 | 7.85 | 6.42  | 2.57 | 146 | 221 | 11.5 | 35.5 | 0.26 | 45.3 | 10.3 | 12.6 | 14.7 |
| n | n | n | n | n | n  | 3  | 12 | 140 | 88 | 90  | 20 |  | 4.26 | 5.72 | 3.95  | 1.27 | 131 | 128 | 10.5 | 27.7 | 0.21 | 42.3 | 10.8 | 13.2 | 16.5 |
| n | n | n | n | n | n  | 3  | 13 | 109 | 78 | 98  | 20 |  | 4.68 | 5.16 | 3.37  | 1.28 | 142 | 182 | 无    | 无    | 0.26 | 41.6 | 7.8  | 10.6 | 8.8  |
| n | n | n | n | n | n  | 3  | 14 | 115 | 76 | 104 | 22 |  | 5.01 | 19.1 | 16.29 | 2.05 | 141 | 210 | 无    | 无    | 0.21 | 40.4 | 18.6 | 11.2 | 19.1 |
| n | n | n | n | n | n  | 2  | 18 | 120 | 84 | 90  | 20 |  | 4.45 | 6.25 | 5.37  | 0.48 | 126 | 79  | 12.3 | 15.2 | 0.45 | 40.9 | 10.7 | 12.2 | 11.1 |
| n | n | n | n | n | n  | 7  | 11 | 126 | 72 | 80  | 20 |  | 4.72 | 11.3 | 10.28 | 0.55 | 137 | 239 | 12   | 24.4 | 0.56 | 36.2 | 51.2 | 42   | 12.5 |
| n | n | n | n | n | n  | 1  | 11 | 140 | 90 | 98  | 28 |  | 4.31 | 15.3 | 5.75  | 0.42 | 175 | 218 | 16.8 | 29.1 | 0.37 | 42.1 | 34   | 17.3 | 16.8 |
| n | n | n | n | n | n  | 3  | 12 | 112 | 73 | 90  | 18 |  | 4.73 | 5.16 | 3.26  | 1.58 | 139 | 288 | 12   | 21.9 | 0.19 | 45.9 | 14.9 | 14.5 | 12.5 |
| n | n | n | n | n | n  | 5  | 15 | 108 | 77 | 85  | 17 |  | 4.32 | 5.31 | 4.2   | 1.46 | 147 | 247 | 10.3 | 24.1 | 0.16 | 46.3 | 14.2 | 16.2 | 11.5 |
| n | n | n | n | n | n  | 1  | 11 | 115 | 79 | 105 | 20 |  | 3.93 | 8.76 | 7.27  | 0.96 | 109 | 202 | 9.34 | 24   | 0.56 | 38   | 14.4 | 17.3 | 8.5  |
| y | n | n | n | n | n  | 4  | 16 | 130 | 83 | 101 | 23 |  | 4.44 | 5.37 | 3.85  | 1.31 | 137 | 186 | 10.4 | 24.3 | 0.24 | 44.6 | 15.2 | 14.5 | 6    |

| Potassium ion, (mmol/L) | Sodium (mmol/L) | Creatinine (μmol/L) | Creatinine (U/L) | Lactic dehydrogenase (U/L) | hs-cTnI, pg/mL3 | PCT (ng/mL) | CRP (ng/mL) | HS-CRP (ng/mL) | ESR (mm/h) |
|-------------------------|-----------------|---------------------|------------------|----------------------------|-----------------|-------------|-------------|----------------|------------|
| 4                       | 144.3           | 46.7                | 33.2             | 179.8                      | 0.53            | 0.14        | 13.4        | 》10            | 44         |
| 3.46                    | 139.6           | 67.4                | 104              | 266.9                      | 0.52            | 0.2         | ≤10         | 《0.499         | 64         |
| 3.97                    | 109.5           | 57                  | 101              | 153.6                      | 0.53            | 《0.1        | 《10         | 2.05           | 26         |
| 4.75                    | 136.3           | 85.3                | 41               | 245.2                      | 0.41            | 0.24        | 23.5        | 》10            | 21         |
| 3.88                    | 140.8           | 63.3                | 65.9             | 303.9                      | 0.60            | 《0.1        | 22          | 》10            | 14         |
| 3.51                    | 146.2           | 135                 | 85.3             | 204.2                      | 0.4             | 0.14        | 35.2        | 》10            | 10         |
| 5.23                    | 139.4           | 70.2                | 103              | 180.3                      | 0.45            | 0.14        | 26.8        | 》10            | 46         |
| 5.56                    | 140.8           | 47.9                | 32               | 221.2                      | 0.01            | 0.13        | 10.1        | 》10            | 5          |
| 4.01                    | 139.0           | 67.5                | 28.5             | 180.1                      | 0.01            | 0.19        | 《10         | 6.43           | 47         |
| 4.12                    | 140.6           | 54.9                | 139              | 240.9                      | 0.64            | <0.1        | 《10         | 《0.499         | 30         |
| 4.49                    | 138.3           | 43                  | 51.8             | 234.8                      | 0.68            | 0.11        | 《10         | 2.06           | 12         |
| 3.57                    | 143.2           | 53.7                | 7                | 226                        | 0.55            | 0.15        | 29.5        | 3.97           | 80         |
| 3.33                    | 142.2           | 65.3                | 148              | 343                        | 0.02            | 0.13        | 61.4        | 》10            | 118        |
| 3.99                    | 139.8           | 86.6                | 23               | 112                        | 0.2             | 0.2         | 22.3        | 》10            | 40         |
| 3.66                    | 140.4           | 77.3                | 23               | 148                        | 0.23            | 0.14        | 37.3        | 》10            | 52         |
| 3.69                    | 140.7           | 84.2                | 58               | 190                        | 0.04            | 0.19        | 55.5        | 》10            | 135        |
| 3.20                    | 139.0           | 52.8                | 25               | 129                        | 0.06            | 0.02        | 18.01       | 》10            | 73         |
| 3.56                    | 139.7           | 57.8                | 32               | 163                        | 0.01            | 0.19        | 5.3         |                | 115        |
| 3.77                    | 138.9           | 49.7                | 37               | 182                        | 0.67            | 0.16        | 6.8         |                | 34         |
| 3.87                    | 138.5           | 76.7                | 436              | 402                        | 0.52            | 0.29        | 67.2        | 》10            | 48         |
| 3.64                    | 141.8           | 72.1                | 25               | 133                        | 0.57            | 0.34        | 0.3         |                | 15         |
| 6.14                    | 131.4           | 1187                | 22               | 196                        | 0.43            | 6.85        | 110.6       | 》10            | 128        |
| 2.97                    | 141.2           | 68.0                | 44               | 191                        | 0.47            | 0.19        | 4.90        |                | 110        |
| 3.61                    | 140.3           | 57.0                | 65               | 141                        | 0.48            | 0.16        | 10.6        | 》10            | 25         |
| 3.1                     | 139             | 46.4                | 55.4             | 249.1                      | 0.38            | N           | <10         | 1.31           | 44         |
| 3.52                    | 146.1           | 94.2                | 125              | 363                        | 0.67            | 0.05        | 28.1        | >3             | 37         |
| 3.64                    | 139.2           | 59.9                | 61               | 249                        | 0.45            | 0.051       | 20.67       | >3             | 39         |
| 3.51                    | 138             | 202                 | 45               | 215                        | 0.64            | 0.34        | 16.65       | >3             | 67         |
| 3.55                    | 142.8           | 52.2                | 66               | 186                        | 0.34            | 0.04        | <3          | 2.27           | 23         |
| 3.8                     | 138.9           | 76.9                | 43               | 215                        | n               | 0.04        | <3          | 0.63           | 8          |
| 3.08                    | 141.2           | 71.1                | 158              | 296                        | 0.05            | 0.132       | 117.77      | >3             | 32         |
| 5.77                    | 142.4           | 94.5                | 540              | 561.6                      | 0.80            | 0.11        | 136.3       | 》10            | 87         |
| 3.6                     | 139.4           | 57                  | 42               | 179                        | 0.01            | 0.13        | <10         | <0.499         | 13         |
| 3.8                     | 140.1           | 55                  | 25               | 236                        | 0.02            | 0           | 38.08       | >10            | 127        |
| 3.4                     | 139             | 83                  | 388              | 215                        | 0.25            | 0.09        | <10         | <0.5           | 6          |
| 4.2                     | 142.2           | 77                  | 83               | 204                        | 0.27            | 0           | <10         | <0.499         | 16         |
| 3.8                     | 139.2           | 69                  | 42               | 198                        | 0.07            | 0.14        | 1.3         | 1.3            | 19         |
| 6.2                     | 139.2           | 46                  | 45               | 153                        | 0.23            | 0.21        | 20.4        | 20.4           | 29         |
| 3.9                     | 138             | 93                  | 136              | 164.8                      | 0.028           | 0.05        | 10.31       | >10            | 8          |
| 4.35                    | 139.9           | 74.9                | 98               | 140                        | 0.25            | 0.04        | <3          | <0.5           | 7          |
| 4.25                    | 142.9           | 46.8                | 86               | 192                        | 0.025           | 0.04        | <3          | <0.5           | 20         |
| 4.41                    | 138.5           | 47.3                | 72               | 141                        | 0.036           | 0.04        | <3          | <0.5           | 2          |
| 3.58                    | 137             | 42.1                | 59               | 110                        | 0.043           | 0.04        | <3          | <0.5           | 9          |
| 4.31                    | 136.4           | 79.4                | 56               | 127                        | 0.06            | 0.12        | <3          | <0.5           | 6          |
| 5.02                    | 140.6           | 94.8                | 124              | 408                        | 0.36            | 0.05        | 27.8        | >3             | 14         |
| 4.27                    | 140.3           | 64.2                | 74               | 137                        | 0.025           | 0.18        | <3          | <0.5           | 4          |
| 4.45                    | 138.1           | 48.4                | 129              | 156                        | 0.64            | 0.20        | 3.54        | >3             | 12         |
| 4.38                    | 140.1           | 78                  | 101              | 152                        | 0.025           | 0.03        | <3          | <0.5           | 5          |
| 4.82                    | 142.2           | 53.6                | 76.2             | 183.6                      | 0.38            | 0.21        | <10         | 0.91           | 20         |
| 5.75                    | 146.2           | 68.3                | 46.1             | 275.4                      | 0.26            | 0.14        | 15          | >10            | 81         |
| 5.32                    | 135.3           | 67.3                | 63               | 274.3                      | 0.53            | 0.21        | 53.2        | 》10            | 87         |

|      |       |      |      |       |      |       |       |        |     |
|------|-------|------|------|-------|------|-------|-------|--------|-----|
| 5.25 | 140.7 | 129  | 164  | 249.4 | 1.26 | 0.19  | 10.3  | 》10    | 34  |
| 4.02 | 141.5 | 60.5 | 36.2 | 180.8 | 0.72 | <0.1  | >10   | 13.5   | 60  |
| 4.25 | 135.3 | 74.2 | 180  | 370.4 | 0.01 | 0.13  | 17.5  | 》10    | 7   |
| 4.01 | 139.2 | 56   | 102  | 198.2 | 0.02 | 0.13  | 53.4  | 》10    | 99  |
| 4.2  | 145.2 | 48.5 | 30.1 | 213   | 0.67 | 《0.1  | 《10   | 《0.499 | 53  |
| 2.87 | 143.3 | 49.3 | 69   | 195.8 | 0.51 | 0.32  | 69.4  | 》10    | 17  |
| 4.3  | 140.2 | 60.2 | 58.3 | 210.3 | 0.56 | 0.2   | 《10   | 3.45   | 60  |
| 3.14 | 141.6 | 54.4 | 21   | 206   | 0.47 | 0.18  | 28.7  | 3.76   | 85  |
| 3.16 | 138.0 | 79.5 | 7    | 225   | 0.68 | 0.29  | 24.5  | 》10    | 50  |
| 2.9  | 135   | 67.6 | 5    | 304   | 0.05 | 0.17  | <10   | 2.57   | 130 |
| 3.84 | 138.1 | 103  | 101  | 196   | 0.31 | 0.07  | 35.3  | 》10    | 46  |
| 3.67 | 141.6 | 53.7 | 46   | 123   | 0.42 | 0.04  | 26.3  | 》10    | 45  |
| 3.98 | 140.9 | 88.5 | 50   | 219   | 0.02 | 0.04  | <3    | <0.5   | 14  |
| 3.73 | 140.1 | 92.7 | 61   | 172   | 0.13 | 0.04  | <3    | 1.14   | 10  |
| 4.03 | 137.1 | 78.2 | 68   | 165   | 0.05 | 0.04  | 8.8   | >3     | 11  |
|      |       | 59.9 | 61   | 249   |      | 0.051 | 20.67 | >3     |     |
| 3.73 | 142.3 | 56.2 | 46   | 159.3 | 0.53 | 0.12  | <10   | <0.499 | 13  |
| 3.2  | 138.9 | 57   | 56   | 212   | 0.34 | 0     | 10.63 | >10    | 2   |
| 3.7  | 138.5 | 71   | 38   | 205   | 0.31 | 0     | 15.4  | >10    | 43  |
| 4.28 | 139.7 | 60.5 | 204  | 210.9 | 0.31 | 0.05  | 57.06 | >10    | 11  |
| 4.32 | 140.9 | 62.5 | 59   | 151   | 0.03 | 0.06  | <3    | <0.5   | 4   |
| 4.03 | 137.1 | 80.3 | 68   | 165   | 0.05 | 0.04  | 8.8   | >3     | 11  |
| 4.67 | 139.8 | 53.3 | 61.6 | 167.3 | 0.71 | 0.13  | ≤10   | ≤0.499 | 25  |
| 4.84 | 144.4 | 81.8 | 164  | 135.6 | 0.54 | 《0.1  | ≤10   | ≤0.499 | 40  |
| 3.87 | 140.1 | 44.1 | 56.9 | 206.3 | 0.54 | 0.16  | ≤10   | ≤0.499 | 7   |
| 4.48 | 145.6 | 57.3 | 123  | 196.4 | 0.5  | 《0.1  | ≤10   | ≤0.499 | 26  |
| 4.82 | 145.6 | 96.1 | 92.3 | 180.1 | 0.63 | 《0.1  | ≤10   | 3      | 21  |
| 4.55 | 142.5 | 49.2 | 47.7 | 128.8 | 0.46 | 《0.1  | ≤10   | 8.54   | 7   |
| 4.67 | 138.1 | 45.3 | 54.3 | 241.3 | 0.41 | 《0.1  | ≤10   | ≤0.499 | 24  |
| 4.78 | 136.1 | 65.9 | 33   | 228.4 | 0.02 | 0.39  | 14.4  | ≥10    | 22  |
| 4    | 145.8 | 51.1 | 52.6 | 270.1 | 0.52 | 《0.1  | ≤10   | 9.37   | 11  |
| 3.91 | 142   | 65.3 | 173  | 228.9 | 0.48 | 0.11  | 132.6 | ≥10    | 110 |
| 4.36 | 146.1 | 64.9 | 27   | 210.9 | 0.04 | 0.45  | 15.3  | ≥10    | 25  |
| 4.35 | 143.6 | 64.2 | 48   | 201.3 | 0.67 | 0.46  | ≤10   | ≤0.499 | 18  |
| 3.98 | 143.1 | 46.5 | 58.7 | 202.3 | 0.45 | 0.14  | ≤10   | ≤0.499 | 8   |
| 4.32 | 154.7 | 47.4 | 48.6 | 143.5 | 0.56 | 《0.1  | ≤10   | 8.69   | 6   |
| 4.59 | 139.4 | 53.9 | 105  | 197   | 0.6  | 《0.1  | 《10   | 《0.499 | 11  |
| 4.75 | 147.4 | 55.3 | 98.4 | 145.1 | 0.53 | 《0.1  | 《10   | 《0.499 | 15  |
| 4.88 | 140.1 | 71.1 | 37.8 | 136.7 | 0.51 | 0.17  | 14.8  | 》10    | 62  |
| 4.67 | 157.4 | 59.5 | 53.6 | 265.3 | 0.46 | 《0.1  | ≤10   | 8.35   | 15  |
| 4.29 | 140.2 | 61.8 | 52.3 | 155.3 | 0.66 | 《0.1  | 《10   | 《0.499 | 8   |
| 3.72 | 137.9 | 98.5 | 123  | 194.9 | 0.64 | 0.17  | 29.9  | 》10    | 6   |
| 4.45 | 134.1 | 38.3 | 114  | 367.2 | 0.73 | 1.5   | 《10   | 0.51   | 8   |
| 3.9  | 129.6 | 67.5 | 40.8 | 755   | 0.57 | 1.16  | 78.6  | 》10    | 18  |
| 4.04 | 141.1 | 47.5 | 35.8 | 130.5 | 0.65 | 0.13  | 《10   | 《0.499 | 35  |
| 4.3  | 138.9 | 62.2 | 42   | 126.9 | 0.49 | 0.13  | ≤10   | 《0.499 | 30  |
| 4.23 | 142.1 | 69.1 | 52.6 | 156.8 | 0.83 | 《0.1  | 《10   | 《0.499 | 3   |
| 5.32 | 145.7 | 70.4 | 46.2 | 164   | 0.35 | 《0.1  | 《10   | 《0.499 | 6   |
| 4.63 | 138.4 | 53.2 | 23.1 | 138.9 | 0.46 | 0.17  | 《10   | 5.35   | 2   |
| 4.5  | 142.4 | 73.1 | 64.5 | 155   | 0.34 | 1.06  | 28.1  | 》10    | 25  |
| 4.47 | 143.2 | 72.5 | 17.7 | 156.8 | 0.57 | 3.91  | 《10   | 0.6    | 5   |
| 3.7  | 136.9 | 50.9 | 77.7 | 183   | 0.44 | 《0.1  | 45    | 》10    | 47  |
| 3.78 | 136.8 | 69.6 | 112  | 271.8 | 0.81 | 0.27  | 91.8  | 》10    | 89  |
| 3.91 | 138.9 | 86.5 | 150  | 187.4 | 0.6  | 《0.1  | 82.8  | 》10    | 28  |
| 4.32 | 136.9 | 58.4 | 73.3 | 180.8 | 0.36 | 0.2   | 《10   | 《0.499 | 6   |
| 4.62 | 147.2 | 74.3 | 78.3 | 153.6 | 0.41 | 1.06  | 53.2  | 》10    | 16  |
| 3.21 | 140.8 | 43.5 | 105  | 213   | 0.56 | 《0.1  | 65.6  | 》10    | 79  |
| 4.22 | 146.5 | 55.9 | 56.8 | 149.7 | 0.44 | 0.18  | 《10   | 《0.499 | 14  |



|      | Cohort    | sex(1, male; 2,female) | age (year) | waist line(cm) | blood pressure(mmHg) | height(cm) | weight (kg) | BMI (kg/m <sup>2</sup> ) | White blood cell (10 <sup>9</sup> /L) | Red blood cell (10 <sup>12</sup> /L) | Hemoglobin(g/L) | Platelet (10 <sup>9</sup> /L) | Neutrophil (10 <sup>9</sup> /L) | Lymphocyte (10 <sup>9</sup> /L) | ALT(U/L) | AST(U/L) | albumin(g/L) | Total bilirubin(mmol/L) | Creatinine (μmol/L) |
|------|-----------|------------------------|------------|----------------|----------------------|------------|-------------|--------------------------|---------------------------------------|--------------------------------------|-----------------|-------------------------------|---------------------------------|---------------------------------|----------|----------|--------------|-------------------------|---------------------|
| H002 | Discovery | 2                      | 49         | 64             | 95/62                | 158.5      | 49.2        | 19.58                    | 5                                     | 4.19                                 | 137             | 248                           | 2.54                            | 1.98                            | 12       | 19       | 46.4         | 7.7                     | 52                  |
| H003 | Discovery | 1                      | 41         | 96             | 158/107              | 169.5      | 82.6        | 28.75                    | 4.3                                   | 4.4                                  | 145             | 250                           | 2.76                            | 1.16                            | 42       | 23       | 48.3         | 8.57                    | 68                  |
| H004 | Discovery | 1                      | 53         | 92.5           | 124/85               | 181        | 75.5        | 23.26                    | 4.8                                   | 4.6                                  | 143             | 233                           | 2.31                            | 1.86                            | 23       | 26       | 46.4         | 7.71                    | 81                  |
| H005 | Discovery | 1                      | 52         | 83             | 122/80               | 168.5      | 67.7        | 23.84                    | 6.61                                  | 5.18                                 | 160             | 199                           | 3.6                             | 2.65                            | 27       | 21       | 49.9         | 9.03                    | 70                  |
| H008 | Discovery | 1                      | 38         | 83             | 129/80               | 177.5      | 73.2        | 23.23                    | 4.71                                  | 5.83                                 | 182             | 187                           | 2.64                            | 1.81                            | 23       | 22       | 53.1         | 11.2                    | 85                  |
| H009 | Discovery | 1                      | 44         | 93             | 122/79               | 167        | 74.5        | 26.71                    | 5.69                                  | 5.55                                 | 161             | 232                           | 3.85                            | 1.45                            | 45       | 29       | 50           | 7.08                    | 70                  |
| H010 | Discovery | 2                      | 45         | 70             | 116/68               | 164.5      | 58.7        | 21.69                    | 4.8                                   | 3.73                                 | 87              | 349                           | 2.85                            | 1.45                            | 10       | 19       | 44.2         | 8                       | 57                  |
| H011 | Discovery | 2                      | 37         |                |                      | 168.5      | 70.2        | 24.725                   | 4.33                                  | 4.06                                 | 114             | 300                           | 2.79                            | 1.27                            | 11       | 16       | 45.6         | 4.57                    | 47                  |
| H013 | Discovery | 1                      | 42         | 96             | 143/88               | 165        | 80.8        | 29.68                    | 6                                     | 5                                    | 155             | 246                           | 2.96                            | 2.32                            | 21       | 20       | 49.3         | 13.45                   | 65                  |
| H015 | Discovery | 1                      | 35         | 73             | 109/65               | 165        | 54.8        | 20.13                    | 4.2                                   | 5.05                                 | 157             | 169                           | 2.22                            | 1.56                            | 17       | 22       | 49           | 11.8                    | 72                  |
| H017 | Discovery | 1                      | 61         | 91             | 141/83               | 171        | 74.2        | 25.38                    | 7.46                                  | 5.31                                 | 167             | 333                           | 4.33                            | 2.51                            | 27       | 19       | 44.6         | 11.67                   | 76                  |
| H019 | Discovery | 2                      | 37         | 71             | 113/72               | 167.5      | 62.7        | 22.35                    | 4.85                                  | 4.54                                 | 138             | 173                           | 2.41                            | 2.05                            | 18       | 18       | 47.4         | 11.48                   | 57                  |
| H020 | Discovery | 1                      | 50         | 101            | 145/98               | 170.5      | 84.3        | 29                       | 7.8                                   | 4.95                                 | 151             | 229                           | 4.88                            | 2.25                            | 52       | 30       | 46.7         | 12.5                    | 80                  |
| H021 | Discovery | 1                      | 35         | 89             | 118/74               | 179        | 81.7        | 25.5                     | 6.69                                  | 4.91                                 | 161             | 253                           | 4.65                            | 1.49                            | 26       | 21       | 46.2         | 10                      | 62                  |
| H023 | Discovery | 1                      | 37         | 97             | 109/76               | 177        | 91.6        | 29.24                    | 7.8                                   | 4.99                                 | 147             | 243                           | 4.91                            | 2.31                            | 24       | 22       | 51.1         | 18.74                   | 86                  |
| H024 | Discovery | 2                      | 52         | 77             | 137/78               | 160        | 60.2        | 23.52                    | 5                                     | 4.82                                 | 82              | 554                           | 3.03                            | 1.33                            | 14       | 15       | 41.8         | 5.7                     | 36                  |
| H025 | Discovery | 2                      | 57         | 85             | 130/69               | 147.5      | 54          | 24.82                    | 6.5                                   | 4.44                                 | 134             | 338                           | 3.57                            | 2.39                            | 33       | 34       | 47.3         | 10.8                    | 55                  |
| H027 | Discovery | 2                      | 56         | 71             | 122/70               | 161.5      | 53.4        | 20.47                    | 3.9                                   | 4.55                                 | 137             | 252                           | 1.49                            | 1.98                            | 23       | 26       | 44.5         | 5.9                     | 54                  |
| H028 | Discovery | 2                      | 39         | 72             | 95/55                | 156        | 55.9        | 22.97                    | 3.35                                  | 4.4                                  | 128             | 199                           | 2.11                            | 0.88                            | 13       | 20       | 47.2         | 7.1                     | 58                  |
| H029 | Discovery | 1                      | 39         | 95             | 127/86               | 167.5      | 83.8        | 29.87                    | 6.43                                  | 4.82                                 | 149             | 187                           | 4.08                            | 1.75                            | 12       | 18       | 47.8         | 9.1                     | 87                  |
| H032 | Discovery | 2                      | 58         | 77             | 153/99               | 162.5      | 57.6        | 21.81                    | 5.29                                  | 4.32                                 | 130             | 264                           | 3.02                            | 1.89                            | 13       | 20       | 45.9         | 6.44                    | 55                  |
| H034 | Discovery | 1                      | 45         | 82             | 111/60               | 161.5      | 61          | 23.39                    | 5.96                                  | 5.04                                 | 157             | 286                           | 3.25                            | 1.92                            | 24       | 24       | 52.1         | 18.45                   | 71                  |
| H035 | Discovery | 2                      | 46         | 87             | 126/72               | 158.5      | 65.6        | 26.11                    | 6.62                                  | 4.8                                  | 143             | 299                           | 4.61                            | 1.59                            | 19       | 25       | 46.9         | 7.57                    | 64                  |
| H036 | Discovery | 2                      | 34         | 71             | 131/65               | 176        | 71.4        | 23.05                    | 2.97                                  | 3.98                                 | 91              | 278                           | 1.4                             | 1.34                            | 23       | 20       | 45.3         | 8.45                    | 56                  |
| H039 | Discovery | 1                      | 53         | 86             | 139/92               | 155.5      | 64          | 26.47                    | 6.7                                   | 4.85                                 | 154             | 262                           | 3.82                            | 2.26                            | 35       | 25       | 52.1         | 13.19                   | 67                  |
| H040 | Discovery | 2                      | 50         | 95             | 142/82               | 166.5      | 79          | 28.5                     | 6.76                                  | 4.34                                 | 125             | 304                           | 4                               | 2.05                            | 22       | 31       | 42.1         | 15.35                   | 61                  |
| H041 | Discovery | 1                      | 61         | 96             | 147/97               | 168        | 79.9        | 28.52                    | 4.75                                  | 5.08                                 | 155             | 190                           | 2.81                            | 1.44                            | 16       | 18       | 43.3         | 26.04                   | 81                  |
| H044 | Discovery | 1                      | 37         | 94             | 111/72               | 179        | 86.4        | 26.97                    | 5.99                                  | 5.09                                 | 161             | 229                           | 3.19                            | 2.31                            | 19       | 16       | 44.6         | 10.68                   | 76                  |
| H048 | Discovery | 1                      | 50         | 98             | 120/77               | 172        | 86.3        | 29.17                    | 7.7                                   | 5.2                                  | 162             | 272                           | 4.89                            | 2.02                            | 19       | 18       | 46.2         | 6.62                    | 73                  |
| H049 | Discovery | 2                      | 52         | 75             | 134/78               | 158        | 59.6        | 23.87                    | 6.42                                  | 4.86                                 | 144             | 313                           | 3.51                            | 2.4                             | 12       | 18       | 42.7         | 10.29                   | 54                  |
| H051 | Discovery | 1                      | 43         | 87             | 140/101              | 175.5      | 70.9        | 23.02                    | 7.3                                   | 4.96                                 | 155             | 210                           | 4.52                            | 1.91                            | 41       | 35       | 51.7         | 9.1                     | 64                  |
| H053 | Discovery | 1                      | 41         | 90             | 128/88               | 176.5      | 80.5        | 26.1                     | 6                                     | 5.46                                 | 172             | 303                           | 3.53                            | 2.08                            | 23       | 21       | 43.6         | 12.6                    | 72                  |
| H057 | Discovery | 2                      | 65         | 108            | 171/83               | 154        | 79.8        | 33.65                    | 5.94                                  | 4.8                                  | 129             | 239                           | 3.39                            | 1.97                            | 14       | 19       | 48.7         | 7.73                    | 49                  |
| H058 | Discovery | 1                      | 48         | 91             | 124/86               | 168.5      | 68.7        | 24.2                     | 8.31                                  | 5.51                                 | 169             | 233                           | 5.14                            | 2.47                            | 36       | 28       | 50.7         | 15.1                    | 53                  |
| H059 | Discovery | 2                      | 36         | 84             | 79/44                | 159        | 60.1        | 23.77                    | 4.21                                  | 4.42                                 | 140             | 211                           | 2.31                            | 1.58                            | 16       | 17       | 48.4         | 14.31                   | 55                  |
| H060 | Discovery | 2                      | 38         | 82             | 123/80               | 159        | 78.5        | 31.05                    | 7.2                                   | 4.11                                 | 127             | 361                           | 4.59                            | 2.04                            | 13       | 18       | 45.6         | 7.8                     | 48                  |
| H061 | Discovery | 1                      | 64         | 98             | 122/78               | 161.5      | 76.8        | 29.45                    | 7.64                                  | 4.68                                 | 136             | 269                           | 4.85                            | 2.09                            | 23       | 21       | 49.4         | 11.28                   | 84                  |
| H062 | Discovery | 2                      | 35         | 68             | 109/70               | 165.5      | 58.3        | 21.28                    | 6.31                                  | 4.26                                 | 128             | 238                           | 3.95                            | 1.83                            | 16       | 18       | 46.5         | 4.3                     | 51                  |
| H063 | Discovery | 1                      | 56         | 80             | 101/62               | 166        | 61.5        | 22.32                    | 4.5                                   | 4.44                                 | 143             | 134                           | 2.25                            | 1.76                            | 43       | 29       | 47.9         | 9                       | 64                  |
| H064 | Discovery | 2                      | 66         | 86             | 135/61               | 164        | 56.9        | 21.16                    | 6.01                                  | 3.96                                 | 124             | 210                           | 2.99                            | 2.25                            | 22       | 23       | 46.4         | 5.7                     | 70                  |
| H065 | Discovery | 2                      | 34         | 68             | 101/59               | 168        | 54.7        | 19.38                    | 4.28                                  | 4.44                                 | 138             | 252                           | 2.17                            | 1.68                            | 17       | 35       | 46.9         | 9.43                    | 58                  |
| H066 | Discovery | 2                      | 39         | 72             | 96/53                | 167        | 55.7        | 19.97                    | 5.67                                  | 4.67                                 | 138             | 247                           | 3.49                            | 1.63                            | 10       | 14       | 50           | 13.12                   | 60                  |
| H067 | Discovery | 1                      | 63         | 92             | 111/67               | 170        | 80.2        | 27.75                    | 5.3                                   | 5.07                                 | 154             | 266                           | 2.82                            | 2                               | 22       | 19       | 47.3         | 12                      | 71                  |
| H070 | Discovery | 2                      | 58         | 83             | 104/66               | 161        | 62.4        | 23.92                    | 5.13                                  | 3.97                                 | 167             | 165                           | 2.12                            | 1.53                            | 22       | 20       | 51.6         | 18.2                    | 74                  |
| H071 | Discovery | 2                      | 57         | 89             | 115/73               | 154        | 58          | 24.46                    | 4.7                                   | 3.86                                 | 122             | 186                           | 3.09                            | 1.17                            | 11       | 13       | 46.6         | 12.31                   | 56                  |
| H073 | Discovery | 1                      | 42         | 90             | 132/77               | 172        | 81          | 27.38                    | 6                                     | 5.1                                  | 162             | 232                           | 3                               | 2.31                            | 22       | 21       | 44.5         | 19.86                   | 66                  |
| H074 | Discovery | 1                      | 44         | 88             | 124/74               | 161        | 68          | 26.23                    | 7.2                                   | 5.77                                 | 175             | 182                           | 4.26                            | 2.12                            | 28       | 22       | 50.5         | 11.27                   | 100                 |
| H075 | Discovery | 1                      | 37         | 81             | 116/76               | 179        | 72          | 22.47                    | 4.42                                  | 5.08                                 | 162             | 141                           | 2.34                            | 1.25                            | 22       | 29       | 48           | 14.96                   | 84                  |
| H076 | Discovery | 2                      | 35         | 68             | 109/72               | 162        | 50          | 19.05                    | 4                                     | 4.5                                  | 134             | 192                           | 2.09                            | 1.63                            | 15       | 17       | 51.9         | 14.4                    | 52                  |
| H078 | Discovery | 1                      | 37         | 79             | 141/94               | 174        | 57.5        | 19.16                    | 5.65                                  | 5.63                                 | 165             | 163                           | 3.44                            | 1.65                            | 13       | 18       | 50.7         | 15.54                   | 80                  |
| H079 | Discovery | 2                      | 44         | 77             | 150/97               | 154        | 62          | 26.14                    | 6.11                                  | 4.26                                 | 127             | 284                           | 3.34                            | 1.83                            | 30       | 28       | 48.1         | 19.77                   | 53                  |
| H083 | Discovery | 1                      | 40         | 96             | 171/106              | 180        | 92          | 28.7                     | 5.34                                  | 4.95                                 | 160             | 257                           | 3.27                            | 1.65                            | 17       | 16       | 52.9         | 28.99                   | 75                  |
| H084 | Discovery | 1                      | 51         | 90             | 151/93               | 162        | 67          | 25.91                    | 6.94                                  | 5.59                                 | 168             | 235                           | 3.62                            | 2.45                            | 35       | 32       | 54.2         | 17.26                   | 79                  |
| H086 | Discovery | 1                      | 52         | 89             | 111/71               | 177        | 81          | 25.85                    | 5.87                                  | 4.37                                 | 147             | 287                           | 3.73                            | 1.66                            | 18       | 24       | 50.2         | 12.75                   | 88                  |
| H088 | Discovery | 1                      | 62         | 100            | 184/96               | 164        | 77          | 28.63                    | 5.2                                   | 4.94                                 | 141             | 168                           | 3.16                            | 1.61                            | 18       | 24       | 50.5         | 14.27                   | 76                  |

|      |            |   |    |     |         |       |       |        |       |      |     |     |      |      |    |    |      |       |     |
|------|------------|---|----|-----|---------|-------|-------|--------|-------|------|-----|-----|------|------|----|----|------|-------|-----|
| H089 | Discovery  | 1 | 45 | 93  | 137/96  | 172   | 81    | 27.38  | 6.57  | 5.33 | 163 | 333 | 4.14 | 1.56 | 20 | 21 | 49.7 | 17.6  | 81  |
| H090 | Discovery  | 2 | 62 | 94  | 147/74  | 154   | 63    | 26.56  | 5.39  | 5.15 | 146 | 208 | 3.09 | 1.68 | 32 | 24 | 49.8 | 15    | 51  |
| H091 | Discovery  | 2 | 52 | 71  | 99/59   | 160   | 53    | 20.7   | 5.06  | 4.71 | 145 | 235 | 2.65 | 1.95 | 7  | 20 | 45.3 | 7.99  | 50  |
| H092 | Discovery  | 1 | 34 | 98  | 136/73  | 169   | 86.9  | 30.46  | 7.69  | 5.31 | 160 | 257 | 5.08 | 2.1  | 19 | 16 | 52.5 | 6.78  | 82  |
| H093 | Discovery  | 1 | 38 | 90  | 109/69  | 172   | 79    | 26.7   | 6.52  | 5.04 | 159 | 201 | 4.25 | 1.77 | 18 | 18 | 51   | 10.88 | 74  |
| H094 | Discovery  | 1 | 44 | 78  | 133/96  | 164   | 65    | 24.17  | 5.81  | 5.11 | 169 | 218 | 3.71 | 1.66 | 22 | 24 | 53   | 9.58  | 78  |
| H096 | Discovery  | 1 | 35 |     |         | 170   | 70    | 24.221 | 3.81  | 4.94 | 156 | 163 | 2.29 | 1.23 | 23 | 17 | 48.6 | 6.73  | 64  |
| H097 | Discovery  | 1 | 58 | 94  | 128/77  | 171   | 82    | 28.04  | 6.91  | 5.02 | 156 | 305 | 4.56 | 1.73 | 29 | 23 | 51.4 | 22.1  | 85  |
| H098 | Discovery  | 2 | 41 | 70  | 83/52   | 160   | 50    | 19.53  | 4.91  | 4.09 | 135 | 227 | 2.94 | 1.61 | 9  | 16 | 47.4 | 12.37 | 55  |
| H099 | Discovery  | 1 | 36 | 84  | 114/74  | 171   | 69    | 23.6   | 6.45  | 5.19 | 167 | 283 | 3.67 | 2.3  | 21 | 25 | 49.5 | 21.19 | 69  |
| H100 | Discovery  | 2 | 34 | 81  | 122/75  | 156   | 66    | 27.12  | 7.09  | 4.7  | 144 | 212 | 4.67 | 1.52 | 4  | 18 | 44.9 | 5.88  | 44  |
| H102 | Discovery  | 1 | 74 | 93  | 142/76  | 176   | 78    | 25.18  | 8.16  | 4.82 | 151 | 241 | 5.14 | 2.37 | 14 | 20 | 47.1 | 11.16 | 73  |
| H104 | Discovery  | 2 | 33 | 73  | 105/66  | 154   | 53    | 22.35  | 7.54  | 4.47 | 142 | 281 | 4.83 | 2.22 | 10 | 17 | 49   | 6.7   | 65  |
| H107 | Discovery  | 1 | 38 | 100 | 114/73  | 166   | 85    | 30.85  | 6.29  | 5.16 | 158 | 230 | 3.14 | 2.65 | 31 | 22 | 49.8 | 12.45 | 81  |
| H108 | Discovery  | 2 | 39 | 87  | 124/82  | 158   | 82    | 32.85  | 10.24 | 4.62 | 142 | 220 | 7.27 | 2.32 | 13 | 17 | 48.1 | 10.5  | 56  |
| H109 | Discovery  | 1 | 37 | 112 | 113/72  | 180   | 118   | 36.42  | 5.43  | 5.22 | 150 | 246 | 3.02 | 1.83 | 39 | 23 | 47.1 | 6.4   | 73  |
| H110 | Discovery  | 1 | 35 | 103 | 117/76  | 169   | 90    | 31.51  | 5.95  | 4.87 | 151 | 221 | 3.43 | 1.98 | 36 | 21 | 46.2 | 8     | 73  |
| H113 | Discovery  | 1 | 42 | 93  | 144/92  | 170.5 | 80.6  | 27.73  | 5.04  | 5.47 | 167 | 192 | 2.75 | 1.75 | 56 | 35 | 51.7 | 12.83 | 72  |
| H114 | Discovery  | 1 | 44 | 99  | 128/86  | 176   | 86    | 27.76  | 4.81  | 5.28 | 152 | 563 | 2.59 | 1.65 | 23 | 18 | 48.7 | 5.54  | 76  |
| H116 | Discovery  | 2 | 38 | 70  | 97/60   | 165   | 52    | 19.1   | 4.15  | 4.16 | 122 | 149 | 2.61 | 1.21 | 9  | 18 | 49.4 | 6.85  | 53  |
| H118 | Discovery  | 1 | 45 |     |         | 175   | 80    | 26.122 | 4.62  | 5.04 | 157 | 206 | 2.85 | 1.37 | 17 | 18 | 44.5 | 7.54  | 47  |
| H120 | Discovery  | 1 | 50 | 87  | 158/98  | 173   | 75.2  | 25.13  | 6.53  | 4.83 | 147 | 256 | 3.4  | 2.52 | 31 | 23 | 44.8 | 8.2   | 79  |
| H122 | Discovery  | 1 | 42 | 100 | 125/75  | 181   | 92    | 28.08  | 5.55  | 5.14 | 156 | 298 | 2.9  | 2.25 | 25 | 15 | 48.7 | 14.1  | 83  |
| H123 | Discovery  | 2 | 51 | 73  | 104/71  | 155   | 57    | 23.73  | 4.12  | 4.14 | 131 | 185 | 2.11 | 1.68 | 26 | 22 | 45.3 | 9.7   | 61  |
| H124 | Discovery  | 1 | 53 | 100 | 143/99  | 165   | 86    | 31.59  | 5.74  | 4.71 | 150 | 240 | 3.17 | 2.17 | 20 | 22 | 48.2 | 23.2  | 79  |
| H125 | Discovery  | 1 | 43 | 84  | 107/68  | 176   | 69    | 22.28  | 6.57  | 4.82 | 154 | 162 | 3.89 | 1.91 | 17 | 23 | 50   | 13.51 | 81  |
| H126 | Discovery  | 1 | 53 | 86  | 133/89  | 175   | 78    | 25.47  | 6.35  | 5.48 | 162 | 260 | 4.23 | 1.42 | 26 | 31 | 47.3 | 11.6  | 90  |
| H127 | Discovery  | 2 | 47 | 78  | 116/75  | 162   | 57    | 21.72  | 5.7   | 4.71 | 146 | 288 | 3.82 | 1.33 | 10 | 15 | 52.8 | 12.84 | 48  |
| H130 | Discovery  | 1 | 52 | 85  | 117/67  | 173   | 74    | 24.73  | 4.73  | 4.67 | 150 | 257 | 2.98 | 1.46 | 14 | 20 | 45.4 | 8.92  | 78  |
| H131 | Discovery  | 1 | 35 | 87  | 118/75  | 169   | 66    | 23.11  | 9.27  | 5.54 | 155 | 261 | 4.94 | 3.58 | 19 | 18 | 48   | 19.43 | 90  |
| H133 | Discovery  | 2 | 47 | 77  | 118/76  | 162   | 55.3  | 21.07  | 5.04  | 4.32 | 140 | 179 | 2.63 | 1.95 | 12 | 22 | 44.2 | 9.03  | 51  |
| H137 | Discovery  | 1 | 42 | 85  | 113/72  | 175   | 75    | 24.49  | 4.83  | 4.72 | 152 | 255 | 3.39 | 1.1  | 26 | 19 | 47.6 | 13.88 | 66  |
| H139 | Discovery  | 1 | 50 | 90  | 124/83  | 182   | 90    | 27.17  | 5.68  | 5.57 | 171 | 302 | 2.39 | 2.72 | 18 | 25 | 52.8 | 11.62 | 90  |
| H141 | Discovery  | 2 | 45 | 70  | 102/57  | 164   | 57.7  | 21.56  | 4.03  | 3.88 | 119 | 245 | 2.4  | 1.17 | 15 | 21 | 50.1 | 5.69  | 51  |
| H142 | Discovery  | 1 | 47 | 89  | 133/84  | 177   | 75    | 23.94  | 4.32  | 5.47 | 167 | 196 | 2.6  | 1.31 | 30 | 21 | 49   | 22.6  | 79  |
| H146 | Discovery  | 2 | 42 | 73  | 101/62  | 161   | 56.9  | 21.99  | 4.52  | 4.11 | 126 | 205 | 2.77 | 1.42 | 12 | 16 | 42.6 | 4.62  | 60  |
| H147 | Discovery  | 1 | 47 | 97  | 143/97  | 167   | 79    | 28.33  | 5.95  | 5.07 | 157 | 217 | 3.91 | 1.53 | 24 | 24 | 45.9 | 13    | 110 |
| H149 | Discovery  | 1 | 44 | 93  | 129/67  | 182   | 90.4  | 27.29  | 5.43  | 4.65 | 154 | 280 | 3.39 | 1.58 | 11 | 17 | 50.9 | 10.26 | 89  |
| H150 | Discovery  | 2 | 52 | 76  | 139/79  | 165   | 54    | 19.83  | 4.86  | 4.59 | 138 | 278 | 2.35 | 2.27 | 9  | 16 | 48.6 | 6.05  | 50  |
| H006 | Validation | 1 | 50 | 75  | 146/96  | 161   | 59.5  | 22.95  | 6.7   | 4.79 | 154 | 283 | 3.54 | 2.21 | 17 | 19 | 49.5 | 10.5  | 63  |
| H014 | Validation | 2 | 57 | 91  | 142/77  | 154.5 | 72.4  | 30.33  | 6.7   | 3.77 | 129 | 397 | 4.33 | 1.83 | 26 | 26 | 48.2 | 8.12  | 50  |
| H016 | Validation | 2 | 58 | 92  | 157/86  | 159   | 71.7  | 28.36  | 5.5   | 4.8  | 137 | 289 | 2.45 | 2.56 | 26 | 28 | 47   | 8.9   | 44  |
| H018 | Validation | 2 | 59 | 82  | 115/71  | 159.5 | 64.4  | 25.31  | 4.74  | 4.23 | 137 | 262 | 2.58 | 1.88 | 77 | 41 | 47.1 | 13.98 | 69  |
| H026 | Validation | 2 | 35 | 80  | 123/77  | 167   | 71.2  | 25.53  | 5.14  | 4.21 | 133 | 273 | 2.67 | 1.64 | 12 | 15 | 43.7 | 3.4   | 70  |
| H030 | Validation | 2 | 40 |     |         | 160   | 60.2  | 23.516 | 5.05  | 4.18 | 132 | 278 | 2.56 | 2.38 | 24 | 28 | 44.2 | 9.14  | 76  |
| H031 | Validation | 1 | 44 | 92  | 134/84  | 195   | 97.9  | 25.75  | 12.9  | 4.93 | 157 | 289 | 8.23 | 4.09 | 53 | 27 | 56.7 | 10.39 | 82  |
| H033 | Validation | 1 | 70 | 72  | 214/96  | 162.5 | 54.7  | 20.71  | 4.84  | 4.37 | 133 | 244 | 3.28 | 1.04 | 11 | 20 | 45.4 | 6.4   | 94  |
| H038 | Validation | 1 | 42 | 85  | 129/75  | 171.5 | 69    | 23.46  | 4.26  | 4.98 | 152 | 174 | 2.61 | 1.19 | 14 | 16 | 47.1 | 8.6   | 80  |
| H042 | Validation | 2 | 44 | 69  | 116/63  | 165.5 | 49.1  | 17.93  | 4.34  | 3.84 | 124 | 249 | 2.07 | 1.89 | 12 | 20 | 42.4 | 8.61  | 51  |
| H043 | Validation | 1 | 35 | 90  | 116/72  | 172.5 | 79.6  | 26.75  | 6.7   | 5.04 | 156 | 324 | 3.87 | 2.35 | 19 | 20 | 49.6 | 10.5  | 91  |
| H045 | Validation | 2 | 55 | 86  | 118/83  | 160   | 66.2  | 25.86  | 5.8   | 4.42 | 142 | 272 | 3.76 | 1.57 | 22 | 19 | 49.7 | 16.35 | 53  |
| H046 | Validation | 1 | 36 | 90  | 129/76  | 183   | 82.8  | 24.72  | 4.56  | 5.17 | 156 | 185 | 2.6  | 1.5  | 16 | 19 | 50.1 | 13.82 | 88  |
| H047 | Validation | 1 | 60 | 82  | 112/73  | 171   | 67.4  | 23.05  | 8.5   | 4.93 | 157 | 265 | 5.82 | 1.73 | 14 | 20 | 48.9 | 16.7  | 89  |
| H050 | Validation | 1 | 33 | --  | 158/103 | 169.5 | 79.8  | 27.78  | 5.67  | 5.06 | 152 | 303 | 2.79 | 2.36 | 36 | 22 | 50.8 | 14.81 | 69  |
| H052 | Validation | 1 | 66 | 93  | 108/70  | 171.5 | 75.8  | 25.77  | 4.71  | 4.78 | 161 | 130 | 3.12 | 1.17 | 11 | 16 | 48.4 | 24.96 | 84  |
| H054 | Validation | 1 | 39 | 119 | 123/79  | 183   | 134.4 | 40.85  | 7.5   | 4.63 | 145 | 251 | 4.68 | 2.03 | 38 | 21 | 45.7 | 9.27  | 97  |
| H055 | Validation | 2 | 36 | 75  | 97/54   | 168   | 63.7  | 22.57  | 4.1   | 4.11 | 125 | 235 | 2.57 | 1.06 | 9  | 15 | 46.3 | 12.45 | 51  |
| H056 | Validation | 1 | 66 | 83  | 138/59  | 171.5 | 65.1  | 22.13  | 6.2   | 3.72 | 80  | 365 | 4.59 | 1.15 | 15 | 17 | 45.3 | 8.85  | 48  |

|      |            |   |    |     |        |     |       |       |      |      |     |     |      |      |    |    |      |       |     |
|------|------------|---|----|-----|--------|-----|-------|-------|------|------|-----|-----|------|------|----|----|------|-------|-----|
| H068 | Validation | 1 | 34 | 71  | 141/83 | 182 | 59    | 17.81 | 3.97 | 5.13 | 167 | 165 | 2.12 | 1.53 | 22 | 20 | 51.6 | 18.2  | 74  |
| H069 | Validation | 2 | 58 | 83  | 127/72 | 170 | 62    | 21.45 | 4.54 | 4.75 | 145 | 145 | 3.06 | 1.13 | 25 | 27 | 48.1 | 8.36  | 87  |
| H072 | Validation | 1 | 34 | 108 | 124/75 | 183 | 109.5 | 32.85 | 6.22 | 4.85 | 152 | 284 | 3.12 | 2.34 | 31 | 18 | 47.7 | 13.8  | 75  |
| H077 | Validation | 1 | 48 | 90  | 142/89 | 169 | 74.3  | 26.01 | 6.38 | 4.29 | 99  | 267 | 3.87 | 1.35 | 14 | 18 | 50.7 | 10.24 | 96  |
| H080 | Validation | 2 | 41 | 86  | 102/70 | 158 | 63.9  | 26.04 | 5.52 | 4.85 | 155 | 228 | 3.76 | 1.44 | 14 | 13 | 46.4 | 13.2  | 63  |
| H081 | Validation | 2 | 52 | 74  | 114/76 | 161 | 54    | 20.83 | 6.01 | 4.11 | 125 | 293 | 3.8  | 1.82 | 13 | 19 | 47.6 | 10.1  | 59  |
| H082 | Validation | 1 | 52 | 78  | 129/77 | 163 | 60.1  | 22.62 | 6.16 | 5.35 | 165 | 210 | 3.99 | 1.77 | 23 | 27 | 49   | 8.36  | 60  |
| H085 | Validation | 1 | 48 | 89  | 105/80 | 174 | 69    | 22.79 | 7.82 | 5.27 | 167 | 227 | 4.98 | 2.24 | 36 | 15 | 49.6 | 5.11  | 62  |
| H087 | Validation | 1 | 40 | 88  | 117/70 | 182 | 79    | 23.85 | 4.48 | 4.81 | 156 | 217 | 2.56 | 1.43 | 15 | 19 | 44.5 | 19.32 | 77  |
| H095 | Validation | 1 | 34 | 88  | 112/73 | 174 | 76    | 25.1  | 7.27 | 5.36 | 160 | 302 | 4.11 | 2.4  | 23 | 19 | 52.2 | 10.17 | 100 |
| H101 | Validation | 1 | 48 | 100 | 116/75 | 169 | 80    | 28.01 | 7.08 | 5.13 | 161 | 276 | 4.25 | 2.21 | 21 | 21 | 41.9 | 8.47  | 73  |
| H103 | Validation | 1 | 52 | 88  | 120/71 | 166 | 67    | 24.31 | 8.07 | 5.16 | 158 | 252 | 4.7  | 2.8  | 20 | 22 | 45.8 | 11.59 | 94  |
| H105 | Validation | 2 | 37 | 71  | 108/62 | 162 | 54    | 20.58 | 4.66 | 3.89 | 120 | 168 | 2.92 | 1.42 | 10 | 20 | 44.2 | 15.81 | 74  |
| H106 | Validation | 1 | 57 | 84  | 114/56 | 160 | 67    | 26.17 | 5.91 | 4.9  | 158 | 258 | 3.43 | 1.97 | 26 | 26 | 46.2 | 11.32 | 68  |
| H111 | Validation | 1 | 33 | 97  | 122/79 | 171 | 87    | 29.75 | 6.43 | 5.47 | 167 | 366 | 3.56 | 2.06 | 53 | 34 | 49.1 | 12.7  | 83  |
| H112 | Validation | 1 | 42 | 87  | 124/77 | 172 | 76    | 25.69 | 4.87 | 4.65 | 147 | 179 | 3.35 | 1.02 | 28 | 21 | 45.3 | 11.2  | 89  |
| H115 | Validation | 2 | 47 | 82  | 112/73 | 158 | 61    | 24.44 | 6.39 | 4.63 | 148 | 265 | 3.43 | 2.53 | 35 | 28 | 47.5 | 7.37  | 65  |
| H117 | Validation | 2 | 52 | 75  | 103/64 | 161 | 55.9  | 21.6  | 3.47 | 4.54 | 141 | 208 | 1.45 | 1.78 | 13 | 17 | 50.1 | 14.97 | 67  |
| H119 | Validation | 1 | 46 | 82  | 111/86 | 172 | 68    | 22.99 | 5.08 | 4.96 | 162 | 212 | 2.85 | 1.71 | 47 | 30 | 52.1 | 13.09 | 88  |
| H121 | Validation | 1 | 50 | 85  | 136/78 | 176 | 69    | 22.28 | 7.42 | 5.06 | 149 | 239 | 3.5  | 3.36 | 22 | 21 | 47.3 | 10.4  | 75  |
| H129 | Validation | 1 | 46 | 85  | 134/85 | 175 | 71    | 23.18 | 7.79 | 4.62 | 148 | 227 | 5.54 | 1.82 | 23 | 21 | 46.3 | 12.42 | 72  |
| H132 | Validation | 2 | 47 | 68  | 119/71 | 167 | 52    | 18.65 | 5.82 | 4.93 | 120 | 191 | 4.02 | 1.32 | 11 | 20 | 46.9 | 5.41  | 56  |
| H135 | Validation | 2 | 48 | 77  | 115/70 | 166 | 66    | 23.95 | 4.38 | 4.94 | 147 | 198 | 2.37 | 1.57 | 32 | 31 | 51.2 | 8.77  | 61  |
| H136 | Validation | 2 | 36 | 69  | 89/59  | 158 | 54    | 21.63 | 4.96 | 4.21 | 133 | 210 | 3.04 | 1.52 | 22 | 20 | 48.3 | 11.5  | 58  |
| H138 | Validation | 1 | 52 | 85  | 123/79 | 166 | 74    | 26.85 | 7.79 | 4.94 | 150 | 215 | 4.87 | 2.22 | 19 | 23 | 49.1 | 10.02 | 91  |
| H140 | Validation | 1 | 36 | 82  | 121/74 | 166 | 73    | 26.49 | 4.64 | 4.77 | 151 | 209 | 2.84 | 1.38 | 23 | 22 | 47.1 | 10.33 | 85  |
| H143 | Validation | 1 | 38 | 88  | 123/79 | 170 | 75    | 25.95 | 5.43 | 4.55 | 148 | 195 | 3.42 | 1.6  | 21 | 27 | 46.6 | 12.36 | 74  |

**Table S2. The detailed values of oral microbial diversity index and observed OTUs**

| sample | reads | label | ace        | chao       | shannon  | simpson  | coverage | observed_otus |
|--------|-------|-------|------------|------------|----------|----------|----------|---------------|
| H002   |       | 0.97  | 393.001194 | 386.947368 | 3.626317 | 0.069363 | 0.998461 | 0             |
| H003   |       | 0.97  | 313.516709 | 311.028571 | 3.663356 | 0.052214 | 0.998255 | 0             |
| H004   |       | 0.97  | 379.303695 | 323.62069  | 3.077652 | 0.084126 | 0.998423 | 0             |
| H005   |       | 0.97  | 288.457977 | 293.12     | 3.547417 | 0.052441 | 0.99874  | 0             |
| H008   |       | 0.97  | 400.493814 | 346        | 3.304988 | 0.070381 | 0.998527 | 0             |
| H009   |       | 0.97  | 405.101998 | 420.181818 | 3.872127 | 0.049142 | 0.998252 | 0             |
| H010   |       | 0.97  | 375.242698 | 376.636364 | 3.852834 | 0.044048 | 0.998519 | 0             |
| H011   |       | 0.97  | 404.467414 | 398.5      | 4.066462 | 0.038751 | 0.998631 | 0             |
| H013   |       | 0.97  | 284.698688 | 280.4      | 3.127392 | 0.112333 | 0.997889 | 0             |
| H015   |       | 0.97  | 271.137015 | 269.545455 | 3.521795 | 0.056429 | 0.998968 | 0             |
| H017   |       | 0.97  | 299.069244 | 311.043478 | 2.767923 | 0.221506 | 0.998347 | 0             |
| H019   |       | 0.97  | 281.879763 | 284        | 3.393171 | 0.064752 | 0.998824 | 0             |
| H020   |       | 0.97  | 360.201795 | 357.871795 | 3.645244 | 0.051351 | 0.998874 | 0             |
| H021   |       | 0.97  | 397.602672 | 408.384615 | 4.14723  | 0.033005 | 0.99892  | 0             |
| H023   |       | 0.97  | 301.887509 | 300.24     | 3.743283 | 0.043285 | 0.998045 | 0             |
| H024   |       | 0.97  | 382.063152 | 399.576923 | 3.323818 | 0.149996 | 0.997563 | 0             |
| H025   |       | 0.97  | 547.376324 | 554.454545 | 3.840433 | 0.049574 | 0.998175 | 0             |
| H027   |       | 0.97  | 482.094826 | 486.5      | 3.848147 | 0.071178 | 0.997347 | 0             |
| H028   |       | 0.97  | 393.087759 | 417.964286 | 4.087172 | 0.032548 | 0.997387 | 0             |
| H029   |       | 0.97  | 541.002141 | 555.227273 | 4.325284 | 0.030273 | 0.997505 | 0             |
| H032   |       | 0.97  | 501.369451 | 502.25     | 4.566539 | 0.021108 | 0.99819  | 0             |
| H034   |       | 0.97  | 434.777132 | 462.285714 | 4.169537 | 0.033686 | 0.998035 | 0             |
| H035   |       | 0.97  | 384.965464 | 382.029412 | 3.643908 | 0.045131 | 0.998614 | 0             |
| H036   |       | 0.97  | 215.888007 | 207.681818 | 3.371759 | 0.078175 | 0.997687 | 0             |
| H039   |       | 0.97  | 288.185174 | 285.724138 | 3.502752 | 0.054795 | 0.998624 | 0             |
| H040   |       | 0.97  | 301.727777 | 305        | 3.923017 | 0.034552 | 0.998311 | 0             |
| H041   |       | 0.97  | 238.258229 | 254.176471 | 3.17776  | 0.073995 | 0.998507 | 0             |
| H044   |       | 0.97  | 444.927194 | 379.885714 | 3.328979 | 0.06756  | 0.997596 | 0             |
| H048   |       | 0.97  | 311.287961 | 327.869565 | 3.372457 | 0.068753 | 0.998331 | 0             |
| H049   |       | 0.97  | 367.347252 | 376.785714 | 3.622437 | 0.054288 | 0.998357 | 0             |
| H051   |       | 0.97  | 468.868811 | 467.857143 | 3.949637 | 0.040923 | 0.998654 | 0             |
| H053   |       | 0.97  | 289.49602  | 333.588235 | 4.020266 | 0.040995 | 0.99346  | 0             |
| H057   |       | 0.97  | 313.309177 | 298.885714 | 3.431635 | 0.081226 | 0.998723 | 0             |
| H058   |       | 0.97  | 321.564349 | 330.956522 | 4.527754 | 0.022796 | 0.996294 | 0             |
| H059   |       | 0.97  | 280.261418 | 293        | 4.182471 | 0.031467 | 0.996957 | 0             |
| H060   |       | 0.97  | 374.905541 | 384.5      | 3.947248 | 0.052507 | 0.99864  | 0             |
| H061   |       | 0.97  | 224.75926  | 218.884615 | 3.121565 | 0.1011   | 0.998477 | 0             |
| H062   |       | 0.97  | 417.486084 | 436        | 4.084288 | 0.03851  | 0.998871 | 0             |
| H063   |       | 0.97  | 310.643432 | 320.84     | 3.131096 | 0.128995 | 0.998753 | 0             |
| H064   |       | 0.97  | 373.367253 | 335.55     | 3.154969 | 0.095489 | 0.998244 | 0             |
| H065   |       | 0.97  | 372.416634 | 369        | 3.635714 | 0.05266  | 0.999002 | 0             |
| H066   |       | 0.97  | 371.75157  | 374.7      | 3.937268 | 0.070356 | 0.998527 | 0             |
| H067   |       | 0.97  | 272.95615  | 268.75     | 3.155743 | 0.095945 | 0.998199 | 0             |
| H070   |       | 0.97  | 321.407607 | 297.555556 | 3.243833 | 0.080268 | 0.997909 | 0             |
| H071   |       | 0.97  | 354.914726 | 346.733333 | 3.790552 | 0.042205 | 0.998068 | 0             |
| H073   |       | 0.97  | 332.25594  | 336.535714 | 3.668108 | 0.055766 | 0.998584 | 0             |
| H074   |       | 0.97  | 293.861752 | 255.04     | 3.001027 | 0.114752 | 0.998343 | 0             |
| H075   |       | 0.97  | 359.345533 | 360.833333 | 3.326184 | 0.077438 | 0.998351 | 0             |
| H076   |       | 0.97  | 331.645093 | 340.913043 | 3.51685  | 0.073197 | 0.998418 | 0             |
| H078   |       | 0.97  | 280.444414 | 273.285714 | 3.754298 | 0.041656 | 0.998065 | 0             |
| H079   |       | 0.97  | 237.105437 | 236.454545 | 3.442072 | 0.064504 | 0.998557 | 0             |
| H083   |       | 0.97  | 340.914685 | 339.088235 | 3.499005 | 0.063592 | 0.998783 | 0             |
| H084   |       | 0.97  | 362.04745  | 374.032258 | 3.143717 | 0.104884 | 0.998426 | 0             |
| H086   |       | 0.97  | 325.179036 | 335.12     | 3.626195 | 0.064753 | 0.998515 | 0             |
| H088   |       | 0.97  | 316.966125 | 316.333333 | 3.622894 | 0.06443  | 0.999097 | 0             |
| H089   |       | 0.97  | 274.974536 | 292.75     | 3.615629 | 0.06411  | 0.998472 | 0             |
| H090   |       | 0.97  | 228.457026 | 222.130435 | 3.395911 | 0.055679 | 0.997885 | 0             |
| H091   |       | 0.97  | 373.87658  | 369.675676 | 4.135947 | 0.033913 | 0.998009 | 0             |
| H092   |       | 0.97  | 298.155881 | 304.04     | 3.790043 | 0.043745 | 0.997976 | 0             |
| H093   |       | 0.97  | 247.896194 | 236.241379 | 3.340329 | 0.069168 | 0.998759 | 0             |
| H094   |       | 0.97  | 289.016516 | 298.5      | 3.615211 | 0.047918 | 0.99806  | 0             |
| H096   |       | 0.97  | 385.064338 | 379.4      | 3.472033 | 0.070506 | 0.998359 | 0             |
| H097   |       | 0.97  | 260.194542 | 251.12     | 3.21422  | 0.121316 | 0.997963 | 0             |
| H098   |       | 0.97  | 300.296701 | 304.344828 | 3.655016 | 0.040085 | 0.99892  | 0             |
| H099   |       | 0.97  | 374.872769 | 375.84375  | 3.97957  | 0.047036 | 0.998693 | 0             |
| H100   |       | 0.97  | 289.165512 | 283.40625  | 3.410902 | 0.062577 | 0.998568 | 0             |
| H102   |       | 0.97  | 277.718023 | 299.333333 | 3.476672 | 0.071915 | 0.998092 | 0             |
| H104   |       | 0.97  | 377.359279 | 372.682927 | 3.761414 | 0.045326 | 0.998698 | 0             |
| H107   |       | 0.97  | 377.160959 | 385.384615 | 4.001656 | 0.037103 | 0.998864 | 0             |
| H108   |       | 0.97  | 319.499689 | 318.757576 | 3.467445 | 0.071318 | 0.99842  | 0             |
| H109   |       | 0.97  | 326.259917 | 334.576923 | 3.451375 | 0.06592  | 0.998667 | 0             |
| H110   |       | 0.97  | 417.948049 | 404.714286 | 3.889648 | 0.042934 | 0.998228 | 0             |
| H113   |       | 0.97  | 380.291542 | 378.447368 | 3.956422 | 0.041643 | 0.998902 | 0             |
| H114   |       | 0.97  | 311.549281 | 318.5      | 3.47346  | 0.055156 | 0.999156 | 0             |
| H116   |       | 0.97  | 301.911709 | 304.037037 | 3.666083 | 0.044206 | 0.99902  | 0             |
| H118   |       | 0.97  | 362.04503  | 363.675676 | 3.609565 | 0.054361 | 0.998474 | 0             |
| H120   |       | 0.97  | 354.692422 | 350.447368 | 3.235137 | 0.093303 | 0.99808  | 0             |
| H122   |       | 0.97  | 368.914518 | 361.578947 | 3.261097 | 0.1096   | 0.99873  | 0             |

|      |  |      |            |            |          |          |          |   |
|------|--|------|------------|------------|----------|----------|----------|---|
| H123 |  | 0.97 | 415.99377  | 419.384615 | 3.671256 | 0.055758 | 0.997753 | 0 |
| H124 |  | 0.97 | 485.15303  | 455.34375  | 3.846044 | 0.04667  | 0.997866 | 0 |
| H125 |  | 0.97 | 343.094753 | 353.777778 | 4.170402 | 0.031298 | 0.995508 | 0 |
| H126 |  | 0.97 | 364.951335 | 379.04     | 4.084165 | 0.035867 | 0.998743 | 0 |
| H127 |  | 0.97 | 386.60337  | 312.357143 | 3.805426 | 0.037085 | 0.997199 | 0 |
| H130 |  | 0.97 | 270.90102  | 266.433333 | 3.326842 | 0.096151 | 0.998529 | 0 |
| H131 |  | 0.97 | 380.521993 | 375.108108 | 3.999678 | 0.043138 | 0.998986 | 0 |
| H133 |  | 0.97 | 329.157167 | 342.1      | 3.476503 | 0.070265 | 0.998251 | 0 |
| H137 |  | 0.97 | 306.443441 | 318.291667 | 3.392412 | 0.090206 | 0.998342 | 0 |
| H139 |  | 0.97 | 301.544503 | 299.5      | 3.288296 | 0.072273 | 0.999027 | 0 |
| H141 |  | 0.97 | 294.255167 | 289.085714 | 3.795019 | 0.036265 | 0.999352 | 0 |
| H142 |  | 0.97 | 263.846981 | 264.272727 | 3.747345 | 0.045653 | 0.9991   | 0 |
| H146 |  | 0.97 | 285.111615 | 289.384615 | 3.266563 | 0.07823  | 0.998611 | 0 |
| H147 |  | 0.97 | 246.318756 | 242.75     | 3.106195 | 0.128764 | 0.99816  | 0 |
| H149 |  | 0.97 | 320.53772  | 336.875    | 3.139284 | 0.099069 | 0.99824  | 0 |
| H150 |  | 0.97 | 232.416673 | 229.416667 | 3.419527 | 0.060584 | 0.998623 | 0 |
| CC01 |  | 0.97 | 93.548053  | 184.5      | 2.116231 | 0.203338 | 0.996754 | 0 |
| CC02 |  | 0.97 | 224.855744 | 185.928571 | 2.786594 | 0.099207 | 0.999113 | 0 |
| CC05 |  | 0.97 | 99.877718  | 103.5      | 2.369005 | 0.170926 | 0.999519 | 0 |
| CC06 |  | 0.97 | 135.172151 | 134.214286 | 2.839912 | 0.087129 | 0.999647 | 0 |
| CC08 |  | 0.97 | 160.396095 | 185.5      | 1.840324 | 0.212807 | 0.999162 | 0 |
| CC09 |  | 0.97 | 156.810259 | 165.111111 | 3.123665 | 0.073991 | 0.999113 | 0 |
| CC12 |  | 0.97 | 206.284454 | 172        | 1.298597 | 0.476826 | 0.999156 | 0 |
| CC16 |  | 0.97 | 359.089063 | 361.756757 | 2.389343 | 0.195877 | 0.998976 | 0 |
| CC17 |  | 0.97 | 420.509723 | 435.193548 | 3.744352 | 0.052089 | 0.998546 | 0 |
| CC20 |  | 0.97 | 330.86979  | 271.772727 | 2.446063 | 0.235701 | 0.998861 | 0 |
| CC21 |  | 0.97 | 227.783539 | 285.625    | 3.21246  | 0.074705 | 0.999013 | 0 |
| CC24 |  | 0.97 | 209.661513 | 206.3      | 3.076649 | 0.112787 | 0.999435 | 0 |
| CC25 |  | 0.97 | 148.734383 | 142.4      | 3.192787 | 0.077144 | 0.997288 | 0 |
| CC26 |  | 0.97 | 253.783839 | 232.058824 | 1.910883 | 0.38078  | 0.998057 | 0 |
| CC27 |  | 0.97 | 274.347223 | 273.2      | 2.876784 | 0.198279 | 0.999177 | 0 |
| CC28 |  | 0.97 | 193.953264 | 206.571429 | 2.603341 | 0.172917 | 0.997468 | 0 |
| CC29 |  | 0.97 | 233.222162 | 244.4      | 3.082322 | 0.090328 | 0.999191 | 0 |
| CC30 |  | 0.97 | 184.784746 | 193.363636 | 3.336873 | 0.057739 | 0.998894 | 0 |
| CC31 |  | 0.97 | 158.976362 | 154.473684 | 1.749152 | 0.416689 | 0.998127 | 0 |
| CC33 |  | 0.97 | 159.380981 | 163.714286 | 1.962792 | 0.283838 | 0.997912 | 0 |
| CC34 |  | 0.97 | 236.859279 | 239        | 3.742065 | 0.039216 | 0.999163 | 0 |
| CC35 |  | 0.97 | 116.518448 | 119        | 1.351468 | 0.471221 | 0.997786 | 0 |
| CC36 |  | 0.97 | 394.21791  | 388        | 3.415332 | 0.066375 | 0.998826 | 0 |
| CC37 |  | 0.97 | 184.98587  | 185.588235 | 3.218049 | 0.083311 | 0.997825 | 0 |
| CC39 |  | 0.97 | 219.480762 | 216.5      | 1.867963 | 0.341797 | 0.998802 | 0 |
| CC42 |  | 0.97 | 76.705764  | 74.875     | 2.102414 | 0.204233 | 0.999211 | 0 |
| CC43 |  | 0.97 | 280.249145 | 279.322581 | 2.582549 | 0.108935 | 0.999238 | 0 |
| CC44 |  | 0.97 | 209.654719 | 221        | 3.200669 | 0.081188 | 0.997658 | 0 |
| CC45 |  | 0.97 | 252.589181 | 250.217391 | 3.074769 | 0.167906 | 0.998327 | 0 |
| CC46 |  | 0.97 | 204.666533 | 213.235294 | 2.76316  | 0.151468 | 0.995806 | 0 |
| CC48 |  | 0.97 | 234.370303 | 172.045455 | 2.380822 | 0.130127 | 0.999063 | 0 |
| CC52 |  | 0.97 | 374.730916 | 370.025    | 3.581393 | 0.064019 | 0.999003 | 0 |
| CC54 |  | 0.97 | 162.077282 | 157.368421 | 3.188146 | 0.077193 | 0.998525 | 0 |
| CC55 |  | 0.97 | 186.911925 | 157.090909 | 2.674184 | 0.094898 | 0.999161 | 0 |
| CC57 |  | 0.97 | 373.583346 | 376.527778 | 3.546245 | 0.082613 | 0.998426 | 0 |
| CC58 |  | 0.97 | 174.956849 | 183.909091 | 2.683758 | 0.159488 | 0.9985   | 0 |
| CC60 |  | 0.97 | 174.817909 | 173.789474 | 2.376175 | 0.279075 | 0.998155 | 0 |
| CC62 |  | 0.97 | 156.291758 | 184        | 2.442547 | 0.170896 | 0.998916 | 0 |
| CC63 |  | 0.97 | 186.963668 | 179.954545 | 2.398206 | 0.252727 | 0.999197 | 0 |
| CC64 |  | 0.97 | 162.797151 | 151.857143 | 0.534513 | 0.823356 | 0.999607 | 0 |
| CC65 |  | 0.97 | 164.692947 | 159        | 1.565839 | 0.523652 | 0.9994   | 0 |
| CC67 |  | 0.97 | 194.157619 | 206.071429 | 2.157828 | 0.350896 | 0.998814 | 0 |
| CC68 |  | 0.97 | 153.334292 | 158.25     | 2.548775 | 0.175965 | 0.998262 | 0 |
| CC69 |  | 0.97 | 204.175102 | 172.565217 | 2.524762 | 0.164252 | 0.998912 | 0 |
| CC70 |  | 0.97 | 217.885295 | 218        | 2.544308 | 0.216642 | 0.999238 | 0 |
| CC71 |  | 0.97 | 171.293375 | 166        | 2.951642 | 0.096332 | 0.999509 | 0 |
| CC72 |  | 0.97 | 228.824827 | 229        | 3.467724 | 0.062081 | 0.998962 | 0 |
| CC73 |  | 0.97 | 174.086289 | 170.555556 | 2.322144 | 0.218192 | 0.99919  | 0 |















| H067     | H063     | H137     | H147     | H097     | H102     | H123     | H048     | H017     | H146     | H074     | H004     | ID...96      | CC64     |
|----------|----------|----------|----------|----------|----------|----------|----------|----------|----------|----------|----------|--------------|----------|
| 0.141097 | 0.13146  | 0.129329 | 0.12534  | 0.124133 | 0.118435 | 0.11023  | 0.107126 | 0.097391 | 0.093929 | 0.072816 | 0.048721 | Firmicutes   | 0.989153 |
| 0.262916 | 0.148703 | 0.26049  | 0.236947 | 0.264504 | 0.299742 | 0.241301 | 0.213957 | 0.159908 | 0.458718 | 0.323064 | 0.220959 | Bacteroidot  | 0.003404 |
| 0.383759 | 0.571576 | 0.423048 | 0.429501 | 0.434846 | 0.364875 | 0.476419 | 0.52105  | 0.637591 | 0.130601 | 0.381905 | 0.582502 | Proteobacte  | 0.004168 |
| 0.154644 | 0.055144 | 0.147918 | 0.149702 | 0.099854 | 0.159775 | 0.083794 | 0.045239 | 0.064596 | 0.196918 | 0.177516 | 0.078261 | Fusobacteri  | 0.001397 |
| 0.036924 | 0.06703  | 0.016171 | 0.029619 | 0.033284 | 0.014199 | 0.045888 | 0.099558 | 0.02356  | 0.044845 | 0.010209 | 0.03181  | Actinobacte  | 0.001412 |
| 0.013325 | 0.017935 | 0.014887 | 0.019169 | 0.035365 | 0.020476 | 0.030227 | 0.006823 | 0.01072  | 0.066554 | 0.023081 | 0.033097 | Patescibact  | 3.64E-04 |
| 0.00578  | 0.005912 | 0.006355 | 0.007729 | 0.007362 | 0.020161 | 0.009784 | 0.002619 | 0.001916 | 0.008363 | 0.009374 | 0.00386  | Campilobac   | 5.50E-05 |
| 0.001037 | 0.001775 | 0.001521 | 0.001787 | 5.18E-04 | 0.002305 | 0.001955 | 0.00221  | 0.003832 | 0        | 0.001828 | 6.80E-04 | Spirochaeto  | 2.50E-05 |
| 3.75E-04 | 2.71E-04 | 2.61E-04 | 2.06E-04 | 1.34E-04 | 3.20E-05 | 3.01E-04 | 0.00113  | 3.69E-04 | 0        | 2.07E-04 | 8.80E-05 | Synergistota | 0        |
| 1.43E-04 | 0        | 2.00E-05 | 0        | 0        | 0        | 0        | 2.88E-04 | 1.17E-04 | 2.70E-05 | 0        | 0        | Desulfobact  | 0        |
| 0        | 0        | 0        | 0        | 0        | 0        | 0        | 0        | 0        | 0        | 0        | 0        | Deferribact  | 0        |
| 0        | 1.94E-04 | 0        | 0        | 0        | 0        | 3.10E-05 | 0        | 0        | 0        | 0        | 0        | Cyanobacte   | 0        |
| 0        | 0        | 0        | 0        | 0        | 0        | 4.80E-05 | 0        | 0        | 4.50E-05 | 0        | 0        | Verrucomic   | 0        |
| 0        | 0        | 0        | 0        | 0        | 0        | 0        | 0        | 0        | 0        | 0        | 0        | Bacteria_un  | 2.20E-05 |
| 0        | 0        | 0        | 0        | 0        | 0        | 0        | 0        | 0        | 0        | 0        | 0        | Deinococco   | 0        |
| 0        | 0        | 0        | 0        | 0        | 0        | 0        | 0        | 0        | 0        | 0        | 0        | Chloroflexi  | 0        |
| 0        | 0        | 0        | 0        | 0        | 0        | 2.20E-05 | 0        | 0        | 0        | 0        | 2.20E-05 | Elusimicrob  | 0        |
| 0        | 0        | 0        | 0        | 0        | 0        | 0        | 0        | 0        | 0        | 0        | 0        | Planctomyc   | 0        |







| CC60     | CC65     | CC31     | CC73     | CC35     |
|----------|----------|----------|----------|----------|
| 0.108681 | 0.095131 | 0.063811 | 0.063084 | 0.019632 |
| 0.100983 | 0.034034 | 0.134971 | 0.043338 | 0.877624 |
| 0.026721 | 0.785831 | 0.003531 | 0.781265 | 0.002412 |
| 0.75545  | 0.06638  | 0.77802  | 0.095063 | 0.001526 |
| 0.005247 | 0.013591 | 0.01732  | 0.010149 | 0.0978   |
| 0.001759 | 0.004518 | 0.001081 | 0.001844 | 4.40E-04 |
| 7.23E-04 | 2.36E-04 | 0.001016 | 0.005207 | 5.66E-04 |
| 3.30E-04 | 0        | 2.50E-04 | 5.00E-05 | 0        |
| 1.06E-04 | 0        | 0        | 0        | 0        |
| 0        | 0        | 0        | 0        | 0        |
| 0        | 0        | 0        | 0        | 0        |
| 0        | 0        | 0        | 0        | 0        |
| 0        | 0        | 0        | 0        | 0        |
| 0        | 2.79E-04 | 0        | 0        | 0        |
| 0        | 0        | 0        | 0        | 0        |
| 0        | 0        | 0        | 0        | 0        |
| 0        | 0        | 0        | 0        | 0        |
| 0        | 0        | 0        | 0        | 0        |



**Table S3 .The abundance and composition at the genus level of each sample**

| ID                            | H017     | H024     | H063     | H149     | H147     | H097     | H027     | H048     | H137     | H004     | H064     |
|-------------------------------|----------|----------|----------|----------|----------|----------|----------|----------|----------|----------|----------|
| Neisseria                     | 0.592341 | 0.487396 | 0.427697 | 0.407569 | 0.378587 | 0.375387 | 0.366007 | 0.364857 | 0.351371 | 0.348748 | 0.345873 |
| Prevotella                    | 0.059092 | 0.100076 | 0.012221 | 0.02978  | 0.071873 | 0.111644 | 0.084919 | 0.11817  | 0.083403 | 0.054648 | 0.132146 |
| Streptococcus                 | 0.025139 | 0.01569  | 0.074578 | 0.158869 | 0.032215 | 0.014999 | 0.033665 | 0.045466 | 0.036809 | 0.010835 | 0.050375 |
| Veillonella                   | 0.029849 | 0.073451 | 0.005236 | 0.014336 | 0.037441 | 0.046353 | 0.015317 | 0.017868 | 0.034378 | 0.009426 | 0.051611 |
| Leptotrichia                  | 0.013513 | 0.020762 | 0.019473 | 0.017147 | 0.019427 | 0.039369 | 0.009573 | 0.002477 | 0.036458 | 0.011289 | 0.029468 |
| Fusobacterium                 | 0.051083 | 0.001311 | 0.035671 | 0.05407  | 0.130275 | 0.060485 | 0.019286 | 0.042734 | 0.11146  | 0.065947 | 0.113212 |
| Alloprevotella                | 0.023144 | 0.049278 | 0.015376 | 0.008225 | 0.045055 | 0.060652 | 0.031339 | 0.0143   | 0.045153 | 0.051446 | 0.031686 |
| Porphyromonas                 | 0.062731 | 0.005937 | 0.078401 | 0.050498 | 0.078587 | 0.039031 | 0.06451  | 0.06468  | 0.077807 | 0.07496  | 0.018717 |
| Haemophilus                   | 0.037641 | 0.006796 | 0.070354 | 0.093558 | 0.039897 | 0.042977 | 0.035072 | 0.141334 | 0.048534 | 0.060807 | 0.07313  |
| Actinomyces                   | 0.009407 | 0.006377 | 0.019444 | 0.012973 | 0.014498 | 0.018887 | 0.012263 | 0.014297 | 0.00997  | 0.003662 | 0.010843 |
| Rothia                        | 0.004014 | 0.001558 | 0.036355 | 0.015289 | 0.013771 | 0.012381 | 0.017571 | 0.082465 | 0.003597 | 0.027796 | 0.007186 |
| Capnocytophaga                | 0.010417 | 0.006893 | 0.033672 | 0.013489 | 0.039021 | 0.047785 | 0.023143 | 0.011365 | 0.047469 | 0.035214 | 0.046566 |
| Gemella                       | 0.002706 | 6.48E-04 | 0.005705 | 0.006465 | 0.002295 | 5.90E-04 | 0.001921 | 0.00864  | 0.004112 | 5.96E-04 | 0.001762 |
| TM7x                          | 0.002855 | 0.005644 | 0.003148 | 0.001067 | 0.010906 | 0.019467 | 0.002562 | 0.001794 | 0.002765 | 0.002307 | 0.001035 |
| Lachnoanaerobaculum           | 0.004089 | 0.004048 | 0.001862 | 0.002667 | 0.010999 | 0.00925  | 0.002987 | 0.004799 | 0.01069  | 0.005544 | 0.015475 |
| Campylobacter                 | 0.001916 | 0.002362 | 0.005912 | 0.004948 | 0.007729 | 0.007362 | 0.005665 | 0.002619 | 0.006355 | 0.00386  | 0.007304 |
| Granulicatella                | 0.007609 | 0.004525 | 0.02586  | 0.019562 | 0.008173 | 0.002173 | 0.005463 | 0.007037 | 0.003749 | 0.009324 | 0.007687 |
| Actinobacillus                | 1.03E-04 | 0.001087 | 0.002558 | 0.019316 | 0.003222 | 0.001533 | 3.58E-04 | 6.00E-05 | 0.00594  | 2.18E-04 | 0.007635 |
| g_Absconditabacteriales_      | 0.002632 | 6.78E-04 | 0.006455 | 0.001623 | 0.004047 | 0.012491 | 0.034298 | 0.001353 | 0.008419 | 0.00707  | 1.20E-04 |
| Lautropia                     | 0.001939 | 0.001915 | 0.031781 | 0.002159 | 8.47E-04 | 0.002267 | 0.006872 | 0.001502 | 0.005633 | 0.002374 | 2.60E-05 |
| Bacteroides                   | 1.69E-04 | 0.001639 | 2.94E-04 | 3.29E-04 | 0        | 1.12E-04 | 0.009605 | 7.60E-05 | 6.80E-05 | 1.86E-04 | 2.67E-04 |
| Oribacterium                  | 0.003347 | 0.002013 | 9.64E-04 | 0.001569 | 0.003645 | 0.008616 | 0.00125  | 0.002199 | 0.005343 | 0.00192  | 0.004862 |
| Pseudomonas                   | 1.41E-04 | 3.40E-05 | 0.002866 | 0.001667 | 1.69E-04 | 2.32E-04 | 0.002062 | 0.001041 | 5.48E-04 | 7.38E-04 | 6.84E-04 |
| Megasphaera                   | 4.16E-04 | 4.70E-05 | 0        | 0        | 5.10E-05 | 3.17E-04 | 8.59E-04 | 8.33E-04 | 0.001262 | 0        | 6.20E-04 |
| Stomatobaculum                | 0.001561 | 0        | 4.60E-05 | 5.12E-04 | 0.001261 | 8.04E-04 | 6.40E-04 | 5.12E-04 | 0.003894 | 1.01E-04 | 0.007112 |
| Selenomonas                   | 0.004515 | 9.87E-04 | 3.05E-04 | 3.20E-04 | 5.15E-04 | 0.01268  | 6.34E-04 | 4.73E-04 | 0.002413 | 1.70E-05 | 0.001429 |
| Peptostreptococcus            | 0.001937 | 0        | 7.19E-04 | 8.05E-04 | 0.004227 | 0.002023 | 7.49E-04 | 0.002503 | 0.002235 | 0.001464 | 0.002865 |
| Moraxella                     | 0        | 0.003258 | 0        | 4.54E-04 | 5.83E-04 | 0        | 0        | 0        | 0        | 0.143582 | 0        |
| Solobacterium                 | 0.002598 | 0.003916 | 2.77E-04 | 8.48E-04 | 0.002304 | 0.003644 | 0.003829 | 0.002916 | 0.003066 | 0.001971 | 0.001367 |
| Clostridia_UCG-014            | 7.41E-04 | 0.002803 | 0.001722 | 0.002187 | 0.004831 | 0.005542 | 0.004248 | 5.94E-04 | 0.002481 | 8.63E-04 | 5.54E-04 |
| Aggregatibacter               | 0.003089 | 0.002637 | 0.008065 | 0.007188 | 0.00291  | 0.010143 | 3.55E-04 | 0.008115 | 0.008318 | 2.63E-04 | 3.17E-04 |
| Faecalibacterium              | 3.20E-05 | 2.50E-05 | 2.21E-04 | 3.20E-05 | 5.10E-05 | 0        | 0.004606 | 0        | 0        | 1.69E-04 | 4.60E-05 |
| Lachnospiraceae_uncultured    | 2.70E-04 | 0.001154 | 0        | 2.08E-04 | 1.32E-04 | 0.008508 | 8.44E-04 | 6.10E-05 | 0.001474 | 2.06E-04 | 0        |
| Corynebacterium               | 0.007398 | 0.001056 | 0.010211 | 9.85E-04 | 5.30E-04 | 2.24E-04 | 0.001142 | 0.001556 | 4.70E-04 | 2.74E-04 | 1.57E-04 |
| Halomonas                     | 3.40E-05 | 0        | 1.34E-04 | 1.44E-04 | 0        | 0        | 1.63E-04 | 2.13E-04 | 0        | 4.10E-05 | 8.70E-05 |
| Muribaculaceae                | 4.00E-05 | 0.041873 | 4.10E-05 | 0        | 0        | 0        | 0.060398 | 9.00E-05 | 0        | 2.20E-05 | 0        |
| Tannerella                    | 0.002436 | 0        | 0.001326 | 0.002711 | 0.00162  | 0.001407 | 4.56E-04 | 0.001187 | 0.003987 | 1.61E-04 | 0.001377 |
| [Eubacterium]_nodatum_group   | 0.001749 | 0.001819 | 5.45E-04 | 0.002012 | 0.002475 | 0.001942 | 3.06E-04 | 0.002817 | 0.003293 | 7.05E-04 | 0.003086 |
| Atopobium                     | 5.47E-04 | 0.002521 | 9.40E-05 | 9.80E-05 | 5.57E-04 | 0.001792 | 6.17E-04 | 9.62E-04 | 0.001994 | 1.90E-05 | 6.91E-04 |
| Treponema                     | 0.003832 | 4.50E-05 | 0.001775 | 0.005021 | 0.001787 | 5.18E-04 | 1.16E-04 | 0.00221  | 0.001521 | 6.80E-04 | 0.001439 |
| Lachnospiraceae_unclassified  | 1.42E-04 | 0.030147 | 1.05E-04 | 3.30E-05 | 4.30E-05 | 0        | 0.029084 | 3.00E-05 | 3.00E-05 | 4.40E-05 | 7.00E-05 |
| Neisseriaceae_unclassified    | 4.43E-04 | 3.81E-04 | 0.023133 | 0.003488 | 0.001615 | 4.52E-04 | 8.28E-04 | 0.001982 | 0.001294 | 0.02331  | 0.001518 |
| Saccharimonadales             | 0.002661 | 0.003747 | 0.003637 | 9.74E-04 | 6.61E-04 | 8.50E-04 | 0.001011 | 6.31E-04 | 0.002177 | 2.08E-04 | 8.50E-05 |
| Abiotrophia                   | 3.30E-04 | 4.90E-05 | 0.004179 | 1.33E-04 | 1.35E-04 | 0        | 1.94E-04 | 9.90E-05 | 6.35E-04 | 2.50E-05 | 0        |
| Rhodococcus                   | 0        | 0        | 1.66E-04 | 0        | 0        | 0        | 0.001484 | 0        | 0        | 0        | 1.90E-05 |
| Parvimonas                    | 0.002292 | 0        | 0.00121  | 0.001394 | 0.00224  | 3.92E-04 | 0        | 0.001463 | 0.002465 | 8.84E-04 | 0.003639 |
| Johnsonella                   | 6.30E-05 | 6.30E-05 | 0.001774 | 7.11E-04 | 0.003696 | 0.001341 | 0        | 3.00E-05 | 0.005188 | 7.26E-04 | 0.004791 |
| Fusicatenibacter              | 3.00E-05 | 3.70E-05 | 2.30E-05 | 0        | 4.70E-05 | 0        | 0.002083 | 0        | 0        | 5.10E-05 | 0        |
| Lachnospiraceae_NK4A136_group | 0        | 0.027696 | 6.30E-05 | 1.02E-04 | 0        | 0        | 0.018859 | 0        | 0        | 3.20E-05 | 0        |
| Lactobacillales_unclassified  | 3.57E-04 | 7.70E-05 | 2.95E-04 | 0.001749 | 1.36E-04 | 7.00E-05 | 3.60E-05 | 0.001299 | 1.48E-04 | 4.40E-05 | 0        |
| F0332                         | 0.002169 | 3.68E-04 | 2.95E-04 | 1.31E-04 | 1.36E-04 | 0        | 0        | 1.63E-04 | 5.30E-05 | 1.90E-05 | 3.33E-04 |
| Bergeyella                    | 5.21E-04 | 3.90E-05 | 0.006663 | 0.003374 | 4.73E-04 | 4.67E-04 | 0.001385 | 0.001439 | 6.12E-04 | 0.003322 | 0.001011 |
| Filifactor                    | 0.001709 | 1.39E-04 | 0.001384 | 0.003574 | 0.00244  | 3.22E-04 | 0        | 0.002138 | 9.10E-04 | 4.44E-04 | 0.001105 |
| Dialister                     | 9.62E-04 | 0        | 0        | 7.14E-04 | 6.30E-04 | 4.10E-05 | 8.60E-05 | 8.26E-04 | 1.47E-04 | 5.00E-05 | 1.61E-04 |
| P5D1-392                      | 1.09E-04 | 1.36E-04 | 0        | 3.58E-04 | 3.50E-04 | 1.31E-04 | 0        | 5.50E-05 | 1.76E-04 | 0        | 1.46E-04 |

|                                 |          |          |          |          |          |          |          |          |          |          |          |
|---------------------------------|----------|----------|----------|----------|----------|----------|----------|----------|----------|----------|----------|
| Saccharimonadaceae              | 5.57E-04 | 1.93E-04 | 5.99E-04 | 2.89E-04 | 7.80E-05 | 0        | 2.29E-04 | 4.64E-04 | 6.30E-05 | 0        | 0        |
| Acinetobacter                   | 0        | 0        | 2.43E-04 | 1.05E-04 | 0        | 0        | 0.00202  | 6.10E-05 | 3.10E-05 | 1.01E-04 | 1.04E-04 |
| Kingella                        | 1.86E-04 | 0        | 2.90E-05 | 0        | 0        | 0        | 7.90E-05 | 5.10E-05 | 0        | 0        | 3.30E-05 |
| Sphingomonas                    | 0        | 0        | 6.20E-05 | 0        | 0        | 0        | 6.27E-04 | 0        | 0        | 0        | 2.60E-05 |
| Bifidobacterium                 | 0        | 4.40E-05 | 6.20E-05 | 0        | 0        | 0        | 6.76E-04 | 3.60E-05 | 0        | 0        | 2.30E-05 |
| Leptotrichiaceae_uncultured     | 0        | 0        | 0        | 0        | 0        | 0        | 0        | 2.80E-05 | 0        | 0.001025 | 0        |
| Megamonas                       | 0        | 0        | 4.50E-05 | 0        | 0        | 3.00E-05 | 6.29E-04 | 5.40E-05 | 0        | 2.00E-05 | 2.50E-05 |
| Burkholderiales_unclassified    | 5.57E-04 | 5.06E-04 | 0        | 8.40E-04 | 3.41E-04 | 3.78E-04 | 0        | 5.73E-04 | 3.28E-04 | 0        | 4.54E-04 |
| Selenomonadaceae_uncultured     | 6.50E-05 | 0        | 0        | 2.70E-05 | 0        | 0        | 0        | 2.60E-05 | 0        | 0        | 0        |
| [Eubacterium]_ruminantium_group | 0        | 0        | 4.50E-05 | 0        | 0        | 0        | 7.33E-04 | 0        | 0        | 2.50E-05 | 0        |
| Helicobacter                    | 0        | 0.002628 | 0        | 0        | 0        | 0        | 0.001143 | 0        | 0        | 0        | 0        |
| Christensenellaceae_R-7_group   | 0        | 0        | 1.76E-04 | 0        | 0        | 0        | 5.35E-04 | 0        | 0        | 1.20E-04 | 2.50E-05 |
| Lactobacillus                   | 0        | 0.002741 | 2.40E-05 | 0        | 0        | 0        | 8.65E-04 | 0        | 0        | 0        | 0        |
| Phascolarctobacterium           | 0        | 0        | 2.30E-05 | 0        | 0        | 0        | 3.89E-04 | 0        | 0        | 0        | 0        |
| Agathobacter                    | 0        | 4.90E-05 | 0        | 0        | 0        | 4.90E-05 | 4.65E-04 | 0        | 0        | 0        | 2.10E-05 |
| Gracilibacteria                 | 0.001062 | 0        | 0.003656 | 5.72E-04 | 0        | 8.30E-05 | 3.40E-04 | 1.53E-04 | 2.98E-04 | 0.022938 | 0        |
| Prevotellaceae_NK3B31_group     | 0        | 0.005545 | 0        | 0        | 0        | 0        | 0.004119 | 0        | 0        | 0        | 0        |
| Mucispirillum                   | 0        | 3.33E-04 | 0        | 0        | 0        | 0        | 5.28E-04 | 0        | 0        | 0        | 0        |
| Serratia                        | 0        | 0        | 1.22E-04 | 9.90E-05 | 0        | 0        | 0        | 0        | 2.40E-05 | 2.00E-05 | 2.20E-05 |
| Acidovorax                      | 0        | 0        | 2.10E-05 | 0        | 0        | 0        | 4.27E-04 | 0        | 0        | 0        | 0        |
| Propionibacterium               | 0        | 0        | 0        | 0        | 0        | 0        | 0        | 0        | 0        | 0        | 0        |
| Others                          | 0.008713 | 0.062823 | 0.010602 | 0.020633 | 0.010466 | 0.011807 | 0.065476 | 0.012224 | 0.008982 | 0.007139 | 0.007572 |

| H075     | H013     | H074     | H067     | H086     | H083     | H084     | H057     | H109     | H049     | H020     | H093     | H070     | H150     |
|----------|----------|----------|----------|----------|----------|----------|----------|----------|----------|----------|----------|----------|----------|
| 0.34477  | 0.335146 | 0.308855 | 0.304995 | 0.292092 | 0.288331 | 0.285485 | 0.27495  | 0.273822 | 0.272606 | 0.27238  | 0.270214 | 0.268633 | 0.268449 |
| 0.066309 | 0.211452 | 0.088822 | 0.176947 | 0.141431 | 0.155242 | 0.048372 | 0.218746 | 0.111531 | 0.069611 | 0.116189 | 0.173611 | 0.117945 | 0.210015 |
| 0.077125 | 0.033248 | 0.011615 | 0.027529 | 0.046936 | 0.056098 | 0.136063 | 0.044886 | 0.0746   | 0.034759 | 0.058699 | 0.070059 | 0.116401 | 0.081533 |
| 0.010792 | 0.058267 | 0.021017 | 0.053197 | 0.032731 | 0.043858 | 0.012699 | 0.070345 | 0.051644 | 0.04339  | 0.053242 | 0.066035 | 0.035009 | 0.08946  |
| 0.004879 | 0.026779 | 0.028198 | 0.042336 | 0.021794 | 0.021705 | 0.007292 | 0.034352 | 0.014956 | 0.019731 | 0.021175 | 0.023664 | 0.107391 | 0.016506 |
| 0.037398 | 0.09898  | 0.149318 | 0.112308 | 0.079995 | 0.081541 | 0.066099 | 0.064843 | 0.072631 | 0.098793 | 0.06863  | 0.072551 | 0.023398 | 0.042652 |
| 0.029289 | 0.076226 | 0.060005 | 0.057173 | 0.077572 | 0.035891 | 0.030374 | 0.017874 | 0.116978 | 0.021466 | 0.099695 | 0.043677 | 0.015942 | 0.063454 |
| 0.083228 | 0.033342 | 0.072737 | 0.021185 | 0.078018 | 0.084547 | 0.061623 | 0.010783 | 0.071982 | 0.099656 | 0.045598 | 0.106271 | 0.01832  | 0.037148 |
| 0.090715 | 0.021981 | 0.063188 | 0.066784 | 0.021575 | 0.079797 | 0.077275 | 0.035488 | 0.043221 | 0.056453 | 0.031683 | 0.053471 | 0.146818 | 0.024823 |
| 0.002265 | 0.01017  | 0.004304 | 0.028517 | 0.012644 | 0.012585 | 0.00672  | 0.029663 | 0.019118 | 0.013356 | 0.040976 | 0.009362 | 0.016457 | 0.030365 |
| 0.015027 | 0.003614 | 0.005322 | 0.006175 | 0.009934 | 0.011228 | 0.008468 | 0.022074 | 0.008271 | 0.014498 | 0.037663 | 0.007152 | 0.016868 | 0.02271  |
| 0.008212 | 8.82E-04 | 0.095981 | 0.00436  | 0.024963 | 0.012295 | 0.017579 | 0.017403 | 0.009668 | 0.076725 | 0.009068 | 0.026068 | 0.004473 | 0.00478  |
| 0.027507 | 0.001573 | 0.003131 | 0.002499 | 0.003538 | 0.006615 | 0.012608 | 0.002921 | 0.012744 | 0.008068 | 0.005209 | 0.002491 | 0.024116 | 0.002371 |
| 0.003571 | 0.002706 | 0.009461 | 0.010575 | 0.014712 | 0.007377 | 0.001031 | 0.008069 | 0.004742 | 0.014527 | 0.016805 | 0.005977 | 0.002557 | 0.007545 |
| 0.003007 | 0.00936  | 0.008835 | 0.013628 | 0.011726 | 0.010652 | 0.001774 | 0.010579 | 0.006091 | 0.008659 | 0.00951  | 0.009591 | 0.005892 | 0.00803  |
| 0.002965 | 0.004673 | 0.009374 | 0.005703 | 0.013464 | 0.004265 | 0.00398  | 0.033291 | 0.002587 | 0.017643 | 0.011171 | 0.004662 | 0.008809 | 0.006138 |
| 0.006062 | 0.004047 | 0.003795 | 0.003817 | 0.008827 | 0.007683 | 0.003707 | 0.004837 | 0.015748 | 0.008692 | 0.005437 | 0.004901 | 0.00406  | 0.020166 |
| 0.071346 | 0.001533 | 2.21E-04 | 0.004509 | 5.27E-04 | 8.90E-05 | 0.137301 | 0.002364 | 0.005022 | 2.00E-05 | 0.002495 | 0.001542 | 3.60E-05 | 0        |
| 0.009703 | 0.003057 | 0.008478 | 5.19E-04 | 0.010037 | 0.006262 | 0.004323 | 0.023067 | 0.015524 | 0.014069 | 0.002273 | 0.008087 | 2.37E-04 | 0.007682 |
| 8.34E-04 | 5.10E-05 | 0.002907 | 0.004138 | 0.001374 | 0.001373 | 0.003815 | 0.002053 | 5.77E-04 | 2.92E-04 | 0.001277 | 1.91E-04 | 0.006026 | 1.91E-04 |
| 5.93E-04 | 0        | 9.30E-05 | 3.81E-04 | 1.08E-04 | 0.00175  | 0.00132  | 4.63E-04 | 1.34E-04 | 7.34E-04 | 0.001231 | 3.80E-05 | 1.21E-04 | 0        |
| 7.58E-04 | 0.003176 | 0.00116  | 0.005189 | 0.0045   | 0.006613 | 0.001536 | 0.005331 | 0.001199 | 0.002739 | 0.002506 | 0.001885 | 0.003407 | 0.0049   |
| 0.042187 | 0        | 1.11E-04 | 7.47E-04 | 0.001011 | 0.001052 | 0.006649 | 7.53E-04 | 9.36E-04 | 0.003494 | 0.001557 | 1.99E-04 | 8.46E-04 | 2.96E-04 |
| 1.92E-04 | 0.010542 | 0        | 7.35E-04 | 0        | 1.66E-04 | 7.44E-04 | 0.003152 | 4.50E-05 | 3.90E-05 | 0.001594 | 0.001304 | 0.004117 | 0.003658 |
| 9.10E-05 | 0.006193 | 5.51E-04 | 0.003524 | 0.001788 | 0.008773 | 8.43E-04 | 0.002054 | 0.001486 | 0.003417 | 9.02E-04 | 0.002144 | 0.00198  | 0.006166 |
| 4.81E-04 | 0.001276 | 7.04E-04 | 0.002855 | 9.58E-04 | 3.26E-04 | 3.12E-04 | 0.006323 | 8.00E-05 | 0.001324 | 2.20E-04 | 0.001279 | 0.010001 | 0.00151  |
| 9.38E-04 | 0.003246 | 0.002345 | 0.005852 | 0.005757 | 0.00328  | 0.002065 | 0.005403 | 0.005101 | 0.004392 | 0.002354 | 0.001892 | 0.00102  | 0.00224  |
| 0        | 5.07E-04 | 0        | 3.30E-05 | 0        | 0        | 1.14E-04 | 0        | 0.023914 | 0        | 0        | 6.80E-05 | 3.50E-05 | 0        |
| 0.001007 | 0.003021 | 0.001477 | 0.002238 | 0.005287 | 0.003506 | 8.36E-04 | 0.005833 | 0.003482 | 0.00217  | 0.004391 | 0.002994 | 0.002325 | 0.006466 |
| 6.29E-04 | 0.003762 | 0.002422 | 1.95E-04 | 0.004602 | 0.002236 | 6.78E-04 | 0.007501 | 0.001074 | 4.58E-04 | 0.006216 | 0.004263 | 0.002198 | 0.001588 |
| 0.001726 | 6.07E-04 | 8.59E-04 | 6.88E-04 | 0.00255  | 0.010767 | 0.003745 | 5.66E-04 | 0.002282 | 1.59E-04 | 0.003466 | 8.43E-04 | 0.003216 | 3.62E-04 |
| 4.08E-04 | 0        | 0        | 4.30E-05 | 2.70E-05 | 3.39E-04 | 8.76E-04 | 2.38E-04 | 7.40E-05 | 4.54E-04 | 9.24E-04 | 9.80E-05 | 7.20E-05 | 0        |
| 1.79E-04 | 0.00138  | 0        | 6.38E-04 | 0.001872 | 1.21E-04 | 6.41E-04 | 0        | 1.58E-04 | 5.48E-04 | 8.65E-04 | 0.001268 | 0.003989 | 0.003343 |
| 0.002497 | 9.10E-05 | 0        | 7.15E-04 | 0.001262 | 0.001766 | 4.63E-04 | 0.001508 | 0.001365 | 6.30E-04 | 0.004008 | 2.28E-04 | 0.003456 | 7.00E-05 |
| 0.002942 | 0        | 0        | 1.06E-04 | 1.81E-04 | 6.40E-05 | 3.12E-04 | 7.70E-05 | 3.60E-05 | 1.68E-04 | 1.13E-04 | 0        | 3.00E-05 | 0        |
| 6.10E-05 | 3.80E-05 | 0        | 0        | 0        | 0        | 5.60E-05 | 3.00E-05 | 0        | 6.20E-05 | 6.60E-05 | 0        | 0        | 0        |
| 3.19E-04 | 0.004962 | 0.001464 | 8.92E-04 | 0.004019 | 0.00246  | 0.003785 | 0.004195 | 0.002102 | 0.007013 | 0.002409 | 0.00225  | 7.01E-04 | 6.90E-04 |
| 5.87E-04 | 0.006018 | 5.38E-04 | 0.004537 | 0.004353 | 0.001584 | 0.001146 | 0.002487 | 0.001757 | 0.00261  | 0.001961 | 0.001244 | 6.75E-04 | 0.00297  |
| 9.60E-05 | 0.002167 | 5.13E-04 | 0.001146 | 0.001579 | 5.69E-04 | 3.14E-04 | 0.001571 | 6.61E-04 | 8.26E-04 | 0.003141 | 0.001366 | 5.96E-04 | 0.002709 |
| 0.005955 | 6.72E-04 | 0.001828 | 0.001037 | 0.004194 | 0.001914 | 0.00435  | 3.79E-04 | 5.12E-04 | 0.01513  | 0.001904 | 3.98E-04 | 7.17E-04 | 2.20E-04 |
| 1.18E-04 | 0        | 3.20E-05 | 0        | 3.12E-04 | 2.76E-04 | 2.63E-04 | 1.18E-04 | 1.55E-04 | 2.93E-04 | 1.71E-04 | 0        | 4.20E-05 | 3.10E-05 |
| 0.00145  | 1.00E-04 | 0.0039   | 1.07E-04 | 0.002355 | 0.001126 | 7.96E-04 | 0.001225 | 2.18E-04 | 6.09E-04 | 2.25E-04 | 4.11E-04 | 6.33E-04 | 9.30E-05 |
| 0.001603 | 3.10E-04 | 0.00376  | 5.30E-04 | 0.002796 | 6.50E-05 | 3.58E-04 | 4.51E-04 | 0.003235 | 2.05E-04 | 0.004016 | 0.004984 | 1.55E-04 | 0.009431 |
| 1.07E-04 | 0        | 8.50E-05 | 0        | 6.90E-05 | 9.30E-05 | 0.002173 | 1.54E-04 | 9.14E-04 | 0        | 2.28E-04 | 1.08E-04 | 2.38E-04 | 0        |
| 2.30E-04 | 0        | 0        | 1.35E-04 | 3.00E-05 | 2.10E-05 | 5.43E-04 | 1.40E-04 | 6.20E-05 | 2.73E-04 | 2.19E-04 | 4.00E-05 | 0        | 0        |
| 7.00E-04 | 0.002446 | 0.003009 | 7.27E-04 | 0.008582 | 0.001956 | 0.001149 | 0.001176 | 0.003287 | 0.004924 | 0.002138 | 5.85E-04 | 3.70E-05 | 2.66E-04 |
| 3.10E-04 | 9.00E-05 | 0.004456 | 0.00237  | 0.003409 | 0.003308 | 0.001402 | 1.45E-04 | 0.001507 | 0.00577  | 0.001234 | 0.001012 | 3.60E-05 | 6.60E-05 |
| 2.30E-04 | 0        | 0        | 0        | 2.30E-05 | 9.10E-05 | 2.58E-04 | 1.76E-04 | 0        | 1.93E-04 | 3.88E-04 | 0        | 0        | 0        |
| 7.50E-05 | 0        | 0        | 0        | 0        | 2.10E-05 | 2.10E-05 | 4.90E-05 | 0        | 4.70E-05 | 4.60E-05 | 0        | 0        | 0        |
| 0.002949 | 9.41E-04 | 6.80E-05 | 0        | 9.20E-05 | 7.60E-05 | 0.017471 | 1.80E-04 | 6.30E-04 | 0        | 0.001633 | 3.46E-04 | 0.010617 | 0        |
| 2.80E-05 | 4.00E-05 | 0        | 7.60E-05 | 3.07E-04 | 2.61E-04 | 3.36E-04 | 2.05E-04 | 3.51E-04 | 1.12E-04 | 0.001254 | 5.70E-05 | 3.91E-04 | 0        |
| 0.002779 | 2.80E-04 | 0.003384 | 5.47E-04 | 0.002138 | 8.58E-04 | 0.001874 | 0.002846 | 7.52E-04 | 0.001695 | 0.001366 | 8.68E-04 | 7.57E-04 | 1.67E-04 |
| 0.001401 | 0.001739 | 0.002404 | 0.001639 | 0.004055 | 0.002392 | 0.002292 | 2.96E-04 | 0.002052 | 0.012665 | 4.14E-04 | 2.35E-04 | 0        | 5.80E-05 |
| 9.70E-04 | 3.28E-04 | 2.69E-04 | 5.48E-04 | 2.05E-04 | 3.95E-04 | 3.99E-04 | 8.82E-04 | 6.58E-04 | 4.33E-04 | 1.77E-04 | 3.92E-04 | 1.60E-04 | 1.33E-04 |
| 0        | 1.29E-04 | 2.60E-05 | 8.70E-05 | 2.26E-04 | 1.93E-04 | 0        | 0        | 3.99E-04 | 0        | 0        | 9.44E-04 | 1.84E-04 | 3.99E-04 |

|          |          |          |          |          |          |          |          |          |          |          |          |          |          |
|----------|----------|----------|----------|----------|----------|----------|----------|----------|----------|----------|----------|----------|----------|
| 3.01E-04 | 0        | 3.50E-05 | 3.48E-04 | 2.44E-04 | 2.25E-04 | 2.50E-05 | 1.36E-04 | 3.30E-04 | 6.70E-05 | 0.022573 | 2.41E-04 | 0.001203 | 2.80E-05 |
| 0.002173 | 5.30E-05 | 0        | 0        | 4.90E-05 | 7.40E-05 | 4.63E-04 | 1.88E-04 | 3.90E-05 | 3.35E-04 | 3.31E-04 | 3.80E-05 | 8.80E-05 | 6.00E-05 |
| 2.30E-05 | 0        | 0        | 3.60E-05 | 1.98E-04 | 2.40E-05 | 1.28E-04 | 2.00E-05 | 7.50E-05 | 4.80E-05 | 2.21E-04 | 0        | 1.04E-04 | 8.20E-05 |
| 1.85E-04 | 0        | 0        | 0        | 0        | 0        | 4.36E-04 | 8.10E-05 | 0        | 3.77E-04 | 2.10E-04 | 0        | 0        | 0        |
| 1.14E-04 | 0        | 3.70E-05 | 0        | 0        | 2.30E-05 | 8.80E-05 | 2.88E-04 | 7.20E-05 | 6.40E-05 | 1.02E-04 | 3.60E-05 | 4.10E-05 | 0        |
| 0        | 0        | 0        | 0        | 0        | 0        | 0        | 0        | 4.79E-04 | 0        | 0        | 0        | 0        | 0        |
| 8.40E-05 | 0        | 3.10E-05 | 0        | 0        | 4.20E-05 | 7.80E-05 | 6.40E-05 | 4.10E-05 | 6.00E-05 | 9.50E-05 | 0        | 0        | 0        |
| 0        | 4.05E-04 | 6.50E-05 | 1.21E-04 | 1.59E-04 | 2.97E-04 | 0        | 0        | 3.90E-04 | 0        | 0        | 0.001144 | 3.34E-04 | 2.68E-04 |
| 0        | 0        | 0        | 0        | 0        | 0        | 0        | 2.40E-05 | 1.27E-04 | 0        | 3.50E-05 | 1.12E-04 | 0        | 0        |
| 9.80E-05 | 0        | 0        | 0        | 0        | 5.10E-05 | 1.00E-04 | 0        | 4.10E-05 | 9.00E-05 | 1.60E-04 | 0        | 3.60E-05 | 0        |
| 0        | 0        | 0        | 0        | 0        | 0        | 0        | 0        | 0        | 0        | 0        | 0        | 0        | 0        |
| 8.20E-05 | 0        | 2.28E-04 | 0        | 8.50E-05 | 0        | 1.56E-04 | 3.00E-05 | 4.10E-05 | 6.90E-05 | 1.43E-04 | 0        | 0        | 0        |
| 5.90E-05 | 0        | 0        | 0        | 2.40E-05 | 2.20E-05 | 0        | 7.00E-05 | 0        | 0        | 3.00E-05 | 0        | 0        | 0        |
| 1.80E-05 | 0        | 0        | 0        | 0        | 4.30E-05 | 1.17E-04 | 8.50E-05 | 0        | 2.60E-05 | 8.30E-05 | 0        | 0        | 0        |
| 2.50E-05 | 0        | 0        | 0        | 0        | 0        | 1.66E-04 | 1.90E-05 | 0        | 2.10E-05 | 8.30E-05 | 0        | 0        | 0        |
| 0.005478 | 0        | 1.98E-04 | 0        | 1.16E-04 | 9.40E-05 | 2.21E-04 | 5.22E-04 | 2.52E-04 | 9.10E-05 | 5.50E-05 | 2.90E-05 | 0        | 0        |
| 0        | 0        | 0        | 0        | 0        | 0        | 0        | 0        | 0        | 0        | 0        | 0        | 0        | 0        |
| 0        | 0        | 0        | 0        | 0        | 0        | 0        | 0        | 0        | 0        | 0        | 0        | 0        | 0        |
| 0.001209 | 0        | 2.70E-05 | 4.40E-05 | 1.08E-04 | 0        | 2.82E-04 | 0        | 0        | 1.72E-04 | 1.68E-04 | 0        | 4.00E-05 | 0        |
| 2.50E-05 | 0        | 0        | 0        | 2.40E-05 | 0        | 5.40E-05 | 4.20E-05 | 0        | 6.50E-05 | 1.90E-05 | 0        | 0        | 0        |
| 0        | 3.90E-05 | 0        | 0        | 0        | 0        | 0        | 0        | 0        | 0        | 0        | 0        | 0        | 0        |
| 0.020526 | 0.008355 | 0.008357 | 0.01424  | 0.026456 | 0.013253 | 0.010978 | 0.013936 | 0.006038 | 0.031915 | 0.01318  | 0.00508  | 0.006014 | 0.007712 |

| H061     | H002     | H123     | H088     | H096     | H090     | H108     | H133     | H015     | H062     | H044     | H124     | H028     | H023     |
|----------|----------|----------|----------|----------|----------|----------|----------|----------|----------|----------|----------|----------|----------|
| 0.265415 | 0.261114 | 0.255664 | 0.249024 | 0.237599 | 0.230278 | 0.21561  | 0.213058 | 0.207391 | 0.187942 | 0.187927 | 0.187745 | 0.174083 | 0.172769 |
| 0.101255 | 0.115684 | 0.071452 | 0.127827 | 0.072502 | 0.232579 | 0.103635 | 0.093037 | 0.135931 | 0.108873 | 0.172259 | 0.123702 | 0.176783 | 0.195312 |
| 0.053651 | 0.045012 | 0.039869 | 0.109741 | 0.123276 | 0.028453 | 0.11939  | 0.202303 | 0.037382 | 0.077977 | 0.044917 | 0.131027 | 0.023529 | 0.050827 |
| 0.105599 | 0.118995 | 0.021197 | 0.0475   | 0.024623 | 0.089623 | 0.041661 | 0.015936 | 0.078098 | 0.066904 | 0.112993 | 0.056596 | 0.050287 | 0.060958 |
| 0.017331 | 0.020831 | 0.025046 | 0.014167 | 0.012013 | 0.102323 | 0.028272 | 0.009117 | 0.047446 | 0.020696 | 0.06058  | 0.021356 | 0.028602 | 0.019138 |
| 0.16925  | 0.047461 | 0.058748 | 0.062446 | 0.079978 | 0.008851 | 0.037511 | 0.05536  | 0.128802 | 0.063177 | 0.125915 | 0.039842 | 0.037372 | 0.075394 |
| 0.03968  | 0.09427  | 0.091819 | 0.063336 | 0.048139 | 0.07903  | 0.122655 | 0.028148 | 0.069935 | 0.029586 | 0.008626 | 0.13006  | 0.06899  | 0.084441 |
| 0.123473 | 0.058431 | 0.029053 | 0.091311 | 0.049094 | 0.001614 | 0.059422 | 0.101632 | 0.076669 | 0.053785 | 0.010874 | 0.038232 | 0.037027 | 0.069747 |
| 0.002448 | 0.038189 | 0.086097 | 0.040462 | 0.159802 | 0.03787  | 0.087436 | 0.028115 | 0.043906 | 0.050142 | 0.059352 | 0.070874 | 0.027668 | 0.039079 |
| 0.003367 | 0.062709 | 0.014312 | 0.029738 | 0.008131 | 0.021017 | 0.017107 | 0.016361 | 0.007938 | 0.030528 | 0.08984  | 0.01683  | 0.013012 | 0.009317 |
| 0.0112   | 0.004035 | 0.023985 | 0.011814 | 0.02633  | 0.006724 | 0.005354 | 0.039729 | 0.005846 | 0.027919 | 0.021849 | 0.010914 | 0.008206 | 0.013261 |
| 0.018084 | 0.015967 | 0.040742 | 0.004325 | 0.014377 | 0.008233 | 0.014978 | 0.016532 | 0.026972 | 0.007116 | 0.004733 | 0.014017 | 0.002853 | 0.013801 |
| 0.006747 | 7.96E-04 | 0.004233 | 0.007248 | 0.010541 | 1.97E-04 | 0.010598 | 0.019186 | 0.001794 | 0.007035 | 0.006612 | 0.010993 | 0.002342 | 0.006827 |
| 4.69E-04 | 0.011485 | 0.005849 | 0.008817 | 0.005233 | 0.029306 | 0.012741 | 0.006395 | 0.005047 | 0.01746  | 0.004248 | 0.006777 | 0.013281 | 0.005464 |
| 0.01264  | 0.005186 | 0.004426 | 0.004186 | 0.003287 | 0.008175 | 0.006496 | 0.004109 | 0.018547 | 0.005735 | 0.010084 | 0.002734 | 0.006381 | 0.006804 |
| 0.003488 | 0.016543 | 0.009726 | 0.005395 | 0.005557 | 0.018641 | 0.009944 | 0.002004 | 0.011901 | 0.005784 | 0.00976  | 0.012467 | 0.012076 | 0.009084 |
| 0.007611 | 0.002819 | 0.007229 | 0.006416 | 0.015847 | 0.002717 | 0.00528  | 0.013313 | 0.019231 | 0.026406 | 0.006059 | 0.014948 | 0.00393  | 0.006654 |
| 7.10E-05 | 0.001539 | 0.10307  | 0.022249 | 0.003356 | 0.013023 | 0.004922 | 0.002898 | 2.70E-04 | 0.008241 | 6.95E-04 | 0.003498 | 0.014256 | 0.007829 |
| 0.004564 | 0.010427 | 0.022499 | 1.56E-04 | 0.02178  | 0        | 0.011474 | 0.016337 | 0.010918 | 0.003012 | 3.24E-04 | 0.002279 | 0.007983 | 0.009461 |
| 0.006381 | 0.001424 | 0.002463 | 0.001844 | 0.001522 | 4.12E-04 | 0.001741 | 0.039704 | 3.67E-04 | 0.002442 | 3.98E-04 | 0.002279 | 3.83E-04 | 0.003033 |
| 1.67E-04 | 0.001606 | 0.002297 | 0.002235 | 9.99E-04 | 1.04E-04 | 5.74E-04 | 0.003271 | 2.80E-05 | 0.00892  | 2.18E-04 | 0.00148  | 0.001215 | 3.90E-05 |
| 0.007342 | 0.003314 | 0.003291 | 0.003966 | 0.002515 | 0.003831 | 0.004115 | 0.001493 | 0.006682 | 0.003464 | 0.005028 | 0.002812 | 0.004649 | 0.003424 |
| 2.71E-04 | 0.002749 | 0.007043 | 0.002102 | 0.007858 | 1.45E-04 | 0.003553 | 0.003303 | 9.10E-05 | 0.046738 | 0.001123 | 0.003141 | 4.50E-04 | 4.53E-04 |
| 3.42E-04 | 1.72E-04 | 0.001231 | 0.001299 | 0.001075 | 0.003075 | 2.20E-05 | 3.50E-05 | 7.44E-04 | 0.004059 | 0.011706 | 0.003194 | 0.005722 | 0.003057 |
| 0        | 0.001379 | 0.003663 | 0.002444 | 0.001993 | 4.60E-04 | 0.001138 | 1.98E-04 | 0.005458 | 5.61E-04 | 0.007237 | 0.002293 | 0.002511 | 9.73E-04 |
| 9.10E-05 | 5.96E-04 | 0.002233 | 0.001311 | 0.001458 | 0.020337 | 0.001741 | 4.90E-04 | 0.003338 | 0.001485 | 6.50E-04 | 0.002096 | 0.002536 | 6.44E-04 |
| 0.004246 | 0.001946 | 0.00272  | 0.003758 | 0.001049 | 0.0012   | 0.003382 | 0.005026 | 0.004398 | 0.007278 | 0.00299  | 0.002005 | 0.002173 | 0.002655 |
| 0        | 0        | 1.08E-04 | 1.65E-04 | 8.90E-05 | 0        | 0.014275 | 0.001625 | 0        | 0        | 0        | 0        | 0        | 0.079678 |
| 0.002608 | 0.002295 | 0.002837 | 0.003021 | 0.001411 | 0.001499 | 0.002148 | 0.00246  | 0.002102 | 0.002635 | 0.002048 | 0.002777 | 0.004906 | 0.003833 |
| 0.005315 | 0.004737 | 0.002276 | 0.001237 | 0.002022 | 0        | 0.005218 | 0.002182 | 0.003098 | 0.004847 | 0.001969 | 0.00478  | 0.004241 | 0.001902 |
| 0        | 0.003738 | 0.007047 | 0.004824 | 0.001388 | 0.012631 | 0.010703 | 0.005671 | 6.91E-04 | 0.004545 | 0.003053 | 0.022918 | 7.42E-04 | 0.008805 |
| 0        | 0.001037 | 8.33E-04 | 0        | 0.001019 | 0        | 3.89E-04 | 0.001797 | 1.35E-04 | 0.006405 | 1.44E-04 | 8.50E-04 | 3.30E-05 | 9.90E-05 |
| 4.20E-05 | 0.001494 | 0.002045 | 0.001235 | 3.64E-04 | 0.022497 | 0.006902 | 0        | 0.001838 | 1.61E-04 | 2.70E-05 | 9.88E-04 | 0.006324 | 0.001636 |
| 8.60E-05 | 6.69E-04 | 0.005264 | 8.95E-04 | 8.57E-04 | 8.66E-04 | 8.44E-04 | 0.009359 | 0.002757 | 0.002652 | 6.85E-04 | 8.44E-04 | 7.60E-04 | 6.66E-04 |
| 0        | 1.30E-04 | 2.41E-04 | 2.28E-04 | 4.79E-04 | 0        | 2.06E-04 | 5.50E-05 | 2.10E-05 | 0.001767 | 1.26E-04 | 2.26E-04 | 0        | 0        |
| 0        | 1.69E-04 | 1.51E-04 | 0        | 2.60E-05 | 0        | 2.80E-05 | 3.15E-04 | 4.40E-05 | 7.59E-04 | 6.30E-05 | 1.04E-04 | 0.035126 | 0        |
| 0.001926 | 0.001032 | 0.002828 | 0.002563 | 0.001803 | 5.90E-05 | 0.001505 | 0.001247 | 0.002685 | 0.001998 | 0.00254  | 6.79E-04 | 0.001922 | 5.99E-04 |
| 0.002697 | 0.001689 | 0.001454 | 0.001736 | 0.001472 | 0.001645 | 0.001346 | 0.004054 | 0.002017 | 0.001157 | 0.001208 | 0.001751 | 0.0026   | 0.002874 |
| 8.88E-04 | 0.002649 | 7.38E-04 | 0.002446 | 8.25E-04 | 0.001198 | 7.53E-04 | 9.60E-05 | 0.001467 | 0.002126 | 0.0036   | 0.001364 | 0.002242 | 0.001816 |
| 5.39E-04 | 0.003719 | 0.001955 | 0.005824 | 0.004888 | 1.95E-04 | 0.002156 | 5.95E-04 | 1.70E-04 | 0.004367 | 9.76E-04 | 0.006937 | 2.89E-04 | 0.00147  |
| 0        | 3.45E-04 | 1.58E-04 | 1.80E-05 | 1.40E-04 | 0        | 1.20E-04 | 3.09E-04 | 2.40E-05 | 0.001496 | 1.33E-04 | 3.41E-04 | 0.04485  | 6.80E-05 |
| 9.34E-04 | 7.72E-04 | 0.010223 | 2.20E-04 | 9.41E-04 | 5.31E-04 | 6.06E-04 | 5.70E-04 | 2.72E-04 | 0.001084 | 7.07E-04 | 0.002581 | 2.31E-04 | 6.38E-04 |
| 3.40E-05 | 1.36E-04 | 4.38E-04 | 3.57E-04 | 0.010083 | 9.30E-05 | 0.002633 | 0.003701 | 0.009146 | 0.006139 | 1.25E-04 | 0.00155  | 0.002588 | 0.001457 |
| 3.50E-05 | 0        | 7.60E-05 | 9.50E-05 | 6.70E-05 | 0        | 2.90E-05 | 8.10E-05 | 0        | 0        | 0        | 0.001284 | 4.40E-05 | 8.16E-04 |
| 0        | 3.82E-04 | 9.11E-04 | 4.60E-05 | 6.30E-04 | 0        | 5.41E-04 | 1.38E-04 | 0        | 0.005279 | 5.30E-05 | 0.00119  | 3.30E-05 | 3.60E-05 |
| 6.99E-04 | 0.001068 | 0.001672 | 0.004206 | 0.002118 | 0        | 0.001277 | 0.002006 | 5.23E-04 | 0.001753 | 9.08E-04 | 8.50E-04 | 7.80E-04 | 0.003289 |
| 0.002843 | 0.001165 | 0.001491 | 5.77E-04 | 0.001172 | 7.80E-05 | 8.61E-04 | 1.84E-04 | 0.003528 | 4.86E-04 | 1.81E-04 | 0.001092 | 1.56E-04 | 6.10E-04 |
| 0        | 3.83E-04 | 3.97E-04 | 3.20E-05 | 3.29E-04 | 0        | 7.10E-05 | 9.98E-04 | 0        | 0.002197 | 3.20E-05 | 3.01E-04 | 0        | 3.40E-05 |
| 0        | 1.80E-05 | 2.40E-05 | 0        | 1.31E-04 | 0        | 0        | 6.90E-05 | 0        | 2.58E-04 | 5.90E-05 | 7.10E-05 | 0.041699 | 0        |
| 2.48E-04 | 0        | 9.10E-05 | 6.35E-04 | 0        | 0        | 7.81E-04 | 9.61E-04 | 3.30E-05 | 0        | 0        | 0.004099 | 4.00E-05 | 0.00435  |
| 1.30E-04 | 0.00384  | 1.40E-04 | 4.36E-04 | 8.20E-05 | 3.90E-05 | 5.13E-04 | 0.001025 | 0.003348 | 1.60E-04 | 1.55E-04 | 1.10E-04 | 0        | 9.30E-05 |
| 4.10E-04 | 0.001018 | 0.001518 | 4.76E-04 | 0.002606 | 1.85E-04 | 0.001875 | 0.002952 | 6.89E-04 | 0.001644 | 9.63E-04 | 0.002826 | 0.001079 | 0.002295 |
| 0.005022 | 0.001458 | 4.97E-04 | 0.009026 | 7.65E-04 | 9.80E-05 | 1.74E-04 | 4.52E-04 | 1.63E-04 | 0.001358 | 8.10E-04 | 0.001457 | 0        | 0.001145 |
| 4.10E-05 | 0.001541 | 4.07E-04 | 0.003887 | 0.002916 | 0        | 4.62E-04 | 1.56E-04 | 3.16E-04 | 6.08E-04 | 0.003801 | 0.001206 | 0.001608 | 6.66E-04 |
| 0.001439 | 0        | 3.50E-05 | 5.53E-04 | 0        | 1.52E-04 | 0        | 0        | 2.50E-04 | 0        | 0        | 0        | 0        | 3.40E-05 |

|          |          |          |          |          |          |          |          |          |          |          |          |          |          |
|----------|----------|----------|----------|----------|----------|----------|----------|----------|----------|----------|----------|----------|----------|
| 0        | 4.58E-04 | 2.40E-05 | 8.77E-04 | 0.001328 | 1.21E-04 | 1.55E-04 | 0.00334  | 5.42E-04 | 0.001064 | 2.14E-04 | 6.89E-04 | 1.26E-04 | 6.70E-04 |
| 0        | 1.62E-04 | 9.47E-04 | 0        | 7.81E-04 | 0        | 2.47E-04 | 1.17E-04 | 2.00E-05 | 0.008787 | 1.04E-04 | 5.85E-04 | 0        | 7.50E-05 |
| 0        | 6.00E-05 | 0        | 4.80E-05 | 9.40E-05 | 5.20E-05 | 1.09E-04 | 3.43E-04 | 4.50E-05 | 4.35E-04 | 0.001195 | 5.70E-05 | 0        | 0        |
| 0        | 5.60E-05 | 6.26E-04 | 3.10E-05 | 3.26E-04 | 0        | 2.00E-04 | 6.00E-05 | 2.90E-05 | 0.003281 | 7.60E-05 | 1.51E-04 | 4.20E-05 | 0        |
| 0        | 1.85E-04 | 3.02E-04 | 0        | 1.61E-04 | 4.70E-05 | 5.40E-05 | 3.32E-04 | 0        | 0.00117  | 2.60E-05 | 1.22E-04 | 0        | 7.10E-05 |
| 0        | 0        | 0        | 0        | 0        | 0        | 0        | 0        | 0        | 0.005678 | 0        | 0        | 0        | 0        |
| 8.90E-05 | 2.03E-04 | 1.28E-04 | 0        | 1.41E-04 | 0        | 9.40E-05 | 2.57E-04 | 0        | 0.001094 | 0        | 2.83E-04 | 0        | 0        |
| 7.23E-04 | 0        | 0        | 5.24E-04 | 0        | 6.22E-04 | 0        | 0        | 1.23E-04 | 0        | 0        | 2.80E-05 | 0        | 8.00E-05 |
| 0        | 0        | 2.40E-05 | 7.80E-05 | 2.80E-05 | 9.70E-05 | 0        | 0        | 0        | 0        | 0        | 2.73E-04 | 9.27E-04 | 2.90E-05 |
| 0        | 1.70E-04 | 1.87E-04 | 0        | 1.40E-04 | 0        | 8.50E-05 | 2.21E-04 | 2.80E-05 | 0.001006 | 2.40E-05 | 7.30E-05 | 0        | 4.50E-05 |
| 0        | 0        | 0        | 0        | 0        | 0        | 0        | 0        | 0        | 0        | 0        | 0        | 0.038115 | 0        |
| 0        | 1.64E-04 | 1.13E-04 | 0        | 8.00E-05 | 0        | 5.40E-05 | 3.23E-04 | 0        | 7.80E-04 | 2.90E-05 | 2.00E-04 | 0        | 3.70E-05 |
| 0        | 0        | 2.00E-05 | 7.00E-04 | 7.60E-05 | 0        | 0        | 0        | 0        | 2.00E-05 | 0        | 0        | 0.025968 | 4.00E-05 |
| 4.10E-05 | 9.70E-05 | 5.00E-05 | 0        | 8.50E-05 | 0        | 6.40E-05 | 1.40E-04 | 0        | 4.02E-04 | 2.50E-05 | 1.12E-04 | 0        | 0        |
| 0        | 8.60E-05 | 5.00E-05 | 0        | 5.20E-05 | 5.50E-05 | 2.60E-05 | 1.67E-04 | 0        | 7.21E-04 | 6.80E-05 | 1.02E-04 | 0        | 0        |
| 0        | 5.09E-04 | 4.83E-04 | 1.90E-05 | 4.10E-05 | 1.77E-04 | 3.04E-04 | 1.36E-04 | 2.70E-05 | 7.80E-05 | 0        | 4.59E-04 | 0        | 2.83E-04 |
| 0        | 0        | 0        | 0        | 0        | 0        | 0        | 0        | 0        | 0        | 0        | 0        | 0        | 0        |
| 0        | 0        | 0        | 0        | 0        | 0        | 0        | 0        | 0        | 0        | 0        | 0        | 0.008999 | 0        |
| 0        | 2.48E-04 | 2.07E-04 | 5.60E-05 | 4.19E-04 | 5.00E-05 | 9.00E-05 | 2.80E-05 | 0        | 0.001133 | 0        | 1.67E-04 | 0        | 2.80E-05 |
| 0        | 8.40E-05 | 8.30E-05 | 0        | 9.70E-05 | 0        | 3.70E-05 | 0        | 0        | 8.61E-04 | 2.60E-05 | 1.70E-05 | 4.20E-05 | 0        |
| 0        | 0        | 0        | 0        | 0        | 0        | 0        | 0        | 0        | 0        | 0        | 0        | 0        | 0        |
| 0.008028 | 0.017355 | 0.010944 | 0.027812 | 0.017046 | 0.008795 | 0.011313 | 0.014388 | 0.008739 | 0.044344 | 0.00685  | 0.019315 | 0.045188 | 0.009288 |

| H127     | H094     | H110     | H025     | H089     | H010     | H114     | H118     | H005     | H107     | H034     | H113     | H040     | H146     |
|----------|----------|----------|----------|----------|----------|----------|----------|----------|----------|----------|----------|----------|----------|
| 0.168155 | 0.165555 | 0.162434 | 0.160705 | 0.159389 | 0.156542 | 0.156468 | 0.142658 | 0.141571 | 0.13871  | 0.13365  | 0.132205 | 0.123141 | 0.119874 |
| 0.175725 | 0.302806 | 0.077512 | 0.091781 | 0.072742 | 0.192279 | 0.295731 | 0.166853 | 0.099612 | 0.136339 | 0.213616 | 0.176193 | 0.234064 | 0.192844 |
| 0.04966  | 0.023055 | 0.116157 | 0.055333 | 0.01302  | 0.120512 | 0.030113 | 0.061838 | 0.028259 | 0.094172 | 0.034623 | 0.085959 | 0.056927 | 0.022118 |
| 0.063677 | 0.090179 | 0.055023 | 0.067648 | 0.050399 | 0.043497 | 0.091193 | 0.041131 | 0.068851 | 0.042541 | 0.066252 | 0.038876 | 0.054372 | 0.010043 |
| 0.050305 | 0.075733 | 0.02632  | 0.018814 | 0.100267 | 0.009459 | 0.017351 | 0.01147  | 0.072855 | 0.013105 | 0.031515 | 0.019497 | 0.072401 | 0.020232 |
| 0.089644 | 0.033051 | 0.10566  | 0.09607  | 0.202405 | 0.041878 | 0.084601 | 0.094606 | 0.159547 | 0.043454 | 0.017632 | 0.037751 | 0.039461 | 0.176686 |
| 0.082868 | 0.067744 | 0.051633 | 0.049065 | 0.056574 | 0.116427 | 0.048592 | 0.105647 | 0.061616 | 0.051552 | 0.029577 | 0.124359 | 0.12121  | 0.010177 |
| 0.045968 | 0.024664 | 0.07691  | 0.118325 | 0.048542 | 0.022937 | 0.021071 | 0.133493 | 0.030951 | 0.066931 | 0.00739  | 0.080876 | 0.016716 | 0.200453 |
| 0.042749 | 0.020573 | 0.070767 | 0.082003 | 0.013339 | 0.041269 | 0.055421 | 0.053514 | 0.004939 | 0.081992 | 0.033944 | 0.026317 | 0.037379 | 0.005404 |
| 0.022698 | 0.027273 | 0.028158 | 0.010596 | 0.018867 | 0.021    | 0.04481  | 0.007474 | 0.041573 | 0.022667 | 0.029411 | 0.009934 | 0.02946  | 0.010895 |
| 0.008089 | 0.01421  | 0.025702 | 0.00482  | 0.004825 | 0.027893 | 0.022058 | 0.007522 | 0.01973  | 0.044397 | 0.005108 | 0.011533 | 0.011073 | 0.033319 |
| 0.030434 | 0.003822 | 0.022547 | 0.017107 | 0.096315 | 0.003222 | 0.015125 | 0.0103   | 0.068741 | 0.004563 | 0.002415 | 0.05607  | 0.016558 | 0.048934 |
| 0.006451 | 0.001328 | 0.026469 | 0.011198 | 9.05E-04 | 0.00597  | 0.002445 | 0.009977 | 0.008465 | 0.021013 | 0.002021 | 0.021052 | 0.004866 | 4.39E-04 |
| 0.011645 | 0.026055 | 0.004235 | 0.017349 | 0.019594 | 0.00928  | 0.004916 | 0.005913 | 0.011612 | 0.002493 | 0.067025 | 0.00877  | 0.025672 | 0.018072 |
| 0.015116 | 0.016119 | 0.005045 | 0.008294 | 0.020155 | 0.002558 | 0.009869 | 0.006939 | 0.018384 | 0.005477 | 0.009712 | 0.003868 | 0.00621  | 0.019184 |
| 0.015717 | 0.011248 | 0.007856 | 0.007661 | 0.012773 | 0.007814 | 0.011928 | 0.005421 | 0.023168 | 0.008477 | 0.00598  | 0.006431 | 0.00742  | 0.008363 |
| 0.013637 | 0.012919 | 0.017853 | 0.006811 | 0.001687 | 0.009724 | 0.003581 | 0.011286 | 0.007767 | 0.031302 | 0.00588  | 0.011889 | 0.004964 | 0.002519 |
| 3.59E-04 | 1.71E-04 | 0.004824 | 0.003471 | 2.04E-04 | 0        | 0.014581 | 7.69E-04 | 0        | 0.003349 | 9.90E-04 | 8.62E-04 | 0.017129 | 2.00E-05 |
| 0.014053 | 0.010028 | 0.006742 | 0.008193 | 0.011568 | 0.001626 | 1.81E-04 | 0.02845  | 0.001751 | 0.001485 | 0.009076 | 0.019636 | 0.003651 | 0.029769 |
| 0.001447 | 2.03E-04 | 0.008728 | 0.003426 | 2.20E-04 | 0.001791 | 0.004077 | 0.00714  | 7.33E-04 | 0.007679 | 4.22E-04 | 0.00211  | 0.00232  | 0.001197 |
| 1.87E-04 | 1.40E-04 | 0.001445 | 4.64E-04 | 1.13E-04 | 0.020272 | 1.68E-04 | 0.006421 | 4.80E-05 | 0.013014 | 0.001521 | 0.002746 | 2.77E-04 | 0.002635 |
| 0.011527 | 0.004541 | 0.00355  | 0.006575 | 0.004912 | 0.002755 | 0.004552 | 0.00408  | 0.013681 | 0.003301 | 0.004757 | 0.005457 | 0.004813 | 0.00536  |
| 9.70E-04 | 4.97E-04 | 0.005867 | 7.13E-04 | 2.70E-04 | 0.034694 | 8.85E-04 | 0.002276 | 4.77E-04 | 0.037066 | 1.30E-04 | 0.005513 | 0.003798 | 2.42E-04 |
| 6.63E-04 | 0.010364 | 3.17E-04 | 7.10E-05 | 0.001163 | 0.001491 | 0.003931 | 4.99E-04 | 2.47E-04 | 9.54E-04 | 0.00546  | 0.003813 | 0.021275 | 2.20E-05 |
| 0.005178 | 0.005206 | 0.004029 | 0.002148 | 0.00182  | 1.53E-04 | 0.008115 | 0.001251 | 0.023484 | 0.002659 | 0.003873 | 9.08E-04 | 0.002078 | 1.41E-04 |
| 0.009502 | 0.00457  | 7.17E-04 | 0.001489 | 0.002635 | 9.62E-04 | 0.002188 | 7.62E-04 | 0.002062 | 0.002844 | 0.002391 | 9.68E-04 | 0.010483 | 0.003969 |
| 0.005519 | 0.002033 | 0.002637 | 0.004999 | 0.003596 | 0.004087 | 0.002745 | 0.00603  | 0.006423 | 0.001274 | 0.001568 | 0.003881 | 0.001661 | 0.006264 |
| 0        | 0        | 0        | 0.005951 | 3.80E-05 | 1.18E-04 | 2.30E-05 | 0        | 0        | 0        | 0        | 0        | 0        | 0.002295 |
| 0.005365 | 0.013059 | 0.001165 | 0.001753 | 0.003339 | 0.003381 | 0.002382 | 0.005534 | 0.023414 | 0.00307  | 0.004202 | 0.002632 | 0.005015 | 0.002386 |
| 0.004016 | 0.003752 | 0.002384 | 0.005381 | 0.004245 | 0.001033 | 0.001671 | 0.00388  | 0.012488 | 0.001165 | 0.012791 | 0.004588 | 0.004575 | 0.002005 |
| 0.009122 | 0.005805 | 0.010083 | 9.86E-04 | 0.001369 | 3.63E-04 | 0.002132 | 0.006449 | 6.90E-05 | 0.002764 | 0.001737 | 0.015481 | 0.009471 | 8.26E-04 |
| 9.20E-05 | 0        | 8.96E-04 | 8.30E-05 | 5.10E-05 | 0.012502 | 5.60E-05 | 0.003535 | 4.60E-05 | 0.010458 | 6.00E-05 | 0.002025 | 2.12E-04 | 0.001779 |
| 0.003209 | 0.002994 | 3.50E-04 | 1.85E-04 | 0.00175  | 0.001249 | 0.001537 | 1.06E-04 | 0.005935 | 8.40E-05 | 0.00917  | 0.001131 | 0.002688 | 0.001269 |
| 8.80E-05 | 4.67E-04 | 0.008781 | 2.71E-04 | 0.002732 | 7.32E-04 | 8.16E-04 | 0.001784 | 6.00E-05 | 0.0013   | 3.66E-04 | 0.00604  | 0.00267  | 3.65E-04 |
| 2.80E-05 | 3.70E-05 | 1.72E-04 | 6.40E-05 | 0        | 0.00134  | 4.70E-05 | 0        | 6.90E-05 | 0.001283 | 0        | 9.80E-05 | 3.49E-04 | 0        |
| 4.20E-05 | 0        | 3.01E-04 | 0.024734 | 0        | 0.001242 | 0        | 4.09E-04 | 3.50E-05 | 8.22E-04 | 0.038432 | 1.06E-04 | 8.20E-05 | 2.02E-04 |
| 0.003064 | 6.14E-04 | 0.004713 | 0.001302 | 0.014804 | 4.01E-04 | 0.001313 | 0.003047 | 0.017594 | 0.003825 | 7.84E-04 | 9.39E-04 | 8.69E-04 | 0.001937 |
| 0.002329 | 0.002798 | 7.63E-04 | 0.001335 | 0.00178  | 0.002937 | 0.001526 | 0.003209 | 0.002042 | 5.79E-04 | 0.002031 | 0.001294 | 0.00258  | 0.00794  |
| 0.001374 | 0.00323  | 7.77E-04 | 6.51E-04 | 0.001221 | 0.001379 | 0.011094 | 6.24E-04 | 0.003702 | 0.001008 | 0.003077 | 0.001288 | 0.004904 | 0        |
| 9.63E-04 | 6.29E-04 | 0.001061 | 0.006174 | 0.001442 | 1.99E-04 | 2.54E-04 | 0.001338 | 9.02E-04 | 5.46E-04 | 0.001065 | 0.00123  | 9.83E-04 | 0        |
| 3.90E-05 | 2.70E-05 | 3.73E-04 | 0.002053 | 0        | 0.002225 | 2.10E-05 | 6.20E-04 | 1.50E-05 | 0.002138 | 0.046067 | 5.47E-04 | 9.80E-05 | 2.14E-04 |
| 0.001079 | 6.30E-04 | 5.93E-04 | 4.52E-04 | 3.24E-04 | 9.20E-05 | 5.59E-04 | 4.02E-04 | 8.60E-05 | 1.06E-04 | 3.17E-04 | 0.003856 | 0.002689 | 4.24E-04 |
| 0.003521 | 1.69E-04 | 0.001492 | 0.02996  | 6.42E-04 | 0.003619 | 2.21E-04 | 0.00318  | 2.60E-05 | 0.002049 | 0.004559 | 0.008708 | 0.002142 | 0.012383 |
| 0        | 0        | 0.001174 | 2.56E-04 | 1.89E-04 | 0        | 5.04E-04 | 2.94E-04 | 0        | 0        | 8.20E-05 | 0.005616 | 1.21E-04 | 0        |
| 0        | 0        | 9.15E-04 | 4.50E-05 | 0        | 0.001619 | 9.90E-05 | 8.97E-04 | 1.80E-05 | 0.01119  | 0        | 0.001839 | 1.74E-04 | 0        |
| 0.00516  | 2.16E-04 | 0.003837 | 0.006578 | 0.002483 | 0.001437 | 9.10E-05 | 0.001356 | 0.001037 | 0.001256 | 2.33E-04 | 0.001927 | 0.001696 | 4.90E-05 |
| 0.002609 | 1.35E-04 | 0.002243 | 0.002155 | 0.009844 | 5.90E-05 | 9.70E-05 | 3.76E-04 | 0.005054 | 0        | 6.70E-05 | 7.54E-04 | 4.11E-04 | 7.70E-05 |
| 8.70E-05 | 0        | 3.92E-04 | 4.80E-05 | 0        | 0.006021 | 7.30E-05 | 0.001533 | 2.00E-05 | 0.004239 | 3.70E-05 | 9.89E-04 | 1.25E-04 | 8.07E-04 |
| 4.20E-05 | 0        | 1.76E-04 | 0.002153 | 0        | 8.51E-04 | 0        | 2.12E-04 | 1.90E-05 | 7.09E-04 | 0.024551 | 5.30E-05 | 7.20E-05 | 2.09E-04 |
| 3.04E-04 | 1.65E-04 | 0.004513 | 5.32E-04 | 1.28E-04 | 0        | 0.001281 | 4.05E-04 | 2.60E-05 | 7.36E-04 | 2.98E-04 | 0.005404 | 1.83E-04 | 0        |
| 1.30E-04 | 6.70E-05 | 0.003151 | 2.17E-04 | 4.04E-04 | 0.00102  | 0.002034 | 5.00E-05 | 7.40E-05 | 4.74E-04 | 0        | 3.81E-04 | 2.62E-04 | 0        |
| 0.001053 | 5.54E-04 | 0.004083 | 0.004402 | 0.001478 | 3.57E-04 | 0.001086 | 0.001341 | 0.001737 | 0.003428 | 7.50E-04 | 0.002434 | 0.002163 | 0.001102 |
| 3.29E-04 | 9.62E-04 | 8.94E-04 | 0.001829 | 0.003239 | 1.37E-04 | 7.50E-05 | 9.40E-04 | 2.33E-04 | 0        | 3.88E-04 | 8.40E-05 | 0.001488 | 0        |
| 3.12E-04 | 3.33E-04 | 9.83E-04 | 0.001768 | 0.003405 | 6.43E-04 | 2.61E-04 | 2.59E-04 | 6.43E-04 | 0.006114 | 1.00E-04 | 3.74E-04 | 0.004157 | 0        |
| 4.00E-05 | 2.20E-04 | 0        | 1.44E-04 | 2.98E-04 | 0        | 7.10E-05 | 2.50E-05 | 4.40E-05 | 0        | 0        | 0        | 0        | 0        |

|          |          |          |          |          |          |          |          |          |          |          |          |          |          |
|----------|----------|----------|----------|----------|----------|----------|----------|----------|----------|----------|----------|----------|----------|
| 9.70E-05 | 1.50E-04 | 5.39E-04 | 9.33E-04 | 0.00166  | 0        | 0.005968 | 1.43E-04 | 9.00E-05 | 3.50E-04 | 2.87E-04 | 8.08E-04 | 8.46E-04 | 2.78E-04 |
| 2.26E-04 | 0        | 5.95E-04 | 4.50E-05 | 0        | 0.0037   | 5.80E-05 | 4.68E-04 | 2.90E-05 | 0.005252 | 2.20E-05 | 0.002831 | 2.07E-04 | 0        |
| 5.00E-05 | 0        | 1.01E-04 | 6.60E-05 | 0        | 7.55E-04 | 0.00141  | 0        | 7.40E-05 | 0        | 0        | 1.17E-04 | 1.40E-04 | 0        |
| 0        | 0        | 6.42E-04 | 0        | 0        | 0.001026 | 2.20E-05 | 4.84E-04 | 1.40E-05 | 0.004192 | 0        | 7.84E-04 | 0        | 0        |
| 0        | 0        | 2.20E-04 | 1.30E-05 | 0        | 0.001479 | 0        | 5.57E-04 | 2.20E-05 | 0.001187 | 0        | 9.39E-04 | 1.51E-04 | 2.66E-04 |
| 1.71E-04 | 0        | 0        | 0        | 0        | 0        | 0        | 0        | 0        | 0        | 0        | 0        | 0        | 0        |
| 5.20E-05 | 0        | 2.71E-04 | 0        | 0        | 0.002909 | 0        | 6.48E-04 | 0        | 0.001639 | 0        | 3.80E-04 | 4.00E-05 | 3.36E-04 |
| 1.97E-04 | 1.94E-04 | 0        | 2.40E-05 | 3.60E-05 | 0        | 6.20E-05 | 0        | 1.07E-04 | 0        | 0        | 0        | 0        | 0        |
| 0        | 5.82E-04 | 2.04E-04 | 1.30E-05 | 1.41E-04 | 0        | 6.90E-05 | 5.70E-05 | 0        | 5.23E-04 | 2.40E-05 | 0        | 0.001614 | 0        |
| 4.30E-05 | 0        | 1.38E-04 | 1.50E-05 | 0        | 0.002339 | 3.00E-05 | 6.99E-04 | 0        | 0.002371 | 0        | 2.74E-04 | 0        | 3.01E-04 |
| 0        | 0        | 0        | 4.31E-04 | 0        | 0        | 0        | 0        | 0        | 0        | 0.010544 | 0        | 0        | 0        |
| 0        | 0        | 1.26E-04 | 1.90E-05 | 0.00191  | 0.001876 | 0        | 3.86E-04 | 0        | 0.001845 | 0        | 2.52E-04 | 7.90E-05 | 1.83E-04 |
| 0        | 2.50E-05 | 0        | 0.001508 | 0        | 2.31E-04 | 5.20E-05 | 6.60E-05 | 0        | 1.82E-04 | 0.003943 | 1.26E-04 | 2.40E-05 | 2.50E-05 |
| 0        | 0        | 0        | 2.80E-05 | 7.50E-05 | 0.001066 | 0        | 3.92E-04 | 0        | 0.001186 | 0        | 7.72E-04 | 3.50E-05 | 2.51E-04 |
| 7.40E-05 | 0        | 5.50E-05 | 1.90E-05 | 0        | 0.001583 | 1.70E-05 | 3.09E-04 | 0        | 6.36E-04 | 0        | 4.32E-04 | 0        | 1.06E-04 |
| 0        | 4.03E-04 | 1.86E-04 | 2.00E-05 | 0        | 1.03E-04 | 4.10E-05 | 6.60E-05 | 0        | 0        | 1.29E-04 | 0.001011 | 0        | 1.05E-04 |
| 0        | 0        | 5.00E-05 | 0.002889 | 0        | 0        | 0        | 0        | 0        | 0        | 0.013024 | 0        | 0        | 0        |
| 0        | 0        | 0        | 5.20E-05 | 0        | 0        | 0        | 0        | 0        | 0        | 0.026348 | 0        | 0        | 0        |
| 4.70E-05 | 3.90E-05 | 3.56E-04 | 2.60E-05 | 0        | 0.001    | 8.20E-05 | 2.00E-05 | 2.50E-05 | 5.18E-04 | 0        | 1.14E-04 | 2.02E-04 | 0        |
| 3.80E-05 | 0        | 2.05E-04 | 0        | 4.30E-05 | 5.03E-04 | 2.80E-05 | 2.47E-04 | 0        | 8.20E-04 | 0        | 5.75E-04 | 0        | 0        |
| 0        | 0        | 0        | 0        | 0        | 6.60E-05 | 0        | 0        | 0        | 6.20E-05 | 0        | 2.70E-05 | 0        | 0        |
| 0.012665 | 0.007657 | 0.02091  | 0.037308 | 0.022631 | 0.036316 | 0.006141 | 0.019933 | 0.007704 | 0.037084 | 0.068576 | 0.023266 | 0.017104 | 0.012705 |



| H131     | H141     | H029     | H102     | H122     | H009     | H104     | H021     | H092     | H051     | H059     | H078     | H035     | H076     |
|----------|----------|----------|----------|----------|----------|----------|----------|----------|----------|----------|----------|----------|----------|
| 0.11938  | 0.111941 | 0.10617  | 0.100837 | 0.100495 | 0.099897 | 0.098795 | 0.09748  | 0.095907 | 0.09159  | 0.08992  | 0.088421 | 0.087771 | 0.086075 |
| 0.144967 | 0.241613 | 0.170335 | 0.05537  | 0.108107 | 0.118788 | 0.08663  | 0.203384 | 0.16936  | 0.105669 | 0.146688 | 0.247447 | 0.177118 | 0.187771 |
| 0.089222 | 0.082367 | 0.067951 | 0.039765 | 0.163916 | 0.032761 | 0.097115 | 0.06477  | 0.070033 | 0.09227  | 0.036955 | 0.037035 | 0.050402 | 0.009223 |
| 0.047959 | 0.130257 | 0.076709 | 0.017216 | 0.031596 | 0.044561 | 0.026649 | 0.064023 | 0.06494  | 0.044775 | 0.016947 | 0.081323 | 0.04992  | 0.055368 |
| 0.197821 | 0.070088 | 0.016489 | 0.024864 | 0.014035 | 0.044368 | 0.006641 | 0.034765 | 0.033659 | 0.008673 | 0.002507 | 0.050392 | 0.008731 | 0.27655  |
| 0.036385 | 0.040061 | 0.019749 | 0.134836 | 0.059419 | 0.174969 | 0.058494 | 0.106357 | 0.116223 | 0.080839 | 0.029516 | 0.086687 | 0.113835 | 0.063668 |
| 0.043232 | 0.031038 | 0.110055 | 0.107406 | 0.042734 | 0.1018   | 0.10839  | 0.049378 | 0.150554 | 0.153463 | 0.005988 | 0.099361 | 0.105451 | 0.076983 |
| 0.032828 | 0.049357 | 0.039776 | 0.062557 | 0.022399 | 0.095035 | 0.063819 | 0.096483 | 0.061063 | 0.083413 | 0.050016 | 0.037033 | 0.166004 | 0.019958 |
| 0.018566 | 0.037773 | 0.053307 | 0.057242 | 0.302842 | 0.023597 | 0.068664 | 0.010118 | 0.046342 | 0.115285 | 0.031161 | 0.032465 | 0.072993 | 0.014865 |
| 0.023841 | 0.045852 | 0.017022 | 0.006302 | 0.008193 | 0.008808 | 0.018275 | 0.017013 | 0.006375 | 0.011619 | 0.010586 | 0.01731  | 0.009678 | 0.014924 |
| 0.010308 | 0.029848 | 0.011795 | 0.00592  | 0.011298 | 0.005169 | 0.010757 | 0.009097 | 0.003341 | 0.005577 | 0.006292 | 0.003215 | 0.005122 | 0.003597 |
| 0.004452 | 0.004408 | 0.002198 | 0.063727 | 0.006726 | 0.05586  | 0.013151 | 0.014677 | 0.014119 | 0.017165 | 8.40E-05 | 0.022659 | 0.003457 | 0.007711 |
| 0.004098 | 0.003284 | 0.005723 | 0.005065 | 0.009333 | 0.003945 | 0.07229  | 0.007103 | 0.014125 | 0.00762  | 0.005425 | 0.004472 | 0.006296 | 0.001184 |
| 0.015432 | 0.001566 | 0.011222 | 0.006581 | 0.003123 | 0.013313 | 0.01302  | 0.011579 | 0.010713 | 0.007535 | 8.20E-05 | 0.029734 | 0.014341 | 0.004852 |
| 0.005949 | 0.009086 | 0.002804 | 0.006454 | 0.003675 | 0.006989 | 0.003741 | 0.007492 | 0.006619 | 0.005767 | 0.0057   | 0.014912 | 0.006449 | 0.015628 |
| 0.009962 | 0.003973 | 0.010587 | 0.020161 | 0.007998 | 0.018619 | 0.00287  | 0.019676 | 0.008086 | 0.012284 | 0.001257 | 0.010129 | 0.005117 | 0.025349 |
| 0.004481 | 0.010993 | 0.004837 | 0.003746 | 0.003514 | 0.003339 | 0.003281 | 0.003937 | 0.007563 | 0.003456 | 0.005917 | 0.006157 | 0.009822 | 0.001654 |
| 3.62E-04 | 0.001407 | 1.18E-04 | 0.002176 | 0.004518 | 1.18E-04 | 0.074788 | 0.003751 | 2.25E-04 | 0.004559 | 0        | 8.53E-04 | 2.57E-04 | 9.88E-04 |
| 0.014001 | 1.95E-04 | 9.88E-04 | 0.008702 | 0.004017 | 0.015679 | 0.00842  | 0.004602 | 0.01085  | 0.009578 | 0.004412 | 0.044848 | 0.011761 | 0.023782 |
| 0.002813 | 0.002728 | 6.55E-04 | 0.001014 | 0.001376 | 0.003291 | 0.020541 | 0.001395 | 5.25E-04 | 0.005829 | 0        | 3.80E-04 | 3.17E-04 | 1.09E-04 |
| 0.001069 | 3.80E-05 | 0.003044 | 1.56E-04 | 0.001013 | 0.011218 | 0.008441 | 2.58E-04 | 8.30E-05 | 0.001469 | 0.099283 | 7.40E-05 | 0.001313 | 4.80E-05 |
| 0.002675 | 0.013945 | 0.004318 | 0.00135  | 0.003196 | 0.010571 | 0.002512 | 0.0061   | 0.003869 | 0.002794 | 0.002773 | 0.006612 | 0.006225 | 0.008194 |
| 0.007151 | 0.00236  | 0.002898 | 0.00105  | 0.008702 | 0.004832 | 0.045344 | 0.001738 | 0.001221 | 0.001863 | 0.019228 | 1.07E-04 | 0.001769 | 3.41E-04 |
| 0.005561 | 0.003551 | 0.008254 | 4.21E-04 | 0.003747 | 6.00E-05 | 2.60E-05 | 0.003658 | 8.94E-04 | 5.90E-04 | 5.82E-04 | 0.0019   | 1.70E-05 | 0.013816 |
| 0.00407  | 0.005108 | 0.002998 | 0.00389  | 0.003155 | 0.002102 | 0.004266 | 0.004759 | 0.001503 | 0.00192  | 0.002051 | 0.001638 | 5.79E-04 | 0.005455 |
| 0.024692 | 0.002509 | 0.002133 | 7.66E-04 | 6.47E-04 | 0.00204  | 3.72E-04 | 0.00159  | 0.002045 | 6.45E-04 | 0        | 0.009291 | 3.74E-04 | 0.015962 |
| 0.00147  | 0.005191 | 0.001711 | 0.002313 | 0.003214 | 0.004    | 0.002441 | 0.004016 | 0.009345 | 0.004965 | 1.78E-04 | 0.006583 | 0.011339 | 9.78E-04 |
| 0        | 0        | 0        | 0.193277 | 0.013631 | 0        | 6.78E-04 | 2.50E-05 | 0        | 3.33E-04 | 0        | 0        | 0        | 0        |
| 0.001941 | 0.004842 | 0.002399 | 9.35E-04 | 0.001627 | 0.004013 | 0.003022 | 0.00598  | 0.009886 | 0.003503 | 0.004092 | 0.002807 | 0.005666 | 0.007281 |
| 0.005575 | 8.33E-04 | 0.011985 | 0.006995 | 0.00258  | 0.006134 | 6.51E-04 | 0.003429 | 0.002588 | 0.004442 | 0.001882 | 0.005237 | 2.55E-04 | 0.002995 |
| 0.004714 | 9.18E-04 | 0.002247 | 0.006138 | 0.013542 | 0.001996 | 9.99E-04 | 0.00773  | 0.012842 | 0.005941 | 8.90E-05 | 0.001868 | 0.003575 | 0.003386 |
| 7.95E-04 | 0        | 0.001681 | 0        | 3.97E-04 | 0.00703  | 0.004523 | 1.35E-04 | 1.36E-04 | 0.001028 | 0.063046 | 3.50E-05 | 7.65E-04 | 2.40E-05 |
| 0.004808 | 0.010247 | 0.004273 | 3.40E-05 | 0.00159  | 0.001134 | 1.94E-04 | 1.73E-04 | 0.00192  | 6.13E-04 | 0        | 0.006305 | 0        | 0.02053  |
| 0.003855 | 0.011001 | 7.01E-04 | 5.37E-04 | 0.001601 | 0.001234 | 7.20E-04 | 0.018576 | 2.78E-04 | 6.10E-04 | 0        | 3.90E-05 | 6.31E-04 | 2.92E-04 |
| 2.29E-04 | 1.83E-04 | 1.47E-04 | 6.80E-05 | 3.01E-04 | 2.90E-05 | 8.11E-04 | 2.69E-04 | 0        | 1.12E-04 | 0        | 0        | 1.62E-04 | 0        |
| 6.60E-05 | 0        | 0.077401 | 0        | 7.40E-05 | 7.47E-04 | 3.08E-04 | 2.20E-05 | 0        | 1.47E-04 | 0.004968 | 0        | 3.60E-05 | 2.60E-05 |
| 0.005013 | 0.00114  | 7.58E-04 | 0.005932 | 0.001223 | 0.005084 | 0.001149 | 0.004359 | 0.003309 | 0.003133 | 0        | 0.001112 | 0.002039 | 0.005929 |
| 0.001832 | 0.003517 | 0.002614 | 7.84E-04 | 0.002275 | 0.00178  | 7.42E-04 | 0.002062 | 0.004529 | 0.004186 | 0        | 0.002327 | 0.008504 | 0.001784 |
| 0.006202 | 0.002684 | 0.002589 | 0.001053 | 7.55E-04 | 0.001147 | 1.99E-04 | 0.00415  | 0.003306 | 0.002547 | 4.90E-04 | 0.001724 | 6.75E-04 | 0.002016 |
| 0.005245 | 9.50E-04 | 0.002026 | 0.002305 | 0.002706 | 4.72E-04 | 0.002509 | 0.008998 | 0.004606 | 0.006064 | 4.31E-04 | 0.002402 | 0.003379 | 8.51E-04 |
| 1.41E-04 | 9.00E-05 | 0.023048 | 0.003689 | 8.30E-05 | 0.002089 | 9.13E-04 | 1.98E-04 | 3.80E-05 | 3.86E-04 | 0.012887 | 4.30E-05 | 1.60E-04 | 3.90E-05 |
| 3.97E-04 | 2.23E-04 | 6.16E-04 | 0.001801 | 5.40E-04 | 0.002679 | 3.38E-04 | 7.87E-04 | 4.44E-04 | 0.001851 | 0        | 0.010097 | 2.26E-04 | 7.75E-04 |
| 0.002227 | 0.002505 | 7.74E-04 | 0.001423 | 1.16E-04 | 0.002991 | 0.003187 | 0.001148 | 0.012919 | 0.004141 | 0        | 0.005532 | 3.44E-04 | 0.002223 |
| 2.35E-04 | 3.50E-05 | 0        | 0.001145 | 0        | 4.08E-04 | 4.60E-04 | 1.98E-04 | 5.43E-04 | 0.001585 | 0        | 3.90E-05 | 0        | 0        |
| 8.01E-04 | 3.20E-05 | 3.29E-04 | 7.60E-05 | 9.21E-04 | 3.57E-04 | 0.003483 | 1.70E-05 | 0        | 5.26E-04 | 0.059944 | 0        | 8.00E-05 | 2.90E-05 |
| 0.002525 | 3.32E-04 | 4.85E-04 | 0.004706 | 0.001249 | 0.003532 | 0.002272 | 0.003748 | 0.006927 | 0.007682 | 0.004843 | 3.05E-04 | 0.012151 | 0.001456 |
| 1.65E-04 | 2.40E-04 | 5.50E-05 | 0.005524 | 9.24E-04 | 0.008989 | 0.001404 | 0.003673 | 9.39E-04 | 0.001828 | 0        | 6.02E-04 | 0.00169  | 0.002509 |
| 3.18E-04 | 0        | 7.93E-04 | 0        | 1.82E-04 | 0.0035   | 0.002006 | 4.40E-05 | 0        | 5.39E-04 | 0.028393 | 0        | 0.003072 | 0        |
| 5.70E-05 | 0        | 0.021879 | 4.60E-05 | 4.40E-05 | 6.39E-04 | 3.49E-04 | 0        | 0        | 8.40E-05 | 0.004631 | 0        | 7.40E-05 | 0        |
| 2.06E-04 | 3.40E-05 | 1.79E-04 | 5.62E-04 | 6.20E-05 | 4.34E-04 | 0        | 7.52E-04 | 0.00278  | 0.00244  | 0        | 5.13E-04 | 5.64E-04 | 5.00E-05 |
| 0.005202 | 0.00706  | 3.58E-04 | 7.10E-05 | 1.72E-04 | 1.53E-04 | 0        | 2.40E-04 | 1.22E-04 | 3.00E-05 | 0        | 1.32E-04 | 4.30E-05 | 0.001669 |
| 0.001106 | 3.73E-04 | 0.001566 | 0.003416 | 0.001173 | 0.001587 | 0.004677 | 4.86E-04 | 0.001379 | 8.74E-04 | 0.001059 | 0.001923 | 7.01E-04 | 5.47E-04 |
| 0.00212  | 2.60E-04 | 9.70E-04 | 0.003352 | 0.00207  | 4.22E-04 | 6.81E-04 | 0.013985 | 0.002037 | 0.00335  | 0        | 8.04E-04 | 0.005187 | 3.44E-04 |
| 0.005966 | 5.79E-04 | 0.001374 | 4.72E-04 | 5.04E-04 | 2.20E-05 | 6.00E-04 | 0.003596 | 0.001715 | 0.002529 | 6.71E-04 | 2.45E-04 | 0.001829 | 6.01E-04 |
| 0        | 5.15E-04 | 0        | 4.90E-05 | 0        | 0        | 0        | 2.50E-05 | 3.55E-04 | 0        | 0        | 9.47E-04 | 1.79E-04 | 0        |

|          |          |          |          |          |          |          |          |          |          |          |          |          |          |
|----------|----------|----------|----------|----------|----------|----------|----------|----------|----------|----------|----------|----------|----------|
| 0.002294 | 5.02E-04 | 7.72E-04 | 2.66E-04 | 2.91E-04 | 1.08E-04 | 2.73E-04 | 0.001424 | 3.46E-04 | 1.82E-04 | 0        | 8.70E-05 | 7.00E-04 | 8.90E-05 |
| 7.34E-04 | 8.10E-05 | 3.93E-04 | 1.15E-04 | 9.52E-04 | 0.001164 | 0.003472 | 2.08E-04 | 3.10E-05 | 8.56E-04 | 0.0189   | 0        | 1.37E-04 | 2.50E-05 |
| 3.38E-04 | 4.00E-04 | 8.50E-05 | 3.20E-05 | 2.60E-05 | 0        | 0        | 7.30E-05 | 0        | 2.20E-05 | 0        | 0        | 2.00E-05 | 2.60E-05 |
| 3.92E-04 | 4.10E-05 | 4.97E-04 | 0        | 5.86E-04 | 6.70E-04 | 0.002381 | 2.50E-05 | 0        | 3.47E-04 | 0.021505 | 0        | 0        | 2.20E-05 |
| 0.002031 | 0        | 3.55E-04 | 0        | 1.23E-04 | 0.001576 | 0.001057 | 2.30E-05 | 0        | 2.58E-04 | 0.011109 | 4.10E-05 | 2.47E-04 | 2.00E-05 |
| 0        | 0        | 0        | 0        | 0        | 0        | 0        | 0.021526 | 0        | 0.023639 | 0        | 0        | 0        | 0        |
| 1.52E-04 | 0        | 2.20E-04 | 0        | 5.10E-05 | 0.001338 | 0.001269 | 5.20E-05 | 0        | 1.11E-04 | 0.0106   | 0        | 0.001588 | 0        |
| 0        | 5.60E-05 | 0        | 4.20E-05 | 0        | 0        | 0        | 2.10E-05 | 1.24E-04 | 0        | 0        | 2.99E-04 | 1.45E-04 | 0        |
| 0.02137  | 5.30E-05 | 3.60E-05 | 0        | 0        | 0        | 0        | 2.01E-04 | 0        | 0        | 0        | 1.45E-04 | 1.60E-05 | 0.00112  |
| 1.54E-04 | 0        | 3.71E-04 | 0        | 8.30E-05 | 9.32E-04 | 9.01E-04 | 6.10E-05 | 0        | 1.86E-04 | 0.009004 | 0        | 3.70E-05 | 0        |
| 0        | 0        | 0.002906 | 0        | 0        | 4.90E-05 | 0        | 0        | 0        | 0        | 0        | 0        | 0        | 0        |
| 1.05E-04 | 0        | 1.58E-04 | 0        | 8.80E-05 | 0.001215 | 7.30E-04 | 5.89E-04 | 3.60E-05 | 7.97E-04 | 0.007213 | 0        | 0        | 0        |
| 1.40E-05 | 0        | 0.003279 | 0        | 5.80E-05 | 5.60E-05 | 1.43E-04 | 2.50E-05 | 4.70E-05 | 0        | 6.46E-04 | 0        | 1.90E-05 | 2.70E-05 |
| 5.40E-05 | 0        | 1.91E-04 | 0        | 3.60E-05 | 4.79E-04 | 3.13E-04 | 1.80E-05 | 0        | 5.70E-05 | 0.00571  | 0        | 0        | 0        |
| 7.50E-05 | 0        | 3.51E-04 | 0        | 5.00E-05 | 8.74E-04 | 4.55E-04 | 6.60E-05 | 0        | 8.60E-05 | 0.005857 | 4.20E-05 | 1.70E-04 | 0        |
| 0        | 0        | 2.70E-05 | 2.40E-04 | 0        | 5.43E-04 | 1.77E-04 | 4.80E-05 | 0        | 2.56E-04 | 0        | 1.62E-04 | 0        | 1.12E-04 |
| 0        | 0        | 0.012023 | 0        | 0        | 0        | 0        | 0        | 0        | 2.20E-05 | 0        | 0        | 0        | 0        |
| 0        | 0        | 9.94E-04 | 0        | 0        | 0        | 0        | 0        | 0        | 0        | 0        | 0        | 0        | 0        |
| 3.47E-04 | 0        | 1.70E-05 | 3.90E-05 | 4.43E-04 | 1.78E-04 | 0.001384 | 0        | 0        | 3.40E-05 | 0        | 4.40E-05 | 1.20E-05 | 2.50E-05 |
| 7.30E-05 | 0        | 5.60E-05 | 0        | 3.24E-04 | 4.90E-04 | 8.63E-04 | 2.50E-05 | 0        | 2.39E-04 | 0.00597  | 0        | 0        | 0        |
| 0.012106 | 0        | 0        | 0        | 0        | 0        | 0        | 1.23E-04 | 0        | 0        | 0        | 0        | 0        | 0        |
| 0.025273 | 0.009737 | 0.062176 | 0.014989 | 0.013559 | 0.025997 | 0.029974 | 0.041488 | 0.016236 | 0.031192 | 0.142512 | 0.013104 | 0.018464 | 0.008145 |

| H003     | H065     | H099     | H036     | H060     | H058     | H098     | H071     | H120     | H126     | H091     | H116     | H066     | H142     |
|----------|----------|----------|----------|----------|----------|----------|----------|----------|----------|----------|----------|----------|----------|
| 0.074233 | 0.072723 | 0.064873 | 0.064307 | 0.057949 | 0.057738 | 0.053695 | 0.048119 | 0.046864 | 0.046251 | 0.045224 | 0.044149 | 0.04124  | 0.041071 |
| 0.173151 | 0.089012 | 0.163244 | 0.378238 | 0.263805 | 0.190834 | 0.179211 | 0.256932 | 0.185267 | 0.228549 | 0.20674  | 0.22174  | 0.115703 | 0.166961 |
| 0.16245  | 0.111145 | 0.068425 | 0.032536 | 0.048608 | 0.03305  | 0.099117 | 0.048472 | 0.076538 | 0.075471 | 0.079026 | 0.010106 | 0.271903 | 0.067573 |
| 0.039297 | 0.053297 | 0.03253  | 0.125776 | 0.042168 | 0.032244 | 0.087582 | 0.080228 | 0.044496 | 0.102461 | 0.190473 | 0.103716 | 0.04857  | 0.239383 |
| 0.013415 | 0.011129 | 0.032192 | 0.038396 | 0.035559 | 0.039371 | 0.073266 | 0.108192 | 0.006021 | 0.026966 | 0.037864 | 0.126458 | 0.017642 | 0.076468 |
| 0.058517 | 0.059256 | 0.037914 | 0.095947 | 0.033044 | 0.03874  | 0.030769 | 0.038293 | 0.030526 | 0.080636 | 0.044333 | 0.099478 | 0.044874 | 0.054217 |
| 0.074396 | 0.168717 | 0.231133 | 0.049861 | 0.179217 | 0.018596 | 0.127692 | 0.12309  | 0.081579 | 0.076065 | 0.064795 | 0.085139 | 0.038311 | 0.044487 |
| 0.060066 | 0.067093 | 0.025398 | 0.025807 | 0.020176 | 0.0238   | 0.009047 | 0.036319 | 0.013574 | 0.076315 | 0.039003 | 0.029385 | 0.049127 | 0.031448 |
| 0.100679 | 0.177465 | 0.04888  | 0.027137 | 0.042882 | 0.016661 | 0.12161  | 0.013396 | 0.133697 | 0.033342 | 0.021679 | 0.012505 | 0.063967 | 0.047271 |
| 0.023884 | 0.017583 | 0.014173 | 0.022865 | 0.025891 | 0.02261  | 0.018255 | 0.009327 | 0.017255 | 0.027759 | 0.051268 | 0.031429 | 0.013681 | 0.044374 |
| 0.03306  | 0.015645 | 0.003713 | 0.009156 | 0.013784 | 0.011524 | 0.016301 | 0.007257 | 0.0394   | 0.005898 | 0.002548 | 0.002416 | 0.025821 | 0.018533 |
| 0.006773 | 0.014304 | 0.010656 | 0.005999 | 0.005996 | 0.004357 | 0.002548 | 0.003842 | 0.003287 | 0.009882 | 0.013718 | 0.023959 | 0.003101 | 0.015349 |
| 0.01428  | 0.010411 | 0.006285 | 0.006005 | 0.001161 | 0        | 4.83E-04 | 0.001498 | 0.00419  | 0.00511  | 0.004788 | 0.003118 | 0.005665 | 0.009997 |
| 6.33E-04 | 0.003166 | 0.012488 | 0.004227 | 0.003334 | 0.004362 | 0.009809 | 0.012048 | 8.91E-04 | 0.006122 | 0.005584 | 0.027179 | 0.001861 | 0.014668 |
| 0.003024 | 0.002429 | 0.001863 | 0.020381 | 0.005941 | 0.003042 | 0.006596 | 0.017311 | 0.004081 | 0.014051 | 0.004005 | 0.019578 | 0.001912 | 0.012098 |
| 0.004475 | 0.00468  | 0.030809 | 0.00558  | 0.016919 | 0.006855 | 0.019103 | 0.027122 | 0.004945 | 0.010159 | 0.018767 | 0.00739  | 0.006889 | 0.004747 |
| 0.00511  | 0.009128 | 0.002826 | 0.004142 | 0.004004 | 0.008553 | 0.002925 | 0.001255 | 0.005423 | 0.005439 | 0.004646 | 0.002127 | 0.006928 | 0.01129  |
| 0.05713  | 0.005277 | 0.003104 | 1.74E-04 | 0.002724 | 0        | 0.01027  | 0.016972 | 0.232557 | 0.001362 | 0        | 1.50E-05 | 0.00296  | 0.002222 |
| 1.68E-04 | 0.007186 | 0.011511 | 0.007268 | 0.001085 | 0.003079 | 0.051074 | 0.02666  | 8.73E-04 | 0.010793 | 0.00169  | 0.001985 | 6.91E-04 | 0        |
| 0.005067 | 0.009567 | 0.018433 | 0.002019 | 8.94E-04 | 3.93E-04 | 7.66E-04 | 3.19E-04 | 6.00E-04 | 7.37E-04 | 0.003037 | 6.10E-05 | 0.001766 | 0.02078  |
| 0.009185 | 0.002125 | 0.003702 | 0        | 0.017302 | 0.098958 | 7.94E-04 | 0.002976 | 0.001598 | 4.22E-04 | 0.003076 | 8.90E-05 | 0.013201 | 0        |
| 0.003801 | 0.002225 | 0.003025 | 0.006483 | 0.00565  | 0.004478 | 0.006614 | 0.006014 | 0.003365 | 0.004024 | 0.003274 | 0.007654 | 0.003149 | 0.006567 |
| 0.008138 | 0.00927  | 0.05066  | 0        | 0.012265 | 0.011747 | 0.006891 | 5.47E-04 | 0.005473 | 0.002539 | 0.010891 | 3.66E-04 | 0.054544 | 0.002412 |
| 5.43E-04 | 0.001483 | 0.008788 | 0.009568 | 0.008001 | 0.001901 | 0.008819 | 0.018306 | 0.003151 | 0.001095 | 0.002579 | 0.00389  | 0.001482 | 0.005974 |
| 0.003236 | 0.001047 | 3.15E-04 | 0.010729 | 0.007315 | 0.004524 | 0.004223 | 0.005143 | 0.002711 | 0.002786 | 0.001404 | 0.010779 | 3.10E-04 | 0.005396 |
| 5.89E-04 | 2.57E-04 | 0.007403 | 2.35E-04 | 0.00218  | 0.00197  | 0.006909 | 0.013268 | 6.85E-04 | 0.002032 | 0.006219 | 0.012568 | 0.001294 | 0.004892 |
| 0.003667 | 9.70E-04 | 0.002513 | 0.006202 | 0.004131 | 0.001764 | 0.00135  | 0.004582 | 0.002375 | 0.004823 | 0.003066 | 0.005961 | 0.001022 | 0.001242 |
| 0        | 3.63E-04 | 2.46E-04 | 0        | 3.60E-05 | 0        | 0        | 2.40E-04 | 0        | 0        | 0        | 0        | 0        | 0        |
| 0.002198 | 0.002076 | 0.003725 | 0.004995 | 0.002555 | 0.001866 | 0.003118 | 0.011788 | 0.002493 | 0.006939 | 0.004506 | 0.007664 | 7.54E-04 | 0.003405 |
| 6.67E-04 | 0.00256  | 0.014709 | 0.009473 | 0.001488 | 0.003643 | 8.50E-04 | 0.004662 | 0.001511 | 0.005523 | 6.18E-04 | 0.008846 | 0.002521 | 0.007699 |
| 0.00569  | 0.010277 | 0.012546 | 0.00288  | 0.006197 | 0.002492 | 0.001718 | 0.005324 | 0.007751 | 0.006185 | 0.003348 | 5.57E-04 | 0.009167 | 0.00339  |
| 0.004895 | 0.001331 | 0.00242  | 5.60E-05 | 0.010669 | 0.060968 | 6.02E-04 | 9.08E-04 | 0.00105  | 2.45E-04 | 0.002002 | 1.33E-04 | 0.008004 | 5.10E-05 |
| 0.001006 | 5.74E-04 | 0.00414  | 1.82E-04 | 0.003429 | 6.97E-04 | 0.009685 | 0.008254 | 0.00107  | 0.005143 | 9.35E-04 | 0.053977 | 0.001558 | 0.002006 |
| 0.001284 | 0.001923 | 7.72E-04 | 1.71E-04 | 0.000649 | 0.001017 | 5.73E-04 | 5.20E-04 | 7.77E-04 | 7.20E-04 | 0.004926 | 1.95E-04 | 0.007772 | 6.95E-04 |
| 6.75E-04 | 3.41E-04 | 0.002017 | 0        | 5.04E-04 | 0        | 1.58E-04 | 3.30E-05 | 1.16E-04 | 1.76E-04 | 5.86E-04 | 2.20E-05 | 0.003937 | 1.46E-04 |
| 4.37E-04 | 1.63E-04 | 3.23E-04 | 6.90E-05 | 0.001059 | 0.005105 | 3.50E-05 | 0        | 4.90E-05 | 0        | 2.57E-04 | 0        | 8.52E-04 | 2.40E-05 |
| 3.62E-04 | 9.74E-04 | 0.004336 | 0.002349 | 0.004819 | 0.00456  | 0.001046 | 0.001697 | 3.17E-04 | 0.003339 | 0.002576 | 0.006046 | 0.002773 | 0.001477 |
| 0.002023 | 4.01E-04 | 9.64E-04 | 0.004219 | 0.001525 | 0.001307 | 0.001355 | 0.005889 | 0.002356 | 0.006284 | 0.00093  | 0.004709 | 6.20E-04 | 0.003057 |
| 8.82E-04 | 8.05E-04 | 0.002486 | 0.001809 | 0.001073 | 3.08E-04 | 0.007691 | 0.003302 | 0.002531 | 0.004522 | 0.004223 | 0.004121 | 8.96E-04 | 0.003067 |
| 1.08E-04 | 0.0024   | 9.33E-04 | 2.34E-04 | 0.006673 | 0.003827 | 9.81E-04 | 0.002104 | 0.006332 | 0.039478 | 0.006175 | 8.76E-04 | 0.009377 | 3.06E-04 |
| 0.001044 | 2.02E-04 | 9.15E-04 | 7.10E-05 | 0.00266  | 0.010946 | 1.68E-04 | 3.13E-04 | 2.49E-04 | 2.63E-04 | 2.71E-04 | 1.60E-05 | 0.002015 | 5.80E-05 |
| 4.82E-04 | 9.90E-04 | 6.02E-04 | 3.58E-04 | 0        | 0        | 3.89E-04 | 2.85E-04 | 1.51E-04 | 1.85E-04 | 6.51E-04 | 1.43E-04 | 2.83E-04 | 0.003636 |
| 0        | 0.005523 | 2.50E-05 | 0        | 4.10E-04 | 0        | 0        | 0.002775 | 0        | 0.001155 | 0.002139 | 2.74E-04 | 8.51E-04 | 1.18E-04 |
| 0        | 0.00536  | 0.001801 | 1.61E-04 | 0        | 0        | 0        | 3.30E-05 | 0        | 8.10E-05 | 0        | 0        | 0        | 0        |
| 0.001044 | 0.00126  | 0.002073 | 1.80E-04 | 0.008705 | 0.023921 | 5.30E-04 | 0        | 9.82E-04 | 2.27E-04 | 9.92E-04 | 2.00E-05 | 0.007972 | 2.10E-05 |
| 0.001601 | 0.001321 | 0.001562 | 0.001709 | 0.002595 | 0        | 1.32E-04 | 0.001016 | 8.52E-04 | 0.005686 | 0.004773 | 3.61E-04 | 0        | 3.35E-04 |
| 5.48E-04 | 0.001224 | 6.94E-04 | 1.09E-04 | 3.50E-04 | 9.55E-04 | 3.60E-05 | 4.30E-05 | 8.50E-05 | 0.003868 | 4.13E-04 | 0.001639 | 0        | 1.86E-04 |
| 0.002151 | 7.33E-04 | 9.14E-04 | 1.23E-04 | 0.004385 | 0.021755 | 3.17E-04 | 3.86E-04 | 5.25E-04 | 2.40E-05 | 9.89E-04 | 1.30E-05 | 0.003208 | 1.90E-05 |
| 4.41E-04 | 5.90E-05 | 2.01E-04 | 0        | 0.001016 | 0.002502 | 1.52E-04 | 3.66E-04 | 5.50E-05 | 0        | 1.21E-04 | 0        | 4.21E-04 | 0        |
| 0.002469 | 0.001933 | 0.00156  | 5.76E-04 | 0        | 0.001386 | 0        | 6.10E-05 | 2.00E-05 | 9.43E-04 | 9.20E-05 | 0        | 0        | 1.64E-04 |
| 8.34E-04 | 4.61E-04 | 2.16E-04 | 0        | 0.0011   | 0.005064 | 1.25E-04 | 2.80E-05 | 3.00E-04 | 7.88E-04 | 0.012693 | 6.47E-04 | 0.00411  | 0.009133 |
| 0.001046 | 0.010264 | 0.001243 | 3.90E-04 | 2.11E-04 | 0        | 0.002224 | 2.55E-04 | 4.13E-04 | 0.002355 | 0.001745 | 8.59E-04 | 4.58E-04 | 0.001435 |
| 8.70E-05 | 3.11E-04 | 2.70E-05 | 0.001028 | 0.003215 | 1.02E-04 | 3.30E-05 | 7.34E-04 | 0.001506 | 0.004708 | 0.001419 | 5.28E-04 | 0.003462 | 2.00E-05 |
| 7.10E-05 | 4.97E-04 | 7.47E-04 | 1.35E-04 | 2.50E-04 | 0.001211 | 1.96E-04 | 0.002583 | 6.15E-04 | 8.87E-04 | 0.005877 | 7.19E-04 | 0.002887 | 2.00E-04 |
| 0        | 1.60E-05 | 0        | 3.57E-04 | 0        | 0        | 0        | 2.34E-04 | 8.40E-05 | 2.90E-05 | 0        | 2.90E-05 | 0        | 0.001179 |

|          |          |          |          |          |          |          |          |          |          |          |          |          |          |
|----------|----------|----------|----------|----------|----------|----------|----------|----------|----------|----------|----------|----------|----------|
| 4.81E-04 | 6.20E-05 | 7.31E-04 | 1.16E-04 | 7.86E-04 | 0.001619 | 0        | 2.77E-04 | 2.77E-04 | 4.68E-04 | 0.022927 | 4.30E-05 | 0        | 1.61E-04 |
| 0.001246 | 8.48E-04 | 0.002865 | 0        | 0.007715 | 0.007012 | 6.38E-04 | 3.50E-05 | 9.12E-04 | 1.61E-04 | 8.10E-04 | 0        | 0.007423 | 0        |
| 3.03E-04 | 1.90E-05 | 6.50E-05 | 5.70E-05 | 0        | 9.90E-05 | 4.20E-05 | 3.50E-05 | 6.61E-04 | 0        | 0.002768 | 2.00E-05 | 7.26E-04 | 5.21E-04 |
| 9.06E-04 | 4.63E-04 | 0.001706 | 0        | 0.005626 | 0.02132  | 4.24E-04 | 3.90E-05 | 6.27E-04 | 9.00E-05 | 4.30E-04 | 0        | 0.005952 | 0        |
| 7.98E-04 | 2.82E-04 | 2.91E-04 | 5.40E-05 | 0.001437 | 0.00981  | 6.90E-05 | 3.23E-04 | 1.34E-04 | 2.70E-05 | 9.27E-04 | 3.70E-05 | 0.001577 | 2.10E-05 |
| 0        | 0        | 0        | 0.004193 | 0        | 0        | 0        | 0        | 2.49E-04 | 8.90E-05 | 0        | 1.30E-05 | 0        | 0        |
| 0.001372 | 3.03E-04 | 3.23E-04 | 0        | 0.002226 | 0.010805 | 1.65E-04 | 0        | 2.20E-04 | 2.70E-05 | 3.81E-04 | 2.10E-05 | 0.001102 | 0        |
| 0        | 0        | 0        | 7.70E-05 | 0        | 0        | 0        | 0        | 0        | 0        | 0        | 8.70E-05 | 0        | 6.30E-05 |
| 0        | 0        | 0        | 0        | 0        | 0        | 4.03E-04 | 3.20E-05 | 0        | 4.70E-05 | 2.01E-04 | 1.51E-04 | 7.31E-04 | 0        |
| 0.001063 | 1.10E-04 | 2.36E-04 | 0        | 0.001854 | 0.010278 | 1.02E-04 | 0        | 1.96E-04 | 0        | 2.10E-04 | 0        | 0.001375 | 0        |
| 0        | 0        | 0        | 0        | 0        | 0        | 0        | 0        | 0        | 0        | 0        | 0        | 0        | 0        |
| 0.001068 | 1.36E-04 | 3.47E-04 | 0        | 0.001669 | 0.008638 | 5.40E-05 | 0        | 1.40E-04 | 2.47E-04 | 8.00E-05 | 1.60E-05 | 0.001257 | 0        |
| 8.70E-05 | 9.20E-05 | 0        | 0        | 9.00E-05 | 3.86E-04 | 4.20E-05 | 1.53E-04 | 1.89E-04 | 2.60E-05 | 1.49E-04 | 0        | 4.84E-04 | 0        |
| 3.41E-04 | 1.17E-04 | 1.34E-04 | 0        | 9.74E-04 | 0.005045 | 1.38E-04 | 6.60E-05 | 9.50E-05 | 1.70E-05 | 1.38E-04 | 0        | 9.22E-04 | 0        |
| 7.70E-04 | 1.49E-04 | 3.07E-04 | 0        | 0.001108 | 0.004749 | 6.60E-05 | 2.90E-05 | 1.47E-04 | 6.20E-05 | 2.20E-04 | 0        | 5.39E-04 | 0        |
| 0        | 1.21E-04 | 0        | 1.16E-04 | 0        | 0        | 3.70E-05 | 1.10E-04 | 0        | 6.56E-04 | 0        | 0        | 1.35E-04 | 0        |
| 0        | 0        | 0        | 0        | 0        | 0        | 0        | 0        | 0        | 0        | 0        | 0        | 0        | 0        |
| 0        | 0        | 0        | 0        | 0        | 0        | 0        | 0        | 0        | 0        | 0        | 0        | 0        | 0        |
| 3.58E-04 | 2.19E-04 | 0.001689 | 4.50E-05 | 4.86E-04 | 0        | 4.56E-04 | 0        | 1.22E-04 | 0        | 1.57E-04 | 0        | 0.021492 | 2.20E-05 |
| 3.72E-04 | 2.34E-04 | 1.47E-04 | 0        | 0.001113 | 0.001221 | 1.82E-04 | 3.90E-05 | 8.40E-05 | 0        | 1.43E-04 | 0        | 0.001674 | 0        |
| 0        | 0        | 0        | 0        | 0        | 4.79E-04 | 0        | 0        | 0        | 0        | 8.02E-04 | 0        | 0        | 3.40E-05 |
| 0.019823 | 0.015913 | 0.032106 | 0.00467  | 0.047358 | 0.123756 | 0.009349 | 0.017541 | 0.012335 | 0.037241 | 0.036703 | 0.013978 | 0.043099 | 0.007931 |

| H139     | H011     | H008     | H053     | H100     | H032     | H073     | H039     | H079     | H019     | H130     | H041     | H125     | ID..96       |
|----------|----------|----------|----------|----------|----------|----------|----------|----------|----------|----------|----------|----------|--------------|
| 0.032768 | 0.026782 | 0.025357 | 0.021742 | 0.017473 | 0.014875 | 0.014747 | 0.012477 | 0.01223  | 0.011099 | 0.008956 | 0.008395 | 0.004286 | Neisseria    |
| 0.120755 | 0.24922  | 0.422988 | 0.20971  | 0.327966 | 0.153314 | 0.356829 | 0.221384 | 0.364998 | 0.371572 | 0.398245 | 0.359613 | 0.285189 | Prevotella   |
| 0.162873 | 0.081617 | 0.059741 | 0.011609 | 0.093932 | 0.046046 | 0.110028 | 0.045382 | 0.035469 | 0.0499   | 0.104895 | 0.010335 | 0.006316 | Streptococc  |
| 0.256954 | 0.114663 | 0.103679 | 0.00545  | 0.125034 | 0.073577 | 0.107047 | 0.100162 | 0.182396 | 0.13266  | 0.172886 | 0.151409 | 0.0634   | Veillonella  |
| 0.008147 | 0.015626 | 0.069994 | 0.002081 | 0.054538 | 0.091447 | 0.046029 | 0.087173 | 0.050313 | 0.042006 | 0.05206  | 0.147774 | 0.065704 | Leptotrichia |
| 0.017666 | 0.020032 | 0.018019 | 9.23E-04 | 0.023653 | 0.086468 | 0.019596 | 0.165585 | 0.055486 | 0.061179 | 0.013134 | 0.011699 | 0.004519 | Fusobacteri  |
| 0.028843 | 0.098921 | 0.087014 | 0.002406 | 0.105068 | 0.04216  | 0.080563 | 0.086287 | 0.069292 | 0.125147 | 0.044226 | 0.036492 | 0.016911 | Alloprevote  |
| 0.02049  | 0.014802 | 0.00467  | 0.006551 | 0.002108 | 0.0169   | 0.016547 | 0.066414 | 0.011881 | 0.005754 | 0.010496 | 0.001839 | 0.001707 | Porphyrom    |
| 0.130926 | 0.014844 | 0.011085 | 0.004541 | 0.042906 | 0.010794 | 0.032837 | 0.024439 | 0.009212 | 0.014849 | 0.009816 | 0.003457 | 0.003771 | Haemophilu   |
| 0.075492 | 0.030218 | 0.021047 | 5.92E-04 | 0.024088 | 0.033397 | 0.033634 | 0.019659 | 0.020225 | 0.024684 | 0.023573 | 0.039701 | 0.013023 | Actinomyce   |
| 0.019654 | 0.027769 | 0.00232  | 3.51E-04 | 0.004476 | 0.004963 | 0.009075 | 0.002644 | 0.009043 | 0.009016 | 0.004132 | 0.001753 | 5.69E-04 | Rothia       |
| 0.005331 | 0.006319 | 3.18E-04 | 3.55E-04 | 8.21E-04 | 0.019637 | 0.004741 | 0.012284 | 6.17E-04 | 0.00307  | 0.002079 | 4.11E-04 | 6.90E-05 | Capnocytop   |
| 0.015797 | 0.001466 | 0.002045 | 3.51E-04 | 0.004329 | 0.003914 | 0.001543 | 0.005536 | 0.001219 | 0.002497 | 0.003033 | 3.22E-04 | 7.90E-05 | Gemella      |
| 0.016042 | 4.58E-04 | 0.020668 | 3.26E-04 | 0.04667  | 0.006407 | 0.026897 | 0.009819 | 0.017629 | 0.008444 | 0.022089 | 0.043153 | 0.018762 | TM7x         |
| 0.004509 | 0.001909 | 0.009261 | 1.06E-04 | 0.01328  | 0.011184 | 0.011655 | 0.015358 | 0.015665 | 0.015047 | 0.006322 | 0.017166 | 0.007369 | Lachnoanae   |
| 0.004628 | 0.012987 | 0.012643 | 0        | 0.01351  | 0.011336 | 0.010112 | 0.007304 | 0.020671 | 0.023212 | 0.00337  | 0.004755 | 0.002317 | Campylobac   |
| 0.008889 | 0.007122 | 0.002119 | 0        | 0.004559 | 0.001405 | 0.008708 | 0.006349 | 0.00445  | 0.005534 | 0.007492 | 0.001316 | 5.82E-04 | Granulicate  |
| 0.005782 | 0.006548 | 0.002813 | 0        | 1.03E-04 | 0.001866 | 0.001171 | 1.47E-04 | 6.60E-05 | 6.66E-04 | 5.92E-04 | 3.20E-05 | 0        | Actinobacil  |
| 1.47E-04 | 3.19E-04 | 2.95E-04 | 0.001653 | 0.002719 | 0.006778 | 3.60E-05 | 2.52E-04 | 0.016141 | 2.70E-04 | 3.30E-05 | 8.90E-05 | 2.19E-04 | g__Abscon    |
| 0.011427 | 0.009872 | 7.91E-04 | 0        | 6.80E-04 | 0.002924 | 0.00205  | 3.80E-04 | 0        | 4.30E-04 | 0.001998 | 3.05E-04 | 0        | Lautropia    |
| 3.12E-04 | 0.022654 | 4.29E-04 | 0.151285 | 0.001075 | 0.002817 | 1.90E-04 | 2.50E-05 | 1.10E-04 | 1.03E-04 | 4.80E-05 | 6.70E-05 | 0.115235 | Bacteroides  |
| 0.004281 | 0.001525 | 0.00739  | 0        | 0.010413 | 0.002966 | 0.009483 | 0.007667 | 0.008021 | 0.008567 | 0.005615 | 0.00742  | 0.003947 | Oribacteriu  |
| 0.003951 | 0.004061 | 8.97E-04 | 0.017083 | 0.003396 | 0.001571 | 9.85E-04 | 1.60E-04 | 1.38E-04 | 5.59E-04 | 6.28E-04 | 7.25E-04 | 0.006143 | Pseudomon    |
| 0.004591 | 0.006983 | 0.033493 | 8.04E-04 | 0.008667 | 0.00171  | 0.009641 | 0.008348 | 0.032959 | 0.0163   | 0.012066 | 0.04702  | 0.02177  | Megasphae    |
| 0.001096 | 6.47E-04 | 0.007281 | 0.002055 | 0.015405 | 9.66E-04 | 0.005333 | 0.04148  | 0.012633 | 0.012136 | 0.00358  | 0.007037 | 0.003653 | Stomatobac   |
| 3.46E-04 | 4.38E-04 | 0.00402  | 2.29E-04 | 0.007034 | 0.018768 | 0.006214 | 0.005246 | 0.003864 | 0.00441  | 0.012583 | 0.013986 | 0.004387 | Selenomona   |
| 4.49E-04 | 0.001584 | 7.72E-04 | 0        | 0.002127 | 0.002287 | 0.001616 | 0.005769 | 0.004297 | 0.001625 | 5.09E-04 | 0.001606 | 0.001106 | Peptostrept  |
| 0        | 3.71E-04 | 0        | 0        | 0        | 2.60E-05 | 0        | 0        | 0        | 0        | 0        | 0        | 6.80E-05 | Moraxella    |
| 0.002344 | 0.006997 | 0.011193 | 0        | 0.001832 | 0.003121 | 0.003137 | 0.00214  | 0.004047 | 0.009167 | 0.004924 | 0.009271 | 0.003862 | Solobacteri  |
| 0.002173 | 0.001067 | 0.005071 | 0.004002 | 0.002575 | 0.009664 | 0.006668 | 0.011616 | 0.003238 | 0.001427 | 0.001091 | 0.006449 | 0.005946 | Clostridia_U |
| 2.29E-04 | 0.001168 | 4.12E-04 | 1.18E-04 | 3.85E-04 | 0.009928 | 0.002872 | 9.27E-04 | 0.001358 | 4.01E-04 | 0.007481 | 2.27E-04 | 2.01E-04 | Aggregatiba  |
| 3.70E-05 | 0.014931 | 1.76E-04 | 0.089917 | 5.05E-04 | 3.53E-04 | 2.00E-05 | 5.30E-05 | 8.30E-05 | 1.28E-04 | 0        | 6.10E-05 | 0.064617 | Faecalibacte |
| 0        | 0        | 0.013285 | 1.29E-04 | 0.011457 | 5.99E-04 | 0.007773 | 0.004901 | 0.004271 | 0.006846 | 0.010126 | 0.018266 | 0.008855 | Lachnospira  |
| 6.20E-05 | 0.046813 | 4.54E-04 | 0        | 1.29E-04 | 0.059651 | 0.001515 | 4.96E-04 | 2.77E-04 | 4.74E-04 | 0.001478 | 3.26E-04 | 1.50E-04 | Corynebact   |
| 3.07E-04 | 3.09E-04 | 2.00E-05 | 0        | 1.31E-04 | 2.18E-04 | 1.05E-04 | 0        | 0        | 0        | 0        | 3.40E-05 | 0        | Halomonas    |
| 0        | 0.001569 | 0        | 0.017348 | 2.80E-05 | 0.060334 | 0        | 1.05E-04 | 0        | 4.70E-05 | 0        | 0        | 0.005258 | Muribacula   |
| 7.18E-04 | 0.0015   | 3.64E-04 | 0        | 5.98E-04 | 0.029053 | 5.24E-04 | 0.003481 | 0.001387 | 0.005544 | 3.81E-04 | 2.77E-04 | 1.52E-04 | Tannerella   |
| 0.001634 | 0.00365  | 0.002709 | 1.11E-04 | 0.003496 | 0.001578 | 0.003413 | 0.001814 | 0.003214 | 0.003666 | 0.001168 | 0.004294 | 0.001924 | [Eubacteriu  |
| 0.007978 | 0.005913 | 0.020647 | 0        | 0.002898 | 0.001087 | 0.005754 | 0.001306 | 0.006065 | 0.01023  | 0.006805 | 0.006945 | 0.002511 | Atopobium    |
| 0.003476 | 0.001308 | 3.25E-04 | 0        | 3.67E-04 | 0.002932 | 0.00661  | 9.10E-04 | 5.73E-04 | 7.40E-04 | 0.002936 | 0        | 0        | Treponema    |
| 4.10E-05 | 0.003054 | 5.80E-05 | 0.019546 | 1.43E-04 | 0.016    | 1.31E-04 | 1.60E-05 | 0        | 0        | 0        | 2.40E-05 | 0.013823 | Lachnospira  |
| 4.75E-04 | 4.65E-04 | 9.40E-05 | 0        | 2.40E-05 | 6.20E-05 | 7.04E-04 | 2.20E-04 | 7.60E-05 | 1.12E-04 | 1.24E-04 | 9.00E-05 | 0        | Neisseriace  |
| 0        | 1.63E-04 | 9.44E-04 | 0        | 0.001184 | 0.006509 | 0.002054 | 4.00E-05 | 0.003578 | 0.001348 | 0.010571 | 6.79E-04 | 7.60E-05 | Saccharimo   |
| 0        | 7.37E-04 | 2.20E-05 | 0        | 0        | 2.40E-05 | 0        | 0        | 1.99E-04 | 0        | 4.00E-05 | 0        | 0        | Abiotrophia  |
| 0        | 0.001418 | 9.90E-05 | 0.050871 | 4.15E-04 | 1.34E-04 | 3.80E-05 | 0        | 0        | 5.20E-05 | 0        | 0        | 0        | Rhodococce   |
| 8.30E-05 | 0.001021 | 4.50E-05 | 0        | 5.20E-05 | 9.10E-04 | 9.50E-04 | 4.78E-04 | 9.57E-04 | 6.37E-04 | 0.001048 | 7.60E-05 | 7.80E-05 | Parvimonas   |
| 7.00E-05 | 0        | 6.40E-05 | 1.13E-04 | 1.75E-04 | 0.00736  | 1.96E-04 | 2.09E-04 | 0        | 4.80E-05 | 1.01E-04 | 1.03E-04 | 7.40E-05 | Johnsonella  |
| 0        | 0.00829  | 1.50E-04 | 0.040672 | 2.28E-04 | 1.38E-04 | 0        | 0        | 0        | 1.90E-05 | 0        | 3.60E-04 | 0.035719 | Fusicateniba |
| 0        | 0.001037 | 0        | 0.005776 | 2.60E-05 | 0.011379 | 0        | 0        | 0        | 0        | 0        | 6.30E-05 | 0.005235 | Lachnospira  |
| 0.001651 | 3.74E-04 | 5.47E-04 | 0        | 2.07E-04 | 0.001245 | 1.43E-04 | 0        | 1.10E-04 | 0        | 2.43E-04 | 0        | 0        | Lactobacilla |
| 6.30E-05 | 0.028385 | 3.00E-05 | 0        | 2.00E-04 | 5.00E-05 | 1.80E-04 | 5.81E-04 | 3.54E-04 | 1.50E-05 | 0.001448 | 0        | 0        | F0332        |
| 7.74E-04 | 0.001187 | 7.44E-04 | 0        | 7.95E-04 | 0.001193 | 2.40E-04 | 5.26E-04 | 2.08E-04 | 1.91E-04 | 0.001365 | 6.50E-05 | 0        | Bergeyella   |
| 0.001931 | 4.49E-04 | 4.30E-05 | 0        | 6.50E-05 | 3.43E-04 | 0.002508 | 6.11E-04 | 6.06E-04 | 1.89E-04 | 3.82E-04 | 0        | 0        | Filifactor   |
| 2.90E-05 | 4.70E-04 | 0.001525 | 4.53E-04 | 2.50E-05 | 0.019551 | 0.001669 | 9.70E-04 | 0.001842 | 6.57E-04 | 0.002002 | 0.004474 | 0.002538 | Dialister    |
| 0.001533 | 0        | 0        | 0        | 0        | 0        | 6.42E-04 | 4.43E-04 | 3.56E-04 | 1.15E-04 | 5.04E-04 | 5.50E-05 | 1.49E-04 | P5D1-392     |

|          |          |          |          |          |          |          |          |          |          |          |          |          |              |
|----------|----------|----------|----------|----------|----------|----------|----------|----------|----------|----------|----------|----------|--------------|
| 5.20E-05 | 1.13E-04 | 3.90E-05 | 0        | 1.23E-04 | 0.009269 | 5.85E-04 | 2.70E-04 | 5.70E-05 | 2.30E-05 | 6.64E-04 | 1.58E-04 | 1.37E-04 | Saccharimo   |
| 1.71E-04 | 0.001612 | 1.22E-04 | 0.024743 | 3.34E-04 | 2.49E-04 | 2.90E-05 | 2.90E-05 | 0        | 4.30E-05 | 0        | 2.20E-05 | 0        | Acinetobact  |
| 7.87E-04 | 0.002152 | 1.50E-05 | 0        | 9.00E-05 | 0.001039 | 3.97E-04 | 1.34E-04 | 3.30E-05 | 1.50E-04 | 6.50E-05 | 4.10E-05 | 0        | Kingella     |
| 0        | 0.002876 | 6.80E-05 | 0.029611 | 4.06E-04 | 1.64E-04 | 0        | 0        | 0        | 4.60E-05 | 0        | 0        | 0        | Sphingomon   |
| 0        | 0.002456 | 7.35E-04 | 0.016153 | 1.86E-04 | 5.20E-05 | 3.30E-05 | 0        | 0        | 2.30E-05 | 3.90E-05 | 4.80E-05 | 0.011602 | Bifidobacte  |
| 0        | 0.022632 | 0        | 0        | 0        | 0        | 0        | 0        | 0        | 0        | 0        | 0        | 0        | Leptotrichia |
| 0        | 0.00354  | 5.20E-05 | 0.016662 | 3.80E-05 | 1.04E-04 | 0        | 0        | 0        | 6.90E-05 | 4.10E-05 | 2.50E-05 | 0.01368  | Megamonas    |
| 1.40E-05 | 0        | 0        | 0        | 0        | 0        | 2.70E-05 | 5.10E-05 | 0        | 0        | 1.23E-04 | 2.80E-05 | 0        | Burkholderi  |
| 0        | 5.80E-05 | 0.002266 | 0        | 0.001599 | 0        | 0.002177 | 1.18E-04 | 0        | 0        | 0.00405  | 0.01901  | 0.008437 | Selenomona   |
| 0        | 0.002517 | 5.30E-05 | 0.014566 | 1.00E-04 | 6.60E-05 | 0        | 0        | 0        | 0        | 0        | 0        | 0.013068 | [Eubacteriu  |
| 0        | 0        | 0        | 0        | 0        | 0.001226 | 0        | 0        | 0        | 0        | 0        | 0        | 0        | Helicobacte  |
| 0        | 0.002027 | 2.40E-05 | 0.010294 | 5.30E-05 | 2.50E-05 | 0        | 0        | 0        | 0        | 0        | 0        | 0.008062 | Christensen  |
| 0        | 1.05E-04 | 0        | 4.76E-04 | 0        | 0.002714 | 0        | 0        | 0        | 0        | 1.08E-04 | 0        | 3.63E-04 | Lactobacill  |
| 2.70E-05 | 0.001577 | 3.30E-05 | 0.018777 | 2.10E-05 | 2.60E-05 | 2.20E-05 | 2.70E-05 | 0        | 0        | 0        | 0        | 0.004768 | Phascolaret  |
| 0        | 0.001838 | 0        | 0.010369 | 4.10E-05 | 5.70E-05 | 0        | 2.90E-05 | 0        | 0        | 0        | 0        | 0.007414 | Agathobact   |
| 0        | 0        | 0        | 0        | 0        | 8.40E-05 | 0        | 0        | 0        | 0        | 0        | 0        | 0        | Gracilibacte |
| 0        | 0        | 0        | 0        | 0        | 0.002216 | 0        | 7.60E-05 | 0        | 1.70E-05 | 0        | 0        | 6.70E-05 | Prevotellace |
| 0        | 0        | 0        | 0        | 0        | 9.64E-04 | 0        | 0        | 0        | 0        | 0        | 0        | 2.22E-04 | Mucispirillu |
| 2.23E-04 | 5.20E-05 | 1.50E-05 | 0        | 7.70E-05 | 4.90E-05 | 0        | 0        | 0        | 0        | 0        | 7.20E-05 | 0        | Serratia     |
| 0        | 4.29E-04 | 6.90E-05 | 0.010038 | 1.80E-04 | 6.20E-05 | 2.10E-05 | 0        | 0        | 0        | 0        | 0        | 0        | Acidovorax   |
| 0        | 7.30E-05 | 0        | 0        | 0        | 1.27E-04 | 0        | 0        | 0        | 0        | 3.68E-04 | 0        | 0        | Propionibac  |
| 0.010972 | 0.043911 | 0.006339 | 0.179052 | 0.012782 | 0.067588 | 0.021556 | 0.009693 | 0.008086 | 0.00684  | 0.015868 | 0.01058  | 0.129911 | Others       |

| CC65     | CC73     | CC62     | CC69     | CC63     | CC70     | CC25     | CC68     | CC16     | CC37     | CC58     | CC43     | CC21     | CC30     |
|----------|----------|----------|----------|----------|----------|----------|----------|----------|----------|----------|----------|----------|----------|
| 0.76896  | 0.712166 | 0.588361 | 0.581617 | 0.53836  | 0.488067 | 0.369455 | 0.363708 | 0.29854  | 0.253396 | 0.19576  | 0.18649  | 0.162127 | 0.141807 |
| 0.022522 | 0.033508 | 0.021991 | 0.079106 | 0.01582  | 0.112757 | 0.038868 | 0.012544 | 0.027723 | 0.059075 | 0.011941 | 0.006507 | 0.012298 | 0.050745 |
| 0.055051 | 0.010899 | 0.024237 | 0.031311 | 0.012657 | 0.027925 | 0.068849 | 0.366157 | 0.378677 | 0.221889 | 0.375883 | 0.172673 | 0.226931 | 0.152194 |
| 0.014371 | 0.018766 | 0.061172 | 0.041511 | 0.020623 | 0.11058  | 0.099727 | 0.06675  | 0.017243 | 0.131963 | 0.026157 | 0.30061  | 0.009071 | 0.192464 |
| 0.055568 | 0.052672 | 0.148817 | 0.004042 | 0.034344 | 0.03109  | 0.123741 | 0.059704 | 0.03328  | 0.017405 | 0.217451 | 3.38E-04 | 0.053236 | 0.280808 |
| 0.010812 | 0.042391 | 0.016534 | 0.104324 | 0.13533  | 0.03576  | 0.027109 | 0.00773  | 0.007419 | 0.012371 | 0.002737 | 6.57E-04 | 0.048074 | 0.006261 |
| 0.00146  | 0.001361 | 7.89E-04 | 0.001524 | 3.42E-04 | 9.87E-04 | 6.50E-04 | 0.001155 | 6.17E-04 | 6.25E-04 | 2.75E-04 | 1.35E-04 | 0.001637 | 0.004186 |
| 9.33E-04 | 0.003192 | 0.004958 | 0.05438  | 0.02101  | 0.020539 | 0.002305 | 0.005847 | 0.002278 | 0.019843 | 0.018953 | 0.003964 | 0.080374 | 0.001092 |
| 0.003558 | 0.051725 | 1.31E-04 | 0.004502 | 0.002743 | 0.002988 | 0.003254 | 0.0184   | 0.005518 | 0.006844 | 0.003063 | 2.13E-04 | 0.07035  | 0.004543 |
| 0.00559  | 0.004164 | 0.087244 | 0.004196 | 0.010516 | 0.003576 | 0.122201 | 0.00254  | 0.004505 | 0.084494 | 0.014562 | 0.004288 | 0.004655 | 0.072471 |
| 0.007715 | 0.004328 | 0.012071 | 0.039911 | 0.013982 | 0.020485 | 0.023616 | 0.006506 | 0.006337 | 0.032066 | 0.030073 | 0.001214 | 0.010611 | 0.009664 |
| 0.008144 | 0.003441 | 0.002563 | 0.00311  | 0.072033 | 0.002542 | 0.062626 | 0.003325 | 8.58E-04 | 0.006653 | 0.021126 | 0.006478 | 0.015858 | 0.013338 |
| 9.80E-04 | 0.007138 | 5.15E-04 | 8.49E-04 | 0.002594 | 0        | 0.00334  | 0.003358 | 0.102093 | 0.041794 | 0.012721 | 1.30E-05 | 0.062582 | 0.001569 |
| 0.002007 | 0.00171  | 4.12E-04 | 0.001367 | 0.001868 | 0        | 7.50E-04 | 0.00231  | 8.90E-05 | 0.002559 | 0.00143  | 1.00E-05 | 0.001262 | 0.005624 |
| 0.004812 | 0.008841 | 0.010999 | 0.011927 | 0.03242  | 0.004899 | 0.006938 | 0.008084 | 0.001853 | 0.006611 | 0.0019   | 3.50E-05 | 0.003918 | 0.006954 |
| 2.36E-04 | 0.005207 | 3.42E-04 | 2.14E-04 | 1.29E-04 | 0.048873 | 0.001065 | 0.001147 | 0.009752 | 0.001288 | 7.15E-04 | 8.47E-04 | 7.34E-04 | 0.003412 |
| 0.001557 | 0.006508 | 0.001277 | 0.001373 | 0.003129 | 0.023396 | 0.00345  | 0.001685 | 0.006004 | 0.013535 | 0.004179 | 0.020427 | 0.015261 | 0.002004 |
| 3.90E-05 | 0        | 0        | 6.40E-05 | 0        | 0        | 0        | 0.001277 | 1.00E-05 | 0        | 0        | 0        | 0.016482 | 0        |
| 0.001647 | 0        | 4.20E-05 | 5.80E-04 | 0.003066 | 0        | 2.70E-04 | 6.00E-05 | 0        | 0.002555 | 0        | 0        | 6.2E-04  | 1.47E-04 |
| 0.005534 | 0        | 5.62E-04 | 0.00228  | 0.003511 | 0.0069   | 0.001815 | 2.54E-04 | 2.80E-05 | 0.004029 | 0.018499 | 0.123697 | 0.022532 | 8.70E-05 |
| 0        | 0        | 0        | 0        | 0        | 0        | 0        | 0        | 0.002481 | 6.10E-05 | 0        | 0.001482 | 9.00E-05 | 0        |
| 0.001155 | 0.001009 | 0.002832 | 0.002783 | 0.016824 | 5.60E-05 | 0.001806 | 0.001996 | 0.001605 | 0.001409 | 0.001016 | 0        | 0.00526  | 0.001677 |
| 0        | 0        | 0        | 0        | 0        | 2.00E-05 | 0        | 0        | 7.20E-05 | 0        | 0        | 2.75E-04 | 6.80E-05 | 0        |
| 4.10E-05 | 9.80E-05 | 0        | 9.50E-05 | 0        | 0.002397 | 3.85E-04 | 0        | 9.61E-04 | 3.00E-04 | 1.88E-04 | 2.56E-04 | 0        | 2.02E-04 |
| 1.44E-04 | 8.97E-04 | 4.44E-04 | 0.002979 | 0.002696 | 7.42E-04 | 0.00177  | 2.67E-04 | 7.31E-04 | 0.002762 | 3.25E-04 | 1.10E-05 | 6.15E-04 | 0.002552 |
| 0.003051 | 1.02E-04 | 4.55E-04 | 2.31E-04 | 0.001162 | 0.005612 | 0.002023 | 0.009631 | 0.001795 | 0.003321 | 2.94E-04 | 8.00E-05 | 2.02E-04 | 0.011978 |
| 0.001105 | 0        | 3.02E-04 | 0.004546 | 0.006703 | 0.003011 | 0.001583 | 0.001069 | 0.005294 | 0.00486  | 1.09E-04 | 2.80E-05 | 0.003228 | 0.002097 |
| 0        | 0        | 0        | 0        | 5.90E-05 | 0        | 0        | 0        | 0        | 0        | 0        | 0        | 0        | 0        |
| 9.06E-04 | 0.002891 | 8.82E-04 | 0.001008 | 0.003393 | 0.00359  | 0.002563 | 1.31E-04 | 2.24E-04 | 0.00155  | 1.55E-04 | 3.00E-05 | 0.001352 | 0.003534 |
| 0.00388  | 1.78E-04 | 3.00E-04 | 9.11E-04 | 1.68E-04 | 0        | 0.001304 | 0.004095 | 5.44E-04 | 5.17E-04 | 7.00E-04 | 2.90E-05 | 5.28E-04 | 0.003349 |
| 0        | 0.003781 | 3.90E-05 | 0        | 0        | 0        | 0        | 4.98E-04 | 1.50E-05 | 0        | 0.002691 | 0        | 0.005909 | 4.00E-05 |
| 0        | 0        | 0        | 0        | 0        | 0        | 0        | 0        | 0.00093  | 0        | 0        | 6.09E-04 | 2.40E-05 | 0        |
| 0.002295 | 6.53E-04 | 0        | 0        | 8.60E-05 | 0        | 0        | 0.009738 | 9.50E-05 | 8.62E-04 | 0.001242 | 0        | 8.30E-05 | 3.90E-05 |
| 4.10E-05 | 1.44E-04 | 3.10E-05 | 1.12E-04 | 4.41E-04 | 0.023942 | 0.00404  | 0        | 0.002134 | 1.43E-04 | 0.003645 | 0        | 0.003752 | 1.39E-04 |
| 6.17E-04 | 0.003175 | 1.90E-04 | 6.60E-05 | 8.70E-05 | 0.003929 | 2.63E-04 | 0        | 0.026888 | 0.001362 | 7.54E-04 | 0.044794 | 0.071493 | 3.39E-04 |
| 0        | 0        | 0        | 0        | 0        | 0        | 0        | 0        | 0        | 0        | 0        | 0        | 0        | 0        |
| 8.92E-04 | 7.91E-04 | 1.99E-04 | 0.002525 | 0.008591 | 2.00E-05 | 2.52E-04 | 0        | 3.80E-04 | 1.32E-04 | 0.002814 | 5.90E-05 | 0.001516 | 6.23E-04 |
| 0.001426 | 0.001416 | 0.001323 | 0.002016 | 0.014619 | 2.70E-05 | 0.002571 | 9.91E-04 | 1.60E-04 | 0.002201 | 7.90E-04 | 0        | 3.96E-04 | 0.00268  |
| 1.76E-04 | 0.001325 | 2.30E-04 | 3.44E-04 | 1.10E-04 | 0.001185 | 3.83E-04 | 1.13E-04 | 0.00144  | 0.001256 | 7.14E-04 | 6.40E-05 | 2.49E-04 | 0.001584 |
| 0        | 5.00E-05 | 3.30E-05 | 0        | 7.20E-05 | 2.20E-05 | 0        | 1.27E-04 | 0.006024 | 2.99E-04 | 0        | 1.30E-05 | 7.70E-05 | 1.36E-04 |
| 0        | 0        | 0        | 3.70E-05 | 5.80E-05 | 0        | 2.48E-04 | 5.60E-05 | 2.63E-04 | 7.70E-05 | 0        | 7.30E-05 | 2.40E-05 | 0        |
| 0.004255 | 0.007984 | 1.07E-04 | 1.25E-04 | 0.002217 | 0.00397  | 6.45E-04 | 0        | 0.02231  | 0.001176 | 0.001303 | 0.013406 | 0.002229 | 7.93E-04 |
| 7.30E-04 | 0        | 0        | 0        | 0        | 0        | 0        | 9.72E-04 | 5.80E-05 | 0        | 1.53E-04 | 0        | 0        | 2.22E-04 |
| 3.67E-04 | 0.00236  | 3.50E-05 | 3.18E-04 | 0        | 0        | 0        | 0        | 2.60E-05 | 0.016199 | 4.98E-04 | 0.053655 | 0.040722 | 0        |
| 0        | 0        | 0        | 0        | 0        | 0        | 0        | 0        | 1.06E-04 | 0        | 0        | 3.18E-04 | 5.09E-04 | 0        |
| 0        | 1.36E-04 | 0        | 0.001144 | 5.58E-04 | 0        | 1.32E-04 | 6.70E-05 | 0.0033   | 0.001657 | 0        | 1.70E-05 | 0        | 0        |
| 0        | 3.51E-04 | 2.60E-04 | 7.31E-04 | 0.002328 | 0        | 8.03E-04 | 1.29E-04 | 0.001072 | 0.002138 | 5.10E-05 | 0        | 2.80E-04 | 4.57E-04 |
| 0        | 0        | 0        | 0        | 0        | 0        | 0        | 0        | 2.11E-04 | 0        | 0        | 1.20E-05 | 0        | 0        |
| 0        | 0        | 0        | 0        | 0        | 0        | 0        | 0        | 1.61E-04 | 0        | 0        | 1.50E-05 | 0        | 0        |
| 1.90E-05 | 1.80E-04 | 7.72E-04 | 8.76E-04 | 0        | 0        | 0        | 0.004532 | 0        | 0.018808 | 0.002988 | 0        | 0.019641 | 0        |
| 0        | 1.16E-04 | 0        | 5.60E-05 | 4.20E-05 | 0.002226 | 2.55E-04 | 0        | 6.83E-04 | 7.50E-05 | 3.29E-04 | 0        | 0.002995 | 2.70E-05 |
| 5.90E-05 | 0.001045 | 1.64E-04 | 1.89E-04 | 1.93E-04 | 3.30E-04 | 0        | 0        | 1.23E-04 | 2.98E-04 | 5.90E-04 | 0        | 0.002804 | 4.30E-05 |
| 0        | 0        | 2.21E-04 | 0.001064 | 3.65E-04 | 0        | 6.31E-04 | 0        | 0        | 7.53E-04 | 1.13E-04 | 0        | 0        | 1.10E-04 |
| 0        | 2.60E-05 | 1.02E-04 | 0        | 2.70E-05 | 0        | 0        | 0        | 2.24E-04 | 0        | 0        | 6.10E-05 | 0        | 0        |
| 7.78E-04 | 2.22E-04 | 0.001602 | 0.001581 | 3.22E-04 | 4.95E-04 | 0.005745 | 0.010063 | 1.80E-05 | 0.010698 | 0.005516 | 4.00E-05 | 0        | 0.009047 |

|          |          |          |          |          |          |          |          |          |          |          |          |          |          |
|----------|----------|----------|----------|----------|----------|----------|----------|----------|----------|----------|----------|----------|----------|
| 0        | 0        | 0        | 0        | 1.68E-04 | 0        | 0        | 0        | 2.60E-05 | 8.20E-05 | 0.008771 | 1.90E-05 | 2.10E-05 | 0        |
| 0        | 0        | 0        | 0        | 0        | 0        | 0        | 0        | 2.50E-05 | 0        | 0        | 1.80E-04 | 8.60E-05 | 0        |
| 2.04E-04 | 0        | 3.60E-05 | 3.70E-05 | 0        | 9.70E-05 | 0        | 0        | 4.20E-05 | 0        | 0        | 0.026317 | 5.33E-04 | 0        |
| 0        | 0        | 0        | 0        | 0        | 0        | 0        | 0        | 0        | 0        | 0        | 2.83E-04 | 1.60E-04 | 0        |
| 0        | 0        | 0        | 0        | 0        | 0        | 0        | 0        | 0.001187 | 0        | 0        | 4.28E-04 | 5.10E-05 | 0        |
| 0        | 0        | 0        | 0        | 0        | 0        | 0        | 0        | 0        | 0        | 0        | 0        | 0        | 0        |
| 0        | 0        | 0        | 0        | 0        | 0        | 0        | 0        | 1.00E-04 | 0        | 0        | 7.10E-05 | 0        | 0        |
| 0.001423 | 9.90E-05 | 0.00334  | 0.00437  | 5.25E-04 | 1.70E-05 | 0.008196 | 0.016177 | 0        | 0.003484 | 0.001863 | 0        | 0        | 0.003909 |
| 0        | 0        | 0        | 0        | 0        | 0        | 0        | 0        | 0        | 0        | 0        | 0        | 0        | 0        |
| 0        | 0        | 0        | 0        | 0        | 0        | 0        | 0        | 0        | 0        | 0        | 0        | 0        | 0        |
| 0        | 0        | 0        | 0        | 0        | 0        | 0        | 0        | 0        | 0        | 0        | 0        | 0        | 0        |
| 0        | 0        | 0        | 3.10E-05 | 0        | 0        | 0        | 0        | 6.00E-05 | 0        | 0        | 8.00E-05 | 0        | 0        |
| 0        | 0        | 4.00E-05 | 7.10E-05 | 0        | 0        | 1.23E-04 | 0        | 1.63E-04 | 0        | 0        | 5.10E-05 | 0        | 0        |
| 0        | 0        | 0        | 0        | 0        | 0        | 0        | 0        | 1.08E-04 | 0        | 0        | 4.10E-05 | 0        | 0        |
| 0        | 0        | 0        | 0        | 0        | 0        | 0        | 0        | 2.57E-04 | 0        | 0        | 9.50E-05 | 2.25E-04 | 0        |
| 5.10E-05 | 0        | 0        | 4.90E-05 | 0        | 0        | 0        | 0        | 0        | 0        | 0        | 0        | 4.09E-04 | 0        |
| 0        | 0        | 0        | 0        | 0        | 0        | 0        | 0        | 0        | 0        | 0        | 0        | 0        | 0        |
| 0        | 0        | 0        | 0        | 0        | 0        | 0        | 0        | 0        | 0        | 0        | 0        | 0        | 0        |
| 0        | 0        | 0        | 0        | 0        | 1.70E-05 | 0        | 0        | 2.70E-05 | 0        | 0        | 1.65E-04 | 8.30E-05 | 0        |
| 0        | 0        | 0        | 0        | 0        | 0        | 0        | 0        | 3.70E-05 | 0        | 0        | 1.70E-05 | 1.11E-04 | 0        |
| 0        | 0        | 0        | 0        | 0        | 2.00E-05 | 0        | 0        | 0        | 0        | 5.28E-04 | 0        | 0        | 0        |
| 0.004889 | 0.002954 | 0.003044 | 0.003517 | 0.013709 | 0.006911 | 0.00425  | 0.006807 | 0.014816 | 0.004525 | 0.004435 | 0.02833  | 0.015656 | 0.005053 |



| CC36     | CC28     | CC44     | CC71     | CC52     | CC72     | CC34     | CC27     | CC67     | CC12     | CC57     | CC45     | CC24     | CC60     |
|----------|----------|----------|----------|----------|----------|----------|----------|----------|----------|----------|----------|----------|----------|
| 0.137361 | 0.118725 | 0.094812 | 0.088889 | 0.079471 | 0.077624 | 0.07125  | 0.05704  | 0.040297 | 0.037202 | 0.03199  | 0.027911 | 0.026878 | 0.024765 |
| 0.031125 | 0.011597 | 0.206898 | 0.062176 | 0.026166 | 0.25178  | 0.152434 | 0.04186  | 0.095115 | 1.21E-04 | 0.036336 | 0.058974 | 0.409736 | 0.033424 |
| 0.225086 | 0.371889 | 0.198022 | 0.045098 | 0.173058 | 0.047573 | 0.134137 | 0.467579 | 0.656885 | 0.714943 | 0.296828 | 0.442777 | 0.036541 | 0.024965 |
| 0.069116 | 0.02011  | 0.076384 | 0.047184 | 0.046769 | 0.029091 | 0.021383 | 0.037124 | 0.032222 | 3.98E-04 | 0.048098 | 0.055463 | 0.146524 | 0.026422 |
| 0.026542 | 0.056396 | 0.192726 | 0.236417 | 0.092259 | 0.138139 | 0.05216  | 0.093491 | 0.03767  | 0.139306 | 0.054456 | 0.03915  | 0.11358  | 0.194866 |
| 0.059169 | 0.004896 | 0.019627 | 0.231498 | 0.016904 | 0.128023 | 0.0308   | 0.04033  | 0.002863 | 1.70E-05 | 0.041997 | 0.007525 | 0.051586 | 0.560584 |
| 0.004731 | 0        | 9.03E-04 | 8.11E-04 | 0.000649 | 0.009677 | 0.010911 | 0.001489 | 0.001018 | 4.70E-05 | 0.003977 | 0.002829 | 0.004726 | 6.65E-04 |
| 0.076047 | 0.014198 | 0.017707 | 0.002748 | 0.004948 | 0.012149 | 0.091319 | 0.036842 | 0.003367 | 1.18E-04 | 0.011703 | 0.058577 | 0.002609 | 0.024757 |
| 0.077918 | 0.00313  | 0.024913 | 0.136337 | 0.045198 | 0.131951 | 0.004399 | 0.008785 | 0.005083 | 0.062756 | 0.020891 | 0.030785 | 0.001924 | 6.17E-04 |
| 0.048895 | 0.006546 | 0.081953 | 0.004183 | 0.170728 | 0.013894 | 0.032903 | 0.012075 | 0.04061  | 0.003437 | 0.049452 | 0.011474 | 0.067678 | 0.003916 |
| 0.029631 | 0.249534 | 0.007655 | 0.032388 | 0.022829 | 0.020149 | 0.014476 | 0.019385 | 0.022809 | 0.022878 | 0.0437   | 0.023724 | 0.006825 | 9.28E-04 |
| 0.026384 | 0.013218 | 0.004874 | 0.003399 | 0.021422 | 0.013313 | 0.071893 | 0.004732 | 8.99E-04 | 2.10E-05 | 0.011907 | 0.042399 | 0.002569 | 0.026226 |
| 0.053076 | 0.058406 | 0.018656 | 0.028891 | 0.057782 | 0.013262 | 0.029859 | 0.043489 | 0.00996  | 0        | 0.044879 | 0.093253 | 0.001215 | 0.003215 |
| 0.006802 | 0.003953 | 0.008578 | 0.008014 | 7.34E-04 | 0.014786 | 0.06043  | 0.026546 | 0.002019 | 9.20E-05 | 0.002083 | 0.004281 | 0.006127 | 0.001191 |
| 7.84E-04 | 0.001975 | 0.006632 | 0.020722 | 0.008847 | 0.009724 | 0.010323 | 0.004111 | 0.002006 | 4.10E-05 | 0.002991 | 0.002584 | 0.011615 | 0.005798 |
| 0.003205 | 3.35E-04 | 0.001163 | 0.011081 | 0.007217 | 0.014767 | 6.50E-04 | 0.004617 | 5.67E-04 | 0        | 0.004745 | 0.002362 | 0.020699 | 7.23E-04 |
| 0.017247 | 0.008153 | 0.003609 | 0.011716 | 0.001624 | 0.006512 | 0.015139 | 0.025918 | 0.00374  | 0        | 0.004219 | 0.007711 | 0.01019  | 4.01E-04 |
| 0.043249 | 6.00E-05 | 0        | 1.10E-05 | 1.54E-04 | 0.008294 | 9.60E-05 | 3.22E-04 | 3.18E-04 | 0        | 0        | 3.13E-04 | 1.70E-05 | 0        |
| 1.68E-04 | 5.13E-04 | 0        | 0        | 2.01E-04 | 1.29E-04 | 0.007751 | 0.002094 | 1.97E-04 | 0        | 1.05E-04 | 0.00171  | 7.56E-04 | 1.17E-04 |
| 0.00401  | 0.001268 | 5.27E-04 | 0.001111 | 0.017963 | 0.001279 | 4.27E-04 | 0.003292 | 0.00109  | 0.01236  | 0.050373 | 0.004642 | 8.00E-05 | 4.87E-04 |
| 7.72E-04 | 0        | 0        | 0        | 0.002275 | 0        | 3.90E-05 | 2.20E-05 | 0        | 1.80E-05 | 0.003195 | 1.25E-04 | 2.10E-05 | 0        |
| 0.001113 | 0.00494  | 0.001468 | 0.002046 | 0.006394 | 0.003106 | 0.024185 | 0.004054 | 6.78E-04 | 0        | 0.003718 | 0.0043   | 0.005043 | 0.00518  |
| 8.40E-05 | 0        | 0        | 0        | 0.002454 | 0        | 0        | 0        | 0        | 2.07E-04 | 0        | 0        | 0        | 0        |
| 1.50E-05 | 0        | 0        | 0.001253 | 5.45E-04 | 8.84E-04 | 8.38E-04 | 7.50E-04 | 7.50E-05 | 0        | 0.003667 | 7.80E-04 | 0.009255 | 5.10E-05 |
| 4.57E-04 | 0.013387 | 0.001189 | 8.55E-04 | 0.003126 | 2.77E-04 | 0.0152   | 0.002332 | 2.66E-04 | 0        | 0.001867 | 0.001418 | 0.001448 | 0.012072 |
| 1.36E-04 | 5.03E-04 | 0.002    | 1.48E-04 | 0.003266 | 8.37E-04 | 0.002529 | 0.007205 | 0.006251 | 0        | 0.003121 | 0.003388 | 0.003152 | 0.002915 |
| 0.001064 | 0.007998 | 0.002374 | 0.0043   | 6.00E-05 | 0.005003 | 0.036364 | 0.001314 | 1.79E-04 | 6.20E-05 | 0.003551 | 0.003413 | 0.00593  | 0.004525 |
| 0        | 0        | 0        | 0        | 0        | 0        | 0        | 0        | 0        | 0        | 0        | 4.90E-05 | 0        | 0        |
| 0.001384 | 3.17E-04 | 5.04E-04 | 0.005636 | 1.42E-04 | 0.005311 | 0.005125 | 0.002528 | 5.87E-04 | 2.00E-05 | 0.001269 | 0.00157  | 0.027478 | 2.40E-04 |
| 0.001439 | 0.001157 | 3.12E-04 | 2.26E-04 | 0.001272 | 3.03E-04 | 0.010905 | 0.005256 | 0.002996 | 0        | 9.03E-04 | 0.002768 | 0.004033 | 9.50E-04 |
| 0.002849 | 1.09E-04 | 0        | 1.00E-05 | 5.37E-04 | 0        | 1.44E-04 | 0.004578 | 2.89E-04 | 0        | 0.00313  | 0.00331  | 1.84E-04 | 0        |
| 2.33E-04 | 0        | 1.92E-04 | 0        | 0.001002 | 0        | 0        | 0        | 0        | 0        | 2.71E-04 | 0        | 0        | 0        |
| 0        | 0        | 0        | 1.50E-05 | 2.60E-04 | 6.87E-04 | 0.011594 | 9.27E-04 | 0.001947 | 0        | 0        | 0.002536 | 0        | 0.001501 |
| 6.87E-04 | 4.56E-04 | 1.26E-04 | 1.17E-04 | 0.001297 | 3.72E-04 | 1.80E-05 | 9.64E-04 | 7.82E-04 | 0        | 0.062777 | 1.31E-04 | 6.22E-04 | 5.70E-05 |
| 0.023502 | 0.001221 | 0.001993 | 3.10E-05 | 0.044685 | 0.004864 | 1.80E-05 | 1.80E-05 | 0        | 2.53E-04 | 0.054377 | 0        | 1.78E-04 | 0        |
| 1.60E-05 | 0        | 0        | 0        | 7.60E-05 | 0        | 0        | 0        | 0        | 0        | 2.70E-05 | 0        | 0        | 0        |
| 6.21E-04 | 5.70E-05 | 0.002213 | 8.10E-05 | 0.001962 | 4.89E-04 | 0.020104 | 0.002131 | 4.95E-04 | 4.10E-05 | 0.002329 | 0.004122 | 5.19E-04 | 0.014031 |
| 4.55E-04 | 0.00105  | 0.002559 | 0.002425 | 5.15E-04 | 0.003356 | 0.008411 | 0.001366 | 3.07E-04 | 0        | 0.001309 | 0.002632 | 0.003336 | 0.002352 |
| 3.94E-04 | 0        | 4.99E-04 | 3.21E-04 | 3.65E-04 | 0.003027 | 0.005595 | 0.002097 | 0.001489 | 0        | 0.00156  | 0.001025 | 0.00399  | 2.32E-04 |
| 0.001745 | 3.50E-04 | 5.00E-05 | 1.54E-04 | 0.013134 | 0.001896 | 8.68E-04 | 0.002489 | 4.20E-05 | 0        | 7.63E-04 | 5.98E-04 | 6.67E-04 | 3.30E-04 |
| 5.70E-05 | 0        | 6.10E-05 | 0        | 0.001967 | 7.90E-05 | 1.07E-04 | 0        | 0        | 0        | 2.86E-04 | 0        | 0        | 0        |
| 6.35E-04 | 4.83E-04 | 0.00141  | 2.70E-05 | 0.004121 | 1.54E-04 | 2.20E-05 | 8.68E-04 | 1.84E-04 | 0        | 0.021103 | 0.00318  | 9.40E-05 | 0        |
| 0        | 0        | 0        | 0        | 0.002932 | 0.003264 | 0.00404  | 0.001373 | 8.16E-04 | 0        | 0.002287 | 0.001038 | 1.06E-04 | 0        |
| 7.08E-04 | 3.22E-04 | 0        | 0.002751 | 0.038298 | 0.006348 | 1.90E-05 | 9.48E-04 | 2.34E-04 | 0        | 6.80E-04 | 0.007164 | 0        | 0        |
| 0        | 0        | 0        | 0        | 3.79E-04 | 0        | 0        | 0        | 0        | 0        | 9.50E-05 | 0        | 0        | 5.50E-05 |
| 5.96E-04 | 7.00E-05 | 1.80E-04 | 1.50E-05 | 7.10E-05 | 1.22E-04 | 0.004011 | 1.09E-04 | 0        | 2.20E-05 | 0.004328 | 5.61E-04 | 2.60E-05 | 2.17E-04 |
| 7.07E-04 | 2.34E-04 | 2.33E-04 | 8.43E-04 | 0.017916 | 3.19E-04 | 0.016844 | 0.001698 | 7.20E-05 | 0        | 0.002185 | 0.001433 | 6.66E-04 | 0.005325 |
| 8.20E-05 | 0        | 0        | 0        | 1.80E-05 | 0        | 0        | 0        | 0        | 0        | 0        | 0        | 0        | 0        |
| 1.90E-05 | 0        | 0        | 0        | 5.00E-05 | 0        | 0        | 0        | 0        | 0        | 0        | 0        | 0        | 0        |
| 1.51E-04 | 0.001369 | 0        | 0        | 2.50E-05 | 0.002699 | 3.07E-04 | 0.004838 | 0.004151 | 0        | 0.002599 | 0.015144 | 0        | 0        |
| 2.61E-04 | 7.32E-04 | 6.20E-05 | 0        | 0.001958 | 3.60E-05 | 0        | 0        | 3.20E-05 | 1.40E-04 | 5.54E-04 | 0        | 1.34E-04 | 0        |
| 0.002784 | 7.00E-05 | 5.70E-05 | 0.00271  | 3.12E-04 | 0.001297 | 5.94E-04 | 0.001163 | 4.70E-05 | 0        | 0.001784 | 0.00319  | 3.38E-04 | 0        |
| 0.001277 | 0.001249 | 0        | 0        | 1.15E-04 | 5.78E-04 | 4.11E-04 | 8.62E-04 | 0        | 0        | 0.002171 | 0.001042 | 4.60E-05 | 0.003024 |
| 3.33E-04 | 2.63E-04 | 0        | 3.33E-04 | 0.0028   | 8.70E-05 | 1.25E-04 | 8.43E-04 | 2.89E-04 | 1.20E-05 | 0.006742 | 0        | 2.66E-04 | 2.24E-04 |
| 1.25E-04 | 0.005931 | 0.007837 | 4.60E-05 | 0        | 1.99E-04 | 9.33E-04 | 4.50E-05 | 0.011422 | 0        | 6.21E-04 | 0.002297 | 0.00175  | 0.001895 |

|          |          |          |          |          |          |          |          |          |          |          |          |          |          |
|----------|----------|----------|----------|----------|----------|----------|----------|----------|----------|----------|----------|----------|----------|
| 1.18E-04 | 6.20E-05 | 3.97E-04 | 6.70E-05 | 0.006878 | 2.88E-04 | 2.86E-04 | 0.007318 | 4.98E-04 | 0        | 0.005283 | 0.002056 | 0.001188 | 6.20E-05 |
| 1.30E-05 | 0        | 0        | 0        | 1.72E-04 | 0        | 0        | 0        | 0        | 2.30E-05 | 1.50E-04 | 0        | 0        | 0        |
| 2.69E-04 | 5.90E-05 | 5.10E-05 | 0        | 2.43E-04 | 5.30E-05 | 0        | 0        | 1.43E-04 | 0        | 0.00307  | 3.70E-05 | 1.80E-04 | 0        |
| 9.00E-06 | 0        | 0        | 0        | 5.24E-04 | 0        | 0        | 0        | 0        | 0        | 0        | 0        | 0        | 0        |
| 3.96E-04 | 0        | 1.24E-04 | 0        | 9.37E-04 | 0        | 0        | 0        | 0        | 1.19E-04 | 2.72E-04 | 0        | 0        | 0        |
| 0        | 1.11E-04 | 0        | 0        | 0        | 0        | 0        | 0        | 0        | 0        | 0        | 0        | 0        | 0        |
| 3.60E-05 | 0        | 0        | 0        | 1.19E-04 | 0        | 0        | 0        | 0        | 0        | 8.10E-05 | 0        | 0        | 0        |
| 9.80E-05 | 0.005788 | 0.00225  | 8.10E-05 | 0        | 3.10E-05 | 0.001279 | 2.20E-05 | 0.004779 | 2.82E-04 | 3.20E-05 | 0.001727 | 2.58E-04 | 7.89E-04 |
| 0        | 0        | 0        | 0        | 5.30E-05 | 0        | 0        | 0        | 0        | 0        | 8.90E-05 | 0        | 0        | 0        |
| 0        | 0        | 0        | 0        | 1.90E-05 | 0        | 0        | 0        | 0        | 0        | 0        | 0        | 0        | 0        |
| 0        | 0        | 0        | 0        | 0        | 0        | 0        | 0        | 0        | 0        | 0        | 0        | 0        | 0        |
| 0        | 0        | 0        | 0        | 8.10E-05 | 0        | 0        | 4.10E-05 | 0        | 0        | 0        | 0        | 0        | 4.81E-04 |
| 0        | 0        | 0        | 1.70E-05 | 3.11E-04 | 0        | 6.50E-05 | 0        | 3.10E-05 | 7.22E-04 | 1.51E-04 | 0        | 0        | 0        |
| 1.80E-05 | 0        | 0        | 0        | 2.30E-05 | 0        | 0        | 0        | 0        | 0        | 2.01E-04 | 0        | 0        | 0        |
| 1.63E-04 | 0        | 0        | 0        | 1.96E-04 | 0        | 0        | 0        | 0        | 0        | 9.80E-05 | 0        | 0        | 0        |
| 0        | 0        | 0        | 0        | 0        | 0        | 4.40E-05 | 3.70E-05 | 0        | 0        | 0        | 1.26E-04 | 0        | 0        |
| 0        | 0        | 0        | 0        | 0        | 0        | 0        | 0        | 0        | 0        | 0        | 0        | 0        | 0        |
| 0        | 0        | 0        | 0        | 0        | 0        | 0        | 0        | 0        | 0        | 0        | 0        | 0        | 0        |
| 2.00E-05 | 0        | 0        | 0        | 6.20E-05 | 2.80E-05 | 0        | 0        | 0        | 0        | 0        | 0        | 0        | 0        |
| 0        | 0        | 0        | 1.00E-05 | 6.30E-05 | 0        | 0        | 0        | 0        | 6.00E-05 | 2.10E-05 | 0        | 0        | 0        |
| 0        | 0        | 0        | 0        | 0        | 0        | 0        | 0        | 0        | 0        | 0        | 0        | 0        | 0        |
| 0.013613 | 0.00681  | 0.00622  | 0.002808 | 0.041067 | 0.01189  | 0.016236 | 0.010683 | 0.002184 | 0.004282 | 0.036553 | 0.010396 | 0.007217 | 0.009425 |

| CC29     | CC01     | CC09     | CC42     | CC33     | CC26     | CC46     | CC39     | CC31     | CC55     | CC08     | CC35     | CC64     | CC54     |
|----------|----------|----------|----------|----------|----------|----------|----------|----------|----------|----------|----------|----------|----------|
| 0.021805 | 0.009241 | 0.006702 | 0.005383 | 0.004746 | 0.004002 | 0.003966 | 0.003946 | 0.002735 | 0.002173 | 0.00174  | 0.0016   | 0.001595 | 0.001586 |
| 0.238261 | 0.236629 | 0.124763 | 0.02198  | 0.290797 | 0.009904 | 0.037424 | 0.027102 | 0.123239 | 0.023711 | 0.202327 | 0.876104 | 0.001923 | 0.178422 |
| 0.171381 | 0.003409 | 0.023542 | 0.111873 | 0.10655  | 0.673501 | 0.435454 | 0.585202 | 0.034425 | 0.040498 | 5.49E-04 | 0.005625 | 0.972593 | 0.03028  |
| 0.052025 | 0.184919 | 0.072217 | 0.397193 | 0.032255 | 0.081262 | 0.015399 | 0.023755 | 0.005722 | 0.289151 | 0.216593 | 0.008017 | 0.002358 | 0.162485 |
| 0.100637 | 0.525203 | 0.40795  | 0.007032 | 0.491161 | 0.054434 | 0.010792 | 0.052843 | 0.713589 | 2.08E-04 | 0.315524 | 0.001081 | 7.83E-04 | 0.175315 |
| 0.004365 | 8.76E-04 | 0.090906 | 3.33E-04 | 6.03E-04 | 0.003455 | 0.004938 | 0.008481 | 0.064431 | 5.05E-04 | 1.00E-04 | 4.45E-04 | 6.14E-04 | 0.001836 |
| 0.004544 | 0        | 8.25E-04 | 5.74E-04 | 7.44E-04 | 1.97E-04 | 0.001451 | 2.00E-04 | 6.07E-04 | 1.92E-04 | 0        | 9.99E-04 | 4.06E-04 | 0.002055 |
| 0.001515 | 7.35E-04 | 0.003447 | 0.384855 | 8.42E-04 | 1.73E-04 | 0.025073 | 7.38E-04 | 0.001849 | 0.091235 | 6.90E-05 | 8.90E-05 | 8.24E-04 | 7.45E-04 |
| 0.001014 | 8.74E-04 | 0.001747 | 0.0242   | 0.001577 | 0.018835 | 0.019492 | 0.013506 | 2.27E-04 | 1.39E-04 | 3.10E-05 | 6.31E-04 | 0.002075 | 1.87E-04 |
| 0.24982  | 0.012565 | 0.013552 | 1.36E-04 | 0.018416 | 0.00632  | 0.004357 | 0.006123 | 0.008155 | 0.248872 | 0.241367 | 0.091367 | 0.001075 | 0.256261 |
| 0.015031 | 0.002609 | 1.36E-04 | 0.021341 | 0.009023 | 0.001748 | 0.010233 | 0.024542 | 0.007338 | 0.171438 | 4.94E-04 | 0.001064 | 2.72E-04 | 0.008112 |
| 0.001003 | 1.42E-04 | 0.029724 | 7.00E-05 | 1.39E-04 | 1.15E-04 | 0.028639 | 0.005801 | 5.80E-05 | 4.00E-05 | 0        | 3.36E-04 | 1.19E-04 | 0.002197 |
| 0.034695 | 0        | 0.005601 | 1.39E-04 | 0.005968 | 0.0555   | 0.063504 | 0.2105   | 0.001778 | 0        | 1.48E-04 | 1.77E-04 | 0.004867 | 0.004571 |
| 8.94E-04 | 1.60E-04 | 0.014437 | 6.10E-05 | 7.68E-04 | 2.45E-04 | 0.043127 | 0.001691 | 7.24E-04 | 0        | 4.71E-04 | 3.47E-04 | 1.20E-04 | 0.007856 |
| 0.014924 | 0.002649 | 0.125127 | 9.16E-04 | 0.004111 | 0.002577 | 0.001256 | 0.003718 | 0.002947 | 4.50E-05 | 0.01098  | 8.90E-05 | 2.38E-04 | 0.029551 |
| 0.001411 | 0.001638 | 0.001898 | 0.001364 | 0.003121 | 0.001003 | 0.014852 | 0.005475 | 0.001016 | 0.011411 | 1.44E-04 | 5.66E-04 | 5.50E-05 | 0.009626 |
| 0.004798 | 8.80E-04 | 0.005165 | 8.19E-04 | 5.55E-04 | 0.008881 | 0.009177 | 1.80E-05 | 7.84E-04 | 0.079194 | 6.16E-04 | 0        | 2.65E-04 | 8.26E-04 |
| 2.10E-05 | 0        | 3.30E-05 | 0        | 0        | 0        | 1.09E-04 | 0.00105  | 0        | 0        | 0        | 0        | 2.10E-05 | 0        |
| 0        | 0        | 2.70E-05 | 0        | 1.24E-04 | 7.70E-05 | 0        | 0        | 5.90E-05 | 0        | 0        | 0        | 3.20E-05 | 0        |
| 8.20E-05 | 7.45E-04 | 1.21E-04 | 2.25E-04 | 2.04E-04 | 3.00E-05 | 0.155432 | 0        | 0        | 0.013539 | 0        | 8.90E-05 | 5.20E-05 | 1.04E-04 |
| 5.90E-05 | 0        | 0        | 0        | 0        | 0        | 5.02E-04 | 5.40E-05 | 0        | 0        | 0        | 9.60E-05 | 0        | 0        |
| 0.006131 | 0.001645 | 0.007607 | 0        | 3.32E-04 | 0.001127 | 0.004939 | 0.002458 | 0.001397 | 1.70E-05 | 2.12E-04 | 8.50E-05 | 8.40E-05 | 0.012698 |
| 0        | 0        | 0        | 0        | 0        | 0        | 1.07E-04 | 0        | 0        | 0        | 2.70E-05 | 0        | 0        | 0        |
| 2.74E-04 | 0.003857 | 0        | 2.54E-04 | 4.97E-04 | 1.77E-04 | 0.001406 | 0        | 3.20E-04 | 0.003682 | 0.002686 | 0.003521 | 1.10E-05 | 0.009561 |
| 8.45E-04 | 0.001647 | 0.024953 | 0        | 8.19E-04 | 0.002041 | 7.12E-04 | 6.59E-04 | 9.26E-04 | 0        | 0.003028 | 0        | 1.14E-04 | 0.012211 |
| 0.027752 | 0.004926 | 5.93E-04 | 0.004563 | 0.010919 | 1.16E-04 | 0.00998  | 0.001923 | 0.005227 | 0.001011 | 2.74E-04 | 7.14E-04 | 6.20E-05 | 0.012241 |
| 0.002291 | 1.51E-04 | 0.006689 | 0.001354 | 0        | 3.30E-05 | 0.00789  | 0.001547 | 0.001378 | 4.90E-05 | 2.70E-05 | 0        | 2.90E-05 | 7.15E-04 |
| 0        | 0        | 0        | 0        | 0        | 0        | 0        | 0        | 0        | 0        | 0        | 0        | 0        | 0        |
| 0.003622 | 0        | 0.003152 | 0.002605 | 2.01E-04 | 5.84E-04 | 0.001235 | 7.73E-04 | 6.59E-04 | 4.48E-04 | 8.77E-04 | 9.30E-05 | 1.78E-04 | 0.002016 |
| 0.008833 | 0        | 0        | 0        | 0.002552 | 1.03E-04 | 8.28E-04 | 3.33E-04 | 0.002335 | 2.40E-05 | 3.70E-05 | 0        | 2.11E-04 | 0.048268 |
| 1.70E-05 | 0        | 0        | 0        | 7.10E-05 | 1.43E-04 | 0        | 6.70E-05 | 0        | 0        | 0        | 0        | 4.30E-05 | 0        |
| 7.00E-05 | 0        | 0        | 0        | 0        | 0        | 1.01E-04 | 5.90E-05 | 0        | 0        | 0        | 0        | 0        | 0        |
| 0.002057 | 0        | 0.001567 | 0        | 0.001932 | 0        | 0        | 0        | 6.42E-04 | 0        | 0        | 0        | 0        | 0.018166 |
| 4.10E-05 | 0        | 0        | 6.11E-04 | 1.39E-04 | 4.20E-05 | 0        | 2.15E-04 | 0        | 0.007976 | 0        | 0        | 4.00E-05 | 4.60E-05 |
| 0.002451 | 1.53E-04 | 0.002982 | 5.71E-04 | 2.02E-04 | 4.35E-04 | 0        | 1.74E-04 | 2.71E-04 | 0.00739  | 2.40E-05 | 0        | 2.60E-05 | 9.60E-05 |
| 0        | 0        | 0        | 0        | 0        | 0        | 0        | 0        | 0        | 0        | 0        | 0        | 0        | 0        |
| 0.001448 | 7.46E-04 | 2.90E-05 | 0        | 2.51E-04 | 0        | 3.05E-04 | 3.80E-04 | 0.009106 | 0        | 0        | 0        | 7.90E-05 | 5.40E-05 |
| 0.011072 | 0.001076 | 0.006943 | 0        | 4.57E-04 | 5.06E-04 | 3.23E-04 | 2.30E-05 | 0.001686 | 0        | 1.22E-04 | 0.00107  | 1.63E-04 | 6.09E-04 |
| 0.001872 | 7.49E-04 | 0.001967 | 1.58E-04 | 4.44E-04 | 8.20E-05 | 0.00115  | 6.70E-05 | 0.001774 | 3.00E-05 | 0.001273 | 0.005286 | 2.50E-05 | 0.002336 |
| 1.88E-04 | 0        | 5.18E-04 | 0        | 6.40E-05 | 7.64E-04 | 0.014076 | 0.001736 | 2.50E-04 | 0        | 0        | 0        | 2.50E-05 | 5.00E-05 |
| 1.80E-05 | 0        | 0        | 0        | 0        | 3.28E-04 | 4.23E-04 | 4.03E-04 | 1.28E-04 | 0        | 0        | 0        | 0        | 0        |
| 8.50E-05 | 0        | 0        | 1.95E-04 | 6.40E-05 | 7.30E-05 | 0.031284 | 3.38E-04 | 5.50E-05 | 1.84E-04 | 0        | 0        | 0        | 0        |
| 0        | 0        | 0        | 0        | 6.20E-05 | 4.90E-05 | 0.00101  | 4.53E-04 | 0        | 0        | 0        | 0        | 0        | 0        |
| 2.62E-04 | 0        | 0        | 0        | 6.30E-05 | 0        | 7.35E-04 | 0        | 0        | 0.00118  | 0        | 0        | 2.10E-04 | 0        |
| 6.50E-05 | 0        | 2.90E-05 | 0        | 0        | 0        | 1.00E-04 | 1.21E-04 | 0        | 1.03E-04 | 2.60E-05 | 0        | 0        | 0        |
| 5.30E-05 | 0        | 0        | 0        | 0        | 0        | 8.23E-04 | 1.13E-04 | 0        | 2.90E-05 | 0        | 0        | 3.00E-05 | 4.50E-05 |
| 0        | 0        | 0.004516 | 8.30E-05 | 0        | 0        | 0        | 2.45E-04 | 0        | 0        | 0        | 0        | 0        | 4.50E-05 |
| 0        | 0        | 0        | 0        | 0        | 0        | 0        | 0        | 0        | 0        | 0        | 0        | 0        | 0        |
| 0        | 0        | 0        | 0        | 0        | 3.80E-04 | 0        | 0        | 3.18E-04 | 2.20E-05 | 0        | 0        | 0.004913 | 0        |
| 0.002869 | 0        | 3.50E-05 | 0        | 0        | 0.044582 | 0        | 6.61E-04 | 0        | 2.00E-05 | 0        | 0        | 0        | 1.02E-04 |
| 7.20E-05 | 1.49E-04 | 3.47E-04 | 0        | 6.00E-05 | 3.30E-05 | 0.00124  | 3.30E-04 | 0        | 0        | 0        | 0        | 8.00E-06 | 0        |
| 0        | 0        | 0        | 0        | 0        | 3.90E-05 | 0        | 5.60E-05 | 2.83E-04 | 0        | 0        | 0        | 5.30E-05 | 1.09E-04 |
| 7.00E-05 | 1.32E-04 | 2.80E-05 | 0        | 1.90E-04 | 0        | 0.01106  | 8.24E-04 | 3.66E-04 | 0        | 0        | 0        | 0        | 3.93E-04 |
| 0.002052 | 6.07E-04 | 2.93E-04 | 0.009811 | 0.004402 | 0.020939 | 0        | 0        | 7.06E-04 | 0.002342 | 3.10E-05 | 7.50E-05 | 0.002584 | 0.002869 |

|          |          |          |          |          |          |          |          |          |          |          |          |          |          |
|----------|----------|----------|----------|----------|----------|----------|----------|----------|----------|----------|----------|----------|----------|
| 9.00E-05 | 0        | 0        | 0        | 1.24E-04 | 0        | 0.004369 | 0.001016 | 1.76E-04 | 5.40E-05 | 0        | 0        | 1.81E-04 | 2.10E-04 |
| 0        | 0        | 0        | 0        | 0        | 0        | 4.87E-04 | 0        | 0        | 2.30E-05 | 0        | 0        | 0        | 0        |
| 0        | 0        | 0        | 0        | 0        | 0        | 4.40E-05 | 6.08E-04 | 1.30E-04 | 0        | 3.10E-05 | 0        | 9.20E-05 | 9.00E-06 |
| 0        | 0        | 0        | 0        | 0        | 0        | 0        | 0        | 0        | 0        | 0        | 0        | 0        | 0        |
| 6.40E-05 | 0        | 0        | 0        | 0        | 0        | 1.14E-04 | 0        | 0        | 0        | 0        | 0        | 0        | 0        |
| 0        | 0        | 0        | 0        | 0        | 0        | 0        | 0        | 0        | 0        | 0        | 0        | 0        | 0        |
| 2.20E-05 | 0        | 0        | 0        | 0        | 0        | 0        | 0        | 0        | 0        | 0        | 0        | 0        | 0        |
| 2.72E-04 | 1.55E-04 | 0        | 1.20E-04 | 5.52E-04 | 0.001367 | 0        | 0        | 1.82E-04 | 0        | 0        | 0        | 3.09E-04 | 0        |
| 0        | 0        | 0        | 0        | 0        | 0        | 0        | 2.20E-05 | 0        | 0        | 0        | 0        | 0        | 1.63E-04 |
| 0        | 0        | 0        | 0        | 0        | 0        | 0        | 0        | 0        | 0        | 0        | 0        | 0        | 0        |
| 0        | 0        | 0        | 0        | 0        | 0        | 0        | 0        | 0        | 0        | 0        | 0        | 0        | 0        |
| 0        | 0        | 0        | 0        | 0        | 0        | 0        | 0        | 0        | 0        | 0        | 0        | 0        | 0        |
| 4.80E-05 | 0        | 0        | 6.32E-04 | 0        | 1.23E-04 | 0        | 2.10E-05 | 0        | 0        | 6.70E-05 | 0        | 4.10E-05 | 0        |
| 0        | 0        | 0        | 0        | 0        | 0        | 0        | 0        | 0        | 0        | 0        | 0        | 0        | 0        |
| 6.70E-05 | 0        | 0        | 0        | 0        | 0        | 1.00E-04 | 0        | 0        | 0        | 0        | 0        | 0        | 0        |
| 0        | 0        | 0        | 0        | 0        | 0        | 0        | 0        | 0        | 0        | 0        | 0        | 0        | 0        |
| 0        | 0        | 0        | 0        | 0        | 0        | 0        | 0        | 0        | 0        | 0        | 0        | 0        | 0        |
| 0        | 0        | 0        | 0        | 0        | 0        | 0        | 0        | 0        | 0        | 0        | 0        | 0        | 0        |
| 3.70E-05 | 0        | 0        | 0        | 0        | 0        | 0        | 0        | 0        | 5.00E-05 | 0        | 0        | 0        | 0        |
| 1.70E-05 | 0        | 0        | 0        | 0        | 0        | 1.06E-04 | 0        | 0        | 0        | 0        | 0        | 0        | 0        |
| 0        | 0        | 0        | 0        | 0        | 0        | 0        | 0        | 0        | 0        | 0        | 0        | 0        | 0        |
| 0.006588 | 7.33E-04 | 0.009832 | 5.49E-04 | 0.003519 | 0.004011 | 0.019312 | 0.010108 | 0.002132 | 0.002984 | 1.36E-04 | 3.42E-04 | 2.85E-04 | 0.004982 |

| CC17     | CC20     | CC48     | CC02     | CC05     | CC06     |
|----------|----------|----------|----------|----------|----------|
| 0.001421 | 9.82E-04 | 7.42E-04 | 5.11E-04 | 1.21E-04 | 1.11E-04 |
| 0.240161 | 0.069864 | 0.149546 | 0.268974 | 0.597858 | 0.333565 |
| 0.019035 | 0.040896 | 0.005209 | 0.031166 | 0.021588 | 0.08799  |
| 0.1539   | 0.004336 | 0.309515 | 0.180312 | 0.171448 | 0.289009 |
| 0.232437 | 0.065683 | 3.09E-04 | 0.055463 | 0.026697 | 0.077827 |
| 0.005599 | 0.003598 | 1.30E-04 | 0.030431 | 1.82E-04 | 1.90E-05 |
| 7.96E-04 | 6.03E-04 | 6.50E-05 | 0.015444 | 0.005774 | 0.002611 |
| 7.24E-04 | 0.001236 | 0.30678  | 7.50E-05 | 0.003117 | 3.00E-05 |
| 0.002857 | 1.21E-04 | 2.02E-04 | 7.50E-05 | 7.69E-04 | 1.60E-05 |
| 0.035588 | 0.60363  | 0.020239 | 0.018512 | 0.001063 | 0.003104 |
| 6.15E-04 | 0.037248 | 0.012633 | 0.187626 | 0.002132 | 0.020399 |
| 3.77E-04 | 0.002475 | 8.70E-05 | 0.001227 | 0.009256 | 7.20E-04 |
| 0.003039 | 2.30E-05 | 4.30E-05 | 2.40E-05 | 3.99E-04 | 0.002712 |
| 0.003575 | 0.018921 | 0        | 0        | 0.073581 | 0.044648 |
| 0.011601 | 0.002558 | 1.32E-04 | 0.072212 | 0.028098 | 0.01572  |
| 0.014193 | 5.96E-04 | 0.080258 | 0.001183 | 0.003743 | 5.08E-04 |
| 6.99E-04 | 0.003224 | 1.12E-04 | 0.051445 | 2.71E-04 | 0.027254 |
| 0        | 0        | 1.90E-05 | 0        | 0        | 0        |
| 0        | 0        | 2.50E-05 | 0        | 0.006781 | 1.00E-05 |
| 0.003866 | 1.80E-05 | 0        | 3.80E-04 | 0        | 0        |
| 0.034319 | 1.55E-04 | 1.21E-04 | 1.27E-04 | 0        | 1.80E-05 |
| 0.01207  | 0.002176 | 2.30E-05 | 0.031987 | 2.08E-04 | 0.030473 |
| 0        | 3.15E-04 | 1.43E-04 | 0        | 0        | 2.30E-05 |
| 0.021633 | 0.001739 | 0.001928 | 0.008913 | 0.006791 | 0.006812 |
| 0.005026 | 0.008902 | 2.00E-05 | 1.20E-04 | 3.24E-04 | 0.037143 |
| 0.025664 | 4.64E-04 | 0.001873 | 0.002892 | 0        | 3.54E-04 |
| 0.006854 | 0.050899 | 4.70E-05 | 0.007481 | 0.003254 | 0.002055 |
| 0        | 0        | 0        | 0        | 0        | 0        |
| 0.005313 | 0.015693 | 0        | 0.003217 | 0.001132 | 0.001461 |
| 0.013009 | 2.00E-05 | 5.90E-05 | 9.20E-05 | 0        | 4.50E-04 |
| 0        | 0        | 0        | 0        | 0        | 0        |
| 0.014121 | 2.42E-04 | 3.70E-05 | 1.24E-04 | 0        | 0        |
| 0.003937 | 1.90E-05 | 0        | 2.00E-05 | 0        | 0        |
| 2.80E-05 | 0.003102 | 0        | 0        | 0        | 0        |
| 0.01011  | 0.0198   | 0.029702 | 0.004329 | 5.90E-05 | 0        |
| 2.43E-04 | 0        | 0        | 2.00E-05 | 0        | 0        |
| 2.20E-05 | 0.004909 | 6.50E-05 | 0.001162 | 0.009603 | 0        |
| 0.005307 | 0.010149 | 2.60E-05 | 0.005678 | 0.013295 | 9.50E-05 |
| 0.011484 | 0.009727 | 2.50E-05 | 0.010496 | 1.25E-04 | 9.71E-04 |
| 0.002631 | 1.49E-04 | 0        | 0        | 0        | 3.70E-05 |
| 0.003793 | 7.70E-05 | 0        | 0        | 0        | 3.70E-05 |
| 1.39E-04 | 0        | 0.008599 | 0        | 0        | 1.47E-04 |
| 4.04E-04 | 7.10E-05 | 2.40E-05 | 0        | 0        | 9.60E-05 |
| 0        | 4.10E-05 | 2.20E-05 | 5.85E-04 | 0        | 0        |
| 1.08E-04 | 1.58E-04 | 1.86E-04 | 2.10E-05 | 0        | 2.30E-05 |
| 1.80E-05 | 8.14E-04 | 0        | 9.00E-05 | 0        | 0        |
| 6.70E-05 | 1.72E-04 | 0        | 0        | 0        | 4.00E-05 |
| 0.002065 | 7.40E-05 | 0        | 0        | 0        | 0        |
| 9.87E-04 | 1.70E-05 | 0        | 0        | 0        | 0        |
| 0        | 0        | 0        | 0        | 0        | 0        |
| 4.10E-05 | 4.30E-05 | 7.60E-05 | 0        | 0        | 1.40E-05 |
| 2.00E-05 | 0        | 0        | 5.15E-04 | 2.90E-05 | 1.90E-05 |
| 0        | 1.70E-04 | 0        | 0        | 0        | 0        |
| 0.004219 | 3.50E-05 | 0        | 2.30E-05 | 0        | 4.87E-04 |
| 6.10E-05 | 6.20E-05 | 0        | 2.11E-04 | 3.07E-04 | 8.45E-04 |

|          |          |          |          |          |          |
|----------|----------|----------|----------|----------|----------|
| 3.72E-04 | 4.35E-04 | 5.90E-05 | 0        | 0        | 0        |
| 1.40E-05 | 0        | 1.03E-04 | 0        | 0        | 0        |
| 1.90E-05 | 0        | 0.063661 | 0        | 0        | 0        |
| 2.50E-05 | 1.70E-05 | 0        | 0        | 0        | 0        |
| 0.008508 | 1.53E-04 | 0        | 0        | 0        | 0        |
| 0        | 0        | 0        | 0        | 0        | 0        |
| 0.001671 | 0        | 0        | 3.50E-05 | 0        | 0        |
| 0        | 0        | 0        | 0        | 0        | 0        |
| 0        | 0        | 0        | 0        | 0        | 0        |
| 2.41E-04 | 0        | 0        | 0        | 0        | 0        |
| 1.90E-05 | 0        | 0        | 0        | 0        | 0        |
| 7.61E-04 | 0        | 0        | 0        | 0        | 0        |
| 9.68E-04 | 0        | 0        | 0        | 0        | 1.80E-05 |
| 0.001098 | 5.30E-05 | 0        | 1.60E-05 | 0        | 0        |
| 0.003853 | 2.10E-05 | 0        | 9.90E-05 | 0        | 0        |
| 0        | 0        | 0        | 0        | 0        | 0        |
| 2.30E-05 | 0        | 0        | 0        | 0        | 0        |
| 0        | 0        | 0        | 0        | 0        | 0        |
| 4.50E-05 | 1.63E-04 | 1.90E-05 | 2.50E-05 | 0        | 0        |
| 0        | 0        | 0        | 0        | 0        | 0        |
| 0        | 0        | 2.10E-05 | 0        | 0        | 0        |
| 0.068207 | 0.012952 | 0.007115 | 0.006662 | 0.011995 | 0.012129 |

**Table S4. The different degree of phylum level (p value) between the healthy controls (n=94) and confirmed cases (n=48)**

| ID                    | H.median                | H.mean      | H.se       | CC.median               | CC.mean    | CC.se      | p-value   | z-score    | Sig_m<br>ark | q-value  | fixp    | fixps      |
|-----------------------|-------------------------|-------------|------------|-------------------------|------------|------------|-----------|------------|--------------|----------|---------|------------|
| Firmicutes            | 0.2202(0.1702,0.2695)   | 0.225054457 | 0.0079561  | 0.3618(0.1836,0.5026)   | 0.37226383 | 0.03266346 | 1.33E-04  | -3.8209578 | ***          | 2.99E-04 | 0.0001  | ***0.0001  |
| Bacteroidota          | 0.3198(0.2633,0.3926)   | 0.323659096 | 0.00926198 | 0.115(0.0596,0.2405)    | 0.17182904 | 0.0247922  | 5.53E-12  | -6.8912522 | ***          | 9.95E-11 | <0.0001 | ***<0.0001 |
| Proteobacteria        | 0.2517(0.142,0.3485)    | 0.25831167  | 0.01546552 | 0.0925(0.0238,0.2772)   | 0.18377202 | 0.03101321 | 4.33E-04  | -3.5191707 | ***          | 8.66E-04 | 0.0004  | ***0.0004  |
| Patescibacteria       | 0.0235(0.0128,0.0348)   | 0.025461904 | 0.00177392 | 0.0037(0.0005,0.0101)   | 0.01090604 | 0.00279398 | 5.37E-10  | -6.2079782 | ***          | 4.83E-09 | <0.0001 | ***<0.0001 |
| Campilobacterota      | 0.0079(0.005,0.0127)    | 0.010297479 | 8.13E-04   | 0.0013(0.0006,0.0053)   | 0.00625492 | 0.00196262 | 1.38E-08  | -5.6753789 | ***          | 6.23E-08 | <0.0001 | ***<0.0001 |
| Spirochaetota         | 0.0014(0.0005,0.0035)   | 0.002684872 | 4.76E-04   | <0.0001(<0.0001,0.0006) | 0.00106717 | 4.10E-04   | 1.18E-08  | -5.7031871 | ***          | 6.23E-08 | <0.0001 | ***<0.0001 |
| Synergistota          | 0.0001(<0.0001,0.0004)  | 4.32E-04    | 9.18E-05   | <0.0001(<0.0001,0.0001) | 1.67E-04   | 8.55E-05   | 3.13E-07  | -5.115618  | ***          | 1.13E-06 | <0.0001 | ***<0.0001 |
| Desulfobacterota      | <0.0001(<0.0001,0.0002) | 4.48E-04    | 1.21E-04   | <0.0001(<0.0001,0.0001) | 2.25E-05   | 1.01E-05   | 8.45E-07  | -4.9245726 | ***          | 2.17E-06 | <0.0001 | ***<0.0001 |
| Deferribacterota      | <0.0001(<0.0001,0.0001) | 4.09E-04    | 2.95E-04   | <0.0001(<0.0001,0.0001) | 0          | 0          | 0.0387582 | -2.0667449 | *            | 0.063423 | 0.0388  | * 0.0388   |
| Verrucomicrobiota     | <0.0001(<0.0001,0.0001) | 7.44E-05    | 2.52E-05   | <0.0001(<0.0001,0.0001) | 8.54E-06   | 5.30E-06   | 0.0013954 | -3.1955986 | **           | 0.002512 | 0.0014  | ** 0.0014  |
| Bacteria_unclassified | <0.0001(<0.0001,0.0001) | 8.40E-07    | 4.80E-07   | <0.0001(<0.0001,0.0001) | 5.23E-05   | 2.09E-05   | 5.84E-07  | -4.9963045 | ***          | 1.75E-06 | <0.0001 | ***<0.0001 |

**Table S4. The different degree of genus level (p value) between the healthy controls (n=94) and confirmed cases (n=48)**

| ID                           | H.median                 | H.mean      | H.se        | CC.median                | CC.mean     | CC.se    | p-value  | z-score      | Sig_ mark | q-value  | fixp    | fixps      |
|------------------------------|--------------------------|-------------|-------------|--------------------------|-------------|----------|----------|--------------|-----------|----------|---------|------------|
| Neisseria                    | 0.1421(0.0644,0.2686)    | 0.169761053 | 0.013085052 | 0.0346(0.0036,0.1682)    | 0.138294521 | 0.029863 | 3.12E-04 | -3.604871806 | ***       | 8.36E-04 | 0.0003  | ***0.0003  |
| Prevotella                   | 0.165(0.1041,0.2111)     | 0.168590851 | 0.009107967 | 0.0549(0.0234,0.1844)    | 0.124493771 | 0.024038 | 3.80E-05 | -4.119212797 | ***       | 1.32E-04 | <0.0001 | ***<0.0001 |
| Streptococcus                | 0.0522(0.0339,0.0851)    | 0.065783394 | 0.004755614 | 0.0973(0.0297,0.3142)    | 0.195030833 | 0.033191 | 0.048742 | -1.970845492 | *         | 0.07469  | 0.0487  | * 0.0487   |
| Leptotrichia                 | 0.0257(0.0158,0.0496)    | 0.039801809 | 0.004334475 | 0.056(0.0327,0.1554)     | 0.122804625 | 0.021829 | 5.75E-05 | -4.022986324 | ***       | 1.82E-04 | <0.0001 | ***<0.0001 |
| Fusobacterium                | 0.059(0.0374,0.0934)     | 0.06736984  | 0.004523445 | 0.0076(0.0016,0.0407)    | 0.039066146 | 0.012837 | 1.88E-09 | -6.007999788 | ***       | 2.06E-08 | <0.0001 | ***<0.0001 |
| Alloprevotella               | 0.0611(0.0369,0.0978)    | 0.068396457 | 0.004422687 | 0.0008(0.0005,0.0017)    | 0.002005479 | 4.39E-04 | 6.36E-22 | -9.623582422 | ***       | 1.96E-19 | <0.0001 | ***<0.0001 |
| Porphyromonas                | 0.0458(0.0206,0.0725)    | 0.050024957 | 0.003820588 | 0.0034(0.0009,0.0207)    | 0.02960225  | 0.010328 | 1.94E-09 | -6.003004069 | ***       | 2.06E-08 | <0.0001 | ***<0.0001 |
| Haemophilus                  | 0.0409(0.0224,0.0682)    | 0.051747766 | 0.004688509 | 0.0032(0.0007,0.019)     | 0.017106125 | 0.004506 | 2.32E-12 | -7.01349812  | ***       | 6.51E-11 | <0.0001 | ***<0.0001 |
| Capnocytophaga               | 0.011(0.0044,0.0192)     | 0.017410543 | 0.002076938 | 0.0034(0.0006,0.0133)    | 0.011414083 | 0.00259  | 7.49E-04 | -3.370806467 | ***       | 0.00186  | 0.0007  | ***0.0007  |
| TM7x                         | 0.0078(0.0037,0.0145)    | 0.010800394 | 0.001098544 | 0.0017(0.0004,0.0063)    | 0.00788875  | 0.00229  | 4.24E-06 | -4.599424234 | ***       | 1.95E-05 | <0.0001 | ***<0.0001 |
| Campylobacter                | 0.0078(0.0049,0.0122)    | 0.009667415 | 6.90E-04    | 0.0013(0.0006,0.0053)    | 0.006253188 | 0.001963 | 2.55E-08 | -5.569726047 | ***       | 2.07E-07 | <0.0001 | ***<0.0001 |
| Granulicatella               | 0.0057(0.0038,0.0087)    | 0.007321681 | 5.87E-04    | 0.0037(0.0008,0.0094)    | 0.008644729 | 0.002049 | 0.034036 | -2.11964854  | *         | 0.05606  | 0.034   | * 0.034    |
| Actinobacillus               | 0.0015(0.0002,0.0048)    | 0.010110149 | 0.003220446 | <0.0001(<0.0001,<0.0001) | 0.001499146 | 9.66E-04 | 1.50E-11 | -6.748168495 | ***       | 3.29E-10 | <0.0001 | ***<0.0001 |
| g_Absconditabacteriales_     | 0.0064(0.0012,0.0109)    | 0.008242298 | 9.96E-04    | <0.0001(<0.0001,<0.0002) | 6.22E-04    | 2.26E-04 | 8.80E-15 | -7.755526394 | ***       | 3.87E-13 | <0.0001 | ***<0.0001 |
| Bacteroides                  | 0.0005(0.0001,0.0023)    | 0.007102128 | 0.002468277 | <0.0001(<0.0001,<0.0001) | 9.59E-04    | 7.17E-04 | 7.49E-11 | -6.510577394 | ***       | 1.28E-09 | <0.0001 | ***<0.0001 |
| Oribacterium                 | 0.0041(0.0028,0.0061)    | 0.004629426 | 2.79E-04    | 0.0019(0.0009,0.005)     | 0.004610875 | 0.00105  | 5.51E-04 | -3.454419889 | ***       | 0.00139  | 0.0006  | ***0.0006  |
| Pseudomonas                  | 0.0016(0.0005,0.0053)    | 0.005926404 | 0.001207174 | <0.0001(<0.0001,<0.0001) | 7.91E-05    | 5.15E-05 | 1.05E-19 | -9.083472302 | ***       | 1.62E-17 | <0.0001 | ***<0.0001 |
| Megasphaera                  | 0.0015(0.0004,0.0055)    | 0.004677713 | 8.02E-04    | 0.0004(<0.0001,0.002)    | 0.002022875 | 5.58E-04 | 0.002021 | -3.087145668 | **        | 0.00448  | 0.002   | ** 0.002   |
| Stomatobaculum               | 0.0022(0.001,0.005)      | 0.003876809 | 5.56E-04    | 0.0009(0.0003,0.0027)    | 0.003548313 | 0.001007 | 0.003528 | -2.917576433 | **        | 0.00734  | 0.0035  | ** 0.0035  |
| Moraxella                    | <0.0001(<0.0001,<0.0001) | 0.005172415 | 0.00268073  | <0.0001(<0.0001,<0.0001) | 2.25E-06    | 1.58E-06 | 4.41E-05 | -4.084999519 | ***       | 1.49E-04 | <0.0001 | ***<0.0001 |
| Solobacterium                | 0.003(0.0022,0.0045)     | 0.003863372 | 3.29E-04    | 0.0012(0.0003,0.003)     | 0.002449563 | 6.49E-04 | 1.09E-06 | -4.875407272 | ***       | 5.95E-06 | <0.0001 | ***<0.0001 |
| Clostridia_UCG-014           | 0.0029(0.0015,0.005)     | 0.003760894 | 3.16E-04    | 0.0005(<0.0001,0.0024)   | 0.002628688 | 0.001051 | 1.04E-07 | -5.320052225 | ***       | 7.43E-07 | <0.0001 | ***<0.0001 |
| Aggregatibacter              | 0.0029(0.0008,0.0069)    | 0.004317691 | 4.45E-04    | <0.0001(<0.0001,<0.0001) | 5.93E-04    | 2.00E-04 | 5.77E-15 | -7.808917594 | ***       | 2.96E-13 | <0.0001 | ***<0.0001 |
| Faecalibacterium             | 0.0002(<0.0001,0.001)    | 0.004224266 | 0.001479948 | <0.0001(<0.0001,<0.0001) | 3.75E-04    | 2.94E-04 | 1.83E-09 | -6.01180427  | ***       | 2.06E-08 | <0.0001 | ***<0.0001 |
| Lachnospiraceae_uncultured   | 0.0012(0.0002,0.0042)    | 0.003575043 | 7.10E-04    | <0.0001(<0.0001,<0.001)  | 0.001310417 | 4.82E-04 | 4.10E-06 | -4.60637879  | ***       | 1.91E-05 | <0.0001 | ***<0.0001 |
| Corynebacterium              | 0.0007(0.0004,0.0016)    | 0.002868426 | 8.31E-04    | 0.0001(<0.0001,0.0006)   | 0.002483542 | 0.001388 | 3.64E-06 | -4.630727875 | ***       | 1.75E-05 | <0.0001 | ***<0.0001 |
| Halomonas                    | <0.0001(<0.0001,0.0002)  | 2.55E-04    | 6.06E-05    | 0.0003(<0.0001,0.004)    | 0.007580667 | 0.002317 | 5.73E-05 | -4.023690104 | ***       | 1.82E-04 | <0.0001 | ***<0.0001 |
| Muribaculaceae               | <0.0001(<0.0001,0.0003)  | 0.004072617 | 0.001402026 | <0.0001(<0.0001,<0.0001) | 7.96E-06    | 5.29E-06 | 7.35E-10 | -6.158422985 | ***       | 1.03E-08 | <0.0001 | ***<0.0001 |
| Tannerella                   | 0.0017(0.0008,0.0033)    | 0.002695223 | 3.93E-04    | 0.0004(<0.0001,0.002)    | 0.002003083 | 5.73E-04 | 6.15E-05 | -4.007100503 | ***       | 1.93E-04 | <0.0001 | ***<0.0001 |
| [Eubacterium]_nodatum_group  | 0.002(0.0013,0.003)      | 0.002333032 | 1.62E-04    | 0.0012(0.0003,0.0026)    | 0.002485188 | 5.10E-04 | 0.007743 | -2.663082232 | **        | 0.01532  | 0.0077  | ** 0.0077  |
| Atopobium                    | 0.0014(0.0008,0.003)     | 0.002436968 | 3.01E-04    | 0.0007(0.0002,0.0016)    | 0.001662667 | 3.82E-04 | 0.00156  | -3.163323719 | **        | 0.00348  | 0.0016  | ** 0.0016  |
| Treponema                    | 0.0013(0.0005,0.0035)    | 0.002680266 | 4.76E-04    | <0.0001(<0.0001,<0.0006) | 0.001050563 | 4.11E-04 | 5.64E-09 | -5.827009789 | ***       | 5.27E-08 | <0.0001 | ***<0.0001 |
| Lachnospiraceae_unclassified | 0.0001(<0.0001,0.0005)   | 0.002976691 | 8.79E-04    | <0.0001(<0.0001,<0.0001) | 1.79E-04    | 8.79E-05 | 5.47E-07 | -5.009157126 | ***       | 3.24E-06 | <0.0001 | ***<0.0001 |
| Saccharimonadales            | 0.0012(0.0002,0.0032)    | 0.00254934  | 4.17E-04    | <0.0001(<0.0001,0.0003)  | 4.20E-04    | 1.31E-04 | 9.09E-10 | -6.12458647  | ***       | 1.22E-08 | <0.0001 | ***<0.0001 |
| Rhodococcus                  | <0.0001(<0.0001,0.0006)  | 0.00209517  | 8.74E-04    | <0.0001(<0.0001,<0.0001) | 5.00E-05    | 1.52E-05 | 1.52E-05 | -4.325846671 | ***       | 5.92E-05 | <0.0001 | ***<0.0001 |
| Parvimonas                   | 0.0012(0.0005,0.0024)    | 0.001871883 | 2.18E-04    | <0.0001(<0.0001,0.0001)  | 4.03E-04    | 1.40E-04 | 6.97E-11 | -6.521288901 | ***       | 1.26E-09 | <0.0001 | ***<0.0001 |
| Johnsonella                  | 0.0006(<0.0001,0.0017)   | 0.001378255 | 2.05E-04    | 0.0002(<0.0001,0.0007)   | 0.001296729 | 5.15E-04 | 0.003029 | -2.964739446 | **        | 0.00643  | 0.003   | ** 0.003   |
| Fusicatenibacter             | <0.0001(<0.0001,0.0005)  | 0.001944043 | 6.81E-04    | <0.0001(<0.0001,<0.0001) | 5.13E-05    | 4.31E-05 | 2.21E-10 | -6.345705599 | ***       | 3.41E-09 | <0.0001 | ***<0.0001 |



|                                 |                        |             |          |                          |             |          |          |              |     |          |         |            |
|---------------------------------|------------------------|-------------|----------|--------------------------|-------------|----------|----------|--------------|-----|----------|---------|------------|
| Lachnospiraceae_NK4A136_group   | <0.0001(<0.001,0.0002) | 0.001862128 | 6.63E-04 | <0.0001(<0.0001,<0.0001) | 2.60E-05    | 2.07E-05 | 9.65E-08 | -5.333133427 | *** | 7.08E-07 | <0.0001 | ***<0.0001 |
| Lactobacillales_unclassified    | 0.0002(<0.001,0.0007)  | 9.23E-04    | 2.35E-04 | <0.0001(<0.0001,0.0008)  | 0.00176525  | 6.42E-04 | 0.026445 | -2.219611311 | *   | 0.04451  | 0.0264  | * 0.0264   |
| F0332                           | 0.0002(<0.001,0.0005)  | 0.001143372 | 3.56E-04 | <0.0001(<0.0001,0.0002)  | 0.001232417 | 9.28E-04 | 4.01E-04 | -3.539394506 | *** | 0.00106  | 0.0004  | ***0.0004  |
| Bergeyella                      | 0.0011(0.0005,0.0018)  | 0.001459298 | 1.55E-04 | <0.0001(<0.0001,0.0004)  | 4.79E-04    | 1.20E-04 | 1.37E-09 | -6.059206237 | *** | 1.62E-08 | <0.0001 | ***<0.0001 |
| Filifactor                      | 0.0007(0.0002,0.0019)  | 0.001475734 | 2.36E-04 | <0.0001(<0.0001,0.0003)  | 3.07E-04    | 8.76E-05 | 1.82E-08 | -5.627843298 | *** | 1.52E-07 | <0.0001 | ***<0.0001 |
| Dialister                       | 0.0006(0.0002,0.0015)  | 0.001279957 | 2.42E-04 | <0.0001(<0.0001,0.0003)  | 6.37E-04    | 2.80E-04 | 1.31E-08 | -5.68532837  | *** | 1.12E-07 | <0.0001 | ***<0.0001 |
| P5D1-392                        | <0.0001(<0.001,0.0002) | 1.61E-04    | 3.06E-05 | 0.0007(<0.0001,0.0027)   | 0.002654688 | 6.14E-04 | 1.12E-08 | -5.711994659 | *** | 1.01E-07 | <0.0001 | ***<0.0001 |
| Saccharimonadaceae              | 0.0003(<0.001,0.0006)  | 0.00102933  | 3.54E-04 | <0.0001(<0.0001,0.0003)  | 8.47E-04    | 2.96E-04 | 0.00239  | -3.036953253 | **  | 0.00522  | 0.0024  | ** 0.0024  |
| Acinetobacter                   | 0.0001(<0.001,0.0007)  | 0.001232989 | 3.64E-04 | <0.0001(<0.0001,0.0001)  | 2.66E-05    | 1.17E-05 | 6.65E-11 | -6.528285878 | *** | 1.26E-09 | <0.0001 | ***<0.0001 |
| Sphingomonas                    | <0.0001(<0.001,0.0004) | 0.001183681 | 4.51E-04 | <0.0001(<0.0001,0.0001)  | 2.12E-05    | 1.26E-05 | 2.63E-07 | -5.148471702 | *** | 1.72E-06 | <0.0001 | ***<0.0001 |
| Bifidobacterium                 | <0.0001(<0.001,0.0003) | 7.76E-04    | 2.59E-04 | <0.0001(<0.0001,0.0001)  | 2.57E-04    | 1.79E-04 | 6.41E-06 | -4.512431283 | *** | 2.67E-05 | <0.0001 | ***<0.0001 |
| Leptotrichiaceae_uncultured     | <0.0001(<0.001,0.0001) | 8.48E-04    | 4.17E-04 | <0.0001(<0.0001,0.0001)  | 2.31E-06    | 2.31E-06 | 0.035812 | -2.099058837 | *   | 0.05836  | 0.0358  | * 0.0358   |
| Megamonas                       | <0.0001(<0.001,0.0002) | 8.13E-04    | 2.77E-04 | <0.0001(<0.0001,0.0001)  | 4.45E-05    | 3.48E-05 | 2.14E-07 | -5.186417065 | *** | 1.44E-06 | <0.0001 | ***<0.0001 |
| Burkholderiales_unclassified    | <0.0001(<0.001,0.0001) | 1.17E-04    | 2.21E-05 | 0.0001(<0.0001,0.0014)   | 0.001328667 | 4.09E-04 | 0.001292 | -3.217859975 | **  | 0.00301  | 0.0013  | ** 0.0013  |
| Selenomonadaceae_uncultured     | <0.0001(<0.001,0.0001) | 7.16E-04    | 3.17E-04 | <0.0001(<0.0001,0.0001)  | 6.81E-06    | 3.97E-06 | 4.63E-06 | -4.580941483 | *** | 2.10E-05 | <0.0001 | ***<0.0001 |
| [Eubacterium]_ruminantium_group | <0.0001(<0.001,0.0002) | 7.14E-04    | 2.51E-04 | <0.0001(<0.0001,0.0001)  | 5.42E-06    | 5.03E-06 | 4.35E-09 | -5.870423544 | *** | 4.18E-08 | <0.0001 | ***<0.0001 |
| Christensenellaceae_R-7_group   | <0.0001(<0.001,0.0002) | 5.87E-04    | 1.82E-04 | <0.0001(<0.0001,0.0001)  | 3.20E-05    | 1.86E-05 | 4.25E-07 | -5.057511269 | *** | 2.67E-06 | <0.0001 | ***<0.0001 |
| Phascolarctobacterium           | <0.0001(<0.001,0.0001) | 4.86E-04    | 2.19E-04 | <0.0001(<0.0001,0.0001)  | 3.25E-05    | 2.32E-05 | 4.97E-06 | -4.566172336 | *** | 2.19E-05 | <0.0001 | ***<0.0001 |
| Agathobacter                    | <0.0001(<0.001,0.0001) | 4.40E-04    | 1.56E-04 | <0.0001(<0.0001,0.0001)  | 1.08E-04    | 8.02E-05 | 4.30E-04 | -3.520849724 | *** | 0.00112  | 0.0004  | ***0.0004  |
| Gracilibacteria                 | <0.0001(<0.001,0.0002) | 4.63E-04    | 2.52E-04 | <0.0001(<0.0001,0.0001)  | 1.49E-05    | 8.95E-06 | 3.85E-07 | -5.076174997 | *** | 2.47E-06 | <0.0001 | ***<0.0001 |
| Prevotellaceae_NK3B31_group     | <0.0001(<0.001,0.0001) | 4.26E-04    | 2.02E-04 | <0.0001(<0.0001,0.0001)  | 4.79E-07    | 4.79E-07 | 0.049209 | -1.966778273 | *   | 0.07503  | 0.0492  | * 0.0492   |
| Mucispirillum                   | <0.0001(<0.001,0.0001) | 4.09E-04    | 2.95E-04 | <0.0001(<0.0001,0.0001)  | 0           | 0        | 0.038758 | -2.06674489  | *   | 0.06091  | 0.0388  | * 0.0388   |
| Serratia                        | <0.0001(<0.001,0.0002) | 3.75E-04    | 2.29E-04 | <0.0001(<0.0001,0.0001)  | 1.54E-05    | 5.25E-06 | 5.75E-06 | -4.535467808 | *** | 2.43E-05 | <0.0001 | ***<0.0001 |
| Acidovorax                      | <0.0001(<0.001,0.0001) | 3.02E-04    | 1.25E-04 | <0.0001(<0.0001,0.0001)  | 9.21E-06    | 3.62E-06 | 3.85E-05 | -4.116538283 | *** | 1.32E-04 | <0.0001 | ***<0.0001 |

**Table S5. The relative abundance and distribution of the key 57 OTUs**

|                                          | H002     | H003     | H004     | H005     | H008     | H009     | H010     | H011     | H013     | H015     |
|------------------------------------------|----------|----------|----------|----------|----------|----------|----------|----------|----------|----------|
| OTU796 (Rothia)                          | 0        | 0        | 0        | 0.000422 | 0        | 0        | 0        | 0        | 0.00012  | 0        |
| OTU813 (Rothia)                          | 0        | 0        | 0        | 4.98E-05 | 0        | 0        | 0        | 0        | 0        | 0        |
| OTU744 (Leptotrichia)                    | 0.000111 | 0        | 0        | 0.001054 | 5.81E-05 | 3.28E-05 | 0        | 0        | 0.001946 | 0.001853 |
| OTU748 (Leptotrichia)                    | 0        | 0        | 0        | 0.00016  | 0        | 0        | 0        | 0        | 0        | 0.000113 |
| OTU762 (Streptococcus)                   | 0.000139 | 0        | 0        | 0.000268 | 0        | 0        | 0.001438 | 0        | 0.00157  | 0.000221 |
| OTU658 (P5D1-392)                        | 0        | 0        | 0        | 0.000115 | 0        | 0        | 0        | 0        | 0.00036  | 0.000554 |
| OTU599 (Burkholderiales_unclassified)    | 0        | 0        | 0        | 0.000281 | 0        | 0        | 0        | 0        | 0.001129 | 0.000272 |
| OTU734 (Streptococcus)                   | 0        | 0        | 0        | 0        | 0        | 0        | 0        | 0        | 0.000109 | 0.000376 |
| OTU34 (Halomonas)                        | 0.000353 | 0.001022 | 0.000122 | 0.000181 | 6.84E-05 | 5.28E-05 | 0.002608 | 0.000719 | 0        | 4.65E-05 |
| OTU162 (Rhizobiaceae_unclassified)       | 0        | 0        | 0        | 0        | 0        | 0        | 0        | 0        | 0        | 0        |
| OTU138 (Pelagibacterium)                 | 0        | 0        | 0        | 0        | 0        | 0        | 0        | 0        | 0        | 0        |
| OTU123 (Xanthomonadaceae_unclassified)   | 0        | 0        | 0        | 0        | 0        | 0        | 0        | 0        | 0        | 0        |
| OTU12 (Gemella)                          | 0.002162 | 0.02162  | 0.001775 | 0.022205 | 0.006993 | 0.007181 | 0.01162  | 0.003409 | 0.004386 | 0.003972 |
| OTU1 (Streptococcus)                     | 0.092913 | 0.225843 | 0.028655 | 0.068001 | 0.093629 | 0.052115 | 0.183993 | 0.140543 | 0.079214 | 0.054509 |
| OTU84 (Streptococcus)                    | 0.009296 | 0.017379 | 0.003094 | 0.003334 | 0.018318 | 0.004425 | 0.019653 | 0.017191 | 0.005694 | 0.006209 |
| OTU104 (Catonella)                       | 0.00456  | 0.000592 | 0.002873 | 0.006251 | 0.002585 | 0.008038 | 0.0014   | 0.004881 | 0.002052 | 0.002604 |
| OTU4 (Prevotella)                        | 0.116394 | 0.136927 | 0.073231 | 0.164448 | 0.319775 | 0.041436 | 0.110746 | 0.259281 | 0.197486 | 0.092929 |
| OTU523 (Prevotella)                      | 0.007474 | 0.010884 | 0.005812 | 0.011922 | 0.019228 | 0.002133 | 0.007801 | 0.017684 | 0.011093 | 0.004641 |
| OTU15 (Campylobacter)                    | 0.016865 | 0.004834 | 0.004931 | 0.002762 | 0.040767 | 0.010113 | 0.010476 | 0.014345 | 0.004094 | 0.011993 |
| OTU134 (Prevotella)                      | 0.005874 | 0.003201 | 0.00304  | 0.002917 | 0.003994 | 0.006134 | 0.002238 | 0.005983 | 0.01027  | 0.005914 |
| OTU45 (Alloprevotella)                   | 0.042126 | 0.003064 | 0.011309 | 0.033518 | 0.001621 | 0.047838 | 0.011145 | 0.00163  | 0.036123 | 0.013033 |
| OTU10 (Alloprevotella)                   | 0.194623 | 0.091783 | 0.123736 | 0.117943 | 0.198567 | 0.106196 | 0.201187 | 0.211076 | 0.161106 | 0.114955 |
| OTU71 (Alloprevotella)                   | 0.01435  | 0.017054 | 0.000869 | 0.008111 | 0.09591  | 0.002122 | 0.013771 | 0.005437 | 0.001235 | 0.005252 |
| OTU64 (Clostridia_UCG-014)               | 0.002957 | 0.000232 | 0.000703 | 0.008357 | 0.01335  | 0.004137 | 0.00117  | 0.000712 | 0.0079   | 0.00219  |
| OTU76 (Candidatus_Saccharimonas)         | 0.001738 | 0.000236 | 0.000613 | 0.003171 | 0.004179 | 0.001462 | 0.004845 | 0.000284 | 0.00483  | 0.006165 |
| OTU46 (g__Absconditabacteriales_)        | 0.007449 | 0        | 0.017619 | 0.001532 | 0.000684 | 0.019434 | 0.002667 | 0.000251 | 0.001952 | 0.017778 |
| OTU42 (g__Absconditabacteriales_)        | 0.020868 | 0.000254 | 0.003433 | 0.003061 | 0.000325 | 0.009104 | 0.000498 | 0.000491 | 0.006573 | 0.006397 |
| OTU67 (Alloprevotella)                   | 0.003878 | 0.000451 | 0.016636 | 0.001834 | 0.001228 | 0.023673 | 0.00028  | 0.00925  | 0.009144 | 0.019743 |
| OTU57 (Parvimonas)                       | 0.0029   | 0.002424 | 0.002632 | 0.00272  | 0.000154 | 0.006429 | 0.002797 | 0.002318 | 0.006821 | 0.001158 |
| OTU26 (Prevotella)                       | 0.018524 | 0.022179 | 0.054855 | 0.001611 | 0.041167 | 0.053698 | 0.027832 | 0.025767 | 0.012016 | 0.038064 |
| OTU101 (Porphyromonas)                   | 0.004209 | 0.002141 | 0.003782 | 0.001288 | 0.000568 | 0.003877 | 0.000975 | 0.001225 | 0.000931 | 0.003222 |
| OTU9 (Porphyromonas)                     | 0.080043 | 0.072744 | 0.182632 | 0.06323  | 0.010611 | 0.137639 | 0.034803 | 0.00959  | 0.032261 | 0.144234 |
| OTU380 (Porphyromonas)                   | 0.039682 | 0.014094 | 0.020076 | 0.006222 | 0.003344 | 0.021323 | 0.002972 | 0.001818 | 0.002984 | 0.020894 |
| OTU2 (Fusobacterium)                     | 0.101099 | 0.08244  | 0.183892 | 0.389006 | 0.055598 | 0.298083 | 0.03955  | 0.023635 | 0.250056 | 0.266542 |
| OTU678 (Neisseria)                       | 0.000119 | 0.00468  | 0.0379   | 0.019739 | 0.005358 | 0.002909 | 0.007969 | 0.000144 | 0.002961 | 0.029248 |
| OTU365 (Fusobacterium)                   | 0.027671 | 0.006092 | 0.012432 | 0.029502 | 0.006018 | 0.020311 | 0.041964 | 0.022654 | 0.024933 | 0.018489 |
| OTU75 (Porphyromonas)                    | 0.020444 | 0.00111  | 0.015174 | 0.006366 | 0.000865 | 0.007244 | 0.004045 | 0.007467 | 0.043621 | 0.000824 |
| OTU169 (Treponema)                       | 0.001287 | 0        | 0.000146 | 6.82E-05 | 5.47E-05 | 4.91E-05 | 0        | 0.000214 | 0.000248 | 0        |
| OTU29 (Porphyromonas)                    | 0.013277 | 0        | 0.001292 | 0.003835 | 0        | 0.001134 | 0        | 0.005018 | 0.009838 | 0.00037  |
| OTU103 (Tannerella)                      | 0.00161  | 0        | 0.000161 | 0.000365 | 8.89E-05 | 3.28E-05 | 0.000352 | 0        | 0.000862 | 0        |
| OTU87 (Corynebacterium)                  | 0.001149 | 0.001394 | 0.000116 | 6.03E-05 | 0.000472 | 0.000144 | 0.00109  | 0.00998  | 0        | 0.005292 |
| OTU172 (Prevotella)                      | 0.002963 | 0.000304 | 0.000188 | 0.000236 | 0.000479 | 0        | 0.001767 | 0.001249 | 0.000809 | 0.000166 |
| OTU114 (Prevotella)                      | 0.007911 | 0.000248 | 0.000131 | 0.000351 | 0        | 0.000231 | 0.001429 | 0.001625 | 0.001829 | 0.000257 |
| OTU119 (Prevotella)                      | 0.000416 | 0.000276 | 6.25E-05 | 0.000354 | 0.000291 | 0        | 0.007914 | 0.000507 | 0.000337 | 0.000272 |
| OTU131 (Pseudomonas)                     | 0.000633 | 0.000821 | 0.00028  | 0        | 7.18E-05 | 0.001118 | 0.005049 | 0.000156 | 0        | 0        |
| OTU31 (Pseudomonas)                      | 0.00629  | 0.010636 | 0.001647 | 0.001154 | 0.002086 | 0.006314 | 0.055054 | 0.009053 | 0        | 0.000201 |
| OTU129 (Acinetobacter)                   | 0.00044  | 0.001886 | 0.000301 | 7.61E-05 | 0.000417 | 0.002119 | 0.007165 | 0.003748 | 0.000148 | 4.43E-05 |
| OTU126 ([Eubacterium]_ruminantium_group) | 0.000462 | 0.001609 | 7.44E-05 | 0        | 0.000181 | 0.001696 | 0.004553 | 0.005853 | 0        | 6.20E-05 |
| OTU252 (Prevotella)                      | 0.004068 | 0.013249 | 0.000569 | 0.000233 | 0.000619 | 0.018708 | 0.036839 | 0.053151 | 0        | 4.65E-05 |
| OTU85 (Prevotella)                       | 0.001149 | 0.005113 | 0.00025  | 5.51E-05 | 0.000605 | 0.006842 | 0.01281  | 0.01727  | 0        | 6.20E-05 |
| OTU82 (Faecalibacterium)                 | 0.002816 | 0.007411 | 0.000503 | 0.000121 | 0.000602 | 0.012796 | 0.024335 | 0.03472  | 0        | 0.000299 |
| OTU69 (Fusicatibacter)                   | 0.00104  | 0.003257 | 0.000152 | 5.25E-05 | 0.000513 | 0.006371 | 0.01172  | 0.019277 | 0        | 0        |
| OTU39 (Haemophilus)                      | 0.003482 | 0.039233 | 0.000342 | 4.98E-05 | 0.001443 | 0.004652 | 0.001261 | 0.006367 | 0.001486 | 0.000819 |
| OTU62 (Aggregatibacter)                  | 0.006409 | 0.002197 | 0.000402 | 5.77E-05 | 0.000386 | 0.002963 | 0.000707 | 0.000607 | 0.001138 | 0.000531 |
| OTU171 (Aggregatibacter)                 | 0.003742 | 0.006418 | 0.000381 | 0.000123 | 0.001022 | 0.00067  | 0        | 0.002109 | 0.000555 | 0.000999 |
| OTU5 (Haemophilus)                       | 0.097856 | 0.07617  | 0.180524 | 0.011227 | 0.036086 | 0.036807 | 0.07751  | 0.026084 | 0.053501 | 0.095584 |
| OTU20 (Actinobacillus)                   | 0.00418  | 0.086496 | 0.000649 | 0        | 0.009619 | 0.000215 | 0        | 0.015226 | 0.004275 | 0.000598 |

| H017     | H019     | H020     | H021     | H023     | H024     | H025     | H027     | H028     | H029     | H032     | H034     | H035     | H036     |
|----------|----------|----------|----------|----------|----------|----------|----------|----------|----------|----------|----------|----------|----------|
| 0        | 5.21E-05 | 0        | 0        | 0        | 0        | 0        | 0        | 0        | 0        | 0        | 0.00011  | 0        | 0.000378 |
| 0        | 0        | 0        | 0        | 0        | 0        | 0        | 0        | 0        | 0        | 0        | 0        | 0        | 0        |
| 0.000339 | 0.00036  | 0.001301 | 0.000139 | 0.002141 | 0.003088 | 6.29E-05 | 0.000232 | 0.000129 | 0        | 0.001    | 0        | 0        | 0.000882 |
| 0        | 0        | 0        | 0        | 0        | 0.000458 | 0        | 0        | 0        | 0        | 0        | 0        | 0        | 0        |
| 0.001088 | 0.000258 | 0.00013  | 0        | 0.000376 | 0.003617 | 0.001807 | 0        | 0.000587 | 0        | 0        | 0        | 0.000381 | 0.001278 |
| 0.000381 | 0.0003   | 0        | 5.33E-05 | 7.48E-05 | 0.000809 | 0.000302 | 0        | 0        | 0        | 0        | 0        | 0.000265 | 0.000696 |
| 0.001949 | 0        | 0        | 4.48E-05 | 0.000176 | 0.00301  | 5.03E-05 | 0        | 0        | 0        | 0        | 0        | 0.000215 | 0.00015  |
| 0.000451 | 0        | 0        | 0        | 0        | 0        | 0        | 0        | 0        | 0        | 0        | 0        | 0.000255 | 0        |
| 0.000119 | 0        | 0.000278 | 0.000574 | 0        | 0        | 0.000134 | 0.000549 | 0        | 0.000395 | 0.000645 | 0        | 0.00024  | 0        |
| 0        | 0        | 0        | 0        | 0        | 0        | 0        | 0        | 0        | 0        | 0        | 0        | 0        | 0        |
| 0        | 0        | 0        | 0        | 0        | 0        | 0        | 0        | 0        | 0        | 0        | 0        | 0        | 0        |
| 0        | 0        | 0        | 0        | 0        | 0        | 0        | 0        | 0        | 0        | 0        | 0        | 0        | 0        |
| 0.009468 | 0.006509 | 0.012811 | 0.015155 | 0.015026 | 0.003855 | 0.02348  | 0.006471 | 0.006879 | 0.015386 | 0.011578 | 0.007931 | 0.009334 | 0.011714 |
| 0.072009 | 0.046601 | 0.118327 | 0.127305 | 0.095203 | 0.051217 | 0.049093 | 0.092182 | 0.052485 | 0.1055   | 0.117106 | 0.087343 | 0.067565 | 0.054481 |
| 0.004444 | 0.009979 | 0.0097   | 0.009565 | 0.006255 | 0.006955 | 0.010486 | 0.009415 | 0.00326  | 0.020376 | 0.010486 | 0.014787 | 0.004824 | 0.006404 |
| 0.002785 | 0.005774 | 0.001026 | 0.008131 | 0.0016   | 0.003064 | 0.007026 | 0.001354 | 0.003375 | 0.002151 | 0.001494 | 0.005019 | 0.003153 | 0.001297 |
| 0.053342 | 0.26801  | 0.097066 | 0.177898 | 0.192507 | 0.318871 | 0.063267 | 0.03628  | 0.238386 | 0.154482 | 0.013613 | 0.388493 | 0.097926 | 0.437658 |
| 0.003083 | 0.017588 | 0.006326 | 0.010323 | 0.008705 | 0.015016 | 0.003875 | 0.001219 | 0.011641 | 0.011147 | 0.001254 | 0.018935 | 0.007925 | 0.029052 |
| 0.001183 | 0.04731  | 0.006215 | 0.003879 | 0.009387 | 0.013136 | 0.012939 | 0.017675 | 0.035019 | 0.027114 | 0.00405  | 0.021705 | 0.002059 | 0.007512 |
| 0.00387  | 0.010672 | 0.005546 | 0.002432 | 0.006455 | 0.011107 | 0.005171 | 0.000391 | 0.003228 | 0.001277 | 0.000544 | 0.002492 | 0.000566 | 0.003127 |
| 0.007292 | 0.03181  | 0.013869 | 0.026212 | 0.016597 | 0.000952 | 0.010228 | 0.000664 | 0.034399 | 0.007041 | 0.022257 | 0.023801 | 0.008352 | 0.010485 |
| 0.061302 | 0.242646 | 0.215518 | 0.059624 | 0.103003 | 0.277643 | 0.072809 | 0.088537 | 0.092938 | 0.237361 | 0.066108 | 0.05297  | 0.120474 | 0.077874 |
| 0.001148 | 0.049966 | 0.01288  | 0.00881  | 0.023735 | 0.000494 | 0.000503 | 0.014977 | 0.071054 | 0.03383  | 0.011773 | 0.025575 | 0.000308 | 0.003152 |
| 0.001008 | 0.001413 | 0.00455  | 0.004056 | 0.002663 | 0        | 0.006037 | 0.000829 | 0.002867 | 0.000406 | 0.012329 | 0.012522 | 8.75E-05 | 0.005048 |
| 0.000826 | 0.00263  | 0.003342 | 0.003932 | 0.001772 | 0.000666 | 0.001271 | 0.000546 | 0.003601 | 0.000597 | 0.003357 | 0.004458 | 0.001909 | 0.002339 |
| 0.00845  | 0.000644 | 0.00439  | 0.005212 | 0.006926 | 0.004034 | 0.007435 | 0.11366  | 0.023355 | 0.002145 | 0.001325 | 0.033282 | 0.013643 | 0.013832 |
| 0.000759 | 6.00E-05 | 0.0012   | 0.004607 | 0.013897 | 0        | 0.009744 | 0.001876 | 9.40E-05 | 0.000511 | 0.018725 | 0.002335 | 0.003792 | 0.000345 |
| 0.010255 | 0.001408 | 0.002469 | 0.009638 | 0.04123  | 0.008864 | 0.016611 | 0        | 0.003263 | 0.000296 | 0.019707 | 0.005419 | 0.025681 | 0.003642 |
| 0.00802  | 0.00166  | 0.005135 | 0.007713 | 0.007239 | 0        | 0.013539 | 0        | 0.002291 | 0.001304 | 0.002603 | 0.000914 | 0.017985 | 0.003334 |
| 0.038079 | 0.035603 | 0.062014 | 0.0098   | 0.024192 | 0.032845 | 0.041005 | 0.114903 | 0.049303 | 0.029813 | 0.011903 | 0.037489 | 0.062919 | 0.027204 |
| 0.005924 | 0.000308 | 0.003502 | 0.004664 | 0.015257 | 0.006913 | 0.007374 | 0.003389 | 0.002852 | 0.002145 | 0.021091 | 0.000624 | 0.006665 | 0.002721 |
| 0.120722 | 0.004961 | 0.075848 | 0.031032 | 0.08301  | 0.004682 | 0.15102  | 0.208204 | 0.083811 | 0.074975 | 0.009945 | 0.016082 | 0.128603 | 0.027411 |
| 0.034906 | 0.000646 | 0.014092 | 0.004707 | 0.016692 | 0.001624 | 0.063319 | 0.002894 | 0.011902 | 0.006283 | 0.000701 | 0.001864 | 0.040053 | 0.010637 |
| 0.134217 | 0.145761 | 0.149168 | 0.177723 | 0.135942 | 0.004527 | 0.174777 | 0.060777 | 0.101397 | 0.037596 | 0.198519 | 0.058998 | 0.096838 | 0.167563 |
| 0.128738 | 0.000441 | 0.031259 | 0.002558 | 0.007008 | 0.145946 | 0.000461 | 0.029206 | 0.015077 | 0.004441 | 0.001958 | 0.009819 | 0.000735 | 0.006289 |
| 0.044147 | 0.01368  | 0.019621 | 0.047497 | 0.020519 | 0.003272 | 0.026009 | 0.004191 | 0.008377 | 0.01544  | 0.053302 | 0.010195 | 0.071861 | 0.019601 |
| 0.026634 | 0.001595 | 0.003067 | 0.03771  | 0.016082 | 0.001541 | 0.009807 | 0.000125 | 0.00712  | 0.001449 | 0.003289 | 0.005588 | 0.035003 | 0.001215 |
| 0.001645 | 0.000117 | 0        | 0.000988 | 0        | 0        | 0.000411 | 0        | 0        | 0        | 0.000849 | 0.00042  | 0        | 0.000123 |
| 0.029342 | 0.006465 | 0.012405 | 0.107729 | 0.003669 | 0.001077 | 0.015009 | 0.000101 | 0.001351 | 0.019914 | 0.002328 | 0.004293 | 0.034808 | 0.005364 |
| 0.000857 | 0.000211 | 0.002236 | 0.003636 | 0.00028  | 0        | 0.001503 | 0        | 0.0002   | 0.001078 | 0.000388 | 0.000958 | 0.001976 | 0.000125 |
| 0.023713 | 0.001006 | 0.001658 | 0.03462  | 0.000836 | 0.006056 | 0.00021  | 0.001462 | 0.001269 | 0.000347 | 0.167047 | 0.000518 | 0.000461 | 0.00022  |
| 0.003877 | 0.000279 | 0.001193 | 0.002296 | 0.001052 | 0.000268 | 0.001472 | 0.000657 | 0.000761 | 0.007818 | 0.011933 | 0.000255 | 0.002083 | 0.000484 |
| 0.00451  | 0        | 0.001945 | 0.009298 | 0.0028   | 0.000756 | 0.00672  | 0.000236 | 0.000884 | 0.004165 | 0.098336 | 0.000471 | 0.001324 | 0        |
| 0.005654 | 0        | 0.000145 | 0.00226  | 0.001065 | 0.000482 | 0.00311  | 0.000933 | 0.000928 | 0.003022 | 0.030347 | 0        | 0.001278 | 0        |
| 0        | 0.000149 | 5.90E-05 | 0.000241 | 9.02E-05 | 0        | 0.000327 | 0.000616 | 0.000129 | 0.000492 | 0.000388 | 0        | 7.12E-05 | 0        |
| 0.000493 | 0.001061 | 0.003421 | 0.002697 | 0.000634 | 0.000202 | 0.001021 | 0.005925 | 0.001081 | 0.006326 | 0.003863 | 0.00051  | 0.002234 | 0        |
| 0        | 0.000112 | 0.000814 | 0.000444 | 0.000165 | 0        | 9.44E-05 | 0.006805 | 0        | 0.001057 | 0.000737 | 8.63E-05 | 0.000203 | 0        |
| 0        | 0        | 0.000394 | 0.00013  | 9.90E-05 | 0        | 3.15E-05 | 0.002469 | 0        | 0.000997 | 0.000195 | 0        | 5.49E-05 | 0        |
| 0.000101 | 0.000683 | 0.002622 | 0.000683 | 0        | 0        | 0.000149 | 0.021448 | 0        | 0.005829 | 0.001624 | 0        | 0.004447 | 0.000217 |
| 0        | 0.000167 | 0.000674 | 0.00039  | 0        | 0        | 0.00017  | 0.005845 | 0        | 0.001234 | 0.000231 | 0        | 0.003425 | 0        |
| 0.000112 | 0.000334 | 0.002272 | 0.000288 | 0.000218 | 0.000149 | 0.000174 | 0.015516 | 9.69E-05 | 0.004519 | 0.001044 | 0.000235 | 0.001134 | 0.000109 |
| 0.000105 | 4.95E-05 | 0.000954 | 9.39E-05 | 7.48E-05 | 0.00022  | 0.000101 | 0.007017 | 0        | 0.002132 | 0.000408 | 0.000145 | 0.004554 | 0.00024  |
| 0.000504 | 0.000454 | 0.003748 | 0.003023 | 0.015001 | 0        | 0.005605 | 0.000559 | 0.001939 | 0.003861 | 0.015406 | 0.000883 | 0.005681 | 0.003063 |
| 0.004503 | 0.000287 | 0.001702 | 0.002095 | 0.017984 | 0.003486 | 0.000717 | 0.000718 | 0.001439 | 0.000828 | 0.011886 | 0.005545 | 0.001168 | 0.000784 |
| 0.006305 | 0.000759 | 0.006822 | 0.003653 | 0.001395 | 0.012202 | 0.00135  | 0.000478 | 0.00074  | 0.005213 | 0.017482 | 0.001271 | 0.004132 | 0.004834 |
| 0.130981 | 0.037488 | 0.070147 | 0.016438 | 0.063738 | 0.040431 | 0.164903 | 0.117464 | 0.078612 | 0.137391 | 0.009324 | 0.131774 | 0.100965 | 0.046776 |
| 0.00036  | 0.001736 | 0.006136 | 0.008003 | 0.017231 | 0.006467 | 0.007278 | 0.001206 | 0.041875 | 0.000317 | 0.00552  | 0.003885 | 0.000381 | 0.000339 |

| H039     | H040     | H041     | H044     | H048     | H049     | H051     | H053     | H057     | H058     | H059     | H060     | H061     | H062     |
|----------|----------|----------|----------|----------|----------|----------|----------|----------|----------|----------|----------|----------|----------|
| 0.000181 | 0        | 0        | 0        | 0.000455 | 0        | 0        | 0        | 0        | 0        | 0        | 0        | 0        | 0        |
| 0        | 0        | 0        | 0        | 0        | 0        | 0        | 0        | 0        | 0        | 0        | 0        | 0        | 0        |
| 0.010284 | 0.000253 | 0.00905  | 0        | 0        | 0.000566 | 0        | 0        | 0.000182 | 0        | 0        | 0        | 0.000906 | 6.30E-05 |
| 0.00098  | 0        | 0.000499 | 0        | 0        | 0        | 0        | 0        | 0        | 0        | 0        | 0        | 0.000395 | 0        |
| 0.001298 | 0        | 0.000626 | 0        | 0.000457 | 0.000613 | 0        | 0.00238  | 5.70E-05 | 0        | 0.000586 | 0.000298 | 0.001934 | 0        |
| 0.000952 | 0        | 0.000499 | 0        | 0.000151 | 0        | 0        | 0        | 0        | 0        | 0        | 0        | 0.003173 | 0        |
| 0.00011  | 0        | 0.000254 | 0        | 0.001569 | 0        | 0        | 0        | 0        | 0        | 0        | 0        | 0.001594 | 0        |
| 0.000243 | 0        | 0        | 0        | 0        | 0        | 0        | 0        | 0        | 0        | 0        | 0        | 0.000873 | 0        |
| 0        | 0.00097  | 0.000308 | 0.00031  | 0.000583 | 0.00042  | 0.000183 | 0        | 0.000209 | 0        | 0        | 0.001081 | 0        | 0.003977 |
| 0        | 0        | 0        | 0        | 0        | 0        | 0        | 0        | 0        | 0        | 0        | 0        | 0        | 0        |
| 0        | 0        | 0        | 0        | 0        | 0        | 0        | 0        | 0        | 0        | 0        | 0        | 0        | 0        |
| 0        | 0        | 0        | 0        | 0        | 0        | 0        | 0        | 0        | 0        | 0        | 0        | 0        | 0        |
| 0.011898 | 0.013524 | 0.00292  | 0.016292 | 0.023665 | 0.020191 | 0.012426 | 0.000878 | 0.007934 | 0        | 0.012514 | 0.00249  | 0.014877 | 0.015832 |
| 0.0837   | 0.132551 | 0.073875 | 0.090927 | 0.106684 | 0.06778  | 0.136082 | 0.018317 | 0.076749 | 0.069786 | 0.064381 | 0.078864 | 0.104526 | 0.131852 |
| 0.008672 | 0.010761 | 0.011443 | 0.016881 | 0.009817 | 0.007005 | 0.012055 | 0.001705 | 0.008627 | 0.009287 | 0.005075 | 0.012885 | 0.006224 | 0.027829 |
| 0.004124 | 0.001442 | 0.006075 | 0.003132 | 0.000614 | 0.001281 | 0.003302 | 0        | 0.00662  | 0.000507 | 0.002786 | 0.004799 | 0.001735 | 0.006268 |
| 0.061928 | 0.086797 | 0.253371 | 0.301021 | 0.070718 | 0.066704 | 0.068559 | 0.008756 | 0.306397 | 0.057646 | 0.016975 | 0.107064 | 0.084589 | 0.103645 |
| 0.005799 | 0.007621 | 0.011942 | 0.026893 | 0.005722 | 0.003882 | 0.00466  | 0        | 0.022939 | 0.005014 | 0.000724 | 0.008384 | 0.006284 | 0.008759 |
| 0.013805 | 0.012893 | 0.041421 | 0.009511 | 0.002879 | 0.011172 | 0.00262  | 0        | 0.081511 | 0.011034 | 0.002899 | 0.021553 | 0.003889 | 0.006882 |
| 0.009177 | 0.004886 | 0.003618 | 0.002114 | 0.002191 | 0.00447  | 0.002293 | 0        | 0.020842 | 0.001027 | 0        | 0.003778 | 0.009512 | 0.00329  |
| 0.008064 | 0.059664 | 0.048848 | 0.001855 | 0.003572 | 0.001286 | 0.023731 | 0.000288 | 0.000921 | 0.00246  | 0.000842 | 0.049905 | 0.011322 | 0.005446 |
| 0.159282 | 0.134686 | 0.273066 | 0.018537 | 0.011843 | 0.036333 | 0.176529 | 0.001223 | 0.047424 | 0.037166 | 0.011711 | 0.297642 | 0.062939 | 0.039025 |
| 0.014607 | 0.13672  | 0.006737 | 0.000545 | 0.021016 | 0.000698 | 0.005132 | 0        | 0.000206 | 0.00492  | 0        | 0.029499 | 0.001102 | 0.001422 |
| 0.01808  | 0.003666 | 0.037985 | 0.00239  | 0.000983 | 0.000368 | 0.001503 | 0        | 0.008945 | 0.000238 | 0        | 0.001055 | 0.002948 | 0.001283 |
| 0.0032   | 0.007935 | 0.032907 | 0.000616 | 0.001118 | 0.004004 | 0.001931 | 0.000918 | 0.002102 | 0.001492 | 0.003665 | 0.003193 | 0.001537 | 0.000455 |
| 0.00037  | 0.006756 | 0.000807 | 0.000357 | 0.00192  | 0.021117 | 0.00851  | 0.004133 | 0.035912 | 0.007619 | 0.00958  | 0.001094 | 0.00508  | 0.005363 |
| 0.000172 | 0.003391 | 0        | 0.000441 | 0.001786 | 0.014092 | 0.007108 | 0        | 0.026745 | 0        | 0.000597 | 0.001233 | 0.004983 | 0.001416 |
| 3.01E-05 | 0.001601 | 0.001152 | 0.000224 | 0.001786 | 0.015181 | 0.042479 | 0        | 0        | 0.000267 | 0.00092  | 0.004831 | 0.009146 | 0.019932 |
| 0.001027 | 0.004714 | 0.000689 | 0.002237 | 0.004007 | 0.012323 | 0.01247  | 0        | 0.003194 | 0        | 0.011171 | 0.005565 | 0.001541 | 0.003945 |
| 0.019582 | 0.020113 | 0.007844 | 0.007747 | 0.068979 | 0.03096  | 0.020176 | 0        | 0.025365 | 0.011217 | 0.012862 | 0.000943 | 0.015027 | 0.022934 |
| 0.004079 | 0.00209  | 0.001306 | 0.000522 | 0.004525 | 0.001201 | 0.004139 | 0        | 0.000608 | 0.000772 | 0.002069 | 0.000705 | 0.008822 | 0.001483 |
| 0.094212 | 0.017334 | 0.01012  | 0.012404 | 0.06131  | 0.07196  | 0.062766 | 0.014644 | 0.018308 | 0.043608 | 0.099842 | 0.006521 | 0.118951 | 0.080351 |
| 0.04086  | 0.004991 | 0.000889 | 0.003452 | 0.015563 | 0.005488 | 0.011111 | 0.000278 | 0.004167 | 0.008874 | 0.013275 | 0.000459 | 0.028033 | 0.012017 |
| 0.319209 | 0.06704  | 0.089118 | 0.283992 | 0.076108 | 0.136009 | 0.098868 | 0.00202  | 0.156424 | 0.072424 | 0.062737 | 0.052962 | 0.327523 | 0.100436 |
| 0        | 0.0051   | 0.000834 | 0.001991 | 0.033827 | 0.010268 | 0.005466 | 0.002913 | 0.002716 | 0.000787 | 0.000397 | 0.002745 | 0        | 0.026213 |
| 0.036564 | 0.04253  | 0.016966 | 0.025451 | 0.04094  | 0.11117  | 0.029101 | 0        | 0.01971  | 0.023442 | 0.005347 | 0.017894 | 0.045126 | 0.041706 |
| 0.002947 | 0.016583 | 0.002784 | 0.002821 | 0.073991 | 0.014705 | 0.020264 | 0.000295 | 0.001559 | 0.005642 | 0.000185 | 0.004184 | 0.096439 | 0.012677 |
| 0.000142 | 0.000178 | 0        | 0.000424 | 0.000668 | 0.00032  | 0.000837 | 0        | 0        | 0        | 0        | 0        | 0.000238 | 0.000396 |
| 0        | 0.002776 | 0.000299 | 0.007227 | 0.017617 | 0.155667 | 0.030492 | 0.001163 | 0.004365 | 0        | 0        | 0.030308 | 0.010118 | 0.011486 |
| 0.000355 | 0.000609 | 0.000245 | 0.00019  | 0.00295  | 0.015323 | 0.001965 | 0        | 0.000736 | 0        | 0        | 0.0068   | 0.001281 | 0.002286 |
| 0.000866 | 0.004424 | 0        | 0.000865 | 0.002016 | 0.001144 | 0.000168 | 0        | 0.002515 | 0.002034 | 0        | 0.000667 | 0        | 0.004593 |
| 0.003525 | 0.001098 | 0.003709 | 0.000811 | 0.001096 | 0.000908 | 0.000995 | 0        | 0.002442 | 0.003794 | 0        | 0.002685 | 0.000767 | 0.001499 |
| 0.003048 | 0.000447 | 0.000245 | 0.000111 | 0.000907 | 0.000135 | 0.004479 | 0        | 0.001823 | 0.005216 | 0        | 0.004621 | 0.000214 | 0.000162 |
| 0.001178 | 0.002518 | 0.000916 | 0.000552 | 0.000214 | 0.000501 | 0.002956 | 0        | 0.001393 | 0        | 0        | 0.001585 | 0.000269 | 0.001114 |
| 0        | 0.000778 | 0.000635 | 7.39E-05 | 0.000205 | 0.000836 | 0.000201 | 0.000598 | 0.000212 | 0        | 0        | 0.002031 | 0.000205 | 0.011284 |
| 0.000234 | 0.008938 | 0.005404 | 0.002264 | 0.002065 | 0.007245 | 0.00251  | 0.039175 | 0.001698 | 0.023635 | 0.038625 | 0.022642 | 0.000392 | 0.083629 |
| 6.23E-05 | 0.000575 | 0.000199 | 0.000256 | 0.000167 | 0.000838 | 0.001396 | 0.061866 | 0.000511 | 0.017352 | 0.043596 | 0.016543 | 0        | 0.011561 |
| 0        | 0        | 0        | 5.91E-05 | 0        | 0.000225 | 0.000303 | 0.03642  | 0        | 0.025434 | 0.020769 | 0.003976 | 0        | 0.002264 |
| 0.000155 | 0.000867 | 0.002086 | 0.000473 | 0.000359 | 0.002077 | 0.001846 | 0.340978 | 0.000739 | 0.220678 | 0.199291 | 0.031957 | 0        | 0.018299 |
| 4.94E-05 | 0.000214 | 0.000798 | 5.42E-05 | 0        | 0.000378 | 0.000762 | 0.124071 | 0.00038  | 0.074523 | 0.075419 | 0.011946 | 9.48E-05 | 0.006954 |
| 0.000114 | 0.000589 | 0.000553 | 0.000355 | 0        | 0.001136 | 0.001676 | 0.224822 | 0.000646 | 0.150872 | 0.145426 | 0.022878 | 0        | 0.014414 |
| 0        | 0.000347 | 0.003264 | 7.89E-05 | 0        | 0.000483 | 0.000879 | 0.101693 | 0.000478 | 0.053835 | 0.065493 | 0.009403 | 0        | 0.004944 |
| 0.000361 | 0.003302 | 0        | 0.002099 | 0.091967 | 0.0001   | 0.031067 | 0        | 0.01149  | 0        | 0.004053 | 0.000901 | 0        | 0.000464 |
| 0.000913 | 0.013387 | 0.000907 | 0.000505 | 0.008921 | 0.00024  | 0.006205 | 0.000295 | 0.00088  | 0.000728 | 0.000205 | 0.004271 | 0        | 0.006103 |
| 0.001079 | 0.012934 | 0.001152 | 0.007018 | 0.013306 | 0.000158 | 0.001958 | 0        | 0.000657 | 0.005439 | 0        | 0.009017 | 0        | 0.00365  |
| 0.052166 | 0.091802 | 0.031347 | 0.142204 | 0.208602 | 0.140989 | 0.128408 | 0.010171 | 0.076239 | 0.041229 | 0.065984 | 0.090306 | 0.005232 | 0.11185  |
| 0.000316 | 0.047605 | 0.00029  | 0.001713 | 0.000164 | 5.01E-05 | 0.007434 | 0        | 0.006421 | 0        | 0        | 0.005841 | 0.000157 | 0.018546 |

| H063     | H064     | H065     | H066     | H067     | H070     | H071     | H073     | H074     | H075     | H076     | H078     | H079     | H083     |
|----------|----------|----------|----------|----------|----------|----------|----------|----------|----------|----------|----------|----------|----------|
| 0        | 0        | 0        | 0        | 8.77E-05 | 0.000351 | 0        | 0.000488 | 0        | 0        | 0        | 0.000159 | 0        | 8.16E-05 |
| 0        | 0        | 0        | 0        | 0        | 0        | 0        | 0        | 0        | 0        | 0        | 0        | 0        | 0        |
| 0.000141 | 0.000412 | 6.21E-05 | 5.93E-05 | 7.87E-05 | 0.001738 | 0.000711 | 0.000741 | 0        | 0        | 0.004609 | 0.002824 | 0.000722 | 0.000343 |
| 0        | 0        | 0        | 0        | 0        | 0.002145 | 0.000762 | 0.000677 | 0        | 0        | 0.000102 | 0.001039 | 0.000433 | 0        |
| 0        | 0.001008 | 0        | 0        | 7.20E-05 | 0.000619 | 0.000391 | 0.002251 | 6.29E-05 | 0        | 0.00022  | 0.002253 | 0.000953 | 0.00042  |
| 0        | 0.000364 | 2.36E-05 | 0        | 0.000196 | 0.000471 | 0.000623 | 0.001789 | 5.64E-05 | 0        | 0        | 0.002182 | 0.001142 | 0.000394 |
| 0        | 0.001133 | 0        | 0        | 0.000272 | 0.000855 | 0        | 7.52E-05 | 0.000141 | 0        | 0        | 0.000689 | 0        | 0.000606 |
| 0        | 6.74E-05 | 0        | 0        | 0        | 0        | 0        | 0        | 6.94E-05 | 0        | 0        | 0.000419 | 0        | 0.000235 |
| 0.000394 | 0.000217 | 0.000504 | 0.006311 | 0.000238 | 7.68E-05 | 8.79E-05 | 0.000293 | 0        | 0.00566  | 0        | 0        | 0        | 0.000131 |
| 0        | 0        | 0        | 0        | 0        | 0        | 0        | 0        | 0        | 0        | 0        | 0        | 0        | 0        |
| 0        | 0        | 0        | 0        | 0        | 0        | 0        | 0        | 0        | 0        | 0        | 0        | 0        | 0        |
| 0        | 0        | 0        | 0        | 0        | 0        | 0        | 0        | 0        | 0        | 0        | 0        | 0        | 0        |
| 0.016773 | 0.004396 | 0.015383 | 0.00908  | 0.00562  | 0.061731 | 0.00399  | 0.004299 | 0.006789 | 0.052917 | 0.00401  | 0.010302 | 0.003912 | 0.013491 |
| 0.181987 | 0.10075  | 0.144721 | 0.382647 | 0.051674 | 0.257795 | 0.106659 | 0.215655 | 0.022779 | 0.133726 | 0.026326 | 0.063693 | 0.081379 | 0.102054 |
| 0.034165 | 0.009647 | 0.017602 | 0.039414 | 0.004066 | 0.021661 | 0.009292 | 0.024545 | 0.002125 | 0.013666 | 0.002218 | 0.003981 | 0.009508 | 0.007483 |
| 0.002223 | 0.00103  | 0.000801 | 0.000803 | 0.004516 | 0.001718 | 0.00281  | 0.003669 | 0.001145 | 0.00292  | 0.002818 | 0.003506 | 0.003876 | 0.002207 |
| 0.007135 | 0.079964 | 0.064475 | 0.022743 | 0.219493 | 0.077367 | 0.062911 | 0.221776 | 0.115571 | 0.031786 | 0.125481 | 0.155075 | 0.237117 | 0.155909 |
| 0.000838 | 0.007559 | 0.003212 | 0.001646 | 0.016429 | 0.003072 | 0.005052 | 0.01337  | 0.010438 | 0.002726 | 0.009438 | 0.008632 | 0.013317 | 0.013157 |
| 0.008664 | 0.007469 | 0.003481 | 0.004602 | 0.005982 | 0.019285 | 0.066005 | 0.020193 | 0.000967 | 0.002141 | 0.076188 | 0.01643  | 0.064067 | 0.002782 |
| 0.000179 | 0.003597 | 0.000263 | 0        | 0.007343 | 0.001029 | 0.014134 | 0.003349 | 0.002587 | 0.001154 | 0.00362  | 0.007086 | 0.010403 | 0.004034 |
| 0.000609 | 0.000549 | 0.004003 | 0.008914 | 0.011438 | 0.000412 | 0.035224 | 0.0358   | 0.002532 | 0.003442 | 0.02571  | 0.031642 | 0.038225 | 0.003999 |
| 0.007647 | 0.074239 | 0.111114 | 0.04088  | 0.098581 | 0.020215 | 0.246495 | 0.034109 | 0.11811  | 0.039231 | 0.119169 | 0.123698 | 0.174905 | 0.034941 |
| 0.000291 | 0.00015  | 0.001501 | 0.010363 | 0.006383 | 0.019695 | 0.031748 | 0.149702 | 0.000557 | 0.000444 | 0.093679 | 0.056079 | 0.007063 | 0.00455  |
| 0.000309 | 0.001325 | 0.001383 | 0        | 0.000281 | 0.005002 | 0.008112 | 0.011707 | 0.000733 | 0.000437 | 0.004379 | 0.006335 | 0.006469 | 0.002686 |
| 0.000911 | 0.000499 | 0.000297 | 0.00142  | 0.00063  | 0.002048 | 0.001313 | 0.007767 | 0.000512 | 0.000144 | 0.001957 | 0.004059 | 0.004794 | 0.002533 |
| 0.01769  | 0        | 0.008212 | 0.000234 | 0        | 0.000299 | 0.06441  | 5.57E-05 | 0.016294 | 0.018099 | 0.012327 | 0.070591 | 0.051796 | 0.010379 |
| 0.001288 | 0.000299 | 0.002405 | 0.000874 | 0.001167 | 0.000307 | 0.006591 | 4.46E-05 | 0.002088 | 0.000568 | 0.06821  | 0.032727 | 0        | 0.002392 |
| 0.036588 | 0.00256  | 0.131967 | 0        | 0.012023 | 0.000228 | 0.008304 | 0.003747 | 0.004761 | 0.01293  | 0.01592  | 0.012611 | 0.000812 | 0.02925  |
| 0.003557 | 0.009009 | 0.001952 | 0        | 0.00155  | 9.47E-05 | 0.002706 | 0.002647 | 0.006457 | 0.001347 | 0.004931 | 0.000703 | 0.003071 | 0.003989 |
| 0.014188 | 0.098884 | 0.021699 | 0.00889  | 0.084718 | 0.010746 | 0.005678 | 0.012211 | 0.022053 | 0.037777 | 0.027417 | 0.018151 | 0.008529 | 0.045407 |
| 0.005518 | 0.000309 | 0.002744 | 0.000147 | 0.000634 | 0.002178 | 0.000956 | 0        | 0.001587 | 0.00424  | 0.005205 | 0.001412 | 0.003052 | 0.004187 |
| 0.138343 | 0.011147 | 0.068043 | 0.004908 | 0.020229 | 0.029125 | 0.005436 | 0.000468 | 0.13335  | 0.112778 | 0.03952  | 0.026834 | 0.020168 | 0.127829 |
| 0.026692 | 0.003141 | 0.012587 | 0.001378 | 0.004655 | 0.008593 | 0.001129 | 0        | 0.002166 | 0.015744 | 0.003877 | 0.015456 | 0.004399 | 0.023209 |
| 0.095252 | 0.254148 | 0.074955 | 0.022056 | 0.217209 | 0.043119 | 0.073513 | 0.03517  | 0.301261 | 0.059498 | 0.190253 | 0.185516 | 0.139266 | 0.145634 |
| 0.070403 | 0.061019 | 0        | 0.001207 | 0.001255 | 0.000118 | 0.000429 | 0.002059 | 0.043377 | 0.021423 | 0.018757 | 0.00029  | 0.00121  | 0.030105 |
| 0.009367 | 0.028231 | 0.009149 | 0.049821 | 0.03532  | 0.016408 | 0.028038 | 0.018978 | 0.022488 | 0.012185 | 0.025161 | 0.014113 | 0.03869  | 0.020668 |
| 0.007891 | 0.024763 | 0.002666 | 0.012985 | 0.021489 | 0.000604 | 0.076051 | 0.036466 | 0.017584 | 0.006171 | 0.013471 | 0.034291 | 0.006148 | 0.006696 |
| 0        | 0.000826 | 0.00048  | 0.000313 | 0.000101 | 0        | 0.000173 | 0.004265 | 0        | 0.001304 | 0        | 0.001055 | 0.000738 | 0.001766 |
| 0.048824 | 0.007152 | 0.002405 | 0.059012 | 0.000153 | 0        | 0.007076 | 0.008486 | 0.002493 | 0.006972 | 0        | 0.004829 | 0.003238 | 0.006869 |
| 0.001329 | 0.000798 | 0        | 0.004334 | 0.000947 | 0.000653 | 0.001294 | 0.000571 | 0.001401 | 0.000229 | 0        | 0.00062  | 0.000221 | 0.000563 |
| 0.012507 | 0.000324 | 0.001717 | 0.001294 | 0.000753 | 0.001001 | 0.000487 | 0.002064 | 0        | 0.000754 | 0.000989 | 0        | 0.000279 | 0.001417 |
| 0        | 0.000514 | 0.000663 | 0.017127 | 0.000279 | 0.000753 | 0.008038 | 0.003789 | 8.24E-05 | 0.00187  | 0.001195 | 0.001002 | 0.009325 | 0.001132 |
| 0        | 5.74E-05 | 0.000395 | 0.028636 | 0.002766 | 0.001753 | 0.007974 | 0.011556 | 0.000241 | 0.005423 | 0.005777 | 0.000663 | 0.013612 | 0.000903 |
| 3.82E-05 | 0.000122 | 0.000108 | 0.013915 | 0.001178 | 0.000988 | 0.007444 | 0.001741 | 0        | 0.000521 | 0.000891 | 0.00021  | 0.002898 | 0.000661 |
| 0.000597 | 0.000145 | 0.000928 | 0.00666  | 0.000418 | 0        | 7.46E-05 | 0.000212 | 0        | 0.006087 | 0        | 0        | 0        | 0.000259 |
| 0.007115 | 0.001265 | 0.011853 | 0.069971 | 0.001262 | 0.002086 | 0.001177 | 0.001998 | 0.000241 | 0.065142 | 0.000969 | 0.000246 | 0.000443 | 0.001691 |
| 0.000714 | 0.000259 | 0.001207 | 0.011754 | 0        | 0.000225 | 9.32E-05 | 8.08E-05 | 0        | 0.00418  | 8.47E-05 | 0        | 0        | 0.000151 |
| 0.000132 | 0        | 0.000163 | 0.002204 | 0        | 9.22E-05 | 0        | 0        | 0        | 0.000189 | 0        | 0        | 0        | 0.000104 |
| 0.001197 | 5.99E-05 | 0.002126 | 0.018763 | 0.000245 | 0        | 0.000397 | 8.92E-05 | 0        | 0.001539 | 4.74E-05 | 0.000108 | 0        | 0.000186 |
| 0.000447 | 8.98E-05 | 0.000891 | 0.006222 | 0.000155 | 0        | 0        | 0        | 0        | 0.000314 | 7.11E-05 | 0        | 0        | 0.000145 |
| 0.00065  | 0.000115 | 0.001967 | 0.01283  | 9.67E-05 | 0.000184 | 0.002418 | 5.57E-05 | 0        | 0.000785 | 8.13E-05 | 8.06E-05 | 0.000266 | 0.000691 |
| 6.76E-05 | 0        | 0.001083 | 0.005142 | 0        | 0        | 0.001028 | 0        | 0        | 0.000442 | 0        | 0        | 0        | 0.000186 |
| 0.000367 | 0.000631 | 0.069654 | 0.00264  | 0.000153 | 0.006461 | 0.003867 | 0.002647 | 0.002864 | 0.016771 | 0.000623 | 0.005978 | 0.002988 | 0.006327 |
| 0.017901 | 8.48E-05 | 0.008667 | 0.00063  | 0.000349 | 0.000701 | 0.009944 | 0.006352 | 0.001438 | 0.000369 | 0.005879 | 0.003248 | 0.002606 | 0.001171 |
| 0.005809 | 0.000706 | 0.006497 | 0.009471 | 0.001199 | 0.007531 | 0.004235 | 0.001649 | 0.000425 | 0.002951 | 0.005588 | 0.001055 | 0.001752 | 0.020789 |
| 0.205742 | 0.179919 | 0.176193 | 0.092955 | 0.146175 | 0.368374 | 0.029519 | 0.087082 | 0.131696 | 0.153751 | 0.049489 | 0.066163 | 0.025993 | 0.153027 |
| 0.00752  | 0.019047 | 0.007797 | 0.004745 | 0.010141 | 9.22E-05 | 0.0452   | 0.003262 | 0.000479 | 0.137252 | 0.003346 | 0.001965 | 0.000212 | 0.000182 |

| H084     | H086     | H088     | H089     | H090     | H091     | H092     | H093     | H094     | H096     | H097     | H098     | H099     | H100     |
|----------|----------|----------|----------|----------|----------|----------|----------|----------|----------|----------|----------|----------|----------|
| 0        | 5.74E-05 | 0        | 7.87E-05 | 0.001256 | 0        | 0        | 6.20E-05 | 0.000677 | 0        | 0.001019 | 0        | 0        | 0        |
| 0        | 0        | 0        | 0        | 0        | 0        | 0        | 0        | 0.000131 | 0        | 0        | 0        | 0        | 0        |
| 2.99E-05 | 0.000203 | 5.97E-05 | 0.006718 | 0.003834 | 0.001088 | 0.000284 | 0.001122 | 0.003735 | 4.77E-05 | 0.003048 | 0.000104 | 8.33E-05 | 7.19E-05 |
| 0        | 0        | 0.000203 | 8.63E-05 | 0        | 0        | 0.000147 | 0.000618 | 0.000459 | 0        | 0.000566 | 3.27E-05 | 0        | 0        |
| 0        | 5.74E-05 | 0.001425 | 0.000569 | 0.003804 | 0        | 0.000147 | 0.001888 | 0.001275 | 4.22E-05 | 0.000774 | 0        | 0        | 8.52E-05 |
| 0        | 0.000499 | 0.001179 | 0.000757 | 0.000638 | 0        | 0.000612 | 0.001888 | 0.000668 | 0        | 0.000412 | 0        | 0        | 0        |
| 0        | 0.000351 | 0.001117 | 9.14E-05 | 0.002612 | 0        | 0.000214 | 0.002288 | 0.000589 | 0        | 0.001189 | 0        | 0        | 0        |
| 0        | 0        | 0.000392 | 0.000185 | 0        | 0        | 0.000119 | 0.000344 | 0        | 0        | 0.000692 | 0        | 0        | 0        |
| 0.000549 | 0.0004   | 0.000486 | 0        | 0        | 0.001436 | 0        | 0        | 0.000112 | 0.000879 | 0        | 0.000323 | 0.003361 | 0.000349 |
| 0        | 0        | 0        | 0        | 0        | 0        | 0        | 0        | 0        | 0        | 0        | 0        | 0        | 0        |
| 0        | 0        | 0        | 0        | 0        | 0        | 0        | 0        | 0        | 0        | 0        | 0        | 0        | 0        |
| 0        | 0        | 0        | 0        | 0        | 0        | 0        | 0        | 0        | 0        | 0        | 0        | 0        | 0        |
| 0.022187 | 0.007813 | 0.015457 | 0.002298 | 0.000827 | 0.011737 | 0.024346 | 0.004982 | 0.004033 | 0.019354 | 0.001856 | 0.000986 | 0.010473 | 0.011524 |
| 0.218662 | 0.082801 | 0.205923 | 0.027487 | 0.082349 | 0.110023 | 0.106931 | 0.118048 | 0.051632 | 0.210092 | 0.037739 | 0.159418 | 0.091412 | 0.170711 |
| 0.020616 | 0.006565 | 0.015026 | 0.002455 | 0.009725 | 0.013006 | 0.009604 | 0.008385 | 0.005181 | 0.014738 | 0.003426 | 0.017115 | 0.019822 | 0.019198 |
| 0.000514 | 0.005874 | 0.002103 | 0.005535 | 0.001608 | 0.001968 | 0.004069 | 0.001006 | 0.001193 | 0.002187 | 0.001425 | 0.003464 | 0.004692 | 0.008782 |
| 0.04133  | 0.189674 | 0.090579 | 0.066968 | 0.132612 | 0.251307 | 0.101683 | 0.212192 | 0.338719 | 0.019205 | 0.165292 | 0.088072 | 0.115699 | 0.242081 |
| 0.004246 | 0.012822 | 0.005579 | 0.003392 | 0.009456 | 0.015139 | 0.007453 | 0.011409 | 0.02321  | 0.001346 | 0.011126 | 0.007173 | 0.005919 | 0.015101 |
| 0.001292 | 0.004512 | 0.005943 | 0.002988 | 0.075215 | 0.012055 | 0.007604 | 0.001172 | 0.031425 | 0.003103 | 0.015709 | 0.038287 | 0.02794  | 0.034118 |
| 0.001061 | 0.004653 | 0.00232  | 0.001983 | 0.011317 | 0.001792 | 0.002134 | 0.001832 | 0.004835 | 0.000523 | 0.007487 | 0.002371 | 0.002401 | 0.007225 |
| 0.004676 | 0.04081  | 0.004632 | 0.024432 | 0.02923  | 0.030369 | 0.02387  | 0.00133  | 0.001142 | 0.036906 | 0.026159 | 0.000276 | 0.019689 | 0.018391 |
| 0.024332 | 0.11431  | 0.118108 | 0.102054 | 0.188066 | 0.111824 | 0.199536 | 0.061979 | 0.136609 | 0.025104 | 0.112571 | 0.081704 | 0.082949 | 0.15258  |
| 0.006749 | 0.001652 | 0.0094   | 0.00278  | 0.112587 | 0.009278 | 0.012739 | 0.010859 | 0.063212 | 0.007216 | 0.038232 | 0.152277 | 0.277756 | 0.093065 |
| 0.000656 | 0.006733 | 0.00186  | 0.006373 | 0        | 0.000277 | 0.002416 | 0.00255  | 0.006951 | 0.002122 | 0.000271 | 0.001411 | 0.003028 | 0.002553 |
| 0.000297 | 0.00144  | 0.003037 | 0.001252 | 0.000214 | 0.001878 | 0.003054 | 0.001682 | 0.006784 | 0.001493 | 0.001217 | 0.001095 | 0.003164 | 0.002643 |
| 0.006011 | 0.011607 | 0.000281 | 0.011329 | 0        | 0.003782 | 0.007189 | 0.013967 | 0.029436 | 0.037378 | 0.022067 | 0.078896 | 0.010314 | 0.004528 |
| 0.001596 | 0.010558 | 5.12E-05 | 0.018042 | 0        | 0.00036  | 0.011512 | 0.002206 | 0.001017 | 0.002611 | 0.017226 | 0.025418 | 0.008866 | 0.00271  |
| 0.013802 | 0.014023 | 0.002267 | 0.003859 | 0.000202 | 0.007175 | 0.019171 | 0.011151 | 0.002044 | 0.019113 | 0.007537 | 0.026541 | 0.004487 | 0.015567 |
| 0.002022 | 0.018888 | 0.008969 | 0.006304 | 0        | 0.0117   | 0.011939 | 0.00117  | 0.000656 | 0.003889 | 0.001233 | 0.00027  | 0.002603 | 0.000138 |
| 0.007389 | 0.020904 | 0.00814  | 0.013573 | 0.013693 | 0.049221 | 0.031452 | 0.02602  | 0.021115 | 0.02011  | 0.046053 | 0.014481 | 0.006677 | 0.012189 |
| 0.002298 | 0.002635 | 0.001077 | 0.00375  | 0        | 0.002312 | 0.002822 | 0.004342 | 0.009609 | 0.0017   | 0.001677 | 0.000496 | 0.003624 | 0.000423 |
| 0.059437 | 0.065983 | 0.018657 | 0.057556 | 0.002742 | 0.061159 | 0.036964 | 0.170735 | 0.032449 | 0.064879 | 0.082067 | 0.010028 | 0.013199 | 0.003027 |
| 0.016107 | 0.024133 | 0.00432  | 0.028975 | 0.001873 | 0.006052 | 0.006322 | 0.034163 | 0.016918 | 0.007105 | 0.015263 | 0.000976 | 0.002743 | 0.001669 |
| 0.086043 | 0.141662 | 0.050918 | 0.449428 | 0.030393 | 0.054928 | 0.15753  | 0.132665 | 0.075644 | 0.097526 | 0.173666 | 0.057404 | 0.035245 | 0.053929 |
| 0.003824 | 0.030265 | 0.024526 | 0.008224 | 0.005148 | 0.00543  | 0.0049   | 0.028698 | 0.003456 | 0.005743 | 0.000123 | 0.001577 | 0.002154 | 0.000474 |
| 0.030092 | 0.034993 | 0.082249 | 0.064304 | 0.006773 | 0.053644 | 0.04279  | 0.012295 | 0.024653 | 0.049229 | 0.0166   | 0.005331 | 0.02793  | 0.006855 |
| 0.003803 | 0.04335  | 0.03559  | 0.026116 | 0.000672 | 0.023373 | 0.025588 | 0.001372 | 0.006632 | 0.013787 | 0.014697 | 0.005851 | 0.010319 | 0.000269 |
| 0.000843 | 0.001003 | 0        | 8.89E-05 | 0        | 0.000885 | 0.001786 | 0        | 0.000501 | 0.000362 | 0        | 0        | 0.000298 | 0        |
| 0.02359  | 0.034518 | 0.134025 | 0.003242 | 0.001268 | 0        | 0.024997 | 0.001578 | 0.008196 | 0.002339 | 0.000981 | 5.51E-05 | 0        | 0        |
| 0.003875 | 0.005375 | 0.004035 | 0.000462 | 0        | 0.001883 | 0.00263  | 0.000414 | 0.000465 | 0.000145 | 0.000557 | 0.000118 | 0.000397 | 0.000189 |
| 0.000157 | 0.002392 | 0.001847 | 0.006253 | 0.002276 | 0.011403 | 0.000284 | 0.00021  | 0.001108 | 0.000165 | 0        | 0.00011  | 0.000365 | 5.32E-05 |
| 0.00066  | 0.000137 | 0.004103 | 0.00032  | 0.001419 | 0.006636 | 0.002977 | 0.00107  | 0.001209 | 0.001217 | 0.000264 | 0.000176 | 0.001371 | 7.19E-05 |
| 0.000162 | 0.000124 | 0.002779 | 0.000353 | 0.001495 | 0.02199  | 0.000539 | 0.001352 | 0.00174  | 0.000628 | 0        | 0        | 0.002131 | 0.000186 |
| 0.003013 | 0.000351 | 0.002002 | 0.000955 | 0.000857 | 0.001919 | 0.000481 | 0.000228 | 0.001184 | 0.008605 | 0.000409 | 0.000214 | 0.003834 | 0.000823 |
| 0.001107 | 0.000197 | 0.000254 | 0        | 0.000189 | 0.002314 | 0.00026  | 0        | 0.000319 | 0.001015 | 0        | 0.001172 | 0.007007 | 0.001006 |
| 0.009279 | 0.001692 | 0.003881 | 0.000587 | 0.00042  | 0.021672 | 0.001496 | 0.000398 | 0.001093 | 0.012081 | 0.000425 | 0.011542 | 0.069174 | 0.007041 |
| 0.000815 | 0.000108 | 0        | 0        | 0        | 0.00176  | 5.34E-05 | 7.60E-05 | 0        | 0.001434 | 0        | 0.001303 | 0.004774 | 0.000889 |
| 0.000176 | 0        | 0        | 0        | 0        | 0.000515 | 0        | 0        | 0        | 0.000257 | 0        | 0.000208 | 0.000393 | 0.000266 |
| 0.001552 | 0.000126 | 0.000134 | 0        | 0.000626 | 0.006974 | 0.000145 | 0.000554 | 0.000106 | 0.001695 | 0.000129 | 0.00214  | 0.005985 | 0.001903 |
| 0.000781 | 6.85E-05 | 0        | 0        | 0        | 0.003143 | 5.86E-05 | 0.000118 | 0        | 0.00054  | 0.00012  | 0.000723 | 0.001773 | 0.000804 |
| 0.001542 | 5.96E-05 | 0        | 0.000129 | 0        | 0.004907 | 0.000234 | 0.000196 | 0        | 0.001871 | 0        | 0.00123  | 0.004032 | 0.001344 |
| 0.000454 | 5.08E-05 | 6.82E-05 | 0        | 0        | 0.002424 | 0        | 0        | 0        | 0.000604 | 0        | 0.000647 | 0.001523 | 0.000607 |
| 0.012331 | 0.001095 | 0.015098 | 0.00019  | 0.001625 | 0.001772 | 0.01377  | 0.001806 | 0.002211 | 0.004111 | 0.001733 | 0.012937 | 0.026902 | 0.045474 |
| 0.002233 | 0.000872 | 0.002909 | 0.00214  | 0.032732 | 0.000939 | 0.019654 | 0.001552 | 0.009284 | 0.000406 | 0.024879 | 0.001381 | 0.012407 | 0.000122 |
| 0.004357 | 0.004759 | 0.007379 | 0.001335 | 0.020307 | 0.007268 | 0.00248  | 0.000134 | 0.008345 | 0.002143 | 0.006074 | 0.002128 | 0.008498 | 0.000902 |
| 0.111838 | 0.045682 | 0.052166 | 0.033484 | 0.155254 | 0.049283 | 0.062626 | 0.102815 | 0.057518 | 0.286794 | 0.13119  | 0.161562 | 0.047414 | 0.057788 |
| 0.241616 | 0.001164 | 0.047447 | 0.000518 | 0.054685 | 0        | 0.000388 | 0.003084 | 0.000519 | 0.006162 | 0.004822 | 0.020975 | 0.005172 | 0.000274 |

| H102     | H104     | H107     | H108     | H109     | H110     | H113     | H114     | H116     | H118     | H120     | H122     | H123     | H124     |
|----------|----------|----------|----------|----------|----------|----------|----------|----------|----------|----------|----------|----------|----------|
| 8.80E-05 | 0        | 0        | 0        | 4.50E-05 | 0        | 0        | 0.00051  | 0        | 0        | 0        | 0        | 0        | 0        |
| 0        | 0        | 0        | 0        | 0        | 0        | 0        | 9.22E-05 | 0        | 0        | 0        | 0        | 0        | 0        |
| 0.00035  | 0        | 0.000375 | 6.20E-05 | 0        | 0.000328 | 0.000201 | 0.000141 | 0.013196 | 0        | 0        | 9.90E-05 | 0.0007   | 0.000354 |
| 0        | 0        | 0        | 0        | 3.72E-05 | 0        | 0        | 0        | 0        | 0        | 0        | 3.79E-05 | 9.08E-05 | 0        |
| 0        | 4.80E-05 | 0.000326 | 4.56E-05 | 0.000855 | 0        | 0        | 0.000209 | 0.000395 | 0        | 0.000124 | 0        | 0.000236 | 3.63E-05 |
| 0.000108 | 0        | 0        | 0        | 0.000781 | 0        | 0        | 0.000193 | 7.84E-05 | 3.99E-05 | 0.000119 | 0        | 7.06E-05 | 0        |
| 9.24E-05 | 0        | 0        | 0        | 0.000763 | 0        | 0        | 0.000168 | 0.000235 | 0        | 0        | 0        | 0        | 5.36E-05 |
| 0        | 0        | 0        | 0        | 0.000155 | 0        | 0        | 0        | 0.000135 | 0        | 0        | 0        | 0        | 0        |
| 0.00015  | 0.001216 | 0.002507 | 0.000376 | 7.05E-05 | 0.000334 | 0.000199 | 0.000127 | 5.95E-05 | 0        | 0.000165 | 0.000438 | 0.000486 | 0.000432 |
| 0        | 0        | 0        | 0        | 0        | 0        | 0        | 0        | 0        | 0        | 0        | 0        | 0        | 0        |
| 0        | 0        | 0        | 0        | 0        | 0        | 0        | 0        | 0        | 0        | 0        | 0        | 0        | 0        |
| 0        | 0        | 0        | 0        | 0        | 0        | 0        | 0        | 0        | 0        | 0        | 0        | 0        | 0        |
| 0.011145 | 0.108412 | 0.041055 | 0.01932  | 0.024941 | 0.051352 | 0.042795 | 0.006632 | 0.008426 | 0.015939 | 0.005953 | 0.013589 | 0.008538 | 0.021028 |
| 0.082259 | 0.115437 | 0.106732 | 0.193816 | 0.129574 | 0.184018 | 0.150168 | 0.050837 | 0.020561 | 0.089458 | 0.086764 | 0.223122 | 0.067964 | 0.224209 |
| 0.004751 | 0.023823 | 0.019636 | 0.012517 | 0.010989 | 0.016789 | 0.016675 | 0.012059 | 0.00133  | 0.007785 | 0.007742 | 0.013484 | 0.008755 | 0.018124 |
| 0.003512 | 0.001486 | 0.000492 | 0.003533 | 0.001454 | 0.000859 | 0.003681 | 0.004454 | 0.005154 | 0.002505 | 0.000722 | 0.001556 | 0.000541 | 0.002554 |
| 0.031628 | 0.06522  | 0.073782 | 0.074306 | 0.112465 | 0.034308 | 0.098501 | 0.117772 | 0.262446 | 0.040845 | 0.131287 | 0.06573  | 0.036097 | 0.080407 |
| 0.001384 | 0.006561 | 0.006387 | 0.007483 | 0.00923  | 0.002307 | 0.007137 | 0.008039 | 0.020898 | 0.002898 | 0.009031 | 0.004034 | 0.00429  | 0.006412 |
| 0.004656 | 0.002501 | 0.013335 | 0.011489 | 0.000675 | 0.006876 | 0.008963 | 0.030633 | 0.002965 | 0.007224 | 0.004484 | 0.003138 | 0.012067 | 0.011234 |
| 0.001285 | 0.001341 | 0.000729 | 0.004069 | 0.002239 | 0.001694 | 0.001338 | 0.002352 | 0.011994 | 0.002133 | 0.000402 | 0.001227 | 0.002469 | 0.003191 |
| 0.028694 | 0.006038 | 0.001573 | 0.031648 | 0.023452 | 0.012327 | 0.002683 | 0.004527 | 0.042737 | 0.007298 | 0.001378 | 0.014531 | 0.025272 | 0.022705 |
| 0.083513 | 0.14838  | 0.08068  | 0.147003 | 0.152904 | 0.041944 | 0.1976   | 0.034598 | 0.102333 | 0.147976 | 0.093202 | 0.03244  | 0.127426 | 0.159989 |
| 0.000537 | 0.002567 | 0.002304 | 0.005516 | 0.001712 | 0.006288 | 0.022345 | 0.087676 | 0.077724 | 0.011837 | 0.018056 | 0.006202 | 0.01929  | 0.033186 |
| 0.003633 | 0.000306 | 0.000457 | 0.000361 | 0.001325 | 0.002295 | 0.003671 | 0.003418 | 0.013623 | 0.004314 | 0.001265 | 0.003312 | 0.001446 | 0.005499 |
| 0.005151 | 0.001068 | 0.005242 | 0.001991 | 0.000679 | 0.002185 | 0.002297 | 0.003458 | 0.008472 | 0.001578 | 0.000425 | 0.001757 | 0.000387 | 0.001746 |
| 0.016669 | 0.009259 | 0.002901 | 0.013335 | 0.025667 | 0.009254 | 0.03321  | 0.000217 | 0.002616 | 0.040223 | 0.001202 | 0.003695 | 0.040001 | 0.002837 |
| 0.00248  | 0.003368 | 0        | 0.007582 | 0.004715 | 0.003826 | 0.006706 | 0.000274 | 0.002748 | 0.005229 | 3.84E-05 | 0.002153 | 0.005377 | 0.001523 |
| 0.106904 | 0.004986 | 0.01567  | 0.039056 | 0.049158 | 0.038479 | 0.030088 | 0.004852 | 0.005064 | 0.001208 | 0.003167 | 0.008654 | 0.013021 | 0.03177  |
| 0.010355 | 0.003407 | 0.002454 | 0.002328 | 0.006433 | 0.007444 | 0.003917 | 0.000247 | 0.000976 | 0.002166 | 0.001211 | 0.001819 | 0.003273 | 0.001626 |
| 0.020839 | 0.010555 | 0.06691  | 0.052277 | 0.041856 | 0.045543 | 0.040254 | 0.144939 | 0.007213 | 0.127744 | 0.018546 | 0.005045 | 0.02531  | 0.033471 |
| 0.006921 | 0.002038 | 0.001473 | 0.003994 | 0.005877 | 0.01475  | 0.010815 | 0.003171 | 0.001494 | 0.003646 | 0.000733 | 0.005116 | 0.001069 | 0.005044 |
| 0.096218 | 0.059437 | 0.109827 | 0.069018 | 0.08718  | 0.102145 | 0.103223 | 0.037042 | 0.032749 | 0.16239  | 0.010837 | 0.012226 | 0.029751 | 0.043712 |
| 0.011205 | 0.01718  | 0.014738 | 0.024476 | 0.02846  | 0.016192 | 0.01062  | 0.002143 | 0.012196 | 0.025178 | 0.002431 | 0.001826 | 0.006192 | 0.007146 |
| 0.279187 | 0.075794 | 0.067662 | 0.058557 | 0.127095 | 0.174744 | 0.06141  | 0.209424 | 0.249193 | 0.135398 | 0.029943 | 0.068477 | 0.104103 | 0.056381 |
| 0.010459 | 0.00169  | 0.001299 | 0.000749 | 0.021052 | 0.000239 | 0.000455 | 0.000296 | 0.000143 | 0.002727 | 0.001321 | 0.005961 | 0.013963 | 0.0026   |
| 0.0171   | 0.011884 | 0.017147 | 0.009667 | 0.01466  | 0.020183 | 0.014295 | 0.019957 | 0.019647 | 0.015479 | 0.01343  | 0.017911 | 0.01427  | 0.01983  |
| 0.015821 | 0.002224 | 0.000545 | 0.009091 | 0.011658 | 0.002961 | 0.003551 | 0.001513 | 0.031568 | 0.015275 | 0.004368 | 0.004873 | 0.013703 | 0.005023 |
| 0.000112 | 0        | 0        | 0.00076  | 0.000211 | 0.000351 | 0        | 0        | 0.000127 | 0        | 0.003107 | 3.79E-05 | 4.84E-05 | 0.001515 |
| 0.00024  | 0.004613 | 0.00236  | 0        | 0        | 0.005593 | 0.000565 | 0        | 0.000378 | 0        | 0.000274 | 0.004378 | 0.006579 | 0.009023 |
| 0.000618 | 0.000876 | 0.001655 | 0.000383 | 0.000523 | 0.000487 | 0.000344 | 0.000567 | 0        | 0.000721 | 0.00028  | 0.00015  | 3.43E-05 | 0.000809 |
| 0.000849 | 0.000508 | 0.00254  | 0.001072 | 0.002147 | 0.012366 | 0.005911 | 0.001435 | 0.000327 | 0.002077 | 0.000406 | 0.00161  | 0.00025  | 0.001106 |
| 0.000165 | 0.001158 | 0.005023 | 0.000798 | 0.000767 | 0.003857 | 0.001846 | 0.006775 | 0.002119 | 0.000192 | 0.001405 | 0.000866 | 0.000288 | 0.000991 |
| 7.92E-05 | 0.000666 | 0.010111 | 0.000461 | 0.000454 | 0.001925 | 0.001053 | 0.000252 | 0.001684 | 0.00026  | 0.002185 | 0.000689 | 0.000159 | 0.002877 |
| 8.36E-05 | 0.000337 | 0.010101 | 0.000474 | 0.000777 | 0.000892 | 0.000547 | 0.000464 | 0.000397 | 0.000593 | 0.000425 | 0.001021 | 0.000141 | 0.003617 |
| 0.000152 | 0.007233 | 0.005041 | 0.000427 | 0.000186 | 0.00096  | 0.000506 | 0.000168 | 0.000116 | 0.000267 | 0.000281 | 0.000699 | 0.000805 | 0.000415 |
| 0.001888 | 0.053282 | 0.060642 | 0.005254 | 0.001433 | 0.007103 | 0.00879  | 0.00217  | 0.00077  | 0.00277  | 0.006689 | 0.010591 | 0.0114   | 0.0051   |
| 0.000253 | 0.005121 | 0.010261 | 0.00045  | 7.63E-05 | 0.001154 | 0.003181 | 0.000157 | 0        | 0.000748 | 0.001296 | 0.001386 | 0.001257 | 0.001119 |
| 0        | 0.001351 | 0.004632 | 0.000155 | 8.02E-05 | 0.000268 | 0.000557 | 8.14E-05 | 0        | 0.001117 | 0.000278 | 0.000121 | 0.000377 | 0.00014  |
| 0.000244 | 0.009772 | 0.025407 | 0.00058  | 2.94E-05 | 0.002918 | 0.006243 | 3.25E-05 | 0.00027  | 0.009447 | 0.002273 | 0.001035 | 0.003413 | 0.002248 |
| 7.92E-05 | 0.00287  | 0.005906 | 0.000385 | 4.89E-05 | 0.000945 | 0.002049 | 0        | 0.000108 | 0.00358  | 0.000527 | 0.000208 | 0.001222 | 0.000639 |
| 0        | 0.006783 | 0.020433 | 0.000709 | 0.000145 | 0.001738 | 0.004116 | 0.000152 | 0.000359 | 0.005648 | 0.001492 | 0.000578 | 0.00168  | 0.001626 |
| 0        | 0.003008 | 0.008282 | 0.000129 | 0        | 0.000761 | 0.00201  | 0.000198 | 3.51E-05 | 0.002449 | 0.000746 | 0.000265 | 0.000801 | 0.000576 |
| 0.007506 | 0.001075 | 0.000207 | 0.003757 | 0.00109  | 0.017664 | 0.005981 | 5.70E-05 | 0.000203 | 0.006876 | 0.001972 | 0.032075 | 0.027956 | 0.016217 |
| 0.011839 | 0.000724 | 0.000928 | 0.017198 | 0.001611 | 0.015208 | 0.022091 | 0.001359 | 0.001203 | 0.000714 | 0.00026  | 0.002794 | 0.012063 | 0.029821 |
| 0.001668 | 0.000774 | 0.004472 | 0.002313 | 0.002855 | 0.004354 | 0.009379 | 0.004424 | 0.000303 | 0.009589 | 0.010753 | 0.016923 | 0.00215  | 0.014017 |
| 0.112341 | 0.10146  | 0.159216 | 0.152054 | 0.079581 | 0.112433 | 0.046277 | 0.15019  | 0.033189 | 0.073231 | 0.186571 | 0.395541 | 0.135335 | 0.09933  |
| 0.004788 | 0.112159 | 0.006543 | 0.008973 | 0.009828 | 0.009359 | 0.001752 | 0.039548 | 4.05E-05 | 0.001229 | 0.33043  | 0.006578 | 0.207883 | 0.006691 |

| H125     | H126     | H127     | H130     | H131     | H133     | H137     | H139      | H141     | H142     | H146     | H147     | H149     | H150     |
|----------|----------|----------|----------|----------|----------|----------|-----------|----------|----------|----------|----------|----------|----------|
| 0        | 0        | 8.40E-05 | 0.000341 | 0        | 0        | 6.41E-05 | 6.05E-05  | 6.26E-05 | 0.000538 | 0        | 0.000228 | 0.000302 | 0.000878 |
| 0        | 0        | 0        | 0        | 0        | 0        | 0        | 0         | 0        | 0        | 0        | 0        | 6.87E-05 | 0.000289 |
| 0.00151  | 0        | 0        | 0.002259 | 0        | 5.20E-05 | 0.000779 | 3.55E-05  | 0.000865 | 0.003749 | 0        | 0.000433 | 0.000241 | 0.000753 |
| 0        | 0        | 0        | 0.00194  | 0        | 0        | 0.000274 | 3.34E-05  | 0.00016  | 0.000469 | 0        | 0        | 0.000231 | 0.000259 |
| 0        | 0.000159 | 0.000446 | 0.009007 | 0.000362 | 0.000473 | 0.000222 | 0.003211  | 0.003664 | 0.004902 | 0.00022  | 0.000174 | 0.001365 | 0.002607 |
| 0.000509 | 5.48E-05 | 8.62E-05 | 0.002263 | 0        | 0        | 0.000434 | 0.003199  | 0.001401 | 0.003665 | 0        | 0.000833 | 0.00082  | 0.001088 |
| 0        | 0        | 0.000424 | 0.000552 | 0        | 0        | 0.000809 | 2.92E-05  | 0.000152 | 0.000196 | 0        | 0.000811 | 0.001924 | 0.000731 |
| 0        | 0        | 0.00011  | 0        | 0        | 0        | 0.000123 | 0.000236  | 0.000348 | 5.60E-05 | 0        | 0.000747 | 0.000323 | 9.27E-05 |
| 0        | 0.000332 | 6.03E-05 | 0        | 0.000733 | 0.000102 | 0        | 0.000641  | 0.000498 | 0.000454 | 0        | 0        | 0.00033  | 0        |
| 0        | 0        | 0        | 0        | 0        | 0        | 0        | 0         | 0        | 0        | 0        | 0        | 0        | 0        |
| 0        | 0        | 0        | 0        | 0        | 0        | 0        | 0         | 0        | 0        | 0        | 0        | 0        | 0        |
| 0        | 0        | 0        | 0        | 0        | 0        | 0        | 0         | 0        | 0        | 0        | 0        | 0        | 0        |
| 0.00027  | 0.009653 | 0.013895 | 0.013619 | 0.013117 | 0.035607 | 0.010142 | 0.03296   | 0.008933 | 0.031076 | 0.000709 | 0.005461 | 0.014808 | 0.006465 |
| 0.016257 | 0.122094 | 0.075613 | 0.181873 | 0.189678 | 0.329143 | 0.080133 | 0.271096  | 0.136918 | 0.153722 | 0.028163 | 0.06443  | 0.296166 | 0.140578 |
| 0.001776 | 0.011911 | 0.007864 | 0.037457 | 0.015534 | 0.036825 | 0.007237 | 0.053813  | 0.027984 | 0.022565 | 0.002658 | 0.005332 | 0.04593  | 0.014681 |
| 0.001755 | 0.009058 | 0.006395 | 0.001666 | 0.002599 | 0.001397 | 0.003991 | 0.001953  | 0.005068 | 0.001828 | 0.001416 | 0.003672 | 0.000868 | 0.002759 |
| 0.040676 | 0.20452  | 0.128956 | 0.279588 | 0.107596 | 0.03501  | 0.096079 | 0.171019  | 0.215592 | 0.156775 | 0.037272 | 0.095535 | 0.038346 | 0.200845 |
| 0.002309 | 0.022134 | 0.008952 | 0.016825 | 0.005304 | 0.002671 | 0.005646 | 0.015012  | 0.014471 | 0.010498 | 0.002926 | 0.00844  | 0.002776 | 0.01533  |
| 0.007391 | 0.005631 | 0.025591 | 0.011818 | 0.007996 | 0.002582 | 0.005207 | 0.006433  | 0.008987 | 0.005462 | 0.012815 | 0.001844 | 0.001214 | 0.015292 |
| 0.000523 | 0.002514 | 0.005833 | 0.000516 | 0.00243  | 0.001217 | 0.003917 | 0.002326  | 0.004646 | 0.002568 | 0.003325 | 0.003058 | 0.000144 | 0.002792 |
| 0.006872 | 0.007847 | 0.006718 | 0.011347 | 0.030454 | 0.00105  | 0.005281 | 3.55E-05  | 0.004086 | 0.0011   | 0.00149  | 0.028435 | 0.001026 | 0.005025 |
| 0.048231 | 0.106813 | 0.101554 | 0.020749 | 0.045485 | 0.043322 | 0.002891 | 0.059323  | 0.072686 | 0.135531 | 0.011946 | 0.065777 | 0.014343 | 0.144742 |
| 0.000458 | 0.016475 | 0.012465 | 0.161618 | 0.061144 | 3.71E-05 | 0.029157 | 0.000463  | 0.004151 | 0.000706 | 0.000796 | 0.001292 | 0.001143 | 0.021127 |
| 0.007742 | 0.006234 | 0.003931 | 0.002016 | 0.00718  | 0.000356 | 0.002282 | 0.003724  | 0.002054 | 0.01466  | 0.002549 | 0.003805 | 0.001448 | 0.003365 |
| 0.005724 | 0.001534 | 0.006727 | 0.000647 | 0.005272 | 0.002849 | 0.002225 | 0.001258  | 0.003302 | 0.004514 | 0.006352 | 0.005214 | 0.000605 | 0.009634 |
| 0.000748 | 0.016186 | 0.010664 | 0.000148 | 0.019974 | 0.012438 | 0.008934 | 0.000307  | 0.000272 | 0        | 0.031219 | 0.006137 | 0.00347  | 0.014264 |
| 0        | 0.004203 | 0.019605 | 0        | 0.024843 | 0.017882 | 0.011832 | 0         | 0.000258 | 0        | 0.016832 | 0.003493 | 0.000247 | 0.006683 |
| 0.000724 | 0.012201 | 0.057091 | 0.003781 | 0.000976 | 0.007444 | 0.043914 | 0         | 0.002677 | 0        | 0.002124 | 0.00967  | 0.00219  | 0.001194 |
| 0.000266 | 0.010741 | 0.011114 | 0.004706 | 0.008082 | 0.003723 | 0.00608  | 0.000173  | 0.000903 | 0.001041 | 7.91E-05 | 0.00533  | 0.003111 | 0.000725 |
| 0.001482 | 0.012761 | 0.072918 | 0.014597 | 0.01716  | 0.078961 | 0.010256 | 0.014318  | 0.086629 | 0.013594 | 0.205312 | 0.013915 | 0.002428 | 0.047113 |
| 0        | 0.002478 | 0.001958 | 0.006946 | 0.00273  | 0.011024 | 0.008633 | 0.000286  | 0.004401 | 0.003438 | 0.00393  | 0.002567 | 0.002265 | 0.001153 |
| 0.003449 | 0.053748 | 0.065978 | 0.011912 | 0.057828 | 0.12421  | 0.101585 | 0.019173  | 0.112587 | 0.068401 | 0.245315 | 0.11169  | 0.085274 | 0.089061 |
| 0.001281 | 0.010292 | 0.018543 | 0.001845 | 0.022295 | 0.032055 | 0.053406 | 0.003691  | 0.011637 | 0.019652 | 0.032274 | 0.014834 | 0.00304  | 0.00914  |
| 0.013203 | 0.109366 | 0.180301 | 0.022208 | 0.055338 | 0.084492 | 0.251738 | 0.0011334 | 0.087024 | 0.127995 | 0.2633   | 0.277644 | 0.082024 | 0.105059 |
| 0.000533 | 0.007409 | 0.017022 | 0.001931 | 0.000314 | 0.015079 | 0.045863 | 0.001317  | 0.004953 | 0.003022 | 0.005532 | 0.056123 | 0.04489  | 0.053982 |
| 0.001957 | 0.042961 | 0.012783 | 0.036765 | 0.06102  | 0.018154 | 0.023107 | 0.024977  | 0.021802 | 0.040542 | 0.021894 | 0.03225  | 0.041683 | 0.011158 |
| 0.0011   | 0.046222 | 0.008532 | 0.017152 | 0.020275 | 0.014701 | 0.018344 | 0.006746  | 0.003544 | 0.004921 | 0.040519 | 0.047279 | 0.018123 | 0.001284 |
| 0        | 0.019338 | 0        | 0.001235 | 0.000378 | 6.68E-05 | 0.00059  | 0.000561  | 0.000381 | 0.000152 | 0        | 0.000921 | 0.000719 | 0        |
| 0        | 0.029275 | 0.002055 | 0.005402 | 7.68E-05 | 0.000132 | 0.004001 | 0.01265   | 0        | 0.001346 | 0        | 0.008335 | 0        | 0.000578 |
| 0        | 0.001891 | 0.000166 | 0.000382 | 0.002045 | 0.001193 | 0.000683 | 0.001498  | 0.000112 | 0        | 0        | 0.000107 | 0.005481 | 6.54E-05 |
| 0        | 0.000948 | 9.26E-05 | 0.004593 | 0.011933 | 0.003393 | 0.000402 | 3.96E-05  | 0.027225 | 0.00157  | 0.000116 | 0.000528 | 0.001677 | 8.45E-05 |
| 0        | 0.00357  | 0.000286 | 0.0085   | 0.009917 | 0.001754 | 0.000345 | 0.000309  | 0.002587 | 0.002506 | 0.000102 | 0.00207  | 0.000637 | 0.000444 |
| 0.000546 | 0.008569 | 0.00089  | 0.016735 | 0.080254 | 7.05E-05 | 0.000696 | 0         | 0.002187 | 0.000224 | 0        | 0.000909 | 0.000616 | 0.000327 |
| 0        | 0.001099 | 0.000536 | 0.00269  | 0.005057 | 0.000388 | 0.000301 | 0         | 0.000696 | 0.000174 | 0        | 0.000814 | 5.73E-05 | 9.00E-05 |
| 0.000242 | 0.000402 | 0.000439 | 0.000355 | 0.001204 | 0.000906 | 5.67E-05 | 0.000981  | 0.000547 | 0.000538 | 0        | 0        | 0.000268 | 8.73E-05 |
| 0.018859 | 0.00355  | 0.001475 | 0.001747 | 0.018412 | 0.004625 | 0.000925 | 0.005709  | 0.004809 | 0.006024 | 0.00031  | 0.000402 | 0.003211 | 0.000548 |
| 0        | 0.000304 | 0.000487 | 0        | 0.002087 | 0.000217 | 7.65E-05 | 0.000357  | 0.00022  | 0        | 0        | 0        | 0.000241 | 0.000164 |
| 0.044631 | 0        | 9.26E-05 | 0        | 0.000493 | 0.00041  | 0        | 0         | 0        | 0        | 0.000486 | 0        | 0        | 0        |
| 0.307897 | 0.000595 | 7.54E-05 | 0.000355 | 0.003838 | 0.003925 | 0        | 5.63E-05  | 0.000106 | 0.001107 | 0.003169 | 0        | 7.10E-05 | 6.82E-05 |
| 0.105785 | 0.000168 | 7.32E-05 | 0        | 0.000759 | 0.00226  | 5.43E-05 | 0         | 3.54E-05 | 0.000298 | 0.000933 | 0        | 0        | 0        |
| 0.220685 | 0.000463 | 0.000198 | 0        | 0.002545 | 0.003335 | 0        | 7.72E-05  | 0        | 0.000159 | 0.002872 | 0.000121 | 7.33E-05 | 0        |
| 0.12199  | 4.53E-05 | 0.000187 | 0        | 0.001018 | 0.001852 | 0        | 0         | 0        | 5.91E-05 | 0.001303 | 0.000112 | 0        | 0        |
| 0        | 0.014038 | 0.002031 | 0.002892 | 0.003057 | 0.00283  | 0.014368 | 0.004951  | 0.002443 | 0.000146 | 4.04E-05 | 0.000745 | 0.003967 | 0.000346 |
| 0.000437 | 0.007337 | 0.018058 | 0.029999 | 0.015016 | 0.003983 | 0.01436  | 0         | 0.000264 | 0.003308 | 0.001259 | 0.00099  | 0.006095 | 0.000237 |
| 0.000249 | 0.004347 | 0.00159  | 0.003592 | 7.36E-05 | 0.006542 | 0.006156 | 0.000478  | 0.002233 | 0.007231 | 7.42E-05 | 0.005935 | 0.010369 | 0.00075  |
| 0.011933 | 0.045955 | 0.08828  | 0.040775 | 0.05496  | 0.043879 | 0.101752 | 0.251087  | 0.099612 | 0.130613 | 0.008339 | 0.093891 | 0.209107 | 0.066061 |
| 0        | 0.002573 | 0.000773 | 0.002658 | 0.001159 | 0.005378 | 0.014651 | 0.012064  | 0.003827 | 0.006907 | 3.23E-05 | 0.007667 | 0.044244 | 0        |



| CC01     | CC02     | CC05     | CC06     | CC08     | CC09     | CC12     | CC16     | CC17     | CC20     | CC21     | CC24     | CC25     | CC26     |
|----------|----------|----------|----------|----------|----------|----------|----------|----------|----------|----------|----------|----------|----------|
| 0.008117 | 0.002123 | 0        | 0.000219 | 0.02026  | 0        | 2.44E-05 | 0        | 0        | 0.011635 | 0        | 0.000915 | 0.054964 | 0        |
| 0.002869 | 0        | 0.000114 | 0.000423 | 0.003588 | 0        | 0        | 0        | 0        | 0.003909 | 0        | 0.000533 | 0.005057 | 6.76E-05 |
| 0        | 0        | 0        | 0.000241 | 0.61148  | 0.155265 | 0.000789 | 0.000203 | 0.015843 | 0        | 0.000168 | 0.021456 | 0.024816 | 0.002205 |
| 0        | 0        | 0        | 0.000139 | 0.037037 | 0.002043 | 0.001223 | 0        | 0.000194 | 0        | 0        | 0.001376 | 0.003995 | 0.002481 |
| 0.011138 | 0.001455 | 0.002652 | 0.00754  | 0.035032 | 0.004999 | 0.00197  | 0        | 0.008058 | 0.000753 | 2.99E-05 | 0.004564 | 0.026744 | 0.018558 |
| 0.011458 | 0.00083  | 0.000997 | 0.004522 | 0.003271 | 0.001415 | 0        | 3.30E-05 | 0.000537 | 0.000631 | 0        | 0.003885 | 0.036547 | 0.027223 |
| 0.002926 | 0        | 0        | 0        | 0        | 0        | 0.000362 | 0        | 0        | 0        | 0        | 0.000573 | 0.052139 | 0.001777 |
| 0        | 0        | 0.000179 | 0        | 0        | 0.001092 | 0        | 0        | 0        | 0.000407 | 0        | 0.001661 | 0.016705 | 0.001998 |
| 0.002888 | 0.017023 | 0.000192 | 0        | 0.002532 | 0.014403 | 0.000324 | 0.04923  | 0.089032 | 0.201545 | 0.118692 | 0.000395 | 0.001673 | 0.000566 |
| 0        | 0.000842 | 0        | 0        | 0        | 0.001082 | 0        | 0.001415 | 0.004386 | 0.016073 | 0.003251 | 7.55E-05 | 0        | 4.16E-05 |
| 0        | 0.002005 | 0        | 0        | 0        | 0.002415 | 5.51E-05 | 0.0026   | 0.004077 | 0.026751 | 0.007472 | 7.77E-05 | 0        | 0        |
| 0.002643 | 0.000613 | 0        | 0        | 0        | 0.000584 | 0        | 0.001868 | 0.003161 | 0.016398 | 0.005269 | 8.21E-05 | 0        | 5.33E-05 |
| 0        | 9.44E-05 | 0.001295 | 0.014513 | 0.015617 | 0.027053 | 0        | 0.186924 | 0.026762 | 0.000234 | 0.103898 | 0.002697 | 0.021248 | 0.072156 |
| 0.039151 | 0.110005 | 0.062055 | 0.259856 | 0.016039 | 0.095798 | 0.870741 | 0.569599 | 0.134596 | 0.260462 | 0.328249 | 0.064247 | 0.290698 | 0.790654 |
| 0.011251 | 0.010829 | 0.004935 | 0.193836 | 0.003799 | 0.011259 | 0.043375 | 0.123581 | 0.020633 | 0.086278 | 0.044608 | 0.007037 | 0.015509 | 0.049361 |
| 0.002794 | 0.003213 | 0        | 0.000551 | 0.003377 | 0.000782 | 0        | 0        | 0.011633 | 0.010719 | 0.003807 | 0.003219 | 0.003295 | 4.81E-05 |
| 0.757088 | 0.599498 | 0.815193 | 0.453398 | 0.177377 | 0.181372 | 0.000131 | 0.011084 | 0.104302 | 0.215114 | 0.008138 | 0.648358 | 0.150553 | 0.003783 |
| 0.056046 | 0.061697 | 0.040395 | 0.041216 | 0.013717 | 0.015253 | 0        | 0.000295 | 0.012188 | 0.017681 | 0.001028 | 0.053311 | 0.009014 | 0.000137 |
| 0.030921 | 0.004652 | 0.011616 | 0.001541 | 0.015195 | 0.000546 | 0        | 0.001448 | 0.102928 | 0.0051   | 0.001185 | 0.037232 | 0.00437  | 0.000363 |
| 0        | 0.001313 | 0.006071 | 0.00054  | 0        | 0.001024 | 0        | 2.93E-05 | 0.006887 | 0.012887 | 0.000307 | 0.003397 | 0.001527 | 4.42E-05 |
| 0        | 0.016303 | 0.00996  | 0.000883 | 0        | 0        | 6.03E-05 | 7.51E-05 | 0.004465 | 0.000519 | 0        | 0.00099  | 0.001616 | 5.46E-05 |
| 0        | 0.043558 | 0.008035 | 0.011516 | 0        | 0.003985 | 0        | 0.000597 | 0.000784 | 0.004764 | 0.000943 | 0.008616 | 0.001699 | 0.000202 |
| 0        | 0.00059  | 0        | 0.001573 | 0        | 0        | 0        | 4.76E-05 | 0.000537 | 0        | 0        | 4.66E-05 | 0        | 0        |
| 0        | 0.000362 | 0        | 0.002408 | 0        | 0        | 0        | 0.000104 | 0.003901 | 0        | 0.000762 | 0.002955 | 0        | 0        |
| 0        | 0        | 0        | 0.000583 | 0        | 0.010848 | 0        | 0.000388 | 0.024799 | 0.000163 | 0.000584 | 0.001652 | 0        | 0        |
| 0        | 0        | 0        | 5.35E-05 | 0        | 0        | 0        | 0        | 0        | 0        | 0.000897 | 0.001641 | 0.001718 | 0        |
| 0        | 0        | 0.022014 | 0        | 0        | 0.00013  | 0        | 0        | 0        | 0        | 0.000143 | 3.77E-05 | 0        | 0.0001   |
| 0        | 0        | 0        | 0        | 0        | 0        | 0        | 0.00041  | 0        | 0.000855 | 0.001738 | 0.000335 | 0.000821 | 0        |
| 0        | 0.000354 | 0        | 0        | 0        | 0        | 2.82E-05 | 0.006042 | 0.000159 | 0.008286 | 0        | 5.77E-05 | 0.00084  | 0        |
| 0.008268 | 0.00129  | 0.000838 | 0        | 0.01129  | 0.002135 | 0        | 0.000628 | 0.010118 | 0.040859 | 0.004459 | 0.001518 | 0.008168 | 0.000122 |
| 0        | 0        | 0        | 0        | 0.003693 | 0.000324 | 0        | 2.56E-05 | 0        | 0.000611 | 0.005271 | 0        | 0.000808 | 0        |
| 0.013875 | 7.47E-05 | 0.002263 | 0.000161 | 0.003588 | 0.010148 | 0.000122 | 0.000936 | 0.001383 | 0.00909  | 0.107924 | 0.000182 | 0.004765 | 0.000118 |
| 0        | 6.29E-05 | 0.000117 | 0        | 0        | 0.001521 | 0        | 0.00013  | 0        | 0.001333 | 0.011709 | 8.66E-05 | 0.000827 | 0        |
| 0.016536 | 0.109392 | 0.000237 | 0.000102 | 0.00306  | 0.411449 | 2.18E-05 | 0.011317 | 0.010902 | 0.033224 | 0.072802 | 0.102238 | 0.157824 | 0.004253 |
| 0.005531 | 0        | 5.84E-05 | 0        | 0.006437 | 0.00184  | 0        | 0        | 0        | 0.000132 | 0.006538 | 0.002715 | 0.060906 | 5.46E-05 |
| 0        | 0.010271 | 0.000354 | 0        | 0.007492 | 0.027628 | 0        | 0.002219 | 0.036625 | 0.003237 | 0.006973 | 0.012197 | 0.013836 | 0.000239 |
| 0        | 8.65E-05 | 0.007739 | 0        | 0        | 0.004656 | 2.95E-05 | 0.002474 | 0.004993 | 0.000407 | 0        | 0.005295 | 0.006616 | 0.000107 |
| 0        | 0        | 0        | 0        | 0        | 0        | 0        | 0        | 0        | 0.000489 | 0        | 0        | 0        | 0        |
| 0        | 7.08E-05 | 0        | 0        | 0        | 0        | 0        | 0.000606 | 0        | 0        | 0        | 4.00E-05 | 0        | 0        |
| 0        | 0        | 0        | 0        | 0        | 0        | 0        | 5.26E-05 | 0        | 0        | 0.000224 | 0        | 0        | 0        |
| 0        | 0        | 0        | 0        | 0        | 0        | 0        | 0.003266 | 0        | 0        | 0.000226 | 0.000238 | 0        | 0        |
| 0        | 0.000425 | 0        | 0.00099  | 0        | 0.000169 | 0        | 0.007351 | 0.003954 | 0.001944 | 0        | 6.88E-05 | 0        | 0        |
| 0        | 0        | 0.000107 | 0.002986 | 0        | 0.000184 | 0        | 0.000231 | 0.02361  | 0        | 0        | 0        | 0        | 0        |
| 0        | 0        | 9.09E-05 | 0        | 0        | 0        | 0        | 2.01E-05 | 0.001022 | 0        | 0        | 0        | 0        | 0        |
| 0        | 0        | 0        | 0.000123 | 0.002849 | 0        | 0.000181 | 5.31E-05 | 0        | 0        | 0        | 0        | 0        | 0        |
| 0        | 0        | 0        | 0        | 0        | 0        | 0        | 0        | 0        | 0.001252 | 7.47E-05 | 0        | 0        | 0        |
| 0        | 0        | 0        | 0        | 0        | 0        | 2.95E-05 | 4.58E-05 | 0.000123 | 0        | 0.000143 | 0        | 0        | 0        |
| 0        | 0        | 0        | 0        | 0        | 0        | 0        | 0        | 0.002122 | 0        | 0        | 0        | 0        | 0        |
| 0        | 0.000185 | 0        | 0        | 0        | 0        | 0        | 0.002029 | 0.129814 | 0.001171 | 4.81E-05 | 0        | 0        | 0        |
| 0        | 0        | 0        | 0        | 0        | 0        | 0        | 0.000458 | 0.027775 | 0.000417 | 0        | 4.88E-05 | 0        | 0        |
| 0        | 0.000488 | 0        | 0        | 0        | 0        | 0        | 0.001703 | 0.124354 | 0.002463 | 3.98E-05 | 0        | 0        | 0        |
| 0        | 0        | 0        | 0        | 0        | 0        | 0        | 0.000386 | 0.018185 | 0.000753 | 0        | 0        | 0        | 0        |
| 0        | 0        | 0        | 0        | 0        | 0        | 0        | 0        | 0        | 0        | 0.000772 | 0        | 0        | 0.000203 |
| 0        | 0        | 0        | 0        | 0        | 0        | 0        | 2.75E-05 | 0        | 0        | 0.00012  | 0.000124 | 0        | 0.000186 |
| 0        | 0        | 0        | 0        | 0        | 0        | 0        | 0        | 0        | 0        | 0.009691 | 0.000284 | 0        | 0        |
| 0.016499 | 0.000295 | 0.002496 | 8.56E-05 | 0.003271 | 0.008438 | 0.080481 | 0.010103 | 0.02516  | 0.001232 | 0.114679 | 0.003505 | 0.020701 | 0.022847 |
| 0        | 0        | 0        | 0        | 0        | 0.000159 | 0        | 1.83E-05 | 0        | 0        | 0.027363 | 3.77E-05 | 0        | 0        |

| CC27     | CC28     | CC29     | CC30     | CC31     | CC33     | CC34     | CC35     | CC36     | CC37     | CC39     | CC42     | CC43     | CC44     |
|----------|----------|----------|----------|----------|----------|----------|----------|----------|----------|----------|----------|----------|----------|
| 0        | 0.010422 | 0.014826 | 0.005188 | 0.005367 | 0.003615 | 0.001078 | 0.000982 | 0        | 0.016732 | 0        | 0.000151 | 0        | 0.004636 |
| 0        | 0        | 0.000577 | 0.002377 | 0.000773 | 0.003172 | 0.000165 | 0        | 2.87E-05 | 0.000408 | 0        | 0        | 0        | 0.000433 |
| 0.007905 | 0.015079 | 0.043231 | 0.158718 | 0.11481  | 0.053996 | 0.003745 | 0        | 0.000155 | 0.003043 | 3.38E-05 | 0.000161 | 5.64E-05 | 0.051966 |
| 0.000577 | 0.008987 | 0.017313 | 0.012822 | 0.072535 | 0.128733 | 0.002311 | 0        | 0        | 0.005917 | 0        | 0.001323 | 0        | 0.020369 |
| 0.000306 | 0.008047 | 0.011224 | 0.028776 | 0.00352  | 0.021803 | 0.001771 | 0.000495 | 9.12E-05 | 0.021561 | 0.000104 | 0.02362  | 9.54E-05 | 0.013055 |
| 7.37E-05 | 0.012589 | 0.010027 | 0.033818 | 0.002873 | 0.028675 | 0.002334 | 0.000103 | 0.000211 | 0.029276 | 0        | 0.018123 | 0.000173 | 0.015582 |
| 3.60E-05 | 0.012286 | 0.001329 | 0.014612 | 0.000741 | 0.003596 | 0.0032   | 0        | 0.000166 | 0.009863 | 0        | 0.000222 | 0        | 0.004473 |
| 6.06E-05 | 0.004659 | 0.000161 | 0.008676 | 0.002621 | 0.010416 | 0.000703 | 0        | 2.70E-05 | 0.013632 | 0        | 0.00358  | 0        | 0.004939 |
| 2.95E-05 | 0.002592 | 0.011977 | 0.001267 | 0.001103 | 0.001316 | 4.50E-05 | 0        | 0.039694 | 0.003856 | 0.00021  | 0.001055 | 0.194289 | 0.003962 |
| 0        | 0        | 0.001691 | 0        | 0        | 0        | 0        | 0        | 0.001654 | 0        | 8.68E-05 | 0.000122 | 0.007048 | 0.000358 |
| 0        | 0.000129 | 0.001114 | 0        | 0        | 0        | 0        | 0        | 0.002817 | 0        | 0.000232 | 0        | 0.009286 | 0.000209 |
| 0        | 0.000136 | 0.0015   | 0.000176 | 0        | 0        | 0        | 0        | 0.002332 | 0.000433 | 0.00027  | 0        | 0.009226 | 0        |
| 0.07125  | 0.123972 | 0.169539 | 0.005865 | 0.007235 | 0.038877 | 0.074695 | 0.000242 | 0.089644 | 0.118321 | 0.25385  | 0.000257 | 5.64E-05 | 0.037092 |
| 0.70682  | 0.688617 | 0.3724   | 0.464733 | 0.119075 | 0.557654 | 0.277075 | 0.00399  | 0.329522 | 0.487955 | 0.654735 | 0.164668 | 0.669904 | 0.328247 |
| 0.035341 | 0.04838  | 0.040617 | 0.037093 | 0.00761  | 0.041346 | 0.016751 | 0.003086 | 0.046562 | 0.036707 | 0.05039  | 0.011885 | 0.078411 | 0.031044 |
| 0.001416 | 0.001431 | 0.00971  | 0.003361 | 0.000439 | 0.000899 | 0.002667 | 0.000112 | 0.001559 | 0.001656 | 0.000163 | 0        | 0        | 0.001618 |
| 0.014483 | 0.00027  | 0.198336 | 0.130828 | 0.362372 | 0.052381 | 0.156715 | 0.918994 | 0.025804 | 0.104118 | 0.000603 | 0.003414 | 0.001739 | 0.317393 |
| 0.00088  | 0.000144 | 0.012896 | 0.007824 | 0.022629 | 0.001511 | 0.009191 | 0.068413 | 0.003535 | 0.00744  | 0        | 0.000693 | 9.54E-05 | 0.029095 |
| 0.002058 | 0.000569 | 0.006289 | 0.009786 | 0.002568 | 0.019106 | 0.000956 | 0.000643 | 0.002893 | 0.00128  | 0.003523 | 0.001572 | 0.000742 | 0.001374 |
| 0.000775 | 0.000129 | 0.00192  | 0.001163 | 0.00022  | 0.00301  | 0.013929 | 0.00012  | 8.11E-05 | 0.000221 | 0        | 0.000236 | 5.64E-05 | 0.000233 |
| 0.001049 | 0        | 0        | 0.004904 | 0.000537 | 0.004006 | 0.004083 | 0.001107 | 0.00217  | 0.000212 | 0.000118 | 0        | 0        | 0.000972 |
| 0.001101 | 0        | 0.020719 | 0.009465 | 0.001701 | 0.00084  | 0.014932 | 0.000122 | 0.003947 | 0.001183 | 0.000123 | 0        | 0.00016  | 0.000513 |
| 4.75E-05 | 0        | 0        | 0        | 0        | 0        | 0.000473 | 0        | 0        | 0.000198 | 0        | 0        | 0        | 0.000223 |
| 0.000967 | 0.001611 | 0.010824 | 0.001293 | 0.000248 | 0.005889 | 0.005386 | 0        | 0.000473 | 0.00066  | 0.000207 | 0        | 0        | 0.000489 |
| 0.001438 | 0        | 0.003005 | 0.000875 | 0.00026  | 0.000449 | 0.014162 | 0        | 0.000255 | 0.000807 | 0.000408 | 0        | 8.67E-05 | 0.000471 |
| 0.000796 | 0.000121 | 0        | 0.000434 | 0.00024  | 0.000808 | 0.01198  | 0        | 0.000135 | 0.006342 | 0        | 0        | 0        | 0        |
| 0.002634 | 0.000968 | 0        | 0.000116 | 0        | 0        | 0.00741  | 0        | 0.000149 | 0.000892 | 0        | 0        | 0        | 0        |
| 9.50E-05 | 0        | 0        | 0        | 0        | 0        | 0.00455  | 0        | 0.001491 | 0.000176 | 0        | 0.00106  | 0        | 0        |
| 0.000179 | 0.000149 | 0.000259 | 0        | 0        | 0        | 0.010034 | 0        | 0.001007 | 0.004691 | 0.000136 | 0        | 7.37E-05 | 0.000358 |
| 0.003221 | 0.000261 | 0.004295 | 0.001544 | 0.000501 | 0.000384 | 0.042482 | 0        | 0.001713 | 0.003612 | 0.00462  | 0.014554 | 6.94E-05 | 0.006311 |
| 0.007669 | 0.001167 | 0.000112 | 0.00012  | 0        | 0        | 0.005741 | 0        | 0.002772 | 0.001192 | 0.000169 | 0.017775 | 0.000577 | 0.000101 |
| 0.034215 | 0.022457 | 0.006108 | 0.002572 | 0.001082 | 0.001283 | 0.16043  | 0.000122 | 0.110204 | 0.041455 | 9.17E-05 | 0.615547 | 0.012722 | 0.02456  |
| 0.008739 | 0.003173 | 0.000308 | 0.000318 | 0        | 0.001179 | 0.030575 | 0        | 0.00932  | 0.002975 | 3.86E-05 | 0.074668 | 0.003895 | 0.000594 |
| 0.054352 | 0.005924 | 0.019253 | 0.021651 | 0.195398 | 0.003928 | 0.070438 | 0.000608 | 0.077193 | 0.027693 | 0.0068   | 0.000615 | 0.001054 | 0.03681  |
| 0.002346 | 0.012005 | 0.000137 | 0.010171 | 0        | 0        | 9.51E-05 | 0        | 0.013427 | 0.009541 | 7.12E-05 | 0        | 5.20E-05 | 0        |
| 0.011446 | 0.004468 | 0.002077 | 0.001753 | 0.065421 | 0        | 0.006612 | 0        | 0.022485 | 0.007129 | 0.003427 | 0        | 0.001752 | 0.002213 |
| 0.001812 | 0.002443 | 0.000586 | 0.000759 | 0.005473 | 0.001629 | 0.03127  | 0        | 0.002954 | 0.009937 | 0.00047  | 0        | 0        | 0.009836 |
| 0.000197 | 0        | 0        | 0        | 0        | 0        | 0        | 0        | 9.12E-05 | 0        | 0        | 0        | 0        | 0        |
| 0.00172  | 0        | 0        | 0        | 0.000281 | 0.001394 | 6.25E-05 | 0        | 0        | 0        | 0        | 0        | 0        | 0.000113 |
| 0.000831 | 0        | 0        | 0        | 0.000476 | 0        | 0.000268 | 0        | 5.91E-05 | 0        | 0.000283 | 0        | 0.0002   | 0        |
| 0.000352 | 0.00028  | 0.000137 | 0        | 0        | 0        | 0        | 0        | 0.000145 | 0        | 8.32E-05 | 0        | 0        | 0.000125 |
| 0.000557 | 0        | 8.80E-05 | 0.000135 | 0.000753 | 0.000391 | 0.000323 | 0        | 0.000674 | 0.000385 | 0.000885 | 0        | 0        | 0.000459 |
| 6.88E-05 | 0        | 0        | 0        | 0        | 0.000886 | 0        | 0        | 9.29E-05 | 0        | 8.20E-05 | 0        | 0        | 0        |
| 0.000408 | 0        | 0        | 0.000142 | 0.000216 | 0.00041  | 5.25E-05 | 0        | 0.00015  | 0        | 0.00015  | 0        | 0        | 0        |
| 0        | 0        | 0        | 0        | 0        | 0        | 0        | 0        | 5.40E-05 | 0        | 0        | 0        | 0.000134 | 0        |
| 0        | 0        | 0        | 0        | 0        | 0        | 0        | 0        | 0        | 0        | 0        | 0        | 0.000104 | 0        |
| 0        | 0        | 0        | 0        | 0        | 0        | 0        | 0        | 2.20E-05 | 0        | 0        | 0        | 0.000781 | 0        |
| 0        | 0        | 0        | 0        | 0        | 0        | 0        | 0        | 0        | 0        | 0        | 0        | 0        | 0        |
| 3.60E-05 | 0        | 0        | 0        | 0        | 0        | 0        | 0        | 0.000542 | 0        | 4.10E-05 | 0        | 0.002923 | 0        |
| 0        | 0        | 0        | 0        | 0        | 0        | 0        | 0        | 0        | 0        | 0        | 0        | 0.00062  | 0        |
| 0        | 0        | 0.000342 | 0        | 0        | 0        | 0        | 0        | 0.000394 | 0        | 7.12E-05 | 0        | 0.002641 | 0.000382 |
| 0        | 0        | 0        | 0        | 0        | 0        | 0        | 0        | 0.000138 | 0        | 0        | 0        | 5.20E-05 | 0        |
| 0.00109  | 0        | 0        | 0        | 0        | 0        | 0.000108 | 0        | 0.00984  | 0.000439 | 2.29E-05 | 0        | 0        | 0        |
| 0.003206 | 0        | 0        | 0.00015  | 0        | 0.000463 | 0.000225 | 0        | 0.00128  | 0        | 0        | 0        | 0        | 0        |
| 0.004294 | 0.000231 | 8.31E-05 | 0        | 0        | 0        | 0.000135 | 0        | 0.003532 | 0        | 8.08E-05 | 0        | 0        | 0        |
| 0.012596 | 0.006177 | 0.004887 | 0.016518 | 0.000924 | 0.005954 | 0.010604 | 0.000863 | 0.113466 | 0.018062 | 0.016155 | 0.044701 | 0.000924 | 0.049391 |
| 0.000528 | 0.000127 | 0.000103 | 0        | 0        | 0        | 0.00024  | 0        | 0.073047 | 0        | 0.001266 | 0        | 0        | 0        |

| CC45     | CC46     | CC48     | CC52      | CC54     | CC55     | CC57     | CC58     | CC60     | CC62     | CC63     | CC64     | CC65     | CC67     |
|----------|----------|----------|-----------|----------|----------|----------|----------|----------|----------|----------|----------|----------|----------|
| 0.000182 | 0        | 0        | 0         | 0.019393 | 0.052165 | 3.73E-05 | 0.000401 | 0.000149 | 0.034177 | 0.002008 | 9.30E-06 | 0.001187 | 0.004904 |
| 0        | 0        | 0        | 0         | 0.000871 | 0.027829 | 0        | 0        | 8.70E-05 | 0        | 0        | 0        | 0        | 0.000229 |
| 0.002313 | 0.000172 | 0        | 0.000487  | 0.099629 | 0.000123 | 7.46E-05 | 0.001325 | 0.062727 | 0.14741  | 0.012015 | 3.51E-05 | 0.021828 | 0.001391 |
| 0.001332 | 0        | 0        | 0         | 0.012503 | 0        | 5.69E-05 | 0.000382 | 0.003172 | 0.023955 | 0.000323 | 0.000256 | 0.015134 | 0.008405 |
| 0.003928 | 0.000559 | 0        | 0         | 0.022012 | 0.012997 | 0.002615 | 0.015186 | 0.002669 | 0.018016 | 0.001585 | 0.004134 | 0.013574 | 0.020227 |
| 0.003579 | 0        | 0        | 0         | 0.01602  | 0.012032 | 0.001219 | 0.013407 | 0.002795 | 0.01607  | 0.001679 | 0.002619 | 0.010374 | 0.015238 |
| 0.002736 | 0        | 0        | 0         | 0        | 0        | 6.28E-05 | 0.004528 | 0.001164 | 0.033505 | 0.002738 | 0.000319 | 0.018974 | 0.006376 |
| 0.001382 | 0.000195 | 0        | 0         | 0.010012 | 0.001089 | 0.000188 | 0.00228  | 0.000947 | 0.005347 | 0.000302 | 0.000221 | 0.001293 | 0.002818 |
| 0        | 0        | 0.073007 | 0.123721  | 0.000536 | 0.037965 | 0.106753 | 0.001833 | 0        | 0.001906 | 0.000454 | 2.69E-05 | 0.008227 | 0        |
| 0        | 0        | 0.002038 | 0.00549   | 0        | 0.00373  | 0.004162 | 0.000148 | 0        | 0.000351 | 0.000125 | 1.03E-05 | 0.00128  | 5.20E-05 |
| 0        | 0        | 0.003601 | 0.006579  | 0.000274 | 0.005091 | 0.006255 | 0        | 0        | 0        | 0        | 0        | 0        | 0        |
| 0        | 0        | 0.002827 | 0.005463  | 0        | 0.003432 | 0.008181 | 0.000143 | 0        | 0        | 0.000271 | 0        | 0        | 0        |
| 0.147746 | 0.112374 | 0.000106 | 0.159983  | 0.025524 | 0        | 0.088107 | 0.030919 | 0.004741 | 0.005166 | 0.013527 | 0.005027 | 0.013067 | 0.013287 |
| 0.618226 | 0.578514 | 0.006329 | 0.421911  | 0.099545 | 0.181014 | 0.492491 | 0.764221 | 0.02829  | 0.158224 | 0.052648 | 0.936014 | 0.484379 | 0.779373 |
| 0.02942  | 0.186338 | 0.006474 | 0.056881  | 0.014021 | 0.010562 | 0.067491 | 0.075857 | 0.001933 | 0.00973  | 0.004855 | 0.04611  | 0.080563 | 0.039331 |
| 0.000428 | 0.000342 | 4.92E-05 | 0.00337   | 0.005316 | 0        | 0.003693 | 0.00246  | 0.004538 | 0.012479 | 0.006774 | 9.30E-06 | 0.012454 | 0.000156 |
| 0.030236 | 0.002897 | 0.000809 | 0.004253  | 0.519762 | 0.000714 | 0.019059 | 0.014333 | 0.019122 | 0.145504 | 0.018106 | 0.00117  | 0.055282 | 0.082262 |
| 0.001578 | 0        | 0        | 0.00044   | 0.041696 | 0.000144 | 0.0015   | 0.00087  | 0.001618 | 0.009038 | 0.001366 | 2.69E-05 | 0.003973 | 0.00569  |
| 0.001006 | 0.000536 | 0.148736 | 0.004712  | 0.052568 | 0.05778  | 0.00105  | 0.000817 | 0.000462 | 0.001154 | 0.000329 | 1.96E-05 | 0.003147 | 0.000656 |
| 0.001787 | 0        | 0.000118 | 0         | 0.00029  | 0        | 0.000218 | 0.000255 | 0.000159 | 0        | 0.001173 | 0        | 0.003613 | 0.000211 |
| 0.002104 | 0.002215 | 0        | 0.00147   | 0.001134 | 0        | 0.005375 | 0.000406 | 0.000177 | 0        | 0.001006 | 0        | 0        | 9.34E-05 |
| 0.000526 | 0        | 0        | 0         | 0.009833 | 0.000986 | 0.000968 | 0.000262 | 0.000571 | 0.004354 | 0.000777 | 9.71E-05 | 0.018441 | 0.000852 |
| 0        | 0.000186 | 0        | 0.000119  | 0        | 0        | 0.00041  | 0        | 0        | 0        | 0        | 0        | 0        | 0.000366 |
| 0.000689 | 0        | 0        | 0.000305  | 0.02677  | 0.000123 | 0.000872 | 0.001701 | 0.000155 | 0.002638 | 0.000662 | 2.58E-05 | 0.000627 | 0.000456 |
| 0.001768 | 0.001794 | 0        | 0.001088  | 0.005266 | 0.000144 | 0.00137  | 0.000887 | 0.0004   | 0        | 0.000485 | 2.07E-05 | 0.000267 | 0.000108 |
| 0.002442 | 0        | 6.14E-05 | 0.000321  | 0        | 0        | 0.000206 | 0        | 8.26E-05 | 0        | 0.014481 | 2.07E-05 | 0.000227 | 9.87E-05 |
| 0.000268 | 0        | 0        | 0.000235  | 0        | 0        | 0        | 0        | 9.00E-05 | 0.000421 | 0.001507 | 1.24E-05 | 0.021734 | 0.000164 |
| 0.00157  | 0.000166 | 0.00016  | 0         | 0        | 0        | 0.001054 | 0        | 0.000233 | 0.001585 | 0        | 0.000297 | 0        | 4.67E-05 |
| 0.000889 | 0.001256 | 0        | 0.000197  | 0.000251 | 0.000149 | 0.008497 | 0        | 0.000246 | 0        | 0.00291  | 3.10E-05 | 0        | 0        |
| 0.003156 | 0        | 5.16E-05 | 0.000371  | 0.001776 | 0.119099 | 0.000255 | 0.000559 | 0        | 0.001926 | 0.010085 | 0.000148 | 0.005374 | 0.001446 |
| 0.01376  | 0.000711 | 0.019541 | 0.002414  | 0        | 0.014015 | 0.006058 | 0.00297  | 0.000498 | 0.000441 | 0.002607 | 1.96E-05 | 0.000373 | 0.00049  |
| 0.047491 | 0        | 0.593393 | 0.003862  | 0        | 0.35347  | 0.000605 | 0.034018 | 0.020598 | 0.033043 | 0.065654 | 0.000195 | 0.003693 | 0.002714 |
| 0.004127 | 0        | 0.141131 | 0.000496  | 0.000307 | 0.101072 | 0.00012  | 0.000408 | 0.001644 | 0.01288  | 0.008015 | 5.16E-05 | 0.00232  | 0.000971 |
| 0.007733 | 0.003497 | 0.00032  | 0.0032785 | 0.009085 | 0.002445 | 0.042146 | 0.006123 | 0.76374  | 0.152716 | 0.662747 | 0.000392 | 0.133272 | 0.003545 |
| 0.000604 | 0        | 8.36E-05 | 0.00026   | 0        | 0.000123 | 0        | 0.002494 | 0        | 0.149747 | 0.011118 | 0        | 0.006267 | 0.000132 |
| 0.004189 | 0.005241 | 0        | 0.013536  | 0.001167 | 0.000149 | 0.038642 | 0.00053  | 0.062311 | 0.013141 | 0.042964 | 0.000242 | 0.01052  | 0.000275 |
| 0.011989 | 0.043492 | 0        | 0.001708  | 0.003211 | 0.000149 | 0.014294 | 0        | 0.0119   | 0.003371 | 0.032676 | 0.000187 | 0.000267 | 3.87E-05 |
| 0        | 0        | 0        | 0.002813  | 0        | 0        | 0        | 0        | 0        | 0        | 0.000162 | 0        | 0        | 0        |
| 0        | 0        | 0        | 0.004577  | 0        | 0        | 0.000324 | 0        | 0.001544 | 0        | 0.000261 | 1.14E-05 | 0.000307 | 0        |
| 0.000375 | 0        | 0        | 0.00147   | 0        | 0        | 0        | 0        | 0.000159 | 0        | 0.005569 | 3.31E-05 | 0        | 0        |
| 6.34E-05 | 0        | 0        | 0.002356  | 0        | 0.00036  | 0.001368 | 0.006796 | 8.41E-05 | 0        | 0.001747 | 1.24E-05 | 0        | 9.61E-05 |
| 0.00218  | 0.009104 | 0        | 0.000653  | 0.000184 | 0.000216 | 0.017594 | 0        | 8.55E-05 | 0        | 0.000136 | 1.55E-05 | 0        | 0        |
| 6.02E-05 | 0.012518 | 0        | 0.002904  | 0        | 0        | 0.007236 | 0.000139 | 0        | 0        | 0        | 0        | 0        | 0        |
| 6.97E-05 | 0.001977 | 0        | 0.000598  | 0        | 0        | 0.001198 | 0        | 0        | 0        | 0        | 3.31E-05 | 0        | 0        |
| 0        | 0.000189 | 4.67E-05 | 0.001642  | 0        | 0        | 0        | 0        | 0        | 0        | 0        | 0        | 0        | 0        |
| 0        | 0        | 0.000231 | 0.000468  | 0        | 0        | 0        | 0        | 0        | 0        | 0        | 0        | 0        | 0        |
| 0        | 0.000862 | 0.000253 | 0.000424  | 0        | 0.000118 | 0.000294 | 0        | 0        | 0        | 0        | 0        | 0        | 0        |
| 0        | 0        | 0        | 5.26E-05  | 0        | 0        | 0        | 0        | 0        | 0        | 0        | 0        | 0        | 0        |
| 0        | 0        | 0        | 0.002688  | 0        | 0        | 0.000214 | 0        | 0        | 0        | 0        | 0        | 0        | 0        |
| 0        | 0        | 0        | 0.000952  | 0        | 0        | 4.91E-05 | 0        | 0        | 0        | 0        | 0        | 0        | 0        |
| 0        | 0.000179 | 9.09E-05 | 0.002774  | 0        | 0        | 0.000532 | 0        | 0        | 0        | 0        | 0        | 0        | 0        |
| 0        | 0        | 0        | 4.98E-05  | 0        | 0        | 0        | 0        | 0        | 0        | 0        | 0        | 0        | 0        |
| 0.011251 | 0        | 0        | 0.003948  | 0        | 0        | 0.001808 | 0.000972 | 0        | 0        | 0        | 0.000336 | 0        | 0.000371 |
| 0.003677 | 0        | 0        | 0         | 0        | 0        | 0.001843 | 0        | 0        | 0        | 0        | 0        | 0        | 0.000113 |
| 0.001567 | 0        | 0        | 0.001487  | 0        | 0        | 0.004301 | 0.006541 | 0        | 0.000391 | 0        | 4.44E-05 | 0        | 0.000272 |
| 0.031076 | 0.034492 | 0.000497 | 0.117259  | 0.001044 | 0.000714 | 0.03915  | 0.005831 | 0.00091  | 0.001314 | 0.014153 | 0.001744 | 0.047442 | 0.00632  |
| 0.000496 | 0.000193 | 4.67E-05 | 0.000426  | 0        | 0        | 0        | 0        | 0        | 0        | 0        | 2.17E-05 | 0.00052  | 0.000424 |

| CC68     | CC69     | CC70     | CC71     | CC72     | CC73     |
|----------|----------|----------|----------|----------|----------|
| 0.000357 | 0.004277 | 0        | 8.01E-05 | 0        | 0        |
| 0        | 0.000251 | 0        | 7.01E-05 | 0.000108 | 0        |
| 0.003757 | 0.000135 | 0.001041 | 0.009629 | 0.002972 | 0.00688  |
| 0.003098 | 0.000109 | 0.000478 | 0        | 4.24E-05 | 0        |
| 0.034599 | 0.003724 | 0.009748 | 6.61E-05 | 0.000392 | 0.000915 |
| 0.026271 | 0.005755 | 0.00353  | 9.21E-05 | 0.000384 | 0.001286 |
| 0.042836 | 0.015908 | 0.000121 | 0.000162 | 5.98E-05 | 0.000573 |
| 0.002396 | 0.00277  | 0.000193 | 0        | 0        | 0.000139 |
| 0        | 0.00024  | 0.028019 | 6.21E-05 | 0.009381 | 0.018388 |
| 0        | 0        | 0.001177 | 0        | 0.000501 | 0.000724 |
| 0        | 0        | 0.001391 | 0        | 0.000764 | 0.000903 |
| 0.000199 | 0        | 0.002681 | 0        | 0.000912 | 0.002201 |
| 0.008892 | 0.003091 | 0        | 0.057849 | 0.025579 | 0.04134  |
| 0.719446 | 0.084429 | 0.17473  | 0.083226 | 0.08139  | 0.053855 |
| 0.036317 | 0.004266 | 0.009071 | 0.00682  | 0.00735  | 0.003869 |
| 0.000691 | 0.004805 | 0        | 0.000318 | 0.000837 | 0.000498 |
| 0.024875 | 0.21564  | 0.041297 | 0.068331 | 0.251845 | 0.110843 |
| 0.001568 | 0.016086 | 0.001462 | 0.003907 | 0.016365 | 0.010019 |
| 0.003037 | 0.00039  | 0.236115 | 0.002425 | 0.008685 | 0.024811 |
| 0.000699 | 9.46E-05 | 0.006953 | 0.020229 | 0.009642 | 0.000649 |
| 0.00135  | 0.001012 | 0        | 6.21E-05 | 0.000102 | 0        |
| 0        | 0.001143 | 0.003758 | 0        | 0.001244 | 0.006156 |
| 0        | 0        | 0        | 0        | 0.003879 | 0        |
| 0.001764 | 0.000692 | 0        | 2.80E-05 | 0.000392 | 0.000145 |
| 0.000196 | 0.000561 | 0        | 0        | 0.002511 | 0        |
| 0        | 0.00158  | 0        | 0        | 0.000249 | 0        |
| 0.000159 | 0.000531 | 0        | 0        | 0        | 0        |
| 0.001549 | 0.003254 | 0.00328  | 0.001562 | 0.013305 | 0.001581 |
| 0.000177 | 0.004164 | 0        | 3.00E-05 | 0.000235 | 0.000788 |
| 0.001872 | 0.008857 | 0.051217 | 0.000242 | 0.024127 | 0.021695 |
| 0.000654 | 0.007237 | 0.004607 | 0.00015  | 0.001454 | 0.00029  |
| 0.009996 | 0.106115 | 0.113337 | 0.004671 | 0.011806 | 0.016384 |
| 0.001554 | 0.07214  | 0.025587 | 0.000663 | 0.003051 | 0.001535 |
| 0.019799 | 0.357408 | 0.247739 | 0.441018 | 0.231406 | 0.231069 |
| 0.001364 | 0.024881 | 0.000128 | 0.002561 | 0.003981 | 0.113548 |
| 0.00067  | 0.021572 | 0.007274 | 0.022478 | 0.015519 | 0.014438 |
| 0.001006 | 0.00992  | 7.13E-05 | 0        | 0.001277 | 0        |
| 0        | 0        | 0        | 0        | 0        | 0        |
| 0        | 0.000488 | 0        | 0        | 0        | 0.000104 |
| 0        | 0        | 0        | 0        | 0.000145 | 0        |
| 0        | 0.000189 | 0        | 0.000234 | 0        | 0.000643 |
| 0        | 0        | 0        | 6.41E-05 | 0.001103 | 0        |
| 0        | 0        | 0.000264 | 0        | 5.40E-05 | 0        |
| 0        | 0        | 0.00328  | 0        | 5.40E-05 | 0.000191 |
| 0        | 0        | 0.000143 | 0        | 0        | 0        |
| 0        | 0        | 0        | 0        | 0        | 0        |
| 0        | 0        | 0        | 0        | 0        | 0        |
| 0        | 0        | 0        | 0        | 0        | 0        |
| 0        | 0        | 0        | 0        | 0        | 0        |
| 0        | 0        | 0        | 0        | 0        | 0        |
| 0        | 0        | 0        | 0        | 0        | 0        |
| 0        | 0        | 0        | 0        | 0        | 0        |
| 0        | 0        | 0        | 0        | 0        | 0        |
| 0.014156 | 0.000251 | 0        | 1.80E-05 | 0.009746 | 0.035867 |
| 0.001319 | 0        | 0        | 2.00E-05 | 0        | 0        |
| 0        | 0        | 0        | 0        | 0        | 0.021898 |
| 0.029994 | 0.015799 | 0.021308 | 0.272909 | 0.241152 | 0.255776 |
| 0.003381 | 0.000233 | 0        | 2.20E-05 | 0.015997 | 0        |

**Supplementary table S6. The cladogram of oropharyngeal microbial structure and their predominant bacteria between CCs and HS**

| Biomaker_names                                                                                                                             | Logarithm value |
|--------------------------------------------------------------------------------------------------------------------------------------------|-----------------|
| d__Bacteria.p__Synergistota.c__Synergistia.o__Synergistales.f__Synergistaceae.g__Fretibacterium                                            | 2.632274171     |
| d__Bacteria.p__Proteobacteria.c__Gammaproteobacteria.o__Oceanospirillales.f__Halomonadaceae.g__Halomonas                                   | 3.8797074       |
| d__Bacteria.p__Patiscibacteria.c__Saccharimonadia.o__Saccharimonadales.f__Saccharimonadales.g__Saccharimonadales                           | 3.406427833     |
| d__Bacteria.p__Actinobacteriota.c__Coriobacteriia.o__Coriobacteriales.f__Atopobiaceae.g__Olsenella                                         | 2.162704196     |
| d__Bacteria.p__Firmicutes.c__Negativicutes.o__Veillonellales.f__Veillonellaceae.g__Anaeroglobus                                            | 2.188659265     |
| d__Bacteria.p__Firmicutes.c__Clostridia.o__Peptostreptococcales_Tissierellales.f__Anaerovoracaceae.g__Anaerovoracaceae_Family_XIII_UCG_001 | 2.121238445     |
| d__Bacteria.p__Proteobacteria.c__Alphaproteobacteria.o__Caulobacteriales.f__Caulobacteraceae                                               | 2.050206929     |
| d__Bacteria.p__Bacteroidota.c__Bacteroidia.o__Bacteroidales.f__Bacteroidaceae.g__Bacteroides                                               | 3.851388474     |
| d__Bacteria.p__Firmicutes.c__Clostridia.o__Oscillospirales.f__Oscillospiraceae                                                             | 3.252406272     |
| d__Bacteria.p__Proteobacteria.c__Gammaproteobacteria.o__Cardiobacteriales.f__Cardiobacteriaceae.g__Cardiobacterium                         | 2.689105282     |
| d__Bacteria.p__Proteobacteria.c__Gammaproteobacteria.o__Burkholderiales.f__Alcaligenaceae                                                  | 2.588068969     |
| d__Bacteria.p__Firmicutes.c__Clostridia.o__Peptostreptococcales_Tissierellales.f__Anaerovoracaceae.g__Mogibacterium                        | 2.075741042     |
| d__Bacteria.p__Patiscibacteria.c__Gracilibacteria.o__Gracilibacteria.f__Gracilibacteria                                                    | 2.665979957     |
| d__Bacteria.p__Actinobacteriota.c__Coriobacteriia.o__Coriobacteriales.f__Atopobiaceae.g__Atopobium                                         | 3.386849842     |
| d__Bacteria.p__Firmicutes.c__Bacilli                                                                                                       | 5.375146458     |
| d__Bacteria.p__Actinobacteriota.c__Coriobacteriia.o__Coriobacteriales                                                                      | 3.420666635     |
| d__Bacteria.p__Campilobacterota.c__Campylobacteria.o__Campylobacteriales.f__Campylobacteraceae.g__Campylobacter                            | 3.985310357     |
| d__Bacteria.p__Bacteroidota.c__Bacteroidia.o__Bacteroidales.f__Prevotellaceae.g__Prevotellaceae_unclassified                               | 2.383586207     |
| d__Bacteria.p__Firmicutes.c__Bacilli.o__RF39.f__RF39                                                                                       | 2.429683573     |
| d__Bacteria.p__Firmicutes.c__Clostridia.o__Lachnospirales                                                                                  | 4.551732436     |
| d__Bacteria.p__Proteobacteria.c__Gammaproteobacteria.o__Xanthomonadales                                                                    | 2.630660894     |
| d__Bacteria.p__Firmicutes.c__Negativicutes.o__Acidaminococcales.f__Acidaminococcaceae.g__Phascolarctobacterium                             | 2.687054354     |
| d__Bacteria.p__Proteobacteria.c__Gammaproteobacteria.o__Burkholderiales.f__Neisseriaceae.g__Alysiella                                      | 2.289797616     |
| d__Bacteria.p__Firmicutes.c__Clostridia.o__Clostridia_vadinBB60_group.f__Clostridia_vadinBB60_group                                        | 2.672176492     |
| d__Bacteria.p__Firmicutes.c__Clostridia.o__Christensenellales.f__Christensenellaceae.g__Christensenellaceae_R_7_group                      | 2.768921357     |
| d__Bacteria.p__Bacteroidota.c__Bacteroidia.o__Bacteroidales                                                                                | 5.48322266      |
| d__Bacteria.p__Firmicutes.c__Clostridia.o__Peptostreptococcales_Tissierellales.f__Anaerovoracaceae                                         | 3.542548659     |
| d__Bacteria.p__Proteobacteria                                                                                                              | 5.412144028     |
| d__Bacteria.p__Spirochaetota.c__Spirochaetia.o__Spirochaetales.f__Spirochaetaceae                                                          | 3.428923641     |
| d__Bacteria.p__Campilobacterota.c__Campylobacteria.o__Campylobacteriales                                                                   | 4.012730903     |
| d__Bacteria.p__Bacteroidota.c__Bacteroidia.o__Flavobacteriales                                                                             | 4.280226389     |
| d__Bacteria.p__Actinobacteriota.c__Actinobacteria.o__Actinomycetales.f__Actinomycetaceae.g__F0332                                          | 3.090757563     |
| d__Bacteria.p__Proteobacteria.c__Gammaproteobacteria.o__Pseudomonadales.f__Moraxellaceae.g__Acinetobacter                                  | 3.09095933      |
| d__Bacteria.p__Patiscibacteria                                                                                                             | 4.405890881     |
| d__Bacteria.p__Bacteroidota.c__Bacteroidia.o__Bacteroidales.f__Rikenellaceae.g__Alistipes                                                  | 2.794984633     |
| d__Bacteria.p__Patiscibacteria.c__Saccharimonadia.o__Saccharimonadales.f__Saccharimonadaceae.g__Saccharimonadaceae_unclassified            | 2.992158534     |
| d__Bacteria.p__Firmicutes.c__Bacilli.o__Lactobacillales.f__Streptococcaceae                                                                | 5.290103276     |
| d__Bacteria.p__Firmicutes.c__Clostridia.o__Peptostreptococcales_Tissierellales.f__Anaerovoracaceae.g__Eubacterium_brachy_group             | 2.296711856     |
| d__Bacteria.p__Actinobacteriota.c__Actinobacteria.o__Propionibacteriales                                                                   | 2.473518029     |
| d__Bacteria.p__Proteobacteria.c__Gammaproteobacteria.o__Burkholderiales.f__Comamonadaceae.g__Comamonas                                     | 2.354190204     |
| d__Bacteria.p__Bacteroidota.c__Bacteroidia.o__Bacteroidales.f__Tannerellaceae.g__Tannerella                                                | 3.430594769     |
| d__Bacteria.p__Patiscibacteria.c__Saccharimonadia.o__Saccharimonadales.f__Saccharimonadales                                                | 3.406427833     |
| d__Bacteria.p__Spirochaetota.c__Spirochaetia.o__Spirochaetales                                                                             | 3.428923641     |
| d__Bacteria.p__Firmicutes.c__Bacilli.o__Lactobacillales.f__Lactobacillales_unclassified                                                    | 3.24680622      |
| d__Bacteria.p__Firmicutes.c__Clostridia.o__Oscillospirales.f__Ruminococcaceae.g__Faecalibacterium                                          | 3.625751253     |
| d__Bacteria.p__Proteobacteria.c__Gammaproteobacteria.o__Burkholderiales.f__Neisseriaceae                                                   | 5.234468118     |
| d__Bacteria.p__Spirochaetota.c__Spirochaetia                                                                                               | 3.428923641     |
| d__Bacteria.p__Firmicutes.c__Clostridia.o__Peptostreptococcales_Tissierellales                                                             | 4.017174586     |
| d__Bacteria.p__Proteobacteria.c__Gammaproteobacteria.o__Xanthomonadales.f__Xanthomonadaceae.g__Xanthomonadaceae_unclassified               | 2.627002939     |
| d__Bacteria.p__Patiscibacteria.c__Saccharimonadia.o__Saccharimonadales.f__Saccharimonadaceae.g__Saccharimonadaceae                         | 3.012554541     |
| d__Bacteria.p__Firmicutes.c__Clostridia.o__Lachnospirales.f__Lachnospiraceae.g__Blautia                                                    | 2.402864785     |
| d__Bacteria.p__Firmicutes.c__Clostridia.o__Oscillospirales.f__Ruminococcaceae.g__Subdoligranulum                                           | 2.605006869     |
| d__Bacteria.p__Firmicutes.c__Clostridia.o__Lachnospirales.f__Lachnospiraceae.g__Lachnoclostridium                                          | 2.563493709     |
| d__Bacteria.p__Firmicutes.c__Clostridia.o__Peptostreptococcales_Tissierellales.f__Anaerovoracaceae.g__Eubacterium_saphenum_group           | 2.3649699       |
| d__Bacteria.p__Proteobacteria.c__Gammaproteobacteria.o__Burkholderiales.f__Sutterellaceae                                                  | 2.571832679     |
| d__Bacteria.p__Proteobacteria.c__Gammaproteobacteria.o__Enterobacteriales.f__Yersiniaceae                                                  | 2.574018947     |

|                                                                                                                                           |             |
|-------------------------------------------------------------------------------------------------------------------------------------------|-------------|
| d__Bacteria.p__Patescibacteria.c__Saccharimonadia.o__Saccharimonadales                                                                    | 4.223034233 |
| d__Bacteria.p__Patescibacteria.c__Gracilibacteria.o__Absconditabacteriales_SR1.f__Absconditabacteriales_SR1_g__Absconditabacteriales_SR1_ | 3.916048306 |
| d__Bacteria.p__Firmicutes.c__Bacilli.o__Lactobacillales.f__P5D1_392.g__P5D1_392                                                           | 3.424013405 |
| d__Bacteria.p__Bacteroidota.c__Bacteroidia.o__Bacteroidales.f__Rikenellaceae                                                              | 2.995765846 |
| d__Bacteria.p__Proteobacteria.c__Gammaproteobacteria.o__Pasteurellales.f__Pasteurellaceae.g__Haemophilus                                  | 4.713891605 |
| d__Bacteria.p__Bacteroidota.c__Bacteroidia.o__Bacteroidales.f__Prevotellaceae.g__Prevotella                                               | 5.226834003 |
| d__Bacteria.p__Proteobacteria.c__Alphaproteobacteria.o__Sphingomonadales.f__Sphingomonadaceae                                             | 3.082728092 |
| d__Bacteria.p__Spirochaetota                                                                                                              | 3.428923641 |
| d__Bacteria.p__Firmicutes.c__Clostridia.o__Lachnospirales.f__Lachnospiraceae.g__Agathobacter                                              | 2.64362065  |
| d__Bacteria.p__Proteobacteria.c__Gammaproteobacteria.o__Pasteurellales                                                                    | 4.821942858 |
| d__Bacteria.p__Bacteroidota.c__Bacteroidia                                                                                                | 5.510087816 |
| d__Bacteria.p__Proteobacteria.c__Alphaproteobacteria.o__Rhizobiales.f__Rhizobiaceae.g__Rhizobiaceae_unclassified                          | 2.496381824 |
| d__Bacteria.p__Firmicutes.c__Bacilli.o__Erysipelotrichales.f__Erysipelatoclostridiaceae                                                   | 2.134522973 |
| d__Bacteria.p__Proteobacteria.c__Gammaproteobacteria.o__Burkholderiales.f__Alcaligenaceae.g__Achromobacter                                | 2.372030147 |
| d__Bacteria.p__Firmicutes.c__Negativicutes.o__Acidaminococcales                                                                           | 2.687054354 |
| d__Bacteria.p__Firmicutes.c__Clostridia.o__Lachnospirales.f__Lachnospiraceae.g__Oribacterium                                              | 3.665527103 |
| d__Bacteria.p__Fusobacteriota.c__Fusobacteriia.o__Fusobacteriales.f__Fusobacteriaceae                                                     | 4.828465519 |
| d__Bacteria.p__Actinobacteriota.c__Actinobacteria.o__Corynebacteriales.f__Nocardiaceae.g__Rhodococcus                                     | 3.321219311 |
| d__Bacteria.p__Proteobacteria.c__Alphaproteobacteria.o__Sphingomonadales.f__Sphingomonadaceae.g__Sphingomonas                             | 3.073234622 |
| d__Bacteria.p__Bacteroidota.c__Bacteroidia.o__Bacteroidales.f__Tannerellaceae                                                             | 3.487183521 |
| d__Bacteria.p__Bacteroidota.c__Bacteroidia.o__Sphingobacteriales.f__Lentimicrobiaceae                                                     | 2.502383531 |
| d__Bacteria.p__Actinobacteriota.c__Actinobacteria.o__Corynebacteriales.f__Corynebacteriaceae                                              | 3.473272604 |
| d__Bacteria.p__Synergistota.c__Synergistia.o__Synergistales                                                                               | 2.635259098 |
| d__Bacteria.p__Bacteroidota                                                                                                               | 5.510087816 |
| d__Bacteria.p__Bacteroidota.c__Bacteroidia.o__Bacteroidales.f__Porphyromonadaceae.g__Porphyromonas                                        | 4.699186728 |
| d__Bacteria.p__Bacteroidota.c__Bacteroidia.o__Bacteroidales.f__Prevotellaceae.g__Alloprevotella                                           | 4.835033608 |
| d__Bacteria.p__Firmicutes.c__Bacilli.o__Mycoplasmatales.f__Mycoplasmataceae.g__Mycoplasma                                                 | 2.674949042 |
| d__Bacteria.p__Firmicutes.c__Clostridia.o__Lachnospirales.f__Lachnospiraceae.g__Johnsonella                                               | 3.139329677 |
| d__Bacteria.p__Firmicutes.c__Clostridia.o__Lachnospirales.f__Lachnospiraceae.g__Ruminococcus_torques_group                                | 2.264114186 |
| d__Bacteria.p__Synergistota.c__Synergistia.o__Synergistales.f__Synergistaceae                                                             | 2.635259098 |
| d__Bacteria.p__Proteobacteria.c__Alphaproteobacteria.o__Caulobacteriales.f__Caulobacteraceae.g__Brevundimonas                             | 1.891916868 |
| d__Bacteria.p__Synergistota                                                                                                               | 2.635259098 |
| d__Bacteria.p__Firmicutes.c__Clostridia.o__Lachnospirales.f__Lachnospiraceae.g__Lachnospiraceae_ND3007_group                              | 2.46693069  |
| d__Bacteria.p__Fusobacteriota.c__Fusobacteriia.o__Fusobacteriales.f__Leptotrichiaceae                                                     | 5.08932294  |
| d__Bacteria.p__Proteobacteria.c__Gammaproteobacteria.o__Enterobacteriales.f__Enterobacteriaceae.g__Escherichia_Shigella                   | 2.345665651 |
| d__Bacteria.p__Bacteroidota.c__Bacteroidia.o__Flavobacteriales.f__Flavobacteriaceae.g__Capnocytophaga                                     | 4.240812305 |
| d__Bacteria.p__Proteobacteria.c__Gammaproteobacteria.o__Pseudomonadales                                                                   | 4.091970622 |
| d__Bacteria.p__Firmicutes.c__Negativicutes.o__Veillonellales_Selenomonadales.f__Selenomonadaceae.g__Megamonas                             | 2.90995982  |
| d__Bacteria.p__Synergistota.c__Synergistia                                                                                                | 2.635259098 |
| d__Bacteria.p__Firmicutes.c__Clostridia.o__Peptococcales                                                                                  | 2.539276348 |
| d__Bacteria.p__Bacteroidota.c__Bacteroidia.o__Bacteroidales.f__Porphyromonadaceae                                                         | 4.699186728 |
| d__Bacteria.p__Bacteroidota.c__Bacteroidia.o__Flavobacteriales.f__Flavobacteriaceae                                                       | 4.240990063 |
| d__Bacteria.p__Desulfobacterota                                                                                                           | 2.651030435 |
| d__Bacteria.p__Firmicutes.c__Clostridia.o__Oscillospirales.f__Oscillospiraceae.g__UCG_002                                                 | 2.666358636 |
| d__Bacteria.p__Firmicutes.c__Clostridia.o__Oscillospirales.f__Eubacterium_coprostanoligenes_group                                         | 2.613886785 |
| d__Bacteria.p__Bacteroidota.c__Bacteroidia.o__Bacteroidales.f__Paludibacteraceae                                                          | 2.847946573 |
| d__Bacteria.p__Bacteroidota.c__Bacteroidia.o__Bacteroidales.f__Tannerellaceae.g__Parabacteroides                                          | 2.574142137 |
| d__Bacteria.p__Actinobacteriota.c__Actinobacteria.o__Propionibacteriales.f__Propionibacteriaceae                                          | 2.473518029 |
| d__Bacteria.p__Firmicutes.c__Clostridia.o__Oscillospirales.f__Ruminococcaceae                                                             | 3.757072013 |
| d__Bacteria.p__Proteobacteria.c__Alphaproteobacteria.o__Sphingomonadales                                                                  | 3.082728092 |
| d__Bacteria.p__Firmicutes.c__Clostridia.o__Peptostreptococcales_Tissierellales.f__Peptostreptococcaceae.g__Eubacterium_yurii_group        | 2.326923879 |
| d__Bacteria.p__Proteobacteria.c__Gammaproteobacteria.o__Burkholderiales.f__Sutterellaceae.g__Parasutterella                               | 2.306675926 |
| d__Bacteria.p__Firmicutes.c__Clostridia.o__Lachnospirales.f__Lachnospiraceae.g__Stomatobaculum                                            | 3.58847435  |
| d__Bacteria.p__Bacteroidota.c__Bacteroidia.o__Flavobacteriales.f__Weeksellaceae                                                           | 3.216659936 |
| d__Bacteria.p__Campilobacterota.c__Campylobacteria.o__Campylobacteriales.f__Campylobacteraceae                                            | 3.985310357 |
| d__Bacteria.p__Proteobacteria.c__Gammaproteobacteria.o__Cardiobacteriales                                                                 | 2.689105282 |
| d__Bacteria.p__Firmicutes.c__Bacilli.o__Erysipelotrichales                                                                                | 3.611470199 |
| d__Bacteria.p__Proteobacteria.c__Gammaproteobacteria.o__Pasteurellales.f__Pasteurellaceae.g__Aggregatibacter                              | 3.635251608 |

|                                                                                                                                               |             |
|-----------------------------------------------------------------------------------------------------------------------------------------------|-------------|
| d__Bacteria.p__Fusobacteriia.c__Fusobacteriia.o__Fusobacteriales.f__Fusobacteriaceae.g__Fusobacterium                                         | 4.828465519 |
| d__Bacteria.p__Patiscibacteria.c__Gracilibacteria                                                                                             | 3.941992212 |
| d__Bacteria.p__Campilobacterota.c__Campylobacteria                                                                                            | 4.012730903 |
| d__Bacteria.p__Firmicutes.c__Clostridia.o__Lachnospirales.f__Lachnospiraceae.g__Fusicatenibacter                                              | 3.288705767 |
| d__Bacteria.p__Actinobacteriia.c__Coriobacteriia.o__Coriobacteriales.f__Atopobiaceae                                                          | 3.412026018 |
| d__Bacteria.p__Bacteroidota.c__Bacteroidia.o__Bacteroidales.f__Prevotellaceae                                                                 | 5.376521861 |
| d__Bacteria.p__Actinobacteriia.c__Actinobacteria.o__Bifidobacteriales.f__Bifidobacteriaceae                                                   | 2.989568146 |
| d__Bacteria.p__Bacteroidota.c__Bacteroidia.o__Flavobacteriales.f__Weeksellaceae.g__Bergeyella                                                 | 3.164143949 |
| d__Bacteria.p__Firmicutes.c__Bacilli.o__Lactobacillales                                                                                       | 5.32602313  |
| d__Bacteria.p__Firmicutes.c__Clostridia.o__Clostridia_vadinBB60_group                                                                         | 2.672176492 |
| d__Bacteria.p__Proteobacteria.c__Gammaproteobacteria.o__Pasteurellales.f__Pasteurellaceae                                                     | 4.821942858 |
| d__Bacteria.p__Proteobacteria.c__Gammaproteobacteria.o__Enterobacteriales.f__Yersiniaceae.g__Serratia                                         | 2.574018947 |
| d__Bacteria.p__Firmicutes.c__Clostridia.o__Oscillospirales.f__Eubacterium_coprostanoligenes_group.g__Eubacterium_coprostanoligenes_group      | 2.613886785 |
| d__Bacteria.p__Patiscibacteria.c__Saccharimonadia                                                                                             | 4.223034233 |
| d__Bacteria.p__Actinobacteriia.c__Actinobacteria.o__Corynebacteriales.f__Corynebacteriaceae.g__Corynebacterium                                | 3.45764358  |
| d__Bacteria.p__Actinobacteriia.c__Actinobacteria.o__Bifidobacteriales                                                                         | 2.989568146 |
| d__Bacteria.p__Firmicutes.c__Bacilli.o__Erysipelotrichales.f__Erysipelotrichaceae                                                             | 3.59674094  |
| d__Bacteria.p__Firmicutes.c__Bacilli.o__RF39                                                                                                  | 2.429683573 |
| d__Bacteria.p__Proteobacteria.c__Gammaproteobacteria.o__Pseudomonadales.f__Pseudomonadaceae                                                   | 3.772791273 |
| d__Bacteria.p__Firmicutes.c__Bacilli.o__Lactobacillales.f__Lactobacillales_unclassified.g__Lactobacillales_unclassified                       | 3.24680622  |
| d__Bacteria.p__Firmicutes.c__Bacilli.o__Lactobacillales.f__Streptococcaceae.g__Streptococcus                                                  | 5.290103276 |
| d__Bacteria.p__Proteobacteria.c__Gammaproteobacteria.o__Burkholderiales.f__Neisseriaceae.g__Neisseria                                         | 5.229838061 |
| d__Bacteria.p__Actinobacteriia.c__Actinobacteria.o__Bifidobacteriales.f__Bifidobacteriaceae.g__Bifidobacterium                                | 2.889980781 |
| d__Bacteria.p__Patiscibacteria.c__Gracilibacteria.o__Absconditabacteriales__SR1__                                                             | 3.916048306 |
| d__Bacteria.p__Proteobacteria.c__Gammaproteobacteria.o__Cardiobacteriales.f__Cardiobacteriaceae                                               | 2.689105282 |
| d__Bacteria.p__Firmicutes.c__Clostridia.o__Christensenellales                                                                                 | 2.768921357 |
| d__Bacteria.p__Firmicutes.c__Clostridia.o__Peptostreptococcales_Tissierellales.f__Peptostreptococcaceae.g__Peptostreptococcaceae_unclassified | 2.027306224 |
| d__Bacteria.p__Firmicutes.c__Clostridia.o__Lachnospirales.f__Lachnospiraceae.g__Butyrivibrio                                                  | 2.611833903 |
| d__Bacteria.p__Firmicutes.c__Clostridia.o__Clostridia_vadinBB60_group.f__Clostridia_vadinBB60_group.g__Clostridia_vadinBB60_group             | 2.672176492 |
| d__Bacteria.p__Firmicutes.c__Clostridia.o__Peptostreptococcales_Tissierellales.f__Peptostreptococcales_Tissierellales                         | 3.290086733 |
| d__Bacteria.p__Proteobacteria.c__Gammaproteobacteria.o__Burkholderiales.f__Comamonadaceae.g__Acidovorax                                       | 2.480664282 |
| d__Bacteria.p__Firmicutes.c__Clostridia.o__Clostridia_UCG_014                                                                                 | 3.575291049 |
| d__Bacteria.p__Proteobacteria.c__Gammaproteobacteria.o__Burkholderiales                                                                       | 5.247072604 |
| d__Bacteria.p__Firmicutes.c__Clostridia.o__Lachnospirales.f__Lachnospiraceae.g__Roseburia                                                     | 2.559741133 |
| d__Bacteria.p__Firmicutes.c__Clostridia.o__Peptostreptococcales_Tissierellales.f__Anaerovoracaceae.g__Eubacterium_nodatum_group               | 3.395359161 |
| d__Bacteria.p__Firmicutes.c__Bacilli.o__Mycoplasmatales.f__Mycoplasmataceae                                                                   | 2.674949042 |
| d__Bacteria.p__Patiscibacteria.c__Gracilibacteria.o__Gracilibacteria                                                                          | 2.665979957 |
| d__Bacteria.p__Proteobacteria.c__Gammaproteobacteria.o__Pseudomonadales.f__Moraxellaceae                                                      | 3.808361838 |
| d__Bacteria.p__Spirochaetota.c__Spirochaetia.o__Spirochaetales.f__Spirochaetaceae.g__Treponema                                                | 3.42817789  |
| d__Bacteria.p__Proteobacteria.c__Gammaproteobacteria.o__Oceanospirillales                                                                     | 3.8797074   |
| d__Bacteria.p__Firmicutes.c__Clostridia.o__Peptococcales.f__Peptococcaceae.g__Peptococcus                                                     | 2.512409029 |
| d__Bacteria.p__Firmicutes.c__Clostridia.o__Lachnospirales.f__Lachnospiraceae.g__Lachnospira                                                   | 2.629583091 |
| d__Bacteria.p__Firmicutes.c__Bacilli.o__Lactobacillales.f__P5D1_392                                                                           | 3.424013405 |
| d__Bacteria.p__Patiscibacteria.c__Gracilibacteria.o__Absconditabacteriales__SR1__.f__Absconditabacteriales__SR1__                             | 3.916048306 |
| d__Bacteria.p__Firmicutes                                                                                                                     | 5.570850845 |
| d__Bacteria.p__Firmicutes.c__Bacilli.o__Erysipelotrichales.f__Erysipelotrichaceae.g__Solobacterium                                            | 3.586966566 |
| d__Bacteria.p__Firmicutes.c__Clostridia.o__Peptococcales.f__Peptococcaceae                                                                    | 2.539276348 |
| d__Bacteria.p__Firmicutes.c__Clostridia.o__Peptostreptococcales_Tissierellales.f__Peptostreptococcaceae                                       | 3.695951821 |
| d__Bacteria.p__Bacteroidota.c__Bacteroidia.o__Bacteroidales.f__Muribaculaceae                                                                 | 3.613542702 |
| d__Bacteria.p__Proteobacteria.c__Gammaproteobacteria.o__Burkholderiales.f__Alcaligenaceae.g__Alcaligenes                                      | 2.181265684 |
| d__Bacteria.p__Firmicutes.c__Bacilli.o__Lactobacillales.f__Carnobacteriaceae                                                                  | 3.936871737 |
| d__Bacteria.p__Proteobacteria.c__Gammaproteobacteria.o__Burkholderiales.f__Comamonadaceae                                                     | 2.832033048 |
| d__Bacteria.p__Patiscibacteria.c__Saccharimonadia.o__Saccharimonadales.f__Saccharimonadaceae.g__Candidatus_Saccharimonas                      | 3.127797269 |
| d__Bacteria.p__Firmicutes.c__Clostridia.o__Oscillospirales                                                                                    | 3.906187699 |
| d__Bacteria.p__Patiscibacteria.c__Saccharimonadia.o__Saccharimonadales.f__Saccharimonadaceae.g__TM7x                                          | 4.033439584 |
| d__Bacteria.p__Proteobacteria.c__Alphaproteobacteria.o__Caulobacteriales                                                                      | 2.050206929 |
| d__Bacteria.p__Firmicutes.c__Clostridia.o__Clostridia_UCG_014.f__Clostridia_UCG_014                                                           | 3.575291049 |
| d__Bacteria.p__Firmicutes.c__Bacilli.o__Lactobacillales.f__Carnobacteriaceae.g__Granulicatella                                                | 3.936751392 |

|                                                                                                                                         |             |
|-----------------------------------------------------------------------------------------------------------------------------------------|-------------|
| d__Bacteria.p__Proteobacteria.c__Gammaproteobacteria.o__Enterobacterales                                                                | 2.837460828 |
| d__Bacteria.p__Firmicutes.c__Negativicutes.o__Veillonellales_Selenomonadales.f__Veillonellaceae.g__Megasphaera                          | 3.670033551 |
| d__Bacteria.p__Firmicutes.c__Clostridia.o__Lachnospirales.f__Lachnospiraceae.g__Catonella                                               | 3.125647352 |
| d__Bacteria.p__Bacteroidota.c__Bacteroidia.o__Bacteroidales.f__Paludibacteraceae.g__F0058                                               | 2.847946573 |
| d__Bacteria.p__Actinobacteriota.c__Coriobacteriia                                                                                       | 3.420666635 |
| d__Bacteria.p__Proteobacteria.c__Gammaproteobacteria.o__Enterobacterales.f__Enterobacteriaceae                                          | 2.49527856  |
| d__Bacteria.p__Firmicutes.c__Clostridia.o__Lachnospirales.f__Deffluviitaleaceae.g__Deffluviitaleaceae_UCG_011                           | 2.28192745  |
| d__Bacteria.p__Firmicutes.c__Clostridia                                                                                                 | 4.77368952  |
| d__Bacteria.p__Proteobacteria.c__Gammaproteobacteria.o__Xanthomonadales.f__Xanthomonadaceae                                             | 2.630660894 |
| d__Bacteria.p__Patiscibacteria.c__Saccharimonadia.o__Saccharimonadales.f__Saccharimonadaceae                                            | 4.150878212 |
| d__Bacteria.p__Firmicutes.c__Clostridia.o__Oscillospirales.f__Ruminococcaceae.g__Ruminococcus                                           | 2.639613631 |
| d__Bacteria.p__Proteobacteria.c__Gammaproteobacteria.o__Burkholderiales.f__Burkholderiales_unclassified                                 | 3.12341604  |
| d__Bacteria.p__Firmicutes.c__Bacilli.o__Mycoplasmatales                                                                                 | 2.674949042 |
| d__Bacteria.p__Proteobacteria.c__Alphaproteobacteria.o__Rhizobiales.f__Rhizobiaceae                                                     | 2.52695818  |
| d__Bacteria.p__Firmicutes.c__Bacilli.o__RF39.f__RF39.g__RF39                                                                            | 2.429683573 |
| d__Bacteria.p__Bacteroidota.c__Bacteroidia.o__Bacteroidales.f__Prevotellaceae.g__Prevotellaceae_uncultured                              | 1.9098518   |
| d__Bacteria.p__Firmicutes.c__Clostridia.o__Lachnospirales.f__Deffluviitaleaceae                                                         | 2.28192745  |
| d__Bacteria.p__Actinobacteriota.c__Actinobacteria.o__Corynebacteriales.f__Nocardiaceae                                                  | 3.321219311 |
| d__Bacteria.p__Firmicutes.c__Clostridia.o__Lachnospirales.f__Lachnospiraceae.g__Eubacterium_eligens_group                               | 2.681000538 |
| d__Bacteria.p__Bacteroidota.c__Bacteroidia.o__Bacteroidales.f__Rikenellaceae.g__Rikenellaceae_RC9_gut_group                             | 2.50970287  |
| d__Bacteria.p__Bacteroidota.c__Bacteroidia.o__Bacteroidales.f__Muribaculaceae.g__Muribaculaceae                                         | 3.609873572 |
| d__Bacteria.p__Proteobacteria.c__Alphaproteobacteria.o__Rhizobiales                                                                     | 2.937047486 |
| d__Bacteria.p__Campilobacterota                                                                                                         | 4.012730903 |
| d__Bacteria.p__Firmicutes.c__Clostridia.o__Lachnospirales.f__Lachnospiraceae.g__Lachnospiraceae_uncultured                              | 3.553281216 |
| d__Bacteria.p__Actinobacteriota.c__Actinobacteria.o__Corynebacteriales                                                                  | 3.709854306 |
| d__Bacteria.p__Firmicutes.c__Clostridia.o__Peptostreptococcales_Tissierellales.f__Peptostreptococcaceae.g__Filifactor                   | 3.169008096 |
| d__Bacteria.p__Firmicutes.c__Clostridia.o__Lachnospirales.f__Lachnospiraceae.g__Lachnospiraceae_NK4A136_group                           | 3.270009451 |
| d__Bacteria.p__Bacteroidota.c__Bacteroidia.o__Sphingobacteriales.f__Lentimicrobiaceae.g__Lentimicrobium                                 | 2.502383531 |
| d__Bacteria.p__Firmicutes.c__Clostridia.o__Peptostreptococcales_Tissierellales.f__Peptostreptococcales_Tissierellales.g__Parvimonas     | 3.272278695 |
| d__Bacteria.p__Proteobacteria.c__Gammaproteobacteria.o__Pasteurellales.f__Pasteurellaceae.g__Actinobacillus                             | 4.004757553 |
| d__Bacteria.p__Firmicutes.c__Clostridia.o__Lachnospirales.f__Lachnospiraceae.g__Eubacterium_ruminantium_group                           | 2.853536412 |
| d__Bacteria.p__Proteobacteria.c__Gammaproteobacteria.o__Oceanospirillales.f__Halomonadaceae                                             | 3.8797074   |
| d__Bacteria.p__Bacteroidota.c__Bacteroidia.o__Bacteroidales.f__Bacteroidaceae                                                           | 3.851388474 |
| d__Bacteria.p__Proteobacteria.c__Gammaproteobacteria.o__Pseudomonadales.f__Pseudomonadaceae.g__Pseudomonas                              | 3.772791273 |
| d__Bacteria.p__Firmicutes.c__Clostridia.o__Lachnospirales.f__Lachnospiraceae.g__Lachnospiraceae_unclassified                            | 3.473733826 |
| d__Bacteria.p__Patiscibacteria.c__Gracilibacteria.o__Gracilibacteria.f__Gracilibacteria.g__Gracilibacteria                              | 2.665979957 |
| d__Bacteria.p__Fusobacteriota.c__Fusobacteriia.o__Fusobacteriales.f__Leptotrichiaceae.g__Leptotrichia                                   | 5.089214723 |
| d__Bacteria.p__Bacteroidota.c__Bacteroidia.o__Sphingobacteriales                                                                        | 2.521763858 |
| d__Bacteria.p__Firmicutes.c__Clostridia.o__Christensenellales.f__Christensenellaceae                                                    | 2.768921357 |
| d__Bacteria.p__Firmicutes.c__Clostridia.o__Peptostreptococcales_Tissierellales.f__Anaerovoracaceae.g__Amnipila                          | 2.593604175 |
| d__Bacteria.p__Firmicutes.c__Negativicutes.o__Veillonellales_Selenomonadales.f__Veillonellaceae.g__Dialister                            | 3.107195531 |
| d__Bacteria.p__Proteobacteria.c__Gammaproteobacteria.o__Burkholderiales.f__Burkholderiales_unclassified.g__Burkholderiales_unclassified | 3.12341604  |
| d__Bacteria.p__Firmicutes.c__Negativicutes.o__Acidaminococcales.f__Acidaminococcaceae                                                   | 2.687054354 |
| d__Bacteria.p__Firmicutes.c__Clostridia.o__Clostridia_UCG_014.f__Clostridia_UCG_014.g__Clostridia_UCG_014                               | 3.575291049 |
| d__Bacteria.p__Firmicutes.c__Clostridia.o__Lachnospirales.f__Lachnospiraceae                                                            | 4.549392799 |
| d__Bacteria.p__Proteobacteria.c__Gammaproteobacteria                                                                                    | 5.409524578 |



| Groups | LDA_value   | P_value     |
|--------|-------------|-------------|
| H      | 2.544195561 | 5.86E-08    |
| CC     | 3.62219215  | 5.68E-05    |
| H      | 3.058205805 | 8.97E-10    |
| H      | 3.333556801 | 1.03E-06    |
| H      | 3.310887846 | 2.28E-05    |
| H      | 3.628776555 | 0.030672536 |
| H      | 3.213266949 | 1.07E-06    |
| H      | 3.454299106 | 7.38E-11    |
| H      | 2.954745837 | 2.24E-09    |
| CC     | 2.73851522  | 0.000459512 |
| H      | 2.716438412 | 3.40E-16    |
| H      | 3.789740044 | 1.36E-05    |
| H      | 2.820651468 | 3.80E-07    |
| H      | 2.672273405 | 0.001548273 |
| CC     | 4.882008611 | 0.015364351 |
| H      | 2.705730019 | 0.000454646 |
| H      | 3.258550038 | 2.52E-08    |
| H      | 3.18734884  | 1.32E-09    |
| H      | 2.837450031 | 5.12E-12    |
| H      | 3.790152613 | 9.09E-06    |
| CC     | 3.118007819 | 0.003923325 |
| H      | 2.578202657 | 4.91E-06    |
| H      | 3.356073553 | 2.49E-09    |
| H      | 2.830689641 | 5.63E-15    |
| H      | 2.661358308 | 4.20E-07    |
| H      | 4.882860876 | 4.88E-10    |
| H      | 2.729638418 | 0.000473422 |
| H      | 4.536871524 | 0.000500929 |
| H      | 2.888313052 | 1.16E-08    |
| H      | 3.308841817 | 1.37E-08    |
| H      | 3.567880722 | 0.000201239 |
| CC     | 2.881590757 | 0.000397763 |
| H      | 2.836493974 | 6.55E-11    |
| H      | 3.872165377 | 5.29E-10    |
| H      | 2.704047237 | 3.12E-05    |
| H      | 2.871360001 | 5.02E-06    |
| CC     | 4.81369307  | 0.048740679 |
| H      | 3.625716289 | 6.73E-10    |
| H      | 2.670087398 | 0.001078223 |
| H      | 3.194897835 | 2.81E-06    |
| H      | 2.726296803 | 6.09E-05    |
| H      | 3.054895289 | 8.97E-10    |
| H      | 2.888313052 | 1.16E-08    |
| CC     | 2.736866641 | 0.026295925 |
| H      | 3.251538362 | 1.81E-09    |
| H      | 4.288894245 | 0.000857202 |
| H      | 2.888313052 | 1.16E-08    |
| H      | 3.120578555 | 0.000263827 |
| CC     | 3.086019822 | 5.55E-15    |
| H      | 2.597258712 | 0.00237272  |
| H      | 2.76316896  | 7.18E-06    |
| H      | 2.56135264  | 0.000142744 |
| H      | 2.755515167 | 2.19E-05    |
| H      | 3.193651774 | 1.59E-05    |
| H      | 2.609215303 | 6.23E-07    |
| H      | 2.891704774 | 5.69E-06    |

|    |             |             |
|----|-------------|-------------|
| H  | 3.544014821 | 6.05E-07    |
| H  | 3.595724573 | 8.65E-15    |
| CC | 3.092632107 | 1.10E-08    |
| H  | 2.784424053 | 3.60E-12    |
| H  | 4.211344374 | 4.16E-11    |
| H  | 4.422466795 | 5.13E-05    |
| H  | 2.667865243 | 7.05E-06    |
| H  | 2.888313052 | 1.16E-08    |
| H  | 2.536754336 | 0.000426367 |
| H  | 4.34659401  | 9.94E-12    |
| H  | 4.902962913 | 8.08E-11    |
| CC | 2.9904862   | 1.32E-15    |
| H  | 3.092811926 | 6.10E-06    |
| H  | 2.902582031 | 1.41E-14    |
| H  | 2.575609057 | 4.91E-06    |
| H  | 2.87925204  | 0.000547084 |
| H  | 4.130065522 | 8.55E-09    |
| H  | 2.988942843 | 1.50E-05    |
| H  | 2.779680807 | 2.59E-07    |
| H  | 2.788887573 | 1.13E-05    |
| H  | 2.938498532 | 7.23E-12    |
| H  | 2.887043344 | 6.40E-07    |
| H  | 2.520516855 | 3.09E-07    |
| H  | 4.902962913 | 8.08E-11    |
| H  | 4.062534396 | 8.77E-09    |
| H  | 4.528413932 | 6.23E-22    |
| H  | 2.909726627 | 1.16E-07    |
| H  | 2.686971723 | 0.003008185 |
| H  | 3.037193131 | 1.83E-06    |
| H  | 2.517565241 | 3.09E-07    |
| H  | 3.509268948 | 3.32E-06    |
| H  | 2.513054847 | 3.09E-07    |
| H  | 2.972462541 | 5.94E-07    |
| CC | 4.55429267  | 0.000117568 |
| H  | 2.627404946 | 1.69E-05    |
| H  | 3.513865391 | 0.000844008 |
| H  | 3.774059618 | 1.35E-19    |
| H  | 2.704818322 | 2.12E-07    |
| H  | 2.524963632 | 3.09E-07    |
| H  | 3.271147419 | 3.78E-15    |
| H  | 4.062534396 | 8.77E-09    |
| H  | 3.514285968 | 0.000793093 |
| H  | 2.778450186 | 8.35E-07    |
| H  | 2.56309021  | 1.25E-06    |
| H  | 2.614228064 | 3.90E-06    |
| H  | 2.530809476 | 6.59E-05    |
| H  | 2.599692515 | 8.04E-06    |
| H  | 2.733335271 | 0.001078223 |
| H  | 3.365654982 | 3.63E-09    |
| H  | 2.667712409 | 7.05E-06    |
| H  | 3.432696887 | 0.002519575 |
| H  | 2.800118826 | 1.89E-06    |
| H  | 2.865673096 | 0.003503316 |
| H  | 2.912028414 | 6.62E-11    |
| H  | 3.258550038 | 2.52E-08    |
| CC | 2.669246192 | 0.000319886 |
| H  | 2.941219314 | 1.30E-07    |
| H  | 3.313474492 | 5.67E-15    |

|    |             |             |
|----|-------------|-------------|
| H  | 4.130065522 | 8.55E-09    |
| H  | 3.622295557 | 2.18E-15    |
| H  | 3.308841817 | 1.37E-08    |
| H  | 2.983979591 | 2.18E-10    |
| H  | 2.70765682  | 0.000799227 |
| H  | 4.770508277 | 6.45E-09    |
| H  | 2.669972992 | 0.001387025 |
| H  | 2.851108484 | 1.35E-09    |
| CC | 4.83958285  | 0.015364351 |
| H  | 2.830241018 | 5.63E-15    |
| H  | 4.34659401  | 9.94E-12    |
| H  | 2.87879635  | 5.69E-06    |
| H  | 2.608770215 | 3.90E-06    |
| H  | 3.544014821 | 6.05E-07    |
| H  | 2.884298581 | 3.61E-06    |
| H  | 2.671781021 | 0.001387025 |
| H  | 2.91197237  | 5.06E-07    |
| H  | 2.828774259 | 5.12E-12    |
| H  | 3.452193577 | 1.03E-19    |
| CC | 2.765089044 | 0.026295925 |
| CC | 4.813714788 | 0.048740679 |
| H  | 4.307161799 | 0.000367762 |
| H  | 2.641660344 | 6.34E-06    |
| H  | 3.595724573 | 8.65E-15    |
| CC | 2.669246192 | 0.000319886 |
| H  | 2.665608265 | 4.20E-07    |
| H  | 3.414616455 | 4.44E-05    |
| CC | 3.045200027 | 5.08E-05    |
| H  | 2.83107319  | 5.63E-15    |
| H  | 2.958960304 | 2.62E-11    |
| H  | 2.892408778 | 3.81E-05    |
| H  | 2.865246069 | 1.03E-07    |
| H  | 4.241418575 | 0.003361795 |
| H  | 2.903664989 | 1.26E-09    |
| CC | 2.692755743 | 0.007693372 |
| H  | 2.916430855 | 1.16E-07    |
| H  | 2.818272031 | 3.80E-07    |
| H  | 3.497761469 | 7.72E-13    |
| H  | 2.892759218 | 5.57E-09    |
| CC | 3.62219215  | 5.68E-05    |
| H  | 3.208661674 | 4.59E-13    |
| H  | 2.514573359 | 3.02E-05    |
| CC | 3.092632107 | 1.10E-08    |
| H  | 3.595724573 | 8.65E-15    |
| CC | 4.878685629 | 0.000131777 |
| H  | 2.89467189  | 1.07E-06    |
| H  | 3.24866255  | 3.78E-15    |
| H  | 2.867650744 | 0.002466342 |
| H  | 3.34179421  | 7.24E-10    |
| H  | 3.194547814 | 1.18E-10    |
| CC | 3.069973981 | 0.034585397 |
| H  | 2.663628627 | 5.38E-07    |
| H  | 3.045584342 | 1.79E-11    |
| H  | 3.529162819 | 1.78E-10    |
| H  | 3.291341281 | 4.19E-06    |
| H  | 3.232293068 | 0.010065566 |
| H  | 2.865246069 | 1.03E-07    |
| CC | 3.06978808  | 0.03385413  |

|    |             |             |
|----|-------------|-------------|
| H  | 2.562745625 | 1.09E-07    |
| H  | 3.158989106 | 0.002006267 |
| H  | 2.88705667  | 5.30E-06    |
| H  | 2.530809476 | 6.59E-05    |
| H  | 2.705730019 | 0.000454646 |
| H  | 2.703460695 | 4.43E-06    |
| H  | 3.189777449 | 4.81E-06    |
| H  | 4.066526893 | 9.84E-07    |
| CC | 3.1163832   | 0.003923325 |
| H  | 3.409819445 | 4.85E-06    |
| H  | 2.529452988 | 0.000203744 |
| CC | 2.935619565 | 0.001281256 |
| H  | 2.905198728 | 1.16E-07    |
| CC | 2.984033146 | 1.32E-15    |
| H  | 2.811020189 | 5.12E-12    |
| H  | 3.639180776 | 0.001309513 |
| H  | 3.180550787 | 4.81E-06    |
| H  | 2.989237283 | 1.50E-05    |
| H  | 2.504748066 | 5.26E-05    |
| H  | 3.161003754 | 3.10E-09    |
| H  | 3.338016943 | 7.24E-10    |
| CC | 2.885570405 | 3.60E-07    |
| H  | 3.308841817 | 1.37E-08    |
| H  | 3.148496938 | 4.05E-06    |
| H  | 3.088412139 | 1.78E-07    |
| H  | 2.97928156  | 1.80E-08    |
| H  | 3.018367927 | 9.53E-08    |
| H  | 2.941886565 | 7.23E-12    |
| H  | 2.950764496 | 6.87E-11    |
| H  | 3.609263759 | 1.47E-11    |
| H  | 2.702657753 | 4.28E-09    |
| CC | 3.62219215  | 5.68E-05    |
| H  | 3.453972093 | 7.38E-11    |
| H  | 3.452877735 | 1.03E-19    |
| H  | 3.180500264 | 5.41E-07    |
| H  | 2.810752448 | 3.80E-07    |
| CC | 4.560091457 | 7.53E-05    |
| H  | 2.846115772 | 4.72E-12    |
| H  | 2.661018746 | 4.20E-07    |
| H  | 2.920589876 | 0.000799992 |
| H  | 2.679523278 | 1.29E-08    |
| CC | 2.928104398 | 0.001281256 |
| H  | 2.577910193 | 4.91E-06    |
| H  | 2.865246069 | 1.03E-07    |
| H  | 3.785757013 | 1.01E-05    |
| H  | 4.53772341  | 0.000517301 |

| Supplementary table S7. The corresponding LDA value and p value of microbial community gene function for samples in the discovery cohort |                 |        |           |         |
|------------------------------------------------------------------------------------------------------------------------------------------|-----------------|--------|-----------|---------|
| Biomaker_names                                                                                                                           | Logarithm value | Groups | LDA_value | P_value |
| L1_Metabolism.L2_Glycan_biosynthesis_and_metabolism.L3_Glycosylphosphatidylinositol_GPI_anchor_biosynthesis                              | 0               |        |           | -       |
| L1_Metabolism.L2_Lipid_metabolism.L3_Sphingolipid_metabolism                                                                             | 3.424984742     |        |           | -       |
| L1_Metabolism.L2_Metabolism_of_cofactors_and_vitamins.L3_Riboflavin_metabolism                                                           | 4.048603752     |        |           | -       |
| L1_Metabolism.L2_Nucleotide_metabolism.L3_Purine_metabolism                                                                              | 3.994368667     |        |           | -       |
| L1_Metabolism.L2_Amino_acid_metabolism.L3_Cysteine_and_methionine_metabolism                                                             | 4.141796991     |        |           | -       |
| L1_Metabolism.L2_Lipid_metabolism.L3_Fatty_acid_degradation                                                                              | 3.577130545     |        |           | -       |
| L1_Environmental_Information_Processing.L2_Membrane_transport.L3_Bacterial_secretion_system                                              | 4.026748259     |        |           | -       |
| L1_Metabolism.L2_Metabolism_of_cofactors_and_vitamins.L3_Porphyrin_and_chlorophyll_metabolism                                            | 3.900534524     |        |           | -       |
| L1_Metabolism.L2_Biosynthesis_of_other_secondary_metabolites.L3_Penicillin_and_cephalosporin_biosynthesis                                | 2.736786849     |        |           | -       |
| L1_Metabolism.L2_Xenobiotics_biodegradation_and_metabolism.L3_Drug_metabolism_other_enzymes                                              | 4.111133221     |        |           | -       |
| L1_Cellular_Processes.L2_Cell_growth_and_death.L3_Apoptosis                                                                              | 2.761205409     |        |           | -       |
| L1_Metabolism.L2_Metabolism_of_terpenoids_and_polyketides.L3_Biosynthesis_of_siderophore_group_nonribosomal_peptides                     | 2.9341534       |        |           | -       |
| L1_Metabolism.L2_Amino_acid_metabolism.L3_Histidine_metabolism                                                                           | 3.979603121     |        |           | -       |
| L1_Metabolism.L2_Amino_acid_metabolism.L3_Valine_leucine_and_isoleucine_degradation                                                      | 3.600547785     |        |           | -       |
| L1_Metabolism.L2_Metabolism_of_terpenoids_and_polyketides.L3_Limonene_and_pinene_degradation                                             | 2.861655126     |        |           | -       |
| L1_Metabolism.L2_Amino_acid_metabolism.L3_Glycine_serine_and_threonine_metabolism                                                        | 4.054501045     |        |           | -       |
| L1_Metabolism.L2_Metabolism_of_terpenoids_and_polyketides.L3_Terpenoid_backbone_biosynthesis                                             | 4.151101569     |        |           | -       |
| L1_Metabolism.L2_Glycan_biosynthesis_and_metabolism.L3_N_Glycan_biosynthesis                                                             | 2.842134376     |        |           | -       |
| L1_Metabolism.L2_Carbohydrate_metabolism.L3_Propanoate_metabolism                                                                        | 3.829394769     |        |           | -       |
| L1_Metabolism.L2_Lipid_metabolism.L3_Biosynthesis_of_unsaturated_fatty_acids                                                             | 3.540351519     |        |           | -       |
| L1_Metabolism.L2_Biosynthesis_of_other_secondary_metabolites.L3_Betalain_biosynthesis                                                    | 1.53208283      |        |           | -       |
| L1_Genetic_Information_Processing.L2_Translation.L3_Aminoacyl_tRNA_biosynthesis                                                          | 4.274631072     |        |           | -       |
| L1_Cellular_Processes.L2_Cell_growth_and_death.L3_Cell_cycle_Caulobacter                                                                 | 4.224830759     |        |           | -       |
| L1_Metabolism.L2_Xenobiotics_biodegradation_and_metabolism.L3_Xylene_degradation                                                         | 2.467195301     |        |           | -       |
| L1_Metabolism.L2_Xenobiotics_biodegradation_and_metabolism.L3_Chlorocyclohexane_and_chlorobenzene_degradation                            | 2.414770755     |        |           | -       |
| L1_Metabolism.L2_Metabolism_of_cofactors_and_vitamins.L3_Nicotinate_and_nicotinamide_metabolism                                          | 4.095193168     |        |           | -       |
| L1_Metabolism.L2_Metabolism_of_other_amino_acids.L3_D_Alanine_metabolism                                                                 | 4.298644744     | H      | 2.809955  | 0.0028  |
| L1_Metabolism.L2_Xenobiotics_biodegradation_and_metabolism.L3_Nitrotoluene_degradation                                                   | 3.271989313     |        |           | -       |
| L1_Metabolism.L2_Lipid_metabolism.L3_Steroid_hormone_biosynthesis                                                                        | 2.25215489      |        |           | -       |
| L1_Metabolism.L2_Xenobiotics_biodegradation_and_metabolism.L3_Caprolactam_degradation                                                    | 2.507657618     |        |           | -       |
| L1_Metabolism.L2_Metabolism_of_terpenoids_and_polyketides.L3_Biosynthesis_of_type_II_polyketide_products                                 | 0               |        |           | -       |
| L1_Metabolism.L2_Metabolism_of_other_amino_acids.L3_Taurine_and_hypotaurine_metabolism                                                   | 3.888381097     |        |           | -       |
| L1_Cellular_Processes.L2_Cellular_community_eukaryotes.L3_Focal_adhesion                                                                 | 0               |        |           | -       |
| L1_Metabolism.L2_Metabolism_of_terpenoids_and_polyketides.L3_Zeatin_biosynthesis                                                         | 3.909430499     |        |           | -       |
| L1_Genetic_Information_Processing.L2_Replication_and_repair.L3_DNA_replication                                                           | 4.143179904     |        |           | -       |
| L1_Metabolism.L2_Biosynthesis_of_other_secondary_metabolites.L3_Flavonoid_biosynthesis                                                   | 2.562208652     |        |           | -       |
| L1_Genetic_Information_Processing.L2_Translation.L3_Ribosome_biogenesis_in_eukaryotes                                                    | 2.896791303     |        |           | -       |
| L1_Environmental_Information_Processing.L2_Signal_transduction.L3_Two_component_system                                                   | 3.398596432     |        |           | -       |
| L1_Human_Diseases.L2_Infectious_diseases_Parasitic.L3_Toxoplasmosis                                                                      | 0.723306361     |        |           | -       |
| L1_Metabolism.L2_Nucleotide_metabolism.L3_Pyrimidine_metabolism                                                                          | 4.112468778     |        |           | -       |
| L1_Metabolism.L2_Amino_acid_metabolism.L3_Arginine_and_proline_metabolism                                                                | 3.792266305     |        |           | -       |
| L1_Metabolism.L2_Carbohydrate_metabolism.L3_Pyruvate_metabolism                                                                          | 4.092249337     |        |           | -       |
| L1_Metabolism.L2_Metabolism_of_cofactors_and_vitamins.L3_Folate_biosynthesis                                                             | 4.195017053     | CC     | 2.615679  | 0.0002  |
| L1_Metabolism.L2_Amino_acid_metabolism.L3_Valine_leucine_and_isoleucine_biosynthesis                                                     | 4.330181005     | H      | 2.641098  | 0.001   |
| L1_Metabolism.L2_Xenobiotics_biodegradation_and_metabolism.L3_Fluorobenzoate_degradation                                                 | 2.088919189     |        |           | -       |
| L1_Cellular_Processes.L2_Transport_and_catabolism.L3_Endocytosis                                                                         | 0               |        |           | -       |
| L1_Metabolism.L2_Xenobiotics_biodegradation_and_metabolism.L3_Dioxin_degradation                                                         | 3.181465735     |        |           | -       |
| L1_Metabolism.L2_Amino_acid_metabolism.L3_Tyrosine_metabolism                                                                            | 3.499635799     |        |           | -       |
| L1_Human_Diseases.L2_Infectious_diseases_Bacterial.L3_Vibrio_cholerae_infection                                                          | 2.344361963     |        |           | -       |
| L1_Human_Diseases.L2_Infectious_diseases_Bacterial.L3_Bacterial_invasion_of_epithelial_cells                                             | 1.605443406     |        |           | -       |
| L1_Metabolism.L2_Xenobiotics_biodegradation_and_metabolism.L3_Styrene_degradation                                                        | 3.236607167     |        |           | -       |
| L1_Metabolism.L2_Metabolism_of_terpenoids_and_polyketides.L3_Geraniol_degradation                                                        | 3.162760657     |        |           | -       |
| L1_Organismal_Systems.L2_Endocrine_system.L3_Insulin_signaling_pathway                                                                   | 2.963224537     |        |           | -       |
| L1_Metabolism.L2_Xenobiotics_biodegradation_and_metabolism.L3_Metabolism_of_xenobiotics_by_cytochrome_P450                               | 3.259586523     | CC     | 2.606198  | 0.0006  |
| L1_Metabolism.L2_Glycan_biosynthesis_and_metabolism.L3_Lipopolysaccharide_biosynthesis                                                   | 4.269012715     | CC     | 2.963771  | 0.0376  |

|                                                                                                                       |             |    |          |        |
|-----------------------------------------------------------------------------------------------------------------------|-------------|----|----------|--------|
| L1_Metabolism.L2_Biosynthesis_of_other_secondary_metabolites.L3_Tropane_piperidine_and_pyridine_alkaloid_biosynthesis | 3.671078792 |    |          | -      |
| L1_Metabolism.L2_Metabolism_of_cofactors_and_vitamins.L3_One_carbon_pool_by_folate                                    | 4.302182726 |    |          | -      |
| L1_Metabolism.L2_Energy_metabolism.L3_Methane_metabolism                                                              | 3.654051011 |    |          | -      |
| L1_Genetic_Information_Processing.L2_Replication_and_repair.L3_Homologous_recombination                               | 4.238217884 |    |          | -      |
| L1_Organismal_Systems.L2_Immune_system.L3_NOD_like_receptor_signaling_pathway                                         | 2.847595937 |    |          | -      |
| L1_Metabolism.L2_Metabolism_of_other_amino_acids.L3_D_Arginine_and_D_ornithine_metabolism                             | 3.46112072  |    |          | -      |
| L1_Genetic_Information_Processing.L2_Replication_and_repair.L3_Base_excision_repair                                   | 4.030186007 |    |          | -      |
| L1_Human_Diseases.L2_Immune_diseases.L3_Systemic_lupus_erythematosus                                                  | 2.285430197 |    |          | -      |
| L1_Metabolism.L2_Metabolism_of_terpenoids_and_polyketides.L3_Sesquiterpenoid_and_triterpenoid_biosynthesis            | 0           |    |          | -      |
| L1_Metabolism.L2_Carbohydrate_metabolism.L3_Pentose_phosphate_pathway                                                 | 4.200880392 | H  | 2.582621 | 0.0006 |
| L1_Metabolism.L2_Biosynthesis_of_other_secondary_metabolites.L3_Isoflavonoid_biosynthesis                             | 0           |    |          | -      |
| L1_Metabolism.L2_Amino_acid_metabolism.L3_Phenylalanine_metabolism                                                    | 3.451162453 |    |          | -      |
| L1_Metabolism.L2_Energy_metabolism.L3_Photosynthesis_antenna_proteins                                                 | 0.509686311 |    |          | -      |
| L1_Metabolism.L2_Metabolism_of_cofactors_and_vitamins.L3_Biotin_metabolism                                            | 4.189983918 | CC | 2.763653 | 0.013  |
| L1_Genetic_Information_Processing.L2_Folding_sorting_and_degradation.L3_Protein_processing_in_endoplasmic_reticulum   | 2.462317189 |    |          | -      |
| L1_Genetic_Information_Processing.L2_Folding_sorting_and_degradation.L3_Proteasome                                    | 1.852245449 |    |          | -      |
| L1_Metabolism.L2_Amino_acid_metabolism.L3_Phenylalanine_tyrosine_and_tryptophan_biosynthesis                          | 4.11120093  |    |          | -      |
| L1_Metabolism.L2_Carbohydrate_metabolism.L3_C5_Branched_dibasic_acid_metabolism                                       | 4.224871894 |    |          | -      |
| L1_Metabolism.L2_Metabolism_of_terpenoids_and_polyketides.L3_Carotenoid_biosynthesis                                  | 2.495921848 |    |          | -      |
| L1_Metabolism.L2_Carbohydrate_metabolism.L3_Amino_sugar_and_nucleotide_sugar_metabolism                               | 4.014186316 |    |          | -      |
| L1_Organismal_Systems.L2_Digestive_system.L3_Protein_digestion_and_absorption                                         | 2.832987533 |    |          | -      |
| L1_Metabolism.L2_Energy_metabolism.L3_Sulfur_metabolism                                                               | 4.008208093 |    |          | -      |
| L1_Genetic_Information_Processing.L2_Translation.L3_RNA_transport                                                     | 2.681058872 |    |          | -      |
| L1_Metabolism.L2_Carbohydrate_metabolism.L3_Butanoate_metabolism                                                      | 3.842622393 |    |          | -      |
| L1_Metabolism.L2_Xenobiotics_biodegradation_and_metabolism.L3_Aminobenzoate_degradation                               | 3.195090236 |    |          | -      |
| L1_Metabolism.L2_Energy_metabolism.L3_Nitrogen_metabolism                                                             | 3.841114914 |    |          | -      |
| L1_Metabolism.L2_Metabolism_of_other_amino_acids.L3_Glutathione_metabolism                                            | 3.903322386 |    |          | -      |
| L1_Metabolism.L2_Energy_metabolism.L3_Carbon_fixation_in_photosynthetic_organisms                                     | 4.237736612 |    |          | -      |
| L1_Human_Diseases.L2_Infectious_diseases_Bacterial.L3_Staphylococcus_aureus_infection                                 | 2.66471718  |    |          | -      |
| L1_Metabolism.L2_Metabolism_of_cofactors_and_vitamins.L3_Vitamin_B6_metabolism                                        | 4.08864834  |    |          | -      |
| L1_Metabolism.L2_Xenobiotics_biodegradation_and_metabolism.L3_Bisphenol_degradation                                   | 2.915728117 |    |          | -      |
| L1_Metabolism.L2_Carbohydrate_metabolism.L3_Inositol_phosphate_metabolism                                             | 3.347967523 |    |          | -      |
| L1_Metabolism.L2_Metabolism_of_other_amino_acids.L3_D_Glutamine_and_D_glutamate_metabolism                            | 4.399546844 |    |          | -      |
| L1_Cellular_Processes.L2_Cell_growth_and_death.L3_Meiosis_yeast                                                       | 1.364913779 |    |          | -      |
| L1_Environmental_Information_Processing.L2_Membrane_transport.L3_ABC_transporters                                     | 3.861135632 |    |          | -      |
| L1_Cellular_Processes.L2_Cellular_community_prokaryotes.L3_Biofilm_formation_Vibrio_cholerae                          | 3.297137674 |    |          | -      |
| L1_Metabolism.L2_Lipid_metabolism.L3_Linoleic_acid_metabolism                                                         | 3.198954173 |    |          | -      |
| L1_Metabolism.L2_Glycan_biosynthesis_and_metabolism.L3_Peptidoglycan_biosynthesis                                     | 4.317092469 |    |          | -      |
| L1_Genetic_Information_Processing.L2_Folding_sorting_and_degradation.L3_Protein_export                                | 4.207464598 |    |          | -      |
| L1_Metabolism.L2_Glycan_biosynthesis_and_metabolism.L3_Other_types_of_O_glycan_biosynthesis                           | 1.268640971 |    |          | -      |
| L1_Metabolism.L2_Carbohydrate_metabolism.L3_Galactose_metabolism                                                      | 3.913464031 | H  | 2.675253 | 0.013  |
| L1_Metabolism.L2_Xenobiotics_biodegradation_and_metabolism.L3_Toluene_degradation                                     | 3.328403238 |    |          | -      |
| L1_Genetic_Information_Processing.L2_Folding_sorting_and_degradation.L3_Sulfur_relay_system                           | 3.973030706 |    |          | -      |
| L1_Metabolism.L2_Metabolism_of_terpenoids_and_polyketides.L3_Biosynthesis_of_vancomycin_group_antibiotics             | 4.357672237 | CC | 2.937801 | 0.0118 |
| L1_Human_Diseases.L2_Cardiovascular_diseases.L3_Hypertrophic_cardiomyopathy_HCM                                       | 0.533754533 |    |          | -      |
| L1_Metabolism.L2_Glycan_biosynthesis_and_metabolism.L3_Glycosphingolipid_biosynthesis_lacto_and_neolacto_series       | 0           |    |          | -      |
| L1_Genetic_Information_Processing.L2_Transcription.L3_RNA_polymerase                                                  | 3.913898664 |    |          | -      |
| L1_Metabolism.L2_Amino_acid_metabolism.L3_Alanine_aspartate_and_glutamate_metabolism                                  | 4.186476829 |    |          | -      |
| L1_Metabolism.L2_Xenobiotics_biodegradation_and_metabolism.L3_Benzoate_degradation                                    | 3.150901577 |    |          | -      |
| L1_Human_Diseases.L2_Infectious_diseases_Bacterial.L3_Shigellosis                                                     | 0           |    |          | -      |
| L1_Metabolism.L2_Carbohydrate_metabolism.L3_Glycolysis_Gluconeogenesis                                                | 4.070652519 |    |          | -      |
| L1_Metabolism.L2_Amino_acid_metabolism.L3_Lysine_biosynthesis                                                         | 4.191698918 |    |          | -      |
| L1_Metabolism.L2_Lipid_metabolism.L3_Synthesis_and_degradation_of_ketone_bodies                                       | 3.559495658 | H  | 2.705307 | 0.0016 |
| L1_Human_Diseases.L2_Infectious_diseases_Parasitic.L3_Chagas_disease_American_trypanosomiasis                         | 1.211584122 |    |          | -      |
| L1_Metabolism.L2_Energy_metabolism.L3_Oxidative_phosphorylation                                                       | 3.734662689 |    |          | -      |
| L1_Metabolism.L2_Metabolism_of_cofactors_and_vitamins.L3_Ubiquinone_and_other_terpenoid_quinone_biosynthesis          | 3.790157976 |    |          | -      |
| L1_Organismal_Systems.L2_Endocrine_system.L3_Renin_angiotensin_system                                                 | 0           |    |          | -      |
| L1_Metabolism.L2_Energy_metabolism.L3_Carbon_fixation_pathways_in_prokaryotes                                         | 4.079524471 |    |          | -      |

|                                                                                                                  |             |    |          |        |
|------------------------------------------------------------------------------------------------------------------|-------------|----|----------|--------|
| L1_Metabolism.L2_Xenobiotics_biodegradation_and_metabolism.L3_Ethylbenzene_degradation                           | 3.141149048 |    |          | -      |
| L1_Human_Diseases.L2_Infectious_diseases_Parasitic.L3_African_trypanosomiasis                                    | 1.91843405  |    |          | -      |
| L1_Metabolism.L2_Metabolism_of_other_amino_acids.L3_beta_Alanine_metabolism                                      | 3.683322678 |    |          | -      |
| L1_Metabolism.L2_Lipid_metabolism.L3_Glycerophospholipid_metabolism                                              | 3.825801111 |    |          | -      |
| L1_Metabolism.L2_Carbohydrate_metabolism.L3_Fructose_and_mannose_metabolism                                      | 3.91976181  |    |          | -      |
| L1_Metabolism.L2_Lipid_metabolism.L3_Secondary_bile_acid_biosynthesis                                            | 2.98735526  |    |          | -      |
| L1_Metabolism.L2_Metabolism_of_other_amino_acids.L3_Cyanoamino_acid_metabolism                                   | 3.758808352 | CC | 2.924545 | 0.0034 |
| L1_Genetic_Information_Processing.L2_Transcription.L3_Spliceosome                                                | 1.706480795 |    |          | -      |
| L1_Metabolism.L2_Lipid_metabolism.L3_Glycerolipid_metabolism                                                     | 3.602793709 |    |          | -      |
| L1_Metabolism.L2_Metabolism_of_other_amino_acids.L3_Phosphonate_and_phosphinate_metabolism                       | 3.291016964 |    |          | -      |
| L1_Genetic_Information_Processing.L2_Replication_and_repair.L3_Non_homologous_end_joining                        | 1.659959289 |    |          | -      |
| L1_Metabolism.L2_Lipid_metabolism.L3_Primary_bile_acid_biosynthesis                                              | 2.10784858  |    |          | -      |
| L1_Metabolism.L2_Biosynthesis_of_other_secondary_metabolites.L3_Streptomycin_biosynthesis                        | 4.193578543 |    |          | -      |
| L1_Metabolism.L2_Carbohydrate_metabolism.L3_Glyoxylate_and_dicarboxylate_metabolism                              | 3.750259745 |    |          | -      |
| L1_Organismal_Systems.L2_Excretory_system.L3_Vasopressin_regulated_water_reabsorption                            | 0           |    |          | -      |
| L1_Cellular_Processes.L2_Cell_motility.L3_Flagellar_assembly                                                     | 3.29252061  |    |          | -      |
| L1_Metabolism.L2_Xenobiotics_biodegradation_and_metabolism.L3_Naphthalene_degradation                            | 2.390523827 |    |          | -      |
| L1_Metabolism.L2_Carbohydrate_metabolism.L3_Ascorbate_and_aldarate_metabolism                                    | 3.402146255 |    |          | -      |
| L1_Metabolism.L2_Xenobiotics_biodegradation_and_metabolism.L3_Chloroalkane_and_chloroalkene_degradation          | 3.411630747 |    |          | -      |
| L1_Cellular_Processes.L2_Cell_motility.L3_Bacterial_chemotaxis                                                   | 3.610892368 |    |          | -      |
| L1_Environmental_Information_Processing.L2_Membrane_transport.L3_Phosphotransferase_system_PTS                   | 3.702208516 |    |          | -      |
| L1_Metabolism.L2_Carbohydrate_metabolism.L3_Citrate_cycle_TCA_cycle                                              | 4.075022678 |    |          | -      |
| L1_Metabolism.L2_Metabolism_of_cofactors_and_vitamins.L3_Pantothenate_and_CoA_biosynthesis                       | 4.249881642 |    |          | -      |
| L1_Metabolism.L2_Lipid_metabolism.L3_Fatty_acid_biosynthesis                                                     | 4.26604509  |    |          | -      |
| L1_Cellular_Processes.L2_Transport_and_catabolism.L3_Peroxisome                                                  | 3.44000292  |    |          | -      |
| L1_Genetic_Information_Processing.L2_Replication_and_repair.L3_Nucleotide_excision_repair                        | 3.929651114 |    |          | -      |
| L1_Metabolism.L2_Lipid_metabolism.L3_Steroid_biosynthesis                                                        | 1.395944208 |    |          | -      |
| L1_Metabolism.L2_Glycan_biosynthesis_and_metabolism.L3_Glycosaminoglycan_degradation                             | 3.605634766 |    |          | -      |
| L1_Metabolism.L2_Amino_acid_metabolism.L3_Tryptophan_metabolism                                                  | 3.341828701 |    |          | -      |
| L1_Metabolism.L2_Amino_acid_metabolism.L3_Lysine_degradation                                                     | 3.244733287 |    |          | -      |
| L1_Metabolism.L2_Metabolism_of_other_amino_acids.L3_Selenocompound_metabolism                                    | 4.074328487 |    |          | -      |
| L1_Human_Diseases.L2_Infectious_diseases_Bacterial.L3_Epithelial_cell_signaling_in_Helicobacter_pylori_infection | 3.184145184 |    |          | -      |
| L1_Metabolism.L2_Xenobiotics_biodegradation_and_metabolism.L3_Polycyclic_aromatic_hydrocarbon_degradation        | 1.582526844 |    |          | -      |
| L1_Metabolism.L2_Metabolism_of_cofactors_and_vitamins.L3_Lipoic_acid_metabolism                                  | 4.130742797 |    |          | -      |
| L1_Metabolism.L2_Carbohydrate_metabolism.L3_Starch_and_sucrose_metabolism                                        | 3.901137421 |    |          | -      |
| L1_Genetic_Information_Processing.L2_Translation.L3_Ribosome                                                     | 4.25999274  |    |          | -      |
| L1_Genetic_Information_Processing.L2_Folding_sorting_and_degradation.L3_RNA_degradation                          | 3.828354083 |    |          | -      |
| L1_Metabolism.L2_Metabolism_of_cofactors_and_vitamins.L3_Retinol_metabolism                                      | 2.972164085 |    |          | -      |
| L1_Genetic_Information_Processing.L2_Replication_and_repair.L3_Mismatch_repair                                   | 4.278454094 |    |          | -      |
| L1_Metabolism.L2_Xenobiotics_biodegradation_and_metabolism.L3_Atrazine_degradation                               | 2.428096345 |    |          | -      |
| L1_Organismal_Systems.L2_Environmental_adaptation.L3_Plant_pathogen_interaction                                  | 3.227654141 |    |          | -      |
| L1_Metabolism.L2_Metabolism_of_terpenoids_and_polyketides.L3_Biosynthesis_of_ansamycins                          | 4.615876441 | H  | 3.365285 | 0.009  |
| L1_Metabolism.L2_Metabolism_of_terpenoids_and_polyketides.L3_Biosynthesis_of_type_II_polyketide_backbone         | 0           |    |          | -      |
| L1_Metabolism.L2_Energy_metabolism.L3_Photosynthesis                                                             | 3.691097017 | CC | 2.837926 | 0.0433 |
| L1_Metabolism.L2_Glycan_biosynthesis_and_metabolism.L3_Various_types_of_N_glycan_biosynthesis                    | 0           |    |          | -      |
| L1_Metabolism.L2_Glycan_biosynthesis_and_metabolism.L3_Other_glycan_degradation                                  | 4.041557513 |    |          | -      |
| L1_Metabolism.L2_Metabolism_of_cofactors_and_vitamins.L3_Thiamine_metabolism                                     | 4.162356363 |    |          | -      |
| L1_Human_Diseases.L2_Infectious_diseases_Parasitic.L3_Amoebiasis                                                 | 1.922963303 |    |          | -      |
| L1_Metabolism.L2_Carbohydrate_metabolism.L3_Pentose_and_glucuronate_interconversions                             | 3.545603452 |    |          | -      |

| Supplementary Table S8. the corresponding output value and POD value of each optimal microbial marker in the discovery cohort |                           |                       |                           |                          |                       |                           |                        |                      |       |             |             |
|-------------------------------------------------------------------------------------------------------------------------------|---------------------------|-----------------------|---------------------------|--------------------------|-----------------------|---------------------------|------------------------|----------------------|-------|-------------|-------------|
| row names(Data)                                                                                                               | OTU10<br>(Alloprevotella) | OTU26<br>(Prevotella) | OTU71<br>(Alloprevotella) | OTU29<br>(Porphyromonas) | OTU5<br>(Haemophilus) | OTU67<br>(Alloprevotella) | OTU252<br>(Prevotella) | OTU34<br>(Halomonas) | group | POD(H)      | POD(CC)     |
| H002                                                                                                                          | 0.071665                  | 0.006821              | 0.005284                  | 0.004889                 | 0.036033              | 0.001428                  | 0.001498               | 1.30E-04             | H     | 1           | 0           |
| H003                                                                                                                          | 0.060622                  | 0.014649              | 0.011264                  | 0                        | 0.05031               | 2.98E-04                  | 0.008751               | 6.75E-04             | H     | 0.99719888  | 0.00280112  |
| H004                                                                                                                          | 0.041554                  | 0.018422              | 2.92E-04                  | 4.34E-04                 | 0.060625              | 0.005587                  | 1.91E-04               | 4.10E-05             | H     | 0.994708995 | 0.005291005 |
| H005                                                                                                                          | 0.044963                  | 6.14E-04              | 0.003092                  | 0.001462                 | 0.00428               | 6.99E-04                  | 8.90E-05               | 6.90E-05             | H     | 0.881081081 | 0.118918919 |
| H008                                                                                                                          | 0.058069                  | 0.012039              | 0.028048                  | 0                        | 0.010553              | 3.59E-04                  | 1.81E-04               | 2.00E-05             | H     | 0.989041096 | 0.010958904 |
| H009                                                                                                                          | 0.058344                  | 0.029502              | 0.001166                  | 6.23E-04                 | 0.020222              | 0.013006                  | 0.010278               | 2.90E-05             | H     | 1           | 0           |
| H010                                                                                                                          | 0.10336                   | 0.014299              | 0.007075                  | 0                        | 0.039821              | 1.44E-04                  | 0.018926               | 0.00134              | H     | 0.988571429 | 0.011428571 |
| H011                                                                                                                          | 0.090771                  | 0.011081              | 0.002338                  | 0.002158                 | 0.011217              | 0.003978                  | 0.022857               | 3.09E-04             | H     | 1           | 0           |
| H013                                                                                                                          | 0.057774                  | 0.004309              | 4.43E-04                  | 0.003528                 | 0.019186              | 0.003279                  | 0                      | 0                    | H     | 0.986772487 | 0.013227513 |
| H015                                                                                                                          | 0.051915                  | 0.01719               | 0.002372                  | 1.67E-04                 | 0.043167              | 0.008916                  | 2.10E-05               | 2.10E-05             | H     | 0.982905983 | 0.017094017 |
| H017                                                                                                                          | 0.01752                   | 0.010883              | 3.28E-04                  | 0.008386                 | 0.037434              | 0.002931                  | 2.90E-05               | 3.40E-05             | H     | 0.994609164 | 0.005390836 |
| H019                                                                                                                          | 0.093084                  | 0.013658              | 0.019168                  | 0.00248                  | 0.014381              | 5.40E-04                  | 2.62E-04               | 0                    | H     | 1           | 0           |
| H020                                                                                                                          | 0.08763                   | 0.025215              | 0.005237                  | 0.005044                 | 0.028522              | 0.001004                  | 0.001066               | 1.13E-04             | H     | 0.997093023 | 0.002906977 |
| H021                                                                                                                          | 0.027945                  | 0.004593              | 0.004129                  | 0.050491                 | 0.007704              | 0.004517                  | 3.20E-04               | 2.69E-04             | H     | 0.997245179 | 0.002754821 |
| H023                                                                                                                          | 0.0468                    | 0.010992              | 0.010784                  | 0.001667                 | 0.02896               | 0.018733                  | 0                      | 0                    | H     | 1           | 0           |
| H024                                                                                                                          | 0.046669                  | 0.005521              | 8.30E-05                  | 1.81E-04                 | 0.006796              | 0.00149                   | 0                      | 0                    | H     | 0.712365591 | 0.287634409 |
| H025                                                                                                                          | 0.034724                  | 0.019556              | 2.40E-04                  | 0.007158                 | 0.078645              | 0.007922                  | 7.10E-05               | 6.40E-05             | H     | 1           | 0           |
| H027                                                                                                                          | 0.026283                  | 0.03411               | 0.004446                  | 3.00E-05                 | 0.03487               | 0                         | 0.006367               | 1.63E-04             | H     | 0.95890411  | 0.04109589  |
| H028                                                                                                                          | 0.03164                   | 0.016785              | 0.02419                   | 4.60E-04                 | 0.026763              | 0.001111                  | 0                      | 0                    | H     | 0.939153439 | 0.060846561 |
| H029                                                                                                                          | 0.088287                  | 0.011089              | 0.012583                  | 0.007407                 | 0.051103              | 1.10E-04                  | 0.002168               | 1.47E-04             | H     | 0.997175141 | 0.002824859 |
| H032                                                                                                                          | 0.022348                  | 0.004024              | 0.00398                   | 7.87E-04                 | 0.003152              | 0.006662                  | 5.49E-04               | 2.18E-04             | H     | 0.89258312  | 0.10741688  |
| H034                                                                                                                          | 0.013498                  | 0.009553              | 0.006517                  | 0.001094                 | 0.033579              | 0.001381                  | 0                      | 0                    | H     | 0.965517241 | 0.034482759 |
| H035                                                                                                                          | 0.081266                  | 0.042442              | 2.08E-04                  | 0.02348                  | 0.068106              | 0.017323                  | 0.003                  | 1.62E-04             | H     | 0.979643766 | 0.020356234 |
| H036                                                                                                                          | 0.039921                  | 0.013946              | 0.001616                  | 0.00275                  | 0.023979              | 0.001867                  | 1.11E-04               | 0                    | H     | 1           | 0           |
| H039                                                                                                                          | 0.074109                  | 0.009111              | 0.006796                  | 0                        | 0.024271              | 1.40E-05                  | 7.20E-05               | 0                    | H     | 0.959537572 | 0.040462428 |
| H040                                                                                                                          | 0.048462                  | 0.007237              | 0.049194                  | 9.99E-04                 | 0.033032              | 5.76E-04                  | 3.12E-04               | 3.49E-04             | H     | 1           | 0           |
| H041                                                                                                                          | 0.030114                  | 8.65E-04              | 7.43E-04                  | 3.30E-05                 | 0.003457              | 1.27E-04                  | 2.30E-04               | 3.40E-05             | H     | 0.802197802 | 0.197802198 |
| H044                                                                                                                          | 0.007523                  | 0.003144              | 2.21E-04                  | 0.002933                 | 0.057711              | 9.10E-05                  | 1.92E-04               | 1.26E-04             | H     | 0.869942197 | 0.130057803 |
| H048                                                                                                                          | 0.004324                  | 0.025184              | 0.007673                  | 0.006432                 | 0.07616               | 6.52E-04                  | 1.31E-04               | 2.13E-04             | H     | 0.865168539 | 0.134831461 |
| H049                                                                                                                          | 0.014518                  | 0.012371              | 2.79E-04                  | 0.062202                 | 0.056337              | 0.006066                  | 8.30E-04               | 1.68E-04             | H     | 0.994186047 | 0.005813953 |
| H051                                                                                                                          | 0.108256                  | 0.012373              | 0.003147                  | 0.018699                 | 0.078746              | 0.02605                   | 0.001132               | 1.12E-04             | H     | 1           | 0           |
| H053                                                                                                                          | 4.89E-04                  | 0                     | 0                         | 4.65E-04                 | 0.004068              | 0                         | 0.136373               | 0                    | H     | 0.157622739 | 0.842377261 |
| H057                                                                                                                          | 0.017459                  | 0.009338              | 7.60E-05                  | 0.001607                 | 0.028067              | 0                         | 2.72E-04               | 7.70E-05             | H     | 0.798365123 | 0.201634877 |
| H058                                                                                                                          | 0.015019                  | 0.004533              | 0.001988                  | 0                        | 0.016661              | 1.08E-04                  | 0.089177               | 0                    | H     | 0.983516484 | 0.016483516 |
| H059                                                                                                                          | 0.005077                  | 0.005576              | 0                         | 0                        | 0.028606              | 3.99E-04                  | 0.086398               | 0                    | H     | 0.597368421 | 0.402631579 |
| H060                                                                                                                          | 0.138805                  | 4.40E-04              | 0.013757                  | 0.014134                 | 0.042114              | 0.002253                  | 0.014903               | 5.04E-04             | H     | 0.917737789 | 0.082262211 |
| H061                                                                                                                          | 0.028545                  | 0.006815              | 5.00E-04                  | 0.004589                 | 0.002373              | 0.004148                  | 0                      | 0                    | H     | 0.820855615 | 0.179144385 |
| H062                                                                                                                          | 0.017341                  | 0.010191              | 6.32E-04                  | 0.005104                 | 0.049701              | 0.008857                  | 0.008131               | 0.001767             | H     | 0.986376022 | 0.013623978 |
| H063                                                                                                                          | 0.002601                  | 0.004826              | 9.90E-05                  | 0.016607                 | 0.069981              | 0.012445                  | 4.07E-04               | 1.34E-04             | H     | 0.634920635 | 0.365079365 |
| H064                                                                                                                          | 0.029758                  | 0.039637              | 6.00E-05                  | 0.002867                 | 0.072119              | 0.001026                  | 2.40E-05               | 8.70E-05             | H     | 0.863157895 | 0.136842105 |
| H065                                                                                                                          | 0.075201                  | 0.014686              | 0.001016                  | 0.001628                 | 0.119246              | 0.089314                  | 0.001439               | 3.41E-04             | H     | 0.982005141 | 0.017994859 |
| H066                                                                                                                          | 0.025504                  | 0.005546              | 0.006465                  | 0.036816                 | 0.057992              | 0                         | 0.011706               | 0.003937             | H     | 0.864864865 | 0.135135135 |
| H067                                                                                                                          | 0.043834                  | 0.03767               | 0.002838                  | 6.80E-05                 | 0.064997              | 0.005346                  | 1.09E-04               | 1.06E-04             | H     | 0.997333333 | 0.002666667 |
| H070                                                                                                                          | 0.007897                  | 0.004198              | 0.007694                  | 0                        | 0.143909              | 8.90E-05                  | 0                      | 3.00E-05             | H     | 0.725212465 | 0.274787535 |
| H071                                                                                                                          | 0.092555                  | 0.002132              | 0.011921                  | 0.002657                 | 0.011084              | 0.003118                  | 1.49E-04               | 3.30E-05             | H     | 0.989041096 | 0.010958904 |
| H073                                                                                                                          | 0.012243                  | 0.004383              | 0.053734                  | 0.003046                 | 0.031257              | 0.001345                  | 3.20E-05               | 1.05E-04             | H     | 0.99734748  | 0.00265252  |
| H074                                                                                                                          | 0.054474                  | 0.010171              | 2.57E-04                  | 0.00115                  | 0.06074               | 0.002196                  | 0                      | 0                    | H     | 0.965517241 | 0.034482759 |
| H075                                                                                                                          | 0.020393                  | 0.019637              | 2.31E-04                  | 0.003624                 | 0.079922              | 0.006721                  | 8.00E-04               | 0.002942             | H     | 0.9375      | 0.0625      |
| H076                                                                                                                          | 0.03519                   | 0.008096              | 0.027663                  | 0                        | 0.014614              | 0.004701                  | 1.40E-05               | 0                    | H     | 0.97721519  | 0.02278481  |
| H078                                                                                                                          | 0.053695                  | 0.007879              | 0.024343                  | 0.002096                 | 0.02872               | 0.005474                  | 4.70E-05               | 0                    | H     | 1           | 0           |
| H079                                                                                                                          | 0.054505                  | 0.002658              | 0.002201                  | 0.001009                 | 0.0081                | 2.53E-04                  | 0                      | 0                    | H     | 0.882022472 | 0.117977528 |
| H083                                                                                                                          | 0.017132                  | 0.022264              | 0.002231                  | 0.003368                 | 0.075032              | 0.014342                  | 9.10E-05               | 6.40E-05             | H     | 1           | 0           |
| H084                                                                                                                          | 0.013827                  | 0.004199              | 0.003835                  | 0.013405                 | 0.063553              | 0.007843                  | 8.82E-04               | 3.12E-04             | H     | 1           | 0           |
| H086                                                                                                                          | 0.051763                  | 0.009466              | 7.48E-04                  | 0.015631                 | 0.020686              | 0.00635                   | 5.70E-05               | 1.81E-04             | H     | 1           | 0           |
| H088                                                                                                                          | 0.055384                  | 0.003817              | 0.004408                  | 0.062848                 | 0.024462              | 0.001063                  | 6.30E-05               | 2.28E-04             | H     | 0.991253644 | 0.008746356 |



|      |          |          |          |          |          |          |          |          |    |             |             |
|------|----------|----------|----------|----------|----------|----------|----------|----------|----|-------------|-------------|
| H089 | 0.040195 | 0.005346 | 0.001095 | 0.001277 | 0.013188 | 0.00152  | 0        | 0        | H  | 0.994350282 | 0.005649718 |
| H090 | 0.044787 | 0.003261 | 0.026812 | 3.02E-04 | 0.036973 | 4.80E-05 | 1.49E-04 | 0        | H  | 0.95264624  | 0.04735376  |
| H091 | 0.045619 | 0.02008  | 0.003785 | 0        | 0.020105 | 0.002927 | 0.002845 | 5.86E-04 | H  | 0.989361702 | 0.010638298 |
| H092 | 0.115768 | 0.018248 | 0.007391 | 0.014503 | 0.036335 | 0.011123 | 8.40E-05 | 0        | H  | 1           | 0           |
| H093 | 0.030992 | 0.013011 | 0.00543  | 7.89E-04 | 0.051412 | 0.005576 | 2.77E-04 | 0        | H  | 1           | 0           |
| H094 | 0.044984 | 0.006953 | 0.020815 | 0.002699 | 0.01894  | 6.73E-04 | 3.50E-05 | 3.70E-05 | H  | 0.994397759 | 0.005602241 |
| H096 | 0.013673 | 0.010953 | 0.00393  | 0.001274 | 0.156204 | 0.01041  | 9.23E-04 | 4.79E-04 | H  | 0.977961433 | 0.022038567 |
| H097 | 0.035786 | 0.01464  | 0.012154 | 3.12E-04 | 0.041705 | 0.002396 | 4.10E-05 | 0        | H  | 1           | 0           |
| H098 | 0.040004 | 0.00709  | 0.074558 | 2.70E-05 | 0.079104 | 0.012995 | 0.001048 | 1.58E-04 | H  | 0.991620112 | 0.008379888 |
| H099 | 0.049781 | 0.004007 | 0.166693 | 0        | 0.028455 | 0.002693 | 0.003592 | 0.002017 | H  | 0.960212202 | 0.039787798 |
| H100 | 0.057319 | 0.004579 | 0.034961 | 0        | 0.021709 | 0.005848 | 7.15E-04 | 1.31E-04 | H  | 0.997229917 | 0.002770083 |
| H102 | 0.037952 | 0.00947  | 2.44E-04 | 1.09E-04 | 0.051053 | 0.048582 | 1.11E-04 | 6.80E-05 | H  | 0.986149584 | 0.013850416 |
| H104 | 0.098941 | 0.007038 | 0.001712 | 0.003076 | 0.067654 | 0.003325 | 0.006516 | 8.11E-04 | H  | 1           | 0           |
| H107 | 0.041294 | 0.034246 | 0.001179 | 0.001208 | 0.08149  | 0.00802  | 0.013004 | 0.001283 | H  | 1           | 0           |
| H108 | 0.080637 | 0.028676 | 0.003026 | 0        | 0.083408 | 0.021424 | 3.18E-04 | 2.06E-04 | H  | 0.997340426 | 0.002659574 |
| H109 | 0.078129 | 0.021387 | 8.75E-04 | 0        | 0.040663 | 0.025118 | 1.50E-05 | 3.60E-05 | H  | 0.974431818 | 0.025568182 |
| H110 | 0.02162  | 0.023475 | 0.003241 | 0.002883 | 0.057953 | 0.019834 | 0.001504 | 1.72E-04 | H  | 1           | 0           |
| H113 | 0.097204 | 0.019802 | 0.010992 | 2.78E-04 | 0.022765 | 0.014801 | 0.003071 | 9.80E-05 | H  | 1           | 0           |
| H114 | 0.012756 | 0.053437 | 0.032325 | 0        | 0.055373 | 0.001789 | 1.20E-05 | 4.70E-05 | H  | 0.977653631 | 0.022346369 |
| H116 | 0.037866 | 0.002669 | 0.02876  | 1.40E-04 | 0.012281 | 0.001874 | 1.00E-04 | 2.20E-05 | H  | 0.964769648 | 0.035230352 |
| H118 | 0.092623 | 0.079959 | 0.007409 | 0        | 0.045838 | 7.56E-04 | 0.005913 | 0        | H  | 1           | 0           |
| H120 | 0.065596 | 0.013053 | 0.012708 | 1.93E-04 | 0.131309 | 0.002229 | 0.0016   | 1.16E-04 | H  | 0.976       | 0.024       |
| H122 | 0.022281 | 0.003465 | 0.00426  | 0.003007 | 0.271669 | 0.005944 | 7.11E-04 | 3.01E-04 | H  | 0.994778068 | 0.005221932 |
| H123 | 0.063179 | 0.012549 | 0.009564 | 0.003262 | 0.0671   | 0.006456 | 0.001692 | 2.41E-04 | H  | 1           | 0           |
| H124 | 0.083639 | 0.017498 | 0.017349 | 0.004717 | 0.051928 | 0.016609 | 0.001175 | 2.26E-04 | H  | 0.997282609 | 0.002717391 |
| H125 | 0.014122 | 4.34E-04 | 1.34E-04 | 0        | 0.003494 | 2.12E-04 | 0.090153 | 0        | H  | 0.595800525 | 0.404199475 |
| H126 | 0.056543 | 0.006755 | 0.008721 | 0.015497 | 0.024327 | 0.006459 | 3.15E-04 | 1.76E-04 | H  | 1           | 0           |
| H127 | 0.047149 | 0.033854 | 0.005787 | 9.54E-04 | 0.040986 | 0.026506 | 3.50E-05 | 2.80E-05 | H  | 1           | 0           |
| H130 | 0.004621 | 0.003251 | 0.035994 | 0.001203 | 0.009081 | 8.42E-04 | 7.90E-05 | 0        | H  | 0.855555556 | 0.144444444 |
| H131 | 0.01421  | 0.005361 | 0.019102 | 2.40E-05 | 0.01717  | 3.05E-04 | 0.001199 | 2.29E-04 | H  | 0.969863014 | 0.030136986 |
| H133 | 0.023343 | 0.042546 | 2.00E-05 | 7.10E-05 | 0.023643 | 0.004011 | 0.002115 | 5.50E-05 | H  | 0.766666667 | 0.233333333 |
| H137 | 0.001172 | 0.004158 | 0.011821 | 0.001622 | 0.041253 | 0.017804 | 0        | 0        | H  | 0.467391304 | 0.532608696 |
| H139 | 0.028432 | 0.006862 | 2.22E-04 | 0.006063 | 0.120339 | 0        | 2.70E-05 | 3.07E-04 | H  | 0.909574468 | 0.090425532 |
| H141 | 0.026722 | 0.031848 | 0.001526 | 0        | 0.036621 | 9.84E-04 | 3.90E-05 | 1.83E-04 | H  | 0.983286908 | 0.016713092 |
| H142 | 0.043599 | 0.004373 | 2.27E-04 | 4.33E-04 | 0.042017 | 0        | 3.56E-04 | 1.46E-04 | H  | 0.962962963 | 0.037037037 |
| H146 | 0.007401 | 0.127197 | 4.93E-04 | 0        | 0.005166 | 0.001316 | 0.001963 | 0        | H  | 0.799450549 | 0.200549451 |
| H147 | 0.027643 | 0.005848 | 5.43E-04 | 0.003503 | 0.039458 | 0.004064 | 0        | 0        | H  | 0.992       | 0.008       |
| H149 | 0.006262 | 0.00106  | 4.99E-04 | 0        | 0.091292 | 9.56E-04 | 3.10E-05 | 1.44E-04 | H  | 0.663101604 | 0.336898396 |
| H150 | 0.053082 | 0.017278 | 0.007748 | 2.12E-04 | 0.024227 | 4.38E-04 | 2.50E-05 | 0        | H  | 0.989071038 | 0.010928962 |
| CC01 | 0        | 4.38E-04 | 0        | 0        | 8.74E-04 | 0        | 0        | 1.53E-04 | CC | 0.002793296 | 0.997206704 |
| CC02 | 0.011077 | 3.28E-04 | 1.50E-04 | 1.80E-05 | 7.50E-05 | 0        | 4.70E-05 | 0.004329 | CC | 0.558746736 | 0.441253264 |
| CC05 | 0.002475 | 2.58E-04 | 0        | 0        | 7.69E-04 | 0        | 0        | 5.90E-05 | CC | 0.011527378 | 0.988472622 |
| CC06 | 0.002152 | 0        | 2.94E-04 | 0        | 1.60E-05 | 0        | 0        | 0        | CC | 0.146341463 | 0.853658537 |
| CC08 | 0        | 1.07E-04 | 0        | 0        | 3.10E-05 | 0        | 0        | 2.40E-05 | CC | 0.005319149 | 0.994680851 |
| CC09 | 8.25E-04 | 4.42E-04 | 0        | 0        | 0.001747 | 0        | 0        | 0.002982 | CC | 0.002724796 | 0.997275204 |
| CC12 | 0        | 0        | 0        | 0        | 0.062756 | 0        | 0        | 2.53E-04 | CC | 0.023872679 | 0.976127321 |
| CC16 | 3.26E-04 | 3.43E-04 | 2.60E-05 | 3.31E-04 | 0.005518 | 2.24E-04 | 0.001108 | 0.026888 | CC | 0.079081633 | 0.920918367 |
| CC17 | 8.90E-05 | 0.001149 | 6.10E-05 | 0        | 0.002857 | 0        | 0.014741 | 0.01011  | CC | 0.122015915 | 0.877984085 |
| CC20 | 4.68E-04 | 0.004014 | 0        | 0        | 1.21E-04 | 8.40E-05 | 1.15E-04 | 0.0198   | CC | 0.051282051 | 0.948717949 |
| CC21 | 5.68E-04 | 0.002686 | 0        | 0        | 0.069076 | 0.001047 | 2.90E-05 | 0.071493 | CC | 0.102040816 | 0.897959184 |
| CC24 | 0.003881 | 6.84E-04 | 2.10E-05 | 1.80E-05 | 0.001579 | 1.51E-04 | 0        | 1.78E-04 | CC | 0.08839779  | 0.91160221  |
| CC25 | 2.67E-04 | 0.001284 | 0        | 0        | 0.003254 | 1.29E-04 | 0        | 2.63E-04 | CC | 0.002949853 | 0.997050147 |
| CC26 | 1.55E-04 | 9.40E-05 | 0        | 0        | 0.017573 | 0        | 0        | 4.35E-04 | CC | 0.002739726 | 0.997260274 |
| CC27 | 6.72E-04 | 0.001966 | 2.90E-05 | 0.00105  | 0.007688 | 5.80E-05 | 2.20E-05 | 1.80E-05 | CC | 0.235751295 | 0.764248705 |
| CC28 | 0        | 1.23E-04 | 0        | 0        | 0.00291  | 0        | 0        | 0.001221 | CC | 0           | 1           |
| CC29 | 0.00424  | 8.79E-04 | 0        | 0        | 0.001    | 0        | 0        | 0.002451 | CC | 0.103448276 | 0.896551724 |
| CC30 | 0.002532 | 4.13E-04 | 0        | 0        | 0.004419 | 0        | 0        | 3.39E-04 | CC | 0.024793388 | 0.975206612 |
| CC31 | 4.18E-04 | 1.23E-04 | 0        | 6.90E-05 | 2.27E-04 | 0        | 0        | 2.71E-04 | CC | 0.011204482 | 0.988795518 |

|      |          |          |          |          |          |          |          |          |    |             |             |
|------|----------|----------|----------|----------|----------|----------|----------|----------|----|-------------|-------------|
| CC33 | 1.29E-04 | 5.90E-05 | 0        | 2.14E-04 | 9.14E-04 | 0        | 0        | 2.02E-04 | CC | 0.03038674  | 0.96961326  |
| CC34 | 0.005969 | 0.016982 | 1.89E-04 | 2.50E-05 | 0.004239 | 0.001819 | 0        | 1.80E-05 | CC | 0.783625731 | 0.216374269 |
| CC35 | 8.90E-05 | 0        | 0        | 0        | 6.31E-04 | 0        | 0        | 0        | CC | 0.03968254  | 0.96031746  |
| CC36 | 0.002337 | 0.001014 | 0        | 0        | 0.06718  | 8.83E-04 | 3.21E-04 | 0.023502 | CC | 0.152173913 | 0.847826087 |
| CC37 | 4.18E-04 | 0.001276 | 7.00E-05 | 0        | 0.00638  | 6.20E-05 | 0        | 0.001362 | CC | 0.03021148  | 0.96978852  |
| CC39 | 1.02E-04 | 0.003831 | 0        | 0        | 0.013396 | 0        | 3.40E-05 | 1.74E-04 | CC | 0.161016949 | 0.838983051 |
| CC42 | 0        | 0.007879 | 0        | 0        | 0.0242   | 5.74E-04 | 0        | 5.71E-04 | CC | 0.143222506 | 0.856777494 |
| CC43 | 3.70E-05 | 1.60E-05 | 0        | 0        | 2.13E-04 | 0        | 6.74E-04 | 0.044794 | CC | 0.019178082 | 0.980821918 |
| CC44 | 2.58E-04 | 0.003174 | 1.12E-04 | 5.70E-05 | 0.024842 | 0        | 0        | 0.001993 | CC | 0.166666667 | 0.833333333 |
| CC45 | 3.32E-04 | 0.001992 | 0        | 0        | 0.019614 | 9.91E-04 | 0        | 0        | CC | 0.080645161 | 0.919354839 |
| CC46 | 0        | 0        | 1.05E-04 | 0        | 0.019492 | 9.40E-05 | 0        | 0        | CC | 0.094182825 | 0.905817175 |
| CC48 | 0        | 2.10E-05 | 0        | 0        | 2.02E-04 | 6.50E-05 | 0        | 0.029702 | CC | 0           | 1           |
| CC52 | 0        | 1.34E-04 | 4.30E-05 | 0.001653 | 0.042351 | 0        | 9.71E-04 | 0.044685 | CC | 0.191011236 | 0.808988764 |
| CC54 | 0.001761 | 3.18E-04 | 0        | 0        | 1.87E-04 | 0        | 0        | 9.60E-05 | CC | 0.00265252  | 0.99734748  |
| CC55 | 1.92E-04 | 0.023183 | 0        | 0        | 1.39E-04 | 0        | 0        | 0.00739  | CC | 0.049723757 | 0.950276243 |
| CC57 | 4.93E-04 | 1.30E-04 | 2.09E-04 | 1.65E-04 | 0.019942 | 5.37E-04 | 1.09E-04 | 0.054377 | CC | 0.192200557 | 0.807799443 |
| CC58 | 1.08E-04 | 2.30E-04 | 0        | 0        | 0.002399 | 0        | 0        | 7.54E-04 | CC | 0           | 1           |
| CC60 | 3.87E-04 | 0        | 0        | 0.001047 | 6.17E-04 | 1.58E-04 | 0        | 0        | CC | 0.229110512 | 0.770889488 |
| CC62 | 4.34E-04 | 1.92E-04 | 0        | 0        | 1.31E-04 | 1.58E-04 | 0        | 1.90E-04 | CC | 0.002762431 | 0.997237569 |
| CC63 | 1.49E-04 | 0.001934 | 0        | 5.00E-05 | 0.002714 | 0        | 0        | 8.70E-05 | CC | 0.00802139  | 0.99197861  |
| CC64 | 9.40E-05 | 1.43E-04 | 0        | 1.10E-05 | 0.001689 | 2.88E-04 | 0        | 2.60E-05 | CC | 0.005540166 | 0.994459834 |
| CC65 | 0.001383 | 4.03E-04 | 0        | 2.30E-05 | 0.003558 | 0        | 0        | 6.17E-04 | CC | 0.021857923 | 0.978142077 |
| CC67 | 6.39E-04 | 0.001084 | 2.74E-04 | 0        | 0.004737 | 3.50E-05 | 0        | 0        | CC | 0.180628272 | 0.819371728 |
| CC68 | 0        | 7.07E-04 | 0        | 0        | 0.011327 | 5.85E-04 | 0        | 0        | CC | 0.050531915 | 0.949468085 |
| CC69 | 3.14E-04 | 0.002433 | 0        | 1.34E-04 | 0.00434  | 8.94E-04 | 0        | 6.60E-05 | CC | 0.10982659  | 0.89017341  |
| CC70 | 5.27E-04 | 0.007182 | 0        | 0        | 0.002988 | 4.60E-04 | 0        | 0.003929 | CC | 0.058171745 | 0.941828255 |
| CC71 | 0        | 1.21E-04 | 0        | 0        | 0.136297 | 7.80E-04 | 0        | 3.10E-05 | CC | 0.062337662 | 0.937662338 |
| CC72 | 6.45E-04 | 0.012509 | 0.002011 | 0        | 0.12503  | 0.006898 | 0        | 0.004864 | CC | 0.465875371 | 0.534124629 |
| CC73 | 0.001063 | 0.003746 | 0        | 1.80E-05 | 0.044164 | 2.73E-04 | 0        | 0.003175 | CC | 0.139130435 | 0.860869565 |

**Supplementary Table S9. the corresponding output value and POD value of each optimal microbial marker in the validation cohort**

| SampleID | OTU5<br>(Haemophilus) | OTU10<br>(Alloprevotella) | OTU26<br>(Prevotella) | OTU29<br>(Porphyromonas) | OTU34<br>(Halomonas) | OTU67<br>(Alloprevotella) | OTU71<br>(Alloprevotella) | OTU252<br>(Prevotella) | POD(H) | POD(CC) |
|----------|-----------------------|---------------------------|-----------------------|--------------------------|----------------------|---------------------------|---------------------------|------------------------|--------|---------|
| H006     | 0.025335              | 0.005892                  | 0.002772              | 0.011426                 | 2.60E-04             | 0.00368                   | 0.001602                  | 0.001118               | 0.935  | 0.065   |
| H014     | 0.010686              | 0.039625                  | 0.004085              | 2.82E-04                 | 0                    | 8.72E-04                  | 0.003012                  | 8.60E-05               | 0.998  | 0.002   |
| H016     | 0.00554               | 0.034345                  | 0.004225              | 0.002536                 | 0                    | 0                         | 5.98E-04                  | 3.10E-05               | 0.919  | 0.081   |
| H018     | 0.061137              | 0.039745                  | 0.036134              | 4.00E-05                 | 3.40E-05             | 0.032793                  | 0.001889                  | 0.001057               | 0.998  | 0.002   |
| H026     | 0.008158              | 0.148932                  | 0.00309               | 1.73E-04                 | 2.10E-05             | 3.29E-04                  | 0.014516                  | 0.001448               | 0.992  | 0.008   |
| H030     | 0.024287              | 0.069639                  | 0.001646              | 0.017919                 | 2.80E-05             | 0.002521                  | 0.002825                  | 3.10E-05               | 0.968  | 0.032   |
| H031     | 0.029449              | 0.012357                  | 0.009768              | 0.002557                 | 3.60E-04             | 0.021889                  | 0.007456                  | 3.57E-04               | 1      | 0       |
| H033     | 0.010302              | 0.008737                  | 0.001739              | 0.00197                  | 8.80E-05             | 0.004627                  | 2.28E-04                  | 0                      | 0.799  | 0.201   |
| H038     | 0.004819              | 0.044032                  | 0.003322              | 4.52E-04                 | 0                    | 0.001802                  | 0.016648                  | 0                      | 0.943  | 0.057   |
| H042     | 0.0108                | 0.023244                  | 4.22E-04              | 0.003282                 | 2.30E-05             | 5.50E-05                  | 0.038952                  | 2.30E-05               | 0.861  | 0.139   |
| H043     | 0.04826               | 0.063016                  | 0.053227              | 0.002588                 | 1.01E-04             | 0.009466                  | 0.003225                  | 7.60E-05               | 1      | 0       |
| H045     | 0.00748               | 0.001736                  | 0                     | 0.011787                 | 5.59E-04             | 8.52E-04                  | 1.57E-04                  | 3.82E-04               | 0.372  | 0.628   |
| H046     | 0.050842              | 0.02173                   | 0.014105              | 0.003963                 | 7.30E-05             | 0.001202                  | 0.001431                  | 6.00E-05               | 1      | 0       |
| H047     | 0.034881              | 0.025654                  | 0.022395              | 0                        | 2.32E-04             | 0                         | 5.42E-04                  | 0.005772               | 0.965  | 0.035   |
| H050     | 0.030476              | 0.057304                  | 0.003737              | 0.024151                 | 2.00E-04             | 6.33E-04                  | 0.01501                   | 1.13E-04               | 0.996  | 0.004   |
| H052     | 0.102663              | 0.021537                  | 0.002881              | 3.09E-04                 | 4.00E-05             | 0.021094                  | 8.80E-05                  | 0.001229               | 0.881  | 0.119   |
| H054     | 0.014104              | 0.01654                   | 0.006403              | 0.027841                 | 5.78E-04             | 0.007915                  | 0.0013                    | 0.024921               | 0.996  | 0.004   |
| H055     | 0.022427              | 0                         | 0                     | 7.90E-05                 | 8.40E-05             | 0.036755                  | 0                         | 0.045874               | 0.297  | 0.703   |
| H056     | 8.41E-04              | 0.070254                  | 4.80E-05              | 0.024943                 | 1.96E-04             | 0.001424                  | 0.002015                  | 2.12E-04               | 0.742  | 0.258   |
| H068     | 0.016413              | 0.043169                  | 0.00895               | 2.60E-05                 | 2.71E-04             | 0.009747                  | 3.20E-04                  | 5.82E-04               | 0.972  | 0.028   |
| H069     | 0.041748              | 0.033679                  | 0.007827              | 3.93E-04                 | 4.90E-05             | 0                         | 0.005714                  | 0                      | 0.931  | 0.069   |
| H072     | 0.020162              | 0.036445                  | 0.00668               | 0.001007                 | 0                    | 0.02689                   | 0.004749                  | 3.80E-05               | 1      | 0       |
| H077     | 0.027445              | 0.044523                  | 0.002108              | 0.002204                 | 0                    | 0.004803                  | 6.13E-04                  | 0                      | 0.952  | 0.048   |
| H080     | 0.054068              | 0.066962                  | 9.86E-04              | 0.004483                 | 1.06E-04             | 0.00403                   | 0.001282                  | 0                      | 0.915  | 0.085   |
| H081     | 0.064643              | 0.028831                  | 0.082044              | 0                        | 3.27E-04             | 0                         | 2.58E-04                  | 0.001296               | 0.941  | 0.059   |
| H082     | 0.019533              | 0.076179                  | 0.020489              | 0.001416                 | 4.30E-05             | 0.011001                  | 0.00115                   | 1.03E-04               | 1      | 0       |
| H085     | 0.001773              | 0.004118                  | 5.85E-04              | 0.002864                 | 1.38E-04             | 2.11E-04                  | 0.006514                  | 8.70E-05               | 0.631  | 0.369   |
| H087     | 0.042178              | 0.081098                  | 0.018317              | 2.80E-04                 | 2.40E-05             | 0.00246                   | 4.40E-05                  | 1.26E-04               | 0.874  | 0.126   |
| H095     | 0.045585              | 0.011526                  | 0.023139              | 0.001077                 | 5.60E-05             | 0.023381                  | 0.009942                  | 5.61E-04               | 0.994  | 0.006   |
| H101     | 0.084984              | 0.01034                   | 0.018187              | 0.005655                 | 1.97E-04             | 0.001331                  | 2.68E-04                  | 3.69E-04               | 0.99   | 0.01    |
| H103     | 0.013926              | 0.023039                  | 0.004497              | 0.019602                 | 1.66E-04             | 0.00211                   | 0.001485                  | 4.00E-05               | 0.996  | 0.004   |
| H105     | 0.114463              | 0.058853                  | 0.031395              | 0.001819                 | 0.001205             | 0.035106                  | 4.82E-04                  | 0.009045               | 0.992  | 0.008   |
| H106     | 0.02148               | 0.038039                  | 0.011865              | 0.071559                 | 4.20E-05             | 0.008127                  | 0.003826                  | 2.60E-04               | 1      | 0       |
| H111     | 0.062478              | 0.190903                  | 0.076171              | 0.003396                 | 1.09E-04             | 0.00473                   | 0.001063                  | 2.90E-04               | 1      | 0       |
| H112     | 0.021811              | 0.112873                  | 0.010143              | 0.003402                 | 7.60E-05             | 0.00538                   | 0.057106                  | 2.55E-04               | 1      | 0       |
| H115     | 0.072655              | 0.011676                  | 0.002603              | 0                        | 4.40E-05             | 0                         | 0                         | 4.80E-05               | 0.567  | 0.433   |
| H117     | 0.010371              | 0.02263                   | 0.004059              | 6.73E-04                 | 2.80E-05             | 5.04E-04                  | 2.70E-04                  | 2.90E-05               | 0.974  | 0.026   |
| H119     | 0.068675              | 0.034558                  | 0.011063              | 0.01247                  | 3.91E-04             | 0.032529                  | 0.006438                  | 4.36E-04               | 1      | 0       |
| H121     | 0.0662                | 0.031032                  | 0.022103              | 0.004348                 | 4.50E-05             | 0.006434                  | 8.20E-05                  | 0.001721               | 0.976  | 0.024   |
| H129     | 0.01571               | 0.029295                  | 0.00857               | 0.006538                 | 3.40E-05             | 0.00119                   | 0.007544                  | 5.80E-05               | 1      | 0       |
| H132     | 0.127956              | 0.026791                  | 0.012135              | 0.002527                 | 2.57E-04             | 0.023739                  | 0                         | 2.21E-04               | 0.821  | 0.179   |
| H135     | 0.016197              | 0.019489                  | 0.007338              | 3.91E-04                 | 0                    | 3.72E-04                  | 0.008252                  | 0                      | 0.968  | 0.032   |
| H136     | 0.013114              | 0.031896                  | 0.016584              | 0                        | 9.60E-05             | 8.25E-04                  | 0.004075                  | 0                      | 0.881  | 0.119   |
| H138     | 0.039681              | 0.017895                  | 9.90E-04              | 0                        | 5.90E-05             | 2.47E-04                  | 0.022534                  | 0                      | 0.817  | 0.183   |
| H140     | 0.152457              | 0.009239                  | 0.012063              | 0.018526                 | 0.001072             | 0.024626                  | 1.53E-04                  | 3.00E-05               | 0.891  | 0.109   |
| H143     | 0.02735               | 0.032836                  | 0.010043              | 0.115912                 | 8.40E-05             | 0.008533                  | 0.004813                  | 8.70E-05               | 1      | 0       |
| CC03     | 0.099779              | 0                         | 1.95E-04              | 0.010451                 | 0.032827             | 0                         | 0                         | 1.30E-05               | 0.128  | 0.872   |
| CC04     | 0.010281              | 1.72E-04                  | 7.04E-04              | 0                        | 0                    | 0                         | 0                         | 0                      | 0.025  | 0.975   |
| CC07     | 1.23E-04              | 0                         | 8.40E-05              | 0                        | 0                    | 4.60E-05                  | 4.40E-05                  | 0                      | 0.009  | 0.991   |
| CC10     | 0.005024              | 0.020021                  | 0.049762              | 0                        | 0.188121             | 0.001342                  | 2.70E-05                  | 4.20E-04               | 0.619  | 0.381   |
| CC11     | 1.42E-04              | 4.70E-05                  | 0.002193              | 0                        | 7.71E-04             | 3.10E-05                  | 0                         | 0                      | 0.002  | 0.998   |
| CC13     | 0.005559              | 0                         | 0.001854              | 4.90E-05                 | 0.00163              | 3.23E-04                  | 0                         | 5.40E-05               | 0.064  | 0.936   |
| CC15     | 3.60E-05              | 5.60E-05                  | 0.097106              | 0                        | 0                    | 0                         | 0                         | 0                      | 0.089  | 0.911   |
| CC18     | 0.001214              | 1.56E-04                  | 5.70E-05              | 2.46E-04                 | 0.006885             | 0                         | 2.31E-04                  | 0                      | 0.083  | 0.917   |
| CC19     | 8.20E-05              | 0                         | 0                     | 0                        | 7.90E-05             | 0                         | 0                         | 0                      | 0.008  | 0.992   |

|      |          |          |          |          |          |          |          |          |       |       |
|------|----------|----------|----------|----------|----------|----------|----------|----------|-------|-------|
| CC22 | 0.001878 | 2.89E-04 | 0.002572 | 0        | 0        | 0        | 0        | 0        | 0.024 | 0.976 |
| CC23 | 3.04E-04 | 2.39E-04 | 6.16E-04 | 0        | 0        | 0        | 0        | 0        | 0.013 | 0.987 |
| CC32 | 4.41E-04 | 1.38E-04 | 1.54E-04 | 0        | 1.45E-04 | 0        | 0        | 0        | 0.001 | 0.999 |
| CC38 | 2.13E-04 | 0        | 7.00E-05 | 0        | 7.70E-05 | 0        | 0        | 0        | 0     | 1     |
| CC40 | 0.015961 | 0.001096 | 0.011366 | 0        | 0.030382 | 1.28E-04 | 0        | 0        | 0.07  | 0.93  |
| CC41 | 0.001319 | 0.001295 | 0        | 0        | 0        | 0        | 2.44E-04 | 0        | 0.061 | 0.939 |
| CC47 | 9.90E-05 | 9.10E-05 | 0        | 0        | 0        | 0        | 9.20E-05 | 0        | 0.02  | 0.98  |
| CC49 | 6.44E-04 | 2.22E-04 | 8.88E-04 | 0        | 1.13E-04 | 0        | 0        | 0        | 0     | 1     |
| CC50 | 5.24E-04 | 0        | 0        | 0        | 0        | 0        | 0        | 0        | 0.018 | 0.982 |
| CC51 | 0.024989 | 9.00E-05 | 4.70E-05 | 0        | 0.008301 | 3.10E-05 | 2.70E-05 | 2.90E-05 | 0.022 | 0.978 |
| CC53 | 1.93E-04 | 4.40E-05 | 3.96E-04 | 0        | 0.00138  | 0        | 0        | 0        | 0     | 1     |
| CC56 | 6.75E-04 | 2.74E-04 | 4.50E-05 | 0        | 4.80E-05 | 3.80E-05 | 0        | 0        | 0.002 | 0.998 |
| CC59 | 0.027355 | 0.005104 | 0.004374 | 0        | 0.005696 | 0        | 3.80E-05 | 0        | 0.363 | 0.637 |
| CC61 | 0.010136 | 0.001146 | 8.00E-05 | 2.30E-05 | 0.015732 | 0        | 0        | 0        | 0.012 | 0.988 |
| CC66 | 7.37E-04 | 0.002779 | 0.001499 | 6.36E-04 | 4.50E-05 | 8.40E-05 | 2.80E-05 | 0        | 0.127 | 0.873 |
| CC74 | 2.60E-05 | 0.020825 | 0.017794 | 0        | 1.20E-05 | 8.70E-05 | 6.60E-04 | 0        | 0.666 | 0.334 |

| Supplementary Table S10. the correSconding output value and POD valueof each optimal microbial marker in the in the SC (n=36) and H(n=46) groups. |                       |                           |                       |                          |                      |                           |                           |                        |        |         |
|---------------------------------------------------------------------------------------------------------------------------------------------------|-----------------------|---------------------------|-----------------------|--------------------------|----------------------|---------------------------|---------------------------|------------------------|--------|---------|
| SampleID                                                                                                                                          | OTU5<br>(Haemophilus) | OTU10<br>(Alloprevotella) | OTU26<br>(Prevotella) | OTU29<br>(Porphyromonas) | OTU34<br>(Halomonas) | OTU67<br>(Alloprevotella) | OTU71<br>(Alloprevotella) | OTU252<br>(Prevotella) | POD(H) | POD(SC) |
| H006                                                                                                                                              | 0.02494               | 0.005897                  | 0.002763              | 0.01125                  | 2.44E-04             | 0.003708                  | 0.001586                  | 0.001129               | 0.936  | 0.064   |
| H014                                                                                                                                              | 0.010548              | 0.039656                  | 0.003981              | 3.03E-04                 | 0                    | 8.79E-04                  | 0.003029                  | 9.60E-05               | 0.998  | 0.002   |
| H016                                                                                                                                              | 0.005602              | 0.034508                  | 0.004291              | 0.00248                  | 0                    | 0                         | 5.53E-04                  | 3.40E-05               | 0.921  | 0.079   |
| H018                                                                                                                                              | 0.061794              | 0.03997                   | 0.035719              | 3.40E-05                 | 3.40E-05             | 0.032897                  | 0.001923                  | 0.001049               | 0.998  | 0.002   |
| H026                                                                                                                                              | 0.008169              | 0.148829                  | 0.003238              | 1.79E-04                 | 2.70E-05             | 3.33E-04                  | 0.014713                  | 0.001471               | 0.994  | 0.006   |
| H030                                                                                                                                              | 0.024129              | 0.070329                  | 0.001632              | 0.01749                  | 1.90E-05             | 0.00249                   | 0.002823                  | 4.20E-05               | 0.965  | 0.035   |
| H031                                                                                                                                              | 0.029174              | 0.012376                  | 0.009729              | 0.0027                   | 3.55E-04             | 0.021756                  | 0.007571                  | 3.50E-04               | 1      | 0       |
| H033                                                                                                                                              | 0.010309              | 0.008738                  | 0.001738              | 0.0019                   | 8.00E-05             | 0.004723                  | 2.11E-04                  | 0                      | 0.734  | 0.266   |
| H038                                                                                                                                              | 0.004796              | 0.043831                  | 0.003412              | 4.40E-04                 | 0                    | 0.00184                   | 0.016628                  | 0                      | 0.943  | 0.057   |
| H042                                                                                                                                              | 0.010689              | 0.023417                  | 4.72E-04              | 0.00337                  | 3.10E-05             | 5.30E-05                  | 0.038857                  | 1.50E-05               | 0.87   | 0.13    |
| H043                                                                                                                                              | 0.0485                | 0.062772                  | 0.053347              | 0.00254                  | 7.80E-05             | 0.009547                  | 0.003286                  | 6.50E-05               | 1      | 0       |
| H045                                                                                                                                              | 0.00753               | 0.001744                  | 0                     | 0.01193                  | 5.59E-04             | 9.24E-04                  | 1.95E-04                  | 4.19E-04               | 0.386  | 0.614   |
| H046                                                                                                                                              | 0.050906              | 0.02165                   | 0.013956              | 0.0041                   | 5.80E-05             | 0.001163                  | 0.001464                  | 6.70E-05               | 1      | 0       |
| H047                                                                                                                                              | 0.034629              | 0.025729                  | 0.022251              | 0                        | 2.80E-04             | 0                         | 5.16E-04                  | 0.005729               | 0.963  | 0.037   |
| H050                                                                                                                                              | 0.030332              | 0.057696                  | 0.00371               | 0.02393                  | 1.75E-04             | 6.79E-04                  | 0.015142                  | 1.14E-04               | 0.996  | 0.004   |
| H052                                                                                                                                              | 0.103024              | 0.022                     | 0.002819              | 3.13E-04                 | 3.80E-05             | 0.021099                  | 8.70E-05                  | 0.001205               | 0.879  | 0.121   |
| H054                                                                                                                                              | 0.014181              | 0.016759                  | 0.006383              | 0.02769                  | 5.88E-04             | 0.008044                  | 0.001258                  | 0.024623               | 0.997  | 0.003   |
| H055                                                                                                                                              | 0.022311              | 0                         | 0                     | 8.60E-05                 | 7.90E-05             | 0.03683                   | 0                         | 0.045607               | 0.293  | 0.707   |
| H056                                                                                                                                              | 9.33E-04              | 0.070131                  | 5.50E-05              | 0.02493                  | 1.85E-04             | 0.00145                   | 0.002018                  | 2.18E-04               | 0.742  | 0.258   |
| H068                                                                                                                                              | 0.016681              | 0.043253                  | 0.008941              | 3.80E-05                 | 2.63E-04             | 0.009907                  | 3.06E-04                  | 5.99E-04               | 0.983  | 0.017   |
| H069                                                                                                                                              | 0.041517              | 0.033259                  | 0.007759              | 3.86E-04                 | 3.60E-05             | 0                         | 0.005608                  | 0                      | 0.931  | 0.069   |
| H072                                                                                                                                              | 0.02007               | 0.036571                  | 0.006669              | 0.00105                  | 0                    | 0.026771                  | 0.004726                  | 3.90E-05               | 1      | 0       |
| H077                                                                                                                                              | 0.027036              | 0.044522                  | 0.002071              | 0.00215                  | 0                    | 0.004685                  | 6.73E-04                  | 0                      | 0.949  | 0.051   |
| H080                                                                                                                                              | 0.054242              | 0.066895                  | 9.77E-04              | 0.00461                  | 1.05E-04             | 0.003855                  | 0.001271                  | 0                      | 0.915  | 0.085   |
| H081                                                                                                                                              | 0.064731              | 0.028841                  | 0.082122              | 0                        | 3.59E-04             | 0                         | 2.71E-04                  | 0.001313               | 0.938  | 0.062   |
| H082                                                                                                                                              | 0.019448              | 0.076093                  | 0.020501              | 0.00148                  | 5.10E-05             | 0.010885                  | 0.001145                  | 9.00E-05               | 1      | 0       |
| H085                                                                                                                                              | 0.001903              | 0.004208                  | 6.11E-04              | 0.00286                  | 1.43E-04             | 2.13E-04                  | 0.006572                  | 8.00E-05               | 0.632  | 0.368   |
| H087                                                                                                                                              | 0.042176              | 0.081204                  | 0.018355              | 2.85E-04                 | 2.80E-05             | 0.002593                  | 5.00E-05                  | 1.16E-04               | 0.889  | 0.111   |
| H095                                                                                                                                              | 0.045726              | 0.011381                  | 0.022788              | 0.00111                  | 6.10E-05             | 0.023076                  | 0.009942                  | 5.83E-04               | 0.994  | 0.006   |
| H101                                                                                                                                              | 0.085557              | 0.010443                  | 0.018227              | 0.00587                  | 1.89E-04             | 0.001382                  | 2.84E-04                  | 3.68E-04               | 0.991  | 0.009   |
| H103                                                                                                                                              | 0.013931              | 0.022714                  | 0.004602              | 0.01957                  | 1.88E-04             | 0.002177                  | 0.001492                  | 5.00E-05               | 0.996  | 0.004   |
| H105                                                                                                                                              | 0.114719              | 0.058608                  | 0.031405              | 0.00187                  | 0.001238             | 0.035216                  | 4.83E-04                  | 0.008984               | 0.992  | 0.008   |
| H106                                                                                                                                              | 0.02143               | 0.037794                  | 0.011999              | 0.07137                  | 3.10E-05             | 0.008041                  | 0.004013                  | 2.88E-04               | 1      | 0       |
| H111                                                                                                                                              | 0.062386              | 0.191038                  | 0.075805              | 0.0034                   | 1.10E-04             | 0.00469                   | 0.00108                   | 2.84E-04               | 1      | 0       |
| H112                                                                                                                                              | 0.022003              | 0.113452                  | 0.010024              | 0.0035                   | 9.80E-05             | 0.005495                  | 0.056831                  | 2.96E-04               | 1      | 0       |
| H115                                                                                                                                              | 0.072928              | 0.011631                  | 0.002532              | 0                        | 4.20E-05             | 0                         | 0                         | 5.20E-05               | 0.546  | 0.454   |
| H117                                                                                                                                              | 0.010267              | 0.022254                  | 0.003946              | 6.29E-04                 | 2.90E-05             | 4.81E-04                  | 2.98E-04                  | 3.30E-05               | 0.972  | 0.028   |
| H119                                                                                                                                              | 0.067987              | 0.034588                  | 0.011457              | 0.01225                  | 3.88E-04             | 0.03212                   | 0.006484                  | 4.11E-04               | 1      | 0       |
| H121                                                                                                                                              | 0.066062              | 0.031146                  | 0.022248              | 0.0042                   | 5.10E-05             | 0.006497                  | 6.00E-05                  | 0.001716               | 0.961  | 0.039   |
| H129                                                                                                                                              | 0.015757              | 0.029164                  | 0.008545              | 0.00665                  | 2.90E-05             | 0.001142                  | 0.007546                  | 6.40E-05               | 1      | 0       |
| H132                                                                                                                                              | 0.127402              | 0.026997                  | 0.012314              | 0.0025                   | 2.68E-04             | 0.023674                  | 0                         | 2.14E-04               | 0.82   | 0.18    |
| H135                                                                                                                                              | 0.01611               | 0.019672                  | 0.007281              | 3.90E-04                 | 0                    | 3.80E-04                  | 0.008149                  | 0                      | 0.968  | 0.032   |
| H136                                                                                                                                              | 0.013211              | 0.032018                  | 0.016746              | 0                        | 8.30E-05             | 8.49E-04                  | 0.004003                  | 0                      | 0.882  | 0.118   |
| H138                                                                                                                                              | 0.039867              | 0.017692                  | 0.001023              | 0                        | 5.70E-05             | 2.29E-04                  | 0.022446                  | 0                      | 0.817  | 0.183   |
| H140                                                                                                                                              | 0.153742              | 0.009267                  | 0.012075              | 0.01851                  | 0.001122             | 0.024807                  | 1.39E-04                  | 3.40E-05               | 0.898  | 0.102   |
| H143                                                                                                                                              | 0.027558              | 0.032442                  | 0.010157              | 0.11628                  | 8.00E-05             | 0.008482                  | 0.004635                  | 9.40E-05               | 1      | 0       |
| SC01                                                                                                                                              | 0                     | 0.002882                  | 0.004998              | 8.80E-05                 | 5.52E-04             | 0                         | 8.40E-05                  | 0                      | 0.224  | 0.776   |
| SC02                                                                                                                                              | 0.050138              | 1.51E-04                  | 0                     | 0                        | 0.00805              | 8.90E-05                  | 0                         | 0                      | 0.008  | 0.992   |
| SC03                                                                                                                                              | 0.030727              | 4.16E-04                  | 0.037825              | 0                        | 3.71E-04             | 5.90E-05                  | 1.82E-04                  | 0                      | 0.179  | 0.821   |
| SC04                                                                                                                                              | 0.016671              | 0.005919                  | 5.15E-04              | 1.17E-04                 | 5.09E-04             | 0                         | 0                         | 0                      | 0.307  | 0.693   |
| SC05                                                                                                                                              | 0.008697              | 0.001198                  | 0.002188              | 0                        | 3.70E-05             | 0                         | 0                         | 0                      | 0.043  | 0.957   |
| SC06                                                                                                                                              | 0.032839              | 0.007596                  | 0.00352               | 0                        | 0.376659             | 0.00485                   | 0                         | 5.00E-05               | 0.498  | 0.502   |
| SC07                                                                                                                                              | 0.051337              | 0.0011                    | 8.20E-05              | 0                        | 0.002596             | 2.39E-04                  | 0                         | 0                      | 0.011  | 0.989   |
| SC08                                                                                                                                              | 0.036345              | 9.12E-04                  | 0.010763              | 0                        | 0.019049             | 6.68E-04                  | 0                         | 0                      | 0.093  | 0.907   |
| SC09                                                                                                                                              | 0.01888               | 0.009166                  | 0.005236              | 0                        | 0.026735             | 0.001671                  | 0.007779                  | 0                      | 0.704  | 0.296   |
| SC10                                                                                                                                              | 1.03E-04              | 9.13E-04                  | 9.94E-04              | 0                        | 0.009145             | 2.46E-04                  | 0                         | 0                      | 0.003  | 0.997   |
| SC11                                                                                                                                              | 0.015867              | 0.001197                  | 0.01225               | 9.90E-05                 | 0.022518             | 4.26E-04                  | 2.20E-05                  | 0                      | 0.158  | 0.842   |
| SC12                                                                                                                                              | 0.012805              | 9.93E-04                  | 0.002793              | 0                        | 0                    | 0                         | 6.50E-05                  | 0                      | 0.127  | 0.873   |
| SC13                                                                                                                                              | 0.026613              | 2.29E-04                  | 0.003805              | 0                        | 0.003782             | 0.001907                  | 0                         | 0                      | 0.063  | 0.937   |
| SC14                                                                                                                                              | 0.016544              | 2.48E-04                  | 0.00114               | 0                        | 0.03635              | 5.46E-04                  | 0                         | 0                      | 0.001  | 0.999   |
| SC15                                                                                                                                              | 0.019523              | 9.50E-04                  | 0.012488              | 0                        | 2.42E-04             | 0                         | 0                         | 0                      | 0.108  | 0.892   |
| SC16                                                                                                                                              | 1.02E-04              | 1.20E-04                  | 5.90E-05              | 0                        | 0.001569             | 9.30E-05                  | 0                         | 0                      | 0      | 1       |
| SC17                                                                                                                                              | 0.002585              | 0.002658                  | 0.001173              | 3.24E-04                 | 6.10E-05             | 1.16E-04                  | 0.001844                  | 0                      | 0.385  | 0.615   |
| SC18                                                                                                                                              | 0.017317              | 7.06E-04                  | 9.83E-04              | 6.79E-04                 | 0.015286             | 2.45E-04                  | 2.14E-04                  | 0                      | 0.179  | 0.821   |
| SC19                                                                                                                                              | 0.010458              | 0.020077                  | 2.82E-04              | 0                        | 9.45E-04             | 0.034679                  | 2.70E-05                  | 0                      | 0.539  | 0.461   |
| SC20                                                                                                                                              | 0.051541              | 1.73E-04                  | 6.19E-04              | 0                        | 5.15E-04             | 0.007975                  | 0                         | 0                      | 0.095  | 0.905   |
| SC21                                                                                                                                              | 0.010624              | 6.40E-05                  | 0.001517              | 0                        | 3.31E-04             | 0.00165                   | 0                         | 0                      | 0.065  | 0.935   |
| SC22                                                                                                                                              | 0.014461              | 8.78E-04                  | 0.008055              | 0                        | 0.001395             | 8.30E-05                  | 5.90E-05                  | 0                      | 0.126  | 0.874   |
| SC23                                                                                                                                              | 0.048933              | 0.003893                  | 0.001337              | 0                        | 0                    | 0.001114                  | 0                         | 0                      | 0.21   | 0.79    |
| SC24                                                                                                                                              | 0.156023              | 0.003124                  | 0.010545              | 0                        | 0                    | 6.52E-04                  | 0                         | 0                      | 0.357  | 0.643   |
| SC25                                                                                                                                              | 0.009901              | 0.003111                  | 0.00146               | 0.00588                  | 0.031659             | 7.06E-04                  | 8.30E-05                  | 0                      | 0.288  | 0.712   |
| SC26                                                                                                                                              | 0.015818              | 1.49E-04                  | 0.006246              | 0                        | 7.11E-04             | 9.10E-05                  | 0                         | 0                      | 0.073  | 0.927   |
| SC27                                                                                                                                              | 0.019062              | 0.044221                  | 5.16E-04              | 0                        | 4.12E-04             | 0                         | 0                         | 0                      | 0.516  | 0.484   |
| SC28                                                                                                                                              | 0.012866              | 0.013502                  | 0.016746              | 1.03E-04                 | 6.70E-05             | 0.005797                  | 0                         | 0                      | 0.637  | 0.363   |
| SC29                                                                                                                                              | 1.60E-05              | 3.08E-04                  | 8.48E-04              | 0                        | 1.11E-04             | 0                         | 0                         | 7.40E-05               | 0.042  | 0.958   |

|      |          |          |          |          |          |          |          |          |       |       |
|------|----------|----------|----------|----------|----------|----------|----------|----------|-------|-------|
| SC30 | 0.022841 | 6.30E-05 | 0.001888 | 5.19E-04 | 0.006572 | 2.30E-05 | 3.20E-05 | 0        | 0.082 | 0.918 |
| SC31 | 0        | 3.10E-05 | 0.004075 | 0        | 0.05222  | 3.10E-05 | 0        | 1.16E-04 | 0.024 | 0.976 |
| SC32 | 0.019692 | 5.30E-05 | 0.003142 | 1.13E-04 | 0.025805 | 0        | 1.20E-05 | 0        | 0.034 | 0.966 |
| SC33 | 0.007923 | 1.90E-05 | 8.92E-04 | 0        | 0.004746 | 0        | 0        | 0        | 0     | 1     |
| SC34 | 2.70E-04 | 1.96E-04 | 4.75E-04 | 2.70E-05 | 0.009324 | 7.40E-05 | 0        | 2.60E-05 | 0.011 | 0.989 |
| SC35 | 0.001144 | 6.10E-05 | 4.43E-04 | 0        | 0.03491  | 3.94E-04 | 6.10E-05 | 0        | 0.011 | 0.989 |
| SC36 | 0.105842 | 8.90E-05 | 0.001824 | 0        | 4.64E-04 | 0.064502 | 0        | 0        | 0.147 | 0.853 |

| <b>Table S11. The levels of Ig-G antibody</b> |        |       |
|-----------------------------------------------|--------|-------|
| IgG levels                                    | Number | Group |
| 0.78                                          | H-001  | H     |
| 1.56                                          | H-002  | H     |
| 0.74                                          | H-003  | H     |
| 0.37                                          | H-004  | H     |
| 0.38                                          | H-005  | H     |
| 2.31                                          | H-006  | H     |
| 10.13                                         | GY-704 | SCR   |
| 11.39                                         | GY-701 | SCR   |
| 18.75                                         | GY-712 | SCR   |
| 25.48                                         | GY-702 | SCR   |
| 47.26                                         | GY-703 | SCR   |
| 23.75                                         | GY-713 | SCR   |
| 18.86                                         | GY-714 | SCR   |
| 41.96                                         | GY-715 | SCR   |
| 54.28                                         | GY-716 | SCR   |
| 313.62                                        | GY-718 | SCR   |
| 13.03                                         | GY-719 | SCR   |
| 17.21                                         | GY-709 | SCR   |
| 29.31                                         | GY-721 | SCR   |
| 13.86                                         | GY-726 | SCR   |
| 341.49                                        | GY-727 | SCR   |
| 39.75                                         | GY-728 | SCR   |
| 23.57                                         | GY-708 | SCR   |
| 15.64                                         | GY-731 | SCR   |
| 10.11                                         | GY-724 | SCR   |
| 15.26                                         | GY-717 | SCR   |
| 57.27                                         | GY-732 | SCR   |
| 31.58                                         | GY-734 | SCR   |
| 19.64                                         | GY-736 | SCR   |
| 21.29                                         | GY-720 | SCR   |
| 25.16                                         | GY-725 | SCR   |
| 48.14                                         | GY-710 | SCR   |
| 11.27                                         | GY-729 | SCR   |
| 22.74                                         | GY-711 | SCR   |
| 87.76                                         | GY-737 | SCR   |
| 308.06                                        | GY-730 | SCR   |
| 43.96                                         | GY-723 | SCR   |
| 45.64                                         | GY-705 | SCR   |
| 37.46                                         | GY-733 | SCR   |
| 21.57                                         | GY-735 | SCR   |
| 327.93                                        | GY-706 | SCR   |
| 13.67                                         | GY-707 | SCR   |
| 451.37                                        | GY-801 | CCR   |
| 214.03                                        | GY-802 | CCR   |
| 524.97                                        | GY-803 | CCR   |
| 282.51                                        | GY-804 | CCR   |
| 973.87                                        | GY-805 | CCR   |
| 848.58                                        | GY-806 | CCR   |
| 147.04                                        | GY-807 | CCR   |
| 112.88                                        | GY-808 | CCR   |
| 420.79                                        | GY-809 | CCR   |
| 188.59                                        | GY-810 | CCR   |
| 230.16                                        | GY-811 | CCR   |
| 336.60                                        | GY-813 | CCR   |
| 254.92                                        | GY-814 | CCR   |

|        |        |     |
|--------|--------|-----|
| 247.17 | GY-815 | CCR |
| 201.13 | GY-816 | CCR |
| 122.54 | GY-817 | CCR |
| 446.07 | GY-818 | CCR |
| 448.21 | GY-819 | CCR |
| 279.65 | GY-820 | CCR |
| 312.12 | GY-821 | CCR |
| 225.38 | GY-822 | CCR |



| Supplementary table S12. The detailed values of oral microbial diversity index and observed OTUs among CC (n=73), SC (n=36), and H (n=140) groups. |        |       |         |          |          |          |          |               |
|----------------------------------------------------------------------------------------------------------------------------------------------------|--------|-------|---------|----------|----------|----------|----------|---------------|
| sample                                                                                                                                             | reads  | label | ace     | chao     | shannon  | simpson  | coverage | observed_otus |
| CC01                                                                                                                                               | 7455   | 0.97  | 135.608 | 147.5    | 2.524982 | 0.160715 | 0.995842 | 101           |
| CC02                                                                                                                                               | 44451  | 0.97  | 262.705 | 237.0667 | 2.849096 | 0.099143 | 0.998943 | 165           |
| CC03                                                                                                                                               | 48453  | 0.97  | 230.535 | 224.12   | 2.341045 | 0.195993 | 0.999113 | 188           |
| CC04                                                                                                                                               | 34734  | 0.97  | 192.784 | 206.9286 | 2.769604 | 0.107754 | 0.998877 | 154           |
| CC05                                                                                                                                               | 31376  | 0.97  | 126.918 | 133.1429 | 2.582905 | 0.13304  | 0.999363 | 106           |
| CC06                                                                                                                                               | 54380  | 0.97  | 173.429 | 170.2353 | 3.030465 | 0.07619  | 0.999559 | 154           |
| CC07                                                                                                                                               | 25172  | 0.97  | 159.026 | 154.3125 | 2.248837 | 0.264487 | 0.998967 | 134           |
| CC08                                                                                                                                               | 36229  | 0.97  | 189.743 | 159.5833 | 2.179127 | 0.173118 | 0.999034 | 110           |
| CC09                                                                                                                                               | 29623  | 0.97  | 241.633 | 228      | 3.156719 | 0.078491 | 0.99865  | 168           |
| CC10                                                                                                                                               | 35071  | 0.97  | 279.369 | 284.913  | 3.429069 | 0.064269 | 0.998489 | 225           |
| CC11                                                                                                                                               | 27951  | 0.97  | 219.866 | 190.8333 | 2.489673 | 0.156193 | 0.998497 | 143           |
| CC12                                                                                                                                               | 47479  | 0.97  | 272.714 | 212.4    | 1.342442 | 0.467968 | 0.998863 | 117           |
| CC13                                                                                                                                               | 19591  | 0.97  | 291.683 | 243      | 2.391576 | 0.220811 | 0.997091 | 167           |
| CC15                                                                                                                                               | 22672  | 0.97  | 170.484 | 110      | 2.506587 | 0.107933 | 0.998941 | 64            |
| CC16                                                                                                                                               | 65473  | 0.97  | 393.698 | 408.4286 | 2.477593 | 0.185261 | 0.998839 | 327           |
| CC17                                                                                                                                               | 45610  | 0.97  | 485.689 | 490.0227 | 3.884058 | 0.042297 | 0.998268 | 420           |
| CC18                                                                                                                                               | 113725 | 0.97  | 344.157 | 358.2727 | 3.34938  | 0.075944 | 0.999578 | 307           |
| CC19                                                                                                                                               | 12117  | 0.97  | 91.0936 | 93.33333 | 1.046064 | 0.627054 | 0.998267 | 70            |
| CC20                                                                                                                                               | 52561  | 0.97  | 367.719 | 316.12   | 2.557275 | 0.221046 | 0.998706 | 225           |
| CC21                                                                                                                                               | 42544  | 0.97  | 230.358 | 264.5455 | 3.22275  | 0.073994 | 0.999036 | 190           |
| CC22                                                                                                                                               | 8304   | 0.97  | 180.691 | 184.1538 | 3.443264 | 0.064305 | 0.995906 | 141           |
| CC23                                                                                                                                               | 16827  | 0.97  | 188.34  | 179.3913 | 2.434734 | 0.181119 | 0.997979 | 155           |
| CC24                                                                                                                                               | 53682  | 0.97  | 293.158 | 293.12   | 3.201019 | 0.105425 | 0.999106 | 248           |
| CC25                                                                                                                                               | 8343   | 0.97  | 226.185 | 218.6364 | 3.438151 | 0.064971 | 0.995206 | 195           |
| CC26                                                                                                                                               | 26851  | 0.97  | 351.889 | 294.8889 | 2.118671 | 0.351655 | 0.997505 | 213           |
| CC27                                                                                                                                               | 48813  | 0.97  | 319.578 | 323.5556 | 3.007876 | 0.166827 | 0.998996 | 280           |
| CC28                                                                                                                                               | 16935  | 0.97  | 252.228 | 250.913  | 2.779329 | 0.157222 | 0.99687  | 191           |
| CC29                                                                                                                                               | 55341  | 0.97  | 320.327 | 323.5652 | 3.415581 | 0.070506 | 0.999006 | 259           |
| CC30                                                                                                                                               | 25987  | 0.97  | 254.251 | 250.037  | 3.444605 | 0.059912 | 0.998653 | 228           |
| CC31                                                                                                                                               | 17336  | 0.97  | 208.825 | 210.0476 | 1.939938 | 0.398615 | 0.997635 | 171           |
| CC32                                                                                                                                               | 13496  | 0.97  | 160.406 | 159.1429 | 1.893053 | 0.331    | 0.997703 | 137           |
| CC33                                                                                                                                               | 16698  | 0.97  | 215.628 | 227.5556 | 2.338563 | 0.235778 | 0.997365 | 175           |
| CC34                                                                                                                                               | 43841  | 0.97  | 317.793 | 335.0455 | 3.870457 | 0.035621 | 0.998768 | 270           |
| CC35                                                                                                                                               | 11676  | 0.97  | 153.739 | 140.5    | 1.504863 | 0.449136 | 0.997345 | 94            |
| CC36                                                                                                                                               | 64763  | 0.97  | 433.069 | 424.1364 | 3.449841 | 0.064589 | 0.998688 | 343           |
| CC37                                                                                                                                               | 14751  | 0.97  | 252.834 | 254.12   | 3.516755 | 0.069812 | 0.997424 | 226           |
| CC38                                                                                                                                               | 13135  | 0.97  | 213.888 | 153.9286 | 1.874375 | 0.237637 | 0.997031 | 101           |
| CC39                                                                                                                                               | 32572  | 0.97  | 236.159 | 237.3846 | 1.888748 | 0.342543 | 0.998649 | 201           |
| CC40                                                                                                                                               | 60581  | 0.97  | 240.275 | 195.625  | 2.983687 | 0.120696 | 0.999389 | 154           |
| CC41                                                                                                                                               | 8255   | 0.97  | 229.281 | 275      | 2.934521 | 0.124152 | 0.993701 | 173           |
| CC42                                                                                                                                               | 14069  | 0.97  | 139.187 | 120.8125 | 2.401164 | 0.152428 | 0.998365 | 105           |
| CC43                                                                                                                                               | 76210  | 0.97  | 286.901 | 280.2286 | 2.655941 | 0.105055 | 0.999239 | 233           |
| CC44                                                                                                                                               | 18457  | 0.97  | 281.515 | 290.1364 | 3.525344 | 0.068021 | 0.997454 | 241           |
| CC45                                                                                                                                               | 23573  | 0.97  | 320.827 | 332.2917 | 3.166044 | 0.159358 | 0.997497 | 261           |
| CC46                                                                                                                                               | 9778   | 0.97  | 222.136 | 214.6    | 2.806427 | 0.147233 | 0.995398 | 175           |
| CC47                                                                                                                                               | 10638  | 0.97  | 196.432 | 160.5882 | 1.758022 | 0.338065 | 0.996334 | 117           |
| CC48                                                                                                                                               | 49094  | 0.97  | 177.551 | 168.1364 | 2.511787 | 0.111266 | 0.999144 | 129           |
| CC49                                                                                                                                               | 17850  | 0.97  | 159.54  | 162.0833 | 2.823122 | 0.13279  | 0.998543 | 135           |
| CC50                                                                                                                                               | 13881  | 0.97  | 153.605 | 122.1    | 1.538265 | 0.435624 | 0.998055 | 87            |
| CC51                                                                                                                                               | 41266  | 0.97  | 254.65  | 243.6364 | 2.15015  | 0.259824 | 0.998764 | 205           |
| CC52                                                                                                                                               | 47153  | 0.97  | 406.804 | 405.0714 | 3.724811 | 0.050097 | 0.998855 | 371           |
| CC53                                                                                                                                               | 47576  | 0.97  | 281.572 | 252.3529 | 2.606173 | 0.182189 | 0.998991 | 186           |
| CC54                                                                                                                                               | 20934  | 0.97  | 239.769 | 221.2857 | 3.458245 | 0.059758 | 0.998089 | 199           |
| CC55                                                                                                                                               | 43493  | 0.97  | 168.931 | 181.5455 | 2.875555 | 0.081591 | 0.999149 | 121           |
| CC56                                                                                                                                               | 24012  | 0.97  | 212.63  | 192.4    | 3.097301 | 0.079944 | 0.998459 | 148           |
| CC57                                                                                                                                               | 37653  | 0.97  | 419.01  | 421.1628 | 3.641364 | 0.07791  | 0.998141 | 365           |
| CC58                                                                                                                                               | 19236  | 0.97  | 257.303 | 276.5882 | 3.052715 | 0.123426 | 0.997557 | 213           |
| CC59                                                                                                                                               | 51820  | 0.97  | 268.646 | 261.9375 | 2.981119 | 0.096204 | 0.999132 | 231           |
| CC60                                                                                                                                               | 18762  | 0.97  | 231.801 | 230.3704 | 2.577832 | 0.254973 | 0.997815 | 200           |
| CC61                                                                                                                                               | 51264  | 0.97  | 223.914 | 212.0333 | 2.846164 | 0.09038  | 0.999083 | 176           |
| CC62                                                                                                                                               | 26361  | 0.97  | 218.952 | 229.1765 | 2.506215 | 0.178341 | 0.998596 | 190           |
| CC63                                                                                                                                               | 34039  | 0.97  | 244.584 | 237      | 2.759314 | 0.154714 | 0.998825 | 211           |
| CC64                                                                                                                                               | 84521  | 0.97  | 275.777 | 226.4    | 0.581201 | 0.813159 | 0.999349 | 167           |
| CC65                                                                                                                                               | 42728  | 0.97  | 212.46  | 206.125  | 1.856474 | 0.424501 | 0.999298 | 188           |
| CC66                                                                                                                                               | 40352  | 0.97  | 318.536 | 322      | 3.219454 | 0.087534 | 0.998587 | 265           |
| CC67                                                                                                                                               | 30156  | 0.97  | 262.215 | 265.4167 | 2.434043 | 0.307891 | 0.998541 | 226           |
| CC68                                                                                                                                               | 15742  | 0.97  | 219.654 | 230.1667 | 2.740964 | 0.147758 | 0.997268 | 180           |
| CC69                                                                                                                                               | 30088  | 0.97  | 240.154 | 226.5517 | 2.711422 | 0.134943 | 0.998704 | 201           |
| CC70                                                                                                                                               | 48825  | 0.97  | 264.104 | 244.0667 | 2.665516 | 0.207362 | 0.999099 | 181           |
| CC71                                                                                                                                               | 65325  | 0.97  | 207.556 | 209      | 2.92801  | 0.100844 | 0.999388 | 170           |
| CC72                                                                                                                                               | 35789  | 0.97  | 283.972 | 298.3333 | 3.498472 | 0.062326 | 0.998603 | 240           |
| CC73                                                                                                                                               | 35906  | 0.97  | 220.872 | 213.4444 | 2.273064 | 0.238135 | 0.998914 | 186           |
| CC74                                                                                                                                               | 73418  | 0.97  | 171.979 | 210.2    | 2.954036 | 0.120552 | 0.999673 | 155           |
| SC01                                                                                                                                               | 26648  | 0.97  | 233.011 | 246.0667 | 2.918566 | 0.15492  | 0.998349 | 183           |
| SC02                                                                                                                                               | 39458  | 0.97  | 304.18  | 252.5652 | 2.902501 | 0.095814 | 0.998606 | 188           |
| SC03                                                                                                                                               | 27989  | 0.97  | 325.323 | 310.5263 | 3.471199 | 0.07424  | 0.997999 | 270           |

|      |       |      |         |          |          |          |          |     |
|------|-------|------|---------|----------|----------|----------|----------|-----|
| SC04 | 31489 | 0.97 | 263.648 | 270      | 3.350013 | 0.074105 | 0.998476 | 223 |
| SC05 | 28731 | 0.97 | 224.515 | 204.7143 | 1.520976 | 0.469944 | 0.998434 | 134 |
| SC06 | 65617 | 0.97 | 210.957 | 211.4737 | 2.793536 | 0.162908 | 0.999589 | 193 |
| SC07 | 24848 | 0.97 | 210.234 | 219.125  | 2.990125 | 0.088547 | 0.998229 | 160 |
| SC08 | 38019 | 0.97 | 383.357 | 379.3947 | 3.724552 | 0.044648 | 0.998133 | 314 |
| SC09 | 32837 | 0.97 | 274.289 | 278.875  | 3.539166 | 0.057331 | 0.998721 | 243 |
| SC10 | 29086 | 0.97 | 177.505 | 177.25   | 2.873281 | 0.140802 | 0.999175 | 160 |
| SC11 | 78036 | 0.97 | 426.63  | 418.5957 | 3.821947 | 0.041186 | 0.999295 | 387 |
| SC12 | 17233 | 0.97 | 172.764 | 165.375  | 2.143685 | 0.302378 | 0.998201 | 146 |
| SC13 | 33387 | 0.97 | 347.388 | 355.8889 | 3.578498 | 0.054449 | 0.997993 | 274 |
| SC14 | 32459 | 0.97 | 352.434 | 370.3846 | 3.650344 | 0.065759 | 0.998121 | 300 |
| SC15 | 14771 | 0.97 | 262.546 | 266.04   | 3.442031 | 0.087543 | 0.996683 | 219 |
| SC16 | 32130 | 0.97 | 162.049 | 134.4615 | 1.878379 | 0.331453 | 0.999066 | 101 |
| SC17 | 47136 | 0.97 | 345.236 | 351.6897 | 3.776821 | 0.048219 | 0.999024 | 316 |
| SC18 | 36901 | 0.97 | 392.519 | 380.7179 | 3.363405 | 0.101914 | 0.998076 | 317 |
| SC19 | 37975 | 0.97 | 284.155 | 293.0435 | 3.427103 | 0.065895 | 0.998736 | 244 |
| SC20 | 25013 | 0.97 | 263.897 | 272      | 3.491889 | 0.057914 | 0.998281 | 229 |
| SC21 | 32058 | 0.97 | 153.058 | 146.8125 | 2.253267 | 0.26814  | 0.999283 | 131 |
| SC22 | 29700 | 0.97 | 262.346 | 244.8824 | 2.783632 | 0.165372 | 0.998451 | 184 |
| SC23 | 25753 | 0.97 | 246.302 | 240.25   | 3.393229 | 0.060079 | 0.99833  | 208 |
| SC24 | 43010 | 0.97 | 244.425 | 255.5556 | 3.318728 | 0.070518 | 0.999047 | 210 |
| SC25 | 48047 | 0.97 | 371.445 | 382.3333 | 4.037787 | 0.043611 | 0.999043 | 344 |
| SC26 | 36399 | 0.97 | 273.958 | 271.5333 | 3.122191 | 0.11065  | 0.998791 | 240 |
| SC27 | 31789 | 0.97 | 301.985 | 266.5556 | 3.29822  | 0.091428 | 0.998459 | 223 |
| SC28 | 29905 | 0.97 | 305.079 | 296      | 3.332877 | 0.101211 | 0.998127 | 241 |
| SC29 | 39693 | 0.97 | 160.967 | 152.8824 | 2.120597 | 0.295816 | 0.999269 | 129 |
| SC30 | 28121 | 0.97 | 338.927 | 335.5676 | 3.471624 | 0.090234 | 0.998435 | 310 |
| SC31 | 40581 | 0.97 | 257.218 | 190.3333 | 2.76832  | 0.109273 | 0.99899  | 122 |
| SC32 | 57303 | 0.97 | 382.054 | 391.2632 | 3.243782 | 0.083302 | 0.998744 | 324 |
| SC33 | 46286 | 0.97 | 317.719 | 268.7727 | 2.356783 | 0.195008 | 0.998725 | 191 |
| SC34 | 29757 | 0.97 | 291.189 | 282.1    | 3.496076 | 0.051985 | 0.998051 | 227 |
| SC35 | 54487 | 0.97 | 289.358 | 290.4063 | 2.930003 | 0.117401 | 0.998991 | 244 |
| SC36 | 21175 | 0.97 | 257.721 | 256.1154 | 3.080699 | 0.084339 | 0.997403 | 199 |
| H002 | 44182 | 0.97 | 418.714 | 416      | 3.699402 | 0.057874 | 0.998302 | 341 |
| H003 | 25256 | 0.97 | 344.936 | 339.3415 | 3.676188 | 0.052229 | 0.997941 | 307 |
| H004 | 46291 | 0.97 | 380.907 | 328.129  | 3.083469 | 0.085105 | 0.998401 | 241 |
| H005 | 46124 | 0.97 | 355.862 | 372.5556 | 3.494152 | 0.058567 | 0.998352 | 267 |
| H006 | 33928 | 0.97 | 459.301 | 467      | 3.801187 | 0.059782 | 0.997613 | 386 |
| H008 | 50924 | 0.97 | 403.438 | 360.2222 | 3.417499 | 0.053912 | 0.998468 | 249 |
| H009 | 40078 | 0.97 | 415.332 | 422.4103 | 3.914814 | 0.046382 | 0.998303 | 364 |
| H010 | 33172 | 0.97 | 408.103 | 407.3171 | 3.882001 | 0.043362 | 0.998252 | 367 |
| H011 | 32252 | 0.97 | 446.004 | 444.4667 | 4.143309 | 0.03684  | 0.998233 | 409 |
| H013 | 23478 | 0.97 | 311.297 | 321.25   | 3.302177 | 0.089915 | 0.997402 | 245 |
| H014 | 23771 | 0.97 | 254.276 | 250      | 3.393336 | 0.059212 | 0.997897 | 201 |
| H015 | 39861 | 0.97 | 359.012 | 340.0556 | 3.526607 | 0.058624 | 0.99852  | 245 |
| H016 | 30321 | 0.97 | 303.89  | 294.0345 | 3.34806  | 0.074098 | 0.99812  | 239 |
| H017 | 29082 | 0.97 | 345.604 | 359.3571 | 2.65418  | 0.250202 | 0.997902 | 294 |
| H018 | 29803 | 0.97 | 437.816 | 369.6512 | 3.594266 | 0.052852 | 0.997349 | 298 |
| H019 | 47629 | 0.97 | 372.11  | 317.7    | 3.488568 | 0.051559 | 0.998593 | 244 |
| H020 | 52408 | 0.97 | 379.994 | 375.8    | 3.649874 | 0.053269 | 0.998779 | 331 |
| H021 | 44461 | 0.97 | 440.36  | 437.5    | 4.1995   | 0.031625 | 0.998695 | 394 |
| H023 | 27682 | 0.97 | 354.837 | 347      | 3.805607 | 0.040967 | 0.997544 | 280 |
| H024 | 23929 | 0.97 | 440.036 | 483.7308 | 3.361027 | 0.145198 | 0.996866 | 377 |
| H025 | 49918 | 0.97 | 608.646 | 621.7213 | 3.896896 | 0.044358 | 0.997836 | 527 |
| H026 | 41157 | 0.97 | 535.015 | 527.2273 | 3.864113 | 0.052862 | 0.997716 | 461 |
| H027 | 26320 | 0.97 | 521.341 | 528.7255 | 3.933518 | 0.062305 | 0.996847 | 462 |
| H028 | 25712 | 0.97 | 419.29  | 455.1071 | 4.129717 | 0.031324 | 0.997083 | 356 |
| H029 | 33946 | 0.97 | 589.232 | 593.9828 | 4.438287 | 0.026878 | 0.997201 | 517 |
| H030 | 46722 | 0.97 | 604.197 | 621.1702 | 4.375987 | 0.02844  | 0.998202 | 547 |
| H031 | 45772 | 0.97 | 566.718 | 563.1719 | 3.949698 | 0.062979 | 0.998187 | 510 |
| H032 | 36906 | 0.97 | 541.295 | 547.7333 | 4.623533 | 0.020207 | 0.997887 | 481 |
| H033 | 23635 | 0.97 | 436.717 | 439.2195 | 4.15068  | 0.042533 | 0.997081 | 382 |
| H034 | 33433 | 0.97 | 488.732 | 526.7813 | 4.245549 | 0.030613 | 0.997547 | 423 |
| H035 | 50620 | 0.97 | 440.124 | 431.9783 | 3.700649 | 0.042183 | 0.99836  | 358 |
| H036 | 17126 | 0.97 | 289.937 | 271.875  | 3.446191 | 0.076332 | 0.996672 | 222 |
| H038 | 34885 | 0.97 | 324.08  | 364.55   | 3.624085 | 0.047539 | 0.998223 | 270 |
| H039 | 38270 | 0.97 | 374.103 | 364.9231 | 3.652344 | 0.049028 | 0.998171 | 303 |
| H040 | 27833 | 0.97 | 322.345 | 325      | 3.979503 | 0.031803 | 0.998096 | 272 |
| H041 | 33245 | 0.97 | 269.247 | 293.5    | 3.36575  | 0.057955 | 0.998376 | 214 |
| H042 | 39412 | 0.97 | 361.941 | 375.6    | 3.300093 | 0.081121 | 0.998148 | 288 |
| H043 | 43817 | 0.97 | 327.286 | 337.24   | 3.603384 | 0.051772 | 0.998768 | 280 |
| H044 | 36188 | 0.97 | 467.472 | 407.8333 | 3.384362 | 0.063624 | 0.99743  | 289 |
| H045 | 31363 | 0.97 | 403.314 | 399.3171 | 3.853847 | 0.046701 | 0.997896 | 347 |
| H046 | 29779 | 0.97 | 286.631 | 285.3333 | 3.061827 | 0.09883  | 0.998119 | 234 |
| H047 | 26875 | 0.97 | 436.087 | 427.32   | 3.603722 | 0.05671  | 0.996688 | 349 |
| H048 | 34909 | 0.97 | 367.018 | 371.0286 | 3.40195  | 0.072673 | 0.998023 | 304 |
| H049 | 41981 | 0.97 | 380.681 | 383.303  | 3.658843 | 0.052274 | 0.998309 | 308 |
| H050 | 45510 | 0.97 | 452.463 | 402.1622 | 4.000684 | 0.033242 | 0.99844  | 335 |
| H051 | 56479 | 0.97 | 500.79  | 508      | 3.949736 | 0.041336 | 0.998495 | 423 |
| H052 | 44502 | 0.97 | 381.8   | 394.6176 | 3.019068 | 0.115406 | 0.998315 | 313 |

|      |       |      |         |          |          |          |          |     |  |
|------|-------|------|---------|----------|----------|----------|----------|-----|--|
| H053 | 8717  | 0.97 | 309.071 | 333.3913 | 4.037103 | 0.04129  | 0.993232 | 259 |  |
| H054 | 13490 | 0.97 | 435.494 | 444.3714 | 4.808713 | 0.017356 | 0.996071 | 405 |  |
| H055 | 13119 | 0.97 | 341.252 | 358.3913 | 4.274174 | 0.029492 | 0.995655 | 289 |  |
| H056 | 34856 | 0.97 | 375.302 | 378.0294 | 3.614478 | 0.052626 | 0.997992 | 307 |  |
| H057 | 40713 | 0.97 | 341.246 | 342.0333 | 3.526476 | 0.067303 | 0.998477 | 279 |  |
| H058 | 10079 | 0.97 | 368.96  | 389      | 4.544121 | 0.023236 | 0.994543 | 334 |  |
| H059 | 12286 | 0.97 | 311.855 | 319.84   | 4.235218 | 0.029548 | 0.996419 | 282 |  |
| H060 | 29501 | 0.97 | 412.014 | 422.2    | 4.061236 | 0.042815 | 0.998339 | 383 |  |
| H061 | 23259 | 0.97 | 309.825 | 303.2286 | 3.299347 | 0.084408 | 0.997506 | 256 |  |
| H062 | 44382 | 0.97 | 452.62  | 462.3636 | 4.074878 | 0.041091 | 0.998783 | 419 |  |
| H063 | 45742 | 0.97 | 348.873 | 363.8889 | 3.077113 | 0.143506 | 0.998492 | 277 |  |
| H064 | 38339 | 0.97 | 372.879 | 385.5172 | 3.112837 | 0.106887 | 0.997861 | 271 |  |
| H065 | 52089 | 0.97 | 406.936 | 411.6923 | 3.723511 | 0.048696 | 0.998771 | 360 |  |
| H066 | 26537 | 0.97 | 396.481 | 408.3333 | 3.949891 | 0.070075 | 0.998267 | 370 |  |
| H067 | 27830 | 0.97 | 311.578 | 306.8485 | 3.2147   | 0.088234 | 0.99788  | 255 |  |
| H068 | 37090 | 0.97 | 392.969 | 403      | 2.897433 | 0.173494 | 0.997924 | 326 |  |
| H069 | 26283 | 0.97 | 335.185 | 354.4    | 3.394113 | 0.09502  | 0.997299 | 255 |  |
| H070 | 26930 | 0.97 | 330.703 | 336.9643 | 3.310997 | 0.082436 | 0.997512 | 258 |  |
| H071 | 30209 | 0.97 | 435.281 | 439.2174 | 3.904785 | 0.035978 | 0.997087 | 356 |  |
| H072 | 27873 | 0.97 | 335.972 | 338.0938 | 3.813318 | 0.05264  | 0.997776 | 279 |  |
| H073 | 36445 | 0.97 | 396.377 | 405.1765 | 3.840216 | 0.04214  | 0.998216 | 344 |  |
| H074 | 31459 | 0.97 | 299.52  | 290.0333 | 2.976409 | 0.123787 | 0.998029 | 227 |  |
| H075 | 37042 | 0.97 | 372.246 | 371.6923 | 3.362193 | 0.072541 | 0.998272 | 320 |  |
| H076 | 40083 | 0.97 | 436.306 | 394.8966 | 3.587233 | 0.070594 | 0.998079 | 294 |  |
| H077 | 23011 | 0.97 | 327.685 | 329.2759 | 2.850233 | 0.17234  | 0.996958 | 246 |  |
| H078 | 25401 | 0.97 | 344.552 | 352.1    | 3.876766 | 0.039019 | 0.99752  | 287 |  |
| H079 | 27934 | 0.97 | 301.749 | 297.1034 | 3.631062 | 0.047899 | 0.997995 | 244 |  |
| H080 | 26245 | 0.97 | 433.002 | 380.4375 | 3.643722 | 0.048642 | 0.997066 | 289 |  |
| H081 | 25087 | 0.97 | 355.891 | 342.5    | 3.369157 | 0.065979 | 0.99721  | 290 |  |
| H082 | 42683 | 0.97 | 374.295 | 363.3846 | 3.696568 | 0.053222 | 0.99829  | 296 |  |
| H083 | 44640 | 0.97 | 413.799 | 421.0263 | 3.500399 | 0.067822 | 0.99832  | 348 |  |
| H084 | 40666 | 0.97 | 388.421 | 402.303  | 3.222985 | 0.095712 | 0.998254 | 327 |  |
| H085 | 35737 | 0.97 | 333.607 | 332.1154 | 3.977446 | 0.033302 | 0.998461 | 275 |  |
| H086 | 35797 | 0.97 | 361.596 | 367.3125 | 3.62004  | 0.068939 | 0.998324 | 312 |  |
| H087 | 44050 | 0.97 | 353.82  | 327.4444 | 3.090671 | 0.092125 | 0.998502 | 248 |  |
| H088 | 39983 | 0.97 | 380.437 | 383.5294 | 3.611452 | 0.068028 | 0.998674 | 343 |  |
| H089 | 26372 | 0.97 | 350.856 | 383.1818 | 3.622669 | 0.065463 | 0.997687 | 300 |  |
| H090 | 21110 | 0.97 | 274.731 | 275.0357 | 3.533686 | 0.052846 | 0.997395 | 222 |  |
| H091 | 27107 | 0.97 | 416.521 | 417.1538 | 4.217094 | 0.030342 | 0.997455 | 357 |  |
| H092 | 24318 | 0.97 | 363.402 | 391.5769 | 3.847173 | 0.042134 | 0.99708  | 296 |  |
| H093 | 31004 | 0.97 | 321.178 | 320.125  | 3.393301 | 0.07095  | 0.998194 | 272 |  |
| H094 | 29782 | 0.97 | 330.54  | 360.9545 | 3.729384 | 0.044471 | 0.997918 | 275 |  |
| H095 | 33111 | 0.97 | 482.117 | 438.0968 | 3.781852 | 0.042573 | 0.997252 | 306 |  |
| H096 | 39006 | 0.97 | 417.023 | 413.3415 | 3.541915 | 0.065407 | 0.998154 | 351 |  |
| H097 | 23754 | 0.97 | 314.858 | 318.0333 | 3.393218 | 0.095713 | 0.99739  | 255 |  |
| H098 | 50077 | 0.97 | 311.686 | 314.6774 | 3.698655 | 0.038649 | 0.998882 | 265 |  |
| H099 | 39062 | 0.97 | 409.711 | 415.303  | 3.995593 | 0.047114 | 0.998413 | 358 |  |
| H100 | 38412 | 0.97 | 324.289 | 322.1935 | 3.544484 | 0.047589 | 0.998282 | 253 |  |
| H101 | 44812 | 0.97 | 348.523 | 348.0938 | 2.965165 | 0.131932 | 0.998505 | 279 |  |
| H102 | 25711 | 0.97 | 295.878 | 299.0385 | 3.479141 | 0.071852 | 0.998016 | 250 |  |
| H103 | 27776 | 0.97 | 356.688 | 340.1667 | 3.718208 | 0.063718 | 0.99784  | 291 |  |
| H104 | 37727 | 0.97 | 398.27  | 398      | 3.796227 | 0.044463 | 0.998622 | 364 |  |
| H105 | 32470 | 0.97 | 416.429 | 421.3636 | 4.064943 | 0.038265 | 0.998337 | 378 |  |
| H106 | 47327 | 0.97 | 445.156 | 450.0789 | 3.857419 | 0.045856 | 0.998331 | 369 |  |
| H107 | 38798 | 0.97 | 415.287 | 416.2778 | 4.062118 | 0.03387  | 0.998634 | 378 |  |
| H108 | 33537 | 0.97 | 360.304 | 360.7568 | 3.555296 | 0.061401 | 0.998002 | 301 |  |
| H109 | 43593 | 0.97 | 378.784 | 389.6563 | 3.453687 | 0.069093 | 0.998371 | 312 |  |
| H110 | 40098 | 0.97 | 446.003 | 433.5625 | 3.948802 | 0.042391 | 0.998055 | 371 |  |
| H111 | 41856 | 0.97 | 356.16  | 376.4643 | 3.288216 | 0.077505 | 0.998232 | 280 |  |
| H112 | 34330 | 0.97 | 342.403 | 358.6154 | 3.787234 | 0.043023 | 0.998019 | 271 |  |
| H113 | 42796 | 0.97 | 403.284 | 404.6923 | 4.042916 | 0.036855 | 0.998738 | 368 |  |
| H114 | 65401 | 0.97 | 367.055 | 373      | 3.60635  | 0.047148 | 0.998991 | 308 |  |
| H115 | 22659 | 0.97 | 297.482 | 260.625  | 3.549059 | 0.044281 | 0.997617 | 201 |  |
| H116 | 54448 | 0.97 | 375.614 | 398.1379 | 3.751188 | 0.042729 | 0.998678 | 310 |  |
| H117 | 31384 | 0.97 | 320.087 | 313.4688 | 3.410102 | 0.074112 | 0.99812  | 260 |  |
| H118 | 35534 | 0.97 | 383.349 | 388.0769 | 3.686999 | 0.048241 | 0.998227 | 338 |  |
| H119 | 44373 | 0.97 | 487.127 | 482.5849 | 3.701022 | 0.061269 | 0.998039 | 412 |  |
| H120 | 34403 | 0.97 | 392.993 | 409.9412 | 3.276819 | 0.092451 | 0.997675 | 317 |  |
| H121 | 41867 | 0.97 | 455.626 | 443.5645 | 3.118505 | 0.141777 | 0.998041 | 390 |  |
| H122 | 47318 | 0.97 | 442.627 | 426.1957 | 3.312569 | 0.106497 | 0.998267 | 354 |  |
| H123 | 37402 | 0.97 | 441.757 | 445.878  | 3.72312  | 0.0508   | 0.997567 | 346 |  |
| H124 | 38914 | 0.97 | 512.229 | 476.3714 | 3.876637 | 0.047911 | 0.997739 | 367 |  |
| H125 | 13782 | 0.97 | 385.463 | 402.8333 | 4.247319 | 0.028965 | 0.994848 | 320 |  |
| H126 | 41427 | 0.97 | 421.652 | 425.0857 | 4.163017 | 0.033719 | 0.998359 | 360 |  |
| H127 | 24349 | 0.97 | 503.061 | 378.3714 | 3.828937 | 0.037888 | 0.996386 | 269 |  |
| H129 | 30574 | 0.97 | 505.67  | 519.0227 | 4.163402 | 0.033715 | 0.996795 | 411 |  |
| H130 | 26281 | 0.97 | 337.651 | 326.7174 | 3.630579 | 0.056549 | 0.998059 | 299 |  |
| H131 | 49287 | 0.97 | 407.459 | 400.5    | 4.044654 | 0.042099 | 0.998864 | 362 |  |
| H132 | 26742 | 0.97 | 343.336 | 336.625  | 3.459161 | 0.071901 | 0.997532 | 283 |  |
| H133 | 33174 | 0.97 | 357.812 | 380.2    | 3.505306 | 0.070095 | 0.99792  | 302 |  |

|      |       |      |         |          |          |          |          |     |
|------|-------|------|---------|----------|----------|----------|----------|-----|
| H135 | 24873 | 0.97 | 269.392 | 267.3704 | 3.823605 | 0.041312 | 0.998352 | 237 |
| H136 | 33568 | 0.97 | 293.957 | 312.9    | 3.730852 | 0.040577 | 0.998421 | 244 |
| H137 | 35792 | 0.97 | 358.689 | 395.5    | 3.356914 | 0.101934 | 0.997988 | 289 |
| H138 | 45762 | 0.97 | 375.291 | 403.7778 | 3.551026 | 0.057076 | 0.998361 | 301 |
| H139 | 51560 | 0.97 | 319.685 | 355.3333 | 3.396349 | 0.064285 | 0.998836 | 257 |
| H140 | 52568 | 0.97 | 348.28  | 369      | 3.910153 | 0.048043 | 0.999144 | 314 |
| H141 | 51274 | 0.97 | 367.746 | 368.0278 | 3.976094 | 0.029779 | 0.999025 | 334 |
| H142 | 41740 | 0.97 | 346.227 | 359.4    | 3.90542  | 0.04003  | 0.998682 | 300 |
| H143 | 24063 | 0.97 | 351.815 | 338.4667 | 3.841079 | 0.043106 | 0.997631 | 303 |
| H146 | 41051 | 0.97 | 384.942 | 353.12   | 3.313343 | 0.073508 | 0.998222 | 248 |
| H147 | 22931 | 0.97 | 309.349 | 299.0263 | 3.070559 | 0.141815 | 0.997427 | 254 |
| H149 | 31417 | 0.97 | 371.937 | 384.4839 | 3.122366 | 0.109518 | 0.997836 | 311 |
| H150 | 32212 | 0.97 | 287.434 | 285.6774 | 3.439678 | 0.066554 | 0.998262 | 236 |













| CC11     | CC68     | CC03     | CC43     | CC07     | CC26     | CC51     | CC64     | CC12     | ID...75               | SC29     | SC27     | SC01     |
|----------|----------|----------|----------|----------|----------|----------|----------|----------|-----------------------|----------|----------|----------|
| 0.033308 | 0.024505 | 0.021677 | 0.019264 | 0.017214 | 0.011802 | 0.011603 | 0.003841 | 4.91E-04 | Bacteroidota          | 0.642169 | 0.588912 | 0.58714  |
| 0.502566 | 0.490069 | 0.251949 | 0.551057 | 0.071974 | 0.842951 | 0.747773 | 0.986156 | 0.715048 | Firmicutes            | 0.168359 | 0.268909 | 0.209807 |
| 0.001523 | 0.398277 | 0.656497 | 0.420238 | 0.087471 | 0.023441 | 0.08925  | 0.005044 | 0.114399 | Proteobacteria        | 9.94E-04 | 0.051676 | 0.049565 |
| 0.039878 | 0.069469 | 0.018683 | 9.86E-04 | 0.601499 | 0.062671 | 0.049523 | 0.001424 | 0.140492 | Fusobacteriota        | 0.133317 | 0.036733 | 0.054767 |
| 0.411446 | 0.011285 | 0.028801 | 0.006814 | 0.220511 | 0.056043 | 0.098239 | 0.002731 | 0.026673 | Actinobacteriota      | 0.020645 | 0.025835 | 0.044362 |
| 0        | 0.003271 | 2.08E-04 | 4.40E-05 | 0.001004 | 4.37E-04 | 1.63E-04 | 3.54E-04 | 1.28E-04 | Patescibacteria       | 0.032717 | 0.012372 | 0.053543 |
| 1.05E-04 | 0.001134 | 0.007067 | 8.10E-04 | 1.55E-04 | 0.001015 | 7.94E-04 | 6.90E-05 | 0        | Campilobacterota      | 0.00175  | 0.006403 | 7.30E-05 |
| 0        | 1.33E-04 | 0.003218 | 1.50E-05 | 0        | 7.46E-04 | 0.002228 | 4.00E-05 | 0        | Spirochaetota         | 0        | 0.008868 | 0        |
| 0.010514 | 0.00172  | 0        | 0        | 1.72E-04 | 7.08E-04 | 7.10E-05 | 3.41E-04 | 6.26E-04 | Bacteria_unclassified | 0        | 0        | 7.01E-04 |
| 0        | 0        | 2.20E-05 | 8.10E-05 | 0        | 1.45E-04 | 2.50E-05 | 0        | 4.70E-05 | Synergistota          | 0        | 2.31E-04 | 4.20E-05 |
| 0        | 0        | 0        | 6.00E-06 | 0        | 4.10E-05 | 0        | 0        | 0        | Desulfobacterota      | 0        | 6.10E-05 | 0        |
| 6.60E-04 | 1.37E-04 | 0.011878 | 6.05E-04 | 0        | 0        | 3.31E-04 | 0        | 0.001639 | Cyanobacteria         | 4.90E-05 | 0        | 0        |
| 0        | 0        | 0        | 0        | 0        | 0        | 0        | 0        | 0        | Deferribacterota      | 0        | 0        | 0        |
| 0        | 0        | 0        | 5.00E-05 | 0        | 0        | 0        | 0        | 0        | Verrucomicrobiota     | 0        | 0        | 0        |
| 0        | 0        | 0        | 0        | 0        | 0        | 0        | 0        | 4.57E-04 | Deinococcota          | 0        | 0        | 0        |
| 0        | 0        | 0        | 1.40E-05 | 0        | 0        | 0        | 0        | 0        | Chloroflexi           | 0        | 0        | 0        |
| 0        | 0        | 0        | 1.60E-05 | 0        | 0        | 0        | 0        | 0        | Elusimicrobiota       | 0        | 0        | 0        |
| 0        | 0        | 0        | 0        | 0        | 0        | 0        | 0        | 0        | Planctomycetota       | 0        | 0        | 0        |





| SC31     | SC18     | SC05     | SC02     | SC33     | SC16     | SC21     | ID...112              | H042     | H008     | H019     | H026     | H060     |
|----------|----------|----------|----------|----------|----------|----------|-----------------------|----------|----------|----------|----------|----------|
| 0.079596 | 0.078966 | 0.078925 | 0.078186 | 0.076564 | 0.062597 | 0.062246 | Bacteroidota          | 0.546506 | 0.516332 | 0.511812 | 0.504682 | 0.500047 |
| 0.53473  | 0.508753 | 0.037077 | 0.160492 | 0.448918 | 0.77758  | 0.771726 | Firmicutes            | 0.292866 | 0.269977 | 0.276012 | 0.216853 | 0.199169 |
| 0.234843 | 0.240235 | 0.841345 | 0.158932 | 0.329953 | 0.002438 | 0.070557 | Proteobacteria        | 0.02365  | 0.042386 | 0.028586 | 0.085732 | 0.144623 |
| 0.106256 | 0.131884 | 0.040538 | 0.586173 | 0.033996 | 2.29E-04 | 0.00174  | Fusobacteriota        | 0.045164 | 0.087664 | 0.103299 | 0.081095 | 0.068718 |
| 0.043891 | 0.02908  | 0.001635 | 0.014007 | 0.103236 | 0.146489 | 0.086453 | Actinobacteriota      | 0.057222 | 0.045484 | 0.044156 | 0.031973 | 0.05407  |
| 2.60E-05 | 0.004886 | 1.17E-04 | 2.20E-04 | 4.71E-04 | 3.60E-05 | 3.39E-04 | Patescibacteria       | 0.017684 | 0.025031 | 0.012106 | 0.037209 | 0.007225 |
| 2.13E-04 | 0.001794 | 2.06E-04 | 0.001688 | 1.14E-04 | 0.001672 | 1.37E-04 | Campilobacterota      | 0.015448 | 0.01277  | 0.023361 | 0.040304 | 0.016549 |
| 0        | 0.003001 | 5.10E-05 | 2.31E-04 | 2.78E-04 | 0        | 0        | Spirochaetota         | 0.001238 | 3.19E-04 | 6.45E-04 | 6.32E-04 | 0.006695 |
| 0        | 2.56E-04 | 7.00E-05 | 7.10E-05 | 0.006183 | 0.008928 | 0.006802 | Bacteria_unclassified | 4.80E-05 | 0        | 2.30E-05 | 0        | 0        |
| 0        | 7.63E-04 | 0        | 0        | 1.18E-04 | 0        | 0        | Synergistota          | 1.24E-04 | 1.90E-05 | 0        | 0        | 7.39E-04 |
| 2.30E-05 | 3.20E-04 | 3.60E-05 | 0        | 0        | 0        | 0        | Desulfobacterota      | 2.30E-05 | 0        | 0        | 0.001345 | 0.00108  |
| 4.22E-04 | 0        | 0        | 0        | 1.69E-04 | 0        | 0        | Cyanobacteria         | 0        | 0        | 0        | 8.30E-05 | 1.08E-04 |
| 0        | 0        | 0        | 0        | 0        | 0        | 0        | Deferribacterota      | 2.70E-05 | 0        | 0        | 1.90E-05 | 0        |
| 0        | 6.20E-05 | 0        | 0        | 0        | 3.10E-05 | 0        | Verrucomicrobiota     | 0        | 1.80E-05 | 0        | 7.30E-05 | 4.60E-04 |
| 0        | 0        | 0        | 0        | 0        | 0        | 0        | Deinococcota          | 0        | 0        | 0        | 0        | 0        |
| 0        | 0        | 0        | 0        | 0        | 0        | 0        | Chloroflexi           | 0        | 0        | 0        | 0        | 5.70E-05 |
| 0        | 0        | 0        | 0        | 0        | 0        | 0        | Elusimicrobiota       | 0        | 0        | 0        | 0        | 0        |
| 0        | 0        | 0        | 0        | 0        | 0        | 0        | Planctomycetota       | 0        | 0        | 0        | 0        | 4.60E-04 |























| H070     | H017     | H063     | H101     | H149     |
|----------|----------|----------|----------|----------|
| 0.160249 | 0.160059 | 0.148999 | 0.133677 | 0.115233 |
| 0.229192 | 0.096519 | 0.131764 | 0.235405 | 0.227664 |
| 0.426412 | 0.637032 | 0.570739 | 0.50221  | 0.537353 |
| 0.131003 | 0.06548  | 0.054591 | 0.034575 | 0.071831 |
| 0.038133 | 0.02379  | 0.06789  | 0.078447 | 0.029715 |
| 0.005259 | 0.01067  | 0.017611 | 0.004079 | 0.005187 |
| 0.008794 | 0.001947 | 0.006046 | 0.006282 | 0.004916 |
| 7.38E-04 | 0.003968 | 0.001855 | 0.004248 | 0.005052 |
| 2.20E-04 | 2.80E-05 | 0        | 0        | 2.41E-04 |
| 0        | 3.84E-04 | 2.50E-04 | 9.83E-04 | 0.001795 |
| 0        | 1.23E-04 | 0        | 7.40E-05 | 9.09E-04 |
| 0        | 0        | 2.55E-04 | 2.00E-05 | 3.40E-05 |
| 0        | 0        | 0        | 0        | 0        |
| 0        | 0        | 0        | 0        | 0        |
| 0        | 0        | 0        | 0        | 0        |
| 0        | 0        | 0        | 0        | 7.00E-05 |
| 0        | 0        | 0        | 0        | 0        |
| 0        | 0        | 0        | 0        | 0        |





|                                 |          |          |          |          |          |          |          |          |          |          |          |
|---------------------------------|----------|----------|----------|----------|----------|----------|----------|----------|----------|----------|----------|
| F0058                           | 0        | 0        | 0        | 0        | 0.006291 | 0        | 2.10E-05 | 0        | 0        | 2.30E-05 | 0        |
| Sphingomonas                    | 0        | 0        | 0        | 0        | 0        | 0        | 0        | 0        | 0        | 0        | 0        |
| Bifidobacterium                 | 0        | 0        | 0        | 0        | 0        | 2.80E-05 | 0        | 5.30E-05 | 0        | 0        | 0        |
| Kingella                        | 0        | 8.70E-05 | 0        | 0        | 0        | 0        | 1.78E-04 | 0        | 0        | 0        | 0        |
| Lactobacillus                   | 3.32E-04 | 0        | 0        | 1.50E-05 | 0        | 0        | 0        | 0        | 0        | 2.40E-05 | 0        |
| Roseburia                       | 0        | 0        | 0        | 0        | 0        | 0        | 0        | 0        | 0        | 0        | 0        |
| Leptotrichiaceae_uncultured     | 0        | 0        | 0        | 0        | 0        | 0        | 0        | 0        | 0        | 0        | 0        |
| Amnipila                        | 0        | 0        | 0        | 0        | 0        | 0        | 0.00119  | 0        | 0        | 0        | 0        |
| Bacteria_unclassified           | 0        | 0.001027 | 3.54E-04 | 2.21E-04 | 3.90E-05 | 2.21E-04 | 2.36E-04 | 7.23E-04 | 0.002686 | 2.23E-04 | 1.00E-04 |
| Actinobacteria_unclassified     | 0        | 0.001537 | 0.00112  | 3.36E-04 | 0        | 0.001047 | 5.01E-04 | 0.003777 | 0.002167 | 2.10E-05 | 8.08E-04 |
| Megamonas                       | 0        | 0        | 0        | 0        | 0        | 0        | 0        | 0        | 0        | 0        | 0        |
| Scardovia                       | 0        | 8.20E-05 | 0        | 0        | 0        | 4.04E-04 | 2.80E-05 | 0        | 0        | 3.21E-04 | 0        |
| Butyrivibrio                    | 0        | 0        | 0        | 0        | 0        | 4.64E-04 | 0.001162 | 0        | 1.32E-04 | 2.87E-04 | 0        |
| Pelagibacterium                 | 0        | 0        | 0        | 0        | 0        | 9.00E-05 | 4.30E-05 | 0        | 0        | 0        | 0        |
| [Eubacterium]_ruminantium_group | 0        | 0        | 0        | 0        | 0        | 0        | 0        | 0        | 0        | 0        | 0        |
| Burkholderiales_unclassified    | 0        | 0        | 0        | 0        | 0        | 0        | 4.60E-05 | 5.80E-05 | 1.18E-04 | 0        | 0        |
| Shuttleworthia                  | 0        | 0        | 8.50E-05 | 0        | 0        | 8.40E-04 | 0        | 0        | 0        | 0.002874 | 0        |
| Selenomonadaceae_uncultured     | 0        | 0        | 0        | 0        | 0        | 0        | 0        | 0        | 0        | 0        | 0        |
| Christensenellaceae_R-7_group   | 0        | 0        | 0        | 0        | 0        | 0        | 0        | 0        | 0        | 0        | 0        |
| Gracilibacteria                 | 0        | 0        | 0        | 0        | 0        | 0        | 0        | 0        | 0        | 0        | 0        |
| Helicobacter                    | 0        | 0        | 0        | 0        | 0        | 0        | 0        | 0        | 0        | 0        | 0        |
| Prevotellaceae_NK3B31_group     | 0        | 0        | 0        | 0        | 0        | 0        | 0        | 0        | 0        | 0        | 0        |
| Acholeplasma                    | 0        | 0        | 0        | 0        | 0        | 0        | 0        | 0        | 0        | 0        | 0        |
| Xanthomonadaceae_unclassified   | 0        | 0        | 0        | 0        | 0        | 1.03E-04 | 3.00E-05 | 0        | 0        | 0        | 0        |
| Phascolarctobacterium           | 0        | 0        | 0        | 0        | 0        | 0        | 0        | 0        | 0        | 0        | 0        |
| Rhizobiaceae_unclassified       | 0        | 0        | 0        | 1.10E-05 | 0        | 1.67E-04 | 3.70E-05 | 0        | 0        | 0        | 0        |
| Serratia                        | 0        | 0        | 0        | 0        | 0        | 0        | 0        | 0        | 0        | 0        | 0        |
| Chloroplast                     | 0        | 0        | 0        | 0        | 0        | 0        | 0        | 0        | 0        | 2.01E-04 | 0        |
| Mucispirillum                   | 0        | 0        | 0        | 0        | 0        | 0        | 0        | 0        | 0        | 0        | 0        |
| Propionibacterium               | 0        | 0        | 0        | 0        | 0        | 2.00E-05 | 0        | 0        | 0        | 0        | 0        |
| Others                          | 0        | 5.01E-04 | 2.63E-04 | 0.001222 | 0.00569  | 0.00164  | 0.005137 | 0.001738 | 0.001923 | 0.008446 | 0.001012 |

| CC23     | CC33     | CC56     | CC66     | CC02     | CC01     | CC72     | CC29     | CC17     | CC41     | CC44     | CC40     | CC08     |
|----------|----------|----------|----------|----------|----------|----------|----------|----------|----------|----------|----------|----------|
| 0.324891 | 0.314679 | 0.314387 | 0.303656 | 0.272016 | 0.261168 | 0.252413 | 0.251753 | 0.240955 | 0.232602 | 0.216897 | 0.204899 | 0.19955  |
| 0.5029   | 0.00462  | 7.73E-04 | 0.035194 | 5.30E-04 | 0.009157 | 0.077688 | 0.020225 | 0.001427 | 0.408071 | 0.091353 | 0.329016 | 0.001715 |
| 0.015429 | 0.103492 | 0.020378 | 0.26907  | 0.031288 | 0.003805 | 0.047749 | 0.162845 | 0.018697 | 0.061987 | 0.188636 | 0.011771 | 5.06E-04 |
| 0.042081 | 0.03254  | 0.22669  | 0.186417 | 0.180337 | 0.195675 | 0.0289   | 0.05186  | 0.154233 | 0.034127 | 0.075722 | 0.162678 | 0.211957 |
| 0.014453 | 0.472303 | 0.215677 | 0.03695  | 0.054877 | 0.491052 | 0.137554 | 0.098235 | 0.23083  | 0.170592 | 0.185432 | 0.049331 | 0.32818  |
| 0.057151 | 0.001006 | 1.33E-04 | 0.016056 | 0.030034 | 8.13E-04 | 0.128684 | 0.004748 | 0.00559  | 0.001345 | 0.02043  | 3.11E-04 | 2.06E-04 |
| 2.78E-04 | 8.31E-04 | 2.70E-04 | 0.004484 | 0.014985 | 1.34E-04 | 0.009701 | 0.00499  | 7.28E-04 | 0.003487 | 0.00145  | 0.002045 | 0        |
| 9.37E-04 | 7.96E-04 | 1.66E-04 | 0.003763 | 7.80E-05 | 6.88E-04 | 0.012226 | 0.00145  | 7.18E-04 | 0.005384 | 0.016125 | 0.022011 | 5.70E-05 |
| 3.45E-04 | 0.001504 | 5.84E-04 | 0.001808 | 7.70E-05 | 8.37E-04 | 0.131644 | 8.59E-04 | 0.002978 | 0.001651 | 0.022869 | 0.015967 | 2.80E-05 |
| 0.016204 | 0.018064 | 0.183491 | 0.05462  | 0.018513 | 0.012591 | 0.013662 | 0.238293 | 0.035807 | 0.016784 | 0.081073 | 0.030903 | 0.238252 |
| 0.00555  | 0.008526 | 0.011995 | 0.00663  | 0.18693  | 0.002254 | 0.019779 | 0.019699 | 5.59E-04 | 0.010712 | 0.008603 | 0.013251 | 4.80E-04 |
| 3.67E-04 | 1.26E-04 | 0        | 7.12E-04 | 0.001116 | 1.34E-04 | 0.013257 | 9.81E-04 | 3.61E-04 | 1.25E-04 | 0.004454 | 0.013337 | 0        |
| 0        | 0.006591 | 1.56E-04 | 0.003439 | 2.30E-05 | 0        | 0.013216 | 0.03289  | 0.002922 | 0.003686 | 0.019422 | 0.001216 | 9.70E-05 |
| 0.003228 | 0.004316 | 0.002888 | 0.003217 | 0.07151  | 0.002359 | 0.010126 | 0.014532 | 0.011581 | 0.003377 | 0.006673 | 0.003895 | 0.008754 |
| 6.50E-05 | 7.43E-04 | 0.001725 | 0.012155 | 0        | 1.41E-04 | 0.014732 | 8.52E-04 | 0.003544 | 7.08E-04 | 0.008049 | 0.002061 | 4.47E-04 |
| 0.002348 | 5.12E-04 | 3.01E-04 | 7.65E-04 | 0.050813 | 7.80E-04 | 0.006422 | 0.004399 | 6.82E-04 | 0.001886 | 0.003443 | 6.29E-04 | 5.81E-04 |
| 3.59E-04 | 0.002941 | 4.80E-05 | 0.002173 | 0.001161 | 0.001503 | 0.01504  | 0.001288 | 0.014116 | 0.001475 | 0.001159 | 0.027255 | 1.29E-04 |
| 0        | 2.03E-04 | 4.00E-05 | 4.30E-05 | 0.004238 | 1.30E-04 | 0.004866 | 0.00228  | 0.009998 | 0        | 0.001802 | 0.029917 | 2.70E-05 |
| 0        | 0        | 0        | 0        | 0        | 0        | 0        | 0        | 0        | 0        | 0        | 0        | 0        |
| 0        | 0        | 0        | 7.90E-05 | 0        | 0        | 0.00827  | 1.90E-05 | 0        | 0        | 0        | 0        | 0        |
| 0        | 1.76E-04 | 1.78E-04 | 3.01E-04 | 3.75E-04 | 7.89E-04 | 0.001216 | 8.90E-05 | 0.003847 | 0.001761 | 0.001108 | 1.21E-04 | 0        |
| 5.30E-05 | 1.22E-04 | 0        | 0.001343 | 0        | 0        | 1.17E-04 | 0        | 0        | 0        | 0        | 0        | 0        |
| 8.95E-04 | 3.50E-04 | 2.81E-04 | 0.00894  | 0.032313 | 0.001487 | 0.003015 | 0.006934 | 0.012232 | 0.002899 | 0.001498 | 0.001432 | 3.02E-04 |
| 0.0015   | 0        | 1.16E-04 | 0.001298 | 0.007411 | 1.40E-04 | 0.00499  | 0.002156 | 0.006757 | 8.51E-04 | 0.002202 | 1.36E-04 | 3.60E-05 |
| 2.54E-04 | 0.010227 | 0.005463 | 0.004362 | 0.00283  | 0.004421 | 8.02E-04 | 0.025929 | 0.02542  | 0.003875 | 0.00189  | 0.011321 | 2.04E-04 |
| 0        | 0        | 0        | 0        | 1.02E-04 | 0        | 0        | 6.70E-05 | 0.034363 | 0        | 0        | 2.10E-05 | 0        |
| 0.004914 | 1.62E-04 | 4.07E-04 | 0.003318 | 0.003302 | 0        | 0.005223 | 0.003359 | 0.005327 | 7.22E-04 | 4.45E-04 | 0.00354  | 8.31E-04 |
| 5.40E-05 | 7.10E-04 | 1.97E-04 | 0.001212 | 1.02E-04 | 0.001467 | 2.63E-04 | 7.13E-04 | 0.004934 | 0.00118  | 0.00107  | 1.50E-05 | 0.002851 |
| 1.84E-04 | 4.93E-04 | 0.007137 | 0.004482 | 0.008869 | 0.003483 | 8.97E-04 | 2.63E-04 | 0.021854 | 0.001355 | 0        | 0.00468  | 0.002644 |
| 2.41E-04 | 0.002432 | 2.39E-04 | 0.003882 | 8.30E-05 | 0        | 3.08E-04 | 0.008376 | 0.012774 | 0        | 2.76E-04 | 6.96E-04 | 2.50E-05 |
| 0        | 0        | 0        | 0        | 0        | 0        | 0        | 0        | 0        | 0        | 0        | 6.10E-05 | 2.20E-05 |
| 0        | 0.001827 | 0        | 2.30E-05 | 3.00E-05 | 0        | 6.52E-04 | 0.001903 | 0.003895 | 0.008529 | 0        | 2.50E-05 | 0        |
| 7.69E-04 | 4.33E-04 | 3.43E-04 | 0.001942 | 0.005547 | 9.28E-04 | 0.003276 | 0.010602 | 0.005232 | 3.56E-04 | 0.00227  | 1.90E-05 | 9.10E-05 |
| 3.12E-04 | 4.27E-04 | 5.90E-04 | 0.002378 | 0.010417 | 6.73E-04 | 0.003052 | 0.001764 | 0.011516 | 3.66E-04 | 4.87E-04 | 0.003869 | 0.001196 |
| 0        | 5.50E-05 | 0        | 7.30E-05 | 0        | 0        | 4.10E-05 | 1.60E-05 | 0        | 9.92E-04 | 0        | 0        | 0        |
| 0        | 0        | 0        | 0        | 2.30E-05 | 0        | 0        | 0        | 2.50E-04 | 0        | 0        | 0        | 0        |
| 0        | 2.48E-04 | 2.04E-04 | 4.56E-04 | 0.001125 | 7.02E-04 | 4.51E-04 | 0.001366 | 1.80E-05 | 0        | 0.001885 | 0        | 0        |
| 0        | 1.03E-04 | 0        | 2.64E-04 | 0        | 0        | 3.14E-04 | 3.30E-05 | 2.60E-05 | 1.03E-04 | 1.07E-04 | 4.90E-05 | 0        |
| 0        | 5.20E-05 | 0        | 9.10E-05 | 0        | 0        | 0.001853 | 1.86E-04 | 0.002643 | 0        | 4.50E-05 | 0        | 0        |
| 0        | 0        | 0        | 0        | 1.17E-04 | 0        | 0        | 7.80E-05 | 0.014375 | 0        | 1.56E-04 | 6.10E-05 | 0        |
| 1.03E-04 | 0        | 4.10E-05 | 0        | 1.93E-04 | 1.29E-04 | 1.25E-04 | 6.40E-05 | 0.003308 | 0        | 2.94E-04 | 0        | 0        |
| 5.96E-04 | 2.92E-04 | 4.70E-05 | 9.60E-05 | 0        | 0        | 1.51E-04 | 1.62E-04 | 1.50E-04 | 0.006417 | 0.002015 | 0.014013 | 0        |
| 0        | 5.10E-05 | 0        | 2.75E-04 | 0        | 0        | 0.003355 | 0        | 3.74E-04 | 0        | 0        | 0        | 0        |
| 3.60E-04 | 8.26E-04 | 8.77E-04 | 0.004354 | 4.30E-05 | 1.28E-04 | 0.002728 | 0.006398 | 0        | 0.001133 | 0.005366 | 0        | 2.25E-04 |
| 0        | 0        | 0        | 2.50E-05 | 8.40E-05 | 0        | 9.40E-05 | 4.40E-05 | 2.10E-05 | 1.06E-04 | 1.61E-04 | 0        | 0        |
| 0        | 5.70E-05 | 0        | 1.39E-04 | 5.15E-04 | 1.33E-04 | 0.001254 | 8.20E-05 | 3.00E-05 | 0        | 6.70E-05 | 0.001632 | 0        |
| 0        | 0        | 0        | 0        | 2.40E-05 | 0        | 0        | 4.60E-05 | 1.13E-04 | 0        | 0        | 3.60E-05 | 3.00E-05 |
| 0        | 0        | 4.30E-05 | 0        | 0        | 0        | 3.11E-04 | 0        | 7.40E-05 | 1.21E-04 | 2.12E-04 | 1.30E-05 | 0        |
| 0        | 0        | 0        | 0        | 0        | 0        | 3.10E-05 | 0.002664 | 4.90E-05 | 0        | 6.40E-05 | 3.30E-05 | 0        |
| 0        | 5.50E-05 | 0        | 8.70E-05 | 5.88E-04 | 0        | 0.006444 | 2.41E-04 | 0        | 1.31E-04 | 0        | 0.019792 | 0        |
| 0        | 0        | 0        | 4.63E-04 | 0        | 0        | 5.78E-04 | 0        | 0        | 1.23E-04 | 0        | 0        | 0        |
| 0        | 1.87E-04 | 5.42E-04 | 0.005422 | 2.50E-05 | 1.34E-04 | 6.20E-05 | 6.40E-05 | 0.004364 | 1.25E-04 | 0        | 0        | 0        |
| 0        | 0        | 0        | 0        | 0        | 0        | 0        | 0        | 0.00177  | 0        | 5.20E-05 | 3.20E-05 | 0        |
| 0        | 0        | 0        | 0        | 0        | 0        | 0        | 0        | 0.002052 | 0        | 0        | 0        | 0        |
| 0        | 1.23E-04 | 0        | 2.27E-04 | 0        | 0        | 2.51E-04 | 8.60E-05 | 3.54E-04 | 1.34E-04 | 3.83E-04 | 0        | 0        |
| 0        | 0        | 0        | 0        | 0        | 0        | 0        | 0        | 2.00E-05 | 0        | 0        | 7.90E-05 | 0        |

|          |          |          |          |          |          |          |          |          |          |          |          |          |
|----------|----------|----------|----------|----------|----------|----------|----------|----------|----------|----------|----------|----------|
| 0        | 0        | 0        | 6.30E-05 | 3.80E-05 | 0        | 1.00E-04 | 2.20E-05 | 2.20E-05 | 0        | 6.30E-05 | 0        | 0        |
| 0        | 0        | 0        | 0        | 0        | 0        | 0        | 0        | 2.70E-05 | 0        | 0        | 0        | 0        |
| 0        | 0        | 2.58E-04 | 4.08E-04 | 0        | 0        | 0        | 6.30E-05 | 0.008373 | 0        | 1.01E-04 | 0        | 0        |
| 0        | 0        | 0        | 8.10E-05 | 0        | 0        | 5.70E-05 | 0        | 2.90E-05 | 0        | 1.09E-04 | 0.008858 | 0        |
| 0        | 0        | 3.40E-05 | 0        | 2.10E-05 | 0        | 0        | 4.20E-05 | 0.001086 | 1.16E-04 | 0        | 1.30E-05 | 5.70E-05 |
| 0        | 0        | 0        | 0        | 1.05E-04 | 0        | 0        | 3.30E-05 | 0.005423 | 0        | 5.60E-05 | 0        | 0        |
| 0        | 0        | 0        | 0        | 0        | 0        | 0        | 0        | 0        | 0        | 0        | 0        | 0        |
| 7.30E-05 | 0        | 0        | 0        | 0        | 0        | 0        | 1.70E-05 | 0        | 0        | 0        | 1.80E-05 | 0        |
| 4.29E-04 | 9.83E-04 | 3.88E-04 | 9.63E-04 | 2.30E-04 | 2.77E-04 | 2.85E-04 | 8.45E-04 | 0        | 3.66E-04 | 0.001175 | 0        | 0        |
| 5.73E-04 | 6.78E-04 | 0.002082 | 0.00406  | 2.20E-05 | 2.71E-04 | 8.60E-05 | 0.005371 | 0        | 0.001849 | 0.008446 | 0        | 2.80E-04 |
| 0        | 0        | 0        | 0        | 4.50E-05 | 0        | 0        | 1.40E-05 | 0.001696 | 0        | 0        | 7.00E-06 | 0        |
| 0        | 0        | 0        | 0        | 0        | 0        | 0        | 1.23E-04 | 1.80E-05 | 0        | 9.70E-05 | 0        | 0        |
| 1.29E-04 | 0.001035 | 0        | 3.40E-04 | 0.003521 | 1.30E-04 | 5.90E-05 | 3.06E-04 | 0.008132 | 1.35E-04 | 1.73E-04 | 3.50E-05 | 0        |
| 0        | 0        | 0        | 3.00E-05 | 4.95E-04 | 0        | 4.02E-04 | 2.17E-04 | 4.57E-04 | 0        | 5.50E-05 | 0.001527 | 0        |
| 0        | 0        | 0        | 0        | 0        | 0        | 0        | 0        | 2.46E-04 | 0        | 0        | 0        | 0        |
| 4.42E-04 | 6.38E-04 | 4.10E-05 | 0.001893 | 0        | 0        | 2.40E-05 | 3.10E-04 | 0        | 0.002996 | 0.004528 | 0        | 2.40E-05 |
| 0        | 1.67E-04 | 0        | 3.08E-04 | 0        | 0        | 0        | 1.60E-05 | 0.001487 | 0.001712 | 2.36E-04 | 2.10E-05 | 2.60E-05 |
| 0        | 0        | 0        | 2.16E-04 | 0        | 0        | 0        | 0        | 0        | 0        | 0        | 0        | 0        |
| 0        | 0        | 0        | 0        | 0        | 0        | 0        | 0        | 8.11E-04 | 0        | 0        | 0        | 0        |
| 0        | 0        | 0        | 1.02E-04 | 0        | 0        | 0        | 0        | 0        | 0        | 0        | 0        | 0        |
| 0        | 0        | 0        | 0        | 0        | 0        | 0        | 0        | 2.00E-05 | 0        | 0        | 0        | 0        |
| 0        | 0        | 0        | 0        | 0        | 0        | 0        | 0        | 2.90E-05 | 0        | 0        | 0        | 0        |
| 0        | 0        | 0        | 0        | 0        | 0        | 0        | 0        | 0        | 0        | 0        | 0        | 0        |
| 0        | 0        | 0        | 8.40E-05 | 1.25E-04 | 1.39E-04 | 4.17E-04 | 2.69E-04 | 3.46E-04 | 0        | 0        | 0.001533 | 0        |
| 0        | 0        | 0        | 0        | 2.90E-05 | 0        | 0        | 0        | 0.001017 | 0        | 0        | 0        | 0        |
| 0        | 0        | 0        | 0        | 2.23E-04 | 0        | 2.48E-04 | 3.41E-04 | 4.59E-04 | 0        | 1.78E-04 | 0.001103 | 0        |
| 0        | 0        | 0        | 0        | 2.30E-05 | 0        | 3.50E-05 | 3.70E-05 | 4.50E-05 | 0        | 0        | 1.17E-04 | 0        |
| 0        | 0        | 0        | 0        | 2.50E-05 | 0        | 0        | 0        | 7.84E-04 | 0        | 5.20E-05 | 2.00E-05 | 0        |
| 0        | 0        | 0        | 0        | 0        | 0        | 0        | 0        | 0        | 0        | 0        | 0        | 0        |
| 0        | 0        | 0        | 0        | 0        | 0        | 0        | 0        | 0        | 0        | 0        | 0        | 0        |
| 0.001533 | 0.003298 | 7.90E-04 | 0.004768 | 0.002454 | 0.001348 | 0.010504 | 0.006091 | 0.055625 | 0.003548 | 0.009086 | 0.004579 | 1.90E-04 |

| CC61     | CC54     | CC34     | CC48     | CC31     | CC09     | CC70     | CC18     | CC04     | CC67     | CC15     | CC10     | CC69     |
|----------|----------|----------|----------|----------|----------|----------|----------|----------|----------|----------|----------|----------|
| 0.192295 | 0.177073 | 0.159755 | 0.149235 | 0.13598  | 0.127817 | 0.113815 | 0.105027 | 0.099062 | 0.09836  | 0.096842 | 0.096125 | 0.09154  |
| 0.112968 | 0.001545 | 0.070666 | 7.75E-04 | 0.002496 | 0.00664  | 0.48627  | 1.61E-04 | 3.53E-04 | 0.03792  | 0.002132 | 0.067052 | 0.569753 |
| 0.224938 | 0.027236 | 0.133463 | 0.005366 | 0.036673 | 0.023566 | 0.027996 | 0.305548 | 0.252002 | 0.630452 | 0.034168 | 0.083109 | 0.032161 |
| 0.174371 | 0.166704 | 0.021506 | 0.309109 | 0.005949 | 0.073862 | 0.111282 | 0.01019  | 0.242131 | 0.032028 | 0.428454 | 0.172684 | 0.039724 |
| 0.010534 | 0.173238 | 0.051547 | 3.09E-04 | 0.688922 | 0.399263 | 0.031557 | 0.001817 | 0.078583 | 0.036119 | 0.035393 | 0.019084 | 0.004027 |
| 0.001114 | 0.002029 | 0.030139 | 1.17E-04 | 0.07169  | 0.091465 | 0.036432 | 0.015099 | 0.155484 | 0.002922 | 8.60E-05 | 0.002229 | 0.107078 |
| 0.001198 | 0.002294 | 0.010999 | 3.40E-05 | 8.71E-04 | 8.07E-04 | 0.001078 | 7.48E-04 | 2.18E-04 | 0.001939 | 5.60E-05 | 0.02624  | 0.001543 |
| 2.45E-04 | 7.44E-04 | 0.090217 | 0.306825 | 0.001752 | 0.003434 | 0.020049 | 0.023017 | 0.001217 | 0.002834 | 1.00E-04 | 0.03321  | 0.05184  |
| 0.010062 | 1.94E-04 | 0.004298 | 2.00E-04 | 2.24E-04 | 0.001696 | 0.002939 | 0.001061 | 0.01016  | 0.004892 | 4.40E-05 | 0.005112 | 0.004311 |
| 0.007739 | 0.261941 | 0.032339 | 0.020016 | 0.008479 | 0.013374 | 0.00356  | 0.027543 | 0.009839 | 0.04048  | 0.143786 | 0.054712 | 0.004299 |
| 0.025313 | 0.009582 | 0.014729 | 0.012439 | 0.007938 | 1.40E-04 | 0.01949  | 0.149985 | 0.01359  | 0.023864 | 0.021772 | 0.081398 | 0.038063 |
| 0.005844 | 0.002141 | 0.070416 | 1.16E-04 | 6.00E-05 | 0.029619 | 0.002532 | 0.065003 | 0.001592 | 8.28E-04 | 0.004906 | 0.055502 | 0.003036 |
| 0.107186 | 0.004478 | 0.02984  | 2.80E-05 | 0.001929 | 0.005798 | 0        | 0.113569 | 0.01973  | 0.015244 | 0.006255 | 0        | 8.05E-04 |
| 0.001823 | 0.026952 | 0.010239 | 1.14E-04 | 0.002877 | 0.128736 | 0.004924 | 0.005358 | 0.009039 | 0.00179  | 0        | 0.001593 | 0.012988 |
| 0        | 0.007415 | 0.059284 | 0        | 6.67E-04 | 0.014515 | 0        | 0.001231 | 9.90E-04 | 0.001834 | 0        | 7.10E-05 | 0.001428 |
| 0.032267 | 8.51E-04 | 0.014826 | 8.70E-05 | 7.90E-04 | 0.005296 | 0.023013 | 0.020839 | 0.070428 | 0.003559 | 0.13722  | 0.02631  | 0.001353 |
| 0.017476 | 0.009002 | 6.63E-04 | 0.08024  | 9.27E-04 | 0.001854 | 0.048493 | 0.003044 | 0.001384 | 5.71E-04 | 0.007317 | 0.007767 | 1.88E-04 |
| 0.015764 | 8.80E-05 | 1.70E-05 | 0.02989  | 2.24E-04 | 0.003015 | 0.003978 | 0.006785 | 0        | 0        | 0        | 0.18784  | 6.50E-05 |
| 0        | 0        | 0        | 0        | 0        | 0        | 0        | 0        | 0        | 0        | 0        | 0        | 0        |
| 0        | 0        | 9.10E-05 | 2.30E-05 | 0        | 3.20E-05 | 0        | 0        | 0        | 3.28E-04 | 0        | 0        | 5.90E-05 |
| 3.80E-05 | 1.15E-04 | 5.28E-04 | 0        | 0        | 1.08E-04 | 0.007378 | 1.90E-05 | 6.00E-05 | 0.001171 | 0.004731 | 7.10E-05 | 0.00335  |
| 2.10E-05 | 0        | 0.007509 | 2.50E-05 | 5.90E-05 | 4.00E-05 | 0        | 2.00E-06 | 0        | 2.04E-04 | 0        | 2.71E-04 | 6.37E-04 |
| 0.001116 | 0.01376  | 0.023828 | 2.20E-05 | 0.001379 | 0.007702 | 6.90E-05 | 0.006587 | 4.74E-04 | 5.96E-04 | 9.70E-05 | 0        | 0.002655 |
| 0        | 6.72E-04 | 0.035642 | 7.80E-05 | 0.001358 | 0.006822 | 0.002935 | 0.005458 | 0.004825 | 1.52E-04 | 0        | 0.004149 | 0.00445  |
| 0.005503 | 0.011716 | 0.002456 | 0.001906 | 0.005105 | 5.68E-04 | 0.005649 | 0.02852  | 2.50E-05 | 0.005824 | 0        | 2.78E-04 | 2.44E-04 |
| 2.40E-05 | 0        | 4.40E-05 | 1.19E-04 | 0        | 0        | 0        | 2.90E-05 | 0        | 0        | 9.60E-05 | 0.001424 | 0        |
| 7.57E-04 | 0.001964 | 0.005148 | 0        | 6.40E-04 | 0.003124 | 0.003653 | 6.72E-04 | 0.002002 | 6.10E-04 | 0.002187 | 3.89E-04 | 9.47E-04 |
| 6.65E-04 | 0.011622 | 0.014803 | 2.00E-05 | 8.65E-04 | 0.024529 | 7.21E-04 | 0.011723 | 0.007423 | 2.63E-04 | 3.90E-05 | 0        | 0.00291  |
| 0.013434 | 0.008948 | 7.93E-04 | 0.001974 | 3.01E-04 | 0        | 0.002374 | 4.30E-05 | 0.001178 | 5.40E-05 | 0        | 0.001081 | 1.02E-04 |
| 3.30E-05 | 0.045238 | 0.01053  | 6.20E-05 | 0.002243 | 0        | 0        | 2.77E-04 | 0.003023 | 0.002927 | 0        | 0        | 9.50E-04 |
| 1.12E-04 | 0        | 0        | 4.26E-04 | 0        | 0        | 7.00E-05 | 7.60E-05 | 2.80E-05 | 0        | 5.50E-05 | 5.51E-04 | 0        |
| 0        | 0.017326 | 0.011508 | 0        | 6.24E-04 | 0.001469 | 0        | 0        | 0        | 0.001861 | 0        | 3.20E-05 | 0        |
| 0.003939 | 5.81E-04 | 0.008211 | 2.80E-05 | 0.001698 | 0.006611 | 4.80E-05 | 3.40E-05 | 0.002639 | 3.04E-04 | 0        | 6.89E-04 | 0.001958 |
| 0.023502 | 0.002172 | 0.005461 | 0        | 1.85E-04 | 0.001994 | 0.001227 | 0.011128 | 8.06E-04 | 0.00131  | 0.040454 | 2.14E-04 | 3.24E-04 |
| 4.00E-05 | 0        | 1.18E-04 | 0        | 0        | 0        | 0        | 0        | 0        | 2.44E-04 | 0        | 0        | 5.90E-05 |
| 0        | 0        | 0        | 0        | 0        | 0        | 0        | 0        | 0        | 0        | 0        | 0        | 0        |
| 2.00E-05 | 4.40E-05 | 0.019298 | 7.50E-05 | 0.008905 | 1.80E-05 | 2.40E-05 | 0.001858 | 0.001652 | 5.14E-04 | 0        | 0.001958 | 0.002346 |
| 1.50E-05 | 5.50E-05 | 2.60E-05 | 0        | 0        | 0        | 0.024022 | 0.001336 | 2.50E-05 | 7.29E-04 | 0        | 0        | 1.19E-04 |
| 2.48E-04 | 5.30E-05 | 8.70E-04 | 0        | 1.49E-04 | 5.71E-04 | 2.90E-05 | 0.007504 | 4.00E-05 | 2.80E-05 | 0        | 0        | 0        |
| 3.80E-05 | 0        | 0        | 4.70E-05 | 0        | 0        | 0        | 9.00E-06 | 5.40E-05 | 0        | 4.60E-05 | 6.34E-04 | 0        |
| 0        | 2.00E-04 | 1.59E-04 | 0        | 3.46E-04 | 4.71E-04 | 0        | 1.27E-04 | 0        | 0        | 0        | 1.26E-04 | 3.49E-04 |
| 0.002729 | 5.50E-05 | 7.26E-04 | 0.008543 | 3.27E-04 | 2.90E-05 | 0.003803 | 0.001227 | 0        | 3.27E-04 | 0        | 0        | 2.72E-04 |
| 0        | 0        | 0.004093 | 2.10E-05 | 0        | 0        | 0        | 0.003994 | 0        | 7.04E-04 | 0        | 3.40E-05 | 0        |
| 1.90E-05 | 0.001483 | 0.001217 | 0        | 9.70E-04 | 6.80E-05 | 0        | 5.51E-04 | 3.60E-05 | 0.012865 | 0.001097 | 0        | 0.001247 |
| 7.10E-05 | 4.10E-05 | 0.003745 | 0        | 0        | 0        | 0        | 3.30E-05 | 6.45E-04 | 0        | 0        | 5.00E-05 | 0.001114 |
| 2.71E-04 | 0        | 6.17E-04 | 0        | 0        | 3.88E-04 | 3.58E-04 | 6.20E-05 | 7.73E-04 | 3.40E-05 | 0        | 0.004069 | 2.06E-04 |
| 7.90E-05 | 0        | 0        | 1.97E-04 | 0        | 3.80E-05 | 0        | 3.10E-05 | 0        | 0        | 5.00E-05 | 0.001183 | 0        |
| 1.19E-04 | 5.30E-05 | 0.016822 | 0        | 0        | 0.004535 | 0        | 0.003681 | 0        | 5.40E-05 | 0        | 0        | 9.36E-04 |
| 1.70E-05 | 9.20E-05 | 0        | 8.80E-05 | 0        | 3.60E-05 | 0.002216 | 0.002202 | 0        | 2.90E-05 | 0        | 0        | 5.30E-05 |
| 0        | 0        | 3.10E-05 | 2.50E-05 | 0        | 0        | 0        | 0        | 1.30E-04 | 2.30E-04 | 0.001206 | 0.011008 | 3.11E-04 |
| 0        | 8.20E-05 | 3.92E-04 | 0        | 3.01E-04 | 0        | 0        | 1.70E-05 | 0        | 0        | 0        | 0        | 0.001082 |
| 1.39E-04 | 3.55E-04 | 1.02E-04 | 0        | 3.97E-04 | 2.80E-05 | 0        | 2.18E-04 | 0        | 2.74E-04 | 0        | 4.91E-04 | 0        |
| 0        | 0        | 0        | 0        | 0        | 0        | 0        | 0        | 0        | 0        | 0        | 2.20E-05 | 0        |
| 0        | 0        | 0        | 0        | 0        | 0        | 0        | 0        | 0        | 0        | 0        | 2.80E-05 | 0        |
| 0        | 1.86E-04 | 2.74E-04 | 6.40E-05 | 1.69E-04 | 0        | 0        | 0.001141 | 0        | 4.63E-04 | 0        | 0        | 0        |
| 3.60E-05 | 0        | 0        | 9.70E-05 | 0        | 0        | 0        | 1.70E-05 | 0        | 0        | 0        | 5.25E-04 | 0        |

|          |          |          |          |          |          |          |          |          |          |          |          |          |
|----------|----------|----------|----------|----------|----------|----------|----------|----------|----------|----------|----------|----------|
| 3.90E-05 | 0        | 6.62E-04 | 0        | 1.22E-04 | 0        | 0        | 0.001071 | 2.10E-05 | 2.60E-05 | 0        | 0.001177 | 0        |
| 0        | 0        | 0        | 0        | 0        | 0        | 0        | 1.20E-05 | 0        | 0        | 0        | 2.56E-04 | 0        |
| 2.10E-05 | 0        | 0        | 0        | 0        | 0        | 0        | 1.00E-05 | 0        | 0        | 0        | 3.93E-04 | 0        |
| 4.30E-05 | 0        | 0        | 0.064038 | 0        | 0        | 9.60E-05 | 0        | 0        | 1.32E-04 | 0        | 0        | 3.30E-05 |
| 3.90E-05 | 0        | 7.10E-05 | 0        | 0        | 0        | 0        | 0.005824 | 0        | 3.20E-05 | 0        | 0.001138 | 6.20E-05 |
| 0        | 0        | 0        | 0        | 0        | 0        | 0        | 0        | 0        | 0        | 0        | 3.75E-04 | 0        |
| 0        | 0        | 0        | 0        | 0        | 0        | 0        | 0        | 0        | 0        | 0        | 0        | 0        |
| 0        | 0        | 0.001563 | 0        | 2.15E-04 | 0.001775 | 0        | 0        | 0        | 1.71E-04 | 0        | 0        | 4.53E-04 |
| 1.80E-05 | 5.16E-04 | 6.67E-04 | 0        | 0.001159 | 6.40E-05 | 1.68E-04 | 0.003872 | 3.17E-04 | 0.006837 | 0        | 2.50E-05 | 0.0022   |
| 0        | 0.003442 | 7.15E-04 | 0        | 0.00142  | 0        | 2.20E-05 | 4.57E-04 | 0        | 0.012427 | 2.60E-05 | 0        | 4.69E-04 |
| 0        | 0        | 0        | 0        | 0        | 0        | 0        | 0        | 0        | 0        | 0        | 1.10E-04 | 0        |
| 0        | 0        | 4.20E-05 | 8.56E-04 | 0        | 0        | 4.50E-05 | 0.00124  | 0        | 0        | 0.029704 | 9.00E-05 | 0        |
| 0        | 1.80E-04 | 2.00E-05 | 0        | 5.12E-04 | 2.11E-04 | 0        | 1.23E-04 | 2.14E-04 | 2.40E-05 | 0        | 0        | 0        |
| 7.94E-04 | 4.60E-05 | 0        | 0.001517 | 0        | 5.11E-04 | 1.77E-04 | 3.81E-04 | 0        | 0        | 0        | 0.01417  | 0        |
| 0        | 0        | 0        | 0        | 0        | 0        | 0        | 0        | 0        | 0        | 0        | 0        | 0        |
| 1.60E-05 | 0        | 5.97E-04 | 0        | 6.30E-05 | 0        | 6.40E-04 | 0        | 0        | 0.006718 | 0        | 0        | 0.002556 |
| 1.02E-04 | 2.03E-04 | 3.54E-04 | 0        | 0        | 2.76E-04 | 2.00E-05 | 0.017112 | 0        | 3.70E-05 | 0        | 2.50E-05 | 0        |
| 0        | 1.47E-04 | 0        | 0        | 0        | 0        | 0        | 0        | 0        | 0        | 0        | 0        | 0        |
| 0        | 0        | 0        | 0        | 0        | 0        | 0        | 0        | 0        | 0        | 0        | 1.80E-04 | 4.00E-05 |
| 0        | 0        | 4.30E-05 | 0        | 0        | 0        | 0        | 0        | 0        | 0        | 0        | 0        | 5.90E-05 |
| 0        | 0        | 0        | 0        | 0        | 0        | 0        | 0        | 0        | 0        | 0        | 0        | 0        |
| 0        | 0        | 0        | 0        | 0        | 0        | 0        | 0        | 0        | 0        | 0        | 0        | 0        |
| 0        | 0        | 0        | 0        | 0        | 0        | 0        | 0        | 0        | 0        | 0        | 0        | 0        |
| 8.96E-04 | 0        | 0        | 0.00114  | 0        | 1.42E-04 | 3.27E-04 | 3.91E-04 | 0        | 0        | 0        | 0.00971  | 0        |
| 3.10E-05 | 0        | 0        | 0        | 0        | 0        | 0        | 0        | 0        | 0        | 0        | 4.82E-04 | 0        |
| 7.17E-04 | 0        | 0        | 8.71E-04 | 0        | 1.78E-04 | 1.77E-04 | 3.19E-04 | 0        | 4.10E-05 | 0        | 0.006634 | 0        |
| 0        | 0        | 0        | 1.70E-05 | 0        | 0        | 2.20E-05 | 5.00E-06 | 0        | 0        | 0        | 5.70E-05 | 0        |
| 0.001747 | 0        | 2.20E-05 | 0.001229 | 0        | 0        | 0.001357 | 4.54E-04 | 0        | 0        | 2.45E-04 | 1.03E-04 | 0        |
| 0        | 0        | 0        | 0        | 0        | 0        | 0        | 0        | 0        | 0        | 0        | 0        | 0        |
| 0        | 0        | 0        | 1.90E-05 | 0        | 0        | 2.40E-05 | 3.10E-05 | 0        | 0        | 0        | 0        | 0        |
| 0.001415 | 0.005146 | 0.015259 | 0.001573 | 0.00204  | 0.006765 | 0.004941 | 0.024097 | 0.007808 | 0.00582  | 0.001436 | 0.01576  | 0.003246 |

| CC59     | CC20     | CC37     | CC13     | CC71     | CC45     | CC38     | CC30     | CC25     | CC27     | CC60     | CC46     | CC57     |
|----------|----------|----------|----------|----------|----------|----------|----------|----------|----------|----------|----------|----------|
| 0.077326 | 0.069573 | 0.06545  | 0.064771 | 0.062549 | 0.059831 | 0.056623 | 0.055179 | 0.042724 | 0.042538 | 0.03756  | 0.037142 | 0.036046 |
| 0.217827 | 9.57E-04 | 0.246709 | 0.001354 | 0.089015 | 0.028616 | 5.46E-04 | 0.138098 | 0.370428 | 0.056327 | 0.025544 | 0.004042 | 0.032964 |
| 0.197324 | 0.040097 | 0.209709 | 0.112589 | 0.04533  | 0.441029 | 0.035343 | 0.149044 | 0.069127 | 0.466505 | 0.030685 | 0.435723 | 0.295832 |
| 0.045321 | 0.004572 | 0.124467 | 0.653314 | 0.047416 | 0.055456 | 0.860641 | 0.197094 | 0.09659  | 0.037522 | 0.028454 | 0.015411 | 0.048714 |
| 0.037901 | 0.06389  | 0.017757 | 0.00335  | 0.2356   | 0.03933  | 9.48E-04 | 0.274191 | 0.115868 | 0.094719 | 0.194908 | 0.010765 | 0.054419 |
| 0.0602   | 0.003467 | 0.012449 | 0        | 0.232251 | 0.00751  | 6.69E-04 | 0.007477 | 0.026165 | 0.040065 | 0.551247 | 0.004856 | 0.042217 |
| 0.006262 | 6.34E-04 | 8.85E-04 | 4.54E-04 | 7.76E-04 | 0.002663 | 7.60E-05 | 0.005183 | 0.001213 | 0.001468 | 8.10E-04 | 0.001399 | 0.003914 |
| 0.012852 | 0.001268 | 0.018193 | 0.060577 | 0.002683 | 0.057417 | 8.00E-05 | 0.001076 | 0.002413 | 0.036701 | 0.024294 | 0.025129 | 0.011537 |
| 0.027279 | 1.10E-04 | 0.006328 | 0.005639 | 0.136484 | 0.030606 | 2.28E-04 | 0.004374 | 0.002972 | 0.009132 | 6.29E-04 | 0.019244 | 0.021732 |
| 0.012906 | 0.601804 | 0.085924 | 0.001631 | 0.004158 | 0.011453 | 0.014419 | 0.07772  | 0.126735 | 0.012061 | 0.004541 | 0.004333 | 0.049164 |
| 0.045891 | 0.042043 | 0.034898 | 0.012721 | 0.031889 | 0.02348  | 6.90E-05 | 0.009946 | 0.026151 | 0.018927 | 7.87E-04 | 0.010213 | 0.043992 |
| 0.022361 | 0.002453 | 0.00629  | 0.049934 | 0.003306 | 0.041795 | 0        | 0.013059 | 0.059029 | 0.00472  | 0.024975 | 0.028358 | 0.01184  |
| 0.155197 | 1.80E-05 | 0.043463 | 0        | 0.02904  | 0.095873 | 4.68E-04 | 0.001595 | 0.003449 | 0.043363 | 0.003151 | 0.063588 | 0.044638 |
| 0.003527 | 0.002588 | 0.00657  | 4.55E-04 | 0.02053  | 0.00259  | 6.57E-04 | 0.007161 | 0.006505 | 0.004036 | 0.005523 | 0.001227 | 0.002927 |
| 0.001602 | 0.018661 | 0.002354 | 0        | 0.007912 | 0.004193 | 1.44E-04 | 0.005365 | 7.00E-04 | 0.026347 | 0.001152 | 0.043358 | 0.002067 |
| 0.020854 | 0.003193 | 0.012638 | 0.010024 | 0.011619 | 0.007737 | 8.00E-05 | 0.002019 | 0.003224 | 0.026387 | 3.82E-04 | 0.009069 | 0.004232 |
| 0.009843 | 5.91E-04 | 0.001238 | 5.67E-04 | 0.010999 | 0.002383 | 0        | 0.003314 | 9.64E-04 | 0.004742 | 6.90E-04 | 0.014975 | 0.004602 |
| 0.005488 | 0.019488 | 0.001267 | 0.001633 | 4.20E-05 | 0        | 7.40E-05 | 3.50E-04 | 2.55E-04 | 2.50E-05 | 0        | 0        | 0.054507 |
| 1.70E-05 | 0        | 0        | 0        | 0        | 4.20E-05 | 0        | 0        | 0        | 0        | 0        | 0        | 0        |
| 0        | 0        | 0        | 0        | 2.00E-05 | 3.30E-04 | 0        | 0        | 0        | 3.14E-04 | 0        | 9.70E-05 | 0        |
| 0        | 1.90E-05 | 0.006264 | 5.70E-05 | 0.001123 | 0.004533 | 0        | 1.64E-04 | 0.002665 | 0.00322  | 8.65E-04 | 0.155298 | 0.050106 |
| 0        | 0        | 0.003151 | 0        | 0        | 0.001732 | 0        | 3.13E-04 | 3.49E-04 | 0.002053 | 2.45E-04 | 0        | 1.17E-04 |
| 0.004583 | 0.002215 | 0.001416 | 1.61E-04 | 0.00212  | 0.004327 | 9.50E-04 | 0.001705 | 0.001934 | 0.004065 | 0.005258 | 0.005043 | 0.003698 |
| 0.003502 | 0.049738 | 0.004736 | 0.006136 | 0.004292 | 0.003348 | 0        | 0.002029 | 0.001424 | 0.001359 | 0.004312 | 0.007939 | 0.003588 |
| 5.20E-04 | 4.22E-04 | 0.003    | 0.003256 | 1.41E-04 | 0.003318 | 1.57E-04 | 0.011609 | 0.002272 | 0.006952 | 0.002854 | 0.01021  | 0.003246 |
| 2.40E-05 | 1.98E-04 | 6.90E-05 | 9.80E-05 | 0        | 1.76E-04 | 0        | 0        | 0        | 1.60E-05 | 0        | 5.30E-04 | 0.00311  |
| 9.55E-04 | 0.015402 | 0.001446 | 0.001302 | 0.005499 | 0.001619 | 1.43E-04 | 0.003423 | 0.00237  | 0.002529 | 2.13E-04 | 0.001185 | 0.001341 |
| 0.002963 | 0.008991 | 0.002626 | 0        | 8.56E-04 | 0.001387 | 0.001226 | 0.002548 | 0.001589 | 0.002302 | 0.012056 | 7.13E-04 | 0.001877 |
| 3.60E-05 | 0.001714 | 2.65E-04 | 3.70E-04 | 0.001301 | 7.96E-04 | 6.32E-04 | 1.85E-04 | 3.83E-04 | 7.13E-04 | 5.30E-05 | 0.001449 | 0.003739 |
| 0.002701 | 1.50E-05 | 4.78E-04 | 0        | 2.34E-04 | 0.002711 | 0        | 0.003209 | 0.001221 | 0.005378 | 9.55E-04 | 8.30E-04 | 9.43E-04 |
| 6.20E-05 | 2.80E-04 | 0        | 4.20E-05 | 0        | 0        | 0        | 4.20E-05 | 0        | 3.00E-05 | 0        | 8.07E-04 | 1.46E-04 |
| 0.003268 | 1.60E-05 | 8.43E-04 | 0        | 1.10E-05 | 0.002516 | 0        | 3.70E-05 | 0        | 9.21E-04 | 0.001395 | 0        | 0        |
| 0.001587 | 0.009964 | 0.002053 | 5.40E-05 | 0.002466 | 0.00266  | 0        | 0.002661 | 0.002404 | 0.001356 | 0.002197 | 5.25E-04 | 0.001369 |
| 7.57E-04 | 0.009431 | 0.001142 | 4.47E-04 | 3.14E-04 | 9.94E-04 | 2.14E-04 | 0.001515 | 3.71E-04 | 0.002036 | 2.00E-04 | 0.001149 | 0.0015   |
| 0        | 0        | 0        | 0        | 1.60E-05 | 0.003129 | 0        | 3.70E-05 | 0        | 0.004547 | 0        | 0        | 0.002255 |
| 0        | 0        | 0        | 0        | 0        | 0        | 0        | 0        | 0        | 0        | 0        | 0        | 2.70E-05 |
| 6.10E-05 | 0.004953 | 1.41E-04 | 4.22E-04 | 7.10E-05 | 0.003981 | 0        | 6.64E-04 | 2.36E-04 | 0.002096 | 0.013453 | 3.29E-04 | 0.002362 |
| 1.50E-05 | 0.003066 | 1.33E-04 | 2.57E-04 | 1.20E-04 | 1.18E-04 | 8.30E-05 | 1.08E-04 | 0.003752 | 9.54E-04 | 4.50E-05 | 0        | 0.062472 |
| 0.001941 | 1.60E-04 | 3.32E-04 | 0        | 1.34E-04 | 5.67E-04 | 0        | 1.61E-04 | 0        | 0.002479 | 3.86E-04 | 0.013663 | 7.56E-04 |
| 0        | 2.58E-04 | 0        | 5.80E-05 | 0        | 0        | 0        | 0        | 0        | 0        | 0        | 9.30E-05 | 2.71E-04 |
| 1.04E-04 | 3.50E-05 | 1.38E-04 | 0        | 0        | 0        | 7.00E-05 | 0        | 2.50E-04 | 0        | 5.80E-05 | 4.06E-04 | 3.20E-04 |
| 8.40E-05 | 0        | 0.001314 | 0        | 3.90E-05 | 0.00333  | 0        | 0.001348 | 0.001284 | 8.23E-04 | 5.10E-05 | 0.031132 | 0.020957 |
| 2.94E-04 | 7.30E-05 | 0        | 9.70E-05 | 0        | 0.001045 | 0        | 2.43E-04 | 0        | 0.001333 | 0        | 9.90E-04 | 0.002216 |
| 0        | 0.001702 | 0.023675 | 2.06E-04 | 0        | 0.015956 | 0.001018 | 0.002552 | 0.004286 | 0.004962 | 3.42E-04 | 0        | 0.00263  |
| 0        | 7.29E-04 | 0.001586 | 9.80E-05 | 2.30E-05 | 5.69E-04 | 0        | 0        | 1.17E-04 | 1.41E-04 | 2.13E-04 | 8.25E-04 | 0.004252 |
| 7.38E-04 | 0        | 2.77E-04 | 0        | 0.002625 | 0.00309  | 0        | 3.70E-05 | 0        | 0.001096 | 0        | 0.001206 | 0.001807 |
| 0        | 1.57E-04 | 0        | 4.40E-05 | 0        | 0        | 0        | 0        | 0        | 0        | 5.60E-05 | 9.90E-05 | 8.10E-05 |
| 0.001568 | 1.70E-04 | 0.002171 | 0        | 8.48E-04 | 0.001416 | 1.49E-04 | 4.56E-04 | 7.96E-04 | 0.001729 | 0.005293 | 0        | 0.002219 |
| 3.50E-05 | 3.90E-05 | 7.00E-05 | 0        | 0        | 0        | 6.27E-04 | 4.70E-05 | 2.34E-04 | 0        | 0        | 0        | 5.61E-04 |
| 0        | 3.30E-05 | 0.015138 | 5.20E-05 | 0.002777 | 0.007132 | 0        | 0        | 0        | 9.01E-04 | 0        | 7.39E-04 | 6.68E-04 |
| 0        | 1.69E-04 | 6.62E-04 | 5.50E-05 | 0        | 0.001016 | 0        | 1.07E-04 | 5.92E-04 | 9.21E-04 | 0.002939 | 0        | 0.002121 |
| 1.70E-05 | 3.40E-05 | 0        | 5.61E-04 | 3.31E-04 | 0        | 6.60E-05 | 0        | 0        | 8.08E-04 | 2.30E-04 | 0.011064 | 0.006826 |
| 0        | 1.60E-05 | 0        | 1.02E-04 | 0        | 0        | 0        | 0        | 0        | 0        | 0        | 0        | 0        |
| 0        | 6.20E-05 | 0        | 0        | 0        | 0        | 0        | 0        | 0        | 0        | 0        | 0        | 0        |
| 0.002277 | 4.58E-04 | 6.10E-05 | 0        | 5.90E-05 | 0.002063 | 0        | 0        | 0        | 0.007163 | 5.20E-05 | 0.004342 | 0.00529  |
| 0        | 0        | 0        | 0        | 0        | 0        | 0        | 0        | 0        | 0        | 0        | 4.97E-04 | 1.47E-04 |

|          |          |          |          |          |          |          |          |          |          |          |          |          |
|----------|----------|----------|----------|----------|----------|----------|----------|----------|----------|----------|----------|----------|
| 6.40E-05 | 0        | 0        | 0        | 1.70E-05 | 2.00E-04 | 0        | 3.26E-04 | 0.00107  | 0.002303 | 0.001703 | 1.04E-04 | 3.27E-04 |
| 2.30E-05 | 1.50E-05 | 0        | 0        | 0        | 0        | 0        | 0        | 0        | 0        | 0        | 0        | 0        |
| 0        | 1.58E-04 | 0        | 1.02E-04 | 0        | 0        | 8.00E-05 | 0        | 0        | 0        | 0        | 1.09E-04 | 2.25E-04 |
| 0        | 0        | 1.34E-04 | 0        | 0        | 4.00E-05 | 7.90E-05 | 0        | 0        | 0        | 0        | 5.98E-04 | 0.003003 |
| 4.00E-05 | 0        | 0        | 0        | 1.50E-05 | 0        | 7.40E-05 | 0        | 1.18E-04 | 0        | 0        | 0        | 1.44E-04 |
| 0        | 3.90E-05 | 0        | 2.05E-04 | 0        | 0        | 0        | 0        | 0        | 0        | 0        | 0        | 4.10E-05 |
| 0        | 0        | 0        | 0        | 0        | 0        | 0        | 0        | 0        | 0        | 0        | 0        | 0        |
| 7.80E-04 | 0        | 0        | 0        | 0        | 0        | 0        | 5.07E-04 | 0        | 9.14E-04 | 0.001705 | 0        | 7.60E-05 |
| 1.56E-04 | 1.31E-04 | 0.002927 | 0.001014 | 6.00E-05 | 7.56E-04 | 7.50E-05 | 0.001096 | 6.99E-04 | 8.70E-05 | 3.25E-04 | 0        | 2.20E-04 |
| 3.20E-05 | 4.49E-04 | 0.009045 | 1.95E-04 | 1.70E-05 | 6.09E-04 | 0.001955 | 0.003281 | 0.00794  | 2.90E-05 | 3.77E-04 | 0        | 0        |
| 0        | 0        | 0        | 0        | 0        | 0        | 0        | 0        | 0        | 0        | 0        | 0        | 8.10E-05 |
| 0        | 0        | 0        | 4.70E-05 | 0        | 0        | 0.014679 | 0        | 0        | 0        | 0        | 0.001021 | 1.28E-04 |
| 1.05E-04 | 0        | 0        | 0        | 1.01E-04 | 5.10E-05 | 0        | 4.30E-05 | 0        | 6.10E-05 | 1.12E-04 | 0        | 2.73E-04 |
| 2.76E-04 | 0.00259  | 0        | 0        | 0        | 0        | 0        | 0        | 0        | 0        | 0        | 0        | 0.003265 |
| 0        | 0        | 0        | 1.02E-04 | 0        | 0        | 0        | 0        | 0        | 0        | 0        | 0        | 0        |
| 4.36E-04 | 1.60E-05 | 0.005419 | 1.12E-04 | 0        | 8.63E-04 | 0        | 0.00184  | 0.00194  | 0        | 7.68E-04 | 0        | 2.68E-04 |
| 5.87E-04 | 0        | 0        | 0        | 0        | 4.30E-05 | 0.002586 | 0        | 0        | 2.80E-05 | 5.60E-05 | 0.003603 | 0.003159 |
| 0        | 0        | 0        | 0        | 0        | 0        | 0        | 0        | 0        | 0        | 0        | 0        | 7.70E-05 |
| 0        | 0        | 0        | 3.80E-05 | 0        | 0        | 0        | 0        | 0        | 4.00E-05 | 3.73E-04 | 0        | 0        |
| 0        | 0        | 0        | 0        | 0        | 1.35E-04 | 0        | 0        | 0        | 4.60E-05 | 0        | 0        | 0        |
| 0        | 0        | 0        | 0        | 0        | 0        | 0        | 0        | 0        | 0        | 0        | 0        | 0        |
| 0        | 0        | 0        | 0        | 0        | 0        | 0        | 0        | 0        | 0        | 0        | 0        | 0        |
| 0        | 0        | 0        | 0        | 0        | 0        | 0        | 4.00E-05 | 0        | 9.80E-05 | 0        | 0        | 0        |
| 1.40E-04 | 0.001623 | 1.28E-04 | 0        | 0        | 0        | 0        | 3.70E-05 | 0        | 0        | 0        | 0        | 0.004147 |
| 0        | 3.50E-05 | 0        | 0        | 0        | 0        | 0        | 0        | 0        | 0        | 0        | 0        | 1.95E-04 |
| 1.86E-04 | 0.001633 | 0        | 2.13E-04 | 0        | 0        | 0        | 0        | 0        | 0        | 0        | 0        | 0.002071 |
| 3.50E-05 | 1.48E-04 | 0        | 0        | 0        | 0        | 0        | 0        | 0        | 0        | 0        | 0        | 0        |
| 8.40E-05 | 5.10E-05 | 0        | 4.60E-05 | 0        | 0        | 0        | 0        | 0        | 8.20E-05 | 0        | 8.06E-04 | 3.00E-05 |
| 0        | 0        | 0        | 0        | 0        | 0        | 0        | 0        | 0        | 0        | 0        | 0        | 0        |
| 0        | 0        | 0        | 0        | 0        | 0        | 0        | 0        | 0        | 0        | 0        | 0        | 0        |
| 0.008986 | 0.007186 | 0.012571 | 0.005038 | 0.002771 | 0.01144  | 0.004072 | 0.005385 | 0.005192 | 0.00753  | 0.005528 | 0.013767 | 0.023908 |



| CC42     | CC73     | CC36     | CC16     | CC39     | CC52     | CC62     | CC65     | CC55     | CC32     | CC07     | CC63     | CC68     |
|----------|----------|----------|----------|----------|----------|----------|----------|----------|----------|----------|----------|----------|
| 0.034295 | 0.033817 | 0.031369 | 0.027436 | 0.027075 | 0.02557  | 0.025261 | 0.024155 | 0.02291  | 0.01843  | 0.017141 | 0.015771 | 0.014059 |
| 0.005554 | 0.711121 | 0.13721  | 0.301231 | 0.003982 | 0.079531 | 0.579741 | 0.759284 | 0.002176 | 0.790009 | 0.084307 | 0.532785 | 0.365039 |
| 0.109891 | 0.010805 | 0.225342 | 0.378986 | 0.583643 | 0.173175 | 0.024294 | 0.054896 | 0.039923 | 0.008253 | 0.003076 | 0.013093 | 0.365815 |
| 0.395621 | 0.017442 | 0.069217 | 0.017096 | 0.02374  | 0.046841 | 0.052944 | 0.013928 | 0.28501  | 0.019817 | 0.060292 | 0.022008 | 0.066379 |
| 0.007675 | 0.053373 | 0.02632  | 0.032461 | 0.053598 | 0.091876 | 0.151044 | 0.054822 | 1.87E-04 | 0.01184  | 0.599875 | 0.034455 | 0.061025 |
| 3.57E-04 | 0.043373 | 0.059082 | 0.007419 | 0.008524 | 0.017147 | 0.019187 | 0.011259 | 5.14E-04 | 0.037801 | 0.001624 | 0.139224 | 0.008444 |
| 5.75E-04 | 0.001396 | 0.004775 | 5.92E-04 | 1.96E-04 | 6.20E-04 | 9.85E-04 | 0.001714 | 1.91E-04 | 5.68E-04 | 7.30E-05 | 3.11E-04 | 0.001231 |
| 0.381462 | 0.003078 | 0.075518 | 0.002349 | 7.54E-04 | 0.005075 | 0.005053 | 9.73E-04 | 0.087458 | 0.044313 | 0        | 0.020669 | 0.00592  |
| 0.023787 | 0.051714 | 0.0778   | 0.00572  | 0.013419 | 0.045217 | 1.07E-04 | 0.003428 | 1.39E-04 | 4.37E-04 | 1.17E-04 | 0.002654 | 0.018393 |
| 2.39E-04 | 0.004358 | 0.048949 | 0.004543 | 0.00619  | 0.171284 | 0.08797  | 0.005947 | 0.25623  | 0.001118 | 0.203554 | 0.010473 | 0.002965 |
| 0.021027 | 0.004477 | 0.029724 | 0.006277 | 0.024818 | 0.022654 | 0.015527 | 0.007153 | 0.175148 | 0.001938 | 0.015237 | 0.013597 | 0.006435 |
| 7.80E-05 | 0.003504 | 0.026293 | 8.53E-04 | 0.005976 | 0.022159 | 0.002546 | 0.00806  | 4.50E-05 | 0.044075 | 0        | 0.071238 | 0.003295 |
| 2.04E-04 | 0.007192 | 0.053007 | 0.102153 | 0.210469 | 0.057831 | 5.41E-04 | 9.55E-04 | 0        | 5.52E-04 | 3.10E-05 | 0.002688 | 0.004581 |
| 0.001008 | 0.009116 | 8.06E-04 | 0.001893 | 0.003905 | 0.008707 | 0.011195 | 0.005957 | 4.60E-05 | 0.003412 | 0.001336 | 0.032873 | 0.010278 |
| 7.30E-05 | 0.00169  | 0.007021 | 6.30E-05 | 0.001695 | 7.59E-04 | 4.15E-04 | 0.00192  | 0        | 0.001022 | 8.84E-04 | 0.001873 | 0.002192 |
| 8.08E-04 | 0.006472 | 0.017238 | 0.005946 | 3.10E-05 | 0.001591 | 0.001196 | 0.001533 | 0.075448 | 1.50E-04 | 0.001687 | 0.003185 | 0.001699 |
| 0.001364 | 0.005156 | 0.003262 | 0.009846 | 0.005491 | 0.006919 | 3.21E-04 | 2.02E-04 | 0.01097  | 1.47E-04 | 1.55E-04 | 1.10E-04 | 0.001134 |
| 5.57E-04 | 0.003051 | 0.023442 | 0.026706 | 1.77E-04 | 0.044328 | 1.95E-04 | 5.93E-04 | 0.006941 | 1.52E-04 | 0        | 1.06E-04 | 0        |
| 0        | 0        | 0        | 0        | 0        | 0        | 0        | 0        | 0        | 0        | 0        | 6.00E-05 | 0        |
| 0        | 0        | 0.042805 | 1.50E-05 | 0.001029 | 1.65E-04 | 0        | 5.20E-05 | 0        | 0        | 0        | 0        | 0.001313 |
| 2.98E-04 | 0        | 0.004058 | 3.70E-05 | 0        | 0.018086 | 6.50E-04 | 0.008772 | 0.013021 | 8.26E-04 | 0        | 0.004073 | 7.40E-04 |
| 0        | 0        | 1.96E-04 | 0        | 0        | 1.87E-04 | 3.90E-05 | 0.001544 | 0        | 7.00E-05 | 0        | 0.003023 | 5.70E-05 |
| 0        | 0.001012 | 0.001066 | 0.001719 | 0.002459 | 0.006437 | 0.003323 | 0.001181 | 1.70E-05 | 0.001237 | 5.30E-04 | 0.016842 | 0.002129 |
| 0.001297 | 0        | 0.001085 | 0.005375 | 0.001618 | 7.20E-05 | 3.13E-04 | 0.001126 | 4.30E-05 | 0.001248 | 2.83E-04 | 0.006541 | 0.001001 |
| 0.004666 | 8.50E-05 | 1.57E-04 | 0.001648 | 0.001927 | 0.003377 | 4.59E-04 | 0.00293  | 9.16E-04 | 7.69E-04 | 0.001265 | 0.001126 | 0.009171 |
| 0        | 0        | 7.66E-04 | 0.002583 | 6.80E-05 | 0.002366 | 0        | 0        | 0        | 0        | 0        | 0        | 0        |
| 0.002519 | 0.002802 | 0.001416 | 2.12E-04 | 7.82E-04 | 1.27E-04 | 9.11E-04 | 8.41E-04 | 4.32E-04 | 3.54E-04 | 7.30E-05 | 0.003432 | 1.30E-04 |
| 0        | 9.05E-04 | 4.87E-04 | 7.05E-04 | 6.89E-04 | 0.003176 | 4.20E-04 | 1.39E-04 | 0        | 0.002523 | 0.001011 | 0.002549 | 2.84E-04 |
| 1.29E-04 | 1.10E-04 | 2.30E-05 | 0.001002 | 0        | 5.94E-04 | 0        | 4.30E-05 | 0.003563 | 7.00E-05 | 1.17E-04 | 0        | 0        |
| 0        | 1.62E-04 | 0.001435 | 5.69E-04 | 3.46E-04 | 0.001362 | 3.23E-04 | 0.003768 | 2.40E-05 | 2.92E-04 | 2.70E-05 | 1.73E-04 | 0.004012 |
| 0        | 0        | 1.69E-04 | 3.31E-04 | 0        | 0.002606 | 0        | 0        | 0        | 0        | 0        | 0        | 0        |
| 0        | 6.30E-04 | 0        | 1.06E-04 | 0        | 2.60E-04 | 0        | 0.002213 | 0        | 9.45E-04 | 2.69E-04 | 7.30E-05 | 0.009406 |
| 0        | 0.001426 | 4.37E-04 | 1.60E-04 | 2.80E-05 | 6.14E-04 | 0.001366 | 0.001329 | 0        | 3.85E-04 | 4.32E-04 | 0.014493 | 0.001059 |
| 1.48E-04 | 0.001351 | 3.85E-04 | 0.001483 | 5.20E-05 | 3.19E-04 | 2.49E-04 | 1.65E-04 | 1.80E-05 | 8.10E-05 | 1.75E-04 | 1.04E-04 | 1.27E-04 |
| 0        | 0.00371  | 0.002685 | 2.10E-05 | 6.70E-05 | 4.78E-04 | 3.40E-05 | 0        | 0        | 0        | 0        | 0        | 5.03E-04 |
| 0        | 0        | 1.70E-05 | 0        | 0        | 7.80E-05 | 0        | 0        | 0        | 0        | 0        | 0        | 0        |
| 0        | 7.52E-04 | 6.44E-04 | 3.87E-04 | 4.04E-04 | 0.001951 | 1.99E-04 | 8.66E-04 | 0        | 7.60E-05 | 0        | 0.008257 | 0        |
| 6.36E-04 | 1.24E-04 | 6.57E-04 | 0.002102 | 2.11E-04 | 0.001267 | 0        | 4.60E-05 | 0.007951 | 0        | 0        | 4.51E-04 | 0        |
| 0        | 5.00E-05 | 0.001829 | 0.006074 | 0.001836 | 0.013007 | 3.40E-05 | 0        | 0        | 0        | 0        | 4.70E-05 | 1.33E-04 |
| 0        | 0        | 2.49E-04 | 0.001043 | 5.30E-05 | 0.001045 | 0        | 0        | 0        | 0        | 0        | 0        | 0        |
| 0        | 2.20E-05 | 2.60E-05 | 2.02E-04 | 3.82E-04 | 0.002009 | 2.06E-04 | 0        | 0        | 0        | 0        | 5.30E-05 | 5.40E-05 |
| 3.76E-04 | 0.008139 | 6.82E-04 | 0.019398 | 3.26E-04 | 0.004182 | 0.001983 | 0.005027 | 1.84E-04 | 8.67E-04 | 0.002965 | 0.00256  | 3.05E-04 |
| 0        | 0        | 0        | 4.80E-05 | 4.46E-04 | 0.002862 | 0        | 6.77E-04 | 0        | 0        | 0        | 0        | 8.87E-04 |
| 7.00E-05 | 1.63E-04 | 2.27E-04 | 0        | 0        | 1.50E-05 | 0.00296  | 4.24E-04 | 0.001522 | 0        | 6.61E-04 | 2.90E-04 | 0.005942 |
| 0        | 1.60E-04 | 6.26E-04 | 0.003333 | 1.30E-04 | 9.80E-05 | 0        | 0        | 2.30E-05 | 0        | 0        | 5.58E-04 | 6.00E-05 |
| 0        | 0.001027 | 0.002758 | 1.23E-04 | 3.31E-04 | 2.91E-04 | 1.54E-04 | 8.00E-05 | 0        | 0        | 0        | 1.70E-04 | 0        |
| 0        | 0        | 0        | 8.90E-05 | 1.29E-04 | 4.00E-04 | 0        | 0        | 8.70E-05 | 0        | 0        | 0        | 0        |
| 7.80E-05 | 4.19E-04 | 6.94E-04 | 0.001026 | 2.66E-04 | 0.017771 | 2.84E-04 | 0        | 0        | 7.43E-04 | 0        | 0.002822 | 1.16E-04 |
| 0        | 1.07E-04 | 2.12E-04 | 6.46E-04 | 6.31E-04 | 0.001951 | 0        | 0        | 3.00E-05 | 0        | 0        | 4.60E-05 | 0        |
| 0        | 0.002418 | 7.36E-04 | 3.50E-05 | 0        | 0.038302 | 3.00E-05 | 3.55E-04 | 0.001085 | 0        | 0        | 0        | 0        |
| 0        | 0        | 0.001282 | 0        | 7.10E-05 | 1.13E-04 | 2.43E-04 | 0        | 0        | 4.54E-04 | 0        | 3.74E-04 | 0        |
| 0        | 2.10E-05 | 3.47E-04 | 2.23E-04 | 7.81E-04 | 0.002833 | 1.14E-04 | 0        | 0        | 0        | 4.00E-05 | 2.90E-05 | 0        |
| 0        | 0        | 3.80E-05 | 2.94E-04 | 0        | 9.20E-05 | 0        | 0        | 0        | 0        | 0        | 0        | 0        |
| 0        | 0        | 7.20E-05 | 2.46E-04 | 0        | 2.50E-05 | 0        | 0        | 0        | 0        | 0        | 0        | 0        |
| 0        | 0        | 1.18E-04 | 3.10E-05 | 0.001036 | 0.006989 | 0        | 0        | 3.70E-05 | 0        | 0        | 1.38E-04 | 0        |
| 0        | 0        | 1.20E-05 | 1.10E-05 | 0        | 1.81E-04 | 0        | 0        | 2.10E-05 | 0        | 0        | 0        | 0        |

|          |          |          |          |          |          |          |          |          |          |          |          |          |
|----------|----------|----------|----------|----------|----------|----------|----------|----------|----------|----------|----------|----------|
| 0        | 0        | 4.39E-04 | 1.53E-04 | 9.81E-04 | 0.001979 | 5.39E-04 | 0        | 0        | 0        | 0        | 0.008984 | 0        |
| 0        | 0        | 1.50E-05 | 0        | 0        | 5.14E-04 | 0        | 0        | 0        | 0        | 0        | 0        | 0        |
| 0        | 0        | 4.43E-04 | 0.001159 | 0        | 9.15E-04 | 0        | 0        | 0        | 0        | 0        | 0        | 0        |
| 0        | 5.00E-05 | 3.00E-04 | 2.03E-04 | 1.78E-04 | 2.12E-04 | 4.00E-05 | 2.09E-04 | 2.20E-05 | 0        | 0        | 0        | 0        |
| 6.44E-04 | 0        | 0        | 1.83E-04 | 2.20E-05 | 3.18E-04 | 4.00E-05 | 0        | 0        | 0        | 4.40E-05 | 0        | 0        |
| 0        | 0        | 2.35E-04 | 3.37E-04 | 0        | 2.26E-04 | 0        | 0        | 0        | 0        | 0        | 0        | 0        |
| 0        | 0        | 0        | 0        | 0        | 0        | 0        | 0        | 0        | 0        | 0        | 0        | 0        |
| 5.70E-05 | 3.10E-05 | 1.28E-04 | 0        | 0        | 0        | 0        | 0        | 0        | 6.90E-04 | 0        | 7.48E-04 | 2.58E-04 |
| 0.002781 | 9.20E-05 | 1.18E-04 | 0        | 6.40E-05 | 0        | 3.96E-04 | 3.26E-04 | 0.001392 | 7.48E-04 | 1.72E-04 | 2.51E-04 | 0.00172  |
| 7.70E-05 | 0        | 0        | 0        | 0        | 0        | 0.002939 | 3.68E-04 | 0.001345 | 2.41E-04 | 0.001545 | 9.20E-05 | 0.00143  |
| 0        | 0        | 3.20E-05 | 1.11E-04 | 0        | 1.23E-04 | 0        | 0        | 0        | 0        | 0        | 0        | 0        |
| 0        | 0        | 0        | 0.001069 | 1.74E-04 | 1.36E-04 | 0        | 0        | 0        | 0        | 0        | 0        | 0        |
| 0        | 1.40E-05 | 0        | 7.00E-05 | 5.80E-05 | 4.20E-05 | 5.48E-04 | 0.002153 | 0        | 0        | 0        | 2.29E-04 | 6.40E-05 |
| 0        | 1.46E-04 | 0.001663 | 0.001392 | 1.84E-04 | 0.002453 | 0        | 1.80E-05 | 9.65E-04 | 0        | 0        | 0        | 0        |
| 0        | 0        | 0        | 0        | 0        | 2.10E-05 | 0        | 0        | 0        | 0        | 0        | 0        | 0        |
| 1.40E-04 | 9.20E-05 | 1.19E-04 | 5.40E-05 | 0        | 0        | 1.78E-04 | 0.005578 | 6.10E-05 | 0.001397 | 0        | 6.33E-04 | 0.009864 |
| 0        | 0        | 1.80E-05 | 0.002153 | 0.002026 | 7.55E-04 | 0        | 0        | 0        | 7.30E-05 | 3.92E-04 | 0        | 0        |
| 0        | 0        | 0        | 0        | 3.50E-05 | 5.60E-05 | 0        | 0        | 0        | 0        | 0        | 0        | 0        |
| 0        | 0        | 0        | 6.60E-05 | 0        | 6.20E-05 | 0        | 0        | 0        | 0        | 0        | 0        | 0        |
| 0        | 0        | 0        | 0        | 0        | 0        | 0        | 5.70E-05 | 0        | 0        | 0        | 0        | 0        |
| 0        | 0        | 0        | 0        | 0        | 0        | 0        | 0        | 0        | 0        | 0        | 0        | 0        |
| 0        | 0        | 0        | 0        | 0        | 0        | 0        | 0        | 0        | 0        | 0        | 0        | 0        |
| 0        | 0        | 0        | 0        | 0        | 0        | 0        | 0        | 0        | 0        | 0        | 0        | 0        |
| 0        | 4.05E-04 | 0.001355 | 0.001015 | 2.59E-04 | 0.002036 | 0        | 0        | 6.37E-04 | 0        | 0        | 6.50E-05 | 5.80E-05 |
| 0        | 0        | 1.40E-05 | 1.14E-04 | 0        | 2.10E-05 | 0        | 0        | 0        | 0        | 0        | 0        | 0        |
| 6.30E-05 | 1.15E-04 | 9.58E-04 | 8.10E-04 | 5.70E-05 | 0.001951 | 3.30E-05 | 7.10E-05 | 6.90E-04 | 0        | 0        | 2.10E-05 | 0        |
| 0        | 0        | 1.60E-05 | 2.70E-05 | 0        | 7.60E-05 | 0        | 0        | 4.60E-05 | 0        | 0        | 0        | 0        |
| 0        | 0        | 1.50E-05 | 9.00E-04 | 0        | 0.009272 | 0        | 0        | 0        | 7.80E-05 | 0        | 0        | 1.37E-04 |
| 0        | 0        | 0        | 0        | 0        | 0        | 0        | 0        | 0        | 0        | 0        | 0        | 0        |
| 0        | 0        | 0        | 0        | 0        | 0        | 0        | 0        | 0        | 0        | 0        | 0        | 0        |
| 0.001446 | 0.002325 | 0.009361 | 0.007337 | 0.006181 | 0.02186  | 0.002471 | 0.002863 | 0.002532 | 0.001799 | 6.10E-04 | 0.00358  | 0.010156 |

| CC58     | CC21     | CC11     | CC28     | CC26     | CC43     | CC51     | CC03     | CC64     | CC12     | ID...75                         | SC29     | SC01     |
|----------|----------|----------|----------|----------|----------|----------|----------|----------|----------|---------------------------------|----------|----------|
| 0.013332 | 0.012501 | 0.012492 | 0.011237 | 0.010957 | 0.006553 | 0.004665 | 0.002963 | 0.002028 | 1.72E-04 | Prevotella                      | 0.636665 | 0.561803 |
| 0.196766 | 0.162214 | 8.60E-05 | 0.11793  | 0.003727 | 0.189964 | 0.044193 | 0.508    | 0.001587 | 0.036779 | Neisseria                       | 6.79E-04 | 0.048741 |
| 0.354804 | 0.226127 | 0.297854 | 0.368676 | 0.667097 | 0.172731 | 0.223875 | 0.180623 | 0.965499 | 0.71271  | Streptococcus                   | 0.001505 | 0.046059 |
| 0.026582 | 0.009135 | 0.174054 | 0.019287 | 0.081817 | 0.30003  | 0.018957 | 0.015638 | 0.002343 | 3.88E-04 | Veillonella                     | 0.04681  | 0.104149 |
| 0.224234 | 0.053143 | 0.039727 | 0.0569   | 0.059084 | 3.23E-04 | 0.041432 | 0.010673 | 8.27E-04 | 0.140442 | Leptotrichium                   | 0.132002 | 0.039503 |
| 0.00323  | 0.048487 | 1.51E-04 | 0.005565 | 0.003587 | 6.63E-04 | 0.008091 | 0.00801  | 5.97E-04 | 5.00E-05 | Fusobacterium                   | 0.001315 | 0.015264 |
| 4.17E-04 | 0.001661 | 2.20E-04 | 6.20E-05 | 5.54E-04 | 1.36E-04 | 1.54E-04 | 1.40E-05 | 6.74E-04 | 4.30E-05 | Alloprevotella                  | 3.91E-04 | 0.003585 |
| 0.017635 | 0.080289 | 0.003154 | 0.013865 | 1.40E-04 | 0.00394  | 0.001084 | 0.010896 | 8.83E-04 | 1.00E-04 | Porphyromonas                   | 2.53E-04 | 0.007024 |
| 0.002867 | 0.070842 | 1.54E-04 | 0.003016 | 0.018276 | 1.99E-04 | 0.025456 | 0.100207 | 0.002008 | 0.063255 | Haemophilus                     | 2.50E-05 | 2.90E-05 |
| 0.013109 | 0.004731 | 0.043466 | 0.006425 | 0.007338 | 0.004313 | 0.013766 | 0.00432  | 0.001166 | 0.003466 | Actinomyces                     | 0.019523 | 0.025914 |
| 0.028966 | 0.010554 | 0.363835 | 0.241687 | 0.001762 | 0.001203 | 0.043269 | 0.021006 | 3.00E-04 | 0.022608 | Rothia                          | 2.49E-04 | 0.014207 |
| 0.020034 | 0.015884 | 0.01709  | 0.012629 | 1.17E-04 | 0.006544 | 0.003318 | 0.006524 | 1.36E-04 | 2.70E-05 | Capnocytophaga                  | 0.002242 | 0.00705  |
| 0.013783 | 0.062756 | 2.20E-05 | 0.062085 | 0.063669 | 1.70E-05 | 0.466673 | 0.046322 | 0.009627 | 0        | Gemella                         | 4.17E-04 | 0.00271  |
| 0.001903 | 0.004046 | 6.60E-05 | 0.001881 | 0.002757 | 4.30E-05 | 0.001175 | 3.51E-04 | 2.65E-04 | 3.20E-05 | Lachnoanaerobaculum             | 0.072284 | 0.008444 |
| 0.001398 | 0.001354 | 0        | 0.003671 | 2.30E-04 | 8.00E-06 | 1.25E-04 | 1.91E-04 | 1.00E-04 | 1.13E-04 | TM7x                            | 0.029504 | 0.047462 |
| 0.003836 | 0.015093 | 0.014161 | 0.007699 | 0.008487 | 0.020363 | 0.02599  | 0.004384 | 2.61E-04 | 0        | Granulicatella                  | 0        | 0.006942 |
| 6.62E-04 | 7.23E-04 | 1.05E-04 | 3.34E-04 | 9.75E-04 | 8.10E-04 | 7.94E-04 | 0.007067 | 6.90E-05 | 0        | Campylobacter                   | 0.00175  | 7.30E-05 |
| 6.67E-04 | 0.071288 | 7.78E-04 | 0.00124  | 4.30E-04 | 0.044805 | 0.008183 | 0.0332   | 2.60E-05 | 2.49E-04 | Halomonas                       | 1.09E-04 | 5.29E-04 |
| 0        | 0        | 0        | 0        | 0        | 0        | 0        | 0        | 0        | 0        | Moraxella                       | 0        | 0        |
| 0        | 0.016553 | 0        | 5.90E-05 | 0        | 0        | 0.001862 | 0        | 1.90E-05 | 0        | Actinobacillus                  | 0        | 0        |
| 0.025152 | 0.022576 | 0        | 0.001709 | 4.70E-05 | 0.123433 | 0        | 0        | 5.20E-05 | 0.012367 | Lautropia                       | 5.80E-05 | 0        |
| 0        | 5.78E-04 | 0        | 0.000649 | 7.80E-05 | 0        | 0        | 0        | 2.00E-05 | 0        | g_Absconditibacterium           | 0        | 0        |
| 0.001096 | 0.005187 | 8.80E-05 | 0.00457  | 0.001088 | 0        | 0.00112  | 1.21E-04 | 8.60E-05 | 0        | Ornithobacterium                | 0.015178 | 0.002645 |
| 1.13E-04 | 0.00324  | 5.65E-04 | 0.007618 | 2.70E-05 | 2.10E-05 | 8.84E-04 | 9.23E-04 | 4.10E-05 | 6.90E-05 | Peptostreptococcus              | 0.005589 | 0.006084 |
| 3.64E-04 | 1.91E-04 | 6.77E-04 | 3.90E-04 | 2.41E-04 | 8.10E-05 | 0.001685 | 4.22E-04 | 5.50E-05 | 0        | Selenomonas                     | 0.006932 | 3.54E-04 |
| 0        | 9.30E-05 | 3.80E-05 | 0        | 0        | 0.001497 | 7.30E-05 | 2.36E-04 | 0        | 2.10E-05 | Bacteroides                     | 3.50E-04 | 0        |
| 1.51E-04 | 0.001387 | 3.90E-05 | 2.96E-04 | 5.75E-04 | 3.10E-05 | 2.15E-04 | 3.00E-05 | 1.72E-04 | 2.80E-05 | Solobacterium                   | 0.003437 | 0.005956 |
| 2.97E-04 | 6.03E-04 | 0        | 0.012976 | 0.001985 | 5.00E-06 | 1.31E-04 | 9.60E-05 | 1.25E-04 | 0        | Stomatobaculum                  | 0        | 5.87E-04 |
| 1.40E-04 | 0        | 0        | 0        | 1.65E-04 | 2.92E-04 | 0        | 8.00E-05 | 1.10E-05 | 0        | Megasphaera                     | 7.70E-05 | 0.002939 |
| 6.99E-04 | 5.48E-04 | 0        | 0.001102 | 1.06E-04 | 2.80E-05 | 1.30E-05 | 6.82E-04 | 1.77E-04 | 0        | Clostridia_L1CG_014_Pseudomonas | 0.004765 | 0.003653 |
| 0        | 1.21E-04 | 6.70E-05 | 0        | 0        | 8.97E-04 | 6.70E-05 | 0.001337 | 0        | 2.43E-04 | Pseudomonas                     | 1.90E-05 | 0        |
| 0.00118  | 6.40E-05 | 0        | 0        | 0        | 0        | 1.42E-04 | 1.23E-04 | 0        | 0        | Lachnospiraceae uncl            | 0        | 0        |
| 7.31E-04 | 4.17E-04 | 3.63E-04 | 0.001033 | 4.99E-04 | 0        | 3.39E-04 | 0        | 1.65E-04 | 0        | [Eubacterium] nodatum           | 0.006111 | 0.015681 |
| 6.75E-04 | 2.33E-04 | 3.80E-05 | 0        | 7.00E-05 | 5.60E-05 | 7.10E-05 | 1.23E-04 | 2.30E-05 | 0        | Atopobium                       | 7.95E-04 | 0.003357 |
| 0.002426 | 0.005695 | 0        | 1.26E-04 | 1.59E-04 | 0        | 0        | 3.00E-04 | 4.90E-05 | 0        | Aggregatibacter                 | 0        | 0        |
| 0        | 0        | 0        | 0        | 0        | 0        | 0        | 0        | 0        | 0        | Mirribaculaceae                 | 0        | 0        |
| 0.002458 | 0.001459 | 1.50E-04 | 5.10E-05 | 0        | 5.50E-05 | 3.47E-04 | 6.70E-05 | 5.90E-05 | 3.90E-05 | Tannerella                      | 0.002198 | 0.007475 |
| 0.003513 | 0.003806 | 0        | 4.25E-04 | 3.90E-05 | 0        | 5.70E-05 | 0        | 4.00E-05 | 0        | Corynebacterium                 | 0        | 0        |
| 0        | 8.00E-05 | 0        | 3.61E-04 | 7.46E-04 | 1.50E-05 | 0.002228 | 0.003218 | 4.00E-05 | 0        | Treponema                       | 0        | 0        |
| 0        | 1.70E-05 | 3.10E-05 | 0        | 0        | 6.08E-04 | 6.90E-05 | 2.30E-04 | 0        | 0        | Faecalibacterium                | 6.80E-05 | 0        |
| 0        | 1.56E-04 | 0        | 0        | 2.92E-04 | 1.50E-05 | 7.80E-05 | 1.39E-04 | 0        | 0        | Lachnospiraceae uncl            | 0.003949 | 5.02E-04 |
| 0.00183  | 0.002258 | 0        | 0.001036 | 9.30E-05 | 0.010504 | 0.001733 | 0.003372 | 0        | 0        | Neisseriaceae unclassi          | 0        | 0        |
| 2.26E-04 | 0        | 0        | 0        | 2.70E-05 | 0        | 1.90E-05 | 0        | 0        | 0        | Saccharimonadales               | 0        | 0        |
| 0.003952 | 0.019554 | 0.001544 | 0.002819 | 0.00207  | 0        | 1.28E-04 | 0        | 0.006049 | 1.01E-04 | Lactobacillus unclas            | 2.80E-05 | 0.001045 |
| 0        | 0        | 0        | 7.00E-05 | 0        | 9.00E-06 | 6.25E-04 | 0        | 2.50E-05 | 2.40E-05 | Parvimonas                      | 0        | 3.10E-05 |
| 5.22E-04 | 0.002881 | 9.60E-05 | 6.80E-05 | 3.40E-05 | 0        | 0.001401 | 9.24E-04 | 1.30E-05 | 0        | Bergeyella                      | 5.10E-05 | 0        |
| 0        | 4.66E-04 | 0        | 0        | 0        | 3.34E-04 | 2.00E-05 | 2.35E-04 | 0        | 0        | Rhodococcus                     | 0        | 0        |
| 5.10E-05 | 2.43E-04 | 0        | 2.91E-04 | 0        | 0        | 4.40E-05 | 1.39E-04 | 0        | 0        | Johnsonella                     | 0        | 0        |
| 3.07E-04 | 0.002956 | 0        | 7.29E-04 | 0.043009 | 0        | 0.040803 | 0.002927 | 0        | 1.51E-04 | F0332                           | 0        | 0        |
| 4.84E-04 | 0.04096  | 0.007064 | 2.62E-04 | 0        | 0.053043 | 0.002491 | 0        | 1.97E-04 | 0        | Abiotrophia                     | 0        | 0        |
| 1.17E-04 | 0        | 0        | 0.001203 | 4.00E-05 | 0        | 0        | 0        | 4.90E-05 | 0        | Filifactor                      | 0        | 7.90E-05 |
| 0        | 0        | 3.80E-05 | 2.43E-04 | 0        | 6.00E-05 | 2.50E-05 | 1.69E-04 | 0        | 2.60E-05 | Dialister                       | 0        | 3.80E-05 |
| 0        | 0        | 0        | 0        | 0        | 3.50E-05 | 0        | 0        | 0        | 0        | Lachnospiraceae NK4             | 0        | 0        |
| 0        | 0        | 0        | 0        | 0        | 1.20E-05 | 0        | 0        | 0        | 0        | Fusicatembacter                 | 0        | 0        |
| 0.008292 | 2.40E-05 | 0        | 5.30E-05 | 0        | 1.70E-05 | 0        | 0        | 2.01E-04 | 0        | Saccharimonadaeae               | 2.60E-05 | 1.21E-04 |
| 0        | 9.80E-05 | 0        | 0        | 0        | 1.65E-04 | 0        | 1.04E-04 | 0        | 1.90E-05 | Acinetobacter                   | 0        | 0        |

|          |          |          |          |          |          |          |          |          |          |                               |          |          |
|----------|----------|----------|----------|----------|----------|----------|----------|----------|----------|-------------------------------|----------|----------|
| 0        | 1.52E-04 | 0        | 0        | 0        | 0        | 4.59E-04 | 1.70E-05 | 0        | 3.30E-05 | F0058                         | 0        | 1.30E-04 |
| 0        | 1.85E-04 | 3.50E-05 | 0        | 0        | 3.11E-04 | 0        | 2.40E-05 | 0        | 0        | Sphingomonas                  | 0        | 0        |
| 0        | 5.10E-05 | 0        | 0        | 3.20E-05 | 4.48E-04 | 5.30E-05 | 5.20E-05 | 0        | 1.31E-04 | Bifidobacterium               | 0        | 4.50E-05 |
| 0        | 4.88E-04 | 0        | 6.70E-05 | 3.80E-05 | 0.02683  | 5.00E-05 | 4.40E-05 | 1.20E-05 | 0        | Kingella                      | 2.50E-05 | 0        |
| 0        | 0        | 1.63E-04 | 0        | 1.18E-04 | 2.90E-05 | 0        | 1.66E-04 | 3.20E-05 | 7.35E-04 | Lactobacillus                 | 0        | 0        |
| 0        | 1.03E-04 | 0        | 0        | 0        | 1.67E-04 | 3.80E-05 | 9.10E-05 | 0        | 0        | Roseburia                     | 2.60E-05 | 2.50E-05 |
| 0        | 0        | 0        | 9.80E-05 | 0        | 0        | 0        | 0        | 0        | 0        | Leptotrichaceae unclassified  | 0        | 0        |
| 0        | 0        | 0        | 0        | 1.08E-04 | 0        | 6.80E-05 | 0        | 1.20E-05 | 0        | Amnipylo                      | 0        | 0        |
| 0.002499 | 0        | 0.010514 | 0.012878 | 7.08E-04 | 0        | 7.10E-05 | 0        | 3.41E-04 | 6.26E-04 | Bacteria unclassified         | 0        | 7.01E-04 |
| 0.001341 | 0        | 5.38E-04 | 0.001608 | 0.002061 | 1.00E-05 | 0        | 0        | 0.001202 | 1.19E-04 | Actinobacteria unclassified   | 0        | 6.03E-04 |
| 0        | 0        | 0        | 0        | 0        | 6.80E-05 | 0        | 0        | 0        | 0        | Megamonas                     | 0        | 0        |
| 0        | 0        | 0        | 0        | 0        | 1.25E-04 | 0        | 0        | 0        | 0        | Scardovia                     | 7.80E-05 | 0        |
| 0        | 0        | 0        | 0        | 0        | 0        | 1.67E-04 | 1.02E-04 | 0        | 0        | Butyrivibrio                  | 2.30E-05 | 0        |
| 0        | 0.004395 | 4.10E-05 | 5.80E-05 | 0        | 0.002137 | 6.36E-04 | 0.002294 | 0        | 4.90E-05 | Pelagibacterium               | 0        | 4.60E-05 |
| 0        | 0        | 0        | 0        | 0        | 0        | 0        | 0        | 0        | 0        | [Eubacterium] rumina          | 0        | 0        |
| 0.010326 | 0        | 0        | 0.002729 | 4.89E-04 | 0        | 2.70E-05 | 1.40E-05 | 0.001254 | 3.66E-04 | Burkholderiales unclassified  | 0        | 6.00E-05 |
| 0        | 0        | 3.40E-05 | 0        | 0.001178 | 0        | 0.001022 | 6.40E-05 | 0        | 0        | Shuttleworthia                | 5.50E-05 | 0        |
| 0        | 0        | 0        | 0        | 0        | 0        | 0        | 5.00E-05 | 0        | 0        | Selenomonadaceae unclassified | 0        | 0        |
| 0        | 0        | 0        | 0        | 0        | 7.50E-05 | 0        | 0        | 0        | 0        | Christensenellaceae R         | 0        | 0        |
| 0        | 3.79E-04 | 0        | 0        | 0        | 0        | 0        | 0        | 0        | 0        | Gracilbacteria                | 0        | 0        |
| 0        | 0        | 0        | 0        | 0        | 0        | 0        | 0        | 0        | 0        | Heliobacterium                | 0        | 0        |
| 0        | 0        | 0        | 0        | 0        | 0        | 0        | 0        | 0        | 0        | Prevotellaceae NK3B           | 0        | 0        |
| 0        | 0        | 0        | 0        | 0        | 0        | 0        | 0        | 0        | 0        | Acholeplasma                  | 0        | 0        |
| 4.30E-05 | 0.003144 | 0        | 6.10E-05 | 3.90E-05 | 0.002111 | 4.40E-04 | 0.001659 | 0        | 0        | Xanthomonadaceae unclassified | 5.10E-05 | 0        |
| 0        | 0        | 0        | 0        | 0        | 5.30E-05 | 0        | 8.60E-05 | 0        | 0        | Phascolarctobacterium         | 0        | 0        |
| 4.80E-05 | 0.001982 | 4.70E-05 | 0        | 4.10E-05 | 0.001569 | 4.63E-04 | 0.001239 | 1.90E-05 | 0        | Rhizobiaceae unclassified     | 0        | 0        |
| 0        | 8.50E-05 | 0        | 0        | 0        | 1.62E-04 | 2.10E-05 | 1.78E-04 | 0        | 0        | Serratia                      | 0        | 0        |
| 0        | 1.11E-04 | 6.60E-04 | 5.90E-05 | 0        | 6.05E-04 | 3.31E-04 | 0.011878 | 0        | 0.001639 | Chloroplast                   | 4.90E-05 | 0        |
| 0        | 0        | 0        | 0        | 0        | 0        | 0        | 0        | 0        | 0        | Mucispirillum                 | 0        | 0        |
| 5.21E-04 | 0        | 0        | 0        | 0        | 0        | 0        | 0        | 0        | 0        | Propionibacterium             | 0        | 0        |
| 0.006221 | 0.005653 | 0.009755 | 0.010114 | 0.012794 | 0.021442 | 0.008284 | 0.005656 | 0.001064 | 0.00278  | Others                        | 0.004339 | 0.008355 |

| SC27     | SC22     | SC26     | SC28     | SC03     | SC04     | SC17     | SC25     | SC23     | SC09     | SC08     | SC07     | SC20     |
|----------|----------|----------|----------|----------|----------|----------|----------|----------|----------|----------|----------|----------|
| 0.52656  | 0.491189 | 0.453739 | 0.428353 | 0.375188 | 0.3624   | 0.262834 | 0.255013 | 0.239628 | 0.234224 | 0.190914 | 0.190025 | 0.149065 |
| 0.031555 | 0.018676 | 0.04892  | 0.018378 | 0.122298 | 0.111978 | 0.013247 | 0.037949 | 0.045824 | 0.164496 | 0.035944 | 0.199306 | 0.191421 |
| 0.012284 | 0.026308 | 0.078229 | 0.071241 | 0.084145 | 0.071231 | 0.112444 | 0.050638 | 0.14453  | 0.102306 | 0.081513 | 0.01473  | 0.081298 |
| 0.038775 | 0.077474 | 0.10633  | 0.059168 | 0.110395 | 0.120292 | 0.021646 | 0.026666 | 0.039168 | 0.105311 | 0.097827 | 0.041131 | 0.040006 |
| 0.036634 | 0.210686 | 0.169548 | 0.018846 | 0.025023 | 0.089963 | 0.237995 | 0.158849 | 0.147541 | 0.110002 | 0.038767 | 0.248728 | 0.225839 |
| 9.90E-05 | 0.01829  | 0.029475 | 0.017013 | 0.033169 | 0.0182   | 0.028368 | 0.054647 | 0.019166 | 0.002948 | 0.07646  | 0.074532 | 0.016237 |
| 0.043168 | 0.003478 | 4.41E-04 | 0.021413 | 0.0022   | 0.006141 | 0.006161 | 0.005736 | 0.006304 | 0.032616 | 0.00157  | 0.001615 | 0.008306 |
| 0.007667 | 0.008823 | 0.005638 | 0.047552 | 0.048374 | 1.75E-04 | 0.038663 | 0.017791 | 0.037299 | 0.042462 | 0.075622 | 0.010368 | 0.011826 |
| 0.018649 | 0.014213 | 0.015076 | 0.012564 | 0.031042 | 0.016509 | 0.003322 | 0.011429 | 0.047336 | 0.018925 | 0.035728 | 0.052416 | 0.050965 |
| 0.012043 | 0.035751 | 0.00639  | 0.046375 | 0.014181 | 0.030869 | 0.046456 | 0.024648 | 0.003518 | 0.030119 | 0.031121 | 2.82E-04 | 0.006669 |
| 0.005738 | 0.018038 | 0.00138  | 0.001039 | 0.052309 | 0.02731  | 0.002818 | 0.006035 | 0.001514 | 0.013273 | 0.105786 | 0.030823 | 0.005399 |
| 0.010794 | 0.002112 | 0.004605 | 0.027989 | 0.003696 | 0.001177 | 0.004308 | 0.025966 | 0.161246 | 0.003082 | 0.022154 | 0.046262 | 0.02726  |
| 0.031531 | 0.010583 | 0.02567  | 0.018348 | 0.005728 | 0.003998 | 0.00605  | 0.016581 | 0.016391 | 0.004969 | 0.031111 | 0.014361 | 0.083214 |
| 0.022721 | 0.011878 | 0.006523 | 0.053813 | 0.007222 | 0.019232 | 0.005914 | 0.010181 | 0.002693 | 0.002283 | 0.004025 | 0.021236 | 0.007527 |
| 0.008586 | 0.017552 | 8.65E-04 | 0.01533  | 0.002979 | 0.015988 | 0.032336 | 0.022267 | 1.79E-04 | 0.005933 | 0.00572  | 1.31E-04 | 0.001361 |
| 0.001949 | 0.003312 | 0.007833 | 0.028352 | 0.004688 | 0.018028 | 0.003837 | 9.07E-04 | 3.84E-04 | 0.011    | 0.021129 | 0.011875 | 0.003405 |
| 0.006403 | 8.85E-04 | 0.00513  | 0.004535 | 0.002736 | 0.008079 | 0.005463 | 0.025503 | 0.008072 | 0.003442 | 6.14E-04 | 9.48E-04 | 0.005347 |
| 4.01E-04 | 0.001431 | 6.21E-04 | 6.20E-05 | 3.70E-04 | 5.50E-04 | 4.90E-05 | 0.031475 | 0        | 0.02609  | 0.018897 | 0.002659 | 5.37E-04 |
| 0        | 0        | 0        | 0        | 0        | 0        | 0        | 0        | 0        | 0        | 0        | 0        | 0        |
| 0        | 3.60E-05 | 0        | 0        | 0.002437 | 0        | 6.10E-05 | 0        | 0        | 0        | 0        | 0        | 0        |
| 0        | 6.50E-05 | 1.55E-04 | 0        | 4.17E-04 | 5.10E-05 | 9.80E-04 | 1.07E-04 | 7.00E-05 | 6.48E-04 | 0.016977 | 0        | 0.001019 |
| 8.63E-04 | 2.90E-05 | 0        | 0        | 2.17E-04 | 3.00E-05 | 0.004554 | 0.003138 | 1.23E-04 | 0.002444 | 0.003023 | 7.80E-05 | 0.004102 |
| 0.032253 | 0.00116  | 7.19E-04 | 0.011417 | 0.004882 | 0.002737 | 0.001963 | 0.003867 | 0.004832 | 0.005301 | 0.002191 | 9.36E-04 | 0.003251 |
| 0.005869 | 0.003929 | 0        | 1.38E-04 | 0.006455 | 0.003182 | 0.002032 | 0.001714 | 0.035004 | 0.004137 | 0.019352 | 0.012766 | 0.006842 |
| 0.004998 | 0.001579 | 0.004756 | 0.001539 | 0.003814 | 0.004983 | 0.034123 | 0.011493 | 2.82E-04 | 0.010542 | 0.001613 | 1.17E-04 | 0.004365 |
| 3.20E-05 | 0        | 0        | 9.50E-05 | 3.10E-05 | 0        | 2.00E-05 | 9.50E-05 | 6.80E-05 | 3.40E-05 | 3.14E-04 | 7.40E-05 | 0        |
| 0.020136 | 0.006318 | 0.011421 | 0.035347 | 0.002513 | 0.006214 | 0.002697 | 0.004488 | 0.011282 | 0.005826 | 0.01956  | 0.006038 | 0.003279 |
| 0.006099 | 1.41E-04 | 0.001641 | 0.002865 | 0.009558 | 0.005255 | 0.001077 | 0.007408 | 0.001313 | 0.001587 | 4.80E-05 | 0        | 0.003739 |
| 0.00446  | 5.68E-04 | 1.98E-04 | 3.71E-04 | 8.96E-04 | 0.012732 | 0.001669 | 0.001375 | 0        | 0.002655 | 0.012851 | 0        | 0.00144  |
| 0.005506 | 3.31E-04 | 1.55E-04 | 0.001041 | 0.002267 | 5.30E-04 | 0.022791 | 0.026912 | 7.90E-05 | 0.001965 | 9.15E-04 | 0        | 0.011551 |
| 0        | 0        | 0        | 0        | 0        | 0        | 0        | 1.51E-04 | 0        | 7.00E-05 | 2.90E-05 | 0        | 0        |
| 0.005805 | 0        | 9.72E-04 | 0        | 0.00238  | 0.004439 | 0.002002 | 0.014145 | 0        | 0.010608 | 0        | 3.70E-05 | 0.002943 |
| 0.04854  | 0.007036 | 0.002477 | 0.026112 | 0.01625  | 0.016496 | 0.006044 | 3.35E-04 | 0.012795 | 0.011909 | 0.003214 | 0.001629 | 0.003593 |
| 0.004663 | 0.001302 | 0.001012 | 0.004605 | 7.30E-04 | 0.008718 | 0.00507  | 0.013197 | 4.52E-04 | 0.004867 | 0.008272 | 0        | 6.68E-04 |
| 0        | 1.90E-04 | 8.70E-05 | 5.40E-04 | 0.001807 | 0        | 3.15E-04 | 0.001503 | 7.75E-04 | 3.01E-04 | 0.007821 | 5.49E-04 | 0.001128 |
| 0        | 0        | 0        | 0        | 0        | 0        | 0        | 0        | 0        | 0        | 0        | 0        | 0        |
| 9.80E-05 | 0.001016 | 2.21E-04 | 1.70E-04 | 0.001102 | 2.51E-04 | 0.024408 | 0.011306 | 5.65E-04 | 4.22E-04 | 3.69E-04 | 3.60E-05 | 0.002372 |
| 0.003041 | 0        | 0        | 0        | 5.90E-04 | 1.29E-04 | 5.60E-05 | 4.38E-04 | 0        | 1.33E-04 | 0.003678 | 0        | 5.43E-04 |
| 0.008868 | 0        | 7.25E-04 | 6.51E-04 | 2.64E-04 | 1.71E-04 | 5.28E-04 | 0.039406 | 6.08E-04 | 6.16E-04 | 1.20E-04 | 1.17E-04 | 0.002172 |
| 0        | 0        | 0        | 2.80E-05 | 0        | 0        | 0        | 2.30E-05 | 0        | 0        | 0        | 4.20E-05 | 0        |
| 1.39E-04 | 2.28E-04 | 1.88E-04 | 0.001935 | 6.40E-05 | 1.87E-04 | 1.70E-05 | 9.00E-05 | 1.13E-04 | 0        | 1.39E-04 | 3.05E-04 | 4.40E-05 |
| 8.07E-04 | 6.97E-04 | 6.25E-04 | 3.40E-05 | 0.001098 | 4.37E-04 | 2.74E-04 | 3.82E-04 | 6.63E-04 | 5.13E-04 | 3.95E-04 | 0.005965 | 0.001427 |
| 5.80E-05 | 3.80E-05 | 1.65E-04 | 8.00E-05 | 0        | 7.30E-05 | 0.002673 | 0.001152 | 4.10E-05 | 2.35E-04 | 5.16E-04 | 0        | 8.00E-05 |
| 0        | 2.47E-04 | 1.44E-04 | 0.001978 | 8.44E-04 | 5.39E-04 | 0.003636 | 9.60E-05 | 2.01E-04 | 7.31E-04 | 0.003225 | 0        | 0.003062 |
| 0        | 1.43E-04 | 0        | 1.99E-04 | 0.001175 | 1.65E-04 | 3.64E-04 | 0.001324 | 1.23E-04 | 3.75E-04 | 5.47E-04 | 0        | 0.004019 |
| 2.15E-04 | 7.50E-04 | 6.56E-04 | 6.27E-04 | 1.86E-04 | 0        | 2.44E-04 | 1.17E-04 | 4.29E-04 | 0.006219 | 0.002339 | 0.003842 | 0.002048 |
| 0        | 0        | 0        | 0        | 0        | 0        | 0        | 1.27E-04 | 0        | 6.90E-05 | 2.80E-05 | 1.18E-04 | 0        |
| 3.16E-04 | 3.37E-04 | 2.90E-04 | 0.002297 | 2.79E-04 | 1.34E-04 | 6.00E-05 | 0.001727 | 4.00E-05 | 0        | 5.70E-05 | 0        | 0.004742 |
| 0        | 0        | 9.37E-04 | 0        | 7.50E-05 | 2.39E-04 | 6.69E-04 | 0        | 4.40E-05 | 1.43E-04 | 0        | 1.31E-04 | 2.43E-04 |
| 0        | 0        | 0        | 0.002406 | 8.61E-04 | 6.30E-05 | 2.15E-04 | 0        | 0        | 1.95E-04 | 8.64E-04 | 0.002696 | 1.18E-04 |
| 0        | 3.80E-05 | 5.80E-05 | 0.002668 | 7.76E-04 | 1.97E-04 | 5.35E-04 | 0.003277 | 0        | 2.99E-04 | 8.88E-04 | 0        | 6.57E-04 |
| 1.53E-04 | 6.20E-05 | 2.55E-04 | 1.03E-04 | 3.87E-04 | 3.24E-04 | 0.014065 | 0.009667 | 0        | 8.30E-05 | 0.002458 | 0        | 1.69E-04 |
| 0        | 0        | 0        | 0        | 0        | 0        | 0        | 0        | 0        | 0        | 0        | 0        | 0        |
| 0        | 0        | 0        | 0        | 0        | 0        | 0        | 0        | 0        | 0        | 0        | 0        | 0        |
| 1.31E-04 | 9.00E-05 | 3.29E-04 | 2.13E-04 | 7.30E-05 | 1.00E-04 | 4.46E-04 | 0.006557 | 0        | 8.20E-05 | 0.001163 | 3.50E-05 | 0        |
| 0        | 0        | 0        | 0        | 0        | 0        | 0        | 5.10E-05 | 0        | 3.20E-05 | 0        | 0        | 0        |

|          |          |          |          |          |          |          |          |          |          |          |          |          |
|----------|----------|----------|----------|----------|----------|----------|----------|----------|----------|----------|----------|----------|
| 0        | 2.90E-05 | 0        | 4.88E-04 | 4.10E-05 | 4.70E-05 | 0.002655 | 0.009923 | 1.87E-04 | 3.70E-05 | 1.81E-04 | 8.50E-05 | 0.003991 |
| 0        | 0        | 0        | 0        | 0        | 0        | 0        | 0        | 0        | 0        | 0        | 3.50E-05 | 0        |
| 0        | 0        | 0        | 3.40E-05 | 0        | 3.30E-05 | 8.11E-04 | 7.20E-05 | 1.21E-04 | 3.00E-05 | 5.10E-05 | 3.40E-05 | 0        |
| 0        | 0        | 9.40E-05 | 0        | 7.60E-05 | 3.20E-05 | 0        | 0        | 0        | 0        | 0        | 0        | 4.35E-04 |
| 0        | 0        | 0        | 0        | 0        | 3.00E-05 | 0        | 3.70E-05 | 0        | 0        | 6.06E-04 | 0        | 0        |
| 1.00E-04 | 0        | 0        | 1.04E-04 | 0        | 0        | 1.45E-04 | 1.90E-04 | 0        | 0        | 0        | 0        | 0        |
| 0        | 0        | 0        | 0        | 0        | 0.002513 | 0        | 0        | 0        | 9.47E-04 | 0        | 0        | 0        |
| 0.018914 | 0        | 0        | 0.001589 | 0        | 0        | 6.80E-05 | 1.19E-04 | 0.003471 | 0        | 0        | 1.13E-04 | 2.47E-04 |
| 0        | 1.31E-04 | 3.73E-04 | 3.07E-04 | 0.001973 | 7.64E-04 | 2.35E-04 | 5.50E-05 | 7.36E-04 | 2.70E-04 | 0.001516 | 2.45E-04 | 5.05E-04 |
| 0        | 2.00E-04 | 1.96E-04 | 5.87E-04 | 3.38E-04 | 4.23E-04 | 9.06E-04 | 1.31E-04 | 2.55E-04 | 4.44E-04 | 3.26E-04 | 0        | 2.07E-04 |
| 0        | 0        | 0        | 0        | 0        | 0        | 0        | 0        | 0        | 2.70E-05 | 0        | 0        | 0        |
| 0        | 0        | 4.80E-05 | 0        | 0        | 7.60E-05 | 0        | 0        | 0        | 0        | 2.10E-05 | 0        | 0        |
| 2.94E-04 | 2.00E-04 | 4.34E-04 | 1.48E-04 | 9.55E-04 | 5.13E-04 | 9.03E-04 | 0.002875 | 0        | 0.002034 | 2.60E-05 | 2.47E-04 | 3.27E-04 |
| 0        | 7.50E-05 | 2.70E-05 | 3.50E-05 | 3.70E-05 | 1.02E-04 | 0        | 0.002505 | 0        | 0.002082 | 0.001655 | 2.85E-04 | 1.56E-04 |
| 0        | 0        | 0        | 0        | 0        | 0        | 0        | 0        | 0        | 0        | 0        | 0        | 0        |
| 3.30E-05 | 0        | 4.42E-04 | 7.40E-05 | 7.09E-04 | 1.25E-04 | 9.00E-05 | 0        | 2.03E-04 | 3.00E-05 | 9.60E-05 | 3.90E-05 | 0.001203 |
| 0        | 0        | 1.00E-04 | 4.89E-04 | 3.30E-05 | 6.50E-05 | 0.009224 | 4.35E-04 | 1.04E-04 | 0        | 7.20E-05 | 7.70E-05 | 0        |
| 0        | 0        | 0        | 0        | 0        | 0        | 6.54E-04 | 3.70E-05 | 0        | 0        | 3.60E-05 | 0        | 0        |
| 0        | 0        | 0        | 0        | 0        | 0        | 0        | 9.00E-06 | 0        | 0        | 1.31E-04 | 0        | 0        |
| 0        | 0        | 0        | 0        | 4.22E-04 | 0        | 9.90E-05 | 8.00E-05 | 0        | 0        | 1.04E-04 | 0        | 0        |
| 0        | 0        | 0        | 0        | 0        | 0        | 0        | 0        | 0        | 0        | 0        | 0        | 0        |
| 0        | 0        | 0        | 0        | 0        | 0        | 0        | 0        | 0        | 0        | 0        | 0        | 0        |
| 0        | 9.40E-05 | 2.30E-05 | 0        | 7.10E-05 | 1.05E-04 | 0        | 0.00113  | 0        | 0.001245 | 4.92E-04 | 2.42E-04 | 1.19E-04 |
| 0        | 4.00E-05 | 0        | 0        | 0        | 0        | 0        | 0        | 0        | 0        | 0        | 0        | 0        |
| 3.20E-05 | 3.30E-05 | 9.90E-05 | 0        | 3.40E-05 | 9.60E-05 | 1.10E-05 | 0.001313 | 0        | 0.00129  | 5.72E-04 | 1.72E-04 | 4.20E-05 |
| 0        | 0        | 0        | 0        | 0        | 0        | 0        | 6.70E-05 | 0        | 1.00E-04 | 5.30E-05 | 4.20E-05 | 0        |
| 0        | 0        | 0        | 0        | 0        | 2.70E-05 | 0        | 4.30E-05 | 0        | 0        | 0        | 0        | 0        |
| 0        | 0        | 0        | 0        | 0        | 0        | 0        | 0        | 0        | 0        | 0        | 0        | 0        |
| 0        | 0        | 1.07E-04 | 0        | 0        | 8.60E-05 | 5.10E-05 | 0        | 0        | 0        | 0        | 0        | 0        |
| 0.01202  | 0.002189 | 0.003458 | 0.008315 | 0.00714  | 0.004467 | 0.018649 | 0.03303  | 0.004228 | 0.004942 | 0.006194 | 0.001445 | 0.00747  |

| SC11     | SC13     | SC32     | SC15     | SC19     | SC35     | SC10     | SC02     | SC16     | SC12     | SC18     | SC21     | SC31     |
|----------|----------|----------|----------|----------|----------|----------|----------|----------|----------|----------|----------|----------|
| 0.144364 | 0.13871  | 0.107074 | 0.095059 | 0.088586 | 0.08042  | 0.077033 | 0.065693 | 0.061953 | 0.041175 | 0.03776  | 0.037082 | 0.035628 |
| 0.050998 | 0.044042 | 0.200395 | 0.309121 | 0.006927 | 0.023899 | 1.28E-04 | 0.0779   | 3.99E-04 | 0.671493 | 0.162622 | 0.04662  | 0.174148 |
| 0.108209 | 0.086196 | 0.026623 | 0.116981 | 0.006129 | 0.325152 | 0.365921 | 0.016786 | 0.656487 | 0.030572 | 0.355859 | 0.662632 | 0.361896 |
| 0.11977  | 0.098438 | 0.076596 | 0.043149 | 0.007995 | 0.049572 | 0.118953 | 0.096809 | 0.0836   | 0.067185 | 0.054657 | 0.067226 | 0.121885 |
| 0.16401  | 0.251394 | 0.365423 | 0.105593 | 0.378733 | 0.096955 | 0.181649 | 0.387117 | 1.44E-04 | 0.005834 | 0.110637 | 0.001041 | 0.106153 |
| 0.079204 | 0.159439 | 0.016952 | 0.008736 | 0.022937 | 3.92E-04 | 0.018572 | 0.199056 | 8.50E-05 | 1.15E-04 | 0.01763  | 4.51E-04 | 1.03E-04 |
| 0.001748 | 0.004806 | 3.60E-04 | 0.00108  | 0.056743 | 6.05E-04 | 0.001328 | 2.86E-04 | 3.00E-04 | 0.001012 | 0.001722 | 0.001643 | 3.60E-05 |
| 0.0125   | 0.014866 | 0.01153  | 0.091165 | 0.069067 | 0.004658 | 0.011229 | 0.010029 | 6.10E-05 | 0.004471 | 0.014534 | 0.016822 | 0.008055 |
| 0.016634 | 0.026631 | 0.01961  | 0.019415 | 0.010734 | 0.001043 | 9.40E-05 | 0.049501 | 9.30E-05 | 0.012723 | 0.021463 | 0.01825  | 0        |
| 0.033729 | 0.010042 | 0.012085 | 0.009327 | 0.016496 | 0.020567 | 0.019555 | 0.00166  | 0.043822 | 0.009715 | 0.01704  | 0.037225 | 0.013011 |
| 0.068579 | 0.025919 | 0.01187  | 0.034735 | 6.04E-04 | 0.13391  | 0.009493 | 0.010927 | 0.095015 | 0.011302 | 0.008088 | 0.044622 | 0.028573 |
| 0.022834 | 0.006355 | 0.021906 | 0.036224 | 0.195434 | 0.081078 | 0.011895 | 0.00124  | 1.46E-04 | 0.097239 | 0.014327 | 0.002627 | 0.034925 |
| 0.028113 | 0.034645 | 0.011568 | 0.012636 | 0.012608 | 0.015156 | 0.058069 | 0.014115 | 6.90E-05 | 6.60E-04 | 0.053688 | 0.020141 | 0        |
| 0.007748 | 0.02022  | 0.013914 | 0.006282 | 0.01859  | 0.023695 | 0.00571  | 0.012512 | 0.021127 | 0.01089  | 0.001914 | 2.41E-04 | 0.00882  |
| 0.001597 | 0.001959 | 0.006314 | 0.010908 | 0.010132 | 7.15E-04 | 0.02941  | 1.31E-04 | 3.60E-05 | 0.001589 | 0.002626 | 0        | 0        |
| 0.031985 | 0.002688 | 0.001623 | 0.015413 | 1.30E-04 | 0.015089 | 0.011021 | 5.10E-05 | 0.004622 | 0.007803 | 0.011054 | 0.008635 | 0.035908 |
| 0.009744 | 0.005955 | 0.005733 | 0.004177 | 0.009655 | 5.04E-04 | 0.001034 | 0.001688 | 0.001672 | 0.001763 | 0.001794 | 1.37E-04 | 2.13E-04 |
| 0.022132 | 0.003672 | 0.025723 | 2.64E-04 | 9.37E-04 | 0.034283 | 0.008961 | 0.008046 | 0.001547 | 0        | 0.015016 | 3.26E-04 | 0.052375 |
| 0        | 0        | 0        | 0        | 0        | 0        | 0        | 0        | 0        | 0        | 0        | 3.60E-05 | 0        |
| 0        | 0        | 1.92E-04 | 0        | 0        | 0        | 0        | 0        | 0        | 4.80E-05 | 9.99E-04 | 0        | 0        |
| 1.50E-04 | 2.64E-04 | 1.38E-04 | 0.004194 | 0.001092 | 0.007017 | 0.015663 | 6.00E-05 | 0        | 6.58E-04 | 0.029205 | 0.002875 | 0        |
| 5.32E-04 | 0        | 1.99E-04 | 0.003828 | 0.004031 | 0        | 9.51E-04 | 4.40E-05 | 0        | 8.68E-04 | 3.66E-04 | 0        | 0        |
| 0.001876 | 0.006333 | 0.002275 | 0.011272 | 0.002059 | 3.69E-04 | 0.003549 | 0.001003 | 3.60E-05 | 0.007673 | 0.001341 | 6.10E-04 | 0        |
| 0.002925 | 0.009447 | 0.013439 | 0.006285 | 6.90E-05 | 0.043969 | 0.004847 | 3.40E-05 | 0        | 0.001756 | 0.001648 | 0        | 5.98E-04 |
| 0.002181 | 0.002035 | 0.001227 | 0.009167 | 0.008975 | 1.82E-04 | 0        | 1.15E-04 | 0        | 0.002328 | 0.002455 | 0        | 4.50E-05 |
| 1.41E-04 | 0        | 1.51E-04 | 6.40E-05 | 5.10E-05 | 9.57E-04 | 3.90E-05 | 0        | 3.60E-05 | 0        | 2.40E-04 | 3.20E-05 | 2.30E-05 |
| 0.005637 | 0.009888 | 0.010048 | 0.002091 | 0.007166 | 0.001341 | 0.002105 | 0.00906  | 1.34E-04 | 0.001775 | 9.97E-04 | 0        | 2.04E-04 |
| 2.35E-04 | 0.007162 | 0.002568 | 0.004277 | 3.71E-04 | 1.17E-04 | 0.009712 | 1.99E-04 | 2.50E-05 | 9.79E-04 | 0.001591 | 1.23E-04 | 0        |
| 0.001932 | 1.59E-04 | 0.001399 | 9.40E-04 | 0        | 0.001091 | 6.86E-04 | 0        | 0.004869 | 0        | 0.003054 | 0        | 0.00249  |
| 0.001729 | 0.001501 | 0.00214  | 0.001373 | 0.001281 | 7.50E-05 | 0.003405 | 3.69E-04 | 0        | 2.32E-04 | 0.001876 | 0        | 0        |
| 1.49E-04 | 2.90E-05 | 1.60E-05 | 0        | 2.40E-05 | 1.79E-04 | 0        | 0        | 0        | 0        | 3.10E-05 | 0        | 2.54E-04 |
| 0        | 0.00888  | 0.001382 | 0.005527 | 0.003316 | 0        | 0        | 0        | 0        | 0.001287 | 0.003832 | 0        | 0        |
| 7.67E-04 | 2.79E-04 | 0.001602 | 0.004219 | 8.47E-04 | 4.70E-04 | 0.003298 | 0.006705 | 6.80E-05 | 0.001384 | 0.001904 | 0        | 2.60E-04 |
| 0.002986 | 3.88E-04 | 0.002061 | 0.001148 | 2.50E-05 | 6.20E-05 | 0.009839 | 0        | 0.003692 | 7.48E-04 | 0.001965 | 3.00E-04 | 0.00201  |
| 0.003334 | 7.78E-04 | 8.30E-05 | 1.41E-04 | 2.70E-05 | 1.60E-05 | 0        | 2.72E-04 | 0        | 0        | 0.001939 | 4.22E-04 | 0        |
| 0        | 0        | 0        | 0        | 0        | 0        | 0        | 0        | 0        | 0        | 0        | 0        | 0        |
| 2.76E-04 | 4.22E-04 | 8.66E-04 | 7.76E-04 | 0.00725  | 0.004213 | 0        | 7.10E-05 | 0        | 0        | 0.005659 | 0        | 3.50E-04 |
| 0.017368 | 1.09E-04 | 0        | 4.11E-04 | 2.22E-04 | 0.010682 | 0        | 2.40E-05 | 0        | 0        | 0.00108  | 2.86E-04 | 2.10E-05 |
| 0.001393 | 0.00138  | 0.001406 | 6.02E-04 | 0.0116   | 6.50E-05 | 1.04E-04 | 2.31E-04 | 0        | 5.70E-05 | 0.003001 | 0        | 0        |
| 0        | 0        | 0        | 0        | 0        | 0        | 0        | 0        | 3.20E-05 | 0        | 6.00E-05 | 0        | 1.01E-04 |
| 3.35E-04 | 1.16E-04 | 8.60E-05 | 0        | 0.001544 | 1.31E-04 | 9.80E-05 | 1.32E-04 | 1.40E-05 | 0        | 4.70E-05 | 0        | 0        |
| 6.88E-04 | 0.001811 | 2.64E-04 | 6.25E-04 | 0.001481 | 1.20E-05 | 2.45E-04 | 0.019509 | 0        | 2.31E-04 | 0.00222  | 4.01E-04 | 0        |
| 4.67E-04 | 2.60E-04 | 7.33E-04 | 0.006567 | 2.11E-04 | 0        | 0        | 0        | 0        | 0        | 5.70E-04 | 0        | 2.60E-05 |
| 6.69E-04 | 1.13E-04 | 2.80E-05 | 0.001754 | 5.70E-05 | 3.26E-04 | 0.001391 | 0        | 0.00472  | 0        | 0.001124 | 0.0088   | 0        |
| 1.70E-04 | 0.001265 | 4.42E-04 | 0        | 1.63E-04 | 8.70E-05 | 0        | 2.30E-05 | 4.40E-05 | 0        | 0.001384 | 0        | 0        |
| 6.55E-04 | 4.26E-04 | 0.005245 | 4.78E-04 | 0.001779 | 0.00126  | 0.000649 | 7.31E-04 | 6.80E-05 | 1.17E-04 | 0.004428 | 0.00404  | 5.48E-04 |
| 4.20E-05 | 0        | 5.10E-05 | 0        | 0        | 1.14E-04 | 0        | 0        | 3.60E-05 | 0        | 3.10E-05 | 0        | 2.22E-04 |
| 3.48E-04 | 4.76E-04 | 9.29E-04 | 0        | 0.001962 | 2.60E-04 | 0.001679 | 2.35E-04 | 0        | 0        | 2.14E-04 | 2.80E-05 | 0        |
| 0.005856 | 0.003227 | 6.60E-05 | 1.49E-04 | 4.30E-04 | 2.11E-04 | 0        | 0.001267 | 0        | 0        | 7.00E-05 | 5.30E-05 | 2.10E-05 |
| 8.50E-04 | 3.30E-05 | 3.00E-05 | 6.80E-05 | 0        | 0.003695 | 0        | 0        | 3.00E-05 | 6.70E-05 | 0.002853 | 1.79E-04 | 2.80E-05 |
| 2.02E-04 | 5.90E-05 | 7.03E-04 | 2.03E-04 | 9.50E-05 | 0        | 0        | 0        | 0        | 1.19E-04 | 0.001912 | 0        | 0        |
| 9.42E-04 | 3.36E-04 | 4.62E-04 | 0        | 6.65E-04 | 5.11E-04 | 0        | 4.70E-05 | 0        | 0        | 4.19E-04 | 0        | 0        |
| 0        | 0        | 0        | 0        | 0        | 0        | 0        | 0        | 0        | 0        | 0        | 0        | 3.50E-05 |
| 0        | 0        | 1.60E-05 | 0        | 0        | 0        | 0        | 0        | 0        | 0        | 0        | 0        | 0        |
| 0.002676 | 1.55E-04 | 4.23E-04 | 1.96E-04 | 5.07E-04 | 4.78E-04 | 0        | 1.70E-05 | 0        | 0        | 7.39E-04 | 3.39E-04 | 0        |
| 1.80E-05 | 3.30E-05 | 4.30E-05 | 0        | 0        | 1.05E-04 | 0        | 2.50E-05 | 0        | 0        | 6.40E-05 | 0        | 2.10E-05 |

|          |          |          |          |          |          |          |          |          |          |          |          |          |
|----------|----------|----------|----------|----------|----------|----------|----------|----------|----------|----------|----------|----------|
| 4.56E-04 | 1.23E-04 | 1.67E-04 | 0        | 5.28E-04 | 2.07E-04 | 0        | 1.36E-04 | 0        | 0        | 2.56E-04 | 0        | 3.10E-05 |
| 2.30E-05 | 2.40E-05 | 2.90E-05 | 0        | 0        | 3.50E-05 | 0        | 0        | 0        | 0        | 0        | 0        | 2.50E-05 |
| 3.30E-05 | 0        | 7.40E-05 | 0        | 0        | 0        | 0        | 0        | 6.30E-05 | 0        | 0        | 0        | 0        |
| 1.70E-05 | 7.49E-04 | 0        | 1.06E-04 | 0        | 0        | 0        | 5.63E-04 | 0        | 0        | 4.85E-04 | 7.41E-04 | 0        |
| 4.85E-04 | 0        | 0        | 0        | 0        | 0        | 0        | 0        | 0        | 0        | 2.70E-05 | 0        | 0.001455 |
| 0        | 0        | 1.60E-05 | 0        | 0        | 0        | 0        | 0        | 3.00E-05 | 0        | 0        | 0        | 7.60E-05 |
| 0        | 0        | 0        | 0        | 0        | 0        | 0        | 0        | 0        | 0        | 0.00353  | 0        | 0        |
| 2.80E-05 | 0        | 6.40E-05 | 0.00093  | 0.004807 | 1.80E-05 | 0        | 2.00E-05 | 0        | 0        | 0        | 0        | 0        |
| 0.001093 | 6.78E-04 | 1.30E-04 | 0.001756 | 3.20E-05 | 0.003498 | 5.35E-04 | 7.10E-05 | 0.008928 | 5.29E-04 | 2.56E-04 | 0.006802 | 0        |
| 1.20E-04 | 9.40E-05 | 3.90E-05 | 4.69E-04 | 0        | 6.42E-04 | 9.96E-04 | 0        | 0.002425 | 6.50E-05 | 2.44E-04 | 0.003139 | 0        |
| 0        | 0        | 1.95E-04 | 0        | 0        | 3.20E-05 | 0        | 0        | 0        | 0        | 0        | 0        | 0        |
| 1.80E-04 | 0        | 2.20E-05 | 0        | 0        | 0        | 0        | 1.40E-05 | 3.00E-05 | 0        | 0        | 0        | 0        |
| 2.00E-05 | 3.03E-04 | 4.50E-05 | 0.001435 | 0.012817 | 2.10E-05 | 9.41E-04 | 1.90E-05 | 0        | 1.26E-04 | 1.07E-04 | 0        | 1.55E-04 |
| 0.001793 | 3.35E-04 | 0.002133 | 7.00E-05 | 9.30E-05 | 0.00214  | 0.001008 | 9.78E-04 | 1.30E-04 | 0        | 0.001069 | 0        | 0.003804 |
| 0        | 0        | 0        | 0        | 0        | 0        | 0        | 0        | 0        | 0        | 0        | 0        | 0        |
| 2.75E-04 | 1.85E-04 | 1.96E-04 | 1.78E-04 | 0        | 0        | 0        | 7.00E-05 | 0        | 1.09E-04 | 0.002265 | 5.35E-04 | 2.30E-05 |
| 7.70E-05 | 1.38E-04 | 4.22E-04 | 0        | 2.40E-05 | 1.09E-04 | 0        | 2.90E-05 | 0        | 0        | 5.40E-05 | 0        | 0        |
| 0        | 0        | 0        | 0        | 0        | 1.90E-05 | 0        | 0        | 0        | 0        | 0.001022 | 0        | 0        |
| 0        | 0        | 1.21E-04 | 0        | 8.80E-05 | 0        | 0        | 0        | 0        | 0        | 0        | 0        | 0        |
| 5.73E-04 | 0        | 0        | 0        | 6.00E-05 | 0        | 0        | 0        | 0        | 0        | 0        | 0        | 0        |
| 0        | 0        | 0        | 0        | 0        | 0        | 0        | 0        | 0        | 0        | 0        | 0        | 0        |
| 0        | 0        | 0        | 0        | 0        | 0        | 0        | 0        | 0        | 0        | 0        | 0        | 0        |
| 0        | 0        | 0        | 0        | 0        | 0        | 0        | 0        | 0        | 0        | 0        | 0        | 0        |
| 8.48E-04 | 1.76E-04 | 0.001255 | 6.90E-05 | 5.30E-05 | 0.001642 | 4.44E-04 | 3.43E-04 | 0        | 0        | 5.74E-04 | 8.60E-05 | 0.001886 |
| 0        | 0        | 0        | 0        | 0        | 0        | 0        | 0        | 0        | 0        | 6.30E-05 | 0        | 0        |
| 0.001219 | 3.14E-04 | 0.001104 | 0        | 7.10E-05 | 0.00159  | 4.74E-04 | 4.43E-04 | 1.58E-04 | 5.00E-05 | 8.18E-04 | 0        | 0.001506 |
| 3.80E-05 | 0        | 4.80E-05 | 0        | 0        | 8.80E-05 | 3.90E-05 | 2.90E-05 | 0        | 0        | 2.80E-05 | 0        | 3.80E-05 |
| 0.00102  | 0        | 4.90E-05 | 0        | 3.50E-05 | 2.20E-05 | 3.40E-05 | 0        | 0        | 0        | 0        | 0        | 4.22E-04 |
| 0        | 0        | 0        | 0        | 0        | 0        | 0        | 0        | 0        | 0        | 0        | 0        | 0        |
| 3.71E-04 | 0        | 0        | 0        | 0        | 0        | 0        | 0        | 0        | 0        | 0        | 0        | 0        |
| 0.009904 | 0.00354  | 0.007879 | 0.008367 | 0.011655 | 0.004249 | 0.007214 | 0.003565 | 0.003254 | 0.003253 | 0.007453 | 0.004452 | 0.001593 |



| SC34     | SC24     | SC05     | SC36     | SC06     | SC14     | SC30     | SC33     | ID...112                     | H042     | H008     | H130     | H036     |
|----------|----------|----------|----------|----------|----------|----------|----------|------------------------------|----------|----------|----------|----------|
| 0.032309 | 0.030666 | 0.029585 | 0.028504 | 0.027675 | 0.021897 | 0.018509 | 0.003443 | Prevotella                   | 0.473924 | 0.422388 | 0.404445 | 0.387203 |
| 0.001338 | 0.235355 | 0.830866 | 0.036111 | 0.085712 | 0.153867 | 0.220936 | 0.263213 | Neisseria                    | 0.00924  | 0.025544 | 0.009113 | 0.063338 |
| 0.104497 | 0.023755 | 0.015885 | 0.032512 | 0.038885 | 0.284124 | 0.301783 | 0.3916   | Streptococcus                | 0.040448 | 0.059484 | 0.103768 | 0.032294 |
| 0.016212 | 0.028308 | 0.001509 | 0.216036 | 0.062988 | 0.076083 | 0.0569   | 0.011604 | Veillonella                  | 0.154125 | 0.10381  | 0.171179 | 0.123626 |
| 0.125058 | 0.081217 | 0.038751 | 0.141456 | 0.06187  | 0.053533 | 0.064643 | 0.02975  | Leptotrichia                 | 0.026298 | 0.069583 | 0.051983 | 0.037326 |
| 0.003844 | 0.034746 | 0.001787 | 0.028786 | 0.007979 | 0.017394 | 0.020474 | 0.004246 | Fusobacterium                | 0.018866 | 0.018081 | 0.012966 | 0.094612 |
| 3.43E-04 | 0.005998 | 0.001321 | 0.064742 | 0.014602 | 0.001567 | 2.57E-04 | 8.60E-05 | Alloprevotella               | 0.065989 | 0.086973 | 0.044196 | 0.049221 |
| 0.046257 | 0.050077 | 0.016314 | 0.088722 | 0.096924 | 0.02666  | 0.024188 | 0.037451 | Porphyromonas                | 0.004249 | 0.004692 | 0.01036  | 0.024621 |
| 2.92E-04 | 0.152385 | 0.008273 | 0.104502 | 0.03826  | 0.059614 | 0.022764 | 0.007638 | Haemophilus                  | 0.010931 | 0.011254 | 0.009696 | 0.026878 |
| 0.064076 | 0.0047   | 1.09E-04 | 0.00299  | 0.005374 | 0.030748 | 0.007912 | 0.008048 | Actinomyces                  | 0.040584 | 0.020976 | 0.023147 | 0.022681 |
| 0.020882 | 0.047574 | 0.00105  | 0.008022 | 0.001216 | 0.016825 | 0.013943 | 0.093106 | Rothia                       | 0.004809 | 0.00236  | 0.004368 | 0.009072 |
| 0.050379 | 0.045293 | 0.031527 | 0.026085 | 0.076991 | 0.041509 | 0.032544 | 0.033136 | Capnocytophaga               | 8.79E-04 | 3.29E-04 | 0.00217  | 0.005867 |
| 0.006534 | 0.003569 | 0.006232 | 0.015676 | 0.005691 | 0.009449 | 0.073992 | 0.001623 | Gemella                      | 3.04E-04 | 0.001985 | 0.002946 | 0.005911 |
| 0.111551 | 0.015443 | 0.001075 | 0.031954 | 0.002218 | 0.003438 | 0.00546  | 0.004084 | Lachnoanaerobaculum          | 0.017485 | 0.00914  | 0.006162 | 0.020378 |
| 0.082919 | 0.020483 | 3.80E-05 | 0.003521 | 0.001452 | 6.61E-04 | 0.001667 | 3.78E-04 | TM7x                         | 0.007864 | 0.020591 | 0.021673 | 0.004299 |
| 0.015113 | 0.003741 | 1.02E-04 | 2.22E-04 | 0.008855 | 0.004645 | 0.006658 | 0.032762 | Granulicatella               | 0.001543 | 0.002152 | 0.007367 | 0.004121 |
| 2.50E-05 | 0.00171  | 2.06E-04 | 0.001824 | 0.001662 | 0.004774 | 0.001504 | 1.14E-04 | Campylobacter                | 0.015428 | 0.01277  | 0.003309 | 0.005488 |
| 0.009356 | 0        | 3.60E-05 | 4.66E-04 | 0.37646  | 0.036032 | 0.006454 | 0.004582 | Halomonas                    | 3.10E-05 | 2.20E-05 | 0        | 0        |
| 0        | 1.41E-04 | 0        | 0        | 0        | 3.40E-05 | 0        | 0        | Moraxella                    | 0        | 0        | 0        | 0        |
| 3.10E-05 | 0        | 0        | 4.90E-05 | 0.006272 | 0.01511  | 0        | 0        | Actinobacillus               | 7.00E-05 | 0.002899 | 5.73E-04 | 1.92E-04 |
| 8.45E-04 | 0.141417 | 0        | 0        | 8.28E-04 | 0.056613 | 0.013923 | 0.052481 | Lautropia                    | 6.85E-04 | 8.34E-04 | 0.001905 | 0.001976 |
| 0.018565 | 3.79E-04 | 0        | 0.001099 | 0        | 8.90E-05 | 0.001016 | 0        | g_Absconditobacterium        | 8.96E-04 | 3.09E-04 | 3.70E-05 | 0.007349 |
| 0.05791  | 0.004566 | 3.80E-05 | 0.004397 | 0.002769 | 0.002389 | 0.003204 | 1.12E-04 | Ornbacterium                 | 0.004041 | 0.00752  | 0.005647 | 0.006554 |
| 0.019696 | 7.00E-04 | 0.008018 | 0.105845 | 0.001423 | 0.003162 | 0.005136 | 1.53E-04 | Peptostreptococcus           | 6.37E-04 | 8.19E-04 | 5.07E-04 | 0.006045 |
| 0.004196 | 0.001727 | 1.36E-04 | 0.001296 | 5.82E-04 | 0.021929 | 0.007727 | 0        | Selenomonas                  | 0.010033 | 0.003993 | 0.012073 | 2.22E-04 |
| 1.04E-04 | 1.80E-05 | 8.20E-05 | 9.90E-05 | 1.25E-04 | 3.08E-04 | 1.53E-04 | 3.30E-05 | Bacteroides                  | 7.00E-05 | 4.54E-04 | 5.00E-05 | 0        |
| 0.018328 | 0.002179 | 0.001205 | 0.020302 | 6.06E-04 | 1.47E-04 | 4.65E-04 | 3.11E-04 | Solobacterium                | 0.002111 | 0.011241 | 0.004928 | 0.004798 |
| 0.011926 | 1.75E-04 | 0        | 1.47E-04 | 8.80E-05 | 2.34E-04 | 0.001008 | 0        | Stomatobaculum               | 0.007857 | 0.007188 | 0.00363  | 0.010584 |
| 4.06E-04 | 2.50E-05 | 0        | 0        | 5.40E-05 | 4.50E-05 | 0        | 0        | Megasphaera                  | 0.008996 | 0.03357  | 0.011823 | 0.00944  |
| 0.035004 | 0.012149 | 0        | 0.001035 | 2.91E-04 | 2.83E-04 | 0.002495 | 1.27E-04 | Clostridia - ICG 014         | 0.006731 | 0.005089 | 0.001122 | 0.009342 |
| 0        | 0        | 0        | 0        | 1.97E-04 | 0        | 0        | 0        | Pseudomonas                  | 4.01E-04 | 8.82E-04 | 5.82E-04 | 6.60E-05 |
| 0.016052 | 0.002348 | 3.10E-05 | 2.05E-04 | 1.00E-05 | 7.90E-05 | 7.80E-05 | 0        | Lachnospiraceae unclassified | 0.029929 | 0.013657 | 0.009953 | 1.72E-04 |
| 0.008205 | 6.82E-04 | 1.49E-04 | 9.30E-05 | 0.001027 | 2.52E-04 | 0.00194  | 8.10E-05 | Leubacterium nodatum         | 0.002055 | 0.002725 | 0.001122 | 0.004193 |
| 0.007071 | 1.08E-04 | 1.82E-04 | 4.83E-04 | 1.99E-04 | 3.92E-04 | 6.95E-04 | 1.98E-04 | Atopobium                    | 0.009837 | 0.020716 | 0.006575 | 0.001815 |
| 0        | 0.001508 | 0        | 1.03E-04 | 5.70E-05 | 7.18E-04 | 7.07E-04 | 0        | Aggregatibacter              | 0.001175 | 3.83E-04 | 0.007425 | 0.002809 |
| 0        | 0        | 0        | 0        | 0        | 0        | 0        | 0        | Muribaculaceae               | 6.30E-05 | 0        | 0        | 5.60E-05 |
| 0.044136 | 1.00E-04 | 0        | 0        | 4.30E-05 | 0.003375 | 0.0055   | 5.48E-04 | Tannerella                   | 3.92E-04 | 3.72E-04 | 3.80E-04 | 0.002316 |
| 1.95E-04 | 0.011011 | 0        | 4.50E-05 | 0        | 0.004011 | 0.002516 | 0        | Corynebacterium              | 3.45E-04 | 4.22E-04 | 0.001443 | 1.82E-04 |
| 2.80E-04 | 8.20E-05 | 5.10E-05 | 7.88E-04 | 1.15E-04 | 0.001108 | 0.005163 | 2.78E-04 | Treponema                    | 0.001238 | 3.19E-04 | 0.002775 | 2.42E-04 |
| 0        | 0        | 4.00E-05 | 0        | 2.00E-05 | 0        | 0        | 2.20E-05 | Faecalibacterium             | 9.80E-05 | 1.76E-04 | 0        | 6.70E-05 |
| 6.90E-05 | 2.62E-04 | 0        | 1.85E-04 | 0        | 7.10E-05 | 2.99E-04 | 5.80E-05 | Lachnospiraceae unclassified | 3.07E-04 | 6.50E-05 | 0        | 5.80E-05 |
| 0        | 0.019566 | 4.14E-04 | 4.90E-05 | 2.92E-04 | 0.004088 | 0.006715 | 1.43E-04 | Neisseriaceae unclassified   | 1.48E-04 | 8.40E-05 | 8.20E-05 | 3.40E-04 |
| 0.001484 | 2.40E-05 | 0        | 1.36E-04 | 0        | 0        | 0.002203 | 7.40E-05 | Saccharimonadales            | 0.006293 | 9.20E-04 | 0.010375 | 0        |
| 0.001281 | 2.62E-04 | 0        | 0        | 8.40E-05 | 3.07E-04 | 1.81E-04 | 9.65E-04 | Lactobacillales unclassified | 0        | 5.55E-04 | 0.000649 | 7.46E-04 |
| 0.007477 | 1.93E-04 | 0        | 5.21E-04 | 1.24E-04 | 9.12E-04 | 6.41E-04 | 4.18E-04 | Parvimonas                   | 1.53E-04 | 3.80E-05 | 0.001091 | 0.001717 |
| 5.18E-04 | 0.001683 | 6.70E-05 | 0.001007 | 0.00146  | 7.92E-04 | 9.66E-04 | 0.001826 | Bergeyella                   | 1.83E-04 | 7.34E-04 | 0.001307 | 4.00E-04 |
| 2.20E-05 | 0        | 0        | 0        | 6.53E-04 | 5.70E-05 | 0        | 3.00E-05 | Rhodococcus                  | 0        | 1.04E-04 | 0        | 1.75E-04 |
| 0.025414 | 7.20E-05 | 0        | 0        | 5.60E-05 | 0.002431 | 0.001417 | 0        | Johnsonella                  | 1.73E-04 | 5.20E-05 | 1.10E-04 | 1.17E-04 |
| 0        | 0        | 8.20E-05 | 4.80E-05 | 0        | 9.03E-04 | 0.005702 | 8.87E-04 | F0332                        | 0.001265 | 4.10E-05 | 0.00142  | 0        |
| 2.76E-04 | 0.001535 | 0        | 9.69E-04 | 1.69E-04 | 0.002372 | 8.04E-04 | 0        | Abiotrophia                  | 0        | 1.60E-05 | 4.00E-05 | 1.60E-04 |
| 0.0029   | 0        | 0        | 5.10E-05 | 1.56E-04 | 0.002469 | 0.001065 | 0        | Filifactor                   | 5.64E-04 | 3.70E-05 | 3.56E-04 | 0.001003 |
| 0        | 0        | 0        | 0.001153 | 1.10E-05 | 9.57E-04 | 8.51E-04 | 9.10E-05 | Dialister                    | 5.00E-04 | 0.001592 | 0.001977 | 1.23E-04 |
| 3.20E-05 | 0        | 0        | 0        | 0        | 0        | 0        | 0        | Lachnospiraceae NK4          | 0        | 2.40E-05 | 0        | 0        |
| 3.60E-05 | 0        | 0        | 0        | 0        | 3.90E-05 | 0        | 0        | Fusicatembacter              | 0        | 1.64E-04 | 0        | 1.29E-04 |
| 3.91E-04 | 1.90E-05 | 4.00E-05 | 2.03E-04 | 0        | 0.00569  | 0.005298 | 1.90E-05 | Saccharimonadaceae           | 9.61E-04 | 3.20E-05 | 6.45E-04 | 1.13E-04 |
| 3.70E-05 | 0        | 0        | 0        | 4.54E-04 | 0        | 0        | 1.90E-05 | Achetobacter                 | 9.20E-05 | 1.25E-04 | 0        | 0        |

|          |          |          |          |          |          |          |          |                              |          |          |          |          |
|----------|----------|----------|----------|----------|----------|----------|----------|------------------------------|----------|----------|----------|----------|
| 0.002789 | 7.70E-05 | 0        | 3.83E-04 | 0        | 1.81E-04 | 9.45E-04 | 0        | F0058                        | 5.20E-05 | 1.08E-04 | 1.12E-04 | 5.40E-05 |
| 0        | 0        | 0        | 0        | 2.45E-04 | 7.10E-05 | 0        | 0        | Sphingomonas                 | 0        | 6.00E-05 | 0        | 0        |
| 2.90E-05 | 0        | 2.12E-04 | 1.06E-04 | 2.30E-05 | 0        | 0        | 0        | Bifidobacterium              | 0        | 7.38E-04 | 4.20E-05 | 6.50E-05 |
| 0        | 9.60E-05 | 2.80E-05 | 4.50E-05 | 1.51E-04 | 0.001829 | 6.16E-04 | 0        | Kingella                     | 2.69E-04 | 1.50E-05 | 8.50E-05 | 6.50E-05 |
| 0        | 0        | 0        | 0        | 0        | 0        | 0        | 5.10E-05 | Lactobacillus                | 0        | 0        | 1.18E-04 | 0        |
| 0        | 0        | 0        | 0        | 0        | 0        | 7.60E-05 | 0        | Roseburia                    | 2.05E-04 | 4.00E-05 | 2.21E-04 | 0        |
| 0        | 0        | 0        | 0        | 0        | 0        | 0        | 0        | Leptotrichaceae unclassified | 0        | 0        | 0        | 0.004146 |
| 0.001278 | 0.001536 | 0.001228 | 0.015151 | 7.67E-04 | 2.83E-04 | 3.17E-04 | 0        | Amnipylophilus               | 0        | 0        | 0        | 0        |
| 5.68E-04 | 2.39E-04 | 7.00E-05 | 1.78E-04 | 0        | 1.83E-04 | 5.24E-04 | 0.006183 | Bacterium unclassified       | 4.80E-05 | 0        | 7.30E-05 | 5.20E-05 |
| 0.001202 | 0        | 0        | 8.20E-05 | 0        | 1.32E-04 | 1.81E-04 | 5.90E-04 | Actinobacteria unclassified  | 7.10E-05 | 0        | 1.84E-04 | 6.00E-05 |
| 0        | 0        | 0        | 0        | 0        | 0        | 0        | 5.36E-04 | Megamonas                    | 4.70E-05 | 4.80E-05 | 4.10E-05 | 0        |
| 0        | 0        | 0        | 0        | 0        | 0.00301  | 0.00892  | 1.83E-04 | Scardovia                    | 7.60E-05 | 0        | 0.005802 | 0        |
| 4.06E-04 | 3.37E-04 | 0        | 3.40E-05 | 0        | 0        | 0        | 0        | Butyrivibrio                 | 5.41E-04 | 3.87E-04 | 2.26E-04 | 1.19E-04 |
| 0.00132  | 0        | 4.60E-05 | 5.10E-05 | 0.022759 | 0.003094 | 6.01E-04 | 2.98E-04 | Pelagibacterium              | 0        | 0        | 0        | 0        |
| 0        | 0        | 0        | 0        | 0        | 0        | 0        | 0        | Leubacterium                 | 0        | 6.40E-05 | 0        | 0        |
| 0        | 3.60E-04 | 4.19E-04 | 1.49E-04 | 0        | 0.001503 | 0.001752 | 4.56E-04 | Burkholderia                 | 0        | 0        | 0        | 0        |
| 0        | 0        | 2.61E-04 | 6.02E-04 | 0        | 1.14E-04 | 7.41E-04 | 2.10E-05 | Shuttleworthia               | 7.16E-04 | 4.70E-05 | 1.45E-04 | 0        |
| 0        | 0        | 0        | 0        | 0        | 3.24E-04 | 0        | 0        | Selenomonas                  | 1.84E-04 | 0.002169 | 0.003906 | 0        |
| 8.77E-04 | 0        | 0        | 0        | 0        | 0        | 0        | 0        | Chlorococcaceae unclassified | 0        | 2.50E-05 | 0        | 0        |
| 0        | 0        | 3.90E-05 | 4.90E-05 | 0        | 3.50E-05 | 2.31E-04 | 0        | Gracilbacterium              | 0        | 0        | 0        | 1.14E-04 |
| 0        | 0        | 0        | 0        | 0        | 0        | 0        | 0        | Hemicobacterium              | 2.00E-05 | 0        | 0        | 0        |
| 0        | 0        | 0        | 0        | 0        | 0        | 0        | 0        | Prevotellaceae NK3B          | 0        | 0        | 0        | 0        |
| 0        | 0        | 0        | 0        | 0        | 0        | 0        | 0        | Acholeplasma                 | 1.76E-04 | 0        | 0        | 0        |
| 3.69E-04 | 0        | 0        | 0        | 0.01631  | 0.001139 | 5.93E-04 | 3.23E-04 | Xanthomonas                  | 0        | 0        | 0        | 0        |
| 0        | 0        | 0        | 1.92E-04 | 0        | 0        | 0        | 2.60E-05 | Phascolarctobacterium        | 0        | 4.80E-05 | 0        | 0        |
| 6.41E-04 | 0        | 0        | 6.20E-05 | 0.014996 | 0.001568 | 5.11E-04 | 1.82E-04 | Rhizobiaceae unclassified    | 0        | 0        | 0        | 0        |
| 8.30E-05 | 0        | 0        | 0        | 0.001588 | 1.45E-04 | 1.15E-04 | 2.00E-05 | Serratia                     | 3.10E-05 | 2.10E-05 | 0        | 6.10E-05 |
| 9.40E-05 | 0        | 0        | 0        | 0        | 0        | 0        | 1.69E-04 | Chloroplast                  | 0        | 0        | 0        | 0        |
| 0        | 0        | 0        | 0        | 0        | 0        | 0        | 0        | Mucispirillum                | 2.70E-05 | 0        | 0        | 0        |
| 0        | 0        | 0        | 0        | 0        | 5.80E-05 | 0        | 0        | Propionibacterium            | 0        | 0        | 3.41E-04 | 0        |
| 0.016472 | 0.009404 | 0.002496 | 0.010477 | 0.010182 | 0.012145 | 0.025421 | 0.005224 | Others                       | 0.006241 | 0.005945 | 0.009254 | 0.004827 |

| H038     | H016     | H019     | H079     | H041     | H073     | H056     | H100     | H136     | H103     | H094     | H138     | H114     |
|----------|----------|----------|----------|----------|----------|----------|----------|----------|----------|----------|----------|----------|
| 0.381254 | 0.37871  | 0.371931 | 0.367292 | 0.362583 | 0.359749 | 0.358848 | 0.327605 | 0.313487 | 0.307879 | 0.307194 | 0.306685 | 0.297949 |
| 0.086868 | 0.041195 | 0.010986 | 0.012101 | 0.008348 | 0.014759 | 6.95E-04 | 0.017383 | 0.1009   | 0.083826 | 0.163439 | 0.209425 | 0.155366 |
| 0.028857 | 0.025617 | 0.049806 | 0.035346 | 0.010369 | 0.109846 | 0.103215 | 0.093588 | 0.077425 | 0.028633 | 0.022863 | 0.033937 | 0.030028 |
| 0.088481 | 0.145898 | 0.132626 | 0.181333 | 0.150754 | 0.106322 | 0.18089  | 0.126314 | 0.211845 | 0.09863  | 0.08995  | 0.086863 | 0.091082 |
| 0.088805 | 0.137832 | 0.042117 | 0.050242 | 0.148423 | 0.045557 | 0.008228 | 0.05456  | 0.034807 | 0.036201 | 0.075802 | 0.054586 | 0.017178 |
| 0.037873 | 0.034746 | 0.061182 | 0.055416 | 0.011816 | 0.019763 | 0.02186  | 0.023577 | 0.027831 | 0.110731 | 0.03291  | 0.020757 | 0.084118 |
| 0.079137 | 0.041363 | 0.125171 | 0.069281 | 0.036424 | 0.080918 | 0.075471 | 0.105118 | 0.038024 | 0.026886 | 0.067676 | 0.048897 | 0.048871 |
| 0.015777 | 0.00613  | 0.005587 | 0.011873 | 0.001781 | 0.016111 | 0.033495 | 0.002131 | 0.004022 | 0.063907 | 0.024183 | 0.005246 | 0.020862 |
| 0.00808  | 0.005598 | 0.015031 | 0.009125 | 0.003437 | 0.032374 | 0.004495 | 0.042874 | 0.013309 | 0.013908 | 0.020416 | 0.039398 | 0.054831 |
| 0.038099 | 0.012231 | 0.024279 | 0.020102 | 0.0393   | 0.033621 | 0.020735 | 0.024015 | 0.022745 | 0.01935  | 0.026813 | 0.037687 | 0.044749 |
| 0.006847 | 0.006034 | 0.00924  | 0.009048 | 0.00173  | 0.008944 | 0.018313 | 0.004514 | 0.01302  | 0.01028  | 0.014221 | 0.011676 | 0.022285 |
| 0.002721 | 0.002209 | 0.0031   | 5.41E-04 | 4.45E-04 | 0.004728 | 0.001802 | 8.99E-04 | 0.00837  | 0.01331  | 0.003717 | 0.002499 | 0.01525  |
| 0.001371 | 6.47E-04 | 0.002486 | 0.001159 | 3.15E-04 | 0.001532 | 0.005497 | 0.004267 | 0.001602 | 0.004089 | 0.001215 | 0.002121 | 0.002354 |
| 0.021322 | 0.023077 | 0.014832 | 0.015843 | 0.017348 | 0.011723 | 0.005282 | 0.013092 | 0.006718 | 0.026185 | 0.016383 | 0.013822 | 0.009894 |
| 0.026344 | 0.017835 | 0.008596 | 0.017779 | 0.042749 | 0.026644 | 0.001054 | 0.046241 | 0.010679 | 0.029691 | 0.025655 | 0.013352 | 0.004927 |
| 0.00146  | 0.002005 | 0.005505 | 0.004412 | 0.001343 | 0.008529 | 0.009273 | 0.004564 | 0.004417 | 0.007444 | 0.012687 | 0.008649 | 0.003556 |
| 0.008378 | 0.008187 | 0.023339 | 0.020756 | 0.004784 | 0.010023 | 0.010729 | 0.013671 | 0.017885 | 0.005473 | 0.011032 | 0.00736  | 0.011828 |
| 0        | 0        | 0        | 0        | 3.60E-05 | 1.01E-04 | 1.96E-04 | 1.35E-04 | 9.40E-05 | 1.75E-04 | 4.50E-05 | 6.40E-05 | 4.50E-05 |
| 0        | 0        | 0        | 0        | 0        | 0        | 0        | 0        | 0        | 0        | 0        | 0        | 1.80E-05 |
| 2.20E-05 | 3.20E-04 | 6.32E-04 | 8.10E-05 | 2.80E-05 | 0.001166 | 0.001324 | 1.23E-04 | 2.30E-05 | 3.53E-04 | 1.62E-04 | 0.002267 | 0.014548 |
| 0.001502 | 1.40E-04 | 4.02E-04 | 0        | 3.11E-04 | 0.002041 | 4.37E-04 | 7.02E-04 | 0.001361 | 3.51E-04 | 2.70E-04 | 7.02E-04 | 0.004175 |
| 2.80E-05 | 3.60E-05 | 2.93E-04 | 0.016272 | 9.20E-05 | 5.40E-05 | 4.63E-04 | 0.002762 | 6.01E-04 | 0.002105 | 0.010077 | 3.84E-04 | 1.94E-04 |
| 0.005015 | 0.007477 | 0.008555 | 0.008132 | 0.007613 | 0.009513 | 0.005872 | 0.010258 | 0.019099 | 0.004594 | 0.004585 | 0.004873 | 0.004636 |
| 0.005831 | 0.004931 | 0.001535 | 0.004374 | 0.001584 | 0.001632 | 6.92E-04 | 0.002106 | 0.002341 | 0.004768 | 0.00204  | 0.00258  | 0.002583 |
| 0.004562 | 0.018156 | 0.004355 | 0.003941 | 0.013575 | 0.00622  | 0.004339 | 0.007039 | 0.01088  | 0.002999 | 0.004556 | 0.002479 | 0.002185 |
| 1.07E-04 | 3.30E-05 | 1.13E-04 | 1.07E-04 | 6.00E-05 | 1.98E-04 | 7.56E-04 | 0.00109  | 2.70E-05 | 1.09E-04 | 1.13E-04 | 4.70E-05 | 1.11E-04 |
| 0.004439 | 0.004211 | 0.00915  | 0.003994 | 0.009416 | 0.003153 | 0.006229 | 0.001783 | 0.004149 | 0.003217 | 0.013071 | 0.021514 | 0.002475 |
| 0.004506 | 0.007117 | 0.012287 | 0.01262  | 0.006838 | 0.005341 | 0.004918 | 0.015234 | 0.003558 | 0.011182 | 0.005203 | 0.010185 | 0.008021 |
| 0.005141 | 0.007091 | 0.016337 | 0.032431 | 0.045986 | 0.009477 | 0.018094 | 0.008704 | 0.01439  | 0.00392  | 0.010237 | 0.004527 | 0.003734 |
| 0.003842 | 9.07E-04 | 0.001374 | 0.003104 | 0.006538 | 0.006702 | 0.002952 | 0.002515 | 0.003878 | 0.005588 | 0.003784 | 0.003419 | 0.001672 |
| 8.80E-05 | 2.80E-05 | 5.42E-04 | 1.80E-04 | 6.81E-04 | 9.63E-04 | 8.68E-04 | 0.003573 | 3.80E-04 | 5.85E-04 | 4.81E-04 | 0.001204 | 8.27E-04 |
| 0.017494 | 0.035523 | 0.00703  | 0.00413  | 0.017924 | 0.007708 | 3.61E-04 | 0.011541 | 0.004721 | 0        | 0.002951 | 0.008464 | 0.001687 |
| 0.007111 | 0.003574 | 0.003651 | 0.003363 | 0.004303 | 0.003341 | 8.65E-04 | 0.003389 | 0.003454 | 0.004475 | 0.002642 | 0.00584  | 0.001528 |
| 0.002881 | 0.002037 | 0.010075 | 0.006224 | 0.006766 | 0.005634 | 0.025671 | 0.003037 | 0.005682 | 8.31E-04 | 0.003156 | 0.00409  | 0.011092 |
| 4.29E-04 | 9.16E-04 | 3.70E-04 | 0.001383 | 2.00E-04 | 0.002771 | 0.001433 | 4.34E-04 | 5.15E-04 | 0.001374 | 0.005675 | 0.003901 | 0.002209 |
| 0        | 2.90E-05 | 3.80E-05 | 0        | 0        | 0        | 6.90E-05 | 2.30E-05 | 0        | 4.00E-05 | 0        | 0        | 0        |
| 1.58E-04 | 4.23E-04 | 0.005534 | 0.001339 | 3.04E-04 | 4.90E-04 | 0.002464 | 6.28E-04 | 6.00E-04 | 0.007939 | 5.25E-04 | 0.001476 | 0.00127  |
| 3.49E-04 | 1.44E-04 | 4.83E-04 | 2.44E-04 | 3.30E-04 | 0.00149  | 6.27E-04 | 1.29E-04 | 2.00E-04 | 0.001989 | 4.73E-04 | 0.002369 | 8.70E-04 |
| 6.48E-04 | 0.001449 | 6.45E-04 | 5.45E-04 | 0        | 0.006492 | 0.007453 | 4.24E-04 | 5.90E-04 | 0.006339 | 5.92E-04 | 3.18E-04 | 2.27E-04 |
| 0        | 1.68E-04 | 1.02E-04 | 7.20E-05 | 5.30E-05 | 4.10E-05 | 1.79E-04 | 4.62E-04 | 0        | 1.07E-04 | 0        | 2.30E-05 | 5.40E-05 |
| 0        | 8.90E-05 | 0        | 0        | 5.10E-05 | 1.31E-04 | 1.11E-04 | 1.28E-04 | 0        | 4.71E-04 | 3.00E-05 | 3.40E-05 | 2.30E-05 |
| 3.13E-04 | 5.00E-05 | 1.24E-04 | 7.30E-05 | 7.20E-05 | 7.05E-04 | 6.90E-05 | 2.40E-05 | 1.34E-04 | 0        | 7.49E-04 | 2.56E-04 | 5.96E-04 |
| 1.23E-04 | 0.003439 | 0.00138  | 0.003437 | 6.73E-04 | 0.002021 | 0.001727 | 0.001128 | 0.006698 | 0.001341 | 1.64E-04 | 0.003849 | 2.05E-04 |
| 0.001058 | 0        | 0        | 1.12E-04 | 0        | 4.31E-04 | 2.02E-04 | 2.09E-04 | 7.80E-05 | 1.57E-04 | 3.93E-04 | 1.96E-04 | 0.001275 |
| 7.99E-04 | 3.99E-04 | 6.41E-04 | 9.01E-04 | 7.20E-05 | 9.72E-04 | 0.00117  | 3.60E-05 | 8.20E-05 | 0.004988 | 2.09E-04 | 7.38E-04 | 1.04E-04 |
| 2.70E-04 | 0        | 1.81E-04 | 2.09E-04 | 6.50E-05 | 2.16E-04 | 4.50E-05 | 7.64E-04 | 7.59E-04 | 1.73E-04 | 5.78E-04 | 6.56E-04 | 0.001188 |
| 6.30E-05 | 0        | 4.70E-05 | 0        | 0        | 5.80E-05 | 9.30E-05 | 3.90E-04 | 0        | 0        | 0        | 0        | 1.20E-04 |
| 3.85E-04 | 9.70E-05 | 3.10E-05 | 0        | 1.01E-04 | 2.40E-04 | 1.27E-04 | 1.75E-04 | 3.40E-05 | 5.46E-04 | 1.20E-04 | 9.80E-05 | 9.60E-05 |
| 2.50E-05 | 3.30E-05 | 2.00E-05 | 3.05E-04 | 0        | 1.84E-04 | 1.74E-04 | 2.05E-04 | 1.27E-04 | 0.002256 | 7.20E-05 | 6.70E-05 | 0.002004 |
| 8.80E-05 | 2.20E-05 | 0        | 2.04E-04 | 0        | 0        | 0        | 0        | 0        | 0        | 0        | 1.90E-05 | 4.72E-04 |
| 6.82E-04 | 8.19E-04 | 1.74E-04 | 5.67E-04 | 0        | 0.002407 | 0.001453 | 5.50E-05 | 0        | 0.011242 | 0.001024 | 0.001176 | 6.40E-05 |
| 2.07E-04 | 5.14E-04 | 6.94E-04 | 0.001881 | 0.004418 | 0.00164  | 0.003955 | 2.70E-05 | 6.60E-05 | 7.55E-04 | 3.09E-04 | 5.85E-04 | 2.73E-04 |
| 3.30E-05 | 0        | 0        | 0        | 7.50E-05 | 2.10E-05 | 2.70E-05 | 1.38E-04 | 0        | 3.40E-05 | 0        | 0        | 1.40E-05 |
| 3.80E-05 | 0        | 1.60E-05 | 0        | 3.62E-04 | 0        | 1.51E-04 | 2.04E-04 | 0        | 0        | 0        | 2.40E-05 | 6.00E-05 |
| 1.15E-04 | 1.12E-04 | 1.90E-05 | 7.70E-05 | 1.77E-04 | 5.91E-04 | 3.32E-04 | 1.33E-04 | 0        | 0.00295  | 1.77E-04 | 2.25E-04 | 0.006169 |
| 0        | 0        | 4.40E-05 | 0        | 3.00E-05 | 3.50E-05 | 1.99E-04 | 3.33E-04 | 5.70E-05 | 0        | 0        | 6.60E-05 | 8.30E-05 |

|          |          |          |          |          |          |          |          |          |          |          |          |          |
|----------|----------|----------|----------|----------|----------|----------|----------|----------|----------|----------|----------|----------|
| 1.22E-04 | 1.47E-04 | 0        | 8.80E-05 | 5.00E-05 | 3.89E-04 | 1.78E-04 | 2.10E-05 | 2.40E-05 | 4.86E-04 | 7.40E-05 | 2.70E-04 | 1.45E-04 |
| 0        | 0        | 3.30E-05 | 0        | 0        | 0        | 6.20E-05 | 4.08E-04 | 0        | 3.60E-05 | 0        | 3.10E-05 | 3.20E-05 |
| 0        | 0        | 1.20E-05 | 0        | 8.80E-05 | 2.50E-05 | 0.001364 | 1.73E-04 | 0        | 0        | 0        | 0        | 0        |
| 0        | 0        | 1.61E-04 | 3.60E-05 | 3.10E-05 | 4.31E-04 | 2.38E-04 | 9.40E-05 | 6.67E-04 | 0        | 0        | 2.80E-05 | 0.001322 |
| 0        | 3.60E-05 | 0        | 0        | 0        | 0        | 0.00816  | 0        | 0        | 0        | 3.60E-05 | 0        | 3.60E-05 |
| 5.60E-05 | 0        | 2.50E-05 | 0        | 0        | 2.45E-04 | 4.20E-05 | 5.00E-05 | 0        | 3.00E-05 | 6.30E-05 | 0        | 0        |
| 0        | 0        | 0        | 0        | 0        | 0        | 0        | 0        | 0        | 0        | 0        | 0        | 0        |
| 2.82E-04 | 1.54E-04 | 4.60E-05 | 0        | 0        | 5.10E-05 | 0        | 1.02E-04 | 3.13E-04 | 0        | 0        | 2.20E-05 | 0        |
| 3.10E-05 | 5.80E-05 | 2.30E-05 | 2.50E-05 | 0        | 2.32E-04 | 0        | 0        | 2.57E-04 | 7.00E-05 | 1.00E-04 | 1.41E-04 | 0        |
| 2.28E-04 | 9.40E-05 | 0        | 4.30E-05 | 6.10E-05 | 3.02E-04 | 0        | 0        | 1.58E-04 | 0        | 1.69E-04 | 7.30E-05 | 3.40E-05 |
| 2.00E-05 | 0        | 7.00E-05 | 0        | 3.50E-05 | 0        | 0        | 4.70E-05 | 0        | 7.00E-05 | 0        | 0        | 0        |
| 0        | 0        | 0        | 6.07E-04 | 0        | 0        | 0.001585 | 0        | 0        | 8.00E-05 | 0        | 0        | 2.20E-05 |
| 0.00109  | 0.001176 | 2.76E-04 | 1.36E-04 | 7.47E-04 | 0.001147 | 3.23E-04 | 1.96E-04 | 5.95E-04 | 1.45E-04 | 2.49E-04 | 7.39E-04 | 3.48E-04 |
| 0        | 0        | 0        | 0        | 0        | 0        | 0        | 0        | 0        | 0        | 0        | 0        | 0        |
| 0        | 0        | 0        | 0        | 0        | 0        | 0        | 1.00E-04 | 0        | 0        | 0        | 0        | 3.50E-05 |
| 0        | 3.70E-05 | 1.70E-05 | 0        | 0        | 2.30E-05 | 0        | 0        | 1.57E-04 | 0        | 2.75E-04 | 7.50E-05 | 7.40E-05 |
| 4.61E-04 | 6.90E-05 | 0        | 2.45E-04 | 5.59E-04 | 0.001678 | 0.001479 | 0        | 3.40E-05 | 2.11E-04 | 6.80E-05 | 4.40E-05 | 1.31E-04 |
| 0        | 0        | 0        | 0        | 0.018698 | 0.00212  | 0.002107 | 0.001552 | 1.08E-04 | 0        | 6.12E-04 | 1.10E-04 | 5.40E-05 |
| 0        | 0        | 0        | 0        | 0        | 0        | 6.00E-05 | 9.20E-05 | 0        | 0        | 0        | 0        | 2.50E-05 |
| 0        | 0        | 0        | 0        | 0        | 0        | 0        | 0        | 0        | 0        | 4.11E-04 | 2.67E-04 | 4.40E-05 |
| 0        | 0        | 0        | 0        | 0        | 0        | 0        | 0        | 0        | 0        | 0        | 0        | 0        |
| 0        | 0        | 2.30E-05 | 0        | 0        | 0        | 0        | 0        | 0        | 0        | 0        | 0        | 0        |
| 0        | 0        | 0        | 1.44E-04 | 0        | 0.001071 | 8.99E-04 | 0        | 0        | 0        | 0        | 0        | 0        |
| 0        | 0        | 0        | 0        | 0        | 0        | 0        | 0        | 0        | 0        | 0        | 0        | 0        |
| 0        | 0        | 0        | 0        | 0        | 2.90E-05 | 5.50E-05 | 2.00E-05 | 0        | 0        | 0        | 0        | 0        |
| 0        | 0        | 0        | 0        | 0        | 0        | 0        | 0        | 0        | 0        | 0        | 0        | 0        |
| 0        | 0        | 0        | 0        | 7.60E-05 | 0        | 0        | 6.90E-05 | 9.50E-05 | 9.80E-05 | 2.40E-05 | 1.70E-05 | 6.80E-05 |
| 0        | 0        | 0        | 0        | 0        | 0        | 8.70E-05 | 0        | 0        | 0        | 0        | 0        | 0        |
| 0        | 0        | 0        | 0        | 0        | 0        | 0        | 0        | 0        | 0        | 0        | 0        | 0        |
| 0        | 0        | 0        | 0        | 0        | 0        | 5.60E-05 | 0        | 3.90E-05 | 0        | 0        | 0        | 0        |
| 0.007684 | 0.008631 | 0.006626 | 0.006725 | 0.008972 | 0.016934 | 0.027326 | 0.012623 | 0.005889 | 0.024398 | 0.0073   | 0.006508 | 0.005595 |

| H085     | H080     | H125     | H081     | H043     | H060     | H026     | H014     | H071     | H078     | H129     | H095     | H011     |
|----------|----------|----------|----------|----------|----------|----------|----------|----------|----------|----------|----------|----------|
| 0.292458 | 0.289924 | 0.284382 | 0.282063 | 0.266184 | 0.263004 | 0.262723 | 0.259213 | 0.259086 | 0.257339 | 0.255344 | 0.254995 | 0.249129 |
| 0.00113  | 0.07052  | 0.00445  | 0.165193 | 0.073245 | 0.058207 | 0.06233  | 0.178545 | 0.047344 | 0.087203 | 0.105836 | 0.114886 | 0.026566 |
| 0.098545 | 0.105435 | 0.00602  | 0.063541 | 0.049203 | 0.048198 | 0.038655 | 0.014924 | 0.048214 | 0.036389 | 0.072717 | 0.031437 | 0.081014 |
| 0.151649 | 0.106495 | 0.063127 | 0.046085 | 0.098593 | 0.042083 | 0.063897 | 0.101264 | 0.080426 | 0.080806 | 0.112677 | 0.093925 | 0.114492 |
| 0.053986 | 0.015154 | 0.065586 | 0.015295 | 0.026115 | 0.035738 | 0.022107 | 0.17543  | 0.108656 | 0.050412 | 0.049483 | 0.035305 | 0.015786 |
| 0.016666 | 0.027951 | 0.004458 | 0.0948   | 0.097928 | 0.03298  | 0.058988 | 0.01514  | 0.038795 | 0.085383 | 0.069751 | 0.111274 | 0.019895 |
| 0.015363 | 0.073431 | 0.016465 | 0.037465 | 0.077957 | 0.178569 | 0.177223 | 0.044509 | 0.12286  | 0.09805  | 0.050406 | 0.050858 | 0.098389 |
| 0.008448 | 0.011762 | 0.001666 | 0.080618 | 0.054026 | 0.020336 | 0.011288 | 0.00252  | 0.035598 | 0.035676 | 0.038505 | 0.048482 | 0.014733 |
| 0.001883 | 0.077002 | 0.003843 | 0.06546  | 0.054139 | 0.042844 | 0.00902  | 0.010766 | 0.01331  | 0.032012 | 0.018022 | 0.047163 | 0.015138 |
| 0.069744 | 0.033545 | 0.013113 | 0.009177 | 0.021915 | 0.02545  | 0.017171 | 0.011812 | 0.009209 | 0.017229 | 0.035532 | 0.017001 | 0.0297   |
| 0.016006 | 0.008686 | 5.12E-04 | 0.034129 | 0.006463 | 0.013828 | 0.004933 | 0.020568 | 0.006868 | 0.003337 | 0.013975 | 0.0056   | 0.027858 |
| 0.00461  | 0.004064 | 7.10E-05 | 0.004634 | 0.024798 | 0.005869 | 0.011035 | 0.004275 | 0.003943 | 0.022156 | 0.012756 | 0.005327 | 0.006129 |
| 7.90E-04 | 0.008856 | 7.90E-05 | 0.006603 | 0.008032 | 0.001172 | 0.00434  | 2.13E-04 | 0.001522 | 0.004397 | 0.004516 | 0.003982 | 0.001399 |
| 0.009054 | 0.018885 | 0.007334 | 0.005892 | 0.012492 | 0.005831 | 0.007335 | 0.012746 | 0.017458 | 0.01534  | 0.015145 | 0.017365 | 0.001911 |
| 0.004527 | 0.010736 | 0.018493 | 0.001326 | 0.002671 | 0.003301 | 0.021643 | 0.03416  | 0.011893 | 0.029048 | 0.014513 | 0.01687  | 4.52E-04 |
| 9.04E-04 | 0.007195 | 5.95E-04 | 0.019894 | 0.017128 | 0.003954 | 0.003015 | 0.00245  | 0.001183 | 0.005965 | 0.004525 | 0.006607 | 0.007156 |
| 0.011951 | 0.007228 | 0.00222  | 0.004677 | 0.010136 | 0.016366 | 0.039195 | 0.030296 | 0.027103 | 0.010046 | 0.009636 | 0.012481 | 0.012827 |
| 1.39E-04 | 1.11E-04 | 0        | 3.72E-04 | 8.00E-05 | 5.09E-04 | 2.70E-05 | 0        | 3.00E-05 | 0        | 3.50E-05 | 6.60E-05 | 3.10E-04 |
| 0        | 0        | 7.20E-05 | 0        | 0        | 3.40E-05 | 0        | 0        | 2.47E-04 | 0        | 0        | 2.70E-05 | 3.69E-04 |
| 2.97E-04 | 0.05276  | 0        | 0.003532 | 0        | 0.002597 | 0.009738 | 0        | 0.01668  | 7.48E-04 | 6.43E-04 | 0.001128 | 0.006517 |
| 0        | 0.001451 | 0        | 0.002756 | 0.00439  | 8.61E-04 | 1.35E-04 | 9.70E-05 | 3.18E-04 | 3.68E-04 | 0.002094 | 4.32E-04 | 0.009793 |
| 7.16E-04 | 6.76E-04 | 2.21E-04 | 7.30E-04 | 0.001066 | 0.001172 | 0.011406 | 0.002031 | 0.026618 | 0.04426  | 0.005833 | 0.034333 | 3.18E-04 |
| 0.007557 | 0.004816 | 0.003812 | 0.004745 | 0.005637 | 0.005625 | 0.00313  | 0.007057 | 0.00591  | 0.006551 | 0.005023 | 0.00922  | 0.001505 |
| 7.66E-04 | 0.004621 | 0.001103 | 0.002929 | 0.007591 | 0.004172 | 0.003571 | 5.07E-04 | 0.004693 | 0.006516 | 0.004056 | 0.006236 | 0.001591 |
| 0.054883 | 0.008887 | 0.004234 | 1.98E-04 | 9.42E-04 | 0.002099 | 0.004504 | 0.019422 | 0.013254 | 0.009108 | 0.003621 | 0.006101 | 4.17E-04 |
| 1.50E-04 | 3.40E-05 | 0.113397 | 0.002417 | 1.63E-04 | 0.01712  | 0.003811 | 1.75E-04 | 0.002956 | 6.70E-05 | 2.92E-04 | 0.002288 | 0.022531 |
| 0.002639 | 0.00888  | 0.003949 | 0.001255 | 0.01085  | 0.002534 | 0.008678 | 0.004285 | 0.011833 | 0.00282  | 0.005316 | 0.0094   | 0.006854 |
| 0.024561 | 0.001263 | 0.003584 | 0.005454 | 0.007435 | 0.007437 | 0.003453 | 0.002333 | 0.004969 | 0.001575 | 0.006163 | 0.004307 | 6.07E-04 |
| 0.039815 | 0.006778 | 0.021133 | 2.25E-04 | 1.24E-04 | 0.007919 | 0.005329 | 0.008012 | 0.01813  | 0.001883 | 0.006952 | 0.001475 | 0.00691  |
| 0.002801 | 9.54E-04 | 0.005893 | 0.001125 | 8.11E-04 | 0.001592 | 0.01767  | 0.004732 | 0.004704 | 0.005181 | 0.003574 | 0.002716 | 0.001078 |
| 0.001583 | 0.001432 | 0.006077 | 0.008998 | 0.002252 | 0.012946 | 0.001965 | 3.70E-05 | 5.37E-04 | 1.34E-04 | 0.001366 | 3.54E-04 | 0.003943 |
| 6.98E-04 | 0        | 0.008797 | 0.001331 | 0.00108  | 0.003403 | 0.008221 | 0.0143   | 0.007955 | 0.006281 | 0.010852 | 0.011519 | 0        |
| 0.001564 | 0.002617 | 0.001899 | 4.77E-04 | 0.003255 | 0.001611 | 0.004218 | 9.04E-04 | 0.005933 | 0.002282 | 0.004974 | 0.005248 | 0.003755 |
| 0.010441 | 0.003219 | 0.002511 | 2.16E-04 | 0.003551 | 0.001059 | 0.008631 | 0.001785 | 0.003237 | 0.001738 | 0.006797 | 0.003097 | 0.005749 |
| 7.55E-04 | 0.002549 | 2.10E-04 | 0.001811 | 0.002647 | 0.006167 | 1.22E-04 | 3.20E-04 | 0.005466 | 0.00178  | 0.001652 | 2.90E-04 | 0.001189 |
| 0        | 0        | 0.005258 | 4.30E-05 | 2.00E-05 | 0.001122 | 0.020133 | 1.41E-04 | 0        | 0        | 0        | 2.90E-05 | 0.001453 |
| 0.002096 | 2.92E-04 | 1.47E-04 | 4.16E-04 | 6.84E-04 | 0.004968 | 0.002728 | 3.26E-04 | 0.001673 | 0.001089 | 0.003268 | 2.28E-04 | 0.001494 |
| 0.002393 | 5.48E-04 | 1.33E-04 | 0.001456 | 4.58E-04 | 7.29E-04 | 2.82E-04 | 7.70E-05 | 4.43E-04 | 4.00E-05 | 0.001697 | 1.89E-04 | 0.046873 |
| 0.003922 | 0.00314  | 0        | 3.59E-04 | 0.002429 | 0.006695 | 6.32E-04 | 3.90E-05 | 0.002097 | 0.002383 | 0.001939 | 0.002048 | 0.001299 |
| 1.61E-04 | 0        | 0.06355  | 0.001438 | 2.15E-04 | 0.010626 | 0.00138  | 1.26E-04 | 8.19E-04 | 4.20E-05 | 8.60E-05 | 0.001128 | 0.014614 |
| 1.00E-04 | 3.10E-05 | 0.015489 | 3.12E-04 | 1.36E-04 | 0.002844 | 0.008098 | 9.30E-05 | 3.11E-04 | 4.10E-05 | 1.39E-04 | 2.63E-04 | 0.003578 |
| 7.90E-05 | 5.57E-04 | 0        | 3.05E-04 | 5.23E-04 | 0        | 9.20E-05 | 2.29E-04 | 3.43E-04 | 0.009882 | 0.001328 | 1.42E-04 | 5.37E-04 |
| 2.08E-04 | 2.90E-05 | 7.90E-05 | 0.001817 | 4.21E-04 | 4.12E-04 | 3.35E-04 | 0.005403 | 0.002739 | 0.005428 | 5.52E-04 | 0.001136 | 2.04E-04 |
| 0        | 4.23E-04 | 0        | 2.85E-04 | 7.51E-04 | 0        | 5.10E-05 | 0        | 6.70E-05 | 5.96E-04 | 6.20E-04 | 0        | 4.09E-04 |
| 7.70E-04 | 8.48E-04 | 7.60E-05 | 2.49E-04 | 0.013914 | 0.002654 | 0.004522 | 1.73E-04 | 9.83E-04 | 3.18E-04 | 0.001687 | 0.004047 | 9.24E-04 |
| 0        | 0.001245 | 0        | 8.08E-04 | 0.002617 | 2.07E-04 | 7.22E-04 | 2.70E-04 | 2.31E-04 | 0.001919 | 6.16E-04 | 0.00253  | 0.001191 |
| 9.20E-05 | 0        | 0        | 6.51E-04 | 6.20E-05 | 0.008544 | 4.33E-04 | 0        | 0        | 0        | 3.00E-05 | 0        | 0.001353 |
| 1.69E-04 | 2.15E-04 | 8.60E-05 | 1.95E-04 | 0.00498  | 3.49E-04 | 7.23E-04 | 4.70E-05 | 3.00E-05 | 6.33E-04 | 0.001219 | 3.64E-04 | 0        |
| 0.002106 | 2.10E-04 | 0        | 4.40E-04 | 8.72E-04 | 0.001205 | 2.10E-05 | 7.40E-05 | 3.80E-05 | 1.11E-04 | 7.18E-04 | 1.43E-04 | 0.028526 |
| 0        | 1.50E-04 | 0        | 0        | 0.001189 | 0        | 1.80E-04 | 0        | 3.80E-05 | 4.20E-05 | 6.20E-04 | 0        | 7.65E-04 |
| 4.56E-04 | 4.44E-04 | 0        | 9.30E-05 | 0.001333 | 0.003278 | 1.80E-05 | 0        | 7.32E-04 | 7.64E-04 | 0.001378 | 4.51E-04 | 4.59E-04 |
| 0.009489 | 0.001329 | 0.002542 | 3.68E-04 | 5.30E-04 | 3.14E-04 | 1.48E-04 | 0        | 0.002555 | 2.37E-04 | 0.004381 | 2.89E-04 | 5.18E-04 |
| 0        | 0        | 0.010911 | 2.81E-04 | 0        | 0.001943 | 0.004429 | 0        | 3.56E-04 | 0        | 0        | 2.63E-04 | 0.002403 |
| 4.70E-05 | 4.20E-05 | 0.035161 | 7.31E-04 | 2.27E-04 | 0.004414 | 9.39E-04 | 4.70E-05 | 4.12E-04 | 0        | 9.10E-05 | 4.79E-04 | 0.00829  |
| 0.001275 | 4.20E-04 | 1.30E-04 | 6.72E-04 | 1.44E-04 | 7.69E-04 | 2.40E-05 | 3.70E-05 | 3.00E-04 | 8.40E-05 | 6.29E-04 | 1.33E-04 | 1.18E-04 |
| 1.28E-04 | 2.34E-04 | 0        | 5.41E-04 | 2.68E-04 | 0.007664 | 8.34E-04 | 0        | 3.40E-05 | 0        | 7.00E-05 | 2.70E-05 | 0.00163  |

|          |          |          |          |          |          |          |          |          |          |          |          |          |
|----------|----------|----------|----------|----------|----------|----------|----------|----------|----------|----------|----------|----------|
| 0        | 0        | 0        | 4.18E-04 | 4.70E-05 | 6.24E-04 | 8.00E-05 | 4.40E-05 | 1.47E-04 | 3.48E-04 | 2.56E-04 | 3.20E-05 | 4.72E-04 |
| 3.80E-05 | 3.90E-05 | 0        | 4.75E-04 | 1.12E-04 | 0.005723 | 4.89E-04 | 0        | 4.40E-05 | 0        | 0        | 0        | 0.002842 |
| 0.02846  | 0        | 0.01143  | 2.05E-04 | 2.80E-05 | 0.001379 | 3.31E-04 | 4.60E-05 | 3.51E-04 | 3.30E-05 | 0        | 8.10E-05 | 0.002465 |
| 5.80E-05 | 3.90E-05 | 0        | 7.13E-04 | 7.30E-05 | 0        | 0        | 0        | 3.30E-05 | 7.60E-05 | 6.76E-04 | 3.50E-05 | 0.001972 |
| 0.00443  | 2.86E-04 | 3.05E-04 | 3.70E-05 | 0        | 9.80E-05 | 0.001409 | 0        | 1.49E-04 | 0        | 0.001294 | 8.10E-05 | 1.16E-04 |
| 9.80E-05 | 1.63E-04 | 0.012105 | 3.15E-04 | 1.19E-04 | 0.002818 | 4.82E-04 | 0        | 7.80E-05 | 1.27E-04 | 1.26E-04 | 1.21E-04 | 0.003618 |
| 0        | 0        | 0        | 0        | 5.01E-04 | 0        | 0        | 4.60E-05 | 0        | 0        | 0.006028 | 0        | 0.022651 |
| 0        | 0        | 0        | 0        | 3.18E-04 | 0        | 7.80E-05 | 2.25E-04 | 2.69E-04 | 9.15E-04 | 1.57E-04 | 0.002002 | 0        |
| 0        | 4.20E-05 | 0        | 0        | 0        | 0        | 0        | 4.00E-05 | 0        | 1.18E-04 | 6.90E-05 | 0        | 0        |
| 0        | 0        | 0        | 0        | 0        | 0        | 0        | 0        | 3.50E-05 | 3.70E-04 | 1.33E-04 | 0        | 0        |
| 0        | 3.80E-05 | 0.013555 | 3.16E-04 | 2.50E-05 | 0.002193 | 3.07E-04 | 0        | 0        | 0        | 0        | 3.48E-04 | 0.003437 |
| 0.009071 | 0.001044 | 0        | 8.90E-05 | 0        | 0        | 0        | 0        | 3.51E-04 | 0        | 7.50E-05 | 0        | 1.37E-04 |
| 1.76E-04 | 1.51E-04 | 4.84E-04 | 7.30E-04 | 2.38E-04 | 7.04E-04 | 3.50E-04 | 0.001204 | 0.001103 | 8.80E-05 | 0.001094 | 3.45E-04 | 3.32E-04 |
| 0        | 0        | 0        | 0        | 0        | 0        | 0        | 0        | 0        | 0        | 0        | 0        | 0        |
| 0        | 3.40E-05 | 0.012991 | 3.55E-04 | 8.10E-05 | 0.001872 | 2.96E-04 | 4.30E-05 | 0        | 0        | 0        | 8.90E-05 | 0.002518 |
| 0        | 1.18E-04 | 0        | 0        | 0        | 0        | 0        | 0        | 0        | 3.06E-04 | 1.01E-04 | 0        | 0        |
| 0.001555 | 5.79E-04 | 5.18E-04 | 4.50E-05 | 9.50E-05 | 0        | 0        | 4.80E-05 | 0.00105  | 3.60E-05 | 6.87E-04 | 1.45E-04 | 6.70E-05 |
| 0.004959 | 7.60E-05 | 0.008333 | 0        | 0        | 0        | 0        | 2.13E-04 | 3.40E-05 | 1.51E-04 | 1.82E-04 | 0        | 5.20E-05 |
| 0        | 0        | 0.007965 | 3.17E-04 | 2.20E-05 | 0.001836 | 2.54E-04 | 0        | 0        | 0        | 0        | 1.23E-04 | 0.002227 |
| 0        | 0        | 0        | 0        | 0        | 0        | 0        | 6.50E-05 | 1.22E-04 | 1.01E-04 | 1.57E-04 | 0        | 0        |
| 0        | 0        | 0        | 0        | 0        | 0        | 0        | 0.001109 | 0        | 0        | 0        | 0        | 0        |
| 0        | 0        | 7.30E-05 | 0        | 0        | 0        | 0.006543 | 0        | 0        | 0        | 0        | 0        | 0        |
| 3.31E-04 | 1.18E-04 | 0        | 0        | 0.001107 | 0        | 0        | 0        | 4.10E-05 | 0        | 4.74E-04 | 0        | 0.001021 |
| 0        | 0        | 0        | 0        | 0        | 0        | 0        | 0        | 0        | 0        | 0        | 0        | 0        |
| 0        | 0        | 0.004623 | 7.80E-05 | 2.20E-05 | 0.001015 | 1.03E-04 | 0        | 6.10E-05 | 0        | 7.10E-05 | 1.24E-04 | 0.001575 |
| 0        | 0        | 0        | 0        | 0        | 0        | 0        | 0        | 0        | 0        | 0        | 0        | 0        |
| 6.10E-05 | 1.13E-04 | 0        | 3.97E-04 | 1.20E-05 | 4.78E-04 | 1.09E-04 | 0        | 0        | 3.90E-05 | 3.10E-05 | 3.00E-05 | 5.80E-05 |
| 0        | 0        | 0        | 1.61E-04 | 2.68E-04 | 0        | 0        | 0        | 0        | 0        | 1.52E-04 | 0        | 0        |
| 0        | 0        | 2.04E-04 | 0        | 0        | 0        | 1.90E-05 | 0        | 0        | 0        | 0        | 0        | 0        |
| 4.90E-05 | 3.42E-04 | 0        | 0        | 0        | 0        | 0        | 0        | 0        | 0        | 3.80E-05 | 0        | 6.80E-05 |
| 0.020144 | 0.008744 | 0.124546 | 0.008466 | 0.01226  | 0.045936 | 0.031745 | 0.006059 | 0.015014 | 0.011547 | 0.014706 | 0.01076  | 0.041724 |

| H112     | H141     | H090     | H040     | H135     | H126     | H039     | H116     | H117     | H057     | H013     | H050     | H106     |
|----------|----------|----------|----------|----------|----------|----------|----------|----------|----------|----------|----------|----------|
| 0.246103 | 0.244181 | 0.238892 | 0.234824 | 0.232238 | 0.22905  | 0.226091 | 0.221657 | 0.220061 | 0.218167 | 0.216031 | 0.215632 | 0.214676 |
| 0.105964 | 0.11106  | 0.228176 | 0.123267 | 0.167306 | 0.045635 | 0.012337 | 0.043784 | 0.052089 | 0.276002 | 0.332065 | 0.088127 | 0.162345 |
| 0.032272 | 0.082338 | 0.028598 | 0.057079 | 0.04105  | 0.075868 | 0.045829 | 0.010107 | 0.010317 | 0.045045 | 0.03362  | 0.107687 | 0.048257 |
| 0.03613  | 0.12956  | 0.088435 | 0.054427 | 0.162621 | 0.102327 | 0.100581 | 0.103881 | 0.120947 | 0.070904 | 0.058135 | 0.070541 | 0.044297 |
| 0.051361 | 0.06983  | 0.101317 | 0.072129 | 0.050197 | 0.026992 | 0.086297 | 0.12671  | 0.083354 | 0.034083 | 0.026334 | 0.016731 | 0.023239 |
| 0.046437 | 0.040062 | 0.009003 | 0.039441 | 0.04372  | 0.080748 | 0.165699 | 0.099428 | 0.211571 | 0.064981 | 0.099308 | 0.045092 | 0.090802 |
| 0.194513 | 0.031285 | 0.078934 | 0.121762 | 0.038351 | 0.075835 | 0.085709 | 0.085654 | 0.038338 | 0.017819 | 0.075464 | 0.091295 | 0.076445 |
| 0.025626 | 0.048668 | 0.001516 | 0.016749 | 0.022199 | 0.07629  | 0.06354  | 0.029302 | 0.008378 | 0.010854 | 0.032523 | 0.039503 | 0.120311 |
| 0.030426 | 0.037941 | 0.037613 | 0.037682 | 0.017184 | 0.03328  | 0.023877 | 0.012636 | 0.010715 | 0.034902 | 0.021829 | 0.065486 | 0.027802 |
| 0.027072 | 0.045731 | 0.020822 | 0.028976 | 0.038483 | 0.027718 | 0.019617 | 0.031374 | 0.051589 | 0.029614 | 0.010266 | 0.031202 | 0.014685 |
| 0.01273  | 0.030106 | 0.006612 | 0.011091 | 0.004687 | 0.006122 | 0.002649 | 0.002546 | 0.00212  | 0.022024 | 0.003399 | 0.036011 | 0.005934 |
| 0.01337  | 0.004292 | 0.008112 | 0.016306 | 0.012716 | 0.009951 | 0.012207 | 0.023773 | 0.022033 | 0.017578 | 8.87E-04 | 0.001279 | 0.016938 |
| 0.001366 | 0.003172 | 2.15E-04 | 0.004732 | 0.001057 | 0.00529  | 0.005497 | 0.003118 | 0.001082 | 0.002796 | 0.001492 | 0.020142 | 0.006741 |
| 0.017648 | 0.009165 | 0.008651 | 0.006128 | 0.025413 | 0.014105 | 0.015442 | 0.019742 | 0.030311 | 0.010569 | 0.009932 | 0.004018 | 0.004125 |
| 0.01041  | 0.001553 | 0.028758 | 0.025507 | 0.014231 | 0.006059 | 0.009515 | 0.026979 | 0.008079 | 0.007933 | 0.002717 | 0.010253 | 0.010388 |
| 0.00341  | 0.010951 | 0.002766 | 0.005196 | 0.002474 | 0.005569 | 0.006237 | 0.002043 | 0.001668 | 0.005051 | 0.004137 | 0.005534 | 0.006523 |
| 0.019152 | 0.003831 | 0.01842  | 0.007409 | 0.015724 | 0.010383 | 0.007313 | 0.007546 | 0.015971 | 0.033236 | 0.00455  | 0.007441 | 0.01767  |
| 8.20E-05 | 1.71E-04 | 0        | 3.60E-04 | 0        | 1.74E-04 | 0        | 1.60E-05 | 2.60E-05 | 7.50E-05 | 0        | 1.86E-04 | 4.80E-05 |
| 0        | 0        | 0        | 0        | 0        | 0        | 0        | 0        | 0        | 0        | 4.99E-04 | 0        | 0        |
| 0.002545 | 0.00138  | 0.012762 | 0.016965 | 4.17E-04 | 0.001335 | 1.83E-04 | 2.40E-05 | 1.47E-04 | 0.002289 | 0.001461 | 3.72E-04 | 5.90E-05 |
| 4.52E-04 | 0.002591 | 4.03E-04 | 0.002368 | 2.05E-04 | 7.66E-04 | 3.47E-04 | 7.30E-05 | 4.30E-04 | 0.002121 | 4.60E-05 | 0.009083 | 0.001935 |
| 0.020349 | 1.84E-04 | 0        | 0.003499 | 0.022281 | 0.010886 | 2.51E-04 | 0.002014 | 0.001278 | 0.023169 | 0.003044 | 1.29E-04 | 0.00743  |
| 0.004338 | 0.013768 | 0.003817 | 0.004841 | 0.004342 | 0.00406  | 0.007699 | 0.007851 | 0.009289 | 0.005375 | 0.003144 | 0.004509 | 0.002617 |
| 0.002586 | 0.005305 | 0.001167 | 0.001622 | 8.98E-04 | 0.004838 | 0.005699 | 0.006167 | 0.005395 | 0.005166 | 0.003325 | 0.001931 | 0.005939 |
| 0.01141  | 0.002576 | 0.020028 | 0.010588 | 0.008066 | 0.002106 | 0.005162 | 0.012488 | 0.01032  | 0.006242 | 0.001251 | 0.001183 | 0.002112 |
| 5.17E-04 | 4.00E-05 | 1.05E-04 | 2.78E-04 | 5.00E-05 | 3.78E-04 | 5.50E-05 | 8.30E-05 | 2.90E-05 | 4.78E-04 | 0        | 1.83E-04 | 0.001126 |
| 0.004946 | 0.004678 | 0.001381 | 0.004967 | 0.00247  | 0.006974 | 0.002029 | 0.00761  | 0.001668 | 0.005765 | 0.003102 | 0.004666 | 0.010106 |
| 0.00423  | 0.005016 | 4.72E-04 | 0.001996 | 0.012178 | 0.002725 | 0.041665 | 0.010681 | 0.018254 | 0.002072 | 0.006101 | 0.001843 | 0.003442 |
| 0.006825 | 0.003444 | 0.002962 | 0.021133 | 0.006248 | 0.00115  | 0.008312 | 0.003713 | 0.022649 | 0.003133 | 0.010428 | 0.018026 | 0.001871 |
| 0.002243 | 8.12E-04 | 0        | 0.004416 | 0.004723 | 0.005503 | 0.011383 | 0.008684 | 0.002522 | 0.007644 | 0.003693 | 0.001873 | 0.006643 |
| 0.001556 | 0.002431 | 1.36E-04 | 0.003858 | 3.26E-04 | 0.002504 | 1.83E-04 | 3.36E-04 | 2.83E-04 | 7.55E-04 | 0        | 0.001016 | 0.002846 |
| 0.009402 | 0.010025 | 0.022219 | 0.002747 | 0.012843 | 0.005068 | 0.005028 | 0.053952 | 0        | 0        | 0.001283 | 0.00191  | 0.002259 |
| 0.003136 | 0.003548 | 0.001599 | 0.002604 | 0.001841 | 0.006101 | 0.001837 | 0.004806 | 0.008542 | 0.002552 | 0.005876 | 0.004987 | 0.003237 |
| 0.003203 | 0.002696 | 0.001247 | 0.004898 | 0.003195 | 0.004565 | 0.001404 | 0.003955 | 0.002805 | 0.001583 | 0.002132 | 0.006575 | 0.002119 |
| 0.010466 | 9.43E-04 | 0.012657 | 0.009481 | 0.00579  | 0.006186 | 8.75E-04 | 6.08E-04 | 0.003332 | 5.73E-04 | 5.67E-04 | 0.008467 | 0.003324 |
| 0        | 0        | 0        | 7.70E-05 | 0        | 0        | 1.18E-04 | 0        | 0        | 2.30E-05 | 5.10E-05 | 1.20E-05 | 8.20E-05 |
| 0.007545 | 0.001223 | 4.30E-05 | 8.24E-04 | 6.86E-04 | 0.003335 | 0.003599 | 0.005885 | 0.008915 | 0.004134 | 0.004972 | 0.00256  | 0.005474 |
| 0.002095 | 0.011086 | 8.78E-04 | 0.002663 | 0.010275 | 7.05E-04 | 4.67E-04 | 1.97E-04 | 3.34E-04 | 0.001444 | 8.10E-05 | 0.004446 | 8.52E-04 |
| 0.001331 | 9.05E-04 | 1.91E-04 | 8.90E-04 | 2.33E-04 | 0.039131 | 9.01E-04 | 9.39E-04 | 0.001047 | 3.91E-04 | 6.83E-04 | 0.011048 | 0.009038 |
| 3.34E-04 | 0        | 0        | 2.15E-04 | 0        | 2.51E-04 | 6.30E-05 | 1.18E-04 | 8.80E-05 | 2.39E-04 | 0        | 1.67E-04 | 3.08E-04 |
| 8.90E-05 | 8.80E-05 | 0        | 9.90E-05 | 0        | 2.54E-04 | 6.30E-05 | 1.47E-04 | 2.13E-04 | 1.18E-04 | 8.60E-05 | 5.23E-04 | 1.31E-04 |
| 2.09E-04 | 3.12E-04 | 6.44E-04 | 0.002647 | 5.99E-04 | 2.26E-04 | 2.56E-04 | 1.52E-04 | 0.001856 | 9.97E-04 | 4.80E-05 | 4.57E-04 | 2.13E-04 |
| 0.002783 | 0.002487 | 1.06E-04 | 0.00216  | 5.35E-04 | 0.001177 | 3.70E-05 | 2.62E-04 | 2.90E-05 | 4.25E-04 | 2.94E-04 | 6.61E-04 | 0.001177 |
| 0        | 3.19E-04 | 0        | 1.86E-04 | 1.91E-04 | 9.63E-04 | 2.07E-04 | 2.30E-05 | 3.30E-05 | 1.87E-04 | 0.001    | 0.001634 | 9.39E-04 |
| 0.001016 | 3.29E-04 | 0        | 0.001659 | 0.00177  | 0.005766 | 4.23E-04 | 3.58E-04 | 2.27E-04 | 0.001203 | 0.002443 | 0.004102 | 0.001092 |
| 8.78E-04 | 3.60E-04 | 1.81E-04 | 0.002249 | 2.47E-04 | 0.002345 | 5.47E-04 | 8.54E-04 | 8.61E-04 | 0.002862 | 2.30E-04 | 5.53E-04 | 0.001355 |
| 2.52E-04 | 3.90E-05 | 0        | 2.02E-04 | 0        | 2.17E-04 | 0        | 1.40E-05 | 3.00E-05 | 1.16E-04 | 0        | 1.83E-04 | 1.55E-04 |
| 7.76E-04 | 2.06E-04 | 1.02E-04 | 4.31E-04 | 1.82E-04 | 0.004038 | 1.98E-04 | 0.00164  | 7.40E-04 | 1.54E-04 | 1.05E-04 | 4.33E-04 | 0.001718 |
| 0.001624 | 0.00718  | 4.50E-05 | 2.52E-04 | 7.90E-05 | 8.07E-04 | 5.34E-04 | 5.94E-04 | 9.40E-05 | 1.95E-04 | 4.70E-05 | 0.001841 | 1.04E-04 |
| 2.20E-05 | 4.50E-05 | 0        | 1.04E-04 | 1.19E-04 | 8.60E-05 | 0        | 0        | 0        | 1.63E-04 | 0        | 4.25E-04 | 2.33E-04 |
| 4.45E-04 | 2.94E-04 | 9.00E-05 | 0.001455 | 4.20E-05 | 0.004833 | 5.90E-04 | 5.50E-04 | 4.63E-04 | 3.04E-04 | 0.001734 | 0.003146 | 0.004182 |
| 0.005688 | 5.70E-04 | 0        | 0.004028 | 3.70E-05 | 8.80E-04 | 9.47E-04 | 7.35E-04 | 3.34E-04 | 7.96E-04 | 3.36E-04 | 0.00178  | 0.001504 |
| 5.60E-05 | 0        | 0        | 7.50E-05 | 0        | 2.50E-05 | 0        | 0        | 0        | 5.40E-05 | 0        | 0        | 4.80E-05 |
| 9.80E-05 | 0        | 0        | 1.03E-04 | 0        | 2.30E-05 | 0        | 1.70E-05 | 5.60E-05 | 1.87E-04 | 0        | 0        | 2.65E-04 |
| 3.00E-05 | 4.78E-04 | 1.69E-04 | 7.82E-04 | 0.003354 | 4.47E-04 | 2.54E-04 | 6.00E-05 | 2.66E-04 | 1.41E-04 | 0        | 6.84E-04 | 4.93E-04 |
| 6.50E-05 | 7.20E-05 | 0        | 1.83E-04 | 0        | 1.45E-04 | 3.10E-05 | 0        | 0        | 1.80E-04 | 4.10E-05 | 0        | 1.22E-04 |

|          |          |          |          |          |          |          |          |          |          |          |          |          |
|----------|----------|----------|----------|----------|----------|----------|----------|----------|----------|----------|----------|----------|
| 8.94E-04 | 3.24E-04 | 1.99E-04 | 4.63E-04 | 0        | 2.53E-04 | 6.60E-05 | 3.66E-04 | 1.27E-04 | 6.80E-05 | 2.84E-04 | 1.27E-04 | 0.001288 |
| 1.28E-04 | 4.10E-05 | 0        | 0        | 0        | 9.80E-05 | 0        | 0        | 0        | 8.50E-05 | 0        | 6.10E-05 | 1.60E-04 |
| 3.10E-05 | 0        | 4.60E-05 | 1.39E-04 | 0        | 2.20E-05 | 0        | 8.10E-05 | 0        | 2.70E-04 | 0        | 3.50E-05 | 1.01E-04 |
| 0        | 4.30E-04 | 4.70E-05 | 1.43E-04 | 7.58E-04 | 0        | 9.20E-05 | 2.00E-05 | 2.90E-05 | 4.90E-05 | 0        | 1.53E-04 | 2.20E-05 |
| 0        | 0        | 0        | 3.20E-05 | 0        | 3.00E-05 | 0        | 0        | 0        | 9.30E-05 | 0        | 6.10E-05 | 0        |
| 2.50E-05 | 1.60E-05 | 1.59E-04 | 6.50E-05 | 0        | 0.00103  | 1.18E-04 | 0        | 2.40E-05 | 4.00E-05 | 0        | 2.55E-04 | 2.81E-04 |
| 0        | 0        | 0        | 0        | 0        | 1.18E-04 | 0        | 2.10E-05 | 0        | 0        | 0        | 0        | 0        |
| 1.69E-04 | 0.001079 | 0        | 2.99E-04 | 8.40E-05 | 6.36E-04 | 0        | 9.56E-04 | 0.001078 | 0        | 3.85E-04 | 2.10E-05 | 5.42E-04 |
| 0        | 1.39E-04 | 3.90E-05 | 0        | 0        | 0        | 7.20E-05 | 2.00E-05 | 0        | 0        | 3.60E-05 | 0        | 0        |
| 0        | 1.76E-04 | 7.70E-05 | 0        | 8.80E-05 | 0        | 4.70E-05 | 3.00E-05 | 3.20E-05 | 0        | 1.64E-04 | 0        | 0        |
| 0        | 0        | 0        | 3.80E-05 | 0        | 1.80E-05 | 0        | 1.70E-05 | 0        | 7.10E-05 | 0        | 1.10E-05 | 1.50E-04 |
| 0        | 0        | 0        | 0        | 0        | 2.00E-05 | 8.80E-05 | 2.61E-04 | 0        | 2.99E-04 | 0        | 1.37E-04 | 0        |
| 3.56E-04 | 3.91E-04 | 0.003425 | 6.10E-04 | 8.10E-04 | 2.64E-04 | 1.50E-04 | 8.83E-04 | 2.35E-04 | 0.002335 | 1.30E-04 | 5.35E-04 | 9.80E-05 |
| 0        | 0        | 0        | 0        | 0        | 0        | 0        | 0        | 0        | 0        | 0        | 0        | 0        |
| 2.80E-05 | 0        | 0        | 0        | 0        | 0        | 0        | 0        | 0        | 0        | 0        | 0        | 1.10E-04 |
| 0        | 5.10E-05 | 9.00E-05 | 0        | 0        | 0        | 5.10E-05 | 0        | 0        | 0        | 5.05E-04 | 2.20E-05 | 0        |
| 1.06E-04 | 1.41E-04 | 0        | 3.80E-05 | 0        | 5.40E-04 | 5.65E-04 | 5.13E-04 | 0        | 9.10E-05 | 0        | 1.45E-04 | 0        |
| 0        | 6.20E-05 | 1.01E-04 | 0.001512 | 1.14E-04 | 5.00E-05 | 1.16E-04 | 1.44E-04 | 0        | 2.00E-05 | 0        | 0.001152 | 5.30E-05 |
| 0        | 0        | 0        | 7.90E-05 | 0        | 2.36E-04 | 0        | 1.60E-05 | 0        | 2.50E-05 | 0        | 0        | 3.70E-05 |
| 1.05E-04 | 0        | 1.58E-04 | 0        | 0        | 5.90E-04 | 0        | 0        | 0        | 4.85E-04 | 0        | 0        | 3.73E-04 |
| 0        | 0        | 0        | 0        | 0        | 0        | 0        | 0        | 0        | 0        | 0        | 0        | 0        |
| 0        | 0        | 0        | 0        | 0        | 0        | 7.80E-05 | 0        | 0        | 0        | 0        | 0        | 0        |
| 1.23E-04 | 0        | 0        | 0        | 0        | 2.30E-05 | 0        | 0        | 0        | 1.23E-04 | 2.21E-04 | 0.013719 | 6.27E-04 |
| 0        | 0        | 0        | 0        | 0        | 0        | 0        | 0        | 0        | 0        | 0        | 0        | 0        |
| 3.30E-05 | 0        | 0        | 3.60E-05 | 0        | 2.30E-05 | 2.60E-05 | 0        | 0        | 7.40E-05 | 0        | 0        | 3.70E-05 |
| 0        | 0        | 0        | 0        | 0        | 0        | 0        | 0        | 0        | 0        | 0        | 0        | 0        |
| 2.50E-05 | 0        | 3.90E-05 | 2.25E-04 | 0        | 0        | 0        | 0        | 0        | 0        | 0        | 0        | 1.80E-05 |
| 0        | 0        | 0        | 0        | 0        | 5.50E-05 | 0        | 0        | 0        | 0        | 0        | 1.79E-04 | 0        |
| 0        | 0        | 0        | 0        | 0        | 0        | 0        | 0        | 0        | 0        | 0        | 0        | 0        |
| 0        | 0        | 0        | 0        | 0        | 0        | 0        | 0        | 0        | 0        | 3.60E-05 | 5.10E-05 | 0        |
| 0.010365 | 0.007823 | 0.005376 | 0.015711 | 0.004273 | 0.033799 | 0.008747 | 0.010786 | 0.007297 | 0.011009 | 0.007447 | 0.025768 | 0.018327 |



| H034     | H150     | H030     | H091     | H053     | H115     | H021     | H105     | H023     | H146     | H010     | H076     | H058     |
|----------|----------|----------|----------|----------|----------|----------|----------|----------|----------|----------|----------|----------|
| 0.214486 | 0.214012 | 0.209473 | 0.206035 | 0.205858 | 0.205661 | 0.203333 | 0.196352 | 0.196037 | 0.194206 | 0.19206  | 0.19025  | 0.189019 |
| 0.132045 | 0.266065 | 0.030587 | 0.044864 | 0.02148  | 0.094741 | 0.09777  | 0.049038 | 0.172836 | 0.119322 | 0.155496 | 0.085654 | 0.057025 |
| 0.034083 | 0.08177  | 0.079173 | 0.079643 | 0.011427 | 0.064071 | 0.064517 | 0.070554 | 0.050403 | 0.022034 | 0.121161 | 0.009318 | 0.032899 |
| 0.065379 | 0.088876 | 0.094959 | 0.191162 | 0.005423 | 0.111965 | 0.063936 | 0.041894 | 0.060925 | 0.010249 | 0.043033 | 0.054841 | 0.031826 |
| 0.031348 | 0.016453 | 0.051847 | 0.038179 | 0.002043 | 0.145842 | 0.034436 | 0.012416 | 0.019044 | 0.020002 | 0.009388 | 0.276493 | 0.03885  |
| 0.017436 | 0.042358 | 0.041373 | 0.044063 | 9.60E-04 | 0.07196  | 0.10635  | 0.064373 | 0.075143 | 0.175879 | 0.0414   | 0.063595 | 0.038292 |
| 0.029245 | 0.063292 | 0.086658 | 0.064455 | 0.002251 | 0.011672 | 0.049172 | 0.114774 | 0.085049 | 0.010045 | 0.115904 | 0.076551 | 0.018382 |
| 0.007227 | 0.036042 | 0.033475 | 0.039373 | 0.006343 | 0.011387 | 0.096733 | 0.027714 | 0.069649 | 0.200019 | 0.022708 | 0.01988  | 0.023585 |
| 0.033577 | 0.02469  | 0.036144 | 0.021661 | 0.004451 | 0.073307 | 0.010359 | 0.122836 | 0.039123 | 0.005327 | 0.040921 | 0.014845 | 0.016426 |
| 0.02916  | 0.030653 | 0.022006 | 0.051428 | 5.91E-04 | 0.016194 | 0.017486 | 0.010365 | 0.00913  | 0.010897 | 0.020763 | 0.014995 | 0.022492 |
| 0.005246 | 0.022854 | 0.015284 | 0.002518 | 3.51E-04 | 0.03037  | 0.008979 | 0.014313 | 0.013226 | 0.033181 | 0.027906 | 0.003653 | 0.011311 |
| 0.002349 | 0.004875 | 0.00292  | 0.013512 | 3.54E-04 | 0.019867 | 0.014639 | 0.007649 | 0.013658 | 0.049103 | 0.003299 | 0.007713 | 0.00433  |
| 0.001992 | 0.002419 | 0.003898 | 0.004763 | 3.46E-04 | 0.005428 | 0.007217 | 0.024353 | 0.006898 | 4.19E-04 | 0.00603  | 0.001142 | 0        |
| 0.009886 | 0.007912 | 0.007374 | 0.004207 | 1.18E-04 | 0.02661  | 0.007433 | 6.73E-04 | 0.006933 | 0.019031 | 0.002627 | 0.015542 | 0.002984 |
| 0.066058 | 0.00745  | 0.014416 | 0.005515 | 3.44E-04 | 0.008184 | 0.01144  | 0.00386  | 0.005508 | 0.018126 | 0.009452 | 0.004792 | 0.004339 |
| 0.005873 | 0.019967 | 0.002858 | 0.004507 | 0        | 0.011622 | 0.003859 | 0.006679 | 0.00679  | 0.002522 | 0.009714 | 0.001534 | 0.008364 |
| 0.006    | 0.006057 | 0.009429 | 0.018693 | 0        | 0.004057 | 0.019726 | 0.006921 | 0.008928 | 0.008483 | 0.007806 | 0.025082 | 0.006758 |
| 0        | 0        | 2.80E-05 | 5.86E-04 | 0        | 5.10E-05 | 2.39E-04 | 0.00121  | 0        | 0        | 0.001368 | 0        | 0        |
| 0        | 0        | 0        | 0        | 0        | 0        | 1.90E-05 | 6.33E-04 | 0.079584 | 0.002258 | 1.02E-04 | 0        | 0        |
| 9.61E-04 | 0        | 7.79E-04 | 0        | 0        | 0.001505 | 0.003686 | 0.016007 | 0.007833 | 3.00E-05 | 0        | 9.87E-04 | 0        |
| 4.32E-04 | 1.85E-04 | 0.001901 | 0.003038 | 0        | 4.00E-05 | 0.001447 | 0.005591 | 0.00298  | 0.001145 | 0.001842 | 9.90E-05 | 3.88E-04 |
| 0.009064 | 0.0078   | 0.003337 | 0.001632 | 0.001603 | 2.35E-04 | 0.004446 | 6.79E-04 | 0.009294 | 0.030073 | 0.001617 | 0.023667 | 0.003117 |
| 0.00458  | 0.004962 | 0.004378 | 0.003179 | 0        | 0.007561 | 0.005886 | 0.001574 | 0.003399 | 0.005232 | 0.002793 | 0.007989 | 0.004555 |
| 0.001546 | 0.002337 | 7.30E-04 | 0.003185 | 0        | 0.00111  | 0.003947 | 0.00388  | 0.002636 | 0.006328 | 0.004001 | 9.50E-04 | 0.0018   |
| 0.002334 | 0.001597 | 0.008432 | 0.00617  | 2.25E-04 | 0.005798 | 0.001845 | 4.97E-04 | 5.95E-04 | 0.003987 | 8.78E-04 | 0.01615  | 0.001997 |
| 0.00563  | 0        | 0.002287 | 0.002983 | 0.148804 | 1.17E-04 | 2.71E-04 | 0.018295 | 3.80E-05 | 0.002702 | 0.020211 | 5.00E-05 | 0.099022 |
| 0.003954 | 0.006555 | 0.003583 | 0.004448 | 0        | 0.005468 | 0.00586  | 8.40E-04 | 0.00385  | 0.002426 | 0.003354 | 0.007248 | 0.00186  |
| 0.003886 | 0.006144 | 0.003506 | 0.001464 | 0.002017 | 0.016346 | 0.004822 | 5.01E-04 | 9.81E-04 | 1.48E-04 | 1.44E-04 | 0.005413 | 0.004479 |
| 0.005369 | 0.003579 | 0.017891 | 0.002589 | 8.00E-04 | 0.012752 | 0.00359  | 1.89E-04 | 0.003045 | 2.60E-05 | 0.001522 | 0.013867 | 0.00185  |
| 0.012988 | 0.001576 | 0.004897 | 6.04E-04 | 0.004563 | 0.009489 | 0.003326 | 0.001119 | 0.001807 | 0.001956 | 0.0011   | 0.002948 | 0.003856 |
| 1.37E-04 | 3.07E-04 | 7.89E-04 | 0.010904 | 0.016922 | 0        | 0.001741 | 0.045022 | 4.40E-04 | 2.43E-04 | 0.035404 | 3.66E-04 | 0.011082 |
| 0.009085 | 0.00339  | 0.006198 | 9.05E-04 | 1.17E-04 | 0.011674 | 1.93E-04 | 0        | 0.00156  | 0.001263 | 0.001202 | 0.020095 | 6.78E-04 |
| 0.002041 | 0.002871 | 0.002225 | 9.44E-04 | 1.21E-04 | 0.002256 | 0.002046 | 0.002287 | 0.002775 | 0.008241 | 0.002996 | 0.001743 | 0.001277 |
| 0.003122 | 0.002692 | 0.00205  | 0.004268 | 0        | 0.002072 | 0.004203 | 0.001304 | 0.001812 | 0        | 0.001362 | 0.001959 | 2.87E-04 |
| 0.001816 | 3.23E-04 | 0.017392 | 0.003381 | 1.04E-04 | 1.34E-04 | 0.007791 | 0.006127 | 0.008952 | 7.66E-04 | 3.57E-04 | 0.003465 | 0.002525 |
| 0.038128 | 0        | 0.045375 | 2.78E-04 | 0.017037 | 0        | 1.90E-05 | 0.001189 | 0        | 1.84E-04 | 0.001242 | 2.00E-05 | 0.005103 |
| 7.25E-04 | 6.75E-04 | 0.003048 | 0.002632 | 0        | 5.60E-05 | 0.004349 | 1.60E-04 | 6.14E-04 | 0.00193  | 3.81E-04 | 0.006005 | 0.004655 |
| 3.61E-04 | 5.20E-05 | 0.002272 | 0.004908 | 0        | 8.90E-05 | 0.018666 | 5.91E-04 | 6.66E-04 | 3.96E-04 | 7.51E-04 | 2.83E-04 | 0.001012 |
| 9.67E-04 | 2.00E-04 | 0.003896 | 0.006165 | 0        | 4.30E-05 | 0.009006 | 0.006804 | 0.001527 | 0        | 2.01E-04 | 8.01E-04 | 0.003768 |
| 5.10E-05 | 0        | 5.60E-05 | 0.001957 | 0.088513 | 2.47E-04 | 1.24E-04 | 0.013961 | 1.09E-04 | 0.001845 | 0.012247 | 2.50E-05 | 0.060029 |
| 0.049579 | 3.80E-05 | 0.010051 | 2.91E-04 | 0.02359  | 3.64E-04 | 3.10E-04 | 0.003012 | 7.00E-05 | 2.59E-04 | 0.002749 | 5.30E-05 | 0.012499 |
| 3.00E-04 | 1.22E-04 | 5.01E-04 | 5.46E-04 | 0        | 3.60E-05 | 6.78E-04 | 0.001016 | 5.67E-04 | 4.28E-04 | 7.70E-05 | 6.97E-04 | 0        |
| 0.004411 | 0.009337 | 0.002913 | 0.002146 | 0        | 0.002244 | 0.001139 | 0        | 0.001434 | 0.012279 | 0.003629 | 0.002219 | 0        |
| 3.23E-04 | 1.48E-04 | 7.60E-04 | 8.10E-05 | 0        | 0        | 7.53E-04 | 0.00109  | 0.004306 | 0        | 0        | 1.00E-04 | 0.001383 |
| 2.52E-04 | 2.60E-04 | 0.001152 | 0.004748 | 0        | 9.40E-05 | 0.003748 | 0.001542 | 0.003147 | 4.50E-05 | 0.001434 | 0.001375 | 0        |
| 7.65E-04 | 1.59E-04 | 7.96E-04 | 0.001714 | 0        | 0.00168  | 5.12E-04 | 0.004805 | 0.002315 | 0.00108  | 3.49E-04 | 5.45E-04 | 0        |
| 0        | 0        | 2.00E-05 | 9.42E-04 | 0.049922 | 0        | 2.80E-05 | 0.006679 | 3.40E-05 | 0        | 0.001637 | 1.50E-05 | 0.023548 |
| 6.70E-05 | 6.10E-05 | 2.13E-04 | 4.10E-04 | 1.21E-04 | 0        | 0.003689 | 9.76E-04 | 6.02E-04 | 6.60E-05 | 6.00E-05 | 0.002407 | 9.99E-04 |
| 0        | 0        | 0.034395 | 0.012665 | 0        | 0        | 2.45E-04 | 3.30E-05 | 1.12E-04 | 0        | 9.41E-04 | 0.001607 | 0.004885 |
| 8.50E-05 | 0        | 2.40E-05 | 0        | 0        | 0        | 1.75E-04 | 0        | 8.61E-04 | 0        | 0        | 0        | 0        |
| 4.01E-04 | 6.30E-05 | 0.001874 | 0.001416 | 0        | 0        | 0.014249 | 0.001002 | 0.00112  | 0        | 1.10E-04 | 3.43E-04 | 9.90E-05 |
| 9.20E-05 | 1.22E-04 | 0.00104  | 0.005828 | 6.83E-04 | 1.27E-04 | 0.003499 | 6.89E-04 | 7.13E-04 | 0        | 6.24E-04 | 6.42E-04 | 0.001273 |
| 0.022804 | 0        | 0.007834 | 2.80E-04 | 0.013947 | 0        | 5.20E-05 | 0.002599 | 0        | 4.48E-04 | 0.001929 | 2.20E-05 | 0.00804  |
| 3.10E-05 | 0        | 8.30E-05 | 9.81E-04 | 0.039963 | 0        | 3.80E-05 | 0.00535  | 3.90E-05 | 7.74E-04 | 0.005917 | 0        | 0.021459 |
| 2.77E-04 | 3.50E-05 | 4.45E-04 | 0.022928 | 0        | 0        | 0.001376 | 3.44E-04 | 6.29E-04 | 2.54E-04 | 0        | 1.12E-04 | 0.001568 |
| 3.40E-05 | 6.40E-05 | 6.90E-05 | 7.39E-04 | 0.02436  | 0        | 2.14E-04 | 0.00606  | 7.60E-05 | 0        | 0.00368  | 2.60E-05 | 0.00687  |

|          |          |          |          |          |          |          |          |          |          |          |          |          |
|----------|----------|----------|----------|----------|----------|----------|----------|----------|----------|----------|----------|----------|
| 1.39E-04 | 4.80E-05 | 2.31E-04 | 0.005684 | 0        | 0        | 9.98E-04 | 0.001547 | 3.10E-05 | 1.76E-04 | 0.001338 | 0.00197  | 0        |
| 0        | 0        | 0        | 4.44E-04 | 0.028562 | 0        | 1.70E-05 | 0.006051 | 0        | 0        | 9.87E-04 | 2.60E-05 | 0.021061 |
| 0        | 0        | 7.90E-05 | 0.001008 | 0.015956 | 5.40E-05 | 2.40E-05 | 0.002392 | 8.10E-05 | 2.69E-04 | 0.001523 | 2.00E-05 | 0.009896 |
| 0        | 9.40E-05 | 2.08E-04 | 0.002735 | 0        | 0        | 4.30E-05 | 0        | 0        | 0        | 8.09E-04 | 2.00E-05 | 1.01E-04 |
| 0.003874 | 0        | 0.001157 | 1.79E-04 | 4.51E-04 | 0        | 2.90E-05 | 1.21E-04 | 4.20E-05 | 2.40E-05 | 2.11E-04 | 2.10E-05 | 4.01E-04 |
| 3.48E-04 | 0        | 3.35E-04 | 3.47E-04 | 0.016551 | 4.70E-05 | 4.72E-04 | 0.002622 | 0        | 2.62E-04 | 0.002444 | 0        | 0.007761 |
| 0        | 0        | 0        | 0        | 0        | 0        | 0.02174  | 0        | 0        | 0        | 0        | 0        | 0        |
| 3.21E-04 | 1.56E-04 | 6.50E-05 | 1.47E-04 | 0        | 0        | 5.31E-04 | 5.30E-05 | 4.11E-04 | 0.001851 | 0        | 2.40E-05 | 0.001305 |
| 0        | 1.34E-04 | 8.10E-05 | 0        | 0        | 1.32E-04 | 0        | 0        | 0        | 0        | 0        | 0        | 0        |
| 0        | 5.40E-05 | 2.50E-05 | 0        | 0        | 0        | 0        | 0        | 2.30E-05 | 0        | 0        | 3.50E-05 | 0        |
| 0        | 0        | 0        | 3.57E-04 | 0.016552 | 4.80E-05 | 8.50E-05 | 0.002227 | 0        | 3.32E-04 | 0.002965 | 0        | 0.01078  |
| 0        | 0        | 0.002564 | 0.004035 | 0        | 4.40E-05 | 2.72E-04 | 0        | 0        | 0        | 8.80E-05 | 1.91E-04 | 0        |
| 1.83E-04 | 1.87E-04 | 7.40E-05 | 3.70E-05 | 0        | 3.05E-04 | 1.72E-04 | 0        | 2.11E-04 | 2.60E-05 | 5.73E-04 | 6.02E-04 | 2.86E-04 |
| 0        | 0        | 0        | 0        | 0        | 0        | 0        | 0        | 0        | 0        | 0        | 0        | 0        |
| 0        | 0        | 2.00E-05 | 2.23E-04 | 0.014445 | 4.00E-05 | 7.00E-05 | 0.002317 | 3.90E-05 | 3.32E-04 | 0.002304 | 0        | 0.010165 |
| 0        | 1.55E-04 | 1.90E-05 | 0        | 0        | 0        | 0        | 0        | 3.30E-05 | 0        | 0        | 0        | 0        |
| 0        | 0        | 2.91E-04 | 7.21E-04 | 0        | 0        | 3.07E-04 | 0        | 0        | 0        | 1.48E-04 | 1.01E-04 | 2.08E-04 |
| 3.80E-05 | 0        | 0.001515 | 2.28E-04 | 0        | 0        | 1.90E-04 | 0        | 3.40E-05 | 0        | 0        | 0.001155 | 0        |
| 0        | 0        | 0        | 1.11E-04 | 0.01073  | 0        | 6.16E-04 | 0.001669 | 4.00E-05 | 1.69E-04 | 0.001975 | 0        | 0.008902 |
| 1.17E-04 | 0        | 6.40E-05 | 0        | 0        | 4.60E-05 | 4.30E-05 | 0        | 2.86E-04 | 1.04E-04 | 1.19E-04 | 1.31E-04 | 0        |
| 0.010519 | 0        | 0.002344 | 0        | 0        | 0        | 0        | 0        | 0        | 0        | 0        | 0        | 0        |
| 0.012835 | 0        | 0.01146  | 0        | 0        | 0        | 0        | 2.50E-05 | 0        | 0        | 0        | 0        | 0        |
| 0        | 0        | 0        | 0        | 0        | 0        | 0.00107  | 0        | 1.91E-04 | 0        | 0        | 0        | 0        |
| 0        | 0        | 0        | 0        | 0        | 0        | 0        | 0        | 0        | 0        | 0        | 0        | 0        |
| 0        | 0        | 0        | 1.54E-04 | 0.018252 | 0        | 1.50E-05 | 0.001045 | 0        | 2.45E-04 | 0.001007 | 0        | 0.00501  |
| 0        | 0        | 0        | 0        | 0        | 0        | 0        | 0        | 0        | 0        | 0        | 0        | 0        |
| 0        | 0        | 5.20E-05 | 1.41E-04 | 0        | 0        | 0        | 9.73E-04 | 2.80E-05 | 0        | 0.001006 | 1.70E-05 | 0        |
| 0        | 0        | 0        | 2.46E-04 | 0        | 0        | 0        | 1.84E-04 | 0        | 0        | 1.16E-04 | 0        | 0        |
| 0.026175 | 0        | 1.70E-05 | 0        | 0        | 0        | 0        | 0        | 0        | 0        | 0        | 0        | 0        |
| 0        | 0        | 2.13E-04 | 8.53E-04 | 0        | 0        | 1.56E-04 | 0        | 0        | 0        | 5.30E-05 | 0        | 5.13E-04 |
| 0.067463 | 0.007773 | 0.040092 | 0.025837 | 0.182749 | 0.004758 | 0.037538 | 0.040353 | 0.008748 | 0.010553 | 0.034455 | 0.005514 | 0.120766 |

| H120     | H093     | H098     | H035     | H028     | H067     | H113     | H127     | H003     | H044     | H092     | H142     | H029     |
|----------|----------|----------|----------|----------|----------|----------|----------|----------|----------|----------|----------|----------|
| 0.185874 | 0.181027 | 0.180327 | 0.178113 | 0.177375 | 0.176786 | 0.176761 | 0.175645 | 0.173383 | 0.172777 | 0.171099 | 0.170413 | 0.169099 |
| 0.046731 | 0.268727 | 0.054211 | 0.088094 | 0.173307 | 0.303732 | 0.131613 | 0.168372 | 0.073752 | 0.18714  | 0.09638  | 0.040731 | 0.105832 |
| 0.076673 | 0.070816 | 0.098889 | 0.050206 | 0.023337 | 0.027772 | 0.086317 | 0.050147 | 0.16202  | 0.045008 | 0.069329 | 0.067191 | 0.066918 |
| 0.044698 | 0.063654 | 0.087422 | 0.050013 | 0.049775 | 0.053066 | 0.038711 | 0.063809 | 0.039286 | 0.113098 | 0.064697 | 0.239579 | 0.075981 |
| 0.005852 | 0.023434 | 0.072818 | 0.008716 | 0.028729 | 0.042553 | 0.019434 | 0.050821 | 0.013353 | 0.060344 | 0.033358 | 0.076694 | 0.016272 |
| 0.030242 | 0.073123 | 0.030717 | 0.113977 | 0.037432 | 0.1124   | 0.037616 | 0.089741 | 0.058637 | 0.12621  | 0.11591  | 0.053956 | 0.019621 |
| 0.081461 | 0.043726 | 0.127276 | 0.10486  | 0.06858  | 0.057276 | 0.125026 | 0.082207 | 0.074369 | 0.008489 | 0.150897 | 0.044401 | 0.1095   |
| 0.013685 | 0.103091 | 0.008927 | 0.165351 | 0.036895 | 0.021218 | 0.080763 | 0.045763 | 0.059444 | 0.010936 | 0.060746 | 0.030301 | 0.0393   |
| 0.133126 | 0.053264 | 0.121267 | 0.072951 | 0.027437 | 0.066892 | 0.026385 | 0.042757 | 0.101093 | 0.059542 | 0.046283 | 0.046697 | 0.052727 |
| 0.017154 | 0.009598 | 0.018425 | 0.009664 | 0.013126 | 0.028484 | 0.009848 | 0.022632 | 0.024025 | 0.089321 | 0.006207 | 0.044135 | 0.016779 |
| 0.039073 | 0.007086 | 0.0165   | 0.005179 | 0.008142 | 0.006275 | 0.011677 | 0.007952 | 0.033475 | 0.021856 | 0.003353 | 0.018921 | 0.011875 |
| 0.003445 | 0.025796 | 0.002536 | 0.003602 | 0.002803 | 0.004528 | 0.056118 | 0.030277 | 0.006698 | 0.004749 | 0.014158 | 0.015392 | 0.002303 |
| 0.004125 | 0.00238  | 4.95E-04 | 0.006266 | 0.002361 | 0.002595 | 0.021163 | 0.006335 | 0.014033 | 0.006693 | 0.014258 | 0.009764 | 0.005659 |
| 0.004215 | 0.009651 | 0.006521 | 0.0065   | 0.006418 | 0.013695 | 0.003741 | 0.015597 | 0.002929 | 0.009977 | 0.006764 | 0.012134 | 0.002853 |
| 8.77E-04 | 0.005879 | 0.00973  | 0.014376 | 0.013354 | 0.010774 | 0.008787 | 0.011563 | 6.28E-04 | 0.004268 | 0.010559 | 0.014805 | 0.011421 |
| 0.005484 | 0.005028 | 0.003048 | 0.009737 | 0.003794 | 0.003756 | 0.011751 | 0.013614 | 0.005198 | 0.006157 | 0.007514 | 0.011101 | 0.004855 |
| 0.005103 | 0.004619 | 0.019176 | 0.00514  | 0.012204 | 0.005854 | 0.006276 | 0.015604 | 0.004419 | 0.009734 | 0.008232 | 0.004605 | 0.010411 |
| 1.19E-04 | 0        | 1.59E-04 | 1.59E-04 | 0        | 1.06E-04 | 8.70E-05 | 3.60E-05 | 6.12E-04 | 1.14E-04 | 0        | 1.34E-04 | 1.46E-04 |
| 0        | 6.60E-05 | 0        | 0        | 0        | 3.00E-05 | 0        | 0        | 0        | 0        | 0        | 0        | 2.50E-05 |
| 0.232531 | 0.001497 | 0.010234 | 2.70E-04 | 0.014309 | 0.004405 | 8.60E-04 | 3.99E-04 | 0.056267 | 7.02E-04 | 2.09E-04 | 0.002195 | 1.30E-04 |
| 6.23E-04 | 2.02E-04 | 7.49E-04 | 3.12E-04 | 3.99E-04 | 0.004275 | 0.002137 | 0.001381 | 0.005048 | 4.27E-04 | 4.90E-04 | 0.021159 | 6.52E-04 |
| 8.50E-04 | 0.008238 | 0.051143 | 0.011856 | 0.007841 | 4.86E-04 | 0.019712 | 0.014171 | 1.51E-04 | 2.92E-04 | 0.010658 | 0        | 0.001031 |
| 0.003486 | 0.001949 | 0.006737 | 0.006214 | 0.004729 | 0.00509  | 0.00551  | 0.011641 | 0.003728 | 0.004859 | 0.003706 | 0.006552 | 0.004339 |
| 0.002451 | 0.001847 | 0.001385 | 0.011165 | 0.002144 | 0.005815 | 0.003767 | 0.005422 | 0.003684 | 0.00291  | 0.009254 | 0.0012   | 0.001639 |
| 6.72E-04 | 0.001294 | 0.00679  | 4.33E-04 | 0.00266  | 0.002796 | 9.87E-04 | 0.009397 | 6.04E-04 | 6.11E-04 | 0.002122 | 0.0047   | 0.002173 |
| 0.001592 | 3.40E-05 | 7.92E-04 | 0.001242 | 0.001766 | 4.13E-04 | 0.002802 | 2.00E-04 | 0.009167 | 2.54E-04 | 1.66E-04 | 0        | 0.005135 |
| 0.002542 | 0.002869 | 0.003209 | 0.005514 | 0.004917 | 0.002258 | 0.002644 | 0.005472 | 0.002154 | 0.002029 | 0.009878 | 0.003413 | 0.002436 |
| 0.002728 | 0.002094 | 0.003988 | 5.63E-04 | 0.002491 | 0.003556 | 9.10E-04 | 0.005172 | 0.003279 | 0.007475 | 0.001429 | 0.005311 | 0.003062 |
| 0.003129 | 0.001298 | 0.008724 | 1.50E-05 | 0.005684 | 7.27E-04 | 0.003619 | 6.53E-04 | 5.60E-04 | 0.011714 | 8.72E-04 | 0.005867 | 0.008117 |
| 0.001448 | 0.00415  | 8.10E-04 | 2.66E-04 | 0.004264 | 2.21E-04 | 0.004527 | 0.004056 | 6.51E-04 | 0.002072 | 0.002622 | 0.00761  | 0.012178 |
| 0.005471 | 1.99E-04 | 0.00722  | 0.001726 | 4.57E-04 | 7.39E-04 | 0.005595 | 9.94E-04 | 0.008317 | 0.001205 | 0.001278 | 0.002329 | 0.002923 |
| 0.001082 | 0.00124  | 0.009542 | 0        | 0.006317 | 5.79E-04 | 0.00112  | 0.003223 | 9.80E-04 | 3.10E-05 | 0.001936 | 0.001939 | 0.004082 |
| 0.002259 | 0.001282 | 0.001296 | 0.008588 | 0.002667 | 0.004673 | 0.001303 | 0.002398 | 0.00203  | 0.001209 | 0.004636 | 0.00297  | 0.002616 |
| 0.002537 | 0.001409 | 0.007779 | 7.15E-04 | 0.002294 | 0.001208 | 0.001323 | 0.001346 | 9.01E-04 | 0.003545 | 0.003265 | 0.003111 | 0.002565 |
| 0.00794  | 8.74E-04 | 0.001629 | 0.003546 | 7.02E-04 | 6.59E-04 | 0.01535  | 0.008969 | 0.005645 | 0.003068 | 0.012908 | 0.003334 | 0.002259 |
| 4.40E-05 | 0        | 3.70E-05 | 3.40E-05 | 0.034891 | 0        | 1.24E-04 | 3.00E-05 | 4.39E-04 | 5.10E-05 | 0        | 2.40E-05 | 0.076415 |
| 3.17E-04 | 0.002184 | 9.70E-04 | 0.001976 | 0.001965 | 9.52E-04 | 0.001032 | 0.003073 | 3.61E-04 | 0.002488 | 0.003424 | 0.001434 | 7.19E-04 |
| 7.73E-04 | 2.60E-04 | 5.60E-04 | 6.67E-04 | 7.36E-04 | 6.94E-04 | 0.006162 | 7.80E-05 | 0.001312 | 7.18E-04 | 2.91E-04 | 6.89E-04 | 7.42E-04 |
| 0.006355 | 4.18E-04 | 9.72E-04 | 0.003406 | 3.01E-04 | 0.001077 | 0.001229 | 9.24E-04 | 1.17E-04 | 0.001003 | 0.004738 | 2.77E-04 | 0.001982 |
| 0.001009 | 9.10E-05 | 5.83E-04 | 7.35E-04 | 4.20E-05 | 3.80E-05 | 0.002005 | 7.50E-05 | 0.004819 | 1.44E-04 | 1.13E-04 | 5.10E-05 | 0.001715 |
| 2.65E-04 | 0        | 1.92E-04 | 2.82E-04 | 0.04929  | 3.60E-05 | 4.88E-04 | 7.90E-05 | 0.001755 | 1.79E-04 | 0        | 5.70E-05 | 0.025043 |
| 1.08E-04 | 5.60E-04 | 3.09E-04 | 2.29E-04 | 2.48E-04 | 1.00E-04 | 0.003598 | 0.001087 | 4.10E-04 | 6.11E-04 | 3.52E-04 | 0.003546 | 5.43E-04 |
| 0        | 0.004895 | 0        | 3.73E-04 | 0.002432 | 4.91E-04 | 0.008857 | 0.003582 | 0        | 1.24E-04 | 0.012766 | 1.32E-04 | 7.93E-04 |
| 2.90E-05 | 4.19E-04 | 0        | 6.34E-04 | 3.90E-05 | 6.40E-05 | 0.005401 | 3.10E-04 | 0.002522 | 0        | 0.00281  | 4.08E-04 | 1.65E-04 |
| 8.96E-04 | 5.43E-04 | 1.34E-04 | 0.012045 | 7.18E-04 | 7.63E-04 | 0.0019   | 0.005092 | 0.001618 | 9.29E-04 | 0.006939 | 2.99E-04 | 5.34E-04 |
| 3.85E-04 | 8.56E-04 | 0.002178 | 7.03E-04 | 0.00108  | 5.29E-04 | 0.002468 | 0.001118 | 0.001138 | 9.93E-04 | 0.001355 | 0.001465 | 0.001499 |
| 9.65E-04 | 3.80E-05 | 5.67E-04 | 7.50E-05 | 5.00E-05 | 1.39E-04 | 0.001847 | 0        | 0.001062 | 5.50E-05 | 0        | 2.60E-05 | 3.39E-04 |
| 8.90E-05 | 0.00105  | 4.10E-05 | 0.00175  | 1.36E-04 | 0.002438 | 7.09E-04 | 0.002608 | 4.90E-04 | 2.12E-04 | 9.42E-04 | 1.79E-04 | 5.80E-05 |
| 3.02E-04 | 6.60E-05 | 1.15E-04 | 4.30E-05 | 0        | 7.50E-05 | 3.91E-04 | 1.03E-04 | 8.05E-04 | 1.36E-04 | 1.22E-04 | 0.009068 | 3.59E-04 |
| 0        | 1.06E-04 | 0        | 0        | 3.70E-05 | 0        | 0.005552 | 0        | 0        | 0        | 5.36E-04 | 0        | 0        |
| 0.001516 | 2.30E-04 | 5.60E-05 | 0.005259 | 0        | 0.001575 | 6.60E-05 | 3.28E-04 | 7.60E-05 | 8.27E-04 | 0.002    | 2.30E-05 | 9.41E-04 |
| 6.81E-04 | 3.65E-04 | 2.05E-04 | 0.001751 | 0.001631 | 6.33E-04 | 3.80E-04 | 2.73E-04 | 7.70E-05 | 0.003907 | 0.001673 | 2.01E-04 | 0.001374 |
| 2.18E-04 | 0        | 2.09E-04 | 7.10E-05 | 0.038458 | 0        | 2.41E-04 | 7.60E-05 | 0.001145 | 4.70E-05 | 4.40E-05 | 0        | 0.021649 |
| 5.16E-04 | 0        | 2.85E-04 | 0.003056 | 0        | 0        | 9.17E-04 | 8.20E-05 | 0.002129 | 2.70E-05 | 0        | 2.80E-05 | 7.59E-04 |
| 3.14E-04 | 2.21E-04 | 0        | 6.31E-04 | 1.24E-04 | 3.32E-04 | 8.24E-04 | 7.60E-05 | 5.24E-04 | 2.35E-04 | 3.26E-04 | 1.41E-04 | 7.41E-04 |
| 8.34E-04 | 2.70E-05 | 6.22E-04 | 1.59E-04 | 0        | 0        | 0.002801 | 2.60E-04 | 0.001228 | 1.12E-04 | 3.60E-05 | 0        | 4.25E-04 |

|          |          |          |          |          |          |          |          |          |          |          |          |          |
|----------|----------|----------|----------|----------|----------|----------|----------|----------|----------|----------|----------|----------|
| 2.51E-04 | 1.04E-04 | 7.80E-05 | 3.97E-04 | 1.69E-04 | 3.23E-04 | 7.15E-04 | 0        | 2.12E-04 | 1.34E-04 | 3.17E-04 | 0        | 0        |
| 6.05E-04 | 0        | 4.30E-04 | 0        | 2.90E-05 | 0        | 8.50E-04 | 0        | 9.04E-04 | 8.40E-05 | 0        | 0        | 5.23E-04 |
| 1.32E-04 | 3.00E-05 | 5.30E-05 | 2.64E-04 | 0        | 0        | 8.89E-04 | 0        | 7.86E-04 | 2.20E-05 | 0        | 2.00E-05 | 3.84E-04 |
| 6.73E-04 | 0        | 4.40E-05 | 2.20E-05 | 0        | 3.40E-05 | 1.47E-04 | 4.00E-05 | 2.99E-04 | 0.001267 | 7.90E-05 | 5.19E-04 | 7.70E-05 |
| 1.88E-04 | 0        | 4.20E-05 | 2.00E-05 | 0.026305 | 0        | 1.28E-04 | 0        | 7.90E-05 | 0        | 3.40E-05 | 0        | 0.00319  |
| 1.83E-04 | 0        | 1.61E-04 | 2.01E-04 | 1.55E-04 | 0        | 4.79E-04 | 7.60E-05 | 0.001298 | 1.83E-04 | 2.58E-04 | 0        | 0.002143 |
| 2.92E-04 | 0        | 0        | 0        | 0        | 0        | 0        | 1.53E-04 | 0        | 0        | 0        | 0        | 0        |
| 0        | 5.50E-05 | 6.01E-04 | 9.64E-04 | 5.86E-04 | 0.003535 | 1.81E-04 | 8.60E-04 | 0        | 0        | 2.99E-04 | 0        | 0        |
| 0        | 2.58E-04 | 0        | 8.70E-05 | 0        | 4.20E-05 | 0        | 0        | 0        | 0        | 0        | 1.34E-04 | 0        |
| 2.70E-05 | 1.75E-04 | 0        | 3.00E-05 | 0        | 3.50E-05 | 0        | 4.50E-05 | 0        | 0        | 3.40E-05 | 1.26E-04 | 0        |
| 2.28E-04 | 0        | 1.34E-04 | 0.001577 | 0        | 0        | 3.75E-04 | 4.00E-05 | 0.001437 | 0        | 0        | 0        | 1.83E-04 |
| 0        | 8.90E-05 | 0        | 0        | 0        | 0        | 0        | 0        | 0        | 0        | 0        | 7.93E-04 | 6.90E-05 |
| 1.45E-04 | 2.80E-05 | 0.001901 | 0        | 3.71E-04 | 3.10E-05 | 1.27E-04 | 3.77E-04 | 1.68E-04 | 8.80E-05 | 4.30E-04 | 3.55E-04 | 0.001051 |
| 0        | 0        | 0        | 0        | 0        | 0        | 0        | 0        | 0        | 0        | 0        | 0        | 0        |
| 1.99E-04 | 0        | 1.15E-04 | 5.20E-05 | 0        | 0        | 3.06E-04 | 4.10E-05 | 0.001047 | 2.40E-05 | 0        | 0        | 3.54E-04 |
| 0        | 3.77E-04 | 0        | 4.30E-05 | 0        | 9.70E-05 | 0        | 0        | 0        | 0        | 3.30E-05 | 9.60E-05 | 0        |
| 0        | 3.61E-04 | 2.10E-05 | 1.20E-05 | 2.80E-04 | 2.23E-04 | 5.20E-05 | 4.50E-05 | 0        | 0        | 7.80E-05 | 3.02E-04 | 6.20E-05 |
| 0        | 8.80E-05 | 4.03E-04 | 1.20E-05 | 0.00093  | 0        | 0        | 0        | 0        | 0        | 0        | 0        | 2.80E-05 |
| 1.11E-04 | 0        | 6.60E-05 | 0        | 0        | 0        | 2.37E-04 | 0        | 0.001018 | 2.10E-05 | 4.70E-05 | 0        | 1.36E-04 |
| 0        | 3.70E-05 | 5.00E-05 | 0        | 0        | 0        | 0.001076 | 0        | 0        | 0        | 0        | 0        | 3.30E-05 |
| 0        | 0        | 0        | 0        | 0.038365 | 0        | 0        | 0        | 0        | 0        | 0        | 0        | 0.00288  |
| 0        | 0        | 0        | 0        | 0        | 0        | 0        | 0        | 0        | 0        | 0        | 0        | 0.011767 |
| 0        | 0        | 0        | 0        | 0        | 0        | 0        | 2.94E-04 | 0        | 1.66E-04 | 0        | 0        | 0        |
| 0        | 0        | 0        | 0        | 0        | 0        | 0        | 0        | 0        | 0        | 0        | 0        | 0        |
| 9.20E-05 | 0        | 1.40E-04 | 0        | 0        | 0        | 7.97E-04 | 0        | 3.48E-04 | 3.50E-05 | 0        | 0        | 1.91E-04 |
| 0        | 0        | 0        | 0        | 0        | 0        | 0        | 0        | 0        | 0        | 0        | 0        | 0        |
| 1.45E-04 | 0        | 4.37E-04 | 1.50E-05 | 0        | 1.80E-05 | 1.31E-04 | 3.30E-05 | 3.66E-04 | 0        | 0        | 0        | 2.90E-05 |
| 0        | 0        | 6.70E-05 | 0        | 4.50E-05 | 0        | 2.99E-04 | 8.70E-05 | 0        | 0        | 0        | 2.30E-05 | 4.80E-05 |
| 0        | 0        | 0        | 0        | 0.009057 | 0        | 0        | 0        | 0        | 0        | 0        | 0        | 0.001031 |
| 0        | 0        | 0        | 0        | 0        | 0        | 3.10E-05 | 0        | 0        | 0        | 0        | 2.50E-05 | 0        |
| 0.011835 | 0.004628 | 0.006751 | 0.017096 | 0.04282  | 0.010034 | 0.021948 | 0.010889 | 0.019491 | 0.006362 | 0.014751 | 0.006915 | 0.062112 |

| H118     | H054     | H143     | H099     | H083     | H045     | H059     | H032     | H055     | H131     | H086     | H015     | H107     |
|----------|----------|----------|----------|----------|----------|----------|----------|----------|----------|----------|----------|----------|
| 0.168937 | 0.167084 | 0.166864 | 0.161958 | 0.158337 | 0.157414 | 0.145427 | 0.145024 | 0.144393 | 0.144242 | 0.141211 | 0.13814  | 0.135437 |
| 0.142442 | 0.017555 | 0.084362 | 0.065606 | 0.28692  | 0.045907 | 0.088808 | 0.014735 | 0.032544 | 0.118848 | 0.292432 | 0.208137 | 0.138725 |
| 0.062097 | 0.059388 | 0.079036 | 0.068365 | 0.05595  | 0.26645  | 0.036309 | 0.046344 | 0.05904  | 0.089404 | 0.046667 | 0.037957 | 0.094297 |
| 0.040696 | 0.041214 | 0.0623   | 0.032993 | 0.043688 | 0.163021 | 0.016662 | 0.074021 | 0.005507 | 0.048015 | 0.032584 | 0.077463 | 0.042571 |
| 0.011612 | 0.025803 | 0.026031 | 0.032242 | 0.021979 | 0.036545 | 0.002457 | 0.091519 | 0        | 0.198801 | 0.021781 | 0.047087 | 0.012867 |
| 0.094511 | 0.08329  | 0.141628 | 0.037349 | 0.081545 | 0.036705 | 0.029453 | 0.08672  | 0.007702 | 0.036486 | 0.08098  | 0.128647 | 0.042959 |
| 0.10524  | 0.030778 | 0.054795 | 0.231605 | 0.035411 | 0.003371 | 0.006042 | 0.042133 | 0.038126 | 0.043108 | 0.078249 | 0.069166 | 0.051568 |
| 0.133178 | 0.06392  | 0.1677   | 0.025213 | 0.084214 | 0.018236 | 0.049003 | 0.017047 | 0.006347 | 0.03284  | 0.077299 | 0.07544  | 0.06709  |
| 0.053429 | 0.019077 | 0.03256  | 0.048605 | 0.079464 | 0.00925  | 0.030746 | 0.01097  | 0.025084 | 0.018597 | 0.022013 | 0.04392  | 0.081607 |
| 0.007418 | 0.007242 | 0.012163 | 0.014083 | 0.012756 | 0.01189  | 0.010701 | 0.033551 | 0.008727 | 0.023566 | 0.012638 | 0.008127 | 0.022466 |
| 0.007396 | 0.007007 | 0.006115 | 0.003803 | 0.010929 | 0.056801 | 0.006235 | 0.004893 | 0.001484 | 0.010187 | 0.009868 | 0.005873 | 0.044178 |
| 0.009892 | 0.012396 | 0.003625 | 0.010845 | 0.012052 | 0.020041 | 8.50E-05 | 0.0196   | 7.20E-05 | 0.004648 | 0.024631 | 0.026967 | 0.004601 |
| 0.009754 | 0.007249 | 0.004919 | 0.006475 | 0.006391 | 0.01096  | 0.005415 | 0.003947 | 0.015956 | 0.004113 | 0.00353  | 0.00186  | 0.021001 |
| 0.007033 | 0.005508 | 0.007678 | 0.001841 | 0.011054 | 0.004526 | 0.005638 | 0.011501 | 0        | 0.0058   | 0.011758 | 0.018557 | 0.005612 |
| 0.005967 | 0.001473 | 0.00548  | 0.012458 | 0.00736  | 9.40E-05 | 8.20E-05 | 0.006387 | 0        | 0.015228 | 0.014773 | 0.004929 | 0.002539 |
| 0.011252 | 0.004584 | 0.004109 | 0.002854 | 0.007535 | 0.01004  | 0.00586  | 0.001287 | 0.002804 | 0.004629 | 0.008901 | 0.019336 | 0.030854 |
| 0.005327 | 0.016397 | 0.003808 | 0.030779 | 0.00422  | 0.015319 | 0.001238 | 0.011383 | 0.001944 | 0.010023 | 0.013562 | 0.011861 | 0.008498 |
| 0        | 5.80E-04 | 8.30E-05 | 0.002015 | 5.50E-05 | 6.06E-04 | 0        | 2.24E-04 | 7.60E-05 | 2.14E-04 | 1.94E-04 | 2.10E-05 | 0.001324 |
| 0        | 0        | 3.80E-05 | 2.69E-04 | 0        | 2.17E-04 | 0        | 1.60E-05 | 0        | 0        | 0        | 0        | 0        |
| 7.94E-04 | 0        | 0.002074 | 0.003006 | 1.09E-04 | 1.61E-04 | 0        | 0.001954 | 0.010155 | 3.79E-04 | 4.66E-04 | 2.48E-04 | 0.003482 |
| 0.007173 | 0.00109  | 2.11E-04 | 0.018326 | 0.001349 | 7.04E-04 | 0        | 0.002827 | 0.012472 | 0.002726 | 0.001423 | 3.43E-04 | 0.00773  |
| 0.028447 | 0.00333  | 0.016481 | 0.011494 | 0.006092 | 1.17E-04 | 0.004479 | 0.006739 | 0        | 0.014177 | 0.010049 | 0.010715 | 0.00147  |
| 0.004111 | 0.007571 | 0.00669  | 0.00294  | 0.006637 | 0.003624 | 0.002784 | 0.003005 | 0        | 0.002686 | 0.004446 | 0.006772 | 0.003303 |
| 0.005853 | 0.006988 | 0.00546  | 0.002434 | 0.003277 | 7.88E-04 | 1.77E-04 | 0.002241 | 0.005261 | 0.001463 | 0.005687 | 0.004196 | 0.001291 |
| 7.51E-04 | 1.69E-04 | 0.004002 | 0.007309 | 2.88E-04 | 0.002594 | 0        | 0.018367 | 0.001303 | 0.024389 | 0.001014 | 0.003276 | 0.002813 |
| 0.006548 | 0.052238 | 1.26E-04 | 0.003733 | 0.001833 | 7.87E-04 | 0.098671 | 0.003643 | 0.099892 | 0.001041 | 1.11E-04 | 2.70E-05 | 0.013205 |
| 0.005508 | 0.002921 | 0.001886 | 0.003741 | 0.003448 | 3.76E-04 | 0.003885 | 0.003123 | 8.89E-04 | 0.00189  | 0.005339 | 0.002092 | 0.003139 |
| 0.001149 | 0.001428 | 0.006555 | 3.12E-04 | 0.008861 | 0.004259 | 0.002015 | 9.57E-04 | 0        | 0.004088 | 0.001794 | 0.005349 | 0.002462 |
| 5.40E-04 | 0.001524 | 0.001063 | 0.008769 | 1.70E-04 | 0.005095 | 5.95E-04 | 0.001775 | 8.75E-04 | 0.005459 | 0        | 7.15E-04 | 0.001006 |
| 0.003904 | 0.008252 | 0.005069 | 0.014704 | 0.002255 | 2.67E-04 | 0.00219  | 0.010345 | 0.003738 | 0.005629 | 0.004511 | 0.003052 | 0.001111 |
| 0.002222 | 0.015337 | 8.75E-04 | 0.051089 | 0.001022 | 0.005515 | 0.018855 | 0.001667 | 0.016364 | 0.007038 | 0.001006 | 1.02E-04 | 0.037322 |
| 1.08E-04 | 5.82E-04 | 0.001899 | 0.004032 | 1.05E-04 | 3.10E-05 | 0        | 6.20E-04 | 7.80E-05 | 0.005003 | 0.001848 | 0.001832 | 7.60E-05 |
| 0.003182 | 0.003347 | 0.009618 | 0.001031 | 0.001622 | 6.61E-04 | 0        | 0.001603 | 4.50E-04 | 0.001844 | 0.004186 | 0.002024 | 5.69E-04 |
| 6.19E-04 | 9.88E-04 | 0.001776 | 0.00254  | 5.63E-04 | 0.003529 | 4.89E-04 | 0.001074 | 0        | 0.006068 | 0.001542 | 0.001481 | 9.94E-04 |
| 0.006432 | 0.003389 | 0.001932 | 0.012288 | 0.010751 | 0.001085 | 8.00E-05 | 0.009992 | 7.86E-04 | 0.004738 | 0.002483 | 7.58E-04 | 0.002868 |
| 4.19E-04 | 0.003155 | 0        | 3.07E-04 | 0        | 0        | 0.004849 | 0.060779 | 0.00563  | 7.00E-05 | 0        | 2.40E-05 | 8.50E-04 |
| 0.002924 | 0.003671 | 0.011408 | 0.004297 | 0.002458 | 0.001715 | 0        | 0.029016 | 0        | 0.005009 | 0.003974 | 0.002749 | 0.003694 |
| 0.001771 | 0.001527 | 8.73E-04 | 7.60E-04 | 0.001844 | 0.005573 | 0        | 0.0597   | 1.57E-04 | 0.003967 | 0.001276 | 0.002707 | 0.001317 |
| 0.001302 | 0.009697 | 0.007333 | 9.58E-04 | 0.001808 | 0.005875 | 4.37E-04 | 0.002904 | 0        | 0.005414 | 0.004177 | 1.94E-04 | 5.58E-04 |
| 0.003539 | 0.034226 | 0        | 0.002452 | 3.10E-04 | 5.06E-04 | 0.061744 | 3.29E-04 | 0.060609 | 8.80E-04 | 2.90E-05 | 1.26E-04 | 0.010557 |
| 7.14E-04 | 0.008204 | 0.001505 | 8.50E-04 | 3.52E-04 | 4.31E-04 | 0.015761 | 0.01855  | 0.017018 | 2.51E-04 | 2.95E-04 | 4.60E-05 | 0.002472 |
| 3.55E-04 | 2.32E-04 | 3.75E-04 | 4.25E-04 | 0.001155 | 0.005303 | 0        | 1.00E-04 | 0        | 4.35E-04 | 0.002128 | 2.94E-04 | 4.90E-05 |
| 0.003153 | 0.00154  | 2.41E-04 | 2.60E-05 | 5.90E-05 | 2.91E-04 | 0        | 0.006624 | 0        | 0.002186 | 0.00275  | 0.00904  | 0.002123 |
| 3.83E-04 | 0.00187  | 0.001257 | 0.001537 | 6.60E-05 | 1.81E-04 | 0        | 0.00121  | 0.008153 | 2.08E-04 | 1.20E-04 | 4.60E-05 | 7.53E-04 |
| 0.001355 | 0.006495 | 0.004713 | 0.001463 | 0.001875 | 0.001841 | 0.004816 | 9.08E-04 | 0        | 0.002584 | 0.00842  | 5.44E-04 | 0.001174 |
| 0.001414 | 0        | 8.44E-04 | 0.00121  | 8.17E-04 | 0.001831 | 0.001084 | 0.00113  | 0        | 0.001055 | 0.002153 | 7.07E-04 | 0.003435 |
| 8.93E-04 | 0.018927 | 4.60E-05 | 0.00211  | 1.60E-05 | 1.34E-04 | 0.059193 | 1.46E-04 | 0.074774 | 8.77E-04 | 3.10E-05 | 0        | 0.011321 |
| 3.56E-04 | 0.002399 | 7.39E-04 | 6.86E-04 | 0.003571 | 6.79E-04 | 0        | 0.007289 | 0        | 1.36E-04 | 0.003334 | 0.003442 | 0        |
| 5.60E-05 | 3.65E-04 | 1.66E-04 | 2.40E-04 | 2.59E-04 | 0.001724 | 0        | 5.80E-05 | 0.001524 | 0.005256 | 2.90E-04 | 0.003411 | 4.59E-04 |
| 3.08E-04 | 0        | 2.63E-04 | 0.00171  | 8.50E-05 | 5.69E-04 | 0        | 3.20E-05 | 0        | 2.42E-04 | 6.00E-05 | 0        | 0        |
| 9.53E-04 | 0.006208 | 0.011244 | 2.20E-05 | 0.002262 | 0.004197 | 0        | 3.66E-04 | 0        | 0.002095 | 0.004034 | 1.98E-04 | 0        |
| 2.39E-04 | 0.004128 | 3.49E-04 | 7.26E-04 | 3.76E-04 | 0.002272 | 9.31E-04 | 0.019617 | 0.001679 | 0.005973 | 1.72E-04 | 3.13E-04 | 0.005942 |
| 5.30E-04 | 0.006979 | 0        | 4.17E-04 | 2.30E-05 | 1.22E-04 | 0.009972 | 0.011663 | 0.010794 | 1.39E-04 | 0        | 1.70E-05 | 0.00148  |
| 0.001588 | 0.017038 | 0        | 9.28E-04 | 1.00E-04 | 3.11E-04 | 0.027804 | 1.44E-04 | 0.029295 | 3.22E-04 | 2.50E-05 | 0        | 0.004255 |
| 1.87E-04 | 0.00296  | 5.49E-04 | 6.84E-04 | 2.22E-04 | 0.001485 | 0        | 0.009437 | 0        | 0.002143 | 2.79E-04 | 5.23E-04 | 3.35E-04 |
| 4.72E-04 | 0.009924 | 0        | 0.002903 | 7.10E-05 | 2.94E-04 | 0.018903 | 2.52E-04 | 0.02409  | 7.00E-04 | 5.70E-05 | 1.80E-05 | 0.005694 |

|          |          |          |          |          |          |          |          |          |          |          |          |          |
|----------|----------|----------|----------|----------|----------|----------|----------|----------|----------|----------|----------|----------|
| 0.002713 | 0.001918 | 7.50E-04 | 0.001341 | 8.70E-05 | 3.01E-04 | 0        | 0.005257 | 0.001934 | 0.001872 | 2.73E-04 | 1.80E-05 | 6.01E-04 |
| 5.21E-04 | 0.010582 | 0        | 0.001739 | 0        | 0        | 0.021131 | 1.54E-04 | 0.02188  | 4.26E-04 | 0        | 2.40E-05 | 0.004156 |
| 5.37E-04 | 0.005041 | 0        | 3.23E-04 | 2.00E-05 | 9.00E-05 | 0.011102 | 5.40E-05 | 0.01444  | 0.002161 | 0        | 0        | 0.001272 |
| 0        | 4.24E-04 | 3.80E-05 | 7.20E-05 | 2.50E-05 | 0.003331 | 0        | 9.59E-04 | 0        | 3.05E-04 | 1.96E-04 | 5.00E-05 | 0        |
| 5.20E-05 | 2.49E-04 | 0        | 0        | 1.40E-05 | 0.006617 | 6.52E-04 | 0.002562 | 0.001031 | 1.70E-05 | 2.10E-05 | 0        | 2.15E-04 |
| 5.47E-04 | 0.006249 | 0        | 3.59E-04 | 5.30E-05 | 6.45E-04 | 0.010716 | 1.67E-04 | 0.012499 | 1.58E-04 | 1.46E-04 | 7.40E-05 | 0.001182 |
| 0        | 0        | 0        | 0        | 0        | 0.024755 | 0        | 0        | 0        | 0        | 0        | 0        | 0        |
| 4.98E-04 | 8.05E-04 | 3.90E-05 | 6.74E-04 | 8.36E-04 | 0        | 0.001906 | 1.60E-04 | 0        | 0        | 0.001128 | 8.86E-04 | 0        |
| 0        | 0        | 1.86E-04 | 0        | 8.50E-05 | 0        | 0        | 0        | 0        | 0        | 0        | 1.50E-05 | 0        |
| 0        | 0        | 1.29E-04 | 0        | 9.80E-05 | 0        | 0        | 0        | 0        | 0        | 0        | 3.20E-05 | 0        |
| 6.80E-04 | 0.006067 | 0        | 3.22E-04 | 4.30E-05 | 9.00E-05 | 0.010721 | 9.90E-05 | 0.012522 | 1.49E-04 | 0        | 0        | 0.001596 |
| 0        | 0        | 0        | 0        | 0        | 2.04E-04 | 0        | 5.50E-05 | 0        | 0        | 0        | 0        | 0        |
| 3.30E-04 | 7.39E-04 | 4.90E-05 | 4.59E-04 | 1.25E-04 | 1.06E-04 | 0        | 4.70E-05 | 0        | 3.48E-04 | 1.67E-04 | 7.75E-04 | 4.25E-04 |
| 0        | 0        | 0        | 0        | 0        | 0        | 0        | 0        | 0        | 0        | 0        | 0        | 0        |
| 6.56E-04 | 0.004703 | 0        | 2.32E-04 | 4.30E-05 | 1.97E-04 | 0.008912 | 6.50E-05 | 0.013047 | 1.47E-04 | 0        | 2.30E-05 | 0.002398 |
| 0        | 0        | 3.90E-04 | 0        | 1.00E-04 | 0        | 0        | 0        | 0        | 0        | 9.80E-05 | 1.90E-05 | 0        |
| 0        | 0        | 3.13E-04 | 4.45E-04 | 3.10E-05 | 4.05E-04 | 0        | 4.81E-04 | 0        | 0.004284 | 0        | 0        | 4.67E-04 |
| 5.80E-05 | 0        | 3.90E-05 | 0        | 0        | 4.30E-04 | 0        | 0        | 9.71E-04 | 0.021239 | 0        | 0        | 5.26E-04 |
| 4.19E-04 | 0.004618 | 0        | 3.24E-04 | 0        | 5.60E-05 | 0.007308 | 2.60E-05 | 0.009151 | 9.40E-05 | 8.90E-05 | 0        | 0.001952 |
| 6.50E-05 | 0        | 1.30E-04 | 0        | 8.80E-05 | 0        | 0        | 7.80E-05 | 0        | 0        | 1.28E-04 | 1.80E-05 | 0        |
| 0        | 0        | 0        | 0        | 0        | 0        | 0        | 0.001251 | 0        | 0        | 0        | 0        | 0        |
| 0        | 7.60E-05 | 0        | 0        | 0        | 0        | 0        | 0.002236 | 7.30E-05 | 0        | 0        | 0        | 0        |
| 0        | 0.0133   | 0        | 0        | 0        | 0.002442 | 0        | 0        | 0        | 0        | 0        | 0        | 0        |
| 0        | 0        | 0        | 0        | 0        | 0        | 0        | 0        | 0        | 0        | 0        | 0        | 0        |
| 3.76E-04 | 0.002935 | 0        | 1.20E-04 | 5.20E-05 | 5.80E-05 | 0.005644 | 2.60E-05 | 0.005684 | 4.80E-05 | 0        | 0        | 0.001153 |
| 0        | 0        | 0        | 0        | 0        | 0        | 0        | 0        | 0        | 0        | 0        | 0        | 0        |
| 2.80E-05 | 0.002001 | 8.20E-05 | 0.001803 | 0        | 3.70E-05 | 0        | 5.70E-05 | 0        | 3.60E-04 | 1.19E-04 | 0        | 5.48E-04 |
| 0        | 7.30E-05 | 0        | 2.60E-05 | 0        | 0.001177 | 0        | 0        | 0        | 1.40E-05 | 0        | 3.10E-05 | 0        |
| 0        | 0        | 0        | 0        | 0        | 0        | 0        | 9.18E-04 | 0        | 0        | 0        | 0        | 0        |
| 0        | 0        | 0        | 0        | 0        | 0        | 0        | 1.31E-04 | 0        | 0.012197 | 0        | 0        | 4.90E-05 |
| 0.016087 | 0.120976 | 0.026939 | 0.029944 | 0.012329 | 0.026739 | 0.142033 | 0.063729 | 0.170976 | 0.018872 | 0.025055 | 0.007166 | 0.035957 |

| H064     | H111     | H088     | H047     | H124     | H046     | H139     | H048     | H070     | H009     | H072     | H020     | H002     |
|----------|----------|----------|----------|----------|----------|----------|----------|----------|----------|----------|----------|----------|
| 0.13425  | 0.131624 | 0.12816  | 0.123058 | 0.122772 | 0.122242 | 0.121282 | 0.120264 | 0.119093 | 0.118528 | 0.117706 | 0.117074 | 0.115849 |
| 0.345139 | 0.136119 | 0.248758 | 0.210789 | 0.187886 | 0.323649 | 0.032603 | 0.36266  | 0.267999 | 0.100569 | 0.130936 | 0.273621 | 0.260728 |
| 0.050485 | 0.076273 | 0.109888 | 0.084491 | 0.130718 | 0.050405 | 0.161754 | 0.046203 | 0.115853 | 0.032794 | 0.032271 | 0.057623 | 0.044779 |
| 0.050659 | 0.046474 | 0.04709  | 0.04605  | 0.056555 | 0.036164 | 0.25661  | 0.017976 | 0.034931 | 0.044313 | 0.041537 | 0.052795 | 0.118189 |
| 0.029592 | 0.009332 | 0.014179 | 0.008595 | 0.02167  | 0.01314  | 0.008416 | 0.002382 | 0.107193 | 0.044017 | 0.046115 | 0.021299 | 0.020765 |
| 0.113744 | 0.052997 | 0.061768 | 0.104442 | 0.039668 | 0.103208 | 0.017501 | 0.042685 | 0.02381  | 0.175058 | 0.201216 | 0.06845  | 0.047639 |
| 0.03125  | 0.225211 | 0.063543 | 0.036362 | 0.131148 | 0.028738 | 0.028936 | 0.014511 | 0.016177 | 0.102344 | 0.082771 | 0.09973  | 0.094852 |
| 0.018954 | 0.091241 | 0.091051 | 0.117037 | 0.038318 | 0.152875 | 0.020655 | 0.064092 | 0.018037 | 0.095072 | 0.051002 | 0.045118 | 0.058372 |
| 0.072573 | 0.074487 | 0.04085  | 0.046214 | 0.070711 | 0.052668 | 0.130326 | 0.141023 | 0.145486 | 0.023675 | 0.033237 | 0.031814 | 0.038134 |
| 0.010792 | 0.013534 | 0.030186 | 0.007145 | 0.016881 | 0.009162 | 0.076562 | 0.014074 | 0.0166   | 0.008968 | 0.007378 | 0.040797 | 0.062563 |
| 0.007157 | 0.007996 | 0.012285 | 0.007007 | 0.010887 | 0.005752 | 0.019733 | 0.082101 | 0.016799 | 0.005217 | 0.003582 | 0.037452 | 0.004044 |
| 0.046541 | 0.003413 | 0.004353 | 0.026372 | 0.014138 | 0.013696 | 0.00538  | 0.011455 | 0.004412 | 0.055682 | 0.054107 | 0.008977 | 0.016028 |
| 0.001666 | 0.013149 | 0.007342 | 0.015258 | 0.01059  | 0.007224 | 0.015881 | 0.008842 | 0.024465 | 0.004003 | 0.006078 | 0.005272 | 7.29E-04 |
| 0.015518 | 0.004884 | 0.004281 | 0.008676 | 0.00282  | 0.006945 | 0.004495 | 0.004938 | 0.006156 | 0.006906 | 0.013166 | 0.009555 | 0.005308 |
| 0.00103  | 0.008786 | 0.008874 | 6.34E-04 | 0.006641 | 0.006832 | 0.016319 | 0.001799 | 0.002619 | 0.01324  | 0.00527  | 0.016778 | 0.011584 |
| 0.007638 | 0.010599 | 0.006478 | 0.009435 | 0.014851 | 0.009804 | 0.008837 | 0.006887 | 0.004029 | 0.003437 | 0.00193  | 0.005577 | 0.002688 |
| 0.00743  | 0.001813 | 0.005325 | 0.004829 | 0.012668 | 0.002058 | 0.004516 | 0.002461 | 0.008794 | 0.018877 | 0.014624 | 0.011239 | 0.016384 |
| 6.80E-05 | 1.19E-04 | 2.29E-04 | 2.48E-04 | 2.05E-04 | 6.50E-05 | 3.23E-04 | 1.97E-04 | 3.90E-05 | 2.60E-05 | 0        | 1.06E-04 | 1.02E-04 |
| 0        | 2.80E-05 | 1.61E-04 | 3.60E-05 | 0        | 0        | 0        | 0        | 3.10E-05 | 0        | 0.020868 | 0        | 0        |
| 0.007757 | 0.021302 | 0.022043 | 0.030915 | 0.003553 | 7.94E-04 | 0.005757 | 4.10E-05 | 3.70E-05 | 1.10E-04 | 0.002343 | 0.002603 | 0.001527 |
| 2.10E-05 | 0.001475 | 0.0019   | 3.39E-04 | 0.002203 | 4.49E-04 | 0.011728 | 0.001622 | 0.006246 | 0.00326  | 5.61E-04 | 0.001295 | 0.001434 |
| 1.11E-04 | 0.011187 | 1.67E-04 | 0.017913 | 0.002316 | 0.017943 | 1.50E-04 | 0.001364 | 2.03E-04 | 0.015624 | 0.013496 | 0.002253 | 0.010343 |
| 0.004979 | 0.002339 | 0.004011 | 0.011815 | 0.002842 | 9.07E-04 | 0.004309 | 0.002184 | 0.003436 | 0.010758 | 0.003831 | 0.002414 | 0.003327 |
| 0.002783 | 0.00477  | 0.003677 | 0.004188 | 0.002009 | 0.004169 | 4.03E-04 | 0.002483 | 9.91E-04 | 0.003885 | 0.00562  | 0.002297 | 0.001977 |
| 0.001471 | 3.66E-04 | 0.001449 | 6.00E-04 | 0.002163 | 1.65E-04 | 3.06E-04 | 4.76E-04 | 0.009853 | 0.001989 | 0.001858 | 2.23E-04 | 5.36E-04 |
| 2.34E-04 | 5.56E-04 | 0.002143 | 0.001873 | 0.001505 | 2.37E-04 | 2.94E-04 | 7.20E-05 | 1.09E-04 | 0.011136 | 1.12E-04 | 0.001293 | 0.001611 |
| 0.001308 | 0.007009 | 0.00302  | 0.002635 | 0.002761 | 0.001536 | 0.002461 | 0.002852 | 0.002314 | 0.003965 | 0.003269 | 0.004393 | 0.002453 |
| 0.007065 | 0.001478 | 0.002458 | 0.006928 | 0.002209 | 0.002009 | 0.0011   | 4.99E-04 | 0.001955 | 0.002157 | 0.005169 | 9.07E-04 | 0.00145  |
| 6.16E-04 | 1.28E-04 | 0.001318 | 0        | 0.003192 | 2.51E-04 | 0.004521 | 8.42E-04 | 0.004077 | 4.90E-05 | 4.48E-04 | 0.001557 | 1.86E-04 |
| 5.68E-04 | 0.002162 | 0.001141 | 0.006644 | 0.004696 | 0.001534 | 0.00218  | 5.65E-04 | 0.002254 | 0.00597  | 0.007796 | 0.006332 | 0.00476  |
| 6.98E-04 | 0.001073 | 0.002112 | 0.003552 | 0.003167 | 0.001074 | 0.003993 | 0.001186 | 8.57E-04 | 0.004798 | 2.11E-04 | 0.001523 | 0.002807 |
| 0        | 1.31E-04 | 0.00118  | 3.40E-05 | 0.001115 | 3.00E-05 | 0        | 5.40E-05 | 0.004033 | 0.001154 | 0.007499 | 8.77E-04 | 0.001526 |
| 0.003036 | 0.003961 | 0.001752 | 0.002578 | 0.001666 | 0.002283 | 0.00158  | 0.002799 | 6.46E-04 | 0.00184  | 0.001283 | 0.001883 | 0.001675 |
| 7.17E-04 | 0.001197 | 0.002456 | 6.55E-04 | 0.001412 | 6.02E-04 | 0.008046 | 9.36E-04 | 6.66E-04 | 0.001073 | 0.001535 | 0.00313  | 0.002636 |
| 3.10E-04 | 0.005323 | 0.004707 | 0.002665 | 0.022905 | 7.32E-04 | 2.25E-04 | 0.008163 | 0.003193 | 0.001983 | 0.008929 | 0.003466 | 0.00384  |
| 0        | 3.90E-05 | 0        | 4.90E-04 | 9.30E-05 | 6.40E-05 | 0        | 9.00E-05 | 0        | 7.16E-04 | 0        | 7.10E-05 | 1.40E-04 |
| 0.001358 | 2.73E-04 | 0.002547 | 0.00119  | 7.33E-04 | 5.81E-04 | 7.21E-04 | 0.001121 | 6.96E-04 | 0.005102 | 0.003715 | 0.00238  | 0.001044 |
| 1.62E-04 | 5.53E-04 | 8.87E-04 | 8.16E-04 | 8.54E-04 | 4.78E-04 | 6.00E-05 | 0.001678 | 0.003362 | 0.001236 | 4.13E-04 | 0.003978 | 6.55E-04 |
| 0.001463 | 0.002213 | 0.005792 | 0.001325 | 0.007088 | 0.001236 | 0.003351 | 0.002267 | 7.38E-04 | 4.30E-04 | 0.002171 | 0.00199  | 0.003825 |
| 4.90E-05 | 2.95E-04 | 0        | 0.002915 | 8.75E-04 | 6.70E-05 | 3.00E-05 | 0        | 7.00E-05 | 0.006889 | 1.06E-04 | 9.06E-04 | 0.001066 |
| 1.07E-04 | 7.90E-05 | 2.00E-05 | 6.32E-04 | 3.78E-04 | 3.10E-05 | 3.80E-05 | 7.50E-05 | 0        | 0.002066 | 3.80E-05 | 1.49E-04 | 3.56E-04 |
| 0.001423 | 3.64E-04 | 2.20E-04 | 3.51E-04 | 0.002276 | 2.00E-04 | 5.23E-04 | 0.001865 | 7.00E-04 | 0.00145  | 5.92E-04 | 2.22E-04 | 7.94E-04 |
| 6.40E-05 | 0.004136 | 3.88E-04 | 0.005672 | 0.001549 | 0.00258  | 0        | 6.67E-04 | 1.46E-04 | 0.002991 | 0.006506 | 0.00399  | 1.24E-04 |
| 1.24E-04 | 3.52E-04 | 9.32E-04 | 1.82E-04 | 0.004096 | 6.55E-04 | 0.0021   | 0.001382 | 0.010753 | 4.32E-04 | 0.002877 | 0.001607 | 0        |
| 0.003568 | 0.002182 | 0.004119 | 0.00521  | 8.17E-04 | 0.00334  | 8.30E-05 | 0.001476 | 4.40E-05 | 0.003443 | 0.004369 | 0.0022   | 0.001034 |
| 9.85E-04 | 0.004636 | 4.91E-04 | 0.001806 | 0.00278  | 0.001651 | 8.00E-04 | 0.001521 | 7.51E-04 | 0.001608 | 0.002096 | 0.001388 | 0.001042 |
| 2.40E-05 | 3.44E-04 | 4.30E-05 | 0        | 0.001157 | 2.09E-04 | 0        | 0        | 0        | 3.53E-04 | 3.50E-05 | 1.96E-04 | 3.98E-04 |
| 0.004952 | 2.70E-04 | 5.53E-04 | 0.001716 | 0.001151 | 0.002225 | 4.70E-05 | 4.80E-05 | 4.20E-05 | 0.008943 | 0.010357 | 0.001184 | 0.001122 |
| 3.10E-04 | 2.70E-05 | 4.35E-04 | 1.39E-04 | 8.60E-05 | 0        | 6.40E-05 | 1.51E-04 | 3.77E-04 | 1.40E-04 | 0        | 0.001259 | 0.003862 |
| 0        | 7.93E-04 | 9.50E-05 | 0        | 0.001291 | 1.61E-04 | 0        | 8.40E-05 | 2.36E-04 | 4.29E-04 | 8.20E-05 | 2.52E-04 | 0        |
| 0.001122 | 5.27E-04 | 0.009027 | 0.001946 | 0.001503 | 8.78E-04 | 0.001845 | 0.002089 | 0        | 4.39E-04 | 0.00732  | 4.09E-04 | 0.001405 |
| 1.31E-04 | 3.13E-04 | 0.003838 | 0.001282 | 0.001258 | 4.61E-04 | 2.70E-05 | 8.40E-04 | 1.36E-04 | 3.10E-05 | 5.71E-04 | 1.83E-04 | 0.001538 |
| 0        | 1.50E-05 | 0        | 2.97E-04 | 1.54E-04 | 0        | 0        | 0        | 0        | 0.001337 | 0        | 7.20E-05 | 5.30E-05 |
| 0        | 1.79E-04 | 2.50E-05 | 4.37E-04 | 3.00E-04 | 1.73E-04 | 0        | 0        | 0        | 0.003582 | 0        | 3.89E-04 | 4.28E-04 |
| 0        | 1.02E-04 | 8.20E-04 | 5.69E-04 | 7.06E-04 | 2.07E-04 | 6.40E-05 | 4.43E-04 | 0.00116  | 9.60E-05 | 0        | 0.022574 | 4.37E-04 |
| 1.05E-04 | 2.94E-04 | 0        | 2.50E-04 | 6.53E-04 | 7.70E-05 | 1.77E-04 | 5.90E-05 | 7.60E-05 | 0.00113  | 4.40E-05 | 3.03E-04 | 1.47E-04 |

|          |          |          |          |          |          |          |          |          |          |          |          |          |
|----------|----------|----------|----------|----------|----------|----------|----------|----------|----------|----------|----------|----------|
| 5.30E-05 | 1.55E-04 | 0.001308 | 6.17E-04 | 1.23E-04 | 0        | 9.30E-05 | 9.70E-04 | 7.59E-04 | 0        | 0.015602 | 3.53E-04 | 1.45E-04 |
| 2.30E-05 | 1.96E-04 | 2.70E-05 | 0        | 1.62E-04 | 0        | 0        | 0        | 0        | 6.44E-04 | 0        | 2.16E-04 | 6.20E-05 |
| 2.50E-05 | 5.90E-05 | 0        | 0.001636 | 1.36E-04 | 6.10E-05 | 0        | 2.60E-05 | 3.90E-05 | 0.001609 | 0        | 1.29E-04 | 2.00E-04 |
| 3.00E-05 | 0        | 5.60E-05 | 8.70E-05 | 5.00E-05 | 0        | 7.79E-04 | 4.70E-05 | 1.16E-04 | 0        | 0        | 2.52E-04 | 8.00E-05 |
| 0        | 2.30E-05 | 8.17E-04 | 1.15E-04 | 0        | 0        | 0        | 0        | 0        | 5.90E-05 | 0        | 3.60E-05 | 0        |
| 2.60E-05 | 1.20E-04 | 5.99E-04 | 4.78E-04 | 3.90E-04 | 0        | 3.33E-04 | 0        | 0        | 0.001401 | 3.50E-05 | 1.61E-04 | 4.75E-04 |
| 0        | 0        | 0        | 0        | 0        | 0        | 0        | 2.20E-05 | 0        | 0        | 0        | 0        | 0        |
| 0        | 9.49E-04 | 0        | 0        | 1.95E-04 | 1.68E-04 | 0        | 0        | 0        | 5.82E-04 | 4.44E-04 | 1.29E-04 | 7.44E-04 |
| 6.80E-05 | 0        | 1.21E-04 | 0        | 0        | 0        | 1.06E-04 | 6.48E-04 | 2.20E-04 | 0        | 0        | 0        | 0        |
| 6.80E-05 | 0        | 2.41E-04 | 0        | 0        | 0        | 2.14E-04 | 7.70E-05 | 1.74E-04 | 0        | 3.40E-05 | 0        | 0        |
| 2.80E-05 | 0        | 0        | 2.23E-04 | 2.61E-04 | 7.30E-05 | 0        | 5.70E-05 | 0        | 0.001387 | 0        | 9.00E-05 | 2.19E-04 |
| 0        | 2.80E-05 | 2.80E-04 | 3.20E-05 | 0        | 0        | 0        | 0        | 0        | 0        | 0        | 1.80E-05 | 0        |
| 4.20E-04 | 2.20E-05 | 9.83E-04 | 7.70E-05 | 2.10E-04 | 6.80E-05 | 0        | 7.60E-05 | 0.001105 | 3.00E-05 | 1.36E-04 | 7.60E-05 | 1.71E-04 |
| 0        | 0        | 0        | 0        | 0        | 0        | 0        | 0        | 0        | 0        | 0        | 0        | 0        |
| 0        | 8.90E-05 | 0        | 2.59E-04 | 6.70E-05 | 0        | 0        | 0        | 4.00E-05 | 8.99E-04 | 0        | 1.39E-04 | 1.67E-04 |
| 7.50E-05 | 0        | 2.40E-04 | 7.80E-05 | 0        | 1.21E-04 | 1.25E-04 | 2.15E-04 | 2.71E-04 | 0        | 4.20E-05 | 0        | 0        |
| 0        | 3.40E-05 | 4.70E-05 | 1.12E-04 | 0        | 0        | 0        | 1.11E-04 | 0        | 0        | 2.02E-04 | 5.10E-05 | 2.90E-05 |
| 0        | 0        | 6.80E-05 | 3.50E-05 | 3.11E-04 | 0        | 0        | 2.90E-05 | 0        | 0        | 0        | 4.00E-05 | 0        |
| 2.20E-05 | 6.20E-05 | 0        | 1.81E-04 | 2.24E-04 | 0        | 0        | 0        | 0        | 0.001146 | 0.001234 | 1.17E-04 | 1.62E-04 |
| 0        | 0        | 2.50E-05 | 0        | 4.25E-04 | 3.20E-05 | 0        | 1.61E-04 | 0        | 5.30E-04 | 0.002091 | 5.70E-05 | 5.17E-04 |
| 0        | 0        | 0        | 3.00E-05 | 0        | 0        | 0        | 0        | 0        | 5.10E-05 | 0        | 0        | 0        |
| 0        | 0        | 0        | 0        | 0        | 2.70E-05 | 0        | 0        | 0        | 0        | 0        | 0        | 0        |
| 0        | 0        | 0        | 0        | 0.004323 | 0        | 0        | 7.20E-05 | 0        | 0        | 1.01E-04 | 0        | 0.003987 |
| 0        | 0        | 0        | 0        | 0        | 0        | 0        | 0        | 0        | 0        | 0        | 0        | 0        |
| 0        | 9.70E-05 | 0        | 3.74E-04 | 1.04E-04 | 0        | 2.20E-05 | 0        | 0        | 5.25E-04 | 0        | 7.20E-05 | 1.08E-04 |
| 0        | 0        | 0        | 0        | 0        | 0        | 0        | 0        | 0        | 0        | 0        | 0        | 0        |
| 2.00E-05 | 6.60E-05 | 5.10E-05 | 1.47E-04 | 1.47E-04 | 0        | 1.96E-04 | 0        | 3.30E-05 | 1.86E-04 | 0        | 1.69E-04 | 2.62E-04 |
| 0        | 0        | 0        | 3.90E-05 | 0        | 0        | 3.80E-05 | 0        | 0        | 0        | 0        | 5.80E-05 | 5.60E-05 |
| 0        | 0        | 0        | 0        | 0        | 0        | 0        | 0        | 0        | 0        | 0        | 0        | 0        |
| 0        | 5.00E-05 | 0        | 0        | 0        | 0        | 0        | 0        | 0        | 0        | 0        | 0        | 0        |
| 0.007035 | 0.007528 | 0.02457  | 0.018243 | 0.014233 | 0.004834 | 0.010982 | 0.010945 | 0.004563 | 0.025631 | 0.011033 | 0.012412 | 0.012321 |



| H066     | H097     | H109     | H018     | H122     | H062     | H051     | H108     | H061     | H024     | H082     | H005     | H031     |
|----------|----------|----------|----------|----------|----------|----------|----------|----------|----------|----------|----------|----------|
| 0.115221 | 0.114119 | 0.112792 | 0.109225 | 0.10856  | 0.107937 | 0.105724 | 0.102996 | 0.102522 | 0.101634 | 0.100145 | 0.099678 | 0.098749 |
| 0.041486 | 0.369574 | 0.273048 | 0.180842 | 0.101344 | 0.188159 | 0.091425 | 0.216064 | 0.263688 | 0.488094 | 0.208525 | 0.141492 | 0.091955 |
| 0.271699 | 0.014899 | 0.075171 | 0.039825 | 0.163238 | 0.077601 | 0.092357 | 0.11903  | 0.054136 | 0.015647 | 0.028924 | 0.028297 | 0.251365 |
| 0.048202 | 0.046641 | 0.051461 | 0.052848 | 0.03138  | 0.066786 | 0.044681 | 0.04186  | 0.105453 | 0.069119 | 0.0564   | 0.068492 | 0.096348 |
| 0.017804 | 0.04029  | 0.014622 | 0.02185  | 0.014101 | 0.020617 | 0.008666 | 0.027975 | 0.017984 | 0.020667 | 0.079527 | 0.072731 | 0.039983 |
| 0.044556 | 0.062428 | 0.072965 | 0.094071 | 0.059785 | 0.063244 | 0.081098 | 0.037419 | 0.16939  | 0.001389 | 0.111256 | 0.160052 | 0.03139  |
| 0.038435 | 0.060577 | 0.116353 | 0.103394 | 0.042491 | 0.029405 | 0.153502 | 0.122985 | 0.039917 | 0.049276 | 0.120423 | 0.061586 | 0.043494 |
| 0.049485 | 0.038313 | 0.070548 | 0.149043 | 0.022354 | 0.053549 | 0.083556 | 0.05946  | 0.122167 | 0.00589  | 0.051305 | 0.030584 | 0.045058 |
| 0.063635 | 0.042847 | 0.043598 | 0.062139 | 0.301838 | 0.050045 | 0.114993 | 0.08713  | 0.002498 | 0.006826 | 0.020236 | 0.005057 | 0.029432 |
| 0.0136   | 0.018942 | 0.019252 | 0.012761 | 0.008267 | 0.030739 | 0.011648 | 0.01717  | 0.003389 | 0.006404 | 0.0163   | 0.041614 | 0.029359 |
| 0.025458 | 0.012706 | 0.008375 | 0.007906 | 0.011268 | 0.028024 | 0.005727 | 0.005344 | 0.010774 | 0.00158  | 0.004273 | 0.019938 | 0.018182 |
| 0.003104 | 0.047506 | 0.009706 | 0.026901 | 0.006803 | 0.007101 | 0.016961 | 0.014963 | 0.018145 | 0.006816 | 0.056939 | 0.06841  | 0.004573 |
| 0.005816 | 5.89E-04 | 0.013086 | 0.007835 | 0.009234 | 0.007104 | 0.007644 | 0.010689 | 0.006672 | 5.92E-04 | 0.001424 | 0.008613 | 0.016384 |
| 0.001793 | 0.009559 | 0.006195 | 0.006662 | 0.00379  | 0.005719 | 0.005796 | 0.00652  | 0.012952 | 0.004079 | 0.008725 | 0.018353 | 0.002047 |
| 0.001808 | 0.019213 | 0.004782 | 0.01878  | 0.003224 | 0.017622 | 0.007558 | 0.012669 | 4.87E-04 | 0.005678 | 0.019884 | 0.011687 | 0.002119 |
| 0.006886 | 0.002139 | 0.015574 | 0.007783 | 0.003416 | 0.026314 | 0.003367 | 0.005375 | 0.007485 | 0.004488 | 0.004061 | 0.007756 | 0.013242 |
| 0.006844 | 0.007182 | 0.002689 | 0.005479 | 0.008082 | 0.005765 | 0.012042 | 0.009979 | 0.003471 | 0.002457 | 0.010721 | 0.02308  | 0.002261 |
| 0.004003 | 0        | 4.00E-05 | 2.50E-05 | 3.08E-04 | 0.001736 | 1.06E-04 | 2.34E-04 | 0        | 0        | 4.10E-05 | 5.80E-05 | 4.01E-04 |
| 0        | 0        | 0.023669 | 1.32E-04 | 0.013505 | 0        | 3.44E-04 | 0.013993 | 0        | 0.003285 | 0        | 0        | 6.30E-05 |
| 0.002909 | 0.001465 | 0.005175 | 3.50E-05 | 0.004542 | 0.008396 | 0.004554 | 0.004812 | 1.04E-04 | 0.001068 | 8.68E-04 | 0        | 3.41E-04 |
| 0.001819 | 0.002849 | 5.73E-04 | 0.003491 | 0.001429 | 0.0025   | 0.005731 | 0.001748 | 0.007082 | 0.0019   | 0.00593  | 6.96E-04 | 0.048136 |
| 6.90E-04 | 0.012508 | 0.015659 | 0.014018 | 0.004057 | 0.00294  | 0.009507 | 0.011724 | 0.004635 | 7.11E-04 | 0.005977 | 0.001737 | 2.84E-04 |
| 0.003237 | 0.008651 | 0.001194 | 0.003629 | 0.003288 | 0.00348  | 0.00269  | 0.00391  | 0.007478 | 0.0021   | 0.0029   | 0.013451 | 0.001888 |
| 9.07E-04 | 0.002079 | 0.004953 | 0.007825 | 0.003086 | 0.007367 | 0.004835 | 0.003347 | 0.004183 | 0        | 0.006917 | 0.006354 | 0.004957 |
| 0.001157 | 0.012607 | 8.00E-05 | 0.001102 | 6.19E-04 | 0.001559 | 6.41E-04 | 0.00172  | 8.50E-05 | 0.001007 | 0.008255 | 0.002054 | 0.001023 |
| 0.012886 | 1.07E-04 | 1.33E-04 | 0.002316 | 0.001017 | 0.008673 | 0.001573 | 6.05E-04 | 2.41E-04 | 0.002343 | 4.14E-04 | 9.50E-05 | 0.001677 |
| 7.69E-04 | 0.003645 | 0.003557 | 0.002607 | 0.001598 | 0.002673 | 0.003543 | 0.002186 | 0.002581 | 0.003954 | 0.003835 | 0.023792 | 0.001722 |
| 3.23E-04 | 8.18E-04 | 0.001475 | 0.001451 | 0.003181 | 5.50E-04 | 0.001994 | 0.001184 | 0        | 0        | 8.57E-04 | 0.023427 | 0.002172 |
| 0.001408 | 3.22E-04 | 4.20E-05 | 1.37E-04 | 0.003692 | 0.004029 | 5.95E-04 | 4.00E-05 | 3.37E-04 | 4.80E-05 | 6.50E-05 | 2.52E-04 | 1.77E-04 |
| 0.002463 | 0.005428 | 0.00102  | 0.004697 | 0.002525 | 0.004923 | 0.004519 | 0.005112 | 0.005288 | 0.002827 | 0.00395  | 0.012576 | 0.004835 |
| 0.055561 | 2.31E-04 | 8.94E-04 | 0.001451 | 0.009109 | 0.047312 | 0.0019   | 0.003693 | 3.16E-04 | 3.80E-05 | 0.001051 | 4.95E-04 | 0.004006 |
| 0.001554 | 0.008595 | 1.52E-04 | 7.89E-04 | 0.00159  | 1.59E-04 | 5.81E-04 | 0.007129 | 4.00E-05 | 0.001119 | 8.39E-04 | 0.005872 | 1.37E-04 |
| 6.34E-04 | 0.001878 | 0.001715 | 0.001938 | 0.002335 | 0.001161 | 0.004264 | 0.001292 | 0.00275  | 0.001731 | 0.001844 | 0.00207  | 6.39E-04 |
| 8.85E-04 | 0.001795 | 6.79E-04 | 0.001541 | 7.32E-04 | 0.002139 | 0.002562 | 7.82E-04 | 8.88E-04 | 0.002567 | 0.001449 | 0.003801 | 0.001844 |
| 0.009009 | 0.010344 | 0.002177 | 9.10E-04 | 0.013501 | 0.004525 | 0.006023 | 0.010963 | 0        | 0.002626 | 0.002996 | 6.40E-05 | 0.003298 |
| 8.03E-04 | 0        | 0        | 1.09E-04 | 9.90E-05 | 7.01E-04 | 1.29E-04 | 2.80E-05 | 0        | 0.041313 | 0        | 2.90E-05 | 0.012711 |
| 0.00278  | 0.001365 | 0.002229 | 6.78E-04 | 0.001182 | 0.001964 | 0.003085 | 0.001501 | 0.001926 | 0        | 0.006008 | 0.017364 | 6.64E-04 |
| 0.007832 | 2.03E-04 | 0.001462 | 0.001509 | 0.001684 | 0.002698 | 6.28E-04 | 7.63E-04 | 6.70E-05 | 0.001039 | 0.013775 | 5.70E-05 | 0.005762 |
| 0.009553 | 5.32E-04 | 5.03E-04 | 0.001045 | 0.00262  | 0.00428  | 0.00591  | 0.002273 | 5.73E-04 | 3.70E-05 | 7.66E-04 | 9.02E-04 | 0.004941 |
| 0.008121 | 0        | 5.60E-05 | 0.001703 | 3.84E-04 | 0.006317 | 9.78E-04 | 4.26E-04 | 0        | 2.80E-05 | 2.55E-04 | 4.30E-05 | 5.91E-04 |
| 0.002335 | 0        | 1.83E-04 | 4.89E-04 | 8.50E-05 | 0.001655 | 3.63E-04 | 2.06E-04 | 1.38E-04 | 0.036715 | 7.80E-05 | 4.20E-05 | 0.008025 |
| 2.20E-04 | 6.66E-04 | 2.55E-04 | 4.40E-04 | 4.89E-04 | 8.34E-04 | 0.001676 | 4.83E-04 | 8.01E-04 | 6.80E-04 | 0.001617 | 9.10E-05 | 7.32E-04 |
| 8.42E-04 | 8.53E-04 | 0.003286 | 7.08E-04 | 1.05E-04 | 0.006125 | 0.00426  | 0.002589 | 4.80E-05 | 0.003691 | 2.30E-05 | 2.20E-05 | 7.42E-04 |
| 0        | 8.30E-05 | 6.33E-04 | 0.001776 | 6.70E-05 | 0        | 0.002388 | 7.60E-04 | 4.21E-04 | 9.40E-05 | 0        | 6.60E-05 | 0.005619 |
| 0        | 3.74E-04 | 0.003316 | 0.009595 | 0.001288 | 0.00179  | 0.007817 | 0.001284 | 6.77E-04 | 0        | 0.001284 | 0.001038 | 0.002459 |
| 4.62E-04 | 4.58E-04 | 7.25E-04 | 0.001564 | 0.00128  | 0.001735 | 8.84E-04 | 0.001869 | 3.76E-04 | 3.60E-05 | 8.54E-04 | 0.001799 | 0.006571 |
| 0.007863 | 0        | 2.90E-05 | 1.70E-04 | 9.21E-04 | 0.00528  | 5.04E-04 | 5.96E-04 | 0        | 0        | 1.32E-04 | 2.30E-05 | 1.28E-04 |
| 0        | 0.001358 | 0.001577 | 0.00188  | 9.15E-04 | 4.72E-04 | 0.001888 | 9.54E-04 | 0.002874 | 7.50E-05 | 0.003892 | 0.005183 | 1.28E-04 |
| 0.004165 | 0        | 3.76E-04 | 5.75E-04 | 1.48E-04 | 1.84E-04 | 3.10E-05 | 4.95E-04 | 1.43E-04 | 3.58E-04 | 0.009649 | 5.80E-05 | 3.32E-04 |
| 0        | 0        | 8.44E-04 | 5.20E-04 | 0        | 0        | 0.001631 | 2.80E-05 | 4.80E-05 | 4.80E-05 | 0        | 0        | 0.009083 |
| 0.003447 | 3.05E-04 | 0.002021 | 0        | 0.001985 | 0.001267 | 0.003426 | 1.75E-04 | 0.005024 | 1.28E-04 | 2.79E-04 | 2.43E-04 | 0.001254 |
| 0.002854 | 5.60E-05 | 6.89E-04 | 1.28E-04 | 5.09E-04 | 7.17E-04 | 0.002453 | 4.52E-04 | 4.60E-05 | 0        | 7.59E-04 | 5.87E-04 | 0.001439 |
| 0.001431 | 6.90E-05 | 0        | 1.29E-04 | 9.50E-05 | 8.34E-04 | 1.70E-04 | 3.40E-05 | 0        | 0.023709 | 1.80E-05 | 2.10E-05 | 0.006601 |
| 0.003137 | 0        | 0        | 7.91E-04 | 1.85E-04 | 0.002113 | 5.16E-04 | 5.40E-05 | 0        | 4.10E-05 | 6.40E-05 | 2.00E-05 | 2.40E-05 |
| 0        | 0        | 3.01E-04 | 0        | 3.06E-04 | 0.001055 | 1.70E-04 | 1.78E-04 | 0        | 2.05E-04 | 2.54E-04 | 9.60E-05 | 0.00118  |
| 0.007363 | 0        | 5.30E-05 | 1.23E-04 | 9.40E-04 | 0.008906 | 8.54E-04 | 2.16E-04 | 0        | 0        | 7.30E-05 | 2.30E-05 | 3.28E-04 |

|          |          |          |          |          |          |          |          |          |          |          |          |          |
|----------|----------|----------|----------|----------|----------|----------|----------|----------|----------|----------|----------|----------|
| 0.003274 | 0.003016 | 1.19E-04 | 2.76E-04 | 3.56E-04 | 4.34E-04 | 2.89E-04 | 2.06E-04 | 3.92E-04 | 5.30E-05 | 7.88E-04 | 8.40E-05 | 4.00E-05 |
| 0.006017 | 0        | 0        | 1.03E-04 | 5.83E-04 | 0.003124 | 3.35E-04 | 1.99E-04 | 0        | 0        | 3.20E-05 | 2.60E-05 | 1.70E-04 |
| 0.00161  | 0        | 6.70E-05 | 2.36E-04 | 1.43E-04 | 0.001183 | 2.35E-04 | 5.30E-05 | 0        | 3.90E-05 | 0        | 1.90E-05 | 8.30E-05 |
| 7.06E-04 | 0        | 7.70E-05 | 0        | 1.40E-05 | 3.62E-04 | 2.20E-05 | 1.13E-04 | 0        | 0        | 0.002396 | 1.09E-04 | 9.90E-05 |
| 4.88E-04 | 0        | 0        | 0        | 3.60E-05 | 1.50E-05 | 0        | 0        | 0        | 0.002836 | 0        | 0        | 4.39E-04 |
| 0.001176 | 3.30E-05 | 2.30E-05 | 3.17E-04 | 3.10E-05 | 0.001326 | 4.88E-04 | 5.80E-05 | 0        | 0.003885 | 4.20E-05 | 6.00E-05 | 4.56E-04 |
| 0        | 0        | 4.84E-04 | 0        | 0        | 0.005492 | 0.023626 | 0        | 0        | 0        | 0        | 0        | 0        |
| 0        | 0.001533 | 2.48E-04 | 0.002965 | 2.06E-04 | 9.52E-04 | 3.14E-04 | 3.24E-04 | 5.96E-04 | 0        | 5.34E-04 | 2.57E-04 | 5.30E-05 |
| 0        | 2.13E-04 | 7.30E-05 | 0        | 0        | 0        | 0        | 0        | 2.21E-04 | 0        | 0        | 3.20E-05 | 0        |
| 0        | 1.37E-04 | 8.70E-05 | 0        | 0        | 0        | 0        | 0        | 0        | 5.80E-05 | 0        | 4.90E-05 | 0        |
| 0.001129 | 3.30E-05 | 5.50E-05 | 2.65E-04 | 4.00E-05 | 0.001103 | 1.14E-04 | 8.30E-05 | 8.50E-05 | 0        | 5.10E-05 | 0        | 9.90E-05 |
| 0.002218 | 0        | 4.80E-05 | 0        | 0        | 1.89E-04 | 5.00E-05 | 3.90E-05 | 0        | 0        | 0        | 0        | 3.62E-04 |
| 6.60E-05 | 6.83E-04 | 0        | 0        | 3.02E-04 | 4.61E-04 | 1.57E-04 | 2.45E-04 | 2.56E-04 | 3.50E-05 | 0        | 1.16E-04 | 7.10E-05 |
| 0        | 0        | 0        | 0        | 0        | 0        | 0        | 0        | 0        | 0        | 0        | 0        | 0        |
| 0.00141  | 0        | 3.90E-05 | 1.69E-04 | 8.30E-05 | 9.99E-04 | 2.00E-04 | 9.40E-05 | 0        | 0        | 1.80E-05 | 0        | 1.17E-04 |
| 0        | 2.29E-04 | 1.99E-04 | 0        | 0        | 0        | 0        | 0        | 6.66E-04 | 7.00E-05 | 0        | 0        | 0        |
| 2.03E-04 | 0        | 0        | 0        | 4.60E-05 | 0        | 3.26E-04 | 3.00E-05 | 0        | 0        | 4.50E-05 | 0        | 4.28E-04 |
| 6.91E-04 | 0        | 1.13E-04 | 0        | 0        | 0        | 0        | 0        | 0        | 0        | 0        | 0        | 0.001512 |
| 0.001236 | 0        | 4.20E-05 | 3.01E-04 | 8.20E-05 | 7.99E-04 | 7.10E-04 | 5.30E-05 | 0        | 0        | 5.90E-05 | 0        | 7.00E-05 |
| 1.45E-04 | 9.00E-05 | 2.40E-04 | 4.38E-04 | 0        | 8.50E-05 | 2.43E-04 | 3.09E-04 | 0        | 0        | 2.24E-04 | 0        | 3.80E-05 |
| 0        | 0        | 0        | 0        | 0        | 0        | 0        | 0        | 0        | 0.002485 | 0        | 0        | 4.42E-04 |
| 0        | 0        | 0        | 0        | 0        | 0        | 1.40E-05 | 0        | 0        | 0.005594 | 0        | 0        | 0.003323 |
| 0        | 0        | 4.90E-04 | 0        | 0        | 1.47E-04 | 0.007358 | 5.80E-05 | 0        | 0        | 0        | 0        | 0        |
| 0        | 0        | 0        | 0        | 0        | 0        | 0        | 0        | 0        | 0        | 0        | 0        | 0        |
| 8.95E-04 | 0        | 0        | 1.37E-04 | 3.70E-05 | 4.50E-04 | 7.00E-05 | 6.20E-05 | 5.20E-05 | 0        | 0        | 0        | 4.80E-05 |
| 0        | 0        | 0        | 0        | 0        | 0        | 0        | 0        | 0        | 0        | 0        | 0        | 0        |
| 0.021236 | 0        | 0        | 5.70E-05 | 5.13E-04 | 0.001119 | 2.60E-05 | 1.02E-04 | 0        | 0        | 0        | 2.20E-05 | 2.12E-04 |
| 0        | 0        | 0        | 0        | 0        | 5.80E-05 | 0        | 7.10E-05 | 0        | 0        | 0        | 2.80E-05 | 0        |
| 0        | 0        | 0        | 0        | 0        | 0        | 0        | 0        | 0        | 2.87E-04 | 0        | 0        | 1.41E-04 |
| 0        | 0        | 0        | 0        | 0        | 0        | 0        | 0        | 0        | 0        | 0        | 0        | 0.002091 |
| 0.038246 | 0.006865 | 0.005654 | 0.015366 | 0.012952 | 0.042922 | 0.022955 | 0.010435 | 0.007432 | 0.058501 | 0.008775 | 0.007277 | 0.026851 |

| H077     | H133     | H025     | H074     | H065     | H104     | H137     | H027     | H069     | H006     | H110     | H140     | H147     |
|----------|----------|----------|----------|----------|----------|----------|----------|----------|----------|----------|----------|----------|
| 0.097801 | 0.092944 | 0.092595 | 0.089483 | 0.088621 | 0.08588  | 0.085503 | 0.085013 | 0.084965 | 0.078021 | 0.077512 | 0.076057 | 0.073384 |
| 0.495116 | 0.21314  | 0.160215 | 0.309022 | 0.073029 | 0.098438 | 0.350983 | 0.366469 | 0.415921 | 0.382606 | 0.162048 | 0.103442 | 0.37773  |
| 0.039807 | 0.202503 | 0.055223 | 0.011874 | 0.111254 | 0.096672 | 0.037609 | 0.033561 | 0.025248 | 0.028387 | 0.116819 | 0.096533 | 0.032728 |
| 0.01687  | 0.016017 | 0.067857 | 0.020917 | 0.053439 | 0.026309 | 0.033439 | 0.015456 | 0.026999 | 0.013305 | 0.055183 | 0.09961  | 0.036317 |
| 0.019537 | 0.009374 | 0.018873 | 0.027937 | 0.010873 | 0.006666 | 0.036434 | 0.009822 | 0.075699 | 0.011673 | 0.026311 | 0.006676 | 0.019448 |
| 0.081373 | 0.05541  | 0.096222 | 0.149931 | 0.059148 | 0.058386 | 0.112191 | 0.01919  | 0.03625  | 0.042147 | 0.10559  | 0.036571 | 0.130731 |
| 0.073348 | 0.027637 | 0.04863  | 0.060382 | 0.168437 | 0.108361 | 0.044827 | 0.031505 | 0.05554  | 0.021085 | 0.051491 | 0.038645 | 0.044964 |
| 0.053734 | 0.101358 | 0.117521 | 0.071728 | 0.066947 | 0.063567 | 0.076783 | 0.064683 | 0.041308 | 0.065125 | 0.077062 | 0.104756 | 0.078536 |
| 0.029425 | 0.027919 | 0.081515 | 0.063318 | 0.177592 | 0.068625 | 0.048305 | 0.035228 | 0.042929 | 0.042121 | 0.070409 | 0.161935 | 0.039712 |
| 0.010134 | 0.016262 | 0.010845 | 0.004325 | 0.017376 | 0.018219 | 0.009786 | 0.012242 | 0.006317 | 0.009089 | 0.02858  | 0.027304 | 0.014646 |
| 0.007938 | 0.039944 | 0.004813 | 0.005263 | 0.015723 | 0.010701 | 0.003636 | 0.017518 | 0.0145   | 0.017305 | 0.025443 | 0.016707 | 0.013947 |
| 0.017385 | 0.016785 | 0.016993 | 0.095851 | 0.01439  | 0.01307  | 0.047208 | 0.023206 | 0.047368 | 0.030329 | 0.022343 | 0.011444 | 0.038753 |
| 3.83E-04 | 0.019257 | 0.011349 | 0.003168 | 0.010331 | 0.072415 | 0.004126 | 0.001931 | 0.001068 | 0.002344 | 0.026617 | 0.012604 | 0.002236 |
| 0.007176 | 0.004086 | 0.008283 | 0.008803 | 0.002512 | 0.00381  | 0.010907 | 0.00295  | 0.010332 | 0.002195 | 0.005179 | 0.006805 | 0.011384 |
| 0.00362  | 0.006507 | 0.017374 | 0.009395 | 0.003097 | 0.013184 | 0.002703 | 0.002609 | 0.007596 | 0.004427 | 0.004205 | 0.003381 | 0.010698 |
| 0.003058 | 0.012988 | 0.006686 | 0.003906 | 0.009112 | 0.003399 | 0.003826 | 0.005455 | 0.003833 | 0.006988 | 0.017969 | 0.010953 | 0.00802  |
| 0.005514 | 0.002134 | 0.007672 | 0.009467 | 0.004625 | 0.002887 | 0.006231 | 0.005611 | 0.011024 | 0.008856 | 0.007848 | 0.008449 | 0.007493 |
| 0        | 5.90E-05 | 5.70E-05 | 0        | 3.68E-04 | 7.91E-04 | 0        | 1.45E-04 | 3.50E-05 | 2.42E-04 | 1.78E-04 | 0.001101 | 0        |
| 6.83E-04 | 0.001579 | 0.006096 | 0        | 3.61E-04 | 6.91E-04 | 0        | 0        | 0        | 0.105309 | 0        | 0        | 5.61E-04 |
| 0.001891 | 0.00272  | 0.003531 | 2.01E-04 | 0.005274 | 0.074675 | 0.005854 | 3.62E-04 | 0.008645 | 0        | 0.004723 | 0.011399 | 0.003306 |
| 9.53E-04 | 0.039938 | 0.003415 | 0.002886 | 0.009589 | 0.020514 | 0.005683 | 0.006879 | 4.40E-04 | 0.012704 | 0.00877  | 0.01414  | 7.93E-04 |
| 0.004855 | 0.016112 | 0.008182 | 0.008452 | 0.007141 | 0.008283 | 0.008516 | 0.034496 | 0.002927 | 0.007593 | 0.006875 | 0.00467  | 0.004181 |
| 4.60E-04 | 0.001511 | 0.006613 | 0.001235 | 0.00222  | 0.002458 | 0.00545  | 0.001212 | 0.002626 | 0.003938 | 0.003591 | 0.005851 | 0.003619 |
| 0.001845 | 0.005011 | 0.005087 | 0.002267 | 9.78E-04 | 0.002567 | 0.002125 | 7.74E-04 | 9.73E-04 | 0.003332 | 0.002552 | 0.009449 | 0.004287 |
| 3.75E-04 | 4.68E-04 | 0.001605 | 7.13E-04 | 2.43E-04 | 3.38E-04 | 0.002256 | 5.79E-04 | 0.00493  | 0.001744 | 6.91E-04 | 0.006826 | 4.06E-04 |
| 1.77E-04 | 0.003287 | 0.00108  | 7.90E-05 | 0.002186 | 0.008344 | 4.40E-05 | 0.010897 | 1.04E-04 | 0.003783 | 0.001503 | 0.002334 | 0        |
| 0.001834 | 0.002625 | 0.001763 | 0.001514 | 0.002186 | 0.003053 | 0.00302  | 0.003905 | 0.001419 | 0.001256 | 0.001177 | 0.002319 | 0.002339 |
| 2.47E-04 | 1.95E-04 | 0.002205 | 5.88E-04 | 0.001096 | 0.00423  | 0.003798 | 5.97E-04 | 2.99E-04 | 9.50E-05 | 0.00395  | 4.49E-04 | 0.001245 |
| 0        | 3.40E-05 | 8.70E-05 | 0        | 0.001456 | 0        | 0.001171 | 9.15E-04 | 2.31E-04 | 2.80E-05 | 2.87E-04 | 4.17E-04 | 4.20E-05 |
| 0.0017   | 0.002129 | 0.005385 | 0.00233  | 0.002613 | 6.56E-04 | 0.002459 | 0.004203 | 0.003782 | 0.001444 | 0.002421 | 2.85E-04 | 0.004704 |
| 1.66E-04 | 0.003458 | 6.78E-04 | 1.16E-04 | 0.009352 | 0.046399 | 5.77E-04 | 0.002288 | 2.58E-04 | 0.006147 | 0.006041 | 0.011448 | 1.82E-04 |
| 7.40E-05 | 0        | 1.82E-04 | 0        | 5.61E-04 | 1.65E-04 | 0.001433 | 8.83E-04 | 0.007314 | 3.60E-04 | 3.63E-04 | 1.35E-04 | 1.41E-04 |
| 0.002032 | 0.004179 | 0.00134  | 5.47E-04 | 3.85E-04 | 7.66E-04 | 0.003425 | 3.04E-04 | 0.001179 | 0.001987 | 8.14E-04 | 0.003078 | 0.00256  |
| 1.59E-04 | 9.30E-05 | 6.01E-04 | 5.89E-04 | 7.78E-04 | 1.84E-04 | 0.002013 | 5.94E-04 | 8.60E-05 | 9.60E-04 | 8.22E-04 | 0.001296 | 5.95E-04 |
| 0.004171 | 0.005664 | 9.74E-04 | 8.60E-04 | 0.010035 | 9.80E-04 | 0.0083   | 3.65E-04 | 0.00445  | 0.005551 | 0.009855 | 0.007848 | 0.002942 |
| 4.50E-05 | 3.41E-04 | 0.024638 | 0        | 1.39E-04 | 3.37E-04 | 0        | 0.060239 | 0        | 1.77E-04 | 2.48E-04 | 0        | 0        |
| 0.001248 | 0.001284 | 0.001311 | 0.001427 | 0.001042 | 0.001164 | 0.004074 | 4.27E-04 | 0.003641 | 9.97E-04 | 0.004799 | 0.001203 | 0.001719 |
| 8.63E-04 | 0.009263 | 2.57E-04 | 0        | 0.001861 | 9.58E-04 | 4.73E-04 | 0.001078 | 0.016582 | 0.003314 | 0.008657 | 0.004028 | 4.95E-04 |
| 5.06E-04 | 5.35E-04 | 0.006185 | 0.001766 | 0.002456 | 0.002651 | 0.001468 | 9.80E-05 | 7.27E-04 | 0.00714  | 0.001072 | 0.017371 | 0.001813 |
| 3.60E-05 | 0.001872 | 6.30E-05 | 0        | 0.001428 | 0.004394 | 0        | 0.004715 | 0        | 0.00217  | 9.47E-04 | 2.20E-05 | 4.50E-05 |
| 1.24E-04 | 2.71E-04 | 0.002426 | 9.10E-05 | 3.20E-04 | 0.001292 | 5.50E-05 | 0.032677 | 6.90E-05 | 5.67E-04 | 3.24E-04 | 3.87E-04 | 1.63E-04 |
| 0.001099 | 5.32E-04 | 4.54E-04 | 0.003256 | 8.98E-04 | 3.72E-04 | 0.001192 | 7.37E-04 | 0.010646 | 0.004744 | 3.67E-04 | 2.30E-04 | 0.001815 |
| 3.84E-04 | 0.003771 | 0.030266 | 0.003653 | 0.005437 | 0.002928 | 0.002233 | 9.72E-04 | 0.002352 | 0.001072 | 0.001573 | 0.001984 | 6.78E-04 |
| 2.20E-04 | 9.76E-04 | 5.39E-04 | 8.10E-05 | 0.001963 | 0        | 1.55E-04 | 2.70E-05 | 4.40E-05 | 7.79E-04 | 0.004494 | 2.84E-04 | 1.75E-04 |
| 0.001628 | 0.001964 | 0.006501 | 0.002869 | 0.001227 | 0.002335 | 0.002463 | 0        | 2.49E-04 | 0.004135 | 0.003786 | 0.010211 | 0.002249 |
| 9.07E-04 | 0.0029   | 0.004475 | 0.003126 | 0.010565 | 0.004642 | 6.04E-04 | 0.001425 | 0.001982 | 0.010301 | 0.004073 | 0.003061 | 4.66E-04 |
| 0        | 1.44E-04 | 3.10E-05 | 0        | 0.00137  | 0.003429 | 0        | 0.001506 | 3.50E-05 | 2.62E-04 | 8.66E-04 | 1.07E-04 | 0        |
| 0.001682 | 2.04E-04 | 0.002164 | 0.00453  | 0.001183 | 0.001392 | 0.005088 | 0        | 1.46E-04 | 2.91E-04 | 0.002321 | 0.001714 | 0.003519 |
| 0        | 0.001049 | 2.23E-04 | 0        | 4.04E-04 | 0        | 6.70E-05 | 0        | 1.56E-04 | 7.33E-04 | 0.003086 | 0.002368 | 1.48E-04 |
| 3.42E-04 | 1.01E-04 | 2.78E-04 | 9.20E-05 | 0.005478 | 4.42E-04 | 6.34E-04 | 2.45E-04 | 3.40E-05 | 1.99E-04 | 0.001188 | 3.72E-04 | 1.32E-04 |
| 0.001252 | 4.93E-04 | 0.001902 | 0.002512 | 2.91E-04 | 7.44E-04 | 9.00E-04 | 0        | 4.36E-04 | 0.003489 | 8.94E-04 | 0.011428 | 0.002439 |
| 0        | 1.03E-04 | 0.001792 | 2.61E-04 | 4.77E-04 | 6.69E-04 | 1.41E-04 | 1.20E-04 | 1.93E-04 | 0.002317 | 9.31E-04 | 0.004725 | 5.93E-04 |
| 0        | 2.99E-04 | 0.002044 | 0        | 1.58E-04 | 9.58E-04 | 0        | 0.010737 | 0        | 1.98E-04 | 2.96E-04 | 0        | 0        |
| 4.60E-05 | 9.82E-04 | 5.90E-05 | 0        | 7.22E-04 | 0.001951 | 0        | 0.001976 | 0        | 0.001325 | 3.81E-04 | 0        | 3.80E-05 |
| 4.30E-05 | 0.003425 | 9.04E-04 | 2.90E-05 | 6.60E-05 | 2.65E-04 | 5.90E-05 | 2.21E-04 | 1.53E-04 | 5.50E-04 | 5.50E-04 | 0.001965 | 7.80E-05 |
| 0        | 1.13E-04 | 3.60E-05 | 0        | 8.58E-04 | 0.003561 | 3.10E-05 | 0.002014 | 3.40E-05 | 2.97E-04 | 6.35E-04 | 3.86E-04 | 0        |

|          |          |          |          |          |          |          |          |          |          |          |          |          |
|----------|----------|----------|----------|----------|----------|----------|----------|----------|----------|----------|----------|----------|
| 1.71E-04 | 0.002152 | 1.08E-04 | 1.69E-04 | 2.93E-04 | 6.10E-05 | 0.001702 | 4.40E-05 | 3.31E-04 | 6.09E-04 | 0.001138 | 6.12E-04 | 0        |
| 0        | 5.60E-05 | 0        | 0        | 4.77E-04 | 0.002398 | 0        | 6.40E-04 | 0        | 1.25E-04 | 6.55E-04 | 5.90E-05 | 0        |
| 0        | 3.35E-04 | 2.60E-05 | 3.40E-05 | 2.61E-04 | 0.001066 | 0        | 7.22E-04 | 0        | 3.23E-04 | 2.50E-04 | 1.89E-04 | 0        |
| 5.97E-04 | 2.47E-04 | 8.30E-05 | 0        | 1.80E-05 | 0        | 0        | 0        | 2.79E-04 | 0        | 9.60E-05 | 2.66E-04 | 0        |
| 0        | 0        | 0.00154  | 0        | 9.50E-05 | 1.25E-04 | 0        | 8.93E-04 | 0        | 1.59E-04 | 0        | 0        | 0        |
| 9.40E-05 | 2.95E-04 | 2.99E-04 | 0        | 1.84E-04 | 7.26E-04 | 5.20E-05 | 0.002615 | 0        | 7.09E-04 | 8.90E-05 | 3.10E-05 | 0        |
| 0        | 0        | 0        | 0        | 0        | 0        | 0        | 0        | 0        | 0        | 0        | 0        | 0        |
| 1.38E-04 | 5.71E-04 | 0.00159  | 0.001272 | 9.80E-05 | 4.65E-04 | 1.86E-04 | 0        | 5.17E-04 | 0.00121  | 2.72E-04 | 0.001778 | 5.40E-05 |
| 1.20E-04 | 0        | 0        | 0        | 0        | 0        | 0        | 0        | 3.70E-05 | 0        | 0        | 0        | 1.72E-04 |
| 0        | 0        | 0        | 0        | 0        | 0        | 2.80E-05 | 0        | 0        | 0        | 0        | 0        | 7.00E-05 |
| 0        | 2.46E-04 | 0        | 2.80E-05 | 3.25E-04 | 0.001344 | 0        | 6.96E-04 | 0        | 4.03E-04 | 2.75E-04 | 0        | 0        |
| 3.60E-05 | 0        | 0        | 0        | 0        | 0        | 0        | 0        | 0        | 4.90E-04 | 0        | 6.24E-04 | 0        |
| 1.16E-04 | 1.49E-04 | 1.29E-04 | 0        | 1.96E-04 | 8.80E-05 | 1.06E-04 | 0        | 1.10E-04 | 0        | 0        | 3.60E-05 | 1.27E-04 |
| 0        | 0        | 0        | 0        | 0        | 0        | 0        | 0        | 0        | 0        | 0        | 0        | 0        |
| 0        | 2.19E-04 | 1.70E-05 | 0        | 9.30E-05 | 8.71E-04 | 0        | 7.72E-04 | 0        | 3.37E-04 | 1.28E-04 | 1.50E-05 | 0        |
| 6.80E-04 | 0        | 1.90E-05 | 0        | 0        | 0        | 5.80E-05 | 0        | 0        | 0        | 0        | 1.80E-05 | 4.10E-05 |
| 9.10E-05 | 0        | 4.96E-04 | 0        | 0        | 0        | 0        | 0        | 0        | 2.70E-05 | 2.07E-04 | 8.42E-04 | 1.68E-04 |
| 0        | 0        | 2.10E-05 | 0        | 0        | 0        | 0        | 0        | 0        | 0        | 1.96E-04 | 0        | 0        |
| 0        | 3.28E-04 | 2.00E-05 | 2.42E-04 | 1.58E-04 | 7.14E-04 | 0        | 5.19E-04 | 0        | 3.14E-04 | 1.22E-04 | 0        | 0        |
| 3.57E-04 | 1.45E-04 | 2.50E-05 | 1.75E-04 | 1.22E-04 | 1.85E-04 | 3.05E-04 | 3.30E-04 | 0.00922  | 0.003627 | 1.62E-04 | 5.00E-05 | 0        |
| 0        | 0        | 3.97E-04 | 0        | 0        | 0        | 0        | 0.00116  | 0        | 0        | 0        | 0        | 0        |
| 0        | 0        | 0.002719 | 0        | 0        | 0        | 0        | 0.004107 | 0        | 0        | 5.90E-05 | 0        | 0        |
| 0        | 0        | 0.004628 | 0        | 0        | 0        | 0        | 0        | 0        | 0        | 0        | 0        | 0        |
| 0        | 0        | 0        | 0        | 0        | 0        | 0        | 0        | 0        | 0        | 0        | 0        | 0        |
| 0        | 1.07E-04 | 2.20E-05 | 0        | 1.09E-04 | 2.79E-04 | 0        | 3.90E-04 | 0        | 1.21E-04 | 0        | 0        | 0        |
| 0        | 0        | 0        | 0        | 0        | 0        | 0        | 0        | 0        | 0        | 0        | 0        | 0        |
| 0        | 2.00E-05 | 2.80E-05 | 3.40E-05 | 2.46E-04 | 0.001399 | 3.00E-05 | 0        | 0        | 1.93E-04 | 3.65E-04 | 3.16E-04 | 0        |
| 0        | 0        | 1.40E-05 | 0        | 0        | 0        | 0        | 2.70E-05 | 0        | 1.21E-04 | 2.60E-05 | 0        | 0        |
| 0        | 0        | 4.30E-05 | 0        | 0        | 0        | 0        | 5.14E-04 | 0        | 0        | 0        | 0        | 0        |
| 0        | 0        | 0        | 0        | 0        | 0        | 0        | 0        | 0        | 2.40E-05 | 0        | 0        | 0        |
| 0.003334 | 0.011181 | 0.029681 | 0.007206 | 0.015654 | 0.030112 | 0.007275 | 0.06551  | 0.005432 | 0.023675 | 0.01925  | 0.028401 | 0.010173 |

| H096     | H089     | H123     | H132     | H049     | H075     | H119     | H017     | H102     | H121     | H004     | H101     | H084     |
|----------|----------|----------|----------|----------|----------|----------|----------|----------|----------|----------|----------|----------|
| 0.072433 | 0.072416 | 0.071501 | 0.070107 | 0.069697 | 0.06636  | 0.066079 | 0.059026 | 0.055598 | 0.055576 | 0.054116 | 0.049748 | 0.048347 |
| 0.23782  | 0.16138  | 0.256412 | 0.233684 | 0.27262  | 0.343847 | 0.092471 | 0.592309 | 0.100881 | 0.402911 | 0.351372 | 0.387589 | 0.285357 |
| 0.123306 | 0.013358 | 0.039892 | 0.111905 | 0.034798 | 0.077263 | 0.230215 | 0.025041 | 0.0401   | 0.027907 | 0.010797 | 0.131648 | 0.136224 |
| 0.024614 | 0.050707 | 0.021302 | 0.017111 | 0.043186 | 0.010791 | 0.027098 | 0.029099 | 0.017279 | 0.01783  | 0.009414 | 0.020369 | 0.012381 |
| 0.011879 | 0.099403 | 0.024889 | 0.007535 | 0.019741 | 0.004841 | 0.007812 | 0.013628 | 0.024857 | 0.009859 | 0.011117 | 0.003416 | 0.007271 |
| 0.079563 | 0.203273 | 0.058749 | 0.036124 | 0.098068 | 0.037117 | 0.06906  | 0.051852 | 0.135272 | 0.080173 | 0.066355 | 0.031159 | 0.066038 |
| 0.047837 | 0.056436 | 0.091529 | 0.05212  | 0.021281 | 0.029032 | 0.087334 | 0.023121 | 0.107018 | 0.042964 | 0.051414 | 0.012479 | 0.030248 |
| 0.049088 | 0.047612 | 0.028868 | 0.047049 | 0.099885 | 0.082654 | 0.075575 | 0.062966 | 0.062016 | 0.076527 | 0.075291 | 0.059184 | 0.061635 |
| 0.160343 | 0.013338 | 0.086196 | 0.164044 | 0.05661  | 0.091134 | 0.157737 | 0.037552 | 0.056766 | 0.068295 | 0.060488 | 0.09369  | 0.077833 |
| 0.008202 | 0.018772 | 0.014257 | 0.021473 | 0.013562 | 0.002203 | 0.004479 | 0.009632 | 0.006259 | 0.008452 | 0.003647 | 0.015738 | 0.006742 |
| 0.026199 | 0.004859 | 0.023917 | 0.028368 | 0.014595 | 0.01507  | 0.0033   | 0.003957 | 0.005896 | 0.004225 | 0.027764 | 0.057745 | 0.008322 |
| 0.014355 | 0.095504 | 0.040748 | 0.009352 | 0.077019 | 0.008291 | 0.010023 | 0.010632 | 0.063832 | 0.043636 | 0.035273 | 0.005362 | 0.017609 |
| 0.010681 | 8.83E-04 | 0.00437  | 0.038924 | 0.008273 | 0.02764  | 0.026033 | 0.002812 | 0.005123 | 0.003802 | 6.10E-04 | 0.024194 | 0.012869 |
| 0.003291 | 0.020938 | 0.004319 | 0.004786 | 0.008441 | 0.003056 | 0.00369  | 0.003942 | 0.006611 | 0.009905 | 0.005616 | 0.002148 | 0.001858 |
| 0.005517 | 0.019275 | 0.005714 | 0.006825 | 0.014786 | 0.003519 | 0.004417 | 0.00286  | 0.006518 | 0.005185 | 0.002272 | 0.0021   | 9.98E-04 |
| 0.0158   | 0.001638 | 0.007284 | 0.022086 | 0.008567 | 0.006197 | 0.003833 | 0.007768 | 0.003736 | 0.006442 | 0.009455 | 0.027403 | 0.003734 |
| 0.005414 | 0.012892 | 0.00982  | 0.008972 | 0.017742 | 0.002963 | 0.009404 | 0.001947 | 0.020206 | 0.003964 | 0.003876 | 0.006226 | 0.003942 |
| 5.20E-04 | 0        | 2.77E-04 | 2.93E-04 | 1.65E-04 | 0.002928 | 3.80E-04 | 4.50E-05 | 7.80E-05 | 4.80E-05 | 5.30E-05 | 1.76E-04 | 3.16E-04 |
| 8.00E-05 | 4.30E-05 | 9.60E-05 | 0        | 0        | 0        | 0        | 0        | 0.193053 | 0.046014 | 0.1433   | 0        | 1.17E-04 |
| 0.0033   | 1.71E-04 | 0.10348  | 0.038758 | 2.20E-05 | 0.071599 | 4.16E-04 | 1.04E-04 | 0.002074 | 7.10E-04 | 2.46E-04 | 0.009481 | 0.137324 |
| 0.001533 | 2.50E-04 | 0.002535 | 0.003821 | 2.79E-04 | 8.86E-04 | 0.002604 | 0.001825 | 0.001014 | 0.001406 | 0.002376 | 0.001018 | 0.003605 |
| 0.021951 | 0.011371 | 0.02254  | 6.48E-04 | 0.014143 | 0.009946 | 0.016672 | 0.002612 | 0.008626 | 0.016479 | 0.007056 | 3.00E-04 | 0.004265 |
| 0.002418 | 0.004869 | 0.003206 | 0.002462 | 0.002735 | 7.88E-04 | 0.003691 | 0.003355 | 0.0014   | 0.001955 | 0.001936 | 6.38E-04 | 0.001484 |
| 0.001022 | 0.00348  | 0.002746 | 0.001267 | 0.004427 | 9.26E-04 | 0.003455 | 0.001939 | 0.002264 | 0.001738 | 0.001464 | 0.00102  | 0.00198  |
| 0.001216 | 0.002606 | 0.002303 | 0.001016 | 0.001344 | 4.43E-04 | 0.00149  | 0.004401 | 8.12E-04 | 3.98E-04 | 2.40E-05 | 6.20E-05 | 3.28E-04 |
| 0.001015 | 1.00E-04 | 0.002233 | 3.31E-04 | 7.34E-04 | 5.85E-04 | 0.004234 | 1.90E-04 | 1.71E-04 | 0.004424 | 1.75E-04 | 0.001165 | 0.001349 |
| 0.001404 | 0.003204 | 0.002717 | 0.001574 | 0.002187 | 0.001002 | 0.002157 | 0.002618 | 9.14E-04 | 0.001585 | 0.002023 | 0.0016   | 8.90E-04 |
| 0.001986 | 0.001828 | 0.003618 | 0.002278 | 0.00322  | 6.50E-05 | 7.69E-04 | 0.001586 | 0.003831 | 0.001891 | 9.90E-05 | 2.66E-04 | 8.79E-04 |
| 0.001082 | 0.001117 | 0.001146 | 1.88E-04 | 5.00E-05 | 1.75E-04 | 3.90E-04 | 3.96E-04 | 4.13E-04 | 0        | 0        | 4.20E-05 | 7.58E-04 |
| 0.001979 | 0.004262 | 0.002322 | 5.41E-04 | 4.60E-04 | 6.20E-04 | 0.003087 | 7.83E-04 | 0.006949 | 7.94E-04 | 8.46E-04 | 9.13E-04 | 6.59E-04 |
| 0.008081 | 2.75E-04 | 0.007208 | 0.004546 | 0.003402 | 0.042935 | 0.005558 | 1.36E-04 | 0.001117 | 0.002207 | 7.12E-04 | 0.003374 | 0.006785 |
| 3.67E-04 | 0.001778 | 0.002146 | 0.004611 | 5.07E-04 | 1.72E-04 | 0.001401 | 2.75E-04 | 3.70E-05 | 1.14E-04 | 2.17E-04 | 1.36E-04 | 6.68E-04 |
| 0.001424 | 0.001729 | 0.001431 | 4.81E-04 | 0.002519 | 5.97E-04 | 0.002532 | 0.001739 | 8.98E-04 | 0.001249 | 6.90E-04 | 0.001265 | 0.001184 |
| 8.65E-04 | 0.001195 | 6.96E-04 | 0.00111  | 7.89E-04 | 7.40E-05 | 7.96E-04 | 5.11E-04 | 0.001    | 2.29E-04 | 1.90E-05 | 2.02E-04 | 3.03E-04 |
| 0.001336 | 0.001274 | 0.00719  | 0.014037 | 1.55E-04 | 0.001753 | 0.003893 | 0.003099 | 0.00627  | 0.003879 | 2.72E-04 | 0.005437 | 0.003469 |
| 3.30E-05 | 0        | 1.62E-04 | 3.40E-05 | 7.00E-05 | 5.10E-05 | 3.55E-04 | 3.10E-05 | 0        | 2.17E-04 | 2.50E-05 | 0        | 4.50E-05 |
| 0.001794 | 0.014498 | 0.002729 | 3.23E-04 | 0.006913 | 3.19E-04 | 0.002273 | 0.002306 | 0.005853 | 6.34E-04 | 1.66E-04 | 0.001255 | 0.00383  |
| 8.42E-04 | 0.00278  | 0.00531  | 0.002297 | 5.88E-04 | 0.002449 | 5.61E-04 | 0.007431 | 5.11E-04 | 5.81E-04 | 2.87E-04 | 0.004406 | 4.80E-04 |
| 0.004763 | 0.001444 | 0.001926 | 0.003467 | 0.014883 | 0.005918 | 0.003584 | 0.003968 | 0.002257 | 0.002352 | 7.44E-04 | 0.004248 | 0.00445  |
| 9.92E-04 | 4.80E-05 | 8.06E-04 | 1.59E-04 | 4.61E-04 | 4.49E-04 | 0.002152 | 3.90E-05 | 0        | 0.002194 | 1.91E-04 | 2.55E-04 | 8.56E-04 |
| 1.28E-04 | 4.00E-05 | 1.49E-04 | 3.60E-04 | 3.10E-04 | 1.04E-04 | 4.76E-04 | 1.73E-04 | 0.003724 | 3.44E-04 | 6.90E-05 | 1.61E-04 | 3.21E-04 |
| 7.86E-04 | 4.26E-04 | 0.009005 | 5.61E-04 | 5.29E-04 | 0.001578 | 3.78E-04 | 4.19E-04 | 0.001755 | 0.001549 | 0.020801 | 1.90E-05 | 7.01E-04 |
| 0.009965 | 6.10E-04 | 4.37E-04 | 0.00429  | 2.18E-04 | 0.001678 | 0.004368 | 0.00264  | 0.001368 | 0.00102  | 1.89E-04 | 5.32E-04 | 3.62E-04 |
| 0        | 1.93E-04 | 8.20E-05 | 0.004578 | 0        | 0.003023 | 0.005481 | 3.98E-04 | 5.98E-04 | 7.50E-05 | 4.70E-05 | 0.006458 | 0.017172 |
| 0.002061 | 0.002493 | 0.00174  | 0.001818 | 0.004913 | 7.18E-04 | 0.003924 | 0.002225 | 0.004626 | 0.004128 | 0.00093  | 0.001865 | 0.001246 |
| 0.002517 | 0.0015   | 0.001496 | 0.001937 | 0.001703 | 0.002708 | 0.008594 | 5.06E-04 | 0.003541 | 0.002137 | 0.003264 | 0.00116  | 0.001962 |
| 6.34E-04 | 0        | 9.59E-04 | 2.15E-04 | 2.96E-04 | 2.33E-04 | 9.50E-05 | 0        | 6.80E-05 | 0.00118  | 0        | 2.62E-04 | 5.39E-04 |
| 0.00169  | 0.009742 | 0.001521 | 1.64E-04 | 0.005827 | 3.43E-04 | 0.001617 | 6.30E-05 | 0.005522 | 0.001708 | 6.94E-04 | 9.00E-05 | 0.001424 |
| 8.30E-05 | 3.96E-04 | 1.76E-04 | 5.45E-04 | 1.29E-04 | 1.50E-05 | 2.50E-05 | 0.002078 | 9.60E-05 | 1.43E-04 | 2.20E-05 | 0        | 3.64E-04 |
| 5.70E-05 | 1.92E-04 | 8.70E-05 | 5.81E-04 | 0        | 8.80E-05 | 0        | 3.60E-04 | 0.001234 | 4.80E-05 | 1.70E-05 | 5.50E-05 | 0.002144 |
| 7.58E-04 | 0.003331 | 4.77E-04 | 9.39E-04 | 0.012799 | 0.001373 | 0.002702 | 0.001729 | 0.003408 | 0.002351 | 4.81E-04 | 0.001951 | 0.002279 |
| 0.002891 | 0.003381 | 4.26E-04 | 3.46E-04 | 4.32E-04 | 0.001023 | 6.64E-04 | 9.76E-04 | 4.82E-04 | 7.80E-05 | 4.50E-05 | 2.00E-05 | 3.85E-04 |
| 1.79E-04 | 0        | 1.47E-04 | 0        | 5.90E-05 | 1.50E-04 | 4.26E-04 | 0        | 3.90E-05 | 2.46E-04 | 8.80E-05 | 5.90E-05 | 4.10E-05 |
| 3.38E-04 | 0        | 4.00E-04 | 3.40E-05 | 1.87E-04 | 2.44E-04 | 0.00108  | 2.60E-05 | 0        | 8.49E-04 | 4.80E-05 | 4.40E-05 | 2.46E-04 |
| 0.001398 | 0.001627 | 2.80E-05 | 3.91E-04 | 9.10E-05 | 2.74E-04 | 2.09E-04 | 5.59E-04 | 2.45E-04 | 2.24E-04 | 0        | 3.40E-05 | 1.20E-05 |
| 8.04E-04 | 0        | 9.05E-04 | 5.26E-04 | 3.38E-04 | 0.002197 | 4.30E-04 | 0        | 1.06E-04 | 5.04E-04 | 1.12E-04 | 4.67E-04 | 5.08E-04 |

|          |          |          |          |          |          |          |          |          |          |          |          |          |
|----------|----------|----------|----------|----------|----------|----------|----------|----------|----------|----------|----------|----------|
| 5.27E-04 | 0.009116 | 5.71E-04 | 2.49E-04 | 0.001046 | 1.02E-04 | 7.19E-04 | 4.40E-04 | 8.38E-04 | 4.38E-04 | 3.62E-04 | 8.63E-04 | 5.50E-04 |
| 3.64E-04 | 0        | 6.41E-04 | 1.95E-04 | 3.73E-04 | 1.87E-04 | 2.15E-04 | 0        | 0        | 6.06E-04 | 0        | 1.88E-04 | 4.76E-04 |
| 1.84E-04 | 0        | 2.59E-04 | 4.40E-05 | 7.00E-05 | 1.23E-04 | 1.78E-04 | 0        | 0        | 3.34E-04 | 0        | 0        | 9.50E-05 |
| 1.24E-04 | 0        | 0        | 8.80E-05 | 4.90E-05 | 3.70E-05 | 2.08E-04 | 1.95E-04 | 3.60E-05 | 2.10E-05 | 0        | 0        | 1.37E-04 |
| 7.30E-05 | 0        | 2.70E-05 | 3.47E-04 | 0        | 4.60E-05 | 1.50E-05 | 0        | 0        | 8.00E-05 | 0        | 0        | 0        |
| 3.31E-04 | 0        | 2.49E-04 | 3.30E-05 | 0.00112  | 4.81E-04 | 7.32E-04 | 7.20E-05 | 0        | 7.08E-04 | 0        | 4.10E-05 | 3.29E-04 |
| 0        | 0        | 0        | 0.002807 | 0        | 0        | 0        | 0        | 0        | 0        | 9.89E-04 | 0        | 0        |
| 0        | 0.001232 | 1.93E-04 | 2.15E-04 | 5.36E-04 | 1.75E-04 | 5.91E-04 | 3.20E-05 | 5.81E-04 | 7.88E-04 | 8.80E-05 | 0        | 2.68E-04 |
| 0        | 0        | 0        | 0        | 0        | 0        | 0        | 2.80E-05 | 5.40E-05 | 2.00E-05 | 0        | 0        | 0        |
| 0        | 3.80E-05 | 3.30E-05 | 0        | 0        | 0        | 0        | 1.51E-04 | 0        | 4.20E-05 | 0        | 0        | 0        |
| 1.40E-04 | 0        | 1.40E-04 | 7.40E-05 | 6.80E-05 | 7.80E-05 | 3.92E-04 | 0        | 0        | 3.86E-04 | 2.10E-05 | 2.40E-05 | 6.50E-05 |
| 4.90E-05 | 0        | 0        | 0        | 0        | 0        | 0        | 0        | 0        | 0        | 0        | 0        | 0        |
| 3.76E-04 | 1.17E-04 | 1.72E-04 | 7.20E-05 | 2.57E-04 | 1.05E-04 | 4.80E-05 | 1.02E-04 | 8.12E-04 | 5.30E-05 | 1.80E-05 | 2.10E-05 | 1.72E-04 |
| 0        | 0        | 0        | 0        | 0        | 0        | 0        | 0        | 0        | 0        | 0        | 0        | 0        |
| 1.81E-04 | 0        | 2.25E-04 | 0        | 1.02E-04 | 6.00E-05 | 2.57E-04 | 0        | 0        | 1.77E-04 | 3.10E-05 | 3.10E-05 | 1.01E-04 |
| 0        | 2.80E-05 | 0        | 0        | 0        | 0        | 0        | 1.55E-04 | 1.11E-04 | 2.40E-05 | 0        | 0        | 0        |
| 0        | 3.96E-04 | 0        | 0        | 0        | 1.23E-04 | 1.70E-05 | 2.09E-04 | 0        | 0        | 0        | 0        | 2.20E-05 |
| 2.10E-05 | 1.54E-04 | 3.00E-05 | 0        | 0        | 0        | 1.85E-04 | 7.30E-05 | 0        | 0        | 0        | 0        | 0        |
| 8.40E-05 | 0.001905 | 9.90E-05 | 4.50E-05 | 7.80E-05 | 8.10E-05 | 2.49E-04 | 0        | 0        | 3.50E-04 | 1.30E-04 | 7.40E-05 | 1.66E-04 |
| 5.80E-05 | 0        | 4.89E-04 | 2.44E-04 | 9.90E-05 | 0.00547  | 0        | 0.001048 | 2.25E-04 | 0.004673 | 0.022979 | 0        | 2.72E-04 |
| 0        | 0        | 0        | 0        | 0        | 0        | 0        | 0        | 0        | 0        | 0        | 0        | 0        |
| 0        | 0        | 0        | 0        | 0        | 0        | 0        | 0        | 0        | 0        | 0        | 0        | 0        |
| 0        | 7.70E-05 | 8.40E-05 | 0        | 0        | 0.003048 | 0        | 1.35E-04 | 0        | 0.002803 | 8.84E-04 | 9.70E-05 | 0        |
| 0        | 0        | 0        | 0        | 0        | 0        | 0        | 0        | 0        | 0        | 0        | 0        | 0        |
| 6.30E-05 | 7.80E-05 | 5.20E-05 | 0        | 1.70E-05 | 3.40E-05 | 6.60E-05 | 0        | 0        | 1.43E-04 | 0        | 1.80E-05 | 1.33E-04 |
| 0        | 0        | 0        | 0        | 0        | 0        | 0        | 0        | 0        | 0        | 0        | 0        | 0        |
| 4.69E-04 | 0        | 2.12E-04 | 2.33E-04 | 1.77E-04 | 0.001246 | 1.00E-04 | 0        | 3.10E-05 | 1.59E-04 | 2.00E-05 | 9.70E-05 | 2.81E-04 |
| 0        | 0        | 0        | 7.70E-05 | 5.63E-04 | 3.20E-05 | 0        | 0        | 0        | 0        | 0        | 2.00E-05 | 0        |
| 0        | 0        | 0        | 0        | 0        | 0        | 0        | 0        | 0        | 0        | 0        | 0        | 0        |
| 0        | 0        | 0        | 0        | 0        | 0        | 4.00E-05 | 0        | 0        | 0        | 0        | 0        | 0        |
| 0.016322 | 0.011922 | 0.009899 | 0.013285 | 0.02869  | 0.016165 | 0.024509 | 0.007675 | 0.01299  | 0.01286  | 0.005873 | 0.017892 | 0.009795 |

| H068     | H087     | H033     | H149     | H052     | H063     |
|----------|----------|----------|----------|----------|----------|
| 0.043401 | 0.034027 | 0.03161  | 0.029516 | 0.023253 | 0.012352 |
| 0.169206 | 0.260711 | 0.217617 | 0.406833 | 0.410569 | 0.42904  |
| 0.036728 | 0.025662 | 0.02628  | 0.159983 | 0.021887 | 0.074793 |
| 0.020026 | 0.008026 | 0.004564 | 0.014118 | 0.040834 | 0.005208 |
| 0.01079  | 0.010431 | 0.031519 | 0.017232 | 0.014386 | 0.01926  |
| 0.062947 | 0.055917 | 0.036587 | 0.054527 | 0.003607 | 0.035331 |
| 0.072926 | 0.107158 | 0.020435 | 0.008205 | 0.048838 | 0.015144 |
| 0.065241 | 0.0631   | 0.032371 | 0.050286 | 0.030687 | 0.078526 |
| 0.027163 | 0.053166 | 0.02535  | 0.092341 | 0.10832  | 0.069864 |
| 0.003731 | 0.002491 | 0.003884 | 0.013039 | 0.004708 | 0.019458 |
| 0.00239  | 0.018537 | 0.002011 | 0.015014 | 0.005775 | 0.037003 |
| 0.010623 | 0.044709 | 0.045998 | 0.013448 | 0.165554 | 0.033818 |
| 0.005889 | 0.004801 | 0.002386 | 0.006587 | 0.004257 | 0.005704 |
| 0.003302 | 0.004287 | 0.003821 | 0.002557 | 2.87E-04 | 0.001946 |
| 0.00396  | 0.002401 | 0.002549 | 0.001069 | 0.003298 | 0.003092 |
| 0.004382 | 0.011127 | 0.001748 | 0.019426 | 0.015098 | 0.025832 |
| 0.004858 | 0.006748 | 0.006035 | 0.004916 | 0.009123 | 0.006046 |
| 2.31E-04 | 3.10E-05 | 8.90E-05 | 1.20E-04 | 3.10E-05 | 1.40E-04 |
| 0.380934 | 0.21226  | 0.115589 | 4.66E-04 | 0        | 0        |
| 0.006604 | 0.00857  | 0.025149 | 0.019295 | 0.004926 | 0.00251  |
| 0.003089 | 0.001432 | 0.002924 | 0.002238 | 0.006103 | 0.031574 |
| 0.004345 | 0.019892 | 0.006622 | 0.001606 | 0.027462 | 0.006378 |
| 0.001378 | 5.00E-04 | 5.40E-04 | 0.001529 | 4.65E-04 | 9.05E-04 |
| 0.002683 | 0.001071 | 6.28E-04 | 7.75E-04 | 1.54E-04 | 7.39E-04 |
| 2.41E-04 | 1.27E-04 | 1.97E-04 | 4.46E-04 | 9.27E-04 | 3.15E-04 |
| 0.001164 | 3.57E-04 | 0.001581 | 4.01E-04 | 0.003716 | 2.82E-04 |
| 0.001976 | 0.001312 | 8.19E-04 | 7.68E-04 | 0.002272 | 2.91E-04 |
| 8.14E-04 | 1.43E-04 | 3.59E-04 | 4.66E-04 | 1.15E-04 | 5.10E-05 |
| 1.26E-04 | 0        | 0        | 0        | 1.30E-04 | 0        |
| 0.004447 | 0.001982 | 0.004219 | 0.002154 | 0.001208 | 0.001721 |
| 0.003541 | 0.001729 | 2.41E-04 | 0.001619 | 0.002212 | 0.002943 |
| 0.001514 | 0        | 3.52E-04 | 2.41E-04 | 0        | 0        |
| 0.001241 | 2.42E-04 | 3.76E-04 | 0.001946 | 1.23E-04 | 5.31E-04 |
| 0.00154  | 5.50E-05 | 1.31E-04 | 8.90E-05 | 0        | 6.00E-05 |
| 0.002997 | 2.31E-04 | 0.004334 | 0.007299 | 0.003564 | 0.008088 |
| 5.60E-05 | 7.80E-05 | 0.134603 | 0        | 2.01E-04 | 3.80E-05 |
| 0.001791 | 3.50E-04 | 0.002997 | 0.002723 | 3.46E-04 | 0.001389 |
| 1.69E-04 | 4.44E-04 | 0.009569 | 0.001033 | 0.003825 | 0.010472 |
| 0.001605 | 5.42E-04 | 0.001231 | 0.005052 | 0.00129  | 0.001855 |
| 7.57E-04 | 2.66E-04 | 3.70E-05 | 2.80E-05 | 0.002008 | 2.08E-04 |
| 1.47E-04 | 1.70E-05 | 0.018764 | 3.40E-05 | 4.01E-04 | 1.13E-04 |
| 0.001677 | 0.001281 | 0.003482 | 0.003339 | 0.001552 | 0.021596 |
| 3.19E-04 | 0.013288 | 5.96E-04 | 9.73E-04 | 3.19E-04 | 0.003607 |
| 9.68E-04 | 0.002462 | 0.002365 | 0.00188  | 9.44E-04 | 2.50E-04 |
| 0.00339  | 0.00155  | 6.84E-04 | 0.001473 | 4.58E-04 | 0.001091 |
| 0.001352 | 0.002191 | 0.018911 | 0.003383 | 0.004174 | 0.006733 |
| 5.00E-04 | 1.61E-04 | 3.60E-05 | 0        | 0.001229 | 1.46E-04 |
| 0.001916 | 0.001565 | 0.004688 | 7.00E-04 | 0.001189 | 0.001756 |
| 0        | 6.70E-05 | 2.39E-04 | 1.20E-04 | 2.27E-04 | 2.84E-04 |
| 2.90E-05 | 2.20E-05 | 1.02E-04 | 1.31E-04 | 0.002356 | 0.004216 |
| 0.00165  | 2.38E-04 | 0.001445 | 0.003517 | 0.001511 | 0.001418 |
| 6.17E-04 | 3.97E-04 | 2.89E-04 | 7.03E-04 | 1.90E-04 | 0        |
| 2.80E-05 | 2.80E-05 | 0.012485 | 8.70E-05 | 3.84E-04 | 1.05E-04 |
| 3.20E-04 | 1.57E-04 | 4.40E-05 | 0        | 8.07E-04 | 2.90E-05 |
| 2.62E-04 | 8.80E-05 | 1.60E-04 | 3.00E-04 | 4.17E-04 | 5.28E-04 |
| 4.72E-04 | 9.30E-05 | 0        | 9.70E-05 | 0.001157 | 2.28E-04 |

|          |          |          |          |          |          |
|----------|----------|----------|----------|----------|----------|
| 0.003429 | 0.001014 | 0.002123 | 0.004603 | 8.50E-05 | 1.09E-04 |
| 3.43E-04 | 1.91E-04 | 0        | 0        | 7.85E-04 | 6.70E-05 |
| 1.07E-04 | 1.01E-04 | 0        | 0        | 2.77E-04 | 7.70E-05 |
| 0        | 0        | 0        | 0        | 1.71E-04 | 4.80E-05 |
| 6.50E-05 | 0        | 0.041245 | 0        | 3.80E-05 | 1.80E-05 |
| 1.58E-04 | 2.40E-05 | 0.001851 | 4.36E-04 | 3.08E-04 | 2.00E-05 |
| 3.13E-04 | 0        | 0        | 0        | 4.70E-05 | 0        |
| 1.20E-04 | 5.62E-04 | 0        | 1.21E-04 | 0        | 3.36E-04 |
| 0        | 0        | 0        | 2.41E-04 | 0        | 0        |
| 0        | 0        | 0        | 1.80E-04 | 0        | 0        |
| 1.06E-04 | 5.50E-05 | 0        | 0        | 4.74E-04 | 4.20E-05 |
| 0        | 0        | 0        | 0        | 0        | 0        |
| 2.27E-04 | 0        | 0        | 0        | 1.80E-05 | 4.10E-05 |
| 0        | 0        | 0        | 0        | 0        | 0        |
| 1.20E-04 | 0        | 4.20E-05 | 0        | 2.90E-04 | 4.60E-05 |
| 0        | 0        | 8.70E-05 | 0.001006 | 0        | 0        |
| 1.70E-05 | 0        | 0        | 0        | 4.40E-05 | 0        |
| 0        | 1.80E-05 | 0        | 3.10E-05 | 0        | 0        |
| 0.001233 | 2.51E-04 | 2.38E-04 | 0        | 2.21E-04 | 1.97E-04 |
| 4.38E-04 | 0.003954 | 0.006509 | 5.97E-04 | 2.27E-04 | 0.00352  |
| 0        | 0        | 0.008708 | 0        | 0        | 0        |
| 0        | 0        | 0.007717 | 0        | 0        | 0        |
| 3.41E-04 | 0        | 0        | 8.06E-04 | 4.20E-05 | 0        |
| 0        | 0        | 0        | 0        | 0        | 0        |
| 2.30E-05 | 6.00E-05 | 0        | 0        | 2.87E-04 | 2.80E-05 |
| 0        | 0        | 0        | 0        | 0        | 0        |
| 2.75E-04 | 7.10E-05 | 4.40E-05 | 8.60E-05 | 6.80E-05 | 1.29E-04 |
| 0        | 2.30E-05 | 0        | 3.40E-05 | 0        | 2.55E-04 |
| 0        | 0        | 1.56E-04 | 0        | 0        | 0        |
| 0        | 0        | 0        | 0        | 0        | 0        |
| 0.008232 | 0.005158 | 0.059638 | 0.015731 | 0.007744 | 0.01006  |



Supplementary table S14. The relative abundance and distribution of the key 58 OTUs among CC (n=73), SC (n=36), and H (n=140) groups.

|                                          | CC01        | CC02        | CC03        | CC04        | CC05        | CC06        | CC07        | CC08        |
|------------------------------------------|-------------|-------------|-------------|-------------|-------------|-------------|-------------|-------------|
| OTU44 (Pseudomonas)                      | 0           | 0           | 0.000263225 | 0           | 0           | 0           | 0           | 0           |
| OTU153 (Acinetobacter)                   | 0           | 0           | 0.000268386 | 0           | 0           | 0           | 0           | 0           |
| OTU92 (Faecalibacterium)                 | 0           | 0.000377119 | 0.000593547 | 9.47E-05    | 0           | 0           | 0           | 0           |
| OTU132 (Bacteroides)                     | 0           | 0           | 0.000252903 | 0           | 0           | 5.48E-05    | 0           | 0           |
| OTU146 ([Eubacterium]_ruminantium_group) | 0           | 0           | 0           | 0           | 0           | 0           | 0           | 0           |
| OTU234 (Prevotella)                      | 0           | 0.000135376 | 0           | 0           | 0           | 0           | 0           | 0           |
| OTU99 (Prevotella)                       | 0           | 0           | 6.45E-05    | 0           | 0           | 0           | 0           | 0           |
| OTU80 (Fusicatenibacter)                 | 0           | 0           | 0           | 0           | 0           | 0           | 0           | 0           |
| OTU208 (Bacteroides)                     | 0           | 0           | 5.16E-05    | 0           | 0           | 0           | 0           | 0           |
| OTU33 (Rothia)                           | 0.010236177 | 0.000161162 | 0           | 0.002020245 | 0           | 0.000421329 | 0           | 0           |
| OTU114 (Prevotella)                      | 0           | 0           | 0.000105806 | 0           | 6.04E-05    | 0.002220406 | 0           | 0           |
| OTU86 (Corynebacterium)                  | 0           | 0           | 0           | 0           | 0           | 0           | 0           | 0           |
| OTU2 (Fusobacterium)                     | 0.01513093  | 0.088316728 | 0.018245114 | 0.255122512 | 0.000142549 | 4.63E-05    | 0.013740028 | 0.001148018 |
| OTU5 (Haemophilus)                       | 0.0155776   | 0.000248189 | 0.258598042 | 0.017817434 | 0.001935283 | 5.48E-05    | 0.002196152 | 0.001071483 |
| OTU26 (Prevotella)                       | 0.007128101 | 0.001028213 | 0.000611611 | 0.001197767 | 0.000604021 | 0           | 0.001576725 | 0.003979795 |
| OTU65 (Alloprevotella)                   | 0           | 0           | 0           | 0           | 0           | 0           | 0.000638198 | 0           |
| OTU48 (g__Absconditabacteriales_)        | 0           | 0           | 0           | 0           | 0           | 5.06E-05    | 0           | 0           |
| OTU53 (g__Absconditabacteriales_)        | 0           | 0           | 0           | 0           | 0.015876084 | 0           | 0           | 0           |
| OTU78 (Saccharimonadales)                | 0           | 0           | 0           | 0           | 0           | 0           | 0           | 0           |
| OTU12 (Alloprevotella)                   | 0           | 0.034572454 | 0           | 0.000327939 | 0.00589766  | 0.008658319 | 0           | 0           |
| OTU84 (Alloprevotella)                   | 0           | 0.000441584 | 0           | 0           | 0           | 0.001377747 | 0.000732051 | 0           |
| OTU54 (Alloprevotella)                   | 0           | 0.013079901 | 0           | 0           | 0.007506771 | 0.000615141 | 0           | 0           |
| OTU308 (Alloprevotella)                  | 0           | 6.45E-05    | 0           | 5.44E-05    | 0           | 0           | 0           | 0           |
| OTU35 (Actinobacillus)                   | 0           | 0           | 0           | 0           | 0           | 0           | 0           | 0           |
| OTU77 (Haemophilus)                      | 0           | 0           | 0           | 0           | 0           | 0           | 0           | 0           |
| OTU42 (Haemophilus)                      | 0           | 0           | 0           | 0           | 0           | 0           | 0           | 0           |
| OTU46 (Campylobacter)                    | 0           | 0           | 0.01697544  | 5.26E-05    | 0           | 0.000311784 | 0.000769592 | 0           |
| OTU367 (Fusobacterium)                   | 0           | 0.00849001  | 0.001607738 | 0.016765224 | 0.000200535 | 0           | 0.001482872 | 0.003444053 |
| OTU63 (Porphyromonas)                    | 0           | 6.12E-05    | 0.000129032 | 0.000324432 | 0.005972558 | 0           | 0           | 0           |
| OTU37 (Porphyromonas)                    | 0           | 6.45E-05    | 0.026712189 | 0           | 0           | 0           | 0           | 0           |
| OTU126 (Prevotella)                      | 0           | 0           | 0           | 0           | 0           | 0.000117972 | 0           | 0.001186285 |
| OTU38 (Leptotrichia)                     | 0           | 0.000415798 | 0.002559993 | 0.086667088 | 0.044383452 | 0.005211844 | 0.029300798 | 0.006237563 |
| OTU218 (Leptotrichia)                    | 0           | 0.000731675 | 0.000621934 | 0.030186171 | 0.006470271 | 0.002304672 | 0.002214923 | 0.001989897 |
| OTU55 (Capnocytophaga)                   | 0           | 0           | 0.00084903  | 0           | 0           | 0           | 0           | 0           |
| OTU34 (Capnocytophaga)                   | 0.002493905 | 0.000103144 | 0.002265801 | 0.000592745 | 0           | 0           | 0           | 0           |
| OTU256 (Capnocytophaga)                  | 0           | 0           | 0.000129032 | 0.000105221 | 0           | 0           | 0           | 0           |
| OTU104 (Capnocytophaga)                  | 0           | 0           | 0           | 0           | 0           | 0           | 0           | 0           |
| OTU608 (Capnocytophaga)                  | 0           | 0           | 0           | 0           | 7.25E-05    | 0           | 0           | 0           |
| OTU15 (Halomonas)                        | 0.00241946  | 0.013660084 | 0.085677198 | 0           | 0.000142549 | 0           | 0           | 0.001033216 |
| OTU82 (Pelagibacterium)                  | 0           | 0.001595503 | 0.005919985 | 0           | 0           | 0           | 0           | 0           |
| OTU9 (Gemella)                           | 0           | 7.41E-05    | 0.119493885 | 0.03449322  | 0.000906031 | 0.011645544 | 0.000581886 | 0.003711924 |
| OTU1 (Streptococcus)                     | 0.038115799 | 0.091527074 | 0.322716587 | 0.311550818 | 0.045603574 | 0.203813874 | 0.0229939   | 0.00390326  |
| OTU70 (Streptococcus)                    | 0.010161732 | 0.006481932 | 0.130851275 | 0.098194056 | 0.004001034 | 0.149647769 | 0.001595495 | 0.001913363 |
| OTU728 (Leptotrichia)                    | 0.002549739 | 0           | 0           | 0.001660739 | 0.000314091 | 0.000282291 | 0.062580948 | 0.023955304 |
| OTU444 (Leptotrichia)                    | 0           | 0           | 0.000539353 | 0.000201674 | 0           | 0.000134825 | 0.145565462 | 0.03964488  |
| OTU1106 (Leptotrichia)                   | 0           | 0           | 0           | 0           | 0           | 0           | 0.025978414 | 0.006314098 |
| OTU633 (Rothia)                          | 0.007072267 | 0.001814683 | 5.94E-05    | 5.26E-05    | 0           | 0.000164318 | 0.138094791 | 0.007155977 |
| OTU644 (Rothia)                          | 0           | 0.003854993 | 0           | 5.79E-05    | 0.00022228  | 0.001289268 | 0.082008447 | 0.001186285 |
| OTU939 (Actinomyces)                     | 0.020137351 | 0.000937962 | 0           | 0           | 8.94E-05    | 0.000501382 | 0.183256687 | 0.030728609 |
| OTU892 (Streptococcus)                   | 0.010068675 | 0.00134409  | 0           | 0.005115498 | 0.001401328 | 0.004457665 | 0.012576255 | 0.011480178 |
| OTU626 (Actinobacteria_unclassified)     | 0.005043643 | 7.09E-05    | 0           | 0           | 0           | 8.85E-05    | 0.029000469 | 0.010714832 |
| OTU934 (Actinomyces)                     | 0.015261209 | 0           | 0           | 0           | 0           | 4.63E-05    | 0.186804317 | 0.410607684 |
| OTU761 (Prevotella)                      | 0.077404106 | 0.001740549 | 0           | 0.000308648 | 0.001140391 | 0.002186699 | 0.00352886  | 0.010446962 |
| OTU21 (Campylobacter)                    | 0.027972679 | 0.00374218  | 0.000748385 | 0.002374489 | 0.008565016 | 0.001154442 | 0.00213984  | 0.004936476 |
| OTU3 (Prevotella)                        | 0.689024958 | 0.484475273 | 0.001651609 | 0.113961433 | 0.60536902  | 0.350112074 | 0.008390427 | 0.060653605 |
| OTU11 (TM7x)                             | 0.002624183 | 0           | 0.000492902 | 0.001736148 | 0.175388325 | 0.184828772 | 0.016593149 | 0.017105465 |
| OTU16 (Lachnoanaerobaculum)              | 0.041577488 | 0.229745977 | 0.000867095 | 0.015453468 | 0.064934657 | 0.062112377 | 0.024289066 | 0.303650696 |
| OTU23 (Solobacterium)                    | 0           | 0.010643133 | 7.74E-05    | 0.003510876 | 0.002800241 | 0.00608821  | 0.001370249 | 0.031800092 |

| CC09        | CC10        | CC11        | CC12        | CC13        | CC15        | CC16        | CC17        | CC18        | CC19        | CC20        |
|-------------|-------------|-------------|-------------|-------------|-------------|-------------|-------------|-------------|-------------|-------------|
| 0           | 0.000184559 | 9.43E-05    | 6.05E-05    | 0           | 0           | 8.65E-05    | 0           | 8.17E-05    | 0           | 0.001353722 |
| 0           | 0.001139651 | 0           | 2.45E-05    | 0           | 0           | 1.98E-05    | 0.000134598 | 3.39E-05    | 0           | 0           |
| 0           | 0.001462629 | 8.60E-05    | 0           | 0.000396042 | 0.000309862 | 0.001878765 | 0.096742064 | 1.79E-05    | 0           | 0.001308091 |
| 0           | 0.000908952 | 0.00010544  | 0           | 0           | 0.000357015 | 0.001758077 | 0.093949162 | 1.79E-05    | 0           | 0.000187594 |
| 0           | 0           | 0           | 0           | 0.000696488 | 0           | 0           | 0.001655551 | 0           | 0           | 0           |
| 0           | 0.0011558   | 0           | 0           | 0.000389214 | 0           | 0.001959824 | 0.098444724 | 0           | 0           | 0.000598274 |
| 0           | 6.00E-05    | 0           | 0           | 0           | 0           | 0.000491757 | 0.021360648 | 0           | 0           | 0.000152104 |
| 0           | 6.46E-05    | 0           | 0           | 0           | 0           | 0.000443122 | 0.013809719 | 0           | 0           | 0.000314347 |
| 0           | 0           | 0           | 0           | 0           | 0           | 0.000180131 | 0.005592533 | 0           | 0           | 0           |
| 0           | 0.040443772 | 0.058604979 | 0           | 0.000334587 | 0.007160515 | 0.003946667 | 0.000652799 | 0.092904062 | 0.000106416 | 0.010961599 |
| 7.12E-05    | 6.46E-05    | 8.32E-05    | 0           | 0.000587235 | 0           | 0.00020715  | 0.018217792 | 0.002463992 | 0           | 0           |
| 0           | 0           | 0           | 0           | 0           | 0           | 0.003195521 | 0           | 0.001477199 | 0           | 0           |
| 0.193398815 | 0.001688714 | 0.000110989 | 2.96E-05    | 0           | 0.000579308 | 0.010887108 | 0.008163348 | 0.004479442 | 0.000933957 | 0.014525893 |
| 0.003894938 | 0.011793313 | 0.000427308 | 0.08144092  | 0.038504872 | 0.00029639  | 0.010303484 | 0.020041591 | 0.002115126 | 0.000105164 | 0.000557713 |
| 0.001090858 | 0.114228106 | 0.005738132 | 0           | 0.012523131 | 0.651667531 | 0.00057822  | 0.007840313 | 0.000147521 | 0           | 0.021071418 |
| 0           | 0.002922951 | 0.000116538 | 0           | 0.00194607  | 0           | 0.000363864 | 0           | 0           | 0           | 0.000532363 |
| 0           | 0           | 0           | 0           | 0           | 0           | 0           | 0           | 3.99E-06    | 0           | 0           |
| 9.19E-05    | 0.000625193 | 0           | 0           | 0           | 0           | 0           | 0           | 0           | 0           | 0           |
| 0           | 0           | 0           | 0           | 0           | 0           | 0           | 0           | 0           | 0           | 0           |
| 0.001853311 | 0.051810292 | 0.00010544  | 0           | 0           | 0.000377224 | 0.000543995 | 0.00055185  | 0.00031697  | 0           | 0.002317045 |
| 0           | 5.77E-05    | 0           | 0           | 0           | 0           | 4.32E-05    | 0.000538391 | 0.000456516 | 0           | 0           |
| 0           | 0.005022309 | 0           | 5.54E-05    | 0.000327759 | 0           | 9.19E-05    | 0.003122666 | 0.000717668 | 0           | 0.000278857 |
| 0           | 6.23E-05    | 0           | 0           | 0           | 0           | 0           | 0           | 0           | 0           | 0           |
| 7.35E-05    | 0           | 0           | 0           | 0           | 0           | 2.70E-05    | 0           | 0           | 0           | 0           |
| 0           | 0           | 0           | 0           | 0           | 0           | 0           | 0           | 0           | 0           | 0           |
| 0           | 0           | 0           | 0           | 0           | 0           | 0           | 0           | 0           | 0           | 0           |
| 0.003522898 | 0.000161489 | 0           | 0           | 0.000327759 | 0           | 0.016019036 | 0.015721006 | 0.002834787 | 0.000519561 | 8.62E-05    |
| 0.012665437 | 0.00325285  | 0.00019978  | 0           | 0           | 0           | 0.00195442  | 0.027437732 | 0.025114378 | 8.76E-05    | 0.001510896 |
| 0.00235855  | 0.000768226 | 0.000110989 | 2.96E-05    | 0           | 0           | 0.00253264  | 0.003762004 | 0.000386743 | 0           | 0.000172384 |
| 0           | 0           | 0           | 0           | 0.000355072 | 0           | 0.000581823 | 0           | 0.000524296 | 0           | 0           |
| 0           | 0.000392188 | 0.000332967 | 0           | 0.001925585 | 0           | 0.000724126 | 0.009852548 | 0.009267879 | 0           | 0           |
| 0.137434348 | 0.00192864  | 0.000124863 | 0           | 0.001754877 | 0           | 0.004396994 | 0.030573857 | 0           | 0.004107658 | 0.22439336  |
| 0.031315667 | 0.00604661  | 0.000640962 | 0           | 0.001727564 | 0           | 0.00235431  | 0.011386962 | 0           | 0.00042316  | 0.094268737 |
| 0.055231871 | 0.000569826 | 0           | 0           | 0.003619007 | 0           | 0.000861025 | 0           | 0.005697483 | 0           | 0.000106473 |
| 0           | 0.035580645 | 0.013973518 | 0           | 0           | 0           | 0           | 0.000114408 | 0.003600299 | 0           | 0.001409493 |
| 0           | 0.004459404 | 0.004997281 | 0           | 0           | 0           | 0           | 0           | 0.000474458 | 0           | 0.000223085 |
| 0           | 0.001402647 | 0           | 0           | 0           | 0           | 0           | 0           | 0           | 0           | 0           |
| 6.89E-05    | 0           | 0           | 0           | 0           | 0           | 0           | 0           | 0.00116621  | 0           | 0           |
| 0.006924079 | 0.433344253 | 0.002158737 | 0.000320588 | 0.011150639 | 0           | 0.048105744 | 0.067285367 | 0.01352604  | 0.000110172 | 0.098806494 |
| 0.001173534 | 0.032689992 | 0.000113764 | 6.31E-05    | 0           | 0           | 0.002507421 | 0.003075556 | 0.000759532 | 0           | 0.01313161  |
| 0.013023698 | 0           | 6.10E-05    | 0           | 0           | 0.042134548 | 0.183983846 | 0.019664717 | 0.219532519 | 0.000316744 | 9.13E-05    |
| 0.043733077 | 0.10144971  | 0.434136339 | 0.864615333 | 0.368988522 | 0.184395061 | 0.562523417 | 0.081034518 | 0.349209071 | 0.000411893 | 0.125460113 |
| 0.006999865 | 0.090069348 | 0.35222644  | 0.052080732 | 0.210974469 | 0.043677123 | 0.119866271 | 0.040419675 | 0.236971842 | 0.000195305 | 0.042370991 |
| 0.025989982 | 0           | 0           | 0           | 0           | 0           | 0.000160316 | 0.001857448 | 0           | 0.001030357 | 0.003680907 |
| 0.045088038 | 0           | 0           | 0           | 0           | 0           | 0.000387281 | 0.001527683 | 0           | 0.000296713 | 0           |
| 0.000422564 | 0           | 0           | 0.000697826 | 0.000396042 | 0           | 0           | 0.000100948 | 9.97E-06    | 0           | 0           |
| 0           | 0           | 0.039969922 | 1.80E-05    | 0.001147157 | 0.000491738 | 0           | 0           | 0.001794169 | 0           | 0.006144985 |
| 0           | 0           | 0.025632915 | 3.22E-05    | 0           | 0.001097991 | 0           | 0           | 0.001255918 | 0           | 0.028433232 |
| 8.73E-05    | 5.08E-05    | 0.010319204 | 2.70E-05    | 0.003277592 | 0.002081467 | 0           | 0.000444172 | 7.77E-05    | 0           | 0.000730097 |
| 0.002066889 | 0           | 0.029406542 | 0           | 0.07228455  | 0.001178824 | 0           | 0.000969103 | 0.001411413 | 0           | 0.000324488 |
| 0           | 0           | 0.001492802 | 0.000153213 | 0.001331522 | 0.00017514  | 0           | 0           | 0.000911039 | 0           | 0.002276484 |
| 0.00012631  | 0           | 0           | 0           | 0           | 0           | 0           | 0           | 3.59E-05    | 0           | 0.010637111 |
| 0.00074408  | 0           | 0.001670385 | 0           | 0.0236328   | 0           | 0           | 0.000316304 | 4.39E-05    | 0.003719553 | 0           |
| 0.000215875 | 0.017756871 | 0.000291346 | 0           | 0.00251282  | 0.049288327 | 0.001435643 | 0.078423323 | 0.001138301 | 0.000857588 | 0.002494499 |
| 0.085325776 | 0.031644927 | 0.01637643  | 0.00012875  | 0.226891273 | 0           | 0.010694368 | 0.079203989 | 0.005117369 | 0.986587827 | 0.104865287 |
| 0.033334329 | 0.000163796 | 0           | 0.000145488 | 0           | 0           | 0.000113482 | 0.023850704 | 0.002392225 | 0           | 0.09398481  |
| 0.284498102 | 0.003675029 | 0.000183132 | 4.12E-05    | 0.003106884 | 0           | 0.003409877 | 0.07631014  | 0.010172938 | 8.89E-05    | 0.012148007 |
| 0.007174402 | 0.000897418 | 0.000108214 | 3.61E-05    | 0.008890467 | 0.014731935 | 0.000381877 | 0.035850085 | 0.001339646 | 0.000101408 | 0.078089984 |

| CC21        | CC22        | CC23        | CC24        | CC25        | CC26        | CC27        | CC28        | CC29        | CC30        | CC31        |
|-------------|-------------|-------------|-------------|-------------|-------------|-------------|-------------|-------------|-------------|-------------|
| 6.73E-05    | 0           | 0           | 0           | 0           | 0           | 0           | 0           | 0           | 0           | 0           |
| 0.000173536 | 0           | 0           | 0           | 0           | 0           | 0           | 0           | 0           | 0           | 0           |
| 3.01E-05    | 0           | 0           | 0           | 0           | 0           | 0           | 0           | 0.000366207 | 0           | 0           |
| 0           | 0           | 0           | 0           | 0           | 0           | 2.49E-05    | 0           | 0           | 0           | 0           |
| 0           | 0           | 0           | 0           | 0           | 0           | 0           | 0           | 0           | 0           | 0           |
| 4.43E-05    | 0           | 0           | 0           | 0           | 0           | 3.58E-05    | 0           | 0           | 0           | 0           |
| 0           | 0           | 0           | 4.57E-05    | 0           | 0           | 0           | 0           | 0           | 0           | 0           |
| 0           | 0           | 0           | 0           | 0           | 0           | 0           | 0           | 0           | 0           | 0           |
| 0           | 0           | 0           | 0           | 0           | 0           | 0           | 0           | 0           | 0           | 0           |
| 0.007410713 | 0.000414516 | 0           | 0.00105789  | 0.002444566 | 0.001287931 | 0.011078767 | 0.012350887 | 0.009258477 | 0.00060917  | 0           |
| 0           | 0           | 0.000232439 | 0           | 0           | 0           | 5.92E-05    | 0           | 0           | 0           | 0           |
| 0.000178849 | 0           | 0           | 0.000164737 | 0           | 0           | 0.000322229 | 0.000290136 | 7.51E-05    | 0           | 0           |
| 0.077259116 | 0.002027295 | 0.17497341  | 0.086544549 | 0.092090686 | 0.004321999 | 0.050649128 | 0.005588475 | 0.01684085  | 0.014329745 | 0.20128204  |
| 0.12291867  | 0.005392188 | 0.001014277 | 0.002997025 | 0.011929802 | 0.023347878 | 0.012465753 | 0.00619553  | 0.003981333 | 0.011037636 | 0.001004818 |
| 0.00488204  | 0.007422966 | 0.001944032 | 0.001395304 | 0.004764695 | 0.000100448 | 0.003086862 | 0.000252196 | 0.003934383 | 0.001163903 | 0.000506895 |
| 0.001841611 | 0           | 0           | 0.000256037 | 0.000477674 | 0           | 8.25E-05    | 0           | 0           | 0           | 0           |
| 0.000906639 | 0           | 0           | 0.00147271  | 0.000939291 | 0           | 0.000759651 | 0.000116055 | 0           | 0.000329211 | 0.000264662 |
| 0.000116871 | 0           | 0           | 3.37E-05    | 0           | 0.000107328 | 0.002436177 | 0.001057882 | 0           | 0.000111465 | 0           |
| 0           | 0           | 0           | 0           | 0           | 0           | 0.001788605 | 0           | 0           | 0.000629907 | 0           |
| 0.001058926 | 0.001313214 | 0.000799448 | 0.007290114 | 0.00096739  | 0.000191263 | 0.001014944 | 0           | 0.018836211 | 0.006291297 | 0.001552085 |
| 0           | 0           | 0           | 3.57E-05    | 0           | 0           | 5.14E-05    | 0           | 0           | 0           | 0           |
| 0           | 0.000400582 | 0           | 0.000867351 | 0.001011544 | 4.54E-05    | 0.001000934 | 0           | 0           | 0.003382836 | 0.000542781 |
| 0           | 0           | 0           | 0           | 0           | 0           | 0.00010274  | 0           | 0           | 0.00011665  | 0           |
| 0.029311716 | 0           | 0           | 4.17E-05    | 0           | 0           | 0.000488792 | 0.000131677 | 8.92E-05    | 0           | 0           |
| 0.001947858 | 0           | 0           | 0           | 0           | 0.001742009 | 0.000797011 | 0.000535637 | 5.16E-05    | 0           | 0           |
| 0.000579045 | 0           | 0           | 0           | 0           | 5.78E-05    | 0.000677148 | 0           | 0           | 0           | 0           |
| 4.96E-05    | 0           | 0.000387398 | 0.007220647 | 0.001433021 | 0.000473342 | 0.00501401  | 0.000120518 | 0.000450717 | 0.001767888 | 0.000228775 |
| 0.007803826 | 0.000456316 | 0.009913857 | 0.010340728 | 0.008176651 | 0.000302719 | 0.010622665 | 0.004550679 | 0.001910852 | 0.001088729 | 0.06620134  |
| 0           | 0           | 0.002148296 | 0.004592792 | 0.004853005 | 0.000100448 | 0.001667186 | 0.002769687 | 0.000530531 | 0.000557325 | 0.0056521   |
| 0           | 0           | 0           | 3.97E-05    | 0           | 0           | 0.001640722 | 0           | 0           | 0           | 0.000278119 |
| 0           | 0           | 0           | 0           | 0           | 0.00011008  | 0.001720112 | 0           | 9.39E-05    | 0           | 0           |
| 0.044687395 | 0.024017528 | 0.022528932 | 0.104367916 | 0.272960453 | 0.003801873 | 0.042868929 | 0.027161238 | 0.021592158 | 0.336707529 | 0.037904955 |
| 0.027188551 | 0.003702775 | 0.001088235 | 0.007030107 | 0.092985822 | 0.001201243 | 0.005470112 | 0.004209211 | 0.003075204 | 0.008543929 | 0.001166306 |
| 0.000672896 | 0.000417999 | 0           | 0           | 0           | 0           | 0.000185243 | 0.000205327 | 9.39E-05    | 0.003144352 | 0           |
| 0.005600976 | 0           | 0.000250048 | 0.000537877 | 0.002392383 | 5.37E-05    | 0.001636052 | 0.000406191 | 0           | 0.001560511 | 0           |
| 0.000805705 | 0           | 0           | 0           | 0           | 0           | 0.000241283 | 0           | 5.63E-05    | 0           | 0           |
| 0.000200098 | 0           | 0           | 0           | 0           | 0           | 0           | 0           | 0           | 0           | 0           |
| 0           | 0           | 0           | 3.18E-05    | 0.001457106 | 0           | 2.18E-05    | 0.000419582 | 0           | 0.000168494 | 0           |
| 0.12623534  | 0           | 0           | 0.000335429 | 0.001023587 | 0.000591678 | 3.89E-05    | 0.002767456 | 0.010704527 | 0.000907274 | 0.001004818 |
| 0.007782577 | 0           | 0           | 8.53E-05    | 0           | 0           | 0           | 0.000129446 | 0.001018808 | 0           | 0           |
| 0.111127048 | 0.002469678 | 0           | 0.002407544 | 0.012371349 | 0.074076673 | 0.067408157 | 0.125318871 | 0.151609905 | 0.003753522 | 0.007419502 |
| 0.348007784 | 0.013306303 | 0.024571573 | 0.054109199 | 0.168667009 | 0.803163962 | 0.606541096 | 0.68568846  | 0.335633868 | 0.30783807  | 0.121722006 |
| 0.048301557 | 0.004733839 | 0.003483057 | 0.006488261 | 0.01232318  | 0.048381349 | 0.097048568 | 0.054795621 | 0.038667756 | 0.034014999 | 0.01325552  |
| 0.000671125 | 0.007158234 | 0.00021483  | 0.00308634  | 0.0130136   | 0.001107676 | 0.001271793 | 0.001622532 | 0.007216166 | 0.028732072 | 0.011977069 |
| 0.000329365 | 0.005009022 | 0.002243384 | 0.006089319 | 0.00292224  | 0.001787417 | 0.001804172 | 0.01152065  | 0.01320225  | 0.037804812 | 0.054820882 |
| 0           | 0.002096962 | 0.000683229 | 0.000984453 | 0.000931263 | 0.003397331 | 0.000311333 | 0.007789048 | 0.009385241 | 0.006379432 | 0.047482124 |
| 0           | 0.061087076 | 0.003588711 | 0.000629177 | 0.030948443 | 0           | 0           | 0.010723891 | 0.012709278 | 0.00330507  | 0.005477154 |
| 0           | 0.03787768  | 0.002739958 | 0.000329474 | 0.018484771 | 5.78E-05    | 2.96E-05    | 0.007878321 | 0.025179113 | 0.003079547 | 0.004095529 |
| 0           | 0.06369957  | 0.005184084 | 0.00336024  | 0.034545046 | 0.001352603 | 0.000110523 | 0.000821309 | 0.011446332 | 0.007429278 | 0.001332281 |
| 0           | 0.004890589 | 0.003909194 | 0.003540856 | 0.014555001 | 0.016829791 | 3.74E-05    | 0.007237789 | 0.007103486 | 0.016553862 | 0.002462701 |
| 0           | 0.007548366 | 0.002017989 | 0.000994377 | 0.031871678 | 0.002835925 | 4.51E-05    | 0.003588765 | 0.025216673 | 0.008505046 | 0.006369827 |
| 0           | 0.011745773 | 0.00456777  | 0.004183926 | 0.029037748 | 0.000210527 | 2.80E-05    | 0           | 0.002812286 | 0.014373812 | 0.002476158 |
| 0           | 0.049470186 | 0.012569291 | 0.006518033 | 0.002974422 | 0.000206399 | 0.000476339 | 0           | 0.00288271  | 0.001778257 | 0.003642464 |
| 0.001230692 | 0           | 0.000876927 | 0.03142311  | 0.002436538 | 0.000355007 | 0.002061021 | 0.000484305 | 0.005530672 | 0.006444238 | 0.00265559  |
| 0.008600677 | 0.55777095  | 0.690486924 | 0.554134009 | 0.087526694 | 0.003968369 | 0.013714197 | 0.00022095  | 0.179460454 | 0.087782648 | 0.379170666 |
| 0.002397636 | 0.016162629 | 0.000228917 | 0.011549462 | 0.002809846 | 0.000266943 | 0.040943337 | 0.008193008 | 0.004000113 | 0.013907214 | 0.002992024 |
| 0.007123847 | 0.054141325 | 0.010047685 | 0.021947749 | 0.025160161 | 0.003373939 | 0.006183064 | 0.004198052 | 0.059212936 | 0.01699713  | 0.012187901 |
| 0.002456071 | 0.05526644  | 0.017306107 | 0.051439664 | 0.009513335 | 0.000791197 | 0.0039368   | 0.000660618 | 0.015770397 | 0.00887314  | 0.002870908 |

| CC32        | CC33        | CC34        | CC35        | CC36        | CC37        | CC38        | CC39        | CC40        | CC41        | CC42        |
|-------------|-------------|-------------|-------------|-------------|-------------|-------------|-------------|-------------|-------------|-------------|
| 0           | 0           | 0           | 0           | 8.32E-05    | 0           | 0           | 0           | 0           | 0           | 0           |
| 0           | 0           | 0           | 0           | 2.17E-05    | 0           | 0           | 0           | 0.000287557 | 0           | 0           |
| 0           | 0           | 0           | 0           | 0.000450454 | 0           | 0           | 6.34E-05    | 0.000222038 | 0           | 0           |
| 0           | 0           | 4.81E-05    | 0.000134165 | 0.000671158 | 0           | 0           | 4.19E-05    | 7.64E-05    | 0           | 0           |
| 0           | 0           | 0           | 0           | 0           | 0           | 0           | 0           | 0           | 0           | 0           |
| 0           | 0           | 0           | 0           | 0.000633168 | 0           | 0           | 1.91E-05    | 0           | 0           | 0           |
| 0           | 0           | 0           | 0           | 0           | 0           | 0           | 0           | 0           | 0           | 0           |
| 0           | 0           | 0           | 0           | 0.000130252 | 0           | 0           | 0           | 0           | 0           | 0           |
| 0           | 0           | 0           | 0           | 4.70E-05    | 0           | 0           | 0           | 0           | 0           | 0           |
| 0           | 0           | 0.000288705 | 0           | 0.023608116 | 0.011174188 | 0           | 0.002021167 | 0.009638624 | 0.000825251 | 0           |
| 0           | 0.000833598 | 0           | 0           | 0.00011397  | 0           | 0.001580022 | 6.82E-05    | 0           | 0           | 0           |
| 0           | 0           | 0           | 0           | 0.00015196  | 0           | 0           | 6.94E-05    | 0           | 0           | 0           |
| 0.363332057 | 0.003887663 | 0.069866563 | 0.000629546 | 0.081309608 | 0.027626512 | 0.011445528 | 0.006564902 | 0.00101555  | 0.003208577 | 0.001934587 |
| 0.004780397 | 0.006506488 | 0.010464283 | 0.000921466 | 0.121200993 | 0.018035157 | 0.004393233 | 0.015910853 | 0.058119303 | 0.007829985 | 0.159784777 |
| 0.001684625 | 0.000449995 | 0.041393684 | 0           | 0.001921212 | 0.00351267  | 0.001406605 | 0.004505442 | 0.041422789 | 0           | 0.05224056  |
| 0           | 0           | 0.004421742 | 0           | 0.001459904 | 0.000206986 | 0           | 0           | 0.000531435 | 0           | 0.003862456 |
| 0           | 0.00089999  | 0.011690012 | 0           | 0.000180905 | 0.006477437 | 0           | 0           | 0           | 0           | 0           |
| 0.000765739 | 0           | 0.007326518 | 0           | 0.000173669 | 0.000870558 | 0           | 0           | 0           | 0           | 0           |
| 0           | 0.000376225 | 0.009532324 | 0           | 0           | 0           | 0           | 0           | 0           | 0           | 0           |
| 0.002330033 | 0.000774582 | 0.014772062 | 0.00011205  | 0.004216898 | 0.00126931  | 0.001464411 | 0.00012206  | 0.003862002 | 0.007935617 | 0           |
| 0           | 0           | 0.000412797 | 0           | 0           | 0.000222205 | 0           | 0           | 0           | 0.001591085 | 0           |
| 0.003883389 | 0.004440936 | 0.004107712 | 0.001086593 | 0.0024585   | 0.00021003  | 0           | 0.000112486 | 0.00305029  | 0           | 0           |
| 0           | 0           | 0.002947828 | 0           | 0.000443218 | 0           | 0           | 0           | 0           | 0           | 0           |
| 0           | 0           | 0.000230457 | 0           | 0.07743643  | 0           | 0           | 0.001231368 | 0           | 0           | 0           |
| 0           | 0           | 0.000339355 | 0           | 0.01511824  | 0           | 0           | 8.14E-05    | 0           | 0.002343714 | 0           |
| 0           | 0           | 8.10E-05    | 0           | 0.003451669 | 0.000435279 | 0           | 0           | 0           | 0.000726221 | 0           |
| 0.000820434 | 0.00146064  | 0.000478642 | 0.000129742 | 0.002467546 | 0.002480785 | 0           | 0.002534536 | 0.080901837 | 0           | 0.003439265 |
| 0.013050375 | 0           | 0.006062801 | 0           | 0.024063997 | 0.006927935 | 0.001445142 | 0.003635467 | 5.82E-05    | 0.003162363 | 0.000463495 |
| 0.002526938 | 0.001977028 | 0.031061091 | 0           | 0.003133276 | 0.010169698 | 0.001541485 | 0.000493026 | 0           | 0           | 0           |
| 0           | 0.001209823 | 6.84E-05    | 0           | 0           | 0           | 0           | 0           | 0           | 0           | 0           |
| 0           | 0.000494257 | 0.000258315 | 0           | 0.001005832 | 0.000663572 | 0           | 0.000342246 | 0           | 0.00705755  | 0           |
| 0.013444183 | 0.003031935 | 0.046724593 | 0.00013564  | 0.031844726 | 0.010379728 | 0           | 0.000148386 | 0.092131126 | 0.001591085 | 0           |
| 0.003347372 | 0.001401624 | 0.015096222 | 0.000138588 | 0.00325991  | 0           | 0.002890285 | 0.000494223 | 0.004906671 | 0.000798843 | 0           |
| 0.379554778 | 0           | 0           | 0           | 2.71E-05    | 0           | 0           | 0           | 0           | 0           | 0           |
| 0.0007548   | 0           | 0.000726827 | 0           | 0.005474188 | 0.009984019 | 0           | 4.07E-05    | 0.032723275 | 0           | 0           |
| 0           | 0           | 0           | 0           | 0.000969651 | 0.001439769 | 0           | 0           | 0.003898401 | 0           | 0           |
| 0           | 0           | 7.34E-05    | 0           | 0           | 0           | 0           | 0           | 0           | 0           | 0           |
| 0           | 0           | 0.000119027 | 0           | 9.95E-05    | 0           | 0           | 0           | 0           | 0           | 0           |
| 0.001662747 | 0.001497525 | 4.31E-05    | 0           | 0.042407775 | 0.003856632 | 0.001425874 | 0.00021181  | 0.1088968   | 0           | 0.003741545 |
| 0           | 0           | 0           | 0           | 0.003008452 | 0           | 0           | 0.000220186 | 0.005558225 | 0           | 0           |
| 0.006038396 | 0.040831532 | 0.074417462 | 0.000246216 | 0.095649956 | 0.118541968 | 0.00591545  | 0.251668151 | 0.004426196 | 0.023476751 | 0.000960576 |
| 0.037280534 | 0.591647794 | 0.272203046 | 0.004072143 | 0.346335586 | 0.474481394 | 0.498208023 | 0.649584279 | 0.036836435 | 0.309363632 | 0.431029966 |
| 0.007799595 | 0.049580619 | 0.01841886  | 0.003068113 | 0.056507518 | 0.053804124 | 0.030097499 | 0.047907273 | 0.005944061 | 0.018492233 | 0.226736258 |
| 0.007515178 | 0.008092537 | 0.00068884  | 0           | 0           | 0.000222205 | 0           | 0           | 0           | 0.005651321 | 0           |
| 0.00561177  | 0.019084223 | 0.001086442 | 0.000107627 | 0.00045769  | 0.001567613 | 0           | 0           | 0           | 0.022030911 | 0           |
| 0.002209703 | 0.089748224 | 0.001251054 | 0           | 0           | 0.004261472 | 0.00148368  | 0           | 0           | 0.030448475 | 0.001296442 |
| 0.001629929 | 0.003356522 | 0.001218132 | 0.001037939 | 0           | 0.01668975  | 0           | 0           | 0           | 0.012774891 | 0           |
| 0.00074386  | 0.00389504  | 0.001365017 | 0.000378907 | 0.000103116 | 0.011481622 | 0           | 0           | 0           | 0.007083958 | 0.000409756 |
| 0.002362851 | 0.00219096  | 0.000412797 | 0.002353056 | 0           | 0.017870786 | 0.129369147 | 0           | 0           | 0.004192277 | 0.000517233 |
| 0.00449598  | 0.022145666 | 0.001539759 | 0.000398073 | 5.97E-05    | 0.019404916 | 0.122316852 | 0.00014001  | 6.55E-05    | 0.011256429 | 0.064439205 |
| 0.002636329 | 0.005001586 | 0.001810736 | 0.002266069 | 0           | 0.027532151 | 0.037670045 | 0           | 0           | 0.012207118 | 0.000517233 |
| 0.000809495 | 0.008785972 | 0.00044572  | 0.010142024 | 3.26E-05    | 0.002027243 | 0           | 0           | 0           | 0.008688246 | 0           |
| 0.003281737 | 0.014930988 | 0.000942089 | 0.005179376 | 3.08E-05    | 0.002209877 | 0.101314116 | 0           | 0           | 0.01063584  | 0.006381449 |
| 0.000787617 | 0.02023503  | 0.001023129 | 0.000654609 | 0.003147749 | 0.001287573 | 0           | 0.003566061 | 0.011025451 | 0.009737966 | 0.005723153 |
| 0.076803588 | 0.056183008 | 0.156171572 | 0.966091524 | 0.027976974 | 0.102619283 | 0.032217041 | 0.000594742 | 0.459836638 | 0.448976358 | 0.012339708 |
| 0.011179784 | 0.005481089 | 0.150096108 | 0.000486534 | 0.012701347 | 0.00716536  | 0.002774673 | 0.002028347 | 0.007501966 | 0.004674224 | 0.000490364 |
| 0.033003336 | 0.028371829 | 0.025236345 | 0.000113525 | 0.00139116  | 0.018488699 | 0.008285483 | 0.004643059 | 0.014177659 | 0.018472427 | 0.006771054 |
| 0.00387245  | 0.001195069 | 0.013037301 | 0.000116473 | 0.002561616 | 0.004401492 | 0.002755405 | 0.000935792 | 0.012885472 | 0.004766652 | 0.016920917 |

| CC43        | CC44        | CC45        | CC46        | CC47        | CC48        | CC49        | CC50        | CC51        | CC52        | CC53        |
|-------------|-------------|-------------|-------------|-------------|-------------|-------------|-------------|-------------|-------------|-------------|
| 0.000795324 | 0           | 0           | 0           | 0           | 0.000991285 | 0           | 0           | 0           | 0.004496933 | 0           |
| 0.000717095 | 0           | 0           | 0.000788595 | 0           | 0.000952026 | 0           | 0           | 0           | 0.000378383 | 0           |
| 0.002642387 | 0.000332349 | 0           | 0.000147564 | 0           | 0.000461291 | 0           | 0           | 8.91E-05    | 0.002534679 | 0           |
| 0.002042635 | 0           | 7.27E-05    | 0.000171365 | 0           | 0.000206109 | 0           | 0           | 0           | 0.001831275 | 0           |
| 0           | 0           | 0           | 0           | 0           | 0           | 0           | 0           | 0           | 5.09E-05    | 0           |
| 0.002698885 | 0           | 0           | 0           | 0           | 0           | 0           | 0           | 3.36E-05    | 0.002258169 | 0           |
| 0.000634521 | 0           | 0           | 0           | 0           | 0           | 0           | 0           | 0           | 0.000790723 | 0           |
| 5.22E-05    | 0           | 0           | 0           | 0           | 0           | 0           | 0           | 0           | 6.06E-05    | 0           |
| 0.000160803 | 0           | 0           | 0           | 0           | 0           | 0           | 0           | 0           | 5.09E-05    | 0           |
| 0           | 0.002522444 | 0.000649137 | 0.013144303 | 0           | 0           | 0           | 0           | 0.043173377 | 0.053487791 | 5.03E-05    |
| 0           | 0           | 5.97E-05    | 0.011322761 | 0           | 0           | 0           | 0           | 4.26E-05    | 0.002430381 | 0.00010943  |
| 0           | 0.000115044 | 6.62E-05    | 0           | 0           | 0           | 0           | 0           | 0           | 0.002061701 | 0           |
| 0.001051739 | 0.036373049 | 0.007626549 | 0.003040136 | 0.017183302 | 0.000922582 | 0.020169097 | 0.000324885 | 0.009562504 | 0.027757767 | 0.001575796 |
| 0.00086486  | 0.04859753  | 0.031392705 | 0.030534642 | 0.000246242 | 0.00196294  | 0.001698536 | 0.000782131 | 0.032459806 | 0.10284733  | 0.000402703 |
| 4.78E-05    | 0.006139936 | 0.003263446 | 0           | 0           | 0.000176665 | 0.002138697 | 0           | 6.07E-05    | 0.000356553 | 0.000877631 |
| 0           | 0           | 0.001548563 | 0.000161844 | 0           | 0.0003337   | 0           | 0           | 3.36E-05    | 0           | 0           |
| 0           | 0           | 0.002058829 | 0           | 0           | 0.000245367 | 0.000164723 | 0           | 0           | 0.000240127 | 0           |
| 0           | 0           | 0.000737949 | 0           | 0           | 0           | 0           | 0           | 0           | 0.000213447 | 0           |
| 0           | 0           | 0.001687433 | 0           | 0           | 0.000206109 | 0           | 0           | 0           | 0           | 0           |
| 0.000195571 | 0.000402654 | 0.000510267 | 0           | 0.00029044  | 0           | 0.000607584 | 0           | 0.000131772 | 0           | 8.54E-05    |
| 0           | 0.000206653 | 0           | 0.000158671 | 0.000284126 | 0           | 0           | 0           | 3.36E-05    | 0.000121277 | 0           |
| 0           | 0.000873482 | 0.002031378 | 0.001899292 | 0.001859446 | 0           | 0           | 0.002305783 | 0           | 0.00121034  | 0           |
| 0           | 0           | 0.000130796 | 0           | 0           | 0           | 0           | 0           | 0           | 6.55E-05    | 0           |
| 0           | 0           | 0.000532873 | 0.000153911 | 0           | 0.000225738 | 0           | 0           | 0.002405483 | 0.000400212 | 0           |
| 0           | 0.000123566 | 0.00939795  | 0           | 0           | 0           | 0           | 0           | 0.000426321 | 0.005023273 | 3.72E-05    |
| 0           | 0           | 0.008349965 | 0           | 0           | 0           | 0           | 0           | 0           | 0.001649361 | 0           |
| 0.000847476 | 0.000828742 | 0.001083509 | 0.020809698 | 0           | 0.034557553 | 0           | 0           | 0.000897857 | 0.006328208 | 3.50E-05    |
| 0.001747104 | 0.0022114   | 0.004372792 | 0.004664927 | 0.001246997 | 0           | 0.001647228 | 0           | 0.000785464 | 0.010747524 | 2.85E-05    |
| 0           | 0.009785124 | 0.011881463 | 0.03907114  | 0           | 0           | 0           | 0.000222607 | 0.001258292 | 0.001513531 | 0.001256259 |
| 0           | 0.000112913 | 0           | 0           | 0           | 0           | 0           | 0           | 0           | 0.004113699 | 0           |
| 0           | 0.000724351 | 0.004353415 | 0.005609019 | 0.000830279 | 0.000157035 | 0           | 0           | 6.33E-05    | 0.000366255 | 0           |
| 0.000334644 | 0.015775929 | 0.003681671 | 0.002832277 | 0.003788345 | 0.001354428 | 0.013942034 | 0.000203053 | 0.004208949 | 0.036792867 | 0.013392075 |
| 0.000108651 | 0.0068792   | 0.005932658 | 0.000972653 | 0.000966028 | 0.00050055  | 0.007347719 | 0           | 0.000361727 | 0.019326624 | 0.002420597 |
| 6.08E-05    | 0           | 0.001406463 | 0.000176125 | 0           | 0           | 0           | 0           | 0.000335889 | 0.000965361 | 0           |
| 0.024555075 | 0.003634535 | 0.035917285 | 0.00049188  | 0           | 0.000579067 | 0           | 0           | 0           | 0.003022211 | 3.06E-05    |
| 0.00341598  | 0.001141917 | 0.002953411 | 0           | 0           | 0           | 0           | 0           | 0           | 0.000339574 | 0           |
| 0           | 0           | 0.0001421   | 0           | 0           | 0           | 0           | 0           | 0           | 0           | 0           |
| 0           | 0.000210914 | 0           | 0           | 0           | 0           | 0.000135019 | 0           | 0           | 0           | 0           |
| 0.194723918 | 0.003839058 | 0           | 0           | 0           | 0.293361338 | 0.000315944 | 0           | 0.010571464 | 0.107518901 | 0.002978692 |
| 0.009287468 | 0.000117174 | 0           | 0           | 0           | 0.014888898 | 0           | 0           | 0.000821636 | 0.005949825 | 0.000196974 |
| 7.39E-05    | 0.036848138 | 0.149151278 | 0.100895698 | 0           | 0.000274812 | 0.003642805 | 0           | 0.601377145 | 0.140270835 | 0.003355132 |
| 0.678506704 | 0.303110873 | 0.613003081 | 0.513993986 | 0.007797677 | 0.02540044  | 0.059632371 | 0.004143792 | 0.243392997 | 0.280893371 | 0.043726144 |
| 0.071474826 | 0.053254677 | 0.040198035 | 0.172959293 | 0.001139661 | 0.026960977 | 0.005630281 | 0.002531398 | 0.042354324 | 0.138861602 | 0.015121074 |
| 0           | 0.023524349 | 0.000494119 | 0           | 0.024444297 | 0           | 0.00367521  | 0           | 0           | 3.40E-05    | 0.004294043 |
| 6.95E-05    | 0.022448475 | 0.003381324 | 0.000153911 | 0.026376353 | 0           | 0.004209884 | 0           | 0.000113686 | 0.00194285  | 0.003992016 |
| 0           | 0.015162361 | 0.001406463 | 0           | 0.011551296 | 0           | 0.000958633 | 0           | 5.56E-05    | 0           | 0.002346185 |
| 0           | 0.004863801 | 0.000192157 | 0           | 0           | 0           | 0.013188629 | 0.00122584  | 0           | 0           | 0.000919214 |
| 0           | 0.001614876 | 0.000340716 | 0           | 0           | 0           | 0.00735042  | 0.000115816 | 0           | 0           | 0.001234373 |
| 0           | 0.006817417 | 0.000200231 | 0           | 0.004220848 | 0           | 0.038547847 | 0.002854779 | 2.45E-05    | 5.09E-05    | 0.001774959 |
| 0.000169495 | 0.012039132 | 0.003668753 | 0           | 0.000865005 | 0           | 0.011166049 | 0.001249906 | 9.69E-05    | 0           | 0.005151977 |
| 4.35E-05    | 0.017993719 | 0.000983394 | 0           | 0.002550819 | 0           | 0.010199315 | 0.001684591 | 0           | 0           | 0.00229147  |
| 0           | 0.00928873  | 7.27E-05    | 0.000153911 | 0.008716351 | 0           | 0.015605464 | 0.008344739 | 0           | 0           | 0.006808751 |
| 0           | 0.005119454 | 0.000214764 | 0           | 0.01869864  | 0           | 0.022677745 | 0.003176656 | 0           | 0           | 0.001466366 |
| 0.000743171 | 0.001380527 | 0.001107731 | 0.00049664  | 0.001565849 | 0.591207993 | 0.000918127 | 0.000410619 | 4.39E-05    | 0.00389055  | 0.004445057 |
| 0.001577609 | 0.314402219 | 0.030333417 | 0.002572056 | 0.859515534 | 0.002954224 | 0.745451894 | 0.969356998 | 0.002826636 | 0.003541274 | 0.853262773 |
| 3.48E-05    | 0.017147934 | 0.006770722 | 0.06879656  | 0.001483769 | 0           | 0.002044184 | 0.001066406 | 0.000161485 | 0.00178519  | 0           |
| 0.000186879 | 0.01308731  | 0.004025617 | 0.001946893 | 0.003829386 | 0.001118876 | 0.000748004 | 0           | 0.00151796  | 0.021119091 | 0.019828764 |
| 0.000134727 | 0.000948047 | 0.002614309 | 0.001880251 | 0.00054931  | 0           | 0.006186558 | 0           | 0.000277754 | 0.000308042 | 0.006504535 |

| CC54        | CC55        | CC56        | CC57        | CC58        | CC59        | CC60        | CC61        | CC62        | CC63        | CC64        |
|-------------|-------------|-------------|-------------|-------------|-------------|-------------|-------------|-------------|-------------|-------------|
| 0           | 0           | 0           | 0           | 0           | 0           | 0           | 5.42E-05    | 0           | 0           | 0           |
| 0           | 0.000170016 | 0           | 0.000272134 | 0           | 0           | 0           | 8.87E-05    | 0           | 0           | 0           |
| 0           | 0           | 0           | 0.000501688 | 0           | 0           | 0           | 9.36E-05    | 0           | 0           | 0           |
| 0           | 0           | 0           | 0.002056737 | 0           | 0           | 0           | 5.91E-05    | 0           | 0           | 0           |
| 0           | 0           | 0           | 0           | 0           | 0           | 0           | 0           | 0           | 0           | 0           |
| 0           | 0           | 0           | 0.000186976 | 0           | 3.52E-05    | 0           | 0           | 0           | 0           | 0           |
| 0           | 0           | 0           | 6.29E-05    | 0           | 0           | 0           | 0           | 0           | 0           | 0           |
| 0           | 0           | 0           | 0           | 0           | 0           | 0           | 0           | 0           | 0           | 0           |
| 0           | 0           | 0           | 0.000112926 | 0           | 0           | 0           | 0           | 0           | 0           | 0           |
| 0.000182737 | 0.016451044 | 0           | 0.066454267 | 0.044511286 | 0.000307403 | 7.27E-05    | 0.004464879 | 0.002028482 | 0.001936642 | 9.36E-05    |
| 0           | 0           | 0           | 0.00705881  | 0.000132959 | 0.000111605 | 0           | 0.000945678 | 0           | 0           | 0           |
| 0           | 0.000704351 | 0           | 0.001244039 | 0.006738281 | 0           | 6.68E-05    | 0           | 0           | 0.001409975 | 1.04E-05    |
| 0.007352764 | 0.003343642 | 0.000417236 | 0.036552901 | 0.00623153  | 0.105709475 | 0.729711403 | 0.002090834 | 0.149362477 | 0.520098367 | 0.000357631 |
| 0.000932921 | 0.001125342 | 0.004777761 | 0.036780605 | 0.00562945  | 0.053411783 | 0.000933304 | 0.024779711 | 0.001107385 | 0.010919014 | 0.001712261 |
| 0.001274351 | 0.180985767 | 0.000335425 | 0.000212894 | 0.000496716 | 0.008532884 | 0           | 0.00020933  | 0.00205953  | 0.007700953 | 0.000147627 |
| 0           | 0           | 0.000237252 | 0.000968203 | 0           | 0           | 0.000240374 | 0           | 0.00154206  | 0           | 0.000287976 |
| 0           | 0           | 0           | 0.000216596 | 0           | 0           | 0           | 5.17E-05    | 0           | 0.010541638 | 1.35E-05    |
| 0           | 0           | 0           | 0           | 0           | 0           | 0.00015283  | 0           | 0.000403626 | 0.0019947   | 7.28E-06    |
| 0           | 0           | 0           | 0           | 0.000566959 | 0           | 0           | 0           | 0           | 0           | 0           |
| 0.007973109 | 0.001546333 | 0.001971644 | 0.00102374  | 0.000235815 | 0.011432655 | 0.000546035 | 0.002780391 | 0.004119059 | 0.000613754 | 9.04E-05    |
| 0           | 0           | 0           | 0.000359142 | 0           | 7.83E-05    | 0           | 0           | 0           | 0           | 0           |
| 0.000899259 | 0           | 0           | 0.004894701 | 0.000406404 | 0.000511033 | 0.00017212  | 0.000169926 | 0           | 0.000675959 | 0           |
| 0           | 0           | 0           | 0           | 0           | 0           | 0           | 0           | 0.001511012 | 0           | 0           |
| 0           | 0           | 0           | 0           | 0           | 0           | 0           | 0           | 0           | 0           | 1.98E-05    |
| 0           | 0           | 0           | 0           | 0.000122925 | 0           | 0           | 0           | 0           | 8.71E-05    | 0.000198568 |
| 0           | 0           | 0           | 0.003382231 | 0.00107371  | 0           | 0           | 0           | 0           | 0           | 0.000176736 |
| 0.00021159  | 0.000331935 | 0           | 0.006758908 | 0.00073504  | 0.008965598 | 0.000468878 | 0.002243522 | 0.00204918  | 0.000223937 | 2.08E-05    |
| 0.000504931 | 0.000186208 | 0.000319063 | 0.034733124 | 0.000494207 | 0.010377303 | 0.058643816 | 0.000652616 | 0.010970359 | 0.033690112 | 0.000237034 |
| 0.002890132 | 0.000218592 | 0           | 0.013382675 | 0           | 0.001754352 | 0.011698197 | 0.000248733 | 0.003611939 | 0.025918661 | 0.000229757 |
| 0           | 0           | 0           | 0.000303605 | 0           | 0           | 0.001463017 | 5.42E-05    | 0           | 0.000311024 | 1.46E-05    |
| 0           | 0.001173918 | 0           | 0.000149951 | 0           | 8.03E-05    | 0           | 0           | 0.000320831 | 0.000348347 | 0.000160102 |
| 0.008074095 | 0.00012144  | 0.00179166  | 0.01780901  | 0.022851452 | 0.044563664 | 0.083771793 | 0.000655079 | 0.049604653 | 0.037086494 | 7.80E-05    |
| 0.004630943 | 0           | 0.000989913 | 0.008780472 | 0.006876257 | 0.018361952 | 0.006556866 | 0.000108359 | 0.023027405 | 0.008273237 | 2.91E-05    |
| 0.000678051 | 0           | 0           | 0.000199935 | 0.001304507 | 0.002400486 | 0.000316047 | 0           | 0.000310482 | 0.0434065   | 1.66E-05    |
| 0.000476078 | 0           | 0           | 0.007701194 | 0.001633143 | 0.006778533 | 0.0013547   | 0.000315226 | 0.012698708 | 0.033594732 | 9.67E-05    |
| 0           | 0           | 0           | 0.000697921 | 0.006813541 | 0.000698999 | 6.97E-05    | 0.000142837 | 0.001604156 | 0.003201473 | 0           |
| 0           | 0           | 0           | 0           | 0           | 5.87E-05    | 0           | 0           | 0           | 0           | 0           |
| 0.00038471  | 0           | 0           | 0           | 0.000511768 | 0.000117479 | 0.000232955 | 5.66E-05    | 0           | 0.012951037 | 0           |
| 0.000423181 | 0.056194239 | 0.000327244 | 0.100906001 | 0.001673281 | 0.010745404 | 0           | 0.03882204  | 0.002018132 | 0.00043958  | 2.70E-05    |
| 0.000221208 | 0.007812626 | 0           | 0.006044326 | 0           | 0.000540403 | 0           | 0.001955386 | 0           | 0           | 0           |
| 0.020586778 | 0           | 0.00059722  | 0.081995498 | 0.030450205 | 0.302621738 | 0.004298538 | 0.263890873 | 0.005267842 | 0.010773869 | 0.005124308 |
| 0.081332442 | 0.273490503 | 0.138636866 | 0.450384689 | 0.677919713 | 0.349955945 | 0.027283923 | 0.42190032  | 0.162371667 | 0.041204451 | 0.936523663 |
| 0.01099308  | 0.014799462 | 0.005694043 | 0.075092192 | 0.133526333 | 0.032347816 | 0.00267824  | 0.129038216 | 0.008817685 | 0.004346041 | 0.047704198 |
| 0.015951026 | 0           | 0.010300001 | 0.000298051 | 0.006432223 | 0.000567815 | 0.013520291 | 0           | 0.073491058 | 0.001563414 | 0           |
| 0.031983804 | 0           | 0.044955127 | 9.07E-05    | 0.000115399 | 0           | 0.019910973 | 0           | 0.043964232 | 0.013315971 | 1.56E-05    |
| 0.004231807 | 0           | 0.010635426 | 0.000114777 | 0.000383826 | 0           | 0.002707916 | 0           | 0.017883756 | 0.000111969 | 0.000206885 |
| 0.015152754 | 0.078992536 | 0.043278002 | 0           | 0.000273445 | 0           | 0.000157282 | 0           | 0.033780427 | 0.001675382 | 7.28E-06    |
| 0.00877619  | 0.123107563 | 0.014071486 | 4.81E-05    | 0.000649745 | 0           | 6.97E-05    | 0           | 0.037226776 | 0.001463886 | 0           |
| 0.075128998 | 0.049693162 | 0.096266966 | 0           | 0.000654762 | 0           | 0.000535648 | 0           | 0.026991224 | 0.001003571 | 5.30E-05    |
| 0.015388388 | 0.016232452 | 0.013523353 | 0.001375478 | 0.013815232 | 0.000399428 | 0.001925959 | 0.000142837 | 0.015741431 | 0.001173597 | 0.003334075 |
| 0.016552135 | 0.010889101 | 0.017033043 | 0           | 0.003364123 | 6.27E-05    | 0.000559389 | 0           | 0.030416874 | 0.000381523 | 0.001249628 |
| 0.030079491 | 0.069414984 | 0.095383407 | 0           | 0.00011289  | 0           | 0.000151347 | 0           | 0           | 0           | 0           |
| 0.015667303 | 0           | 0.033812473 | 0           | 0.000544381 | 0           | 0.000914014 | 5.91E-05    | 0.004160457 | 0           | 0           |
| 0.042034345 | 0.087728104 | 0.000392693 | 0.001016335 | 0.000802774 | 0.010232412 | 0.000489651 | 0.040531156 | 0.001272976 | 0.000232231 | 3.01E-05    |
| 0.419117187 | 0.001416798 | 0.427004164 | 0.018245905 | 0.013933139 | 0.006326239 | 0.018336672 | 0.057041112 | 0.149227935 | 0.014232455 | 0.001197647 |
| 0.035657781 | 0           | 0.014112392 | 0.003680282 | 0.003354088 | 0.003136687 | 0.001709326 | 0           | 0.004294999 | 0.007767304 | 0.000103962 |
| 0.114811805 | 0.000372415 | 0.019806435 | 0.005366769 | 0.004249683 | 0.006905801 | 0.007963499 | 0.004489506 | 0.107312883 | 0.131098661 | 0.000245351 |
| 0.009444623 | 0.003497466 | 0.003329706 | 0.002482524 | 0.000378809 | 0.001869873 | 0.000316047 | 0.001864266 | 0.009428299 | 0.014232455 | 0.000178815 |

| CC65        | CC66        | CC67        | CC68        | CC69        | CC70        | CC71        | CC72        | CC73        | CC74        | SC01        |
|-------------|-------------|-------------|-------------|-------------|-------------|-------------|-------------|-------------|-------------|-------------|
| 0           | 0           | 0           | 0           | 0           | 0           | 0           | 0           | 0           | 0           | 0           |
| 0           | 0           | 0           | 0           | 0           | 0           | 0           | 0           | 0           | 0           | 0           |
| 0           | 0           | 0           | 0           | 0           | 0           | 0           | 0           | 0           | 0           | 0           |
| 0           | 0           | 0           | 0           | 0           | 0           | 0           | 0           | 0           | 0           | 0           |
| 0           | 0           | 0           | 0           | 0           | 0           | 0           | 0           | 0           | 0           | 0           |
| 0           | 0           | 0           | 0           | 0           | 0           | 0           | 0           | 0           | 0           | 0           |
| 0           | 0           | 0           | 0           | 0           | 0           | 0           | 0           | 0           | 0           | 0           |
| 0           | 0           | 0           | 0           | 0           | 0           | 0           | 0           | 0           | 0           | 0           |
| 0           | 0           | 0           | 0           | 0           | 0           | 0           | 0           | 0           | 0           | 0           |
| 0.047607373 | 0.000511529 | 0.000941161 | 0           | 0.000160212 | 0.004276171 | 0.000307321 | 0.001035245 | 0.003341239 | 0           | 0.002180294 |
| 0           | 0.000517619 | 0           | 0           | 0           | 0.000147212 | 0           | 3.29E-05    | 0           | 0           | 0           |
| 0           | 0.000496305 | 7.49E-05    | 0           | 0.000242607 | 0           | 0.000173955 | 0           | 0.000565185 | 0           | 0           |
| 0.110554641 | 0.025999689 | 0.003582345 | 0.020144717 | 0.435997437 | 0.242732263 | 0.319330911 | 0.187948802 | 0.220322266 | 0.000181054 | 0.023012789 |
| 0.040019146 | 0.002152685 | 0.006354953 | 0.032150867 | 0.018959993 | 0.02060273  | 0.197792799 | 0.195741377 | 0.244054479 | 5.51E-05    | 0           |
| 0.004681353 | 0.004567225 | 0.001431525 | 0.001850572 | 0.010606061 | 0.049862952 | 0.000150761 | 0.019873575 | 0.020479631 | 0.045271463 | 0.008691933 |
| 0           | 0.000237496 | 4.66E-05    | 0.001571294 | 0.004101437 | 0.003526088 | 0.001082871 | 0.010674007 | 0.001540405 | 0.000241406 | 0           |
| 0.000315203 | 0.003958262 | 9.89E-05    | 0           | 0.001679941 | 0           | 0           | 0.000183521 | 0           | 0           | 0           |
| 0.017709756 | 0           | 0.000189363 | 0.000160797 | 0.000878879 | 0           | 0           | 0           | 0           | 0           | 0           |
| 0.007903431 | 0.000761204 | 0.00099486  | 0.002502222 | 0           | 0           | 0           | 0.005262497 | 0           | 0           | 0           |
| 0.015900256 | 0.008096167 | 0.000770169 | 0           | 0.001148952 | 0.003911645 | 0           | 0.001077596 | 0.005596436 | 0.059690213 | 0.004771791 |
| 0           | 5.79E-05    | 0.000329265 | 0           | 0           | 0           | 0           | 0.003039857 | 0           | 0.00155077  | 0.000118792 |
| 0           | 0.001385392 | 9.75E-05    | 0.001421781 | 0.001126064 | 0           | 4.20E-05    | 8.16E-05    | 0           | 0.016651754 | 0.001206198 |
| 0           | 0           | 0           | 0.000132587 | 0           | 0           | 0           | 4.08E-05    | 0           | 0           | 0           |
| 0.000607058 | 0.000240541 | 0.000463514 | 0.003703965 | 0.000270072 | 0           | 2.90E-05    | 0.012971939 | 0           | 0           | 0           |
| 0           | 0.000788608 | 0.000110226 | 0.005311931 | 0.000279227 | 0           | 0           | 0.003681395 | 0.011951993 | 0           | 5.30E-05    |
| 0           | 0.002487615 | 0.000402749 | 0.014254482 | 0.000338735 | 0           | 1.88E-05    | 0.006892225 | 0.030542134 | 0           | 0           |
| 0           | 9.13E-05    | 8.76E-05    | 0           | 0.000430285 | 0.101702757 | 0.01400049  | 0.015611814 | 0.00485948  | 0.011781654 | 0           |
| 0.010028135 | 0.019578171 | 0.000271326 | 0.000840656 | 0.027826604 | 0.008937897 | 0.016634461 | 0.013053503 | 0.013453611 | 2.62E-05    | 0.001198887 |
| 0.000268507 | 0.003869962 | 2.68E-05    | 0.000995811 | 0.012858189 | 0.000119172 | 0           | 0.001039951 | 0           | 0           | 0.007112911 |
| 0.000338552 | 0.001924324 | 0           | 0           | 0.000544722 | 0           | 0           | 0           | 0.000155149 | 0           | 0.000151688 |
| 0.000245158 | 8.22E-05    | 5.65E-05    | 0           | 0           | 0           | 4.06E-05    | 0.006608316 | 0           | 0           | 6.40E-05    |
| 0.015526681 | 0.00124533  | 0.000713643 | 0.000172081 | 0.012533187 | 0.001324912 | 0.219071862 | 0.134603862 | 0.098663505 | 0.00069273  | 0.049011832 |
| 0.001225791 | 0.000395826 | 0.000241649 | 0           | 0.001670786 | 0.000161233 | 0.017682541 | 0.006943987 | 0.010577818 | 0.00024403  | 0.01873627  |
| 0.000198461 | 0           | 0           | 0.001052231 | 0.00031127  | 0.015969043 | 0           | 0.00036861  | 0.012356487 | 0           | 0           |
| 0.044969005 | 0.000216182 | 0.000463514 | 0.0050524   | 0.002558821 | 0           | 1.74E-05    | 0.010506172 | 0.000426659 | 0.000690106 | 0.000232102 |
| 0.00319873  | 0           | 9.89E-05    | 0           | 0           | 0           | 0           | 0.001126222 | 0           | 0.000123327 | 0           |
| 0           | 0.000200958 | 0           | 0           | 0.000576765 | 0           | 0           | 0           | 0           | 0           | 0           |
| 0.001132397 | 0           | 0           | 0.000138229 | 0.000297537 | 0           | 0           | 0           | 0           | 0           | 0.000158999 |
| 0.006922799 | 0.000130927 | 0           | 0           | 0.000297537 | 0.02788624  | 6.09E-05    | 0.007632582 | 0.01690567  | 3.94E-05    | 0.000966786 |
| 0.000210136 | 9.13E-05    | 0           | 0           | 0           | 0.00124079  | 0           | 0.000630559 | 0.00080899  | 0           | 8.41E-05    |
| 0.010857003 | 0.00921057  | 0.013581822 | 0.009343132 | 0.003684885 | 0           | 0.041969578 | 0.020588835 | 0.039479809 | 3.15E-05    | 0.004599999 |
| 0.411387011 | 0.644928706 | 0.773135096 | 0.757606105 | 0.101972901 | 0.135694808 | 0.05514958  | 0.061485734 | 0.049675296 | 0.038887329 | 0.067855929 |
| 0.073734225 | 0.042721823 | 0.053595276 | 0.039110259 | 0.005177149 | 0.049785841 | 0.009940087 | 0.010490487 | 0.004471608 | 0.024489571 | 0.007028843 |
| 0.004622982 | 0.000341019 | 4.95E-05    | 0.000716532 | 0.000160212 | 0           | 0.000572602 | 0.000451743 | 0.001806374 | 0           | 0.002048708 |
| 0.006887776 | 0.001440198 | 0.00013425  | 0.000939391 | 0           | 0           | 0.005649193 | 0.002128527 | 0.004443903 | 0           | 0           |
| 0.007354744 | 0.006284502 | 0.006405827 | 0.00178851  | 0           | 0.000252364 | 0           | 4.55E-05    | 0.000304756 | 0           | 0           |
| 0.001295836 | 0.001428019 | 0.004698737 | 0.000361087 | 0.005218347 | 0           | 5.22E-05    | 0           | 0           | 0.002141165 | 0.000890028 |
| 0.001412578 | 0.001963907 | 0.003010018 | 0.00150359  | 0.005840886 | 0           | 0           | 4.55E-05    | 0           | 0.003148772 | 0.001085578 |
| 0.001762804 | 0.001948683 | 0.001492291 | 0.001057873 | 0.000970429 | 0.000231334 | 0           | 0           | 0.00048761  | 0.004059291 | 0.000745649 |
| 0.011207229 | 0.03055778  | 0.01809261  | 0.032915356 | 0.004032775 | 0.002523642 | 4.49E-05    | 0.000161561 | 0.000725874 | 0.00285751  | 0.003682558 |
| 0.004296104 | 0.012361956 | 0.017561264 | 0.004034021 | 0.002146846 | 0.000154223 | 2.46E-05    | 0.000134896 | 0           | 0.000881656 | 0.001102026 |
| 0.000875565 | 0.001881697 | 0.000747558 | 0.000200291 | 0           | 0           | 5.51E-05    | 0           | 0           | 0.000209918 | 0.000933889 |
| 0           | 0.00257287  | 0.000722122 | 0.000363908 | 0.003890872 | 0.001458104 | 4.35E-05    | 4.24E-05    | 0.000127444 | 0.005253201 | 0.004254588 |
| 0.002358188 | 0.006184023 | 0.000668422 | 0.003199007 | 0.000430285 | 0.229006456 | 0.001651124 | 0.007113391 | 0.023405293 | 0.014106497 | 0.000133413 |
| 0.046685112 | 0.100481994 | 0.0824434   | 0.026136508 | 0.266108212 | 0.039509012 | 0.049646799 | 0.204282151 | 0.104415089 | 0.72602276  | 0.675298899 |
| 0.022414457 | 0.037009746 | 0.002591724 | 0.006183618 | 0.006536666 | 0           | 0.011452047 | 0.023107932 | 0.009364334 | 0.013450503 | 0.086740233 |
| 0.05346782  | 0.008495038 | 0.002359967 | 0.022717463 | 0.053799323 | 0.03337516  | 0.029340435 | 0.015065958 | 0.049165522 | 0.024830688 | 0.014962334 |
| 0.009817999 | 0.010102702 | 0.000862024 | 0.000366729 | 0.00433489  | 0.025607952 | 0.007971495 | 0.008192556 | 0.015525954 | 0.002390442 | 0.01088502  |

| SC02        | SC03        | SC04        | SC05        | SC06        | SC07        | SC08        | SC09        | SC10        | SC11        | SC12        |
|-------------|-------------|-------------|-------------|-------------|-------------|-------------|-------------|-------------|-------------|-------------|
| 0           | 0           | 0           | 0           | 0.000158159 | 0           | 0           | 0           | 0           | 0.000153899 | 0           |
| 4.10E-05    | 0           | 0           | 0           | 0.000700182 | 0           | 0           | 0.000114672 | 0           | 3.69E-05    | 0           |
| 0           | 0           | 0           | 0.000464716 | 3.29E-05    | 7.07E-05    | 0           | 0           | 0           | 0           | 0           |
| 0           | 7.20E-05    | 0           | 0.000952669 | 0           | 6.56E-05    | 0.000441466 | 0.000121839 | 5.89E-05    | 0           | 0           |
| 0           | 0           | 0           | 0           | 0           | 0           | 0           | 0           | 0           | 0           | 0           |
| 0           | 0           | 0           | 0           | 0.000151569 | 0           | 0           | 0           | 0           | 0           | 0           |
| 0           | 0           | 0           | 0           | 0           | 0           | 0           | 0           | 0           | 0           | 0           |
| 0           | 0           | 0           | 0           | 0           | 0           | 0           | 0           | 0           | 0           | 0           |
| 0           | 0           | 0           | 0           | 0           | 0           | 0           | 0           | 0           | 0           | 0           |
| 0.000414887 | 0.002970982 | 0           | 0           | 1.65E-05    | 0           | 0.002919083 | 0.000232927 | 0.000490799 | 0.010155274 | 0.000743263 |
| 0           | 8.12E-05    | 0           | 0           | 0           | 0           | 6.76E-05    | 0           | 0           | 0.001372778 | 0           |
| 0           | 0.000438684 | 0.000310915 | 0           | 0           | 0           | 0.000635171 | 0           | 0           | 0.034239422 | 0           |
| 0.306741182 | 0.055863743 | 0.037268862 | 0.013999582 | 0.011306704 | 0.115479264 | 0.154121291 | 0.004998979 | 0.026053103 | 0.149534302 | 0.001554096 |
| 0.081175263 | 0.068887321 | 0.039440449 | 0.096114971 | 0.053871183 | 0.087015947 | 0.079698181 | 0.066506126 | 0.000141954 | 0.031930938 | 0.169437012 |
| 0           | 0.085724432 | 0.001193047 | 0.024502173 | 0.005586629 | 0.000139708 | 0.023537361 | 0.018412009 | 0.001467866 | 0.024332438 | 0.036771264 |
| 0.000116431 | 0.000162476 | 0           | 0           | 0.008074335 | 0.000414073 | 0.001364942 | 0.005826767 | 0.000371497 | 0.000695623 | 0           |
| 0           | 0.000329593 | 0           | 0           | 0           | 0.000131291 | 0.005950786 | 0.008550225 | 0.001158285 | 0.000966485 | 0.009446201 |
| 7.22E-05    | 0.000174081 | 7.23E-05    | 0           | 0           | 0           | 0.000858156 | 0.000207843 | 0.000277868 | 0.000125171 | 0.002283846 |
| 0           | 0           | 8.68E-05    | 0           | 0           | 0           | 0           | 0.000842122 | 0           | 0           | 0           |
| 0.000247621 | 0.00158994  | 0.014215337 | 0.014998722 | 0.015244199 | 0.002226905 | 0.00195056  | 0.034039641 | 0.001328932 | 0.002448018 | 0.012811157 |
| 0           | 0.000422436 | 0           | 0           | 0           | 0           | 0           | 0.027403004 | 0           | 4.10E-05    | 0.000864888 |
| 6.56E-05    | 0.00219342  | 0           | 0           | 0.000453059 | 0           | 0           | 0.047771602 | 0           | 0.00032011  | 0           |
| 3.94E-05    | 0.000157833 | 0           | 0           | 0.000161454 | 0           | 0           | 0.000498106 | 9.66E-05    | 0           | 0           |
| 0           | 0.005656471 | 0           | 0           | 0.01033304  | 0           | 0           | 0           | 0           | 0           | 0.000648666 |
| 0           | 0.002843322 | 0           | 0           | 0.005194527 | 0.000350111 | 5.41E-05    | 0.000888707 | 0           | 0.000613544 | 0           |
| 0           | 0.000320309 | 0           | 0           | 0.003799105 | 0.000861811 | 0           | 0.000422853 | 0           | 0.001588236 | 0.002500068 |
| 0.001598874 | 0.000178723 | 0.000443476 | 0.000406627 | 0.00093083  | 0.001457672 | 0           | 0           | 0.000480228 | 0.002764024 | 0           |
| 0.017020223 | 0.01827386  | 0.005936313 | 0.001254734 | 0.001728214 | 0.007874122 | 0.01331156  | 0.005217572 | 0.001792548 | 0.008173056 | 0           |
| 0.010770674 | 0.00488123  | 0.000144612 | 0.188686479 | 4.12E-05    | 0.000595861 | 0.036141675 | 0.001250641 | 0           | 0.005281809 | 0.005527176 |
| 0           | 0           | 0.000209687 | 0           | 0           | 0           | 0           | 0           | 0           | 0.000205198 | 0           |
| 0           | 0.001796516 | 0.001414785 | 0           | 0           | 0           | 0.00046399  | 0.001451316 | 0           | 0.000178523 | 0           |
| 0.296223049 | 0.013318355 | 0.058413513 | 0.118618863 | 0.075830539 | 0.278489407 | 0.055836477 | 0.008116621 | 0.152546263 | 0.159350998 | 0.033554961 |
| 0.061170474 | 0.004635196 | 0.020248057 | 0.059518554 | 0.019672644 | 0.037505597 | 0.002702855 | 0.003185729 | 0.026548432 | 0.011909721 | 0           |
| 0.001639871 | 5.80E-05    | 0.00024584  | 0           | 0           | 0.0602914   | 0.002130751 | 0.00021501  | 5.29E-05    | 0.011924085 | 0.004729858 |
| 4.76E-05    | 0.002304832 | 0           | 0           | 0.030348361 | 0.00626496  | 0.008083789 | 0.003060307 | 0.007233617 | 0.003102601 | 0.017135598 |
| 0           | 0.000252998 | 0           | 0           | 0.002721649 | 0.000804581 | 0.001626218 | 9.68E-05    | 0.000443984 | 0.000471957 | 0.001783832 |
| 0           | 0.000266924 | 0           | 0           | 3.29E-05    | 0.003294069 | 0.000797342 | 0.000247261 | 0           | 0.000363201 | 0           |
| 0           | 0           | 0           | 0.021969468 | 0.002789196 | 0           | 0.000328847 | 9.32E-05    | 0           | 3.49E-05    | 0.050812184 |
| 0.013194403 | 0.000858799 | 0.001325608 | 0.000418245 | 0.62021302  | 0.004475693 | 0.042563207 | 0.093493444 | 0.013532452 | 0.045414532 | 0           |
| 0.001603794 | 8.59E-05    | 0.00024584  | 0.000534424 | 0.037495161 | 0.000479719 | 0.003727687 | 0.007460841 | 0.001522231 | 0.003679209 | 0           |
| 0.023146782 | 0.013134989 | 0.009476891 | 0.072402816 | 0.009375849 | 0.024097034 | 0.069240385 | 0.017580638 | 0.083968855 | 0.05717651  | 0.008338063 |
| 0.02456855  | 0.138496497 | 0.14454428  | 0.140100379 | 0.058441312 | 0.020589196 | 0.156369165 | 0.309087391 | 0.510031925 | 0.186751154 | 0.27757507  |
| 0.001138071 | 0.014198044 | 0.017420897 | 0.009979785 | 0.005158282 | 0.00231275  | 0.011698857 | 0.02695865  | 0.02542337  | 0.022857061 | 0.037163167 |
| 0.015444307 | 0.001473886 | 0.003911748 | 0.021562841 | 0.00125209  | 0.003913496 | 0.000211724 | 0.000824204 | 0.001904299 | 0.001686732 | 0           |
| 0.010163922 | 0.001244099 | 0.000884542 | 0.048911402 | 9.72E-05    | 0.035835839 | 0.000301819 | 0.00123989  | 8.91E-05    | 0.004957596 | 0.000824347 |
| 0.000145949 | 0.000875047 | 0.000195226 | 0.003264633 | 0           | 0.000225552 | 0.000382904 | 0.002185933 | 0           | 0.000652531 | 0           |
| 0           | 0.002061119 | 0.00134971  | 0           | 7.08E-05    | 0           | 0.003263697 | 0.00050169  | 0.000285418 | 0.000673051 | 0.005770426 |
| 4.26E-05    | 0.002738874 | 0.001328018 | 0           | 1.98E-05    | 0           | 0.004218706 | 0.001107301 | 0.000267296 | 0.000590972 | 0.005054191 |
| 0           | 0.001088586 | 0.000884542 | 0           | 0           | 0           | 0.001137451 | 0.000688031 | 0.000309581 | 0.000219562 | 0.005419065 |
| 0.000565756 | 0.006280841 | 0.004210613 | 0           | 0           | 0.000262583 | 0.003090264 | 0.006235285 | 0.006670331 | 0.004126542 | 0.014189573 |
| 0           | 0.000784525 | 0.001019513 | 0           | 0           | 0           | 0.000734276 | 0.001591073 | 0.001504109 | 0.000246238 | 0.000878402 |
| 0           | 0           | 0.000554345 | 0           | 0           | 0           | 0.000101357 | 0.000329682 | 4.53E-05    | 8.21E-05    | 0           |
| 0.000321415 | 0.002926881 | 0.001759443 | 0.000348537 | 0           | 0.000548731 | 0.001009066 | 0.00043002  | 0.000326192 | 0.000619699 | 0           |
| 0.001169228 | 0.005988385 | 0.018341592 | 0.001986663 | 0.001784229 | 0.000138024 | 0.000695985 | 0.011488692 | 0.001081267 | 0.015515058 | 0.022365469 |
| 0.096283396 | 0.505466142 | 0.514077955 | 0.132943746 | 0.009950823 | 0.258822618 | 0.24229067  | 0.228877971 | 0.076279172 | 0.162197101 | 0.089353766 |
| 0.000167267 | 0.006914496 | 0.038534215 | 0.000441481 | 0.002392151 | 0.000220502 | 0.012883608 | 0.021260889 | 0.044413503 | 0.003250344 | 0.021473553 |
| 0.019803084 | 0.01569514  | 0.045314097 | 0.01161791  | 0.003571752 | 0.034581837 | 0.009000507 | 0.008009116 | 0.008622955 | 0.015422719 | 0.137003703 |
| 0.014857233 | 0.005832873 | 0.014976959 | 0.013999582 | 0.000998377 | 0.010163306 | 0.044056535 | 0.020877455 | 0.003178865 | 0.011567039 | 0.023987135 |



| SC13        | SC14        | SC15        | SC16        | SC17        | SC18        | SC19        | SC20        | SC21        | SC22        | SC23        |
|-------------|-------------|-------------|-------------|-------------|-------------|-------------|-------------|-------------|-------------|-------------|
| 0           | 0           | 0           | 0           | 0           | 0           | 0           | 0           | 0           | 0           | 0           |
| 5.80E-05    | 0           | 0           | 0           | 0           | 0.000126477 | 0           | 0           | 0           | 0           | 0           |
| 0           | 0           | 0           | 4.81E-05    | 0           | 0.000118572 | 0           | 0           | 0           | 0           | 0           |
| 0           | 0.000450925 | 0.000301067 | 0           | 0           | 0           | 0           | 0           | 0           | 0           | 4.93E-05    |
| 0           | 0           | 0           | 0           | 0           | 0           | 0           | 0           | 0           | 0           | 0           |
| 0           | 6.10E-05    | 0           | 0           | 0           | 0           | 0           | 0           | 0           | 0           | 0           |
| 0           | 0           | 0           | 0           | 0           | 4.55E-05    | 0           | 0           | 0           | 0           | 0           |
| 0           | 8.50E-05    | 0           | 0           | 0           | 0           | 0           | 0           | 0           | 0           | 0           |
| 0           | 7.62E-05    | 0           | 0           | 0           | 0           | 0           | 0           | 0           | 0           | 0           |
| 0.005724041 | 0.02463316  | 0.002751944 | 0           | 0.003181288 | 0.009620135 | 8.20E-05    | 0.006288992 | 0           | 0.000225698 | 0           |
| 0.000124703 | 0.002191454 | 0           | 0           | 0.000256097 | 0.000110667 | 9.32E-05    | 0           | 0           | 0           | 0           |
| 0           | 0.000235265 | 0.000268138 | 0           | 5.69E-05    | 0.000498002 | 7.39E-05    | 0           | 0           | 0           | 0           |
| 0.262074671 | 0.0195401   | 0.037054808 | 0.000127885 | 0.010209715 | 0.008681441 | 0.030665981 | 0.030689095 | 0.000696797 | 0.027648057 | 0.029975514 |
| 0.046459753 | 0.035888868 | 0.091331612 | 0.000139921 | 0.007042654 | 0.033611187 | 0.017254738 | 0.116184221 | 0.017141874 | 0.023587144 | 0.08049245  |
| 0.0067726   | 0.002391865 | 0.057635586 | 0.000103812 | 0.003474376 | 0.001831936 | 0.0004726   | 0.00130621  | 0.002466099 | 0.012917915 | 0.002154469 |
| 0.003324827 | 0.001187219 | 0           | 0.000150453 | 0.000335771 | 0.000466383 | 0.055369802 | 0.018124812 | 0.00255713  | 0.000116168 | 0.001787172 |
| 0           | 0.000193876 | 0.017264332 | 0           | 0.006749566 | 0.000622503 | 0.005692102 | 0.006241037 | 0           | 4.81E-05    | 0.000136036 |
| 0           | 0           | 0.00074326  | 0           | 0.006208918 | 0.000100786 | 0.000787667 | 0.003126227 | 0           | 0           | 7.31E-05    |
| 0           | 0           | 0.030892335 | 0           | 0.00729306  | 0.000954504 | 3.38E-05    | 0.000182687 | 0           | 0           | 0           |
| 0.000491786 | 0.000557666 | 0.004770036 | 0.000240724 | 0.007534929 | 0.001420887 | 0.0348583   | 0.000399627 | 8.77E-05    | 0.002739912 | 0.007601007 |
| 0           | 0           | 0           | 0           | 0.005235751 | 0.000401168 | 4.18E-05    | 0           | 0           | 0.00010953  | 0           |
| 5.27E-05    | 0.001537939 | 0           | 6.02E-05    | 0.003491449 | 0.001114576 | 0.000602807 | 0.000443015 | 0           | 0.002476044 | 0           |
| 0.004571856 | 6.75E-05    | 0           | 0           | 0           | 0           | 0.000128599 | 0           | 7.45E-05    | 0           | 0           |
| 0           | 0.032915374 | 0           | 0           | 0.000173577 | 0.001974222 | 0           | 0           | 0           | 5.97E-05    | 0           |
| 5.97E-05    | 0.037187184 | 0           | 0           | 0.001863814 | 0.003768611 | 0           | 0           | 0.010109352 | 0           | 0           |
| 0.000254675 | 0.056592224 | 0           | 0           | 0.000546339 | 0.005035354 | 0           | 0           | 0.002954354 | 0           | 0           |
| 0.0027944   | 0.006380485 | 0.000310476 | 0           | 0.000867883 | 0.000994028 | 0.009892459 | 0.004108169 | 0           | 6.64E-05    | 0.009796286 |
| 0.014344352 | 0.014932819 | 0.002154513 | 0           | 0.066104203 | 0.025247914 | 0.002202254 | 0.00429999  | 0           | 0.001968223 | 0.001052578 |
| 0.000108896 | 0.006922903 | 0.003363487 | 0           | 0.096363429 | 0.000438716 | 0.109969619 | 0.003009765 | 0           | 0.001048834 | 0.056840906 |
| 0           | 0           | 0           | 0           | 0.000967476 | 0.001369506 | 0           | 0           | 0           | 0           | 0           |
| 0.000890484 | 0           | 0           | 0           | 0.001445523 | 0.000968337 | 0.000181646 | 8.68E-05    | 0           | 4.81E-05    | 0.00235002  |
| 0.162400128 | 0.022304468 | 0.02592002  | 0.00015948  | 0.008294682 | 0.022823118 | 0.276069379 | 0.153835966 | 5.30E-05    | 0.138975462 | 0.100163243 |
| 0.064077997 | 0.003481057 | 0.003024786 | 5.72E-05    | 0.003411775 | 0.003804182 | 0.048012345 | 0.033678307 | 0           | 0.020015799 | 0.03314515  |
| 0.005485174 | 0.000141595 | 0.000597431 | 5.27E-05    | 0.00030447  | 9.88E-05    | 0.003677924 | 0           | 0           | 0           | 0.185675418 |
| 0.00216386  | 0.004663919 | 0.014785231 | 0           | 0.003295109 | 0.017137595 | 0.181039721 | 0.010917818 | 0.000261506 | 0.001510188 | 0.061920147 |
| 0.000310879 | 0.00095631  | 0.001862854 | 0           | 0.00049512  | 0.002333891 | 0.069502805 | 0.000771852 | 4.14E-05    | 0.000411568 | 0.004519793 |
| 0           | 0           | 0.005249862 | 0           | 0.000125203 | 0           | 0.000393834 | 0.000938553 | 0           | 0           | 0           |
| 0           | 0.000631731 | 0.011572277 | 0           | 0.000133739 | 0           | 0.000138244 | 0.000292299 | 0.00016551  | 0           | 0           |
| 0.006449426 | 0.078491513 | 0.001241903 | 0.002327502 | 0.00013943  | 0.029674599 | 0.001506213 | 0.001226285 | 0.000539563 | 0.002374812 | 0           |
| 0.000588387 | 0.006739918 | 0.000329292 | 0.000195588 | 0           | 0.002112556 | 0.000149496 | 0.000356239 | 0           | 0.000124466 | 0           |
| 0.060429997 | 0.020274215 | 0.05815775  | 0.000103812 | 0.016603591 | 0.10411405  | 0.020177145 | 0.187770034 | 0.029700774 | 0.017380438 | 0.026571215 |
| 0.120545602 | 0.430537886 | 0.430935614 | 0.84117016  | 0.253788806 | 0.54701179  | 0.007320484 | 0.130904208 | 0.819208432 | 0.036551527 | 0.218689634 |
| 0.019451904 | 0.164903628 | 0.041533186 | 0.053282801 | 0.047747773 | 0.129751276 | 0.00159784  | 0.032383514 | 0.057584249 | 0.002278558 | 0.013010135 |
| 0.016097219 | 0.000736294 | 0.001717025 | 0           | 0.003070313 | 0.001464363 | 0.015648861 | 0.019351097 | 0           | 0.010329022 | 0.013537274 |
| 0.023298376 | 0.00109137  | 0.001524154 | 0           | 0.007759725 | 0.001525625 | 0.020284846 | 0.02556473  | 0           | 0.009759797 | 0.011595361 |
| 0.000706065 | 0.000389931 | 0.005485071 | 0           | 0.003898358 | 0.001782531 | 0.000120561 | 0.001603076 | 0           | 0.000713605 | 0.002072847 |
| 0.000410993 | 0           | 0.003857426 | 0.004509066 | 0.000284552 | 0           | 0           | 0           | 0.001992741 | 0.001088663 | 0           |
| 0.000159831 | 0           | 0.005395692 | 0.005756318 | 0.000147967 | 5.53E-05    | 0           | 0           | 0.003298615 | 0.001068748 | 0           |
| 9.66E-05    | 0.000281011 | 0.000964356 | 0.000415249 | 0.00013943  | 7.90E-05    | 0           | 0.000205523 | 0.000642179 | 0.001055472 | 0.000117331 |
| 0.003602335 | 0.004476578 | 0.00397503  | 0.006057223 | 0.003958114 | 0.004495852 | 0           | 0.001514017 | 0.007070588 | 0.001306064 | 0.004057271 |
| 0.0001651   | 0.000287547 | 0.002206259 | 0.003648476 | 0.002578038 | 0.000482192 | 0           | 0.000472702 | 0.00519536  | 0.000331909 | 0.000433614 |
| 0           | 0           | 0.000376334 | 0           | 0.001533734 | 0           | 5.30E-05    | 0           | 0           | 6.80E-05    | 0           |
| 0.000337225 | 0           | 0           | 0.000153462 | 0.000193495 | 4.94E-05    | 0           | 0.001100688 | 0.000153924 | 0.001714312 | 0.000409808 |
| 0.007533112 | 0.00072758  | 0.019014287 | 0.002515568 | 0.012702387 | 0.001891222 | 0.005086081 | 0.00735771  | 0.000226749 | 0.001243001 | 0.003281866 |
| 0.103410362 | 0.005681224 | 0.021888539 | 0.049184471 | 0.284267137 | 0.019003126 | 0.024735971 | 0.169334655 | 0.037378785 | 0.620808399 | 0.104666032 |
| 0.003393325 | 0.001439911 | 0.051313171 | 5.42E-05    | 0.092012634 | 0.005189498 | 0.016287032 | 0.003107959 | 0           | 0.029128373 | 0.00030438  |
| 0.033411609 | 0.007413039 | 0.028394417 | 0.029284101 | 0.016037333 | 0.003628301 | 0.028275651 | 0.015334271 | 0.000398879 | 0.01821685  | 0.004336145 |
| 0.017367082 | 0.000320222 | 0.009836436 | 0.000201607 | 0.007674359 | 0.00197027  | 0.011519234 | 0.007487874 | 0           | 0.010485019 | 0.019184465 |

| SC24        | SC25         | SC26        | SC27        | SC28        | SC29        | SC30        | SC31        | SC32        | SC33        | SC34        |
|-------------|--------------|-------------|-------------|-------------|-------------|-------------|-------------|-------------|-------------|-------------|
| 0           | 0.000125401  | 0           | 0           | 0           | 0           | 0           | 0.000115374 | 0           | 0           | 0           |
| 0           | 0.000108398  | 0           | 0           | 0           | 0           | 0           | 9.32E-05    | 9.68E-05    | 4.25E-05    | 9.35E-05    |
| 0           | 4.89E-05     | 0           | 0           | 4.92E-05    | 8.93E-05    | 0           | 0.000448182 | 0           | 4.92E-05    | 0           |
| 0           | 2.98E-05     | 0           | 0           | 0.000100184 | 0           | 0.000110606 | 0           | 0.000225096 | 3.58E-05    | 6.32E-05    |
| 0           | 0            | 0           | 0           | 0           | 0           | 0           | 0           | 0           | 0           | 0           |
| 0           | 4.68E-05     | 0           | 0           | 0           | 9.06E-05    | 0           | 0.000678929 | 0           | 0           | 0.000260317 |
| 0           | 0            | 0           | 0           | 0           | 0           | 0           | 0           | 0           | 0           | 0           |
| 0           | 0            | 0           | 0           | 0           | 0           | 0           | 0           | 3.60E-05    | 0           | 9.10E-05    |
| 0           | 0            | 0           | 0           | 6.68E-05    | 0           | 0           | 0           | 0           | 0           | 6.32E-05    |
| 0.003793751 | 0.006799309  | 8.97E-05    | 0.000158402 | 0           | 0           | 0.004672575 | 0.002085598 | 0.000168822 | 0.001427338 | 0.002322631 |
| 0           | 0.000248677  | 0.000108844 | 0.000128434 | 0           | 0           | 0.001016322 | 0           | 0.000285872 | 7.61E-05    | 0           |
| 0.000335248 | 0.000303939  | 0           | 0.000145559 | 0           | 0           | 0           | 0           | 0           | 0           | 0           |
| 0.09375779  | 0.032493852  | 0.050167371 | 0.000308242 | 0.026891406 | 0.001476666 | 0.037996239 | 0.000332808 | 0.031722772 | 0.008407422 | 0.008416062 |
| 0.436120861 | 0.020706116  | 0.028686983 | 0.079838858 | 0.02208259  | 3.28E-05    | 0.047291305 | 0           | 0.043938729 | 0.017087784 | 0.000737985 |
| 0.029920199 | 0.002828972  | 0.011516421 | 0.00241884  | 0.028279917 | 0.00103787  | 0.004025636 | 0.017971645 | 0.007090522 | 0.002040332 | 0.001195435 |
| 0.001767934 | 0.00142405   | 0.00012412  | 0           | 0.010037701 | 0           | 7.72E-05    | 8.87E-05    | 0           | 0           | 0.000166805 |
| 0.000475652 | 0.000350699  | 0           | 0.003373533 | 0           | 0           | 0.001350226 | 0           | 0.0002341   | 0           | 0.007364686 |
| 0.000610324 | 0.0006318958 | 0           | 0.000321085 | 0           | 0           | 0.000770067 | 0           | 0.000213841 | 0           | 0.03955549  |
| 6.88E-05    | 0.000250803  | 0           | 0           | 0           | 0           | 0.00049877  | 0.000115374 | 0           | 0           | 0.003674761 |
| 0.014834023 | 0.007058613  | 0.000509847 | 0.180402683 | 0.022873514 | 0.000398069 | 0.000137736 | 7.10E-05    | 0.000130556 | 4.47E-05    | 0.000465032 |
| 0           | 0.000227423  | 0           | 0           | 0           | 0           | 7.51E-05    | 0           | 4.28E-05    | 0           | 0           |
| 0           | 0.003364585  | 4.77E-05    | 0           | 0.00260126  | 0.000115611 | 0.000191995 | 0           | 0.000542481 | 9.84E-05    | 0.000169332 |
| 7.74E-05    | 5.74E-05     | 0           | 0           | 0           | 0           | 5.43E-05    | 0           | 9.45E-05    | 0           | 6.57E-05    |
| 0           | 0            | 0           | 0           | 0           | 0           | 0           | 0           | 0.000432184 | 0           | 7.83E-05    |
| 0.000220634 | 0.001100982  | 0           | 0           | 0           | 0           | 0           | 0           | 0           | 0           | 0           |
| 0.000297999 | 0.002484649  | 4.01E-05    | 0           | 0           | 0           | 0.00014817  | 0           | 3.38E-05    | 0           | 0           |
| 0.003816674 | 0.042498337  | 0.003116365 | 0.001108814 | 0.001223295 | 0.000114297 | 0.001431615 | 0           | 0.009071367 | 9.40E-05    | 6.32E-05    |
| 0.004724996 | 0.078210118  | 0.004447313 | 0.000115591 | 0.002778779 | 0.000102473 | 0.004499362 | 0.000124248 | 0.005609391 | 0.000711432 | 0.00099072  |
| 0.023799768 | 0.023169511  | 5.35E-05    | 0.000132715 | 0.000418311 | 0.000332381 | 0.03066495  | 0           | 0.016146132 | 0.000472051 | 0.002984795 |
| 0           | 0.012423245  | 0           | 0           | 0.000166973 | 0           | 0.001099798 | 0           | 0.000252107 | 0           | 7.08E-05    |
| 0           | 0.041418609  | 0           | 0           | 0.00011776  | 0           | 0.000569724 | 0           | 0.000123803 | 0.000138707 | 0           |
| 0.120018911 | 0.056020438  | 0.055584729 | 0.014915469 | 0.011255723 | 0.112869068 | 0.046226984 | 0.179277141 | 0.434495954 | 0.042990161 | 0.041701207 |
| 0.001836703 | 0.01010013   | 0.022316766 | 0.010231909 | 0.00901653  | 0.04780116  | 0.006974429 | 0.001459919 | 0.039713678 | 0.002190225 | 0.007119533 |
| 0.008885514 | 0.008055449  | 0.001317581 | 0.014483075 | 0.008977863 | 0           | 0.007827972 | 0.007175346 | 0.000171073 | 0.002583974 | 0           |
| 0.037977621 | 0.027037827  | 0.001464615 | 0.000659295 | 0.002297194 | 0.000465071 | 0.022728458 | 0.000244059 | 0.032391307 | 0.035001096 | 0.003176874 |
| 0.003621828 | 0.001940534  | 0.000156582 | 0           | 0.000344491 | 3.28E-05    | 0.003706339 | 0.000860864 | 0.002386017 | 0.005991239 | 0.000179442 |
| 0.000532959 | 5.10E-05     | 0           | 0.000196932 | 6.50E-05    | 0           | 0           | 0           | 0           | 0           | 0.000179442 |
| 0.000796573 | 0            | 0.000101205 | 0           | 0.000724135 | 7.23E-05    | 0.000156518 | 0           | 0.000119301 | 0.000161079 | 0.001213126 |
| 0           | 0.066898482  | 0.001185823 | 0.001716735 | 0.000108972 | 0.0001432   | 0.013468871 | 0.232411085 | 0.05790143  | 0.01025088  | 0.023645848 |
| 0           | 0.005324248  | 5.16E-05    | 0           | 6.15E-05    | 0           | 0.001254229 | 0.016880034 | 0.004801297 | 0.000666688 | 0.003336097 |
| 0.010091835 | 0.035197422  | 0.048097432 | 0.134594555 | 0.031462945 | 0.000547838 | 0.151509144 | 0           | 0.026007586 | 0.003454247 | 0.016513678 |
| 0.052393301 | 0.087039229  | 0.119538961 | 0.042306161 | 0.105370372 | 0.00129274  | 0.482281152 | 0.237234585 | 0.048521682 | 0.79769165  | 0.232192321 |
| 0.011581828 | 0.008639947  | 0.01461942  | 0.005488413 | 0.012150346 | 0.000462444 | 0.083532459 | 0.178030219 | 0.006284679 | 0.049184986 | 0.018527973 |
| 0.000553017 | 0.000352824  | 0.011121147 | 0.002286125 | 0.000871774 | 0.002502713 | 0.000300514 | 0           | 0.00875173  | 8.73E-05    | 0.004261105 |
| 0.009243685 | 0.003779047  | 0.017395887 | 0.00014984  | 0.000230247 | 0.000168161 | 0.003188787 | 0           | 0.015139953 | 0.000163316 | 0.0034473   |
| 5.73E-05    | 0.001309276  | 0.002052753 | 0           | 7.21E-05    | 0           | 0.001325183 | 0           | 0.000308381 | 0.000105149 | 0.001486079 |
| 0.000338114 | 3.83E-05     | 0           | 0.000273993 | 5.10E-05    | 2.89E-05    | 0.000141909 | 0           | 8.78E-05    | 0.001633161 | 0.00098061  |
| 0.001959913 | 0.000148781  | 0           | 0.000158402 | 8.79E-05    | 0           | 6.68E-05    | 0           | 0.000218343 | 0.001445235 | 0.002499545 |
| 0.000209172 | 0.000208294  | 0.000322712 | 0.000154121 | 0.000613405 | 2.89E-05    | 7.10E-05    | 0           | 0.000148563 | 0           | 7.83E-05    |
| 0.000449863 | 0.000212545  | 0.006303384 | 0.000393864 | 0.002172404 | 0.000162906 | 0.005816198 | 0           | 0.000605508 | 0.001228226 | 0.000859298 |
| 0           | 0.000278434  | 0.000374269 | 0           | 0.001031716 | 0           | 0.000377729 | 0           | 8.78E-05    | 0.001319952 | 0.00303787  |
| 0           | 0.000255054  | 0           | 0.00033821  | 0.000435887 | 0.000289027 | 0           | 0           | 0.000110297 | 0           | 0.000576235 |
| 0           | 0.000257179  | 0.003072446 | 0.001524084 | 0.00085244  | 0.000475581 | 0           | 0           | 0.000274617 | 0           | 0           |
| 0.000876803 | 0.008860994  | 0.005927205 | 0.024582268 | 0.006336178 | 0.002144056 | 0.000671983 | 0.000945175 | 0.002692148 | 0.000161079 | 0           |
| 0.016260978 | 0.316081779  | 0.555030008 | 0.262801659 | 0.507254528 | 0.691893049 | 0.016321667 | 0.083312995 | 0.134947271 | 0.002447504 | 0.030911967 |
| 0.058691385 | 0.047055298  | 0.00165175  | 0.036757812 | 0.026944134 | 0.038761177 | 0.003478867 | 0           | 0.01412252  | 0.000845664 | 0.209484118 |
| 0.04275706  | 0.021220475  | 0.011596622 | 0.09132942  | 0.091397386 | 0.091553311 | 0.010920762 | 0.039138249 | 0.030601794 | 0.008975673 | 0.279377869 |
| 0.006243642 | 0.009539012  | 0.021808829 | 0.086204904 | 0.062126179 | 0.004515393 | 0.00097041  | 0.000905238 | 0.022617641 | 0.000695771 | 0.046321195 |

| SC35        | SC36        | H002         | H003        | H004        | H005        | H006        | H008        | H009        | H010        | H011        |
|-------------|-------------|--------------|-------------|-------------|-------------|-------------|-------------|-------------|-------------|-------------|
| 0           | 0           | 0.007234204  | 0.011507954 | 0.002229053 | 0.001024829 | 0.021390831 | 0.00259256  | 0.007214765 | 0.062575589 | 0.008393219 |
| 0.000169313 | 0           | 0.000422834  | 0.001908409 | 0.000402668 | 5.06E-05    | 0.001102008 | 0.00038904  | 0.002154515 | 0.007181837 | 0.003589858 |
| 0           | 0           | 0.003066267  | 0.007489106 | 0.000686692 | 9.46E-05    | 0.008051709 | 0.000547768 | 0.013134915 | 0.024084326 | 0.032185386 |
| 0.000822895 | 0           | 0.001769     | 0.005286976 | 0.000327167 | 0           | 0.004842157 | 0.000774967 | 0.007927852 | 0.015378413 | 0.020693437 |
| 0           | 0           | 0.000480363  | 0.001627121 | 0.000111453 | 0           | 0.001250427 | 0.000199188 | 0.001714079 | 0.004530929 | 0.005545559 |
| 0           | 0           | 0.004176566  | 0.013386835 | 0.000744216 | 0.000195729 | 0.008868011 | 0.000547768 | 0.019760525 | 0.037264137 | 0.050887884 |
| 0           | 0           | 0.001340413  | 0.0050865   | 0.000273239 | 4.40E-05    | 0.004048117 | 0.000516645 | 0.007254805 | 0.013502325 | 0.016597035 |
| 0           | 0           | 0.001231109  | 0.003308634 | 0.000172572 | 4.40E-05    | 0.004916366 | 0.00051042  | 0.006829622 | 0.01163607  | 0.01825762  |
| 0           | 0           | 0.00051488   | 0.001784083 | 0.000237286 | 9.46E-05    | 0.001217033 | 0.000177402 | 0.003430064 | 0.005850483 | 0.006129186 |
| 0.043003568 | 0           | 0.005163179  | 0.038499195 | 0.002797102 | 0.000530008 | 0.017862178 | 0.000314344 | 0.002699817 | 0.001958683 | 0.040748188 |
| 0           | 0.000102741 | 0.008137401  | 0.000281288 | 0.000179762 | 0.000316685 | 0.019465099 | 0           | 0.000289811 | 0.001366752 | 0.001482193 |
| 0.000114696 | 0           | 0.001130434  | 0.001487253 | 0.000151    | 3.74E-05    | 0.00646734  | 0.000361029 | 0.000142999 | 0.001095368 | 0.009346844 |
| 0.000544349 | 0.05370183  | 0.107247436  | 0.084848042 | 0.223538083 | 0.327010622 | 0.106182377 | 0.050730772 | 0.311884152 | 0.038896373 | 0.021017185 |
| 0.001898849 | 0.206473461 | 0.103286601  | 0.07888815  | 0.216836542 | 0.00955774  | 0.091748668 | 0.033323581 | 0.038802242 | 0.077688518 | 0.025325014 |
| 0.000790125 | 0.003590001 | 0.019709251  | 0.022882257 | 0.065282497 | 0.001361307 | 0.010563694 | 0.038343749 | 0.056194707 | 0.028033156 | 0.024096094 |
| 0.000731867 | 0.127726583 | 0.004044251  | 0.000435142 | 0.020395837 | 0.001609817 | 0.013602565 | 0.001185793 | 0.025053386 | 0.000318581 | 0.008679527 |
| 0           | 0.001784134 | 0.007918793  | 0           | 0.020794909 | 0.001213961 | 0.016849222 | 0.0006318   | 0.01996835  | 0.002605677 | 0.000224641 |
| 0           | 0.000387254 | 0.021832051  | 0.000234666 | 0.004573154 | 0.002504893 | 0.011324339 | 0.000329906 | 0.009821156 | 0.000574232 | 0.000475711 |
| 0           | 0.000106692 | 0.00012081   | 0           | 0.000679502 | 0           | 0.003291182 | 0.002816647 | 0.005702791 | 0.007136606 | 0.000449283 |
| 0.000100131 | 0.000189675 | 0.204418761  | 0.093731157 | 0.141048734 | 0.097235601 | 0.022548496 | 0.180981251 | 0.105693258 | 0.202308729 | 0.198726151 |
| 7.46E-05    | 0           | 0.015420504  | 0.017508252 | 0.001100146 | 0.006738361 | 0.005895929 | 0.086702936 | 0.002114475 | 0.01376781  | 0.005171157 |
| 0.0001948   | 0           | 0.04459894   | 0.003142347 | 0.01367632  | 0.028086033 | 0.031553794 | 0.0014908   | 0.050036226 | 0.011286025 | 0.00156368  |
| 0           | 0           | 0.000934838  | 0.000257977 | 0.000647144 | 0.000145147 | 0.004404322 | 4.05E-05    | 0.00548162  | 0           | 0.002349925 |
| 0           | 9.68E-05    | 0.004392298  | 0.087443354 | 0.000884431 | 0           | 0           | 0.009022608 | 0.000209732 | 0           | 0.014352824 |
| 0           | 0           | 0.00239606   | 0.068774205 | 0.000503335 | 6.38E-05    | 0.028718999 | 0.001587282 | 0.003422437 | 0.002468019 | 0.003440097 |
| 0           | 0           | 0.002278127  | 0.00938819  | 0.000129429 | 0           | 0.035820829 | 0.000115156 | 0.002884762 | 0.000239919 | 0.004431162 |
| 9.28E-05    | 0.000774508 | 0.019666105  | 0.001669081 | 0.005227489 | 0.046513162 | 0.014448551 | 0.000513532 | 0.024336486 | 0.003400163 | 0.005404608 |
| 0.000169313 | 0.002141751 | 0.029025986  | 0.00614172  | 0.014665013 | 0.023694223 | 0.047809341 | 0.005490128 | 0.021733908 | 0.042302436 | 0.020999566 |
| 0.004338407 | 0.138216024 | 0.021403464  | 0.0010288   | 0.018587427 | 0.005333069 | 0.06279962  | 0.000700271 | 0.007607535 | 0.004121887 | 0.007177513 |
| 0           | 0           | 0.013691774  | 0           | 0.001402146 | 0.003257021 | 0.042904107 | 0           | 0.001266016 | 0           | 0.004439971 |
| 0           | 0.000784387 | 0.011264073  | 0.002155507 | 0.001258336 | 0.001939698 | 0.038588836 | 0           | 0.000741687 | 0           | 0.002600995 |
| 0.068016312 | 0.151084311 | 0.0181115713 | 0.002788017 | 0.036204138 | 0.070787975 | 0.01723882  | 0.003638299 | 0.045689063 | 0.002055044 | 0.001314813 |
| 0.019835057 | 0.047211377 | 0.004029869  | 6.84E-05    | 0.001024645 | 0.017246157 | 0.004422874 | 0.000666036 | 0.013165421 | 0.000316614 | 0.001121005 |
| 0.001587533 | 0.046320298 | 0.000569532  | 0.00011811  | 0.000291215 | 0           | 0.005127863 | 0           | 0           | 0           | 0           |
| 0.007324133 | 9.68E-05    | 0.0007076    | 0.000341897 | 0.019701954 | 0.012313343 | 0.037483117 | 8.40E-05    | 0.006865848 | 0.000521135 | 0.002037189 |
| 0.001290781 | 0           | 0            | 0           | 0.000399072 | 0.000972048 | 0.002367277 | 0           | 0.000545302 | 0           | 0.000387617 |
| 6.74E-05    | 0.000102741 | 0.000138068  | 0           | 0.011972173 | 0           | 0.00391083  | 0           | 0.000701647 | 0           | 6.39E-05    |
| 0.000112875 | 0           | 0.00126275   | 0           | 0.000237286 | 5.50E-05    | 0           | 0           | 9.91E-05    | 0           | 0           |
| 0.062414433 | 0.000920716 | 0.000293395  | 0.000951096 | 0.000190548 | 0.000127554 | 0.000897933 | 6.85E-05    | 4.96E-05    | 0.002690239 | 0.000682734 |
| 0.003896009 | 0.000100765 | 0            | 0           | 0           | 0           | 0           | 0           | 0           | 0           | 0           |
| 0.027201063 | 0.030567366 | 0.002096912  | 0.021808388 | 0.002193101 | 0.018941743 | 0.00869733  | 0.00617795  | 0.007632322 | 0.01185829  | 0.003081111 |
| 0.533997233 | 0.054579079 | 0.089212263  | 0.230491648 | 0.033399845 | 0.055767412 | 0.072940321 | 0.084583447 | 0.053807581 | 0.183268601 | 0.118513755 |
| 0.05086841  | 0.00435463  | 0.018492524  | 0.018411172 | 0.004774488 | 0.003637483 | 0.02361711  | 0.017323158 | 0.005313835 | 0.024969273 | 0.029606415 |
| 0.000842922 | 0.004550232 | 0            | 0           | 0           | 0.00102263  | 0           | 0           | 0.000257398 | 7.08E-05    | 0           |
| 8.37E-05    | 0.003163231 | 0.000158203  | 0.000132097 | 0           | 0.000365068 | 0.000233759 | 4.98E-05    | 4.19E-05    | 0           | 0           |
| 0           | 8.69E-05    | 0            | 0           | 0           | 0.000153944 | 0           | 0           | 0           | 0           | 0           |
| 0.001824206 | 0           | 0            | 0           | 0           | 0.000351873 | 0           | 0           | 0           | 0           | 0           |
| 0.002204704 | 0.000100765 | 0            | 0           | 0           | 0.000323283 | 0           | 0           | 0           | 0           | 0           |
| 7.10E-05    | 0.000286489 | 0            | 0           | 0           | 0.000349673 | 0           | 0           | 0           | 0           | 0           |
| 0.002414069 | 0.003785604 | 0            | 0           | 0           | 0.000268303 | 0           | 0           | 0           | 0           | 0           |
| 0.001168803 | 0.000162014 | 0            | 0           | 0           | 0.000107761 | 0           | 0           | 0           | 0           | 0           |
| 0           | 0           | 0            | 0           | 0           | 0.000301291 | 0           | 0           | 0           | 0           | 0           |
| 0.000134722 | 0.000296368 | 0            | 0           | 0           | 0           | 0           | 0.000130717 | 0           | 0           | 0           |
| 0.000628095 | 0.002829324 | 0.017301685  | 0.004876699 | 0.006065182 | 0.002377339 | 0.017320451 | 0.037531434 | 0.010644829 | 0.01047974  | 0.013106284 |
| 0.114766604 | 0.007075285 | 0.123660306  | 0.14095495  | 0.088371173 | 0.137610785 | 0.088071597 | 0.301901003 | 0.043706147 | 0.111890739 | 0.245004482 |
| 0.001194291 | 0.006956738 | 0.033320485  | 0.000975962 | 0.008168401 | 0.025702096 | 0.016329756 | 0.064085726 | 0.025244051 | 0.018587821 | 0.00099547  |
| 0.042568453 | 0.059180682 | 0.015268054  | 0.004551897 | 0.020190908 | 0.040197049 | 0.008144471 | 0.027836566 | 0.013167328 | 0.00512286  | 0.004208723 |
| 0.002441378 | 0.040112383 | 0.007055866  | 0.003347486 | 0.007273185 | 0.052323459 | 0.004660344 | 0.034985559 | 0.007559869 | 0.006595805 | 0.015095021 |

| H013        | H014        | H015        | H016        | H017        | H018        | H019        | H020        | H021        | H023        | H024        |
|-------------|-------------|-------------|-------------|-------------|-------------|-------------|-------------|-------------|-------------|-------------|
| 0           | 0           | 0.000243071 | 0.000151643 | 0.000652328 | 0.002798961 | 0.001070155 | 0.003407092 | 0.003098123 | 0.0009686   | 0.000250229 |
| 0.000113138 | 0           | 4.29E-05    | 0           | 0           | 0.00018958  | 0.000105104 | 0.000703235 | 0.000432766 | 0.000179984 | 0           |
| 0           | 0.000557012 | 0.000300265 | 0.000909859 | 0.000187065 | 0.003627572 | 0.000243651 | 0.002102742 | 0.000250762 | 0.000258135 | 0.000184379 |
| 0           | 0.00060564  | 6.43E-05    | 0.000178722 | 0.000172675 | 0.001580539 | 0.0001696   | 0.000784467 | 0.000208294 | 0           | 0.00108652  |
| 0           | 0.000190091 | 5.48E-05    | 0           | 0           | 0.000359988 | 0           | 0.000322606 | 0.000141559 | 9.24E-05    | 0           |
| 0           | 0.00091067  | 6.20E-05    | 0.00019497  | 0.000177472 | 0.004690495 | 0.000554187 | 0.00255764  | 0.000766442 | 0           | 0           |
| 0           | 0           | 6.43E-05    | 0           | 0           | 0.00140374  | 0.000131381 | 0.000719481 | 0.000254806 | 0           | 0           |
| 0           | 0.000207774 | 0           | 0           | 0.00012471  | 0.001684915 | 3.82E-05    | 0.000902833 | 7.68E-05    | 9.24E-05    | 0.000269984 |
| 0           | 0           | 0           | 0           | 0           | 0.000937247 | 0           | 0.000394554 | 2.83E-05    | 0           | 0           |
| 0.001680519 | 0.00078689  | 0.007930796 | 0.002469617 | 0.002518179 | 0.002215311 | 0.002056704 | 0.082656789 | 0.011913212 | 0.016054128 | 0.000256814 |
| 0.001815733 | 0           | 0.000293115 | 0.000384524 | 0.006259473 | 7.03E-05    | 0           | 0.001845121 | 0.008778688 | 0.002822912 | 0.000737517 |
| 0           | 0.000137043 | 0.005600172 | 0.000400771 | 0.032659581 | 0.002110936 | 0.000895777 | 0.00155965  | 0.032973166 | 0.000918867 | 0.006525704 |
| 0.244309966 | 0.059379241 | 0.284510164 | 0.15578627  | 0.18462328  | 0.182535253 | 0.133989122 | 0.139665232 | 0.167753639 | 0.145216561 | 0.005050671 |
| 0.052758369 | 0.046444186 | 0.102838215 | 0.029960356 | 0.179160031 | 0.130699101 | 0.034715537 | 0.066347774 | 0.015915291 | 0.068791903 | 0.044948999 |
| 0.011603585 | 0.016944657 | 0.041248242 | 0.02255692  | 0.051294104 | 0.076920291 | 0.032625391 | 0.058257092 | 0.009156854 | 0.025560142 | 0.036026366 |
| 0.008915858 | 0.004049388 | 0.021156733 | 0           | 0.013617352 | 0.070774933 | 0.001335305 | 0.002156123 | 0.008978894 | 0.044778205 | 0.010107928 |
| 0.002077883 | 0.001852286 | 0.018716488 | 0.00019497  | 0.011454116 | 0.013577302 | 0.000647348 | 0.004105685 | 0.004891879 | 0.00741488  | 0.004681913 |
| 0.006321953 | 0.007126216 | 0.006758335 | 0           | 0.001074423 | 0.016282537 | 5.26E-05    | 0.001123319 | 0.004099148 | 0.014595308 | 0           |
| 0.000811285 | 0.023885202 | 0.021542788 | 0.018435476 | 0.011554844 | 0.001508116 | 0.003296459 | 0.009042254 | 0.001193141 | 0.00339602  | 0.024021967 |
| 0.158015718 | 0.170206934 | 0.121597598 | 0.183098286 | 0.080754398 | 0.097925276 | 0.22181826  | 0.200844346 | 0.054405219 | 0.109352317 | 0.303277339 |
| 0.001134144 | 0.012749384 | 0.005573958 | 0.002994952 | 0.001798699 | 0.003915137 | 0.045354978 | 0.012702325 | 0.008426813 | 0.025460677 | 0.000533383 |
| 0.035169487 | 0.003620578 | 0.01393132  | 0.033811009 | 0.009924023 | 0.043153836 | 0.029252492 | 0.012827654 | 0.024750603 | 0.018050533 | 0.001119445 |
| 0.000353213 | 0           | 0           | 0           | 0           | 8.31E-05    | 0           | 0           | 0.000268962 | 0.000935445 | 0.000276569 |
| 0.00403159  | 0           | 0.000590997 | 0.001733065 | 0.000498839 | 7.46E-05    | 0.001509683 | 0.006041321 | 0.007454099 | 0.018550226 | 0.007032747 |
| 0.002820182 | 0           | 0.001703882 | 0.000157059 | 0.000623549 | 0.001572019 | 0.00056852  | 0.00688149  | 0.004198239 | 0.014216393 | 0           |
| 0.000115898 | 0.000366921 | 0.000121536 | 0.000200386 | 0.000335757 | 9.16E-05    | 0.000527911 | 0.000608078 | 0.000835199 | 0.009546274 | 0           |
| 0.006490281 | 0.000349238 | 0.014129114 | 0.004435562 | 0.002537365 | 0.002732927 | 0.011800368 | 0.018304995 | 0.017181234 | 0.003542849 | 0.000928481 |
| 0.024661413 | 0.005132467 | 0.019908014 | 0.028768874 | 0.059424224 | 0.017383803 | 0.012058352 | 0.018964133 | 0.044572926 | 0.021929669 | 0.003806112 |
| 0.04243518  | 0           | 0.000955604 | 0.012559303 | 0.036424858 | 0.016474247 | 0.00138308  | 0.003003254 | 0.035027796 | 0.016880635 | 0.001639657 |
| 0.009782333 | 0.001220121 | 0.000436098 | 0.013257945 | 0.040319641 | 6.82E-05    | 0.005850021 | 0.0115117   | 0.103360412 | 0.003969128 | 0.001079935 |
| 0.002425577 | 0           | 8.34E-05    | 0.002003856 | 0.00754974  | 0.000104375 | 0.000752453 | 0.000900512 | 0.006525876 | 0.002721079 | 0.003081766 |
| 0.031322781 | 0.000632164 | 0.04967948  | 0.026326336 | 0.006801481 | 0.033689771 | 0.024248085 | 0.014798104 | 0.037834712 | 0.018635482 | 0.001284069 |
| 0.007574754 | 0.000159146 | 0.010347211 | 0.005377916 | 0.00117515  | 0.002098155 | 0.006174889 | 0.003474398 | 0.00976758  | 0.00283949  | 0.000487288 |
| 0           | 0.000406707 | 4.77E-05    | 0           | 0.000681107 | 0.000438802 | 0           | 0.000392233 | 0.001225498 | 0.000532848 | 0.002713007 |
| 0.000110379 | 0.009168593 | 0.001970784 | 0           | 0.002815564 | 0.024008435 | 0.000570909 | 0.009016724 | 0.00604053  | 0.004097012 | 0.005445769 |
| 0           | 0.000972561 | 6.91E-05    | 0           | 0.000738666 | 0.00279683  | 0           | 0.000816959 | 0.000479279 | 0.000592054 | 0           |
| 0           | 0           | 5.72E-05    | 0           | 0.014068226 | 0.005725727 | 0           | 0           | 0           | 0.017671619 | 0.000888971 |
| 0           | 0           | 0.001441746 | 0           | 0           | 0           | 0           | 0           | 0           | 0.000395492 | 0.001185294 |
| 0           | 0           | 5.00E-05    | 0           | 0.000215844 | 5.33E-05    | 0           | 0.000246016 | 0.000483323 | 0           | 0           |
| 0           | 0           | 0           | 0           | 0           | 0           | 0           | 0           | 0           | 0           | 0           |
| 0.004117134 | 0.000941615 | 0.004358602 | 0.00350404  | 0.013248019 | 0.016689388 | 0.005938404 | 0.012235823 | 0.014594747 | 0.016335945 | 0.003898302 |
| 0.075330861 | 0.019959595 | 0.059030575 | 0.08750352  | 0.091306767 | 0.068495718 | 0.041951026 | 0.09644994  | 0.117795399 | 0.09787358  | 0.057328741 |
| 0.008926896 | 0.005539174 | 0.007060982 | 0.013853686 | 0.012288713 | 0.011928599 | 0.009810549 | 0.022542972 | 0.01128833  | 0.010216479 | 0.008007322 |
| 0.00293608  | 0           | 0.001389319 | 0.004208098 | 0.000378926 | 7.88E-05    | 0.00094594  | 4.41E-05    | 0.000368054 | 9.71E-05    | 0           |
| 0.000590527 | 0.001122865 | 0.000576699 | 0.002783735 | 0.000158286 | 0           | 5.02E-05    | 0.000215844 | 0           | 0.000793352 | 0.000283154 |
| 0           | 0           | 0.00017158  | 0.000167891 | 0.00012471  | 0           | 0           | 0           | 0           | 0           | 0.000243644 |
| 0.000118657 | 0.000764786 | 0           | 0.00038994  | 0           | 0           | 4.78E-05    | 0           | 0           | 0           | 0           |
| 0           | 0.001396951 | 0           | 0.000357445 | 0           | 0           | 4.54E-05    | 0           | 0           | 0           | 0           |
| 0.000482908 | 0.000216616 | 0.000152515 | 0           | 0           | 0           | 0.000126603 | 0           | 0           | 0           | 0.000474118 |
| 0.001164498 | 0.000406707 | 0.000245454 | 0.004105197 | 0.001275877 | 0           | 9.55E-05    | 0           | 0           | 0.000326814 | 0.002568138 |
| 0.000452554 | 0           | 7.63E-05    | 0.000509088 | 0.000724276 | 0           | 0           | 0           | 0           | 5.45E-05    | 0.000381928 |
| 0           | 0           | 0           | 0           | 0           | 0           | 0           | 0           | 0           | 0           | 0           |
| 0.000124176 | 0.000198933 | 0.000190644 | 0.000888196 | 0           | 0           | 8.12E-05    | 0           | 0           | 0.000108938 | 0.002614233 |
| 0.003992958 | 0.133581189 | 0.012730262 | 0.039297242 | 0.001611634 | 0.008739829 | 0.043776022 | 0.005779059 | 0.003652226 | 0.009934661 | 0.015250789 |
| 0.203356623 | 0.243374431 | 0.099451898 | 0.057359026 | 0.071904798 | 0.067963192 | 0.245968407 | 0.093003393 | 0.168803198 | 0.204869523 | 0.3499516   |
| 0.007497489 | 0.151012126 | 0.011746062 | 0.096591278 | 0.013583776 | 0.040003408 | 0.020533596 | 0.037410703 | 0.022865844 | 0.013044127 | 0.037389455 |
| 0.025497533 | 0.054481073 | 0.043712318 | 0.119326921 | 0.018620134 | 0.014190772 | 0.03497591  | 0.022134492 | 0.015031558 | 0.016167802 | 0.026642785 |
| 0.008559886 | 0.018942827 | 0.004985344 | 0.022806048 | 0.012557319 | 0.005553189 | 0.021856958 | 0.010195745 | 0.011850522 | 0.009117627 | 0.026036968 |

| H025        | H026        | H027        | H028        | H029        | H030        | H031        | H032        | H033        | H034        | H035        |
|-------------|-------------|-------------|-------------|-------------|-------------|-------------|-------------|-------------|-------------|-------------|
| 0.001200795 | 0.003335273 | 0.007716401 | 0.001224463 | 0.007709724 | 0.001829282 | 0.007953456 | 0.004265665 | 0.000873963 | 0.000349023 | 0.002841663 |
| 8.51E-05    | 0.001639138 | 0.008056419 | 0           | 0.001199792 | 0.000187549 | 0.000652132 | 0.000744423 | 0           | 0.00010887  | 0.000277533 |
| 0.000148918 | 0.002712243 | 0.018860981 | 0.000129867 | 0.004841515 | 0.000152214 | 0.00125951  | 0.000971886 | 0.000160082 | 0.000163305 | 0.001282937 |
| 0.000505847 | 0.002277891 | 0.012100629 | 0.000247366 | 0.00195919  | 0.000440332 | 0.000882297 | 0.000661171 | 0.000194695 | 0.001104707 | 0.000284515 |
| 4.02E-05    | 0.000581756 | 0.003088161 | 0           | 0.000999356 | 5.44E-05    | 0.000249345 | 0.000192014 | 0.000181715 | 0           | 9.08E-05    |
| 0.000127644 | 0.005369455 | 0.025425322 | 0           | 0.006120352 | 0.000184831 | 0.001178527 | 0.001586331 | 0           | 0           | 0.0053255   |
| 0.00018201  | 0.001175305 | 0.006716349 | 0           | 0.001388936 | 0           | 0.000545575 | 0.000321993 | 0           | 0           | 0.004156019 |
| 0.000139462 | 0.001845504 | 0.007904411 | 0           | 0.002142688 | 0.000225602 | 5.11E-05    | 0.000425385 | 0.000190368 | 9.93E-05    | 0.005334227 |
| 0.000111097 | 0.000713438 | 0.003876202 | 0           | 0.000976772 | 0.000146777 | 0.000379345 | 0.000443109 | 0           | 8.97E-05    | 0.000167567 |
| 0.0036993   | 0.002376161 | 0.004380228 | 0.001629526 | 0.028230405 | 0.037183613 | 0.028297423 | 0.011946224 | 0.002275766 | 0.000883766 | 0.001886878 |
| 0.00734187  | 0           | 0.000292015 | 0.000763744 | 0.004474519 | 0.01402268  | 0.018370522 | 0.099480971 | 0           | 0.000419468 | 0.001450505 |
| 0.000245832 | 0.000279086 | 0.001640085 | 0.001379067 | 0.000383934 | 0.005591132 | 0.006314601 | 0.167146702 | 0.03844573  | 0.000371438 | 0.00056554  |
| 0.197398435 | 0.106359227 | 0.071967742 | 0.107165275 | 0.03914428  | 0.052296251 | 0.034535303 | 0.192988831 | 0.144766388 | 0.047134166 | 0.112572089 |
| 0.184775903 | 0.016004198 | 0.140139287 | 0.082029764 | 0.142704699 | 0.065566017 | 0.061828954 | 0.009594791 | 0.044559146 | 0.106183157 | 0.118833173 |
| 0.04604624  | 0.006383598 | 0.137295139 | 0.051968572 | 0.030926409 | 0.004294599 | 0.020949215 | 0.012274125 | 0.007333504 | 0.030307397 | 0.074413863 |
| 0.018643054 | 0.000685922 | 0           | 0.003546615 | 0.000355703 | 0.006980082 | 0.046207617 | 0.020223504 | 0.02026989  | 0.00426513  | 0.029799059 |
| 0.008039182 | 0.016597747 | 0.135807062 | 0.024099664 | 0.002326185 | 0.008146147 | 0.000157705 | 0.001140268 | 0.016999018 | 0.027121358 | 0.016126611 |
| 0.011301184 | 0.00581953  | 0.002184114 | 0.000145328 | 0.000584369 | 0.00087251  | 0.000447542 | 0.018767152 | 0.011651401 | 0.001902017 | 0.004567956 |
| 0.071314942 | 0.000624995 | 0.003888202 | 0.007519936 | 0.001072755 | 0.006727298 | 0           | 0.015600398 | 0.002578624 | 0.013813641 | 3.49E-05    |
| 0.081453151 | 0.30573659  | 0.105289475 | 0.092558293 | 0.247865781 | 0.189848439 | 0.026577585 | 0.065976007 | 0.042897751 | 0.042974704 | 0.139292098 |
| 0.000624035 | 0.0286063   | 0.018512963 | 0.074707721 | 0.035338821 | 0.007534574 | 0.016188223 | 0.011721716 | 0.000930208 | 0.020646814 | 0.000384008 |
| 0.011213725 | 0.007008593 | 0.000680035 | 0.035197135 | 0.007224161 | 0.024199248 | 0.002158856 | 0.02182756  | 0.018764251 | 0.018866475 | 0.009750325 |
| 0.000222194 | 0           | 0           | 0.000126775 | 0.000293596 | 0.0003153   | 0.001101805 | 0.003757566 | 0.000177389 | 0           | 0.000607432 |
| 0.008346472 | 0.019139    | 0.001448075 | 0.044244559 | 0.000366995 | 0.0021174   | 0.000726723 | 0.005772236 | 0.108808425 | 0.003077169 | 0.000471283 |
| 0.003581112 | 0.001334502 | 0.00019201  | 0.001991299 | 0.005493637 | 0.030660172 | 0.000419837 | 0.016672722 | 0.042482402 | 0.000505924 | 0.008184617 |
| 0.004325699 | 0.000389148 | 0.000588031 | 0.000816309 | 0.000400872 | 0.00201683  | 0.000475247 | 0.005981974 | 0.022636513 | 0.000826129 | 0.000265315 |
| 0.002968895 | 0.031135762 | 0.001816094 | 0.000225722 | 0.000465802 | 0.005131774 | 0.003431153 | 0.009355512 | 0.02202647  | 0.001408902 | 0.005246952 |
| 0.028507066 | 0.00944175  | 0.004668243 | 0.008342429 | 0.015320641 | 0.059249152 | 0.031347101 | 0.050526266 | 0.01280659  | 0.008386167 | 0.084989806 |
| 0.010818975 | 0.003588808 | 0.000136007 | 0.007532304 | 0.001329652 | 0.007099678 | 0.013313301 | 0.0031638   | 0.015895747 | 0.004441242 | 0.041748705 |
| 0.017255521 | 0.000357702 | 0.000168009 | 0.001515119 | 0.020447283 | 0.04760481  | 0.005941649 | 0.002404606 | 0.008570897 | 0.003643932 | 0.040697918 |
| 0.002626148 | 4.13E-05    | 0           | 0.00053493  | 0.001177208 | 0.002739845 | 0.007135094 | 0.003701439 | 0.003777079 | 0.000870957 | 0.014327008 |
| 0.016203644 | 0.010927587 | 0.010128527 | 0.014201919 | 0.002631074 | 0.007300818 | 0.035195959 | 0.010445561 | 0.086327667 | 0.002587256 | 0.011844916 |
| 0.001690096 | 0.003712628 | 0.001104057 | 0.004161938 | 0.000784805 | 0.002408237 | 0.005189353 | 0.007423556 | 0.021360181 | 9.61E-05    | 0.000684233 |
| 0.000387658 | 0.000434352 | 0.003624188 | 0           | 0           | 0           | 0           | 0           | 0.000398043 | 9.93E-05    | 0           |
| 0.0104455   | 0.000165093 | 0.028549485 | 0.001156438 | 0.000626715 | 0.001562908 | 0.006235748 | 0.000508099 | 0.015454439 | 0.001517771 | 0.000830855 |
| 0.000789499 | 0           | 0.000992052 | 0.000126775 | 0           | 7.34E-05    | 0.001001641 | 0           | 0.010989439 | 0.000105668 | 0.000202477 |
| 0.00026947  | 0.000182782 | 0           | 0           | 0           | 0           | 0           | 0           | 0.038852426 | 0           | 0           |
| 8.98E-05    | 4.91E-05    | 0.000308016 | 0           | 0           | 0           | 0           | 0           | 0.000765799 | 0           | 0.000155349 |
| 0.000134735 | 5.31E-05    | 0.00058003  | 0           | 0.000412164 | 7.61E-05    | 0.000854592 | 0.000661171 | 0.000385063 | 0           | 0.000277533 |
| 0           | 0           | 0           | 0           | 0           | 0           | 0           | 0           | 0           | 0           | 0           |
| 0.026826426 | 0.008529807 | 0.007724402 | 0.007300399 | 0.015975586 | 0.010595155 | 0.034916779 | 0.01165968  | 0.01032315  | 0.006378482 | 0.01093726  |
| 0.051251262 | 0.041628997 | 0.108437639 | 0.054655589 | 0.10531635  | 0.178391646 | 0.465251582 | 0.112020962 | 0.101855658 | 0.069900736 | 0.074845    |
| 0.017217701 | 0.005811668 | 0.0115326   | 0.004282529 | 0.024870987 | 0.014134122 | 0.05158238  | 0.016501387 | 0.010401028 | 0.011415306 | 0.010101169 |
| 0.00020092  | 0.000650545 | 0.000140007 | 0.000355589 | 0.000169382 | 0.000809994 | 0.000247214 | 0.000410615 | 0           | 0           | 0           |
| 0.000130007 | 0           | 0           | 0           | 0           | 0.000108724 | 0           | 0.000747378 | 0.000194695 | 0           | 3.32E-05    |
| 0           | 0           | 0           | 0           | 0           | 0.00015765  | 0           | 0           | 0           | 0           | 0           |
| 0           | 0           | 0           | 0           | 0           | 0           | 0           | 0           | 0           | 0.000131284 | 0           |
| 0           | 0           | 0           | 0.000166972 | 0           | 6.25E-05    | 0           | 0           | 0           | 0           | 7.16E-05    |
| 3.31E-05    | 0           | 0           | 0           | 0           | 8.15E-05    | 0           | 0           | 0           | 0           | 2.79E-05    |
| 0.000267106 | 0           | 0           | 0           | 0           | 0.000940463 | 0           | 0           | 0           | 0           | 0.000155349 |
| 0           | 0           | 0           | 0           | 0           | 6.80E-05    | 0           | 0           | 0           | 0           | 5.24E-05    |
| 0           | 0           | 0           | 0           | 0           | 0           | 0           | 0           | 0           | 0           | 0           |
| 4.73E-05    | 0           | 0           | 0           | 0           | 0.000252783 | 0           | 0           | 0           | 0           | 6.11E-05    |
| 0.014549004 | 0.044486679 | 0.020629073 | 0.037296657 | 0.028103368 | 0.017607854 | 0.0009441   | 0.004005707 | 0.001843111 | 0.017720141 | 0.0024786   |
| 0.071544227 | 0.227842155 | 0.043554265 | 0.250415112 | 0.160670529 | 0.113347504 | 0.046955651 | 0.013910675 | 0.079820535 | 0.295395453 | 0.115307277 |
| 0.041044503 | 0.042537008 | 0.010436543 | 0.041291623 | 0.032241946 | 0.039124337 | 0.004515909 | 0.01886759  | 0.010855316 | 0.211424912 | 0.025093209 |
| 0.019420735 | 0.014372922 | 0.011800614 | 0.019742925 | 0.008054135 | 0.019738845 | 0.004362466 | 0.03397466  | 0.016375995 | 0.030601985 | 0.01123923  |
| 0.004167327 | 0.017055684 | 0.015620812 | 0.015203753 | 0.006876927 | 0.009738954 | 0.003669842 | 0.009225534 | 0.003543445 | 0.012660903 | 0.009624649 |

| H036        | H038        | H039        | H040        | H041        | H042        | H043        | H044        | H045        | H046        | H047        |
|-------------|-------------|-------------|-------------|-------------|-------------|-------------|-------------|-------------|-------------|-------------|
| 0           | 0.000183165 | 0.000312898 | 0.009176607 | 0.003668972 | 0.001581935 | 0.003708639 | 0.002468946 | 0.016058662 | 0.002349077 | 0.007060433 |
| 0           | 0           | 7.40E-05    | 0.000476808 | 0.000178394 | 0.000424309 | 0.000499455 | 0.000246454 | 0.000948042 | 0.000195123 | 0.000560708 |
| 0.000130507 | 0           | 0.000150478 | 0.000560185 | 0.000315163 | 0.000451982 | 0.000400682 | 0.00031687  | 0.001631663 | 0.000169782 | 0.006537853 |
| 0           | 0           | 0           | 0.000432515 | 0.000178394 | 0.000110689 | 0.000216182 | 0.000215648 | 0.000599781 | 7.86E-05    | 0.001718009 |
| 0           | 0           | 0           | 0           | 0           | 0           | 0.000150955 | 5.28E-05    | 0.000635252 | 0           | 0.000580893 |
| 0.000206473 | 7.68E-05    | 0.000186306 | 0.000698277 | 0.001444992 | 0.00017987  | 0.000383909 | 0.000440097 | 0.002363655 | 0.000780492 | 0.017911251 |
| 0           | 0.000254068 | 5.49E-05    | 0.000164147 | 0.000558968 | 0.000142974 | 0.000178909 | 5.50E-05    | 9.03E-05    | 0.000304088 | 0.005405224 |
| 0.000251274 | 0.000112263 | 0           | 0.000268368 | 0.002152622 | 0           | 0.000423046 | 5.94E-05    | 0.00100286  | 0.000438393 | 0.000980117 |
| 0           | 0           | 0           | 0.000101615 | 0           | 0           | 4.47E-05    | 3.96E-05    | 0.000316014 | 8.11E-05    | 0.00065715  |
| 0.000210369 | 0.001293974 | 0.001722132 | 0.00594838  | 0.000915756 | 0.003809559 | 0.005315095 | 0.012575779 | 0.083130988 | 0.005990528 | 0.001273928 |
| 0           | 0.000168394 | 0.003609074 | 0.000484625 | 0.00020218  | 0.004722746 | 0.001779774 | 0.000125428 | 0.048820914 | 0.000146976 | 0.003133235 |
| 0.000237639 | 7.98E-05    | 0.000886146 | 0.004158394 | 0           | 0.000396637 | 0.000339182 | 0.000809779 | 0.017209856 | 0.0002306   | 0.000921804 |
| 0.163963037 | 0.091257696 | 0.35194558  | 0.062446261 | 0.0570207   | 0.057078815 | 0.163176384 | 0.253467416 | 0.008964474 | 0.236967942 | 0.186282843 |
| 0.046320103 | 0.013885114 | 0.056538968 | 0.08665145  | 0.020438017 | 0.049574999 | 0.089145243 | 0.127474172 | 0.024291145 | 0.130103922 | 0.077570565 |
| 0.026759696 | 0.009820025 | 0.021582785 | 0.019015013 | 0.005060446 | 0.001863271 | 0.099726977 | 0.006979943 | 0           | 0.035884883 | 0.050223722 |
| 0.003566531 | 0.005234983 | 8.36E-05    | 0.001472113 | 0.000749255 | 0.000267499 | 0.017400785 | 0.000151834 | 0.002898943 | 0.002909106 | 0           |
| 0.013822012 | 0           | 0.000401274 | 0.006248013 | 0.000547075 | 0.003011673 | 0.000728682 | 0.000268459 | 0.000180579 | 0.044181409 | 0.038188689 |
| 0.00036425  | 8.27E-05    | 0.000198248 | 0.002868667 | 0           | 0.00112073  | 0.001257955 | 0.000374083 | 0.000196702 | 0.001218885 | 0.001987149 |
| 0           | 0.000363376 | 0           | 0.005445516 | 0.003811687 | 0.029023674 | 0.000784591 | 0           | 0.000325688 | 0.006266741 | 0.012366972 |
| 0.075652923 | 0.142260378 | 0.165845409 | 0.127005591 | 0.178637902 | 0.10659847  | 0.116518352 | 0.016210983 | 0.005701148 | 0.060133342 | 0.069767755 |
| 0.003083462 | 0.047481181 | 0.015905242 | 0.128592347 | 0.004293351 | 0.178837116 | 0.005961777 | 0.000470904 | 0.000599781 | 0.003720006 | 0.001161787 |
| 0.01013861  | 0.025510204 | 0.008796968 | 0.055890798 | 0.031105984 | 0.013697809 | 0.005223776 | 0.001524937 | 0.001576845 | 0.003296817 | 0.0074933   |
| 0.000338928 | 0           | 0           | 0.004291275 | 0           | 0           | 0.000178909 | 0           | 9.35E-05    | 0.000727276 | 0.001139358 |
| 0.000373989 | 6.50E-05    | 0.000437102 | 0.044202479 | 0.000166501 | 0.000322844 | 0           | 0.001544741 | 0.000519166 | 0.002012047 | 0.069337131 |
| 0.004762517 | 0.00610945  | 0           | 0.005700856 | 0           | 0.000115301 | 0.004362776 | 0.001529338 | 0.005427054 | 0.001056705 | 0.021304655 |
| 0.001172612 | 0.003813975 | 0.000492038 | 0.001070865 | 0           | 0.000724093 | 0.006494777 | 0.000941808 | 0.000109637 | 0.001857469 | 0.004774988 |
| 0.001455051 | 0.001350106 | 0.000919585 | 0.003269915 | 0.000142715 | 0.003435982 | 0.016416784 | 0.012373335 | 0.014665622 | 0.003813767 | 0.00346966  |
| 0.019427953 | 0.017317987 | 0.039611433 | 0.039908599 | 0.011054488 | 0.02762622  | 0.019059422 | 0.022372344 | 0.108595899 | 0.023769522 | 0.046843776 |
| 0.001121967 | 0.022570696 | 0.003167195 | 0.015648694 | 0.001676905 | 0.001102282 | 0.012976509 | 0.002521757 | 0.010370413 | 0.011565469 | 0.015477779 |
| 0.005323501 | 0.001468277 | 0           | 0.00268107  | 0.000148662 | 0.015574916 | 0.004838003 | 0.006986544 | 0.038034523 | 0.010161597 | 0           |
| 0.002074471 | 0.00227775  | 0.000291401 | 0.011357419 | 0.000594647 | 0.003975593 | 0.004442912 | 0.002336916 | 0.010854108 | 0.001330384 | 0.012564341 |
| 0.037301513 | 0.011512827 | 0.041567642 | 0.007837374 | 0.015181338 | 0.002767234 | 0.030740703 | 0.079349536 | 0.000367608 | 0.027859501 | 0.011804021 |
| 0.00949192  | 0.002416601 | 0.010375788 | 0.001190718 | 0.002652126 | 0.000207543 | 0.005993459 | 0.017718316 | 0.000128985 | 0.001038966 | 0.001143844 |
| 0           | 0           | 5.97E-05    | 0.0032152   | 0           | 0           | 0           | 0           | 0.001370468 | 0.000192589 | 0           |
| 0.001131706 | 0.003503776 | 0.000255573 | 0.004458028 | 0.000856292 | 0.000115301 | 0.001054819 | 0.001148654 | 0.005991364 | 0.013308905 | 0.038074305 |
| 0.000239587 | 0.000416553 | 0           | 0.000442937 | 0           | 0           | 0.000316818 | 0           | 0.001257606 | 0.001591392 | 0.003146692 |
| 0           | 9.45E-05    | 0           | 0           | 0           | 0           | 0           | 5.50E-05    | 0           | 0.00079823  | 0           |
| 0           | 8.57E-05    | 0.000527866 | 0           | 0           | 0           | 0           | 3.96E-05    | 0.000196702 | 0.000615778 | 0           |
| 0           | 0           | 0           | 0.000937984 | 0.000214073 | 0.000142974 | 0.000149091 | 0.000250855 | 0.001954126 | 0.000164714 | 0.000556222 |
| 0           | 0           | 0           | 0           | 0           | 0           | 0           | 0           | 0           | 0           | 0           |
| 0.011402771 | 0.004050317 | 0.013065276 | 0.012329274 | 0.001873138 | 0.001402065 | 0.014968737 | 0.014727855 | 0.035341956 | 0.018306079 | 0.034221121 |
| 0.050548907 | 0.053729483 | 0.091877315 | 0.121773727 | 0.047440937 | 0.075836051 | 0.059002768 | 0.07823389  | 0.252340276 | 0.109960646 | 0.141235576 |
| 0.009184158 | 0.004466871 | 0.009809706 | 0.01289467  | 0.008164503 | 0.024379332 | 0.010156825 | 0.017881152 | 0.153276386 | 0.011208166 | 0.020071098 |
| 0.002074471 | 0.001169895 | 0.005586779 | 0.000205835 | 0.001867192 | 0           | 0.000458455 | 0.000737163 | 0           | 0           | 0           |
| 0.000564879 | 0.000995592 | 0.003198246 | 0.000367377 | 0.001373635 | 0.000110689 | 8.01E-05    | 0           | 0.000283768 | 0.000326894 | 6.73E-05    |
| 0.000120767 | 0.000404736 | 0.000847929 | 0           | 0.000321109 | 0.000193706 | 0           | 0           | 0           | 0           | 0           |
| 0.000338928 | 0.000460868 | 0.000183917 | 0           | 0           | 0.000719481 | 0           | 0           | 0           | 0           | 0           |
| 9.54E-05    | 0.000549496 | 4.78E-05    | 0           | 0           | 0.000507326 | 0           | 0           | 0           | 0           | 0           |
| 0.000557088 | 0.000499273 | 0.000563694 | 0           | 0.000279484 | 0.001180687 | 0           | 0           | 0           | 0           | 0           |
| 0.001094697 | 0.001033998 | 0.001127388 | 0           | 0.000368681 | 0.002093874 | 0           | 0           | 0           | 0           | 0           |
| 0.000116872 | 0.000673576 | 0.000112261 | 0           | 0.000362735 | 0.000327456 | 0           | 0           | 0           | 0           | 0           |
| 0           | 0.000159531 | 0.000133758 | 0           | 0.000570861 | 0.000903963 | 0           | 0           | 0           | 0           | 0           |
| 0.000925233 | 0.00092469  | 0.00053742  | 0           | 0.000564915 | 0.002338313 | 4.66E-05    | 0           | 0.000128985 | 0.000101363 | 0           |
| 0.007403815 | 0.022742044 | 0.015217345 | 0.011993163 | 0.027240779 | 0.067612753 | 0.002050001 | 0.008452068 | 0.023004518 | 0.001142863 | 0.006019759 |
| 0.430644508 | 0.345130756 | 0.068725264 | 0.080934961 | 0.159085909 | 0.189288037 | 0.24450553  | 0.270659816 | 0.102220803 | 0.182949296 | 0.05017438  |
| 0.008373849 | 0.077827541 | 0.022726893 | 0.066458747 | 0.254205641 | 0.036269215 | 0.004977776 | 0.009391676 | 0.000303115 | 0.017312726 | 0.001421955 |
| 0.038285182 | 0.060999965 | 0.035393284 | 0.015781575 | 0.096320919 | 0.078095958 | 0.023142652 | 0.021954252 | 0.014407651 | 0.017487577 | 0.019458805 |
| 0.009345831 | 0.013114047 | 0.004846334 | 0.012941569 | 0.05599196  | 0.009736052 | 0.020220468 | 0.004464787 | 0.001212461 | 0.003892323 | 0.005909861 |

| H048        | H049        | H050        | H051        | H052        | H053        | H054        | H055        | H056        | H057        | H058        |
|-------------|-------------|-------------|-------------|-------------|-------------|-------------|-------------|-------------|-------------|-------------|
| 0.002741489 | 0.007647863 | 0.001861602 | 0.002803264 | 0.006199449 | 0.035768162 | 0.028910785 | 0.033708286 | 0.002422187 | 0.001788534 | 0.023900965 |
| 0.000159515 | 0.000846147 | 0           | 0.001420764 | 0.004344496 | 0.052124457 | 0.020128429 | 0.047694082 | 0.000612472 | 0.00047765  | 0.014957153 |
| 0           | 0.001154064 | 0.00034014  | 0.001627058 | 0.007539972 | 0.189396225 | 0.069419148 | 0.126159412 | 0.000550917 | 0.000634213 | 0.130693298 |
| 5.14E-05    | 0.000398039 | 0.000295331 | 0.000998195 | 0.004949045 | 0.122969639 | 0.039891772 | 0.085688237 | 0.000741737 | 0.000812005 | 0.084929198 |
| 0           | 0.000255346 | 0           | 0.000332732 | 0.00108894  | 0.030908776 | 0.009538896 | 0.027157713 | 0           | 0           | 0.022130926 |
| 0.00041636  | 0.002090332 | 0.000313662 | 0.001941489 | 0.00992062  | 0.28556542  | 0.095595841 | 0.182287851 | 0.001449619 | 0.000904881 | 0.191288275 |
| 0           | 0.000415563 | 3.67E-05    | 0.000785247 | 0.004032833 | 0.103940789 | 0.033036261 | 0.069949794 | 0.00019082  | 0.000313126 | 0.066166353 |
| 0           | 0.000468134 | 0           | 0.000858448 | 0.003030258 | 0.08551107  | 0.034557454 | 0.060978402 | 0.00046474  | 0.000496225 | 0.046719877 |
| 0           | 0.000150204 | 0           | 0.000231248 | 0.001768589 | 0.043347178 | 0.013739418 | 0.024326833 | 0.000273919 | 0.000132681 | 0.030260477 |
| 0.014399576 | 0.003301974 | 0.067148022 | 0.005014266 | 0.010757977 | 0.000269609 | 0.006307881 | 0.002637298 | 0.011910881 | 0.002722605 | 0.020369596 |
| 0.000908422 | 0.000122666 | 0.014909109 | 0.004654916 | 0.000446841 | 0           | 0.001602324 | 0.001344668 | 0.016444402 | 0.00184426  | 0.004384819 |
| 0.002062876 | 0.001053928 | 0.000892102 | 0.000146402 | 0.009312316 | 0           | 0.000740314 | 0           | 0.001726616 | 0.002390903 | 0.001815759 |
| 0.073649803 | 0.134342033 | 0.020019349 | 0.101296822 | 0.011741779 | 0.001814513 | 0.118971511 | 0.005913625 | 0.013588253 | 0.152601202 | 0.062637162 |
| 0.203943526 | 0.141444157 | 0.0615734   | 0.131254315 | 0.362587021 | 0.008569723 | 0.027852035 | 0.045874825 | 0.002711495 | 0.073544826 | 0.035762183 |
| 0.067966756 | 0.030914389 | 0.00743215  | 0.020418077 | 0.010754222 | 0           | 0.012820617 | 0           | 0.000153887 | 0.024731654 | 0.009755896 |
| 0.001795216 | 0.015077931 | 0.001297418 | 0.042749362 | 0.079319901 | 0           | 0.015873145 | 0.076046593 | 0.004345779 | 0           | 0.000248197 |
| 0.001892547 | 0.02129886  | 0.000140537 | 0.00841312  | 0.089863845 | 0.003430029 | 0.006754098 | 0           | 0           | 0.035168305 | 0.006786237 |
| 0.001795216 | 0.014106614 | 0.000122206 | 0.007403279 | 0.01325503  | 0           | 0           | 0           | 0.001424997 | 0.026313206 | 0           |
| 0.001803327 | 0           | 0.000945058 | 0.006864254 | 0.001197834 | 0           | 0           | 0           | 0           | 0.000493572 | 0           |
| 0.011847342 | 0.035275298 | 0.118010082 | 0.177306038 | 0.097445121 | 0.000969309 | 0.035995489 | 0           | 0.215377655 | 0.04623917  | 0.029404849 |
| 0.021069451 | 0.000698446 | 0.031001578 | 0.0055666   | 0.000315417 | 0           | 0.002523153 | 0           | 0.006195505 | 0.000193714 | 0.004439248 |
| 0.003230847 | 0.001256703 | 0.035093437 | 0.024036534 | 7.89E-05    | 0.000239653 | 0.006701363 | 0.000589073 | 0.006081628 | 0.000806698 | 0.00209226  |
| 0.000497469 | 0.000210285 | 0.000150721 | 0.002352413 | 0           | 0.001900103 | 0.000158204 | 0           | 0.000280075 | 0           | 0           |
| 0.000110849 | 5.51E-05    | 0.000757676 | 0.0075763   | 0.018496962 | 0           | 0           | 0.02113793  | 0.004074937 | 0.006074115 | 0           |
| 0.138899403 | 0.000205278 | 0.045370946 | 0.05286274  | 0.00551229  | 0.000246072 | 0.005178142 | 0.006159245 | 0.008540748 | 0.013376853 | 0           |
| 0.038061816 | 6.76E-05    | 0.026435155 | 0.007163712 | 0.008260925 | 0           | 0.005662895 | 0           | 0.00258223  | 0.005694649 | 0           |
| 0.002230501 | 0.032579145 | 0.008584959 | 0.006656297 | 0.020100333 | 0           | 0.019956027 | 0           | 0.012055535 | 0.006978997 | 0.00408437  |
| 0.039957066 | 0.110522258 | 0.071115637 | 0.029395177 | 0.001577086 | 0           | 0.04889318  | 0.010118314 | 0.053306577 | 0.01905558  | 0.02054377  |
| 0.072384501 | 0.014920217 | 0.015575131 | 0.020581116 | 0.000428066 | 0.000213976 | 0.020166966 | 0           | 0.022295199 | 0.001637278 | 0.005011844 |
| 0.017278951 | 0.156239204 | 0.048745863 | 0.031318366 | 0.00110396  | 0.00096289  | 0.055472848 | 0.000154033 | 0.07757769  | 0.004359883 | 0           |
| 0.017341134 | 0.001935122 | 0.009978105 | 0.009349759 | 0.000270358 | 0           | 0.001196672 | 0.002656031 | 0.002936171 | 7.16E-05    | 0           |
| 0.00292804  | 0.022815916 | 0.005487041 | 0.007591272 | 0.029833204 | 0.002394387 | 0.019951971 | 0           | 0.00028623  | 0.028494474 | 0.029520239 |
| 0.000405546 | 0.005487435 | 0.001387036 | 0.00230583  | 0.002996463 | 0.001208962 | 0.004460139 | 0           | 0           | 0.005662806 | 0.003270108 |
| 0.000846239 | 9.26E-05    | 0           | 0.000217939 | 0.000717198 | 0           | 0.001953212 | 0           | 7.69E-05    | 0.000342316 | 0           |
| 0.002116949 | 0.002027748 | 0.000985794 | 0.006549822 | 0.032807137 | 0           | 0.005914399 | 0           | 9.85E-05    | 0.001639932 | 0           |
| 0.000270364 | 7.01E-05    | 0           | 0.005065839 | 0.006368422 | 0           | 0.000281928 | 0           | 0           | 6.10E-05    | 0           |
| 0.016667928 | 0           | 0           | 0.000103147 | 0           | 0.00026533  | 0           | 0           | 0           | 0           | 0           |
| 6.76E-05    | 0.00156462  | 0           | 0           | 0           | 0           | 0           | 0           | 0           | 0.000145949 | 0           |
| 0.000532617 | 0.00041306  | 0.000378838 | 0.000176348 | 0.000116404 | 0           | 0.001176389 | 0.000158196 | 0.000603238 | 0.000199021 | 0           |
| 0           | 0           | 0           | 0           | 0           | 0           | 0           | 0           | 0           | 0           | 0           |
| 0.023756867 | 0.020710563 | 0.041024492 | 0.012717003 | 0.01598489  | 0.000740356 | 0.01470284  | 0.033212882 | 0.016918375 | 0.007419496 | 0           |
| 0.102294848 | 0.065063161 | 0.163554152 | 0.136980627 | 0.066515467 | 0.012693033 | 0.104033393 | 0.108073003 | 0.124778018 | 0.074611578 | 0.059739349 |
| 0.012926093 | 0.009775746 | 0.020656856 | 0.014194332 | 0.014013533 | 0.006066208 | 0.01045364  | 0.009443899 | 0.054768507 | 0.00946543  | 0.009248615 |
| 0           | 0.000285387 | 5.09E-05    | 2.83E-05    | 7.51E-05    | 0           | 0.000162261 | 0           | 0           | 0.000488264 | 0           |
| 0           | 0.000112653 | 8.96E-05    | 0           | 7.51E-05    | 0           | 0           | 0           | 8.31E-05    | 0           | 0           |
| 0           | 0           | 0           | 0           | 0           | 0           | 0           | 0           | 0           | 0           | 0           |
| 0.000638059 | 0           | 0           | 0           | 0           | 0           | 0           | 0           | 0           | 0           | 0           |
| 0.001365337 | 0           | 0           | 0           | 0           | 0           | 0           | 0           | 0           | 0           | 0           |
| 6.49E-05    | 0           | 0           | 0           | 0           | 0           | 0           | 0           | 0           | 0           | 0           |
| 0.000538024 | 0           | 0           | 0           | 0           | 0           | 0           | 0           | 0           | 0           | 0           |
| 0.00020818  | 0           | 0           | 0           | 0           | 0           | 0           | 0           | 0           | 0           | 0           |
| 7.57E-05    | 0           | 0           | 0           | 0           | 0           | 0           | 0           | 0           | 0           | 0           |
| 0           | 0           | 3.46E-05    | 0           | 0           | 0           | 0           | 0           | 0           | 0           | 0           |
| 0.002695527 | 0.011400448 | 0.004236468 | 0.002633571 | 0.013604242 | 0           | 0.004145759 | 0.004046493 | 0.018694235 | 0.079828577 | 0.00959914  |
| 0.069488904 | 0.067506471 | 0.135450889 | 0.069963483 | 0.009199667 | 0.007495565 | 0.075035393 | 0.012632802 | 0.275018236 | 0.29767411  | 0.050246891 |
| 0.004863845 | 0.037015156 | 0.020882937 | 0.012557292 | 0.012383878 | 0.000736076 | 0.002987624 | 0           | 0.003154691 | 0.021051095 | 0.009446738 |
| 0.01304235  | 0.021131133 | 0.00813076  | 0.009642563 | 0.001077675 | 0.000252491 | 0.011171643 | 0           | 0.016031984 | 0.027759424 | 0.006496673 |
| 0.007710776 | 0.005474919 | 0.009503539 | 0.005894341 | 0.008531283 | 0           | 0.005924541 | 0.00185048  | 0.019171286 | 0.015298067 | 0.004049535 |

| H059        | H060        | H061        | H062        | H063        | H064        | H065        | H066        | H067        | H068        | H069        |
|-------------|-------------|-------------|-------------|-------------|-------------|-------------|-------------|-------------|-------------|-------------|
| 0.04225528  | 0.023684053 | 0.000467292 | 0.096357113 | 0.008797024 | 0.001509296 | 0.013313086 | 0.079554786 | 0.00118911  | 0.010537145 | 0.000791205 |
| 0.042911333 | 0.016391058 | 0           | 0.012490168 | 0.000754031 | 0.000258948 | 0.001260328 | 0.011700472 | 0           | 0.001680247 | 0.000123399 |
| 0.140163854 | 0.022725912 | 0           | 0.014920649 | 0.000687888 | 0.000120842 | 0.00220828  | 0.013153313 | 7.84E-05    | 0.002694804 | 0           |
| 0.091180056 | 0.014641595 | 0           | 0.008630687 | 0.000271186 | 0.000125775 | 0.001359299 | 0.008645781 | 0.000218829 | 0.001477336 | 0.000112511 |
| 0.020230958 | 0.004003661 | 0           | 0.002359621 | 0.000152129 | 0           | 0.000143817 | 0.00228373  | 0           | 0.000427182 | 0           |
| 0.194477802 | 0.031548082 | 0           | 0.018997433 | 0.001564283 | 7.40E-05    | 0.002293333 | 0.019063476 | 0.000249796 | 0.003186062 | 0.00029398  |
| 0.073993276 | 0.011384343 | 8.54E-05    | 0.007317425 | 0.000582059 | 3.95E-05    | 0.000969602 | 0.006251913 | 0.00016309  | 0.000662131 | 0           |
| 0.06311732  | 0.009440257 | 0           | 0.004990871 | 9.59E-05    | 0           | 0.001116512 | 0.005080894 | 0           | 0.001139151 | 0           |
| 0.033143176 | 0.00508157  | 0           | 0.003063492 | 7.28E-05    | 0.000125775 | 0.000230416 | 0.002304786 | 0.000138317 | 0.000897081 | 0           |
| 0.003255296 | 0.003449736 | 0.011923485 | 0.003472116 | 0.038693675 | 0.001726319 | 0.012867718 | 0.0184642   | 0.00680435  | 0.001413259 | 0.00117229  |
| 0           | 0.004598222 | 0.000226109 | 0.000177149 | 0           | 5.67E-05    | 0.000425264 | 0.029001751 | 0.002539245 | 0.001021676 | 0.001125108 |
| 0           | 0.000637335 | 0           | 0.004929459 | 0.014468789 | 0.000342798 | 0.001784563 | 0.001355661 | 0.000712227 | 0.000348865 | 0.058988346 |
| 0.061455621 | 0.05297366  | 0.367213683 | 0.10559483  | 0.105779248 | 0.249093066 | 0.078268696 | 0.021886555 | 0.199477287 | 0.192167626 | 0.108271725 |
| 0.06425009  | 0.089990419 | 0.0060346   | 0.117192169 | 0.229995866 | 0.176508741 | 0.184010998 | 0.093509834 | 0.134392109 | 0.058961735 | 0.150543137 |
| 0.012326537 | 0.00089398  | 0.016646652 | 0.024337877 | 0.016238115 | 0.09811412  | 0.022903951 | 0.008823944 | 0.077339615 | 0.033159969 | 0.028087787 |
| 0.000933003 | 0.005010993 | 0.010174908 | 0.020317781 | 0.040668045 | 0.002522892 | 0.138073198 | 0           | 0.011096293 | 0.034409475 | 0           |
| 0.009604711 | 0.001231896 | 0.005610017 | 0.00563333  | 0.019541959 | 0           | 0.008633634 | 0.000239711 | 0           | 0.007899299 | 0.010231228 |
| 0.00056298  | 0.00127467  | 0.005924058 | 0.001310901 | 0.001551054 | 0.000273745 | 0.002409314 | 0.000877859 | 0.001003311 | 0.007568233 | 0.000391973 |
| 0           | 0.000881148 | 0.000120592 | 0.014467148 | 0.011217859 | 0.000157835 | 0.008315073 | 0           | 0.000408756 | 0.001135591 | 0.008536307 |
| 0.011087073 | 0.296172568 | 0.06768198  | 0.040217491 | 0.008426623 | 0.071186006 | 0.112056314 | 0.041429453 | 0.088906597 | 0.178558333 | 0.146630663 |
| 0           | 0.029223307 | 0.001180792 | 0.001492774 | 0.000277801 | 0.000162767 | 0.001541776 | 0.010584521 | 0.005712268 | 0.000996757 | 0.020738289 |
| 0.000771827 | 0.048993524 | 0.012830433 | 0.005801031 | 0.000585366 | 0.000586949 | 0.004167588 | 0.009002107 | 0.010262265 | 0.027364539 | 0.020545932 |
| 0           | 0.002356856 | 0.001889267 | 0.000684975 | 6.95E-05    | 0.000389655 | 0.000725269 | 0.001185596 | 0           | 0.012299269 | 0.000682324 |
| 0           | 0.005554225 | 0.000261282 | 0.019831213 | 0.008300951 | 0.019130083 | 0.008155792 | 0.004711161 | 0.009093799 | 0.023509225 | 0.031376008 |
| 0.001638998 | 0.000667277 | 0.000115567 | 0.000741663 | 0.000347251 | 0.002352726 | 0.034042777 | 0.00199057  | 0.000134188 | 0.014915756 | 0.003712858 |
| 0.003361989 | 0.000536816 | 0           | 0.00022675  | 0.000148822 | 5.67E-05    | 0.056577134 | 0.001431785 | 0.000132123 | 0.022818615 | 0.001549746 |
| 0           | 0.011234633 | 0.004245826 | 0.00547744  | 0.009187267 | 0.010180351 | 0.003315513 | 0.005615384 | 0.004244461 | 0.010850412 | 0.003182968 |
| 0.005405062 | 0.017479661 | 0.049553058 | 0.043566784 | 0.010119884 | 0.028395485 | 0.009128487 | 0.049543983 | 0.031616694 | 0.028994949 | 0.020313651 |
| 0.000195227 | 0.00404002  | 0.109534768 | 0.013106646 | 0.009031831 | 0.024829403 | 0.002735608 | 0.013331476 | 0.019692566 | 0.035342155 | 0.01239434  |
| 0           | 0.030562138 | 0.0111723   | 0.011887862 | 0.054511782 | 0.006907743 | 0.002434057 | 0.059998931 | 0.00016309  | 8.19E-05    | 0.001331983 |
| 0           | 0           | 0.007883669 | 0.006667879 | 0.000833402 | 0.000929746 | 0.001298988 | 0           | 0.003594167 | 0.004371491 | 0           |
| 0.002435796 | 0.004681632 | 0.014357926 | 0.013366464 | 0.055530384 | 0.049298744 | 0.008963021 | 0.001491713 | 0.069600079 | 0.020461997 | 0.004409699 |
| 0.000170256 | 0.001700273 | 0.004416664 | 0.003552423 | 0.003601488 | 0.006927472 | 0.002112403 | 0.000654345 | 0.001507031 | 0.00463492  | 0.001600557 |
| 0           | 0           | 0.000231134 | 0.001025101 | 0.003399752 | 0.000406918 | 0.000255158 | 0           | 0           | 0.009056249 | 0.013577518 |
| 0           | 0.0005967   | 0.004549817 | 0.001865967 | 0.02898057  | 0.000293474 | 0.002976849 | 0.000236471 | 0.000495462 | 0.009451392 | 0.042768638 |
| 0           | 0           | 0.001582763 | 3.78E-05    | 0.002050434 | 0           | 0.000290726 | 0           | 0.000158961 | 0.001292224 | 0.003988691 |
| 0           | 0           | 0           | 0           | 0.014941711 | 0           | 0           | 0           | 0           | 0           | 0           |
| 0           | 0           | 0.000610494 | 5.67E-05    | 5.62E-05    | 0.001783041 | 0           | 0           | 0           | 0.000113915 | 0.002493385 |
| 0           | 0.001088602 | 0           | 0.004100403 | 0.000463001 | 0.0001677   | 0.000569081 | 0.006483526 | 0.000218829 | 0.000822325 | 0.000127028 |
| 0           | 0           | 0           | 0           | 0           | 0           | 0           | 0           | 0           | 0           | 0           |
| 0.012292486 | 0.002506566 | 0.01628739  | 0.01677953  | 0.018863993 | 0.00410864  | 0.015976012 | 0.009419981 | 0.005357187 | 0.020963935 | 0.00387618  |
| 0.060638392 | 0.077427648 | 0.108597672 | 0.135301495 | 0.188623398 | 0.096612222 | 0.135606666 | 0.384680545 | 0.047721286 | 0.119749672 | 0.061467214 |
| 0.006862454 | 0.013608599 | 0.016081379 | 0.030835693 | 0.055282348 | 0.01172664  | 0.034376803 | 0.041337132 | 0.003612747 | 0.010683099 | 0.009777555 |
| 0           | 0.000209593 | 0.00068084  | 0.000134633 | 0           | 0.000742317 | 0           | 0           | 0           | 0           | 0.000217763 |
| 0           | 0.000220287 | 0.000761234 | 0.000108651 | 0.000132286 | 0.000106045 | 0.000210312 | 5.99E-05    | 0.000127994 | 0           | 0.000384714 |
| 0           | 0           | 0.000344188 | 0           | 0           | 0           | 0           | 0           | 0           | 0           | 0.000272204 |
| 0           | 0           | 0           | 0           | 0           | 0           | 0           | 0           | 9.08E-05    | 0           | 0.000134287 |
| 0           | 0           | 0           | 0           | 0           | 0.000128241 | 0           | 0           | 7.84E-05    | 0           | 0.00017784  |
| 0           | 0           | 0.000223597 | 0           | 0           | 0.000170166 | 0           | 0           | 0.000142445 | 0           | 0.00011977  |
| 0           | 0           | 0.001728478 | 0           | 0           | 0.000984002 | 0           | 0           | 7.02E-05    | 0           | 0.000112511 |
| 0           | 0           | 0           | 0           | 0           | 0.0001677   | 0           | 0           | 7.23E-05    | 0           | 0           |
| 0           | 0           | 0           | 0           | 0           | 0           | 0           | 0           | 0           | 0           | 0           |
| 0           | 0           | 0.00017335  | 0           | 0           | 5.18E-05    | 0           | 0           | 0.000245667 | 0           | 0           |
| 0.00281036  | 0.02079252  | 0.004474447 | 0.007246565 | 0.010116577 | 0.007487293 | 0.003477887 | 0.004486477 | 0.005916647 | 0.003851754 | 0.035183229 |
| 0.016664661 | 0.105759113 | 0.095392902 | 0.107947366 | 0.007685821 | 0.079479737 | 0.066364394 | 0.023047856 | 0.200265898 | 0.045142412 | 0.119239717 |
| 0.000186147 | 0.007059875 | 0.00088685  | 0.041622872 | 0.009901612 | 0.002540155 | 0.004789247 | 0.002928357 | 0.022242132 | 0.014096992 | 0.027568786 |
| 0.012798714 | 0.012265491 | 0.031358815 | 0.013442048 | 0.006435717 | 0.037433999 | 0.003884594 | 0.002904062 | 0.028051429 | 0.011754613 | 0.036224862 |
| 0.008819263 | 0.005419486 | 0.006484306 | 0.006313582 | 0.000962381 | 0.003225751 | 0.003380463 | 0.001245524 | 0.004661475 | 0.007034256 | 0.005150093 |



| H070        | H071        | H072        | H073        | H074        | H075        | H076        | H077        | H078        | H079        | H080        |
|-------------|-------------|-------------|-------------|-------------|-------------|-------------|-------------|-------------|-------------|-------------|
| 0.002241009 | 0.001287155 | 0.000406337 | 0.002211899 | 0.000179503 | 0.083289409 | 0.001112028 | 0.000470166 | 0.000296125 | 0.00042225  | 0.002358107 |
| 0.000198736 | 8.61E-05    | 0           | 9.12E-05    | 0           | 0.00478522  | 8.68E-05    | 0           | 0           | 0           | 0.000336081 |
| 0.000183046 | 0.002075157 | 0.000204131 | 0.000106817 | 0           | 0.000977954 | 8.35E-05    | 0.000101964 | 9.28E-05    | 0.000214098 | 0           |
| 7.84E-05    | 0.001152865 | 6.16E-05    | 8.60E-05    | 0.000122587 | 0.00067738  | 0           | 0.00012179  | 0           | 0.000318174 | 0           |
| 0.000104598 | 0           | 0           | 0           | 0           | 0.000130684 | 0           | 0           | 0           | 0           | 6.28E-05    |
| 0           | 0.000435808 | 7.32E-05    | 6.25E-05    | 0           | 0.001707607 | 7.01E-05    | 0           | 7.73E-05    | 0           | 0           |
| 0           | 0           | 0           | 0           | 0           | 0.00036156  | 8.68E-05    | 0           | 0           | 0           | 6.65E-05    |
| 0           | 0.001043913 | 0           | 0           | 0           | 0.000531449 | 0           | 0.000130287 | 0           | 0           | 7.76E-05    |
| 0           | 0.00028885  | 0           | 0           | 0           | 0.000182958 | 0           | 0           | 0           | 0           | 0           |
| 0.006762252 | 0.001127527 | 0.000246498 | 0.009376474 | 8.10E-05    | 0.015573203 | 0.000537647 | 0.003877451 | 0.000377891 | 0.003104426 | 0.00711864  |
| 0.001864457 | 0.007613975 | 0.000462184 | 0.010384725 | 0.000221095 | 0.006597375 | 0.005727109 | 0.001515293 | 0.000682856 | 0.012741827 | 0.018292413 |
| 0.001082588 | 0.000354728 | 0.000215686 | 0.001959185 | 0           | 0.000973597 | 0.000945056 | 0.000855362 | 0           | 0.000205178 | 0.000858669 |
| 0.043606848 | 0.069242834 | 0.351835447 | 0.033053437 | 0.303937235 | 0.066951703 | 0.185247768 | 0.195594604 | 0.172455476 | 0.127870256 | 0.041181011 |
| 0.372833844 | 0.027645951 | 0.038074311 | 0.080175493 | 0.133429506 | 0.1748838   | 0.048755564 | 0.076481234 | 0.062586324 | 0.023815471 | 0.100637815 |
| 0.01101154  | 0.005285442 | 0.012939219 | 0.011510214 | 0.021752645 | 0.042846999 | 0.027122787 | 0.00581476  | 0.016899037 | 0.00788001  | 0.001837366 |
| 0.000209196 | 0.007733062 | 0.051720286 | 0.003300915 | 0.004822489 | 0.014303388 | 0.015468204 | 0.013663129 | 0.01177209  | 0.000719608 | 0.007428869 |
| 0.000290259 | 0.061106902 | 0.013020101 | 7.56E-05    | 0.016304086 | 0.021090255 | 0.0121388   | 0.005140667 | 0.066177397 | 0.047842067 | 0           |
| 0.000240575 | 0.006253341 | 0.012970031 | 6.51E-05    | 0.002197812 | 0.000572832 | 0.066831857 | 0.008610264 | 0.030660028 | 0           | 0.001248301 |
| 0           | 0.00674996  | 0.012529031 | 0.004642644 | 0.007939705 | 0.003223544 | 0.007129666 | 0.000977152 | 0.011995289 | 0.010220224 | 0           |
| 0.020587474 | 0.232668388 | 0.07663199  | 0.031146358 | 0.115354474 | 0.044258389 | 0.114425302 | 0.153296683 | 0.114549702 | 0.15925351  | 0.123592891 |
| 0.019962502 | 0.029781919 | 0.008966365 | 0.137416533 | 0.000553831 | 0.000500956 | 0.091647103 | 0.001588934 | 0.053147879 | 0.006711389 | 0.002463363 |
| 0.000428851 | 0.0335547   | 0.009191679 | 0.033686525 | 0.002661892 | 0.00384865  | 0.024868677 | 0.020191635 | 0.029669997 | 0.036170732 | 0.000928839 |
| 0.000279799 | 0.003795586 | 0.01105582  | 0.000153713 | 0.003587862 | 0.000322354 | 0.003215864 | 0.003526243 | 0           | 0.000107049 | 0.000546593 |
| 9.68E-05    | 0.042263264 | 0.004512069 | 0.003037779 | 0.00044     | 0.155947657 | 0.00329601  | 0.005355924 | 0.001652998 | 0.000240861 | 0.097426579 |
| 0.002766613 | 0.002381743 | 0.015483155 | 0.002321322 | 0.003611942 | 0.012062153 | 0.000140256 | 0.003741499 | 0.006607574 | 0.001106175 | 0.039602169 |
| 0.00466768  | 0.002967043 | 0.009977392 | 0.001216675 | 0.001317811 | 0.011138652 | 0.00051761  | 0.001931645 | 0.000954673 | 0.00221235  | 0.001100573 |
| 0.002975809 | 0.003207751 | 0.016906296 | 0.002800697 | 0.019049162 | 0.001589991 | 0.006077748 | 0.012853085 | 0.006212004 | 0.000642295 | 0.001682252 |
| 0.016761807 | 0.026201703 | 0.031942674 | 0.017491982 | 0.022299909 | 0.013338503 | 0.024888714 | 0.030801519 | 0.013084765 | 0.035828769 | 0.009423196 |
| 0.000622357 | 0.070585731 | 0.039245177 | 0.033269677 | 0.01770946  | 0.007052592 | 0.013314276 | 0.0564737   | 0.031581553 | 0.005495192 | 0.008462965 |
| 0           | 0.006879182 | 0.002091381 | 0.007677818 | 0.002342289 | 0.007756108 | 0           | 0.006163136 | 0.004521437 | 0.003125242 | 0.00830231  |
| 0           | 0.002156237 | 0.001436621 | 0.007190627 | 0.002510847 | 0.005355875 | 0.001035221 | 0.010335149 | 0.003876149 | 0.002126116 | 0.002452284 |
| 0.006874694 | 0.001760969 | 0.034286331 | 0.001839342 | 0.057725396 | 0.00488759  | 0.017324922 | 0.025791139 | 0.015352113 | 0.027232124 | 0.004542634 |
| 0.000826323 | 0.000466213 | 0.016045479 | 0.00104733  | 0.000704876 | 0.000169889 | 0.003977252 | 0.00348659  | 0.001794432 | 0.007680779 | 0.00144958  |
| 0.00047592  | 0.001403708 | 0.001034136 | 0           | 0.031896729 | 0.000272259 | 0.000150274 | 0.000118958 | 0.000501645 | 0           | 0.000160654 |
| 0.004521243 | 0.001576004 | 0.012413485 | 0.000385584 | 0.026717424 | 0.003460954 | 0.000684582 | 0.00157194  | 0.00111575  | 9.52E-05    | 0.001233528 |
| 0           | 7.85E-05    | 0.001802517 | 0           | 0.002532737 | 0.000182958 | 0           | 0.00024358  | 0.00019447  | 0           | 6.65E-05    |
| 0           | 9.12E-05    | 0.004962698 | 0           | 0.003911842 | 0           | 0           | 0.010054749 | 0           | 0           | 0           |
| 0           | 0           | 0.000233018 | 0.000174555 | 0.000343682 | 0.000298396 | 0           | 0.000252077 | 0.00040441  | 0           | 0           |
| 0.000101983 | 7.60E-05    | 0           | 0.000263135 | 0           | 0.00637739  | 0           | 0           | 0           | 0           | 0.000204973 |
| 0           | 0           | 0           | 0           | 0           | 0           | 0           | 0           | 0           | 0           | 0           |
| 0.063106504 | 0.003856396 | 0.011704803 | 0.003991319 | 0.006934928 | 0.060201864 | 0.00381362  | 0.00108478  | 0.009624075 | 0.003336366 | 0.016279619 |
| 0.26032577  | 0.099072894 | 0.055941565 | 0.196799129 | 0.023252149 | 0.150907602 | 0.025513186 | 0.092121325 | 0.059936665 | 0.068948599 | 0.15123279  |
| 0.02200216  | 0.010408722 | 0.004889519 | 0.02607905  | 0.002237215 | 0.016246226 | 0.002497888 | 0.01424942  | 0.003697148 | 0.015096909 | 0.027104385 |
| 8.89E-05    | 0           | 0.000223389 | 0.000138081 | 0           | 0           | 0.001933525 | 0.000254909 | 0.000548053 | 0.001763338 | 5.91E-05    |
| 0.000196121 | 0.000146959 | 0.000140581 | 0.000145897 | 0           | 0           | 0.001235586 | 0.000257741 | 0.000227619 | 0.000184362 | 0.000168041 |
| 0.002180865 | 0.000676516 | 0           | 0.000276162 | 0           | 0           | 7.01E-05    | 0.000135952 | 0.000620979 | 0.000220046 | 0           |
| 0.000397472 | 0           | 7.13E-05    | 0.000346505 | 0           | 0           | 0           | 0           | 0.00019889  | 0           | 0           |
| 0.000400087 | 0           | 0           | 0.000182371 | 0           | 0           | 7.35E-05    | 0.000141616 | 9.50E-05    | 9.52E-05    | 0           |
| 0.00025888  | 0           | 7.13E-05    | 0.000528876 | 0           | 0           | 0.000187008 | 0.000283232 | 0.000841968 | 0.0003152   | 7.76E-05    |
| 0.000721725 | 0.000243242 | 0           | 0.00200087  | 5.25E-05    | 0           | 0.000190347 | 0.000118958 | 0.001356873 | 0.000564982 | 0.000129262 |
| 0.000455001 | 8.87E-05    | 6.55E-05    | 0.000786801 | 0           | 0           | 0.00011688  | 0           | 0.00081766  | 0.000127864 | 0           |
| 0           | 0           | 0           | 0           | 0           | 0           | 0           | 0           | 0           | 0.00011597  | 0           |
| 0           | 0           | 0           | 0.000664351 | 8.54E-05    | 0           | 0.000153613 | 0.000167107 | 0.000696116 | 0.001204303 | 0.000131109 |
| 0.01981868  | 0.062910946 | 0.006848022 | 0.01877379  | 0.000967563 | 0.002402412 | 0.074348896 | 0.001713556 | 0.015657078 | 0.059742368 | 0.011024198 |
| 0.07921719  | 0.058894922 | 0.085532879 | 0.204523842 | 0.117136365 | 0.035256424 | 0.121845498 | 0.192898232 | 0.144529083 | 0.215290787 | 0.238082048 |
| 0.006738717 | 0.030060633 | 0.010085234 | 0.069199365 | 0.020566177 | 0.007664629 | 0.015919026 | 0.010253011 | 0.064020543 | 0.052867431 | 0.01982509  |
| 0.01538373  | 0.042278466 | 0.02515435  | 0.029127251 | 0.019193639 | 0.006656183 | 0.050989638 | 0.019993372 | 0.031610281 | 0.044868478 | 0.034343054 |
| 0.006050986 | 0.029982086 | 0.006295328 | 0.00821451  | 0.00331423  | 0.002182426 | 0.024204132 | 0.005194482 | 0.006231893 | 0.011876513 | 0.016397802 |

| H081        | H082        | H083        | H084        | H085        | H086        | H087        | H088        | H089        | H090        | H091        |
|-------------|-------------|-------------|-------------|-------------|-------------|-------------|-------------|-------------|-------------|-------------|
| 0.015218531 | 0.002138607 | 0.002027777 | 0.01072946  | 0.005225129 | 0.001919413 | 0.004415497 | 0.00407891  | 0.000577793 | 0.000321213 | 0.025365479 |
| 0.001009221 | 0.00017502  | 0.000168388 | 0.000933956 | 0.000422499 | 0.000133098 | 0.000180685 | 0           | 0           | 0           | 0.001723565 |
| 0.002682551 | 0.000611373 | 0.000735217 | 0.001573752 | 0.000531425 | 6.77E-05    | 0.000750973 | 0           | 0.000100851 | 0           | 0.005079845 |
| 0.002221779 | 0.000290102 | 0.002679986 | 0.000922925 | 8.58E-05    | 0.000196144 | 0.000578758 | 0.000172994 | 0.00013867  | 0.00041131  | 0.003260238 |
| 0.000662243 | 4.32E-05    | 0.000101982 | 0.000185688 | 0           | 0           | 0           | 0           | 0           | 0           | 0.000578848 |
| 0.005322195 | 0.000445943 | 0.000175504 | 0.001628907 | 0.000442304 | 0.000165789 | 0.000575934 | 0.000195921 | 0           | 0.00059542  | 0.007257663 |
| 0.001925168 | 0.000112684 | 0.00015653  | 0.000786876 | 8.25E-05    | 7.47E-05    | 0.000152453 | 0           | 0           | 0           | 0.003439343 |
| 0.001363661 | 0.000153443 | 0.000237167 | 0.00045227  | 0.000155137 | 5.84E-05    | 0.000443244 | 5.21E-05    | 0           | 0           | 0.002546412 |
| 0.000632395 | 0.000134262 | 0.000377095 | 0.00035483  | 0.000115527 | 0           | 4.80E-05    | 0           | 0           | 0           | 0.001380929 |
| 0.013815695 | 0.004871803 | 0.008457372 | 0.009243955 | 0.050330243 | 0.001286614 | 0.002961545 | 0.006083975 | 0.001371996 | 0.001707915 | 0.005256354 |
| 7.28E-05    | 0.000321271 | 0.001117056 | 0.000172819 | 0.227387204 | 0.000144773 | 0.000982476 | 0.002790833 | 0.000310958 | 0.001096826 | 0.023325235 |
| 0.002190066 | 0.03183455  | 0.001717088 | 0.000196719 | 0.007598388 | 0.002617593 | 0.000635222 | 0.001782048 | 0.005208541 | 0.002127059 | 0.012036403 |
| 0.148898345 | 0.23414626  | 0.168414587 | 0.089939201 | 0.02766711  | 0.149653478 | 0.142188043 | 0.048867722 | 0.369211827 | 0.028823027 | 0.054832212 |
| 0.121563565 | 0.047118875 | 0.177384239 | 0.117698645 | 0.005971105 | 0.049201879 | 0.118879638 | 0.051650218 | 0.027610101 | 0.143840929 | 0.052301375 |
| 0.152994924 | 0.049048895 | 0.05320365  | 0.007828314 | 0.002003571 | 0.021949488 | 0.051740931 | 0.007972321 | 0.011230195 | 0.012221778 | 0.052553161 |
| 0           | 0.026224304 | 0.033288746 | 0.014237309 | 0.000617245 | 0.015089106 | 0.006784169 | 0.002092604 | 0.00321463  | 0.000219365 | 0.007561363 |
| 0.001205096 | 0.01093998  | 0.011640151 | 0.006177345 | 0.00046541  | 0.012417806 | 0.049386376 | 0.000291797 | 0.009076603 | 0           | 0.00387283  |
| 0.0001567   | 0.003390123 | 0.002748764 | 0.001663838 | 0.001897947 | 0.011047131 | 0.006772876 | 5.63E-05    | 0.014732671 | 0           | 0.000363402 |
| 0.002796344 | 0           | 0           | 0.000564418 | 0.000412597 | 0.006099156 | 0.037463969 | 0.000443949 | 0.000388697 | 0           | 0.004417933 |
| 0.064278612 | 0.210880521 | 0.040249594 | 0.024863813 | 0.013968887 | 0.11533055  | 0.272219352 | 0.114763905 | 0.083981687 | 0.173940975 | 0.118370504 |
| 0.000524198 | 0.002891435 | 0.005094345 | 0.007092916 | 0.021877548 | 0.001814335 | 0.000104459 | 0.009062393 | 0.002231332 | 0.102866634 | 0.009793691 |
| 0.000830136 | 0.040379387 | 0.004620011 | 0.004982323 | 0.013876465 | 0.043506688 | 0.012769369 | 0.00460623  | 0.019859271 | 0.027005429 | 0.031283744 |
| 6.90E-05    | 0.000122275 | 0.000434015 | 0.003719276 | 0.000290468 | 0.000261526 | 0.000129868 | 0.000404348 | 0.006393542 | 0.000180193 | 0.000106425 |
| 0.006588852 | 0.002081066 | 0.000258512 | 0.252469559 | 0.000980331 | 0.001088134 | 0.024194892 | 0.045943496 | 0.000359282 | 0.049991774 | 0           |
| 0           | 0.000748033 | 0.006439081 | 0.021887289 | 0.000244257 | 0.001718598 | 0.020293218 | 0.030125994 | 0.000247926 | 0.000164524 | 0.003182366 |
| 0.000550315 | 0.00059459  | 0.003972546 | 0.003164051 | 0           | 0.000481021 | 0.010925815 | 0.00268662  | 0.000165984 | 0.001727501 | 0.000742379 |
| 0.000759248 | 0.010594734 | 0.005350485 | 0.005785745 | 0.002960797 | 0.021108869 | 0.005697234 | 0.004228978 | 0.020199643 | 0.001057654 | 0.011937765 |
| 0.027502672 | 0.026945964 | 0.023524585 | 0.03090511  | 0.02524434  | 0.037449563 | 0.01552482  | 0.078762362 | 0.052121131 | 0.005464545 | 0.056021057 |
| 0.000820808 | 0.01924746  | 0.008111108 | 0.003754208 | 0.014741269 | 0.04520894  | 0.004486077 | 0.03467178  | 0.022250283 | 0.000591503 | 0.024994289 |
| 0           | 0.00335416  | 0.007971179 | 0.024628486 | 0.009872623 | 0.036606609 | 0.000810261 | 0.130637681 | 0.002611624 | 0.001280936 | 0           |
| 0.00029661  | 0.000522664 | 0.00538606  | 0.00283496  | 0.00187154  | 0.006360681 | 0.001665693 | 0.049749367 | 0.001737581 | 0.000830454 | 0.004360827 |
| 0.003574247 | 0.027890595 | 0.03379154  | 0.007069015 | 0.006482725 | 0.022129287 | 0.026749895 | 0.004206051 | 0.124164564 | 0.003200382 | 0.006388093 |
| 0.001565132 | 0.005617439 | 0.004017607 | 0.000801584 | 0.000627148 | 0.005499047 | 0.00173345  | 0.001525683 | 0.007250777 | 0           | 0.002234924 |
| 0           | 0.000323668 | 5.69E-05    | 0.00011031  | 0           | 0.000966711 | 0.001019178 | 0           | 0.00072907  | 0.001911611 | 0.000251786 |
| 0.000596951 | 0.015512091 | 0.007527677 | 0.01138948  | 0           | 0.0060688   | 0.004152939 | 0.001183864 | 0.030749093 | 0.001088992 | 0.00225569  |
| 7.46E-05    | 0.000791189 | 0.000619006 | 0.000774007 | 0           | 0.000819603 | 0.000496885 | 6.04E-05    | 0.003160002 | 0           | 0.000552891 |
| 0.000764844 | 0           | 0.000120955 | 0.002509546 | 0           | 0.000154113 | 0.037226819 | 0           | 0           | 0           | 0           |
| 0           | 0           | 5.22E-05    | 0.000123179 | 0           | 0.00156682  | 0.00141725  | 0           | 0.000850932 | 0.002275914 | 9.34E-05    |
| 0.000693956 | 9.83E-05    | 0.000130442 | 0.000580965 | 0.000458808 | 0.000453    | 8.75E-05    | 0.000477297 | 0           | 0           | 0.001521098 |
| 0           | 0           | 0           | 0           | 0           | 0           | 0           | 0           | 0           | 0           | 0           |
| 0.01231772  | 0.003414099 | 0.015157337 | 0.023659599 | 0.002607614 | 0.008242733 | 0.013554221 | 0.015217233 | 0.001855241 | 0.000842206 | 0.012363465 |
| 0.087259377 | 0.056428527 | 0.11608371  | 0.194913618 | 0.145382709 | 0.083900751 | 0.0653375   | 0.197980345 | 0.02222507  | 0.075594832 | 0.099769499 |
| 0.017526121 | 0.008770205 | 0.01021715  | 0.055347908 | 0.031733667 | 0.009552697 | 0.006693826 | 0.016815865 | 0.002300667 | 0.010874249 | 0.031984592 |
| 0           | 0.000124672 | 0.000258512 | 0           | 0           | 0.000112082 | 0.000101635 | 0.000379337 | 0.00171657  | 0           | 0.000205063 |
| 6.53E-05    | 0.000141455 | 6.40E-05    | 4.41E-05    | 0           | 0.000133098 | 6.21E-05    | 0           | 0.00264314  | 0.000548413 | 0.000301105 |
| 0           | 0           | 0           | 0           | 0           | 0           | 0           | 0.000104213 | 0.000178591 | 0           | 0           |
| 0           | 0           | 0.000123327 | 0           | 0           | 6.77E-05    | 0           | 0           | 7.98E-05    | 0.001085075 | 0           |
| 0           | 0           | 5.22E-05    | 0           | 0           | 9.81E-05    | 0           | 0.000147983 | 0.000384495 | 0.000403475 | 0           |
| 0           | 0           | 0.000163645 | 0           | 0           | 0.000177464 | 0           | 0.00017091  | 0.000390798 | 0.000556248 | 0           |
| 0           | 0           | 0.00032729  | 0           | 0           | 0           | 0           | 0.001117167 | 0.000399202 | 0.002009542 | 0           |
| 0           | 0           | 0.000232424 | 0           | 0           | 0           | 0           | 0.000502308 | 7.98E-05    | 0.000301627 | 0           |
| 0           | 0           | 0           | 0           | 0           | 0           | 0           | 0           | 0           | 0           | 0           |
| 0           | 0           | 0.000220565 | 0           | 0           | 0.000123758 | 0           | 8.34E-05    | 7.77E-05    | 0.000176276 | 0           |
| 0.007006718 | 0.009710041 | 0.003303735 | 0.001266723 | 0.00531425  | 0.004751831 | 0.012966994 | 0.005640026 | 0.002449842 | 0.069499612 | 0.01279176  |
| 0.275944536 | 0.063124859 | 0.180419975 | 0.043182583 | 0.316610498 | 0.197841945 | 0.012052275 | 0.088598018 | 0.055014298 | 0.124074553 | 0.265091577 |
| 0.002473618 | 0.047627154 | 0.01708076  | 0.001834819 | 0.014942616 | 0.034421001 | 0.006778522 | 0.018495785 | 0.039945456 | 0.112651891 | 0.013783329 |
| 0.010843996 | 0.020868198 | 0.025758697 | 0.003377316 | 0.029789509 | 0.027394829 | 0.012103092 | 0.008824786 | 0.041290138 | 0.031028431 | 0.010920238 |
| 0.002341169 | 0.00919457  | 0.008177515 | 0.001636261 | 0.00871075  | 0.012466842 | 0.003704049 | 0.006294486 | 0.006731814 | 0.005409704 | 0.011545809 |

| H092        | H093        | H094        | H095        | H096        | H097        | H098        | H099        | H100        | H101        | H102        |
|-------------|-------------|-------------|-------------|-------------|-------------|-------------|-------------|-------------|-------------|-------------|
| 0.001859828 | 0.000498564 | 0.000963931 | 0.000624347 | 0.01368115  | 0.000705606 | 0.012010641 | 0.076516597 | 0.007084854 | 0.008287724 | 0.002175538 |
| 6.24E-05    | 6.76E-05    | 0           | 5.71E-05    | 0.001535834 | 0           | 0.001153942 | 0.004868339 | 0.000780177 | 0.001192033 | 0.000229688 |
| 0.000195863 | 0.000227987 | 0           | 0.002387332 | 0.00189496  | 0           | 0.001081589 | 0.00411201  | 0.001082408 | 0.000686159 | 0           |
| 0           | 8.52E-05    | 0.000245364 | 0.002101614 | 0.000827135 | 9.16E-05    | 0.000706836 | 0.002654695 | 0.001068351 | 0.000772265 | 0           |
| 0           | 0           | 0           | 0.000188362 | 0.000345754 | 0           | 0.000213349 | 0.000389065 | 0.000234288 | 8.34E-05    | 0           |
| 0.00014733  | 0.000666423 | 9.06E-05    | 0.002577811 | 0.001747871 | 0.000131347 | 0.001875619 | 0.00592485  | 0.001609555 | 0.001364245 | 0.000223188 |
| 8.49E-05    | 0.000170364 | 0           | 0.000747099 | 0.000529137 | 0.000143565 | 0.00066586  | 0.001708866 | 0.000719263 | 0.000618888 | 6.07E-05    |
| 0           | 0           | 0           | 0.001013769 | 0.000645662 | 0           | 0.000528735 | 0.001556258 | 0.000477947 | 0.000118396 | 0           |
| 7.28E-05    | 0           | 8.47E-05    | 0.000560854 | 0.000200575 | 0           | 0.000274571 | 0.000895519 | 0.000400632 | 0.00023141  | 0           |
| 0.000230529 | 0.002956312 | 0.003107949 | 0.000994722 | 0.008007733 | 0.00078808  | 0.018362887 | 0.00440884  | 0.002274932 | 0.008115511 | 0.000764905 |
| 0.000485323 | 0.001573359 | 0.001790576 | 0.001970395 | 0.00063611  | 0           | 0           | 0.002349481 | 0.000161658 | 0.000277154 | 8.88E-05    |
| 0.000287727 | 0.000348243 | 0.001077851 | 0.000338629 | 0.000135627 | 0           | 0.000116878 | 0.000362233 | 6.09E-05    | 0.001348101 | 0.000777907 |
| 0.157321015 | 0.164020183 | 0.070326101 | 0.21285138  | 0.100532193 | 0.16728369  | 0.051877289 | 0.035009106 | 0.047037903 | 0.057196058 | 0.274358335 |
| 0.063378024 | 0.128386605 | 0.055020038 | 0.096661545 | 0.299132368 | 0.127198529 | 0.145929109 | 0.046895701 | 0.05097159  | 0.228620094 | 0.109426971 |
| 0.031856275 | 0.031840479 | 0.020172456 | 0.048392149 | 0.020968722 | 0.044444037 | 0.013121913 | 0.006506677 | 0.010692882 | 0.049435735 | 0.020624275 |
| 0.019151204 | 0.013902181 | 0.002050545 | 0.049433432 | 0.02008619  | 0.0070469   | 0.023674358 | 0.004623496 | 0.01375502  | 0.003654133 | 0.103730268 |
| 0.007390781 | 0.017464787 | 0.028114667 | 0.057806025 | 0.039137029 | 0.021055172 | 0.071566652 | 0.010219654 | 0.003921973 | 0.000715758 | 0.015783486 |
| 0.011082704 | 0.00290871  | 0.001063246 | 0.014525052 | 0.002794683 | 0.016677969 | 0.023314447 | 0.009055814 | 0.002549048 | 9.15E-05    | 0.00290794  |
| 0.022073544 | 0.011842784 | 0.000400178 | 0.002404263 | 0.010697353 | 0.002605551 | 0           | 4.36E-05    | 0.002593563 | 0.001173197 | 0.002554741 |
| 0.191567508 | 0.075107855 | 0.13003143  | 0.026656423 | 0.025274406 | 0.106289977 | 0.074022953 | 0.081911515 | 0.134305314 | 0.028032957 | 0.081160143 |
| 0.012651339 | 0.013646636 | 0.059392782 | 0.020523012 | 0.007411737 | 0.037372701 | 0.137879344 | 0.280020862 | 0.082040457 | 0.000815318 | 0.000502714 |
| 0.02371671  | 0.001688605 | 0.00119177  | 0.010222352 | 0.038158986 | 0.024690114 | 0.000293123 | 0.020258191 | 0.016065094 | 0.001014439 | 0.028121648 |
| 0.003849654 | 0           | 0.000324231 | 0           | 4.58E-05    | 0.00329283  | 0           | 0.00021801  | 4.69E-05    | 0           | 0.016316536 |
| 0.000362259 | 0.003750507 | 0.000473203 | 0.002387332 | 0.006303797 | 0.004474949 | 0.018986238 | 0.00504107  | 0.000288174 | 0.025511659 | 0.00449409  |
| 0.009657934 | 0.002728325 | 0.003773938 | 0.002063518 | 0.003358205 | 0.002434495 | 0.078961527 | 0.014511103 | 0.023360807 | 0.01497441  | 0.00399571  |
| 0.006676662 | 0.000686466 | 0.000841249 | 0.001092077 | 0.003255052 | 0.001117974 | 0           | 0.019736644 | 0.026116029 | 0.008508371 | 0.005111648 |
| 0.005891478 | 0.009615529 | 0.00188989  | 0.002924905 | 0.005362048 | 0.006998027 | 0.000450816 | 0.006508447 | 0.000524804 | 0.012208248 | 0.037543202 |
| 0.042204061 | 0.015057147 | 0.023169407 | 0.02175689  | 0.050982437 | 0.015624141 | 0.004654727 | 0.027261354 | 0.00613599  | 0.026426538 | 0.017202787 |
| 0.025351209 | 0.001778798 | 0.006072768 | 0.018087002 | 0.014252312 | 0.014683332 | 0.005419074 | 0.01008214  | 0.000281145 | 0.007954062 | 0.015499626 |
| 0.025186546 | 0.00197171  | 0.008053209 | 0.002226483 | 0.002391622 | 0.000956081 | 3.15E-05    | 0           | 0           | 0.01559599  | 0.000253524 |
| 0.005381889 | 0.00147064  | 0.00160071  | 0.001329117 | 0.003788009 | 0.005599032 | 0           | 0.000830116 | 0           | 0.001875501 | 0.003629508 |
| 0.024066836 | 0.016059287 | 0.005272413 | 0.014548333 | 0.010164395 | 0.034547221 | 0.000656745 | 0.008748923 | 0.001492411 | 0.004515195 | 0.023272191 |
| 0.005264025 | 0.00244021  | 0.001355346 | 0.003348191 | 0.001944626 | 0.000720879 | 3.52E-05    | 0.002565814 | 0.000728634 | 0.001033275 | 0.01005428  |
| 0           | 0.000616316 | 0.000312547 | 0.000110054 | 0           | 0.014249583 | 0           | 3.86E-05    | 0           | 0.000150686 | 0.002123533 |
| 0.003918986 | 0.000756615 | 0.000221996 | 0.000308999 | 0.00419107  | 0.020590877 | 0.000402581 | 0.003265124 | 0           | 0.000443985 | 0.049469658 |
| 0.00114051  | 0           | 0           | 0           | 0.000993326 | 0.001026337 | 0.000231901 | 0.000223041 | 0           | 0.000247555 | 0.002498402 |
| 0.000155997 | 5.76E-05    | 0           | 0           | 0.00047565  | 0.000369603 | 4.45E-05    | 0.000590305 | 0           | 0.008150492 | 0.000710734 |
| 0.000214929 | 0.00025304  | 9.35E-05    | 0           | 0           | 0.000296294 | 5.57E-05    | 0           | 0           | 0           | 0.000728069 |
| 0           | 0           | 0.000131445 | 0.000139684 | 0.000993326 | 0           | 0.000294979 | 0.00337916  | 0.000316288 | 0.000473584 | 0.000169016 |
| 0           | 0           | 0           | 0           | 0           | 0           | 0           | 0           | 0           | 0           | 0           |
| 0.024644024 | 0.00596273  | 0.00354902  | 0.00842762  | 0.02040329  | 0.001799143 | 0.00091833  | 0.010858592 | 0.009997048 | 0.065101686 | 0.011100879 |
| 0.10531169  | 0.14245915  | 0.048620118 | 0.036385647 | 0.209012902 | 0.03619669  | 0.142227961 | 0.09162136  | 0.149339544 | 0.312457956 | 0.080057205 |
| 0.010112058 | 0.014250425 | 0.005348359 | 0.004797945 | 0.025188445 | 0.003051518 | 0.017520621 | 0.020036827 | 0.016636756 | 0.029784681 | 0.00608674  |
| 0.000565055 | 0.000686466 | 0.000481966 | 0.00032593  | 7.83E-05    | 0.00025353  | 3.71E-05    | 0           | 0           | 0.00013185  | 0.000312029 |
| 0.000526922 | 0.00017788  | 0.00078575  | 6.98E-05    | 0           | 0.000277966 | 0           | 0.000591982 | 0           | 0           | 0.000171183 |
| 6.76E-05    | 0.000481027 | 0.000201549 | 6.14E-05    | 0           | 0.000513168 | 0           | 0           | 0           | 0           | 0           |
| 0           | 8.27E-05    | 0.000703962 | 0           | 0           | 0.001154629 | 0           | 0           | 0           | 0           | 8.88E-05    |
| 0           | 7.01E-05    | 0.000733172 | 0.000122753 | 0           | 0.000745316 | 0           | 0           | 0           | 0           | 0           |
| 6.93E-05    | 0.00029062  | 0.000286258 | 0.000120636 | 0           | 0.000152729 | 0           | 0           | 0           | 0           | 0           |
| 0           | 0.001956678 | 0.0009318   | 0           | 0           | 0.000653679 | 0           | 0           | 0           | 0           | 0           |
| 5.89E-05    | 0.000438436 | 0.00049365  | 0           | 0           | 0.000418477 | 0           | 0           | 0           | 0           | 0           |
| 0           | 8.52E-05    | 0.0003476   | 7.41E-05    | 0           | 0.00024742  | 0           | 0           | 0           | 0           | 0           |
| 6.41E-05    | 0.00035576  | 0.000315468 | 0.000351327 | 0           | 0.000375712 | 0           | 0           | 0           | 0           | 0           |
| 0.007832771 | 0.001528263 | 0.029572248 | 0.020218246 | 0.003069758 | 0.014939917 | 0.034907666 | 0.027979111 | 0.030312118 | 0.002287197 | 0.004654438 |
| 0.101202042 | 0.261302882 | 0.320837277 | 0.214140285 | 0.020202715 | 0.158281864 | 0.079525511 | 0.115537094 | 0.211917737 | 0.052793878 | 0.030637385 |
| 0.018301888 | 0.014728946 | 0.074839053 | 0.035704157 | 0.010538803 | 0.058687511 | 0.018051211 | 0.020768    | 0.108336887 | 0.005650721 | 0.01402182  |
| 0.01183236  | 0.023309766 | 0.045062334 | 0.03594543  | 0.005940851 | 0.027610285 | 0.011969827 | 0.003042083 | 0.030103602 | 0.005572687 | 0.014325182 |
| 0.017121513 | 0.007187846 | 0.038180448 | 0.019894433 | 0.002681979 | 0.011133919 | 0.005953375 | 0.006273667 | 0.004177346 | 0.004305311 | 0.00198052  |

| H103        | H104        | H105        | H106        | H107        | H108        | H109        | H110        | H111        | H112        | H113        |
|-------------|-------------|-------------|-------------|-------------|-------------|-------------|-------------|-------------|-------------|-------------|
| 0.001041223 | 0.062322585 | 0.06275508  | 0.004727689 | 0.07169231  | 0.006713052 | 0.001720873 | 0.00818018  | 0.001463623 | 0.002980313 | 0.009674819 |
| 0           | 0.005457856 | 0.008887895 | 0.000235708 | 0.011680923 | 0.000426351 | 0.000115891 | 0.001319719 | 0.000479182 | 0.000129926 | 0.003285748 |
| 0.000198948 | 0.006838272 | 0.021229069 | 0.000595067 | 0.022768741 | 0.000840859 | 0.000122451 | 0.001968148 | 0.000480812 | 0.000667622 | 0.004253017 |
| 0.000132012 | 0.005404943 | 0.01192453  | 0.000732241 | 0.010436482 | 0.0006415   | 0.000150877 | 0.001211648 | 0.000383019 | 0.000403771 | 0.001955752 |
| 0           | 0.001355515 | 0.003523226 | 0.000212524 | 0.005171871 | 0.000185542 | 8.53E-05    | 0.000266022 | 0.000145058 | 5.60E-05    | 0.000649089 |
| 6.69E-05    | 0.010083105 | 0.025730039 | 0.001493463 | 0.027638668 | 0.000663212 | 6.12E-05    | 0.003075881 | 0.000899688 | 0.000993438 | 0.006613919 |
| 0           | 0.002844871 | 0.009724224 | 0.000297533 | 0.006690218 | 0.000416482 | 5.47E-05    | 0.000928999 | 0.000234701 | 0.0003538   | 0.002182721 |
| 0           | 0.003036292 | 0.008135199 | 0.000511989 | 0.009176944 | 0.000106588 | 0           | 0.000791831 | 0.000291747 | 0.000195889 | 0.001945146 |
| 0           | 0.001683889 | 0.003650956 | 0.00034197  | 0.004315644 | 0.000132248 | 0           | 0.000278492 | 8.96E-05    | 0           | 0.000876058 |
| 0.007755253 | 0.010092443 | 0.007317118 | 0.001800657 | 0.021237453 | 0.001521836 | 0.004615963 | 0.03316132  | 0.001722772 | 0.001761003 | 0.009146639 |
| 0.004562789 | 0.000678536 | 0.000615842 | 0.004882252 | 0.011387606 | 0.000523069 | 0.000561962 | 0.002028419 | 0.00162661  | 0.00051171  | 0.001060603 |
| 0.003032562 | 0.000544696 | 0.000162704 | 0.000809523 | 0.002840431 | 0.001048113 | 0.002466512 | 0.012956108 | 0.000264039 | 0.003805846 | 0.006187557 |
| 0.140931411 | 0.078269734 | 0.080661643 | 0.135883877 | 0.073693768 | 0.06356378  | 0.141091913 | 0.1857541   | 0.07426827  | 0.080556405 | 0.063612838 |
| 0.025392829 | 0.105187064 | 0.174541844 | 0.041067333 | 0.174825627 | 0.164543795 | 0.089861499 | 0.119649682 | 0.100615113 | 0.043641299 | 0.048323187 |
| 0.008259131 | 0.010876805 | 0.047933811 | 0.022801876 | 0.073984929 | 0.055883543 | 0.047388515 | 0.049182917 | 0.123606054 | 0.020250538 | 0.041734722 |
| 0.004027302 | 0.005274216 | 0.052932017 | 0.015634026 | 0.017258261 | 0.042021219 | 0.055159777 | 0.041270838 | 0.00762942  | 0.010933811 | 0.031671722 |
| 6.14E-05    | 0.009449701 | 0.000599116 | 0.013514584 | 0.003170413 | 0.014715026 | 0.02884813  | 0.009842818 | 0.016592073 | 0.028277995 | 0.034768683 |
| 0.003852526 | 0.003440924 | 0.00043337  | 0.000840435 | 0           | 0.008426351 | 0.00527851  | 0.004445479 | 0.001641279 | 0.012396983 | 0.007044524 |
| 0.000687951 | 0.004556773 | 0           | 0.001704055 | 0.002456531 | 0.00452603  | 0.007185246 | 0.003098742 | 0.006741141 | 0.005562851 | 0.018698428 |
| 0.042152803 | 0.148625809 | 0.097611749 | 0.082211948 | 0.089129581 | 0.151609178 | 0.164018665 | 0.041455806 | 0.346430422 | 0.236244286 | 0.192242751 |
| 0.002722055 | 0.002729706 | 0.00076334  | 0.0072915   | 0.002743378 | 0.005899827 | 0.001981081 | 0.006698354 | 0.001685285 | 0.113269889 | 0.022915385 |
| 0.00063589  | 0.006245331 | 0.019962411 | 0.039114046 | 0.001501093 | 0.034587713 | 0.025896188 | 0.013486074 | 0.002166097 | 0.024835943 | 0.002869991 |
| 0.000141309 | 0.000314368 | 0.000997512 | 5.41E-05    | 0.000483111 | 0.000341475 | 0.000402339 | 0.000910294 | 0           | 0.002386649 | 0           |
| 0.000656342 | 0.116214828 | 0.024340213 | 0.00011399  | 0.007509781 | 0.00949815  | 0.011315779 | 0.0098158   | 0.034719483 | 0.005087121 | 0.001824237 |
| 0.000115278 | 0.0003844   | 0.006971942 | 0.011200006 | 0.000321355 | 0.006728843 | 0.001257309 | 0.01382068  | 0.01337471  | 0.01438186  | 0.003364232 |
| 0.000351413 | 0.001024029 | 0.005217172 | 0.00141425  | 9.92E-05    | 0.000325685 | 0.000443885 | 0.01267346  | 0.005719213 | 0.002740449 | 0.004149078 |
| 0.004388012 | 0.001909549 | 0.004817255 | 0.020023609 | 0.001449332 | 0.00583469  | 0.004502259 | 0.008219668 | 0.001333233 | 0.013836169 | 0.003858473 |
| 0.062614697 | 0.012428411 | 0.016428541 | 0.038828105 | 0.018004495 | 0.010044905 | 0.016073873 | 0.021300474 | 0.01200236  | 0.011393551 | 0.014943894 |
| 0.048567481 | 0.00231885  | 0.010540785 | 0.025755957 | 0.000590948 | 0.009926474 | 0.013025719 | 0.003183952 | 0.00625055  | 0.011063738 | 0.003678171 |
| 0.036533917 | 0.00491316  | 0.002793339 | 0.13902923  | 0.002739064 | 0           | 0           | 0.006220345 | 0.005601862 | 0.007046012 | 0.00059818  |
| 0.018820108 | 0.002376432 | 0.014021434 | 0.006708025 | 0.000450759 | 0.001267209 | 0.00444322  | 0.003539341 | 0.00188087  | 0.001427192 | 0.003828776 |
| 0.021517992 | 0.007951008 | 0.00851839  | 0.014043962 | 0.010831166 | 0.009792253 | 0.016054193 | 0.022890372 | 0.0119991   | 0.012285047 | 0.014752986 |
| 0.004793345 | 0.000266123 | 0.000894112 | 0.003263207 | 0.000222145 | 0.000254626 | 0.002543044 | 0.001893329 | 0.001049636 | 0.002710466 | 0.002732113 |
| 0.000211963 | 0           | 0.000430329 | 0.000112058 | 0           | 0.000260548 | 4.81E-05    | 0.000887433 | 0           | 0           | 0.006372102 |
| 0.00052433  | 0.005476531 | 0.002828312 | 0.000693601 | 0.004102126 | 0.004529978 | 0.005921378 | 0.013544267 | 0.002676246 | 0.002394645 | 0.025789619 |
| 0.001223437 | 0.000395294 | 0.000364944 | 0.000117854 | 0.000224301 | 0.002688379 | 0.000413272 | 0.000939391 | 0.000211883 | 6.00E-05    | 0.003841504 |
| 0           | 0.000227216 | 0           | 0           | 0           | 4.74E-05    | 0.001331654 | 0.000315901 | 0.000309675 | 0           | 0.035519589 |
| 0           | 0.000186753 | 0           | 4.06E-05    | 0.000131561 | 0.000331606 | 0.000104958 | 0.000249396 | 0           | 5.80E-05    | 0.000434847 |
| 0.000325382 | 0.001231013 | 0.001839924 | 9.27E-05    | 0.002855528 | 0.00046188  | 8.75E-05    | 0.000369937 | 0.000193954 | 0.000163907 | 0.000184545 |
| 0           | 0           | 0           | 0           | 0           | 0           | 0           | 0           | 0           | 0           | 0           |
| 0.007602788 | 0.112697647 | 0.037031124 | 0.013023847 | 0.04529377  | 0.021045152 | 0.028461098 | 0.055318052 | 0.021431156 | 0.002730455 | 0.044891076 |
| 0.037993489 | 0.118718875 | 0.084134688 | 0.078003976 | 0.114259957 | 0.207899334 | 0.143092673 | 0.179043276 | 0.111375512 | 0.058061137 | 0.155473771 |
| 0.007407559 | 0.025099602 | 0.009552397 | 0.009308544 | 0.026072872 | 0.014539354 | 0.014298334 | 0.037091381 | 0.009761289 | 0.004601396 | 0.019358123 |
| 0.0007177   | 0           | 0.000106442 | 0           | 0           | 0           | 0.000131197 | 0           | 3.91E-05    | 0           | 0.000108181 |
| 0.000213823 | 0           | 8.82E-05    | 3.48E-05    | 0.0003839   | 0           | 0           | 0.000689995 | 0           | 0.000111937 | 0.00035212  |
| 0           | 0           | 0           | 0           | 0           | 0           | 0           | 0           | 0           | 0           | 0           |
| 6.88E-05    | 0           | 0           | 0           | 0           | 0           | 4.81E-05    | 0           | 0           | 0           | 0           |
| 0           | 0           | 0           | 0           | 0           | 0           | 0.000104958 | 0           | 0           | 0           | 0           |
| 0.000126434 | 0           | 0           | 0           | 0           | 0           | 0.000172743 | 0           | 0           | 0           | 0           |
| 0.000280758 | 0           | 0           | 5.99E-05    | 0           | 4.74E-05    | 0.000758759 | 0           | 0           | 0           | 0           |
| 0           | 0           | 0           | 0           | 0           | 0           | 0.000190236 | 0           | 0           | 0           | 0           |
| 0           | 0           | 0           | 0           | 0           | 0           | 4.81E-05    | 0           | 0           | 0           | 0           |
| 0.000375584 | 0           | 0           | 0           | 0           | 0           | 0.000185863 | 0           | 0           | 0           | 0           |
| 0.005180085 | 0.002583416 | 0.004409734 | 0.011441511 | 0.014926822 | 0.012593141 | 0.000800304 | 0.007409132 | 0.001429396 | 0.024246277 | 0.008959973 |
| 0.385038739 | 0.067084786 | 0.116407861 | 0.202367129 | 0.08095768  | 0.080592154 | 0.125293554 | 0.036673643 | 0.035480632 | 0.170065743 | 0.102102115 |
| 0.055086282 | 0.020517928 | 0.005869508 | 0.020069978 | 0.005475972 | 0.025006662 | 0.010456436 | 0.008739242 | 0.014320035 | 0.020638319 | 0.017625098 |
| 0.047628521 | 0.005929407 | 0.001023362 | 0.007969644 | 0.012043256 | 0.012632618 | 0.013546136 | 0.010763504 | 0.007960283 | 0.034794306 | 0.00793543  |
| 0.005981455 | 0.004751307 | 0.001277302 | 0.019525144 | 0.006770018 | 0.004314829 | 0.007777822 | 0.002446156 | 0.011423756 | 0.009886404 | 0.005608468 |

| H114        | H115        | H116        | H117        | H118        | H119        | H120        | H121        | H122        | H123        | H124        |
|-------------|-------------|-------------|-------------|-------------|-------------|-------------|-------------|-------------|-------------|-------------|
| 0.002105027 | 0           | 0.000682854 | 0.000535493 | 0.003856235 | 0.006985741 | 0.007101821 | 0.005647323 | 0.012113604 | 0.012932257 | 0.005912212 |
| 0.000180197 | 0           | 0           | 0           | 0.000891353 | 0.000631065 | 0.001164096 | 0.001357064 | 0.001384917 | 0.001162406 | 0.001325326 |
| 0.000147434 | 0.000763128 | 0.000288806 | 0.000184076 | 0.00668326  | 0.003158259 | 0.00140836  | 0.006241927 | 0.000565753 | 0.001587965 | 0.001775896 |
| 9.56E-05    | 0.000123583 | 0.000159088 | 6.07E-05    | 0.005334899 | 0.003108361 | 0.000750939 | 0.004597518 | 0.000493561 | 0.001219541 | 0.001416658 |
| 9.56E-05    | 0.000123583 | 0           | 0           | 0.00123883  | 0.000377171 | 0.000277764 | 0.000503565 | 0.000122285 | 0.00044329  | 0.000135983 |
| 4.37E-05    | 0.000262615 | 0.000252093 | 0.000179892 | 0.011053156 | 0.002135347 | 0.002251422 | 0.007914787 | 0.001096147 | 0.003382798 | 0.002301561 |
| 0           | 0           | 8.81E-05    | 8.58E-05    | 0.003995981 | 0.00118288  | 0.000544361 | 0.002037019 | 0.000172378 | 0.001274706 | 0.000635263 |
| 0.000163815 | 0           | 4.16E-05    | 0.000117139 | 0.002998874 | 0.001585    | 0.000720232 | 0.002415404 | 0.000272563 | 0.000788072 | 0.000608879 |
| 0.000117401 | 0           | 0           | 0           | 0.001452226 | 0.000675093 | 0.000434093 | 0.001641564 | 9.13E-05    | 0.000421618 | 0.000373446 |
| 0.002356211 | 0.00118949  | 0.003955171 | 0.000598246 | 0.003527643 | 0.002726787 | 0.041136961 | 0.003880578 | 0.008347809 | 0.016458878 | 0.005879738 |
| 0.000286677 | 0.000590111 | 0.001539482 | 0.000368152 | 0.000315373 | 0.001132982 | 0.002067177 | 0.000344245 | 0.000658572 | 0.000169435 | 0.003143844 |
| 0.001528943 | 0.000274973 | 0.000313281 | 0.000386977 | 0.002405898 | 0.000249491 | 0.000432697 | 0.000873415 | 0.001731146 | 0.000258093 | 0.001146721 |
| 0.207354764 | 0.206900281 | 0.223831866 | 0.407206985 | 0.159958227 | 0.072422761 | 0.029008872 | 0.193781402 | 0.069335726 | 0.101322384 | 0.05931696  |
| 0.149612577 | 0.221211241 | 0.030390696 | 0.019394893 | 0.086701087 | 0.097298456 | 0.182568994 | 0.188489704 | 0.398962196 | 0.132382262 | 0.104891528 |
| 0.145528113 | 0.008088535 | 0.006348833 | 0.008287593 | 0.149088252 | 0.01652069  | 0.018199811 | 0.063190268 | 0.005231745 | 0.024729691 | 0.034959784 |
| 0.005067355 | 0           | 0.004674739 | 0.001010325 | 0.001380464 | 0.047573482 | 0.003051215 | 0.018501027 | 0.008403795 | 0.012559893 | 0.033628369 |
| 0.000169276 | 0.000417094 | 0.002246812 | 0           | 0.047745934 | 0.019228399 | 0.001120826 | 0.019641872 | 0.003686237 | 0.038316048 | 0.002975387 |
| 0.000360394 | 0.000308959 | 0.00258212  | 0.002673282 | 0.005975087 | 0.005239306 | 6.56E-05    | 0.027240863 | 0.002291006 | 0.006091795 | 0.001725156 |
| 0           | 0.00693303  | 0           | 0           | 0.005485976 | 0.006119861 | 0           | 0.002312984 | 0.000103132 | 0.000860968 | 0.002772428 |
| 0.034554122 | 0.035530235 | 0.091514738 | 0.046144449 | 0.174233096 | 0.060078839 | 0.091543418 | 0.097941928 | 0.032417373 | 0.118220613 | 0.168478757 |
| 0.088528556 | 0           | 0.070192056 | 0.000598246 | 0.013838635 | 0.009489454 | 0.017587056 | 0.00018208  | 0.006302846 | 0.019201368 | 0.03598067  |
| 0.004556798 | 0.000160658 | 0.038252088 | 0.031064878 | 0.008533951 | 0.008002783 | 0.001367882 | 0.004219133 | 0.014504796 | 0.024394761 | 0.024466775 |
| 3.55E-05    | 0           | 0.00086397  | 0.000796964 | 0.000264384 | 0.000974481 | 8.10E-05    | 0.00035847  | 0.000175325 | 0           | 0.001315178 |
| 0.039719767 | 0.004649826 | 5.87E-05    | 0.00030749  | 0.001499437 | 0.000610519 | 0.324566326 | 0.002019949 | 0.006691801 | 0.203874161 | 0.007211153 |
| 9.01E-05    | 0.001946439 | 0.00014685  | 0.000397436 | 0.009332769 | 0.07704421  | 0.00243148  | 0.003994378 | 0.025295363 | 0.017116918 | 0.03271911  |
| 0           | 0.003330573 | 9.79E-05    | 0.000422538 | 0.001714722 | 0.054290654 | 0.000643463 | 0.001815109 | 0.020230102 | 0.0203224   | 0.002817079 |
| 0.001029307 | 0.000515961 | 0.014080508 | 0.02264132  | 0.001250161 | 0.005469718 | 0.002117426 | 0.008025742 | 0.006099528 | 0.007267992 | 0.011686411 |
| 0.020613434 | 0.013173993 | 0.017316113 | 0.029853743 | 0.017978139 | 0.027879857 | 0.012884612 | 0.031570951 | 0.017899317 | 0.014015856 | 0.020990077 |
| 0.001528943 | 0.000432542 | 0.028496325 | 0.001321999 | 0.017912043 | 0.008856921 | 0.004307433 | 0.01261757  | 0.005072627 | 0.01339525  | 0.005599654 |
| 0           | 0           | 0.000337756 | 0.001391027 | 0           | 0.018271528 | 0.000307076 | 0.011948995 | 0.004471514 | 0.006403083 | 0.009514744 |
| 0.00052967  | 0           | 0.000330413 | 0.000150607 | 0.003129178 | 0.003064333 | 0.002420314 | 0.004085418 | 0.00196835  | 0.00208248  | 0.002131075 |
| 0.011521681 | 0.016662135 | 0.033078058 | 0.051637438 | 0.01187086  | 0.006834579 | 0.002731577 | 0.021218001 | 0.004938555 | 0.020204189 | 0.005258682 |
| 0.00116855  | 0.005153429 | 0.006916655 | 0.008762425 | 0.000415461 | 0.000940727 | 0.000554132 | 0.001200589 | 0.001888791 | 0.001229392 | 0.000856489 |
| 0.001523483 | 0.002842419 | 0           | 0           | 0.000217173 | 0.000132083 | 4.47E-05    | 0.002827929 | 3.54E-05    | 0.000258093 | 0.000899111 |
| 0.010140171 | 0.001065907 | 0.000560479 | 0.000811607 | 0.011474283 | 0.004027074 | 0.000231702 | 0.063690988 | 0.001698733 | 0.015205844 | 0.003902912 |
| 0.001829272 | 0.000200823 | 0.000230066 | 0           | 0.001410668 | 0.000466694 | 3.63E-05    | 0.006088297 | 0.000472934 | 0.001790893 | 0.000397801 |
| 0.001640884 | 0           | 0           | 0           | 0           | 0           | 8.65E-05    | 0.009644546 | 3.83E-05    | 0.001262885 | 0.000418097 |
| 0.00010921  | 0           | 0.00168878  | 0.000535493 | 0           | 2.64E-05    | 0           | 0.000770995 | 3.68E-05    | 0.000977209 | 0           |
| 0.000122862 | 0.000157569 | 3.92E-05    | 5.44E-05    | 0           | 0.000557685 | 0.0001661   | 0.00013656  | 0.000453781 | 0.00054574  | 0.000416067 |
| 0           | 0           | 0           | 0           | 0           | 0           | 0           | 0           | 0           | 0           | 0           |
| 0.006427023 | 0.016680673 | 0.007631327 | 0.002263295 | 0.018420039 | 0.038164746 | 0.005757667 | 0.010816685 | 0.0136046   | 0.008609684 | 0.021493417 |
| 0.049619675 | 0.117472225 | 0.01893881  | 0.014843201 | 0.102943731 | 0.28913776  | 0.084891044 | 0.066971271 | 0.20644841  | 0.065183384 | 0.230553938 |
| 0.012463619 | 0.018929891 | 0.000976555 | 0.003447237 | 0.012393963 | 0.047256482 | 0.008204501 | 0.004415438 | 0.032053464 | 0.009714954 | 0.025777893 |
| 0.000139243 | 0.001010294 | 0.003619863 | 0.003056076 | 4.72E-05    | 0           | 0.000195412 | 0           | 9.87E-05    | 0           | 0           |
| 0.000161085 | 0.000627186 | 0.01480497  | 0.001242511 | 0           | 0           | 3.63E-05    | 0.000179235 | 3.68E-05    | 0.000193078 | 0.000140042 |
| 0           | 0.000410915 | 4.90E-05    | 4.81E-05    | 0           | 0           | 0           | 0           | 0           | 4.33E-05    | 0           |
| 0.000439571 | 0.00052523  | 0           | 7.32E-05    | 0           | 0           | 0           | 0           | 0           | 0           | 0           |
| 0.000562433 | 0.000271884 | 0           | 5.65E-05    | 0           | 0           | 0           | 8.82E-05    | 2.21E-05    | 0           | 0           |
| 0.00021842  | 0.000305869 | 0.000511529 | 0.001152565 | 0           | 0           | 0           | 4.55E-05    | 0           | 0           | 0           |
| 0.000275756 | 0.000722963 | 0.000188458 | 0.000407895 | 0           | 0           | 4.89E-05    | 0.000247515 | 0           | 3.35E-05    | 0           |
| 9.28E-05    | 0           | 7.34E-05    | 6.69E-05    | 0           | 0           | 3.77E-05    | 0.00011949  | 0           | 6.50E-05    | 0           |
| 0.000125592 | 0           | 0.000315728 | 0.000652632 | 0           | 0           | 0           | 8.25E-05    | 0           | 0           | 0           |
| 0.000166546 | 0.000973219 | 0.000531109 | 0.000901553 | 0           | 0           | 0.000142371 | 0           | 2.50E-05    | 0           | 6.29E-05    |
| 0.030393211 | 0.011867098 | 0.002714285 | 0.008743599 | 0.008456524 | 0.002500778 | 0.004699652 | 0.002691369 | 0.003026191 | 0.011722567 | 0.012169455 |
| 0.117941605 | 0.178136238 | 0.235831993 | 0.243155728 | 0.047687392 | 0.032545334 | 0.129030367 | 0.032253751 | 0.066344894 | 0.03525439  | 0.085054261 |
| 0.013451972 | 0.025285169 | 0.066031294 | 0.016899411 | 0.011268441 | 0.006482357 | 0.001224115 | 0.014751319 | 0.004749971 | 0.011257605 | 0.013478544 |
| 0.026308748 | 0.076878159 | 0.047559958 | 0.06151896  | 0.013217332 | 0.005377259 | 0.005770229 | 0.027858228 | 0.005479262 | 0.008438278 | 0.005680838 |
| 0.006757384 | 0.016893854 | 0.018625529 | 0.003489073 | 0.010401638 | 0.003165597 | 0.003548119 | 0.004509323 | 0.002354359 | 0.005352977 | 0.005603713 |

| H125        | H126        | H127        | H129        | H130        | H131        | H132        | H133        | H135        | H136        | H137        |
|-------------|-------------|-------------|-------------|-------------|-------------|-------------|-------------|-------------|-------------|-------------|
| 0.015785991 | 0.004394595 | 0.001861513 | 0.003136615 | 0.002039504 | 0.020954368 | 0.008000825 | 0.005773243 | 0.000976325 | 0.001312199 | 0.001412512 |
| 0           | 0.000288203 | 0.000596786 | 0.000172071 | 0           | 0.002034026 | 0.001063004 | 0.000232992 | 0           | 0.000211885 | 8.59E-05    |
| 0.168888842 | 0.000498889 | 0.00017215  | 0.000211402 | 0           | 0.002859334 | 0.000321326 | 0.003859826 | 0           | 0           | 0           |
| 0.123040371 | 0.00027429  | 0.000174445 | 7.87E-05    | 0.000204769 | 0.000981271 | 7.28E-05    | 0.003352605 | 0           | 0           | 0           |
| 0.034524547 | 0           | 9.41E-05    | 0           | 0           | 0.000477639 | 0           | 0.00045155  | 0           | 0           | 0           |
| 0.236276951 | 0.000657897 | 0.000107881 | 0.000157322 | 0.000155625 | 0.004133037 | 0.000828577 | 0.004346428 | 0           | 8.55E-05    | 0           |
| 0.082321019 | 0.00014907  | 0.000107881 | 0           | 0.000155625 | 0.000812311 | 0.000191987 | 0.002595898 | 0           | 0           | 9.97E-05    |
| 0.093442967 | 4.57E-05    | 0.000188217 | 0.000223693 | 0           | 0.001046256 | 6.87E-05    | 0.002024759 | 0           | 0           | 0           |
| 0.04350449  | 0.000137145 | 0.000107881 | 0           | 0           | 0.000445146 | 0           | 0.000542273 | 0           | 0           | 5.54E-05    |
| 0.000201976 | 0.008033901 | 0.001388675 | 0.013419107 | 0.00456636  | 0.024050896 | 0.007057055 | 0.057398412 | 0.007205886 | 0.012947282 | 0.003500813 |
| 0.000366745 | 0.00919665  | 0.000922723 | 0.00698118  | 0.014645114 | 0.081312304 | 0.000499167 | 8.04E-05    | 0.000222967 | 0           | 0.000722874 |
| 0           | 0.000983865 | 9.18E-05    | 0.003615956 | 0.003993005 | 0.012428354 | 0.001319661 | 0.0036557   | 0.03455312  | 0.000516702 | 0.000456989 |
| 0.010125358 | 0.115100235 | 0.191843771 | 0.134825274 | 0.02001417  | 0.055630288 | 0.054918516 | 0.093320357 | 0.133236264 | 0.092002647 | 0.281147956 |
| 0.00939984  | 0.048336573 | 0.093876745 | 0.037794242 | 0.036506305 | 0.056176161 | 0.256250707 | 0.048183903 | 0.054762033 | 0.04802724  | 0.113701639 |
| 0.001185278 | 0.013297079 | 0.077123124 | 0.020685434 | 0.01260561  | 0.017399696 | 0.025134189 | 0.08727907  | 0.024560147 | 0.060684574 | 0.011427495 |
| 0.000608584 | 0.012804153 | 0.060261622 | 0.002873591 | 0.003284503 | 0.000958527 | 0.047742228 | 0.008239243 | 0.001212805 | 0.0031411   | 0.048825815 |
| 0.000587324 | 0.017073529 | 0.011699302 | 0.005147391 | 0.000151529 | 0.02051572  | 0.000955895 | 0.013703206 | 0.018708954 | 0.002148587 | 0.010391653 |
| 0           | 0.004521802 | 0.020827834 | 0.009023913 | 0           | 0.025548797 | 0.000353661 | 0.019517687 | 0.056268749 | 8.55E-05    | 0.013194519 |
| 0.000209948 | 0.002094936 | 0.008221876 | 0.001288077 | 0.041433059 | 0.000113724 | 0.008499992 | 0.007775322 | 0.001807384 | 0.024898332 | 0.006095957 |
| 0.036347643 | 0.102713479 | 0.106496476 | 0.077648424 | 0.018552116 | 0.046340703 | 0.055595525 | 0.044862226 | 0.077031702 | 0.116737419 | 0.003099216 |
| 0.000417239 | 0.01756248  | 0.013230288 | 0.018534542 | 0.145931025 | 0.061995555 | 0           | 7.01E-05    | 0.028090457 | 0.014709272 | 0.032473917 |
| 0.005243394 | 0.008425459 | 0.007117822 | 0.018625494 | 0.01002961  | 0.030406415 | 0.001782452 | 0.001185577 | 0.014776628 | 0.003672671 | 0.005932548 |
| 0           | 9.14E-05    | 0           | 8.11E-05    | 0.00015972  | 0.000367164 | 0.000210176 | 0.000457736 | 0           | 0           | 0.033196791 |
| 0           | 0.002653453 | 0.000915837 | 0.001580598 | 0.002346658 | 0.001231463 | 0.078326839 | 0.005608294 | 0.001408746 | 8.55E-05    | 0.016213417 |
| 0           | 0.008558628 | 0.001732975 | 0.004262453 | 0.000679835 | 0.002323209 | 0.06794335  | 0.008783578 | 0.00124321  | 0.001081728 | 0.010139617 |
| 0           | 0.009252303 | 0.001817902 | 0.002148434 | 0.00252276  | 0.001926801 | 0.005359481 | 0.000113403 | 0.002047242 | 0.000364293 | 0.009533068 |
| 0.000159454 | 0.013471989 | 0.008811776 | 0.008783013 | 0.002117317 | 0.014572855 | 0.002827268 | 0.000612376 | 0.004675549 | 0.007014505 | 0.010660308 |
| 0.00151216  | 0.044631677 | 0.013466707 | 0.033372008 | 0.031956327 | 0.061537412 | 0.017879084 | 0.020231095 | 0.013448961 | 0.010962255 | 0.025981903 |
| 0.000855739 | 0.048775834 | 0.009032128 | 0.01098061  | 0.015509241 | 0.020899131 | 0.004593552 | 0.016610446 | 0.004678928 | 0.000193298 | 0.020414946 |
| 0           | 0.030080419 | 0.002130067 | 0.016307447 | 0.004975899 | 6.17E-05    | 0.005056343 | 0.000136084 | 0.001331045 | 0           | 0.004356629 |
| 0           | 0.011699045 | 0.001854628 | 0.003367682 | 0.006425667 | 0.002563653 | 0.001701615 | 0.000709284 | 0.000412151 | 0.000111518 | 0.000484685 |
| 0.003903977 | 0.027512432 | 0.016466705 | 0.02444888  | 0.00157263  | 0.008545509 | 0.00190977  | 0.003053633 | 0.007557228 | 0.011742883 | 0.030230516 |
| 0.001158702 | 0.003788376 | 0.002407802 | 0.003202985 | 0.000880509 | 0.00287558  | 0.000765929 | 0.000284538 | 0.002361423 | 0.001914399 | 0.010225476 |
| 0           | 0.000123232 | 7.12E-05    | 0.000199111 | 0.000290773 | 0           | 0.000218259 | 0.001305165 | 0.000844572 | 0.000156126 | 7.20E-05    |
| 0           | 0.001804746 | 0.002593724 | 0.005707852 | 0.00047097  | 0.002069768 | 0.006260812 | 0.014635172 | 0.003912056 | 0.000643089 | 0.021409243 |
| 0           | 0.000484976 | 9.87E-05    | 0.001025054 | 0           | 9.42E-05    | 0.000470874 | 0.001148463 | 0.00027702  | 0           | 0.002428966 |
| 0           | 0.002128725 | 0.000100995 | 7.87E-05    | 0           | 0           | 0           | 0.000486602 | 0           | 0           | 0           |
| 0           | 0.000218637 | 0           | 0.000437553 | 0           | 0           | 0           | 0           | 0           | 0           | 0.000484685 |
| 0           | 0.000345843 | 8.26E-05    | 8.60E-05    | 0           | 0.000695338 | 0.00059213  | 0.00012165  | 0           | 0.000349424 | 0           |
| 0           | 0           | 0           | 0           | 0           | 0           | 0           | 0           | 0           | 0           | 0           |
| 0.000209948 | 0.010514432 | 0.014540922 | 0.01110106  | 0.012065018 | 0.013364136 | 0.078662312 | 0.039705482 | 0.003570849 | 0.00595508  | 0.011427495 |
| 0.011773054 | 0.126461387 | 0.080655638 | 0.083850367 | 0.161157685 | 0.187361095 | 0.17101434  | 0.362528763 | 0.054610011 | 0.137487268 | 0.088140719 |
| 0.001538735 | 0.015091887 | 0.009002288 | 0.030938428 | 0.036858508 | 0.02128904  | 0.021231792 | 0.045385941 | 0.03725575  | 0.022738594 | 0.010219936 |
| 0.00019666  | 0.000153046 | 8.95E-05    | 0.000833317 | 0.000176102 | 0.000500383 | 0           | 0           | 0.000114862 | 0.000795498 | 0.001024763 |
| 0           | 0.000238513 | 0           | 0.000589959 | 0.000274391 | 0           | 0.000141464 | 0.000175259 | 0.000746601 | 0.000327121 | 0.000304659 |
| 0           | 0           | 0           | 0           | 0.000905081 | 0           | 0           | 0           | 0           | 0.000237906 | 0.000252036 |
| 0           | 0           | 8.03E-05    | 0.000233525 | 0.00031125  | 0           | 0           | 0           | 0.000108105 | 0.000683979 | 8.03E-05    |
| 0           | 5.57E-05    | 0.000174445 | 0.000317103 | 0.000585641 | 0           | 0           | 6.60E-05    | 0           | 0.000338272 | 0           |
| 0.000411924 | 3.78E-05    | 0           | 0.001027512 | 0.000634785 | 0           | 0           | 0           | 0.000831059 | 0.000992513 | 6.92E-05    |
| 0           | 0.000107331 | 0.000376434 | 0.001199583 | 0.00636014  | 0           | 0           | 6.80E-05    | 0.003830978 | 0.006490369 | 0.00029635  |
| 0           | 0           | 0.00010329  | 0.000326936 | 0.000753552 | 0           | 0           | 0           | 0.000297289 | 0.00058733  | 7.75E-05    |
| 0.000201976 | 0.000109318 | 0           | 0.000149948 | 0           | 0           | 0           | 0           | 0.00013851  | 8.92E-05    | 0           |
| 0.000159454 | 3.18E-05    | 0.000105585 | 0.000872648 | 0.002633336 | 0           | 0           | 0           | 0.001662117 | 0.001293613 | 0           |
| 0.0055437   | 0.006302696 | 0.026701586 | 0.010884742 | 0.01050877  | 0.007967144 | 0.014857808 | 0.003090747 | 0.040492149 | 0.058212584 | 0.005838381 |
| 0.031529461 | 0.215605484 | 0.136282987 | 0.302867692 | 0.249212661 | 0.108846389 | 0.022935428 | 0.038977641 | 0.219510959 | 0.269703436 | 0.108167917 |
| 0.04914652  | 0.011518173 | 0.026540913 | 0.035505693 | 0.088759384 | 0.049479471 | 0.013792783 | 0.013416605 | 0.048076403 | 0.039696819 | 0.007303515 |
| 0.018725268 | 0.027699267 | 0.034689338 | 0.035722011 | 0.024445382 | 0.018666901 | 0.009411427 | 0.008424812 | 0.082798438 | 0.023147494 | 0.02997571  |
| 0.010494761 | 0.013861559 | 0.012560052 | 0.01306759  | 0.020182081 | 0.006141069 | 0.003180929 | 0.005412416 | 0.008344369 | 0.015422989 | 0.008364284 |

| H138        | H139        | H140        | H141        | H142        | H143        | H146        | H147        | H149        | H150        |
|-------------|-------------|-------------|-------------|-------------|-------------|-------------|-------------|-------------|-------------|
| 0.003064451 | 0.006883527 | 0.02050287  | 0.005942857 | 0.006657114 | 0.001438197 | 0.000413012 | 0.000474    | 0.003780169 | 0.000814359 |
| 0.000195982 | 0.00035336  | 0.000773769 | 0.000208318 | 0           | 0           | 0           | 0           | 0.000251493 | 0.000193751 |
| 6.83E-05    | 5.99E-05    | 4.41E-05    | 0           | 0.000156819 | 0           | 0.00351155  | 0.000117198 | 7.26E-05    | 0           |
| 5.94E-05    | 5.59E-05    | 3.81E-05    | 0           | 0           | 7.94E-05    | 0.002116446 | 0           | 5.96E-05    | 0           |
| 0           | 0           | 3.01E-05    | 0           | 0           | 0           | 0.000631889 | 0           | 0           | 0           |
| 0           | 3.99E-05    | 5.61E-05    | 0.000130199 | 0.000922464 | 0.000176842 | 0.003977853 | 0           | 6.48E-05    | 0.000108985 |
| 0           | 0           | 0           | 6.94E-05    | 0.000255215 | 0           | 0.001206679 | 0           | 0           | 0           |
| 7.13E-05    | 0           | 0           | 0           | 8.61E-05    | 0           | 0.001473138 | 9.90E-05    | 0           | 0           |
| 0           | 0           | 0           | 0           | 0           | 6.50E-05    | 0.00070802  | 0           | 0           | 0           |
| 0.006930649 | 0.025441899 | 0.009453611 | 0.066375407 | 0.016773467 | 0.006467376 | 0.00033688  | 0.003851904 | 0.002769013 | 0.000432912 |
| 0.000971004 | 0           | 0.007663519 | 0.00235226  | 0.000221391 | 0.000537745 | 0           | 0.001062594 | 0.000684475 | 0.000357228 |
| 0.001725239 | 3.39E-05    | 0.004510311 | 0.029190597 | 0.001460568 | 0.000660452 | 0.000159875 | 0.000549528 | 0.001882307 | 8.48E-05    |
| 0.044847297 | 0.010445074 | 0.019909513 | 0.091448825 | 0.123723925 | 0.108813965 | 0.309307606 | 0.300721939 | 0.092134499 | 0.114748987 |
| 0.115917628 | 0.238831238 | 0.30631223  | 0.106323327 | 0.127828889 | 0.048582916 | 0.009740983 | 0.102253845 | 0.233691214 | 0.072777692 |
| 0.003013971 | 0.013729123 | 0.023848518 | 0.091625316 | 0.013458747 | 0.01807942  | 0.243661605 | 0.015178427 | 0.002678268 | 0.051519582 |
| 0.000679999 | 0           | 0.050126589 | 0.002658951 | 0           | 0.015349191 | 0.002558007 | 0.010331644 | 0.002149356 | 0.001313873 |
| 0.000617641 | 0.00025953  | 0.007483106 | 0.000283544 | 0           | 0.027466499 | 0.036723771 | 0.00674018  | 0.003917583 | 0.015839138 |
| 0.00052262  | 3.99E-05    | 0.001878294 | 0.000248825 | 0           | 0.001757596 | 0.020513543 | 0.004148805 | 0.000246307 | 0.007268687 |
| 0.011364008 | 0           | 6.82E-05    | 0.006923689 | 6.46E-05    | 0.000290527 | 0.023370365 | 0.00166421  | 0.002522706 | 0.028266444 |
| 0.051567117 | 0.055782921 | 0.021445023 | 0.074939602 | 0.131408049 | 0.062964888 | 0.01323921  | 0.068037274 | 0.015504399 | 0.158424684 |
| 0.066304396 | 0.000515067 | 0.000298683 | 0.004435443 | 0.0006365   | 0.008248431 | 0.000896444 | 0.001388144 | 0.001195239 | 0.023132044 |
| 0.023814826 | 3.19E-05    | 0.004229669 | 0.004319711 | 0.001088507 | 0.008317002 | 0.001684402 | 0.030877734 | 0.001174497 | 0.005903349 |
| 0.000100961 | 2.79E-05    | 0.000543242 | 0.000167812 | 0           | 0.0007597   | 4.19E-05    | 0           | 0.000155563 | 0           |
| 0.006731697 | 0.011493174 | 0.022850236 | 0.003992767 | 0.00674936  | 0.003742561 | 5.71E-05    | 0.008610137 | 0.050026316 | 0           |
| 0.000148471 | 0.01979014  | 0.008194733 | 0.001466908 | 7.69E-05    | 0.006923918 | 0           | 0.000554737 | 0.001783784 | 0           |
| 0.000733449 | 0.001353547 | 0.009798399 | 0.001895118 | 0.00012607  | 0.003100154 | 3.62E-05    | 0.000617242 | 0.003157919 | 0.000578225 |
| 0.000852226 | 0.003020527 | 0.01308391  | 0.000497649 | 0.006438798 | 0.00415399  | 0.000717536 | 0.013535053 | 0.010062303 | 0.001044439 |
| 0.015423218 | 0.023223918 | 0.052375731 | 0.022605425 | 0.039435329 | 0.142294908 | 0.025393551 | 0.03495622  | 0.046386153 | 0.012478771 |
| 0.004976764 | 0.006719824 | 0.083360562 | 0.003787342 | 0.004932107 | 0.018474609 | 0.047410684 | 0.052666121 | 0.020256834 | 0.001507624 |
| 0           | 0.01222984  | 0.036457341 | 0           | 0.001482092 | 0.207690475 | 0           | 0.009276863 | 0           | 0.000611526 |
| 0.001027423 | 0.000179674 | 0.005825317 | 0.000112839 | 0.000276739 | 0.000729023 | 4.38E-05    | 0.006919884 | 0.002826053 | 0.00048135  |
| 0.003055543 | 0.001421424 | 0.005117699 | 0.00915443  | 0.029029937 | 0.015809342 | 0.013149756 | 0.038013782 | 0.017568195 | 0.007238414 |
| 0.001030392 | 0.00018766  | 0.000304697 | 0.00157396  | 0.00623893  | 0.004518502 | 0.002950083 | 0.000354198 | 0.001260056 | 0.002043467 |
| 0.000427598 | 0           | 3.01E-05    | 0.000332731 | 0.001894126 | 0           | 0.001433169 | 0.000104176 | 0.000982637 | 0           |
| 0.000448384 | 0.00564577  | 0.013759454 | 0.000992405 | 0.010897373 | 0.000389775 | 0.054801117 | 0.029955777 | 0.017614863 | 0.002415832 |
| 0.000136594 | 0.00072868  | 0.001000287 | 0           | 0.000931688 | 0.000221955 | 0.00503227  | 0.002857024 | 0.002017127 | 0.000293654 |
| 0           | 0.000193649 | 4.41E-05    | 0           | 0           | 0.000176842 | 0.001583528 | 0.000205747 | 0.000165933 | 0.000178614 |
| 0           | 0           | 0           | 0           | 6.46E-05    | 0           | 0           | 0.000992275 | 0.000147784 | 0.00021797  |
| 0.000190044 | 0.000644832 | 0.002207045 | 0.000494756 | 0.000412034 | 0.000149775 | 0           | 0           | 0.000311125 | 0           |
| 0           | 0           | 0           | 0           | 0           | 0           | 0           | 0           | 0           | 0           |
| 0.006212047 | 0.031455004 | 0.025265758 | 0.009177577 | 0.029826331 | 0.008721213 | 0.000797474 | 0.005823432 | 0.016710008 | 0.007217222 |
| 0.076691461 | 0.248895002 | 0.131634917 | 0.140889693 | 0.153082874 | 0.114711115 | 0.031672468 | 0.067659637 | 0.334192384 | 0.154228765 |
| 0.007405758 | 0.05984556  | 0.042124296 | 0.036342857 | 0.01927027  | 0.013586182 | 0.004644001 | 0.009110182 | 0.051498975 | 0.017679772 |
| 8.91E-05    | 0           | 0           | 0.000222785 | 0.003265522 | 0.000685715 | 4.00E-05    | 0           | 0           | 0.000348146 |
| 0.000288035 | 0           | 0.000683563 | 0.000196745 | 0.000725672 | 0.000420452 | 0           | 0.000205747 | 0.000521134 | 0           |
| 9.50E-05    | 0           | 0           | 6.08E-05    | 0.000531954 | 0.000160602 | 0           | 0           | 7.52E-05    | 7.87E-05    |
| 0.0005731   | 2.99E-05    | 0           | 7.81E-05    | 0.000553478 | 0.00014797  | 0           | 0.000213561 | 0.000303347 | 0.001026274 |
| 0.000864104 | 0.000175682 | 0           | 0.000338517 | 0.00075642  | 0           | 0           | 0.000218769 | 0.000420019 | 0.001861825 |
| 0.000424628 | 0.000692745 | 0           | 0.000850633 | 0.001878751 | 0.000140752 | 0           | 0.000125011 | 8.04E-05    | 0.0006418   |
| 0.001000698 | 0.002609272 | 0.00024055  | 0.002621338 | 0.004169537 | 0.001661957 | 0           | 0.000104176 | 0.001285984 | 0.002558118 |
| 0.000216768 | 0.000427226 | 0           | 0.000509222 | 0.000387435 | 0.000232782 | 0           | 0.000182308 | 0.000466688 | 0.000163477 |
| 0.000181135 | 0.000255537 | 0           | 8.10E-05    | 0.000350536 | 0           | 0           | 0.000104176 | 0           | 0           |
| 0.001342182 | 0.000411255 | 0           | 0.000708861 | 0.002032495 | 0.000526918 | 0           | 0           | 0           | 0.000675101 |
| 0.020209939 | 0.005943231 | 0.002700173 | 0.009290416 | 0.005138124 | 0.002028273 | 0.015378496 | 0.001976738 | 0.001389692 | 0.016780647 |
| 0.373904652 | 0.163569612 | 0.038920973 | 0.220730561 | 0.152200384 | 0.111683142 | 0.043453766 | 0.104058693 | 0.042320785 | 0.220512774 |
| 0.039647826 | 0.032578967 | 0.006569017 | 0.004493309 | 0.04552359  | 0.009888734 | 0.034449353 | 0.027861842 | 0.002691232 | 0.022553819 |
| 0.039950707 | 0.008833993 | 0.01358706  | 0.025322242 | 0.036083711 | 0.013569941 | 0.036065237 | 0.029148414 | 0.006551775 | 0.023552847 |
| 0.063884311 | 0.004913097 | 0.004648627 | 0.013534901 | 0.010494564 | 0.003403312 | 0.004617355 | 0.006091685 | 0.0019912   | 0.019844333 |

| Supplementary table S15. The average abundance and composition at the genus level among CC (n=73), SC (n=36), CCR (n=21), and SCR (n=36) groups. |              |             |             |             |
|--------------------------------------------------------------------------------------------------------------------------------------------------|--------------|-------------|-------------|-------------|
| ID                                                                                                                                               | CC           | CCR         | SC          | SCR         |
| Neisseria                                                                                                                                        | 0.136249452  | 0.160233571 | 0.130470778 | 0.246335167 |
| Streptococcus                                                                                                                                    | 0.159705603  | 0.251200905 | 0.146383083 | 0.123529778 |
| Prevotella                                                                                                                                       | 0.166776082  | 0.07783519  | 0.181512167 | 0.060714889 |
| Leptotrichia                                                                                                                                     | 0.108344603  | 0.041513952 | 0.128609167 | 0.11427075  |
| Veillonella                                                                                                                                      | 0.121021068  | 0.073762952 | 0.069739194 | 0.083846417 |
| Fusobacterium                                                                                                                                    | 0.032644233  | 0.043462333 | 0.030828806 | 0.092341722 |
| Actinomyces                                                                                                                                      | 0.056314959  | 0.010758286 | 0.019348111 | 0.025303139 |
| Haemophilus                                                                                                                                      | 0.014298795  | 0.087767857 | 0.025520889 | 0.033963306 |
| Rothia                                                                                                                                           | 0.028824973  | 0.034228905 | 0.026738944 | 0.023417278 |
| Gemella                                                                                                                                          | 0.028267534  | 0.055736762 | 0.018227583 | 0.013151722 |
| Capnocytophaga                                                                                                                                   | 0.011803219  | 0.013759571 | 0.033944972 | 0.050026333 |
| Porphyromonas                                                                                                                                    | 0.020620329  | 0.01876719  | 0.028219139 | 0.020680611 |
| Lautropia                                                                                                                                        | 0.006420123  | 0.055555857 | 0.009379361 | 0.009456583 |
| Lachnoanaerobaculum                                                                                                                              | 0.008327904  | 0.004973571 | 0.015894944 | 0.012829167 |
| Granulicatella                                                                                                                                   | 0.010795466  | 0.01603819  | 0.009509333 | 0.0054925   |
| Halomonas                                                                                                                                        | 0.009500288  | 1.10E-06    | 0.019204222 | 9.32E-04    |
| TM7x                                                                                                                                             | 0.0066080795 | 0.001291952 | 0.011654389 | 0.009183167 |
| Alloprevotella                                                                                                                                   | 0.003266753  | 0.007131381 | 0.00890425  | 0.003633778 |
| Oribacterium                                                                                                                                     | 0.003749041  | 0.002798381 | 0.005777333 | 0.005591222 |
| Selenomonas                                                                                                                                      | 0.003756658  | 0.00183181  | 0.004333417 | 0.007308528 |
| Campylobacter                                                                                                                                    | 0.00541737   | 0.00297019  | 0.003730111 | 0.003004778 |
| Peptostreptococcus                                                                                                                               | 0.003485548  | 0.001266286 | 0.009508056 | 0.001657111 |
| Stomatobaculum                                                                                                                                   | 0.003828384  | 0.001293524 | 0.002299111 | 0.004806167 |
| Solobacterium                                                                                                                                    | 0.002532795  | 0.001141143 | 0.006853056 | 0.002663889 |
| Clostridia_UCG-014                                                                                                                               | 0.001860247  | 5.86E-04    | 0.004100944 | 0.006697639 |
| [Eubacterium]_nodatum_group                                                                                                                      | 0.002024288  | 0.001024    | 0.005887167 | 0.003889167 |
| Abiotrophia                                                                                                                                      | 0.002960726  | 0.004241714 | 5.96E-04    | 4.19E-04    |
| Tannerella                                                                                                                                       | 0.001443342  | 0.001834762 | 0.003487611 | 0.001505806 |
| Atopobium                                                                                                                                        | 0.002377932  | 4.12E-04    | 0.002557083 | 0.001101333 |
| Kingella                                                                                                                                         | 0.003456767  | 4.35E-04    | 1.79E-04    | 4.05E-04    |
| Lachnospiraceae_uncultured                                                                                                                       | 0.001227863  | 3.90E-04    | 0.002392889 | 0.002633306 |
| Corynebacterium                                                                                                                                  | 0.001853384  | 0.001750952 | 0.00158125  | 0.0012985   |
| Megasphaera                                                                                                                                      | 0.002227562  | 0.00107819  | 0.001672861 | 7.98E-04    |
| P5D1-392                                                                                                                                         | 0.002359836  | 5.74E-04    | 0.001024    | 0.001254    |
| Eikenella                                                                                                                                        | 0.002108466  | 0.001233905 | 0.001603917 | 7.28E-04    |
| Lactobacillales_unclassified                                                                                                                     | 0.001405493  | 0.002098857 | 5.92E-04    | 0.001889889 |
| Treponema                                                                                                                                        | 9.04E-04     | 0.00130619  | 0.002304333 | 4.65E-04    |
| Absconditabacteriales_(SR1)                                                                                                                      | 4.25E-04     | 3.31E-04    | 0.001406694 | 0.002564361 |
| Actinobacillus                                                                                                                                   | 0.001007822  | 0.001742048 | 6.98E-04    | 8.30E-04    |
| F0332                                                                                                                                            | 0.001428507  | 3.97E-04    | 5.97E-04    | 7.03E-04    |
| Johnsonella                                                                                                                                      | 9.37E-04     | 6.50E-04    | 0.001269528 | 8.08E-04    |
| Enterococcus                                                                                                                                     | 9.62E-04     | 4.80E-04    | 5.39E-04    | 0.001273556 |
| Actinobacteria_unclassified                                                                                                                      | 0.001424027  | 1.33E-04    | 5.98E-04    | 4.43E-04    |
| Selenomonadaceae_unclassified                                                                                                                    | 4.28E-04     | 9.97E-04    | 6.81E-04    | 0.001837278 |
| Bergeyella                                                                                                                                       | 4.57E-04     | 0.001396048 | 0.001283444 | 5.47E-04    |
| Dialister                                                                                                                                        | 5.92E-04     | 9.78E-04    | 9.64E-04    | 6.20E-04    |
| Saccharimonadaceae                                                                                                                               | 6.07E-04     | 6.47E-04    | 8.00E-04    | 9.27E-04    |
| Catonella                                                                                                                                        | 5.78E-04     | 5.27E-04    | 5.74E-04    | 8.32E-04    |
| Pelagibacterium                                                                                                                                  | 6.48E-04     | 0           | 0.001350639 | 9.54E-05    |
| Others                                                                                                                                           | 0.012263041  | 0.009433429 | 0.014670361 | 0.011294667 |



| Supplementary table S17. The abundance and composition at the genus and phylum level of each sample among CC (n=73), CCR (n=21), and H (n=140) groups. |        |       |            |            |          |          |          |               |
|--------------------------------------------------------------------------------------------------------------------------------------------------------|--------|-------|------------|------------|----------|----------|----------|---------------|
| sample                                                                                                                                                 | reads  | label | ace        | chao       | shannon  | simpson  | coverage | observed_otus |
| CC01                                                                                                                                                   | 7455   | 0.97  | 135.60751  | 147.5      | 2.524982 | 0.160715 | 0.995842 | 101           |
| CC02                                                                                                                                                   | 44451  | 0.97  | 262.705094 | 237.066667 | 2.849096 | 0.099143 | 0.998943 | 165           |
| CC03                                                                                                                                                   | 48453  | 0.97  | 230.534961 | 224.12     | 2.341045 | 0.195993 | 0.999113 | 188           |
| CC04                                                                                                                                                   | 34734  | 0.97  | 192.784377 | 206.928571 | 2.769604 | 0.107754 | 0.998877 | 154           |
| CC05                                                                                                                                                   | 31376  | 0.97  | 126.917698 | 133.142857 | 2.582905 | 0.13304  | 0.999363 | 106           |
| CC06                                                                                                                                                   | 54380  | 0.97  | 173.429311 | 170.235294 | 3.030465 | 0.07619  | 0.999559 | 154           |
| CC07                                                                                                                                                   | 25172  | 0.97  | 159.025722 | 154.3125   | 2.248837 | 0.264487 | 0.998967 | 134           |
| CC08                                                                                                                                                   | 36229  | 0.97  | 189.742831 | 159.583333 | 2.179127 | 0.173118 | 0.999034 | 110           |
| CC09                                                                                                                                                   | 29623  | 0.97  | 241.632744 | 228        | 3.156719 | 0.078491 | 0.99865  | 168           |
| CC10                                                                                                                                                   | 35071  | 0.97  | 279.369174 | 284.913043 | 3.429069 | 0.064269 | 0.998489 | 225           |
| CC11                                                                                                                                                   | 27951  | 0.97  | 219.865902 | 190.833333 | 2.489673 | 0.156193 | 0.998497 | 143           |
| CC12                                                                                                                                                   | 47479  | 0.97  | 272.713558 | 212.4      | 1.342442 | 0.467968 | 0.998863 | 117           |
| CC13                                                                                                                                                   | 19591  | 0.97  | 291.682994 | 243        | 2.391576 | 0.220811 | 0.997091 | 167           |
| CC15                                                                                                                                                   | 22672  | 0.97  | 170.483962 | 110        | 2.506587 | 0.107933 | 0.998941 | 64            |
| CC16                                                                                                                                                   | 65473  | 0.97  | 393.698474 | 408.428571 | 2.477593 | 0.185261 | 0.998839 | 327           |
| CC17                                                                                                                                                   | 45610  | 0.97  | 485.689225 | 490.022727 | 3.884058 | 0.042297 | 0.998268 | 420           |
| CC18                                                                                                                                                   | 113725 | 0.97  | 344.156927 | 358.272727 | 3.34938  | 0.075944 | 0.999578 | 307           |
| CC19                                                                                                                                                   | 12117  | 0.97  | 91.09363   | 93.333333  | 1.046064 | 0.627054 | 0.998267 | 70            |
| CC20                                                                                                                                                   | 52561  | 0.97  | 367.71902  | 316.12     | 2.557275 | 0.221046 | 0.998706 | 225           |
| CC21                                                                                                                                                   | 42544  | 0.97  | 230.357516 | 264.545455 | 3.22275  | 0.073994 | 0.999036 | 190           |
| CC22                                                                                                                                                   | 8304   | 0.97  | 180.691225 | 184.153846 | 3.443264 | 0.064305 | 0.995906 | 141           |
| CC23                                                                                                                                                   | 16827  | 0.97  | 188.339727 | 179.391304 | 2.434734 | 0.181119 | 0.997979 | 155           |
| CC24                                                                                                                                                   | 53682  | 0.97  | 293.157864 | 293.12     | 3.201019 | 0.105425 | 0.999106 | 248           |
| CC25                                                                                                                                                   | 8343   | 0.97  | 226.184666 | 218.636364 | 3.438151 | 0.064971 | 0.995206 | 195           |
| CC26                                                                                                                                                   | 26851  | 0.97  | 351.888658 | 294.888889 | 2.118671 | 0.351655 | 0.997505 | 213           |
| CC27                                                                                                                                                   | 48813  | 0.97  | 319.578239 | 323.555556 | 3.007876 | 0.166827 | 0.998996 | 280           |
| CC28                                                                                                                                                   | 16935  | 0.97  | 252.227901 | 250.913043 | 2.779329 | 0.157222 | 0.99687  | 191           |
| CC29                                                                                                                                                   | 55341  | 0.97  | 320.326541 | 323.565217 | 3.415581 | 0.070506 | 0.999006 | 259           |
| CC30                                                                                                                                                   | 25987  | 0.97  | 254.25051  | 250.037037 | 3.444605 | 0.059912 | 0.998653 | 228           |
| CC31                                                                                                                                                   | 17336  | 0.97  | 208.825152 | 210.047619 | 1.939938 | 0.398615 | 0.997635 | 171           |
| CC32                                                                                                                                                   | 13496  | 0.97  | 160.405892 | 159.142857 | 1.893053 | 0.331    | 0.997703 | 137           |
| CC33                                                                                                                                                   | 16698  | 0.97  | 215.627705 | 227.555556 | 2.338563 | 0.235778 | 0.997365 | 175           |
| CC34                                                                                                                                                   | 43841  | 0.97  | 317.79303  | 335.045455 | 3.870457 | 0.035621 | 0.998768 | 270           |
| CC35                                                                                                                                                   | 11676  | 0.97  | 153.739469 | 140.5      | 1.504863 | 0.449136 | 0.997345 | 94            |
| CC36                                                                                                                                                   | 64763  | 0.97  | 433.069073 | 424.136364 | 3.449841 | 0.064589 | 0.998688 | 343           |
| CC37                                                                                                                                                   | 14751  | 0.97  | 252.833517 | 254.12     | 3.516755 | 0.069812 | 0.997424 | 226           |
| CC38                                                                                                                                                   | 13135  | 0.97  | 213.887626 | 153.928571 | 1.874375 | 0.237637 | 0.997031 | 101           |
| CC39                                                                                                                                                   | 32572  | 0.97  | 236.159432 | 237.384615 | 1.888748 | 0.342543 | 0.998649 | 201           |
| CC40                                                                                                                                                   | 60581  | 0.97  | 240.274848 | 195.625    | 2.983687 | 0.120696 | 0.999389 | 154           |
| CC41                                                                                                                                                   | 8255   | 0.97  | 229.280817 | 275        | 2.934521 | 0.124152 | 0.993701 | 173           |
| CC42                                                                                                                                                   | 14069  | 0.97  | 139.187242 | 120.8125   | 2.401164 | 0.152428 | 0.998365 | 105           |
| CC43                                                                                                                                                   | 76210  | 0.97  | 286.901436 | 280.228571 | 2.655941 | 0.105055 | 0.999239 | 233           |
| CC44                                                                                                                                                   | 18457  | 0.97  | 281.515044 | 290.136364 | 3.525344 | 0.068021 | 0.997454 | 241           |
| CC45                                                                                                                                                   | 23573  | 0.97  | 320.827186 | 332.291667 | 3.166044 | 0.159358 | 0.997497 | 261           |
| CC46                                                                                                                                                   | 9778   | 0.97  | 222.136276 | 214.6      | 2.806427 | 0.147233 | 0.995398 | 175           |
| CC47                                                                                                                                                   | 10638  | 0.97  | 196.432455 | 160.588235 | 1.758022 | 0.338065 | 0.996334 | 117           |
| CC48                                                                                                                                                   | 49094  | 0.97  | 177.55053  | 168.136364 | 2.511787 | 0.111266 | 0.999144 | 129           |
| CC49                                                                                                                                                   | 17850  | 0.97  | 159.539941 | 162.083333 | 2.823122 | 0.13279  | 0.998543 | 135           |
| CC50                                                                                                                                                   | 13881  | 0.97  | 153.605144 | 122.1      | 1.538265 | 0.435624 | 0.998055 | 87            |
| CC51                                                                                                                                                   | 41266  | 0.97  | 254.650167 | 243.636364 | 2.15015  | 0.259824 | 0.998764 | 205           |
| CC52                                                                                                                                                   | 47153  | 0.97  | 406.803677 | 405.071429 | 3.724811 | 0.050097 | 0.998855 | 371           |
| CC53                                                                                                                                                   | 47576  | 0.97  | 281.571556 | 252.352941 | 2.606173 | 0.182189 | 0.998991 | 186           |
| CC54                                                                                                                                                   | 20934  | 0.97  | 239.768947 | 221.285714 | 3.458245 | 0.059758 | 0.998089 | 199           |
| CC55                                                                                                                                                   | 43493  | 0.97  | 168.930915 | 181.545455 | 2.875555 | 0.081591 | 0.999149 | 121           |
| CC56                                                                                                                                                   | 24012  | 0.97  | 212.62985  | 192.4      | 3.097301 | 0.079944 | 0.998459 | 148           |
| CC57                                                                                                                                                   | 37653  | 0.97  | 419.009505 | 421.162791 | 3.641364 | 0.07791  | 0.998141 | 365           |
| CC58                                                                                                                                                   | 19236  | 0.97  | 257.302617 | 276.588235 | 3.052715 | 0.123426 | 0.997557 | 213           |
| CC59                                                                                                                                                   | 51820  | 0.97  | 268.64596  | 261.9375   | 2.981119 | 0.096204 | 0.999132 | 231           |
| CC60                                                                                                                                                   | 18762  | 0.97  | 231.801474 | 230.37037  | 2.577832 | 0.254973 | 0.997815 | 200           |
| CC61                                                                                                                                                   | 51264  | 0.97  | 223.914345 | 212.033333 | 2.846164 | 0.09038  | 0.999083 | 176           |
| CC62                                                                                                                                                   | 26361  | 0.97  | 218.952315 | 229.176471 | 2.506215 | 0.178341 | 0.998596 | 190           |
| CC63                                                                                                                                                   | 34039  | 0.97  | 244.58363  | 237        | 2.759314 | 0.154714 | 0.998825 | 211           |
| CC64                                                                                                                                                   | 84521  | 0.97  | 275.776983 | 226.4      | 0.581201 | 0.813159 | 0.999349 | 167           |
| CC65                                                                                                                                                   | 42728  | 0.97  | 212.460136 | 206.125    | 1.856474 | 0.424501 | 0.999298 | 188           |
| CC66                                                                                                                                                   | 40352  | 0.97  | 318.535695 | 322        | 3.219454 | 0.087534 | 0.998587 | 265           |
| CC67                                                                                                                                                   | 30156  | 0.97  | 262.215203 | 265.416667 | 2.434043 | 0.307891 | 0.998541 | 226           |
| CC68                                                                                                                                                   | 15742  | 0.97  | 219.654111 | 230.166667 | 2.740964 | 0.147758 | 0.997268 | 180           |
| CC69                                                                                                                                                   | 30088  | 0.97  | 240.153872 | 226.551724 | 2.711422 | 0.134943 | 0.998704 | 201           |
| CC70                                                                                                                                                   | 48825  | 0.97  | 264.104153 | 244.066667 | 2.665516 | 0.207362 | 0.999099 | 181           |
| CC71                                                                                                                                                   | 65325  | 0.97  | 207.556352 | 209        | 2.92801  | 0.100844 | 0.999388 | 170           |
| CC72                                                                                                                                                   | 35789  | 0.97  | 283.972383 | 298.333333 | 3.498472 | 0.062326 | 0.998603 | 240           |
| CC73                                                                                                                                                   | 35906  | 0.97  | 220.871743 | 213.444444 | 2.273064 | 0.238135 | 0.998914 | 186           |
| CC74                                                                                                                                                   | 73418  | 0.97  | 171.978905 | 210.2      | 2.954036 | 0.120552 | 0.999673 | 155           |
| CCR01                                                                                                                                                  | 29347  | 0.97  | 242.408423 | 214.615385 | 2.042788 | 0.287016 | 0.998433 | 135           |
| CCR02                                                                                                                                                  | 53990  | 0.97  | 256.463849 | 262.05     | 2.826484 | 0.176516 | 0.999222 | 219           |
| CCR03                                                                                                                                                  | 37171  | 0.97  | 239.358152 | 242.285714 | 2.833193 | 0.124602 | 0.998951 | 207           |
| CCR04                                                                                                                                                  | 46893  | 0.97  | 210.537994 | 208.052632 | 1.974443 | 0.327864 | 0.999147 | 167           |

|       |       |      |            |            |          |          |          |     |  |
|-------|-------|------|------------|------------|----------|----------|----------|-----|--|
| CCR05 | 31132 | 0.97 | 195.878343 | 189.954545 | 2.836536 | 0.096284 | 0.998779 | 158 |  |
| CCR06 | 62391 | 0.97 | 332.027847 | 260.111111 | 2.583695 | 0.12158  | 0.999199 | 124 |  |
| CCR07 | 47454 | 0.97 | 343.939355 | 348.1      | 2.895174 | 0.172941 | 0.998672 | 283 |  |
| CCR08 | 35288 | 0.97 | 264.229914 | 277.714286 | 2.564633 | 0.140767 | 0.998356 | 199 |  |
| CCR09 | 38515 | 0.97 | 316.188522 | 333        | 3.444766 | 0.068906 | 0.998546 | 263 |  |
| CCR10 | 64350 | 0.97 | 413.614322 | 440.5      | 3.167235 | 0.094896 | 0.998834 | 348 |  |
| CCR11 | 53746 | 0.97 | 257.181805 | 220.136364 | 2.182154 | 0.275678 | 0.999126 | 171 |  |
| CCR12 | 37745 | 0.97 | 185.496661 | 193.4      | 1.590581 | 0.417404 | 0.99902  | 149 |  |
| CCR13 | 31776 | 0.97 | 254.07519  | 255.222222 | 1.528765 | 0.51749  | 0.998395 | 208 |  |
| CCR14 | 42768 | 0.97 | 304.161014 | 267.037037 | 2.663863 | 0.123885 | 0.998691 | 210 |  |
| CCR15 | 19234 | 0.97 | 267.691687 | 267.333333 | 3.475638 | 0.070988 | 0.997608 | 229 |  |
| CCR16 | 39196 | 0.97 | 348.695886 | 344.153846 | 2.961384 | 0.139521 | 0.99824  | 284 |  |
| CCR17 | 44983 | 0.97 | 217.601384 | 219.647059 | 3.037988 | 0.090594 | 0.999066 | 169 |  |
| CCR18 | 28749 | 0.97 | 207.76317  | 198.681818 | 2.624575 | 0.191633 | 0.998643 | 165 |  |
| CCR19 | 34880 | 0.97 | 131.911836 | 160.5      | 1.801049 | 0.38268  | 0.999226 | 102 |  |
| CCR20 | 36077 | 0.97 | 186.889821 | 187.4      | 3.263439 | 0.075462 | 0.99939  | 172 |  |
| CCR21 | 34311 | 0.97 | 229.925978 | 193.045455 | 3.416478 | 0.055769 | 0.99898  | 166 |  |
| H002  | 44182 | 0.97 | 418.713582 | 416        | 3.699402 | 0.057874 | 0.998302 | 341 |  |
| H003  | 25256 | 0.97 | 344.93561  | 339.341463 | 3.676188 | 0.052229 | 0.997941 | 307 |  |
| H004  | 46291 | 0.97 | 380.907425 | 328.129032 | 3.083469 | 0.085105 | 0.998401 | 241 |  |
| H005  | 46124 | 0.97 | 355.862397 | 372.555556 | 3.494152 | 0.058567 | 0.998352 | 267 |  |
| H006  | 33928 | 0.97 | 459.301265 | 467        | 3.801187 | 0.059782 | 0.997613 | 386 |  |
| H008  | 50924 | 0.97 | 403.437828 | 360.222222 | 3.417499 | 0.053912 | 0.998468 | 249 |  |
| H009  | 40078 | 0.97 | 415.33181  | 422.410256 | 3.914814 | 0.046382 | 0.998303 | 364 |  |
| H010  | 33172 | 0.97 | 408.102806 | 407.317073 | 3.882001 | 0.043362 | 0.998252 | 367 |  |
| H011  | 32252 | 0.97 | 446.003816 | 444.466667 | 4.143309 | 0.03684  | 0.998233 | 409 |  |
| H013  | 23478 | 0.97 | 311.297407 | 321.25     | 3.302177 | 0.089915 | 0.997402 | 245 |  |
| H014  | 23771 | 0.97 | 254.276271 | 250        | 3.393336 | 0.059212 | 0.997897 | 201 |  |
| H015  | 39861 | 0.97 | 359.0122   | 340.055556 | 3.526607 | 0.058624 | 0.99852  | 245 |  |
| H016  | 30321 | 0.97 | 303.889821 | 294.034483 | 3.34806  | 0.074098 | 0.99812  | 239 |  |
| H017  | 29082 | 0.97 | 345.604009 | 359.357143 | 2.65418  | 0.250202 | 0.997902 | 294 |  |
| H018  | 29803 | 0.97 | 437.816144 | 369.651163 | 3.594266 | 0.052852 | 0.997349 | 298 |  |
| H019  | 47629 | 0.97 | 372.110459 | 317.7      | 3.488568 | 0.051559 | 0.998593 | 244 |  |
| H020  | 52408 | 0.97 | 379.99379  | 375.8      | 3.649874 | 0.053269 | 0.998779 | 331 |  |
| H021  | 44461 | 0.97 | 440.36     | 437.5      | 4.1995   | 0.031625 | 0.998695 | 394 |  |
| H023  | 27682 | 0.97 | 354.837116 | 347        | 3.805607 | 0.040967 | 0.997544 | 280 |  |
| H024  | 23929 | 0.97 | 440.03621  | 483.730769 | 3.361027 | 0.145198 | 0.996866 | 377 |  |
| H025  | 49918 | 0.97 | 608.646258 | 621.721311 | 3.896896 | 0.044358 | 0.997836 | 527 |  |
| H026  | 41157 | 0.97 | 535.015471 | 527.227273 | 3.864113 | 0.052862 | 0.997716 | 461 |  |
| H027  | 26320 | 0.97 | 521.340715 | 528.72549  | 3.933518 | 0.062305 | 0.996847 | 462 |  |
| H028  | 25712 | 0.97 | 419.290298 | 455.107143 | 4.129717 | 0.031324 | 0.997083 | 356 |  |
| H029  | 33946 | 0.97 | 589.231541 | 593.982759 | 4.438287 | 0.026878 | 0.997201 | 517 |  |
| H030  | 46722 | 0.97 | 604.197416 | 621.170213 | 4.375987 | 0.02844  | 0.998202 | 547 |  |
| H031  | 45772 | 0.97 | 566.718484 | 563.171875 | 3.949698 | 0.062979 | 0.998187 | 510 |  |
| H032  | 36906 | 0.97 | 541.295006 | 547.733333 | 4.623533 | 0.020207 | 0.997887 | 481 |  |
| H033  | 23635 | 0.97 | 436.716891 | 439.219512 | 4.15068  | 0.042533 | 0.997081 | 382 |  |
| H034  | 33433 | 0.97 | 488.732193 | 526.78125  | 4.245549 | 0.030613 | 0.997547 | 423 |  |
| H035  | 50620 | 0.97 | 440.124318 | 431.978261 | 3.700649 | 0.042183 | 0.99836  | 358 |  |
| H036  | 17126 | 0.97 | 289.936559 | 271.875    | 3.446191 | 0.076332 | 0.996672 | 222 |  |
| H038  | 34885 | 0.97 | 324.079608 | 364.55     | 3.624085 | 0.047539 | 0.998223 | 270 |  |
| H039  | 38270 | 0.97 | 374.102781 | 364.923077 | 3.652344 | 0.049028 | 0.998171 | 303 |  |
| H040  | 27833 | 0.97 | 322.34474  | 325        | 3.979503 | 0.031803 | 0.998096 | 272 |  |
| H041  | 33245 | 0.97 | 269.247097 | 293.5      | 3.36575  | 0.057955 | 0.998376 | 214 |  |
| H042  | 39412 | 0.97 | 361.941103 | 375.6      | 3.300093 | 0.081121 | 0.998148 | 288 |  |
| H043  | 43817 | 0.97 | 327.286194 | 337.24     | 3.603384 | 0.051772 | 0.998768 | 280 |  |
| H044  | 36188 | 0.97 | 467.471787 | 407.833333 | 3.384362 | 0.063624 | 0.99743  | 289 |  |
| H045  | 31363 | 0.97 | 403.314173 | 399.317073 | 3.853847 | 0.046701 | 0.997896 | 347 |  |
| H046  | 29779 | 0.97 | 286.630971 | 285.333333 | 3.061827 | 0.09883  | 0.998119 | 234 |  |
| H047  | 26875 | 0.97 | 436.087169 | 427.32     | 3.603722 | 0.05671  | 0.996688 | 349 |  |
| H048  | 34909 | 0.97 | 367.017797 | 371.028571 | 3.40195  | 0.072673 | 0.998023 | 304 |  |
| H049  | 41981 | 0.97 | 380.680808 | 383.30303  | 3.658843 | 0.052274 | 0.998309 | 308 |  |
| H050  | 45510 | 0.97 | 452.463188 | 402.162162 | 4.000684 | 0.033242 | 0.99844  | 335 |  |
| H051  | 56479 | 0.97 | 500.790249 | 508        | 3.949736 | 0.041336 | 0.998495 | 423 |  |
| H052  | 44502 | 0.97 | 381.799751 | 394.617647 | 3.019068 | 0.115406 | 0.998315 | 313 |  |
| H053  | 8717  | 0.97 | 309.071271 | 333.391304 | 4.037103 | 0.04129  | 0.993232 | 259 |  |
| H054  | 13490 | 0.97 | 435.493728 | 444.371429 | 4.808713 | 0.017356 | 0.996071 | 405 |  |
| H055  | 13119 | 0.97 | 341.252439 | 358.391304 | 4.274174 | 0.029492 | 0.995655 | 289 |  |
| H056  | 34856 | 0.97 | 375.301595 | 378.029412 | 3.614478 | 0.052626 | 0.997992 | 307 |  |
| H057  | 40713 | 0.97 | 341.246128 | 342.033333 | 3.526476 | 0.067303 | 0.998477 | 279 |  |
| H058  | 10079 | 0.97 | 368.960441 | 389        | 4.544121 | 0.023236 | 0.994543 | 334 |  |
| H059  | 12286 | 0.97 | 311.855268 | 319.84     | 4.235218 | 0.029548 | 0.996419 | 282 |  |
| H060  | 29501 | 0.97 | 412.014169 | 422.2      | 4.061236 | 0.042815 | 0.998339 | 383 |  |
| H061  | 23259 | 0.97 | 309.824581 | 303.228571 | 3.299347 | 0.084408 | 0.997506 | 256 |  |
| H062  | 44382 | 0.97 | 452.620483 | 462.363636 | 4.074878 | 0.041091 | 0.998783 | 419 |  |
| H063  | 45742 | 0.97 | 348.872636 | 363.888889 | 3.077113 | 0.143506 | 0.998492 | 277 |  |
| H064  | 38339 | 0.97 | 372.879052 | 385.517241 | 3.112837 | 0.106887 | 0.997861 | 271 |  |
| H065  | 52089 | 0.97 | 406.936363 | 411.692308 | 3.723511 | 0.048696 | 0.998771 | 360 |  |
| H066  | 26537 | 0.97 | 396.480704 | 408.333333 | 3.949891 | 0.070075 | 0.998267 | 370 |  |
| H067  | 27830 | 0.97 | 311.578069 | 306.848485 | 3.2147   | 0.088234 | 0.99788  | 255 |  |
| H068  | 37090 | 0.97 | 392.968978 | 403        | 2.897433 | 0.173494 | 0.997924 | 326 |  |

|      |       |      |            |            |          |          |          |     |  |
|------|-------|------|------------|------------|----------|----------|----------|-----|--|
| H069 | 26283 | 0.97 | 335.18539  | 354.4      | 3.394113 | 0.09502  | 0.997299 | 255 |  |
| H070 | 26930 | 0.97 | 330.702946 | 336.964286 | 3.310997 | 0.082436 | 0.997512 | 258 |  |
| H071 | 30209 | 0.97 | 435.281303 | 439.217391 | 3.904785 | 0.035978 | 0.997087 | 356 |  |
| H072 | 27873 | 0.97 | 335.971978 | 338.09375  | 3.813318 | 0.05264  | 0.997776 | 279 |  |
| H073 | 36445 | 0.97 | 396.376678 | 405.176471 | 3.840216 | 0.04214  | 0.998216 | 344 |  |
| H074 | 31459 | 0.97 | 299.519552 | 290.033333 | 2.976409 | 0.123787 | 0.998029 | 227 |  |
| H075 | 37042 | 0.97 | 372.245968 | 371.692308 | 3.362193 | 0.072541 | 0.998272 | 320 |  |
| H076 | 40083 | 0.97 | 436.305733 | 394.896552 | 3.587233 | 0.070594 | 0.998079 | 294 |  |
| H077 | 23011 | 0.97 | 327.685492 | 329.275862 | 2.850233 | 0.17234  | 0.996958 | 246 |  |
| H078 | 25401 | 0.97 | 344.552404 | 352.1      | 3.876766 | 0.039019 | 0.99752  | 287 |  |
| H079 | 27934 | 0.97 | 301.748806 | 297.103448 | 3.631062 | 0.047899 | 0.997995 | 244 |  |
| H080 | 26245 | 0.97 | 433.002275 | 380.4375   | 3.643722 | 0.048642 | 0.997066 | 289 |  |
| H081 | 25087 | 0.97 | 355.890843 | 342.5      | 3.369157 | 0.065979 | 0.99721  | 290 |  |
| H082 | 42683 | 0.97 | 374.295249 | 363.384615 | 3.696568 | 0.053222 | 0.99829  | 296 |  |
| H083 | 44640 | 0.97 | 413.798886 | 421.026316 | 3.500399 | 0.067822 | 0.99832  | 348 |  |
| H084 | 40666 | 0.97 | 388.42068  | 402.30303  | 3.222985 | 0.095712 | 0.998254 | 327 |  |
| H085 | 35737 | 0.97 | 333.606929 | 332.115385 | 3.977446 | 0.033302 | 0.998461 | 275 |  |
| H086 | 35797 | 0.97 | 361.596272 | 367.3125   | 3.62004  | 0.068939 | 0.998324 | 312 |  |
| H087 | 44050 | 0.97 | 353.819877 | 327.444444 | 3.090671 | 0.092125 | 0.998502 | 248 |  |
| H088 | 39983 | 0.97 | 380.43709  | 383.529412 | 3.611452 | 0.068028 | 0.998674 | 343 |  |
| H089 | 26372 | 0.97 | 350.855618 | 383.181818 | 3.622669 | 0.065463 | 0.997687 | 300 |  |
| H090 | 21110 | 0.97 | 274.730713 | 275.035714 | 3.533686 | 0.052846 | 0.997395 | 222 |  |
| H091 | 27107 | 0.97 | 416.520579 | 417.153846 | 4.217094 | 0.030342 | 0.997455 | 357 |  |
| H092 | 24318 | 0.97 | 363.401907 | 391.576923 | 3.847173 | 0.042134 | 0.99708  | 296 |  |
| H093 | 31004 | 0.97 | 321.177874 | 320.125    | 3.393301 | 0.07095  | 0.998194 | 272 |  |
| H094 | 29782 | 0.97 | 330.540243 | 360.954545 | 3.729384 | 0.044471 | 0.997918 | 275 |  |
| H095 | 33111 | 0.97 | 482.116611 | 438.096774 | 3.781852 | 0.042573 | 0.997252 | 306 |  |
| H096 | 39006 | 0.97 | 417.023146 | 413.341463 | 3.541915 | 0.065407 | 0.998154 | 351 |  |
| H097 | 23754 | 0.97 | 314.857581 | 318.033333 | 3.393218 | 0.095713 | 0.99739  | 255 |  |
| H098 | 50077 | 0.97 | 311.686119 | 314.677419 | 3.698655 | 0.038649 | 0.998882 | 265 |  |
| H099 | 39062 | 0.97 | 409.710969 | 415.30303  | 3.995593 | 0.047114 | 0.998413 | 358 |  |
| H100 | 38412 | 0.97 | 324.288815 | 322.193548 | 3.544484 | 0.047589 | 0.998282 | 253 |  |
| H101 | 44812 | 0.97 | 348.522539 | 348.09375  | 2.965165 | 0.131932 | 0.998505 | 279 |  |
| H102 | 25711 | 0.97 | 295.877713 | 299.038462 | 3.479141 | 0.071852 | 0.998016 | 250 |  |
| H103 | 27776 | 0.97 | 356.687732 | 340.166667 | 3.718208 | 0.063718 | 0.99784  | 291 |  |
| H104 | 37727 | 0.97 | 398.270171 | 398        | 3.796227 | 0.044463 | 0.998622 | 364 |  |
| H105 | 32470 | 0.97 | 416.428974 | 421.363636 | 4.064943 | 0.038265 | 0.998337 | 378 |  |
| H106 | 47327 | 0.97 | 445.156106 | 450.078947 | 3.857419 | 0.045856 | 0.998331 | 369 |  |
| H107 | 38798 | 0.97 | 415.287262 | 416.277778 | 4.062118 | 0.03387  | 0.998634 | 378 |  |
| H108 | 33537 | 0.97 | 360.303661 | 360.756757 | 3.555296 | 0.061401 | 0.998002 | 301 |  |
| H109 | 43593 | 0.97 | 378.783995 | 389.65625  | 3.453687 | 0.069093 | 0.998371 | 312 |  |
| H110 | 40098 | 0.97 | 446.003021 | 433.5625   | 3.948802 | 0.042391 | 0.998055 | 371 |  |
| H111 | 41856 | 0.97 | 356.16014  | 376.464286 | 3.288216 | 0.077505 | 0.998232 | 280 |  |
| H112 | 34330 | 0.97 | 342.403207 | 358.615385 | 3.787234 | 0.043023 | 0.998019 | 271 |  |
| H113 | 42796 | 0.97 | 403.283634 | 404.692308 | 4.042916 | 0.036855 | 0.998738 | 368 |  |
| H114 | 65401 | 0.97 | 367.055333 | 373        | 3.60635  | 0.047148 | 0.998991 | 308 |  |
| H115 | 22659 | 0.97 | 297.482063 | 260.625    | 3.549059 | 0.044281 | 0.997617 | 201 |  |
| H116 | 54448 | 0.97 | 375.614415 | 398.137931 | 3.751188 | 0.042729 | 0.998678 | 310 |  |
| H117 | 31384 | 0.97 | 320.087352 | 313.46875  | 3.410102 | 0.074112 | 0.99812  | 260 |  |
| H118 | 35534 | 0.97 | 383.348805 | 388.076923 | 3.686999 | 0.048241 | 0.998227 | 338 |  |
| H119 | 44373 | 0.97 | 487.126723 | 482.584906 | 3.701022 | 0.061269 | 0.998039 | 412 |  |
| H120 | 34403 | 0.97 | 392.992824 | 409.941176 | 3.276819 | 0.092451 | 0.997675 | 317 |  |
| H121 | 41867 | 0.97 | 455.626037 | 443.564516 | 3.118505 | 0.141777 | 0.998041 | 390 |  |
| H122 | 47318 | 0.97 | 442.626868 | 426.195652 | 3.312569 | 0.106497 | 0.998267 | 354 |  |
| H123 | 37402 | 0.97 | 441.756604 | 445.878049 | 3.72312  | 0.0508   | 0.997567 | 346 |  |
| H124 | 38914 | 0.97 | 512.228729 | 476.371429 | 3.876637 | 0.047911 | 0.997739 | 367 |  |
| H125 | 13782 | 0.97 | 385.463424 | 402.833333 | 4.247319 | 0.028965 | 0.994848 | 320 |  |
| H126 | 41427 | 0.97 | 421.65208  | 425.085714 | 4.163017 | 0.033719 | 0.998359 | 360 |  |
| H127 | 24349 | 0.97 | 503.061366 | 378.371429 | 3.828937 | 0.037888 | 0.996386 | 269 |  |
| H129 | 30574 | 0.97 | 505.670366 | 519.022727 | 4.163402 | 0.033715 | 0.996795 | 411 |  |
| H130 | 26281 | 0.97 | 337.650793 | 326.717391 | 3.630579 | 0.056549 | 0.998059 | 299 |  |
| H131 | 49287 | 0.97 | 407.459406 | 400.5      | 4.044654 | 0.042099 | 0.998864 | 362 |  |
| H132 | 26742 | 0.97 | 343.335515 | 336.625    | 3.459161 | 0.071901 | 0.997532 | 283 |  |
| H133 | 33174 | 0.97 | 357.812443 | 380.2      | 3.505306 | 0.070095 | 0.99792  | 302 |  |
| H135 | 24873 | 0.97 | 269.392266 | 267.37037  | 3.823605 | 0.041312 | 0.998352 | 237 |  |
| H136 | 33568 | 0.97 | 293.956548 | 312.9      | 3.730852 | 0.040577 | 0.998421 | 244 |  |
| H137 | 35792 | 0.97 | 358.688789 | 395.5      | 3.356914 | 0.101934 | 0.997988 | 289 |  |
| H138 | 45762 | 0.97 | 375.290961 | 403.777778 | 3.551026 | 0.057076 | 0.998361 | 301 |  |
| H139 | 51560 | 0.97 | 319.685464 | 355.333333 | 3.396349 | 0.064285 | 0.998836 | 257 |  |
| H140 | 52568 | 0.97 | 348.279894 | 369        | 3.910153 | 0.048043 | 0.999144 | 314 |  |
| H141 | 51274 | 0.97 | 367.745858 | 368.027778 | 3.976094 | 0.029779 | 0.999025 | 334 |  |
| H142 | 41740 | 0.97 | 346.22718  | 359.4      | 3.90542  | 0.04003  | 0.998682 | 300 |  |
| H143 | 24063 | 0.97 | 351.814822 | 338.466667 | 3.841079 | 0.043106 | 0.997631 | 303 |  |
| H146 | 41051 | 0.97 | 384.941864 | 353.12     | 3.313343 | 0.073508 | 0.998222 | 248 |  |
| H147 | 22931 | 0.97 | 309.349023 | 299.026316 | 3.070559 | 0.141815 | 0.997427 | 254 |  |
| H149 | 31417 | 0.97 | 371.937193 | 384.483871 | 3.122366 | 0.109518 | 0.997836 | 311 |  |
| H150 | 32212 | 0.97 | 287.434271 | 285.677419 | 3.439678 | 0.066554 | 0.998262 | 236 |  |













| CC65     | CC23     | CC07     | CC47     | CC31     | CC73     | CC32     | CC50     | CC35     | CC19     | ID...75      | CCR12    | CCR13    |
|----------|----------|----------|----------|----------|----------|----------|----------|----------|----------|--------------|----------|----------|
| 0.095362 | 0.074038 | 0.071974 | 0.069915 | 0.066801 | 0.061818 | 0.04317  | 0.023426 | 0.021146 | 0.014768 | Firmicutes   | 0.901118 | 0.812541 |
| 0.035886 | 0.326473 | 0.017214 | 0.333713 | 0.147885 | 0.043574 | 0.107462 | 0.864062 | 0.873214 | 0.921853 | Bacteroidota | 0.033812 | 0.029645 |
| 0.784173 | 0.504283 | 0.087471 | 0.006377 | 0.003399 | 0.780261 | 0.794214 | 0.001428 | 0.002372 | 0.00989  | Proteobacter | 0.028655 | 0.105148 |
| 0.066081 | 0.071604 | 0.601499 | 0.56602  | 0.760612 | 0.096746 | 0.049641 | 7.82E-04 | 0.001554 | 0.051388 | Fusobacteri  | 0.023543 | 0.036187 |
| 0.013706 | 0.022696 | 0.220511 | 0.022633 | 0.018071 | 0.010474 | 0.003378 | 0.108966 | 0.09973  | 0.001001 | Actinobacte  | 0.008779 | 0.010791 |
| 0.004264 | 1.18E-04 | 0.001004 | 7.46E-04 | 9.97E-04 | 0.001829 | 0.001162 | 7.09E-04 | 4.25E-04 | 0        | Patescibacte | 5.44E-04 | 0.00248  |
| 2.02E-04 | 3.59E-04 | 1.55E-04 | 4.96E-04 | 9.27E-04 | 0.005156 | 1.47E-04 | 2.73E-04 | 5.32E-04 | 0.0011   | Campilobac   | 0.003294 | 0.001892 |
| 0        | 0        | 0        | 0        | 1.49E-04 | 5.00E-05 | 0        | 0        | 0        | 0        | Spirochaeto  | 1.93E-04 | 4.82E-04 |
| 3.26E-04 | 4.29E-04 | 1.72E-04 | 1.00E-04 | 0.001159 | 9.20E-05 | 7.48E-04 | 3.54E-04 | 0.001027 | 0        | Bacteria_un  | 6.20E-05 | 0        |
| 0        | 0        | 0        | 0        | 0        | 0        | 0        | 0        | 0        | 0        | Synergistota | 0        | 6.32E-04 |
| 0        | 0        | 0        | 0        | 0        | 0        | 0        | 0        | 0        | 0        | Desulfobact  | 0        | 1.44E-04 |
| 0        | 0        | 0        | 0        | 0        | 0        | 7.80E-05 | 0        | 0        | 0        | Cyanobacter  | 0        | 0        |
| 0        | 0        | 0        | 0        | 0        | 0        | 0        | 0        | 0        | 0        | Deferribacte | 0        | 0        |
| 0        | 0        | 0        | 0        | 0        | 0        | 0        | 0        | 0        | 0        | Verrucomici  | 0        | 0        |
| 0        | 0        | 0        | 0        | 0        | 0        | 0        | 0        | 0        | 0        | Deinococcol  | 0        | 0        |
| 0        | 0        | 0        | 0        | 0        | 0        | 0        | 0        | 0        | 0        | Chloroflexi  | 0        | 2.90E-05 |
| 0        | 0        | 0        | 0        | 0        | 0        | 0        | 0        | 0        | 0        | Elusimicrobi | 0        | 2.90E-05 |
| 0        | 0        | 0        | 0        | 0        | 0        | 0        | 0        | 0        | 0        | Planctomyce  | 0        | 0        |



| CCR16    | CCR04    | CCR01    | CCR08    | CCR17    | CCR19    | ID...97         | H045     | H139     | H031     | H085     | H125     | H066     |
|----------|----------|----------|----------|----------|----------|-----------------|----------|----------|----------|----------|----------|----------|
| 0.269345 | 0.268618 | 0.240891 | 0.238617 | 0.184453 | 0.073784 | Firmicutes      | 0.510898 | 0.47481  | 0.450832 | 0.431463 | 0.414038 | 0.392922 |
| 0.043757 | 0.039354 | 0.058491 | 0.025716 | 0.165874 | 0.898012 | Bacteroidota    | 0.20526  | 0.178282 | 0.223834 | 0.323963 | 0.436224 | 0.232286 |
| 0.544997 | 0.592733 | 0.661538 | 0.642682 | 0.522589 | 0.001368 | Proteobacteria  | 0.076185 | 0.188042 | 0.180078 | 0.0067   | 0.023857 | 0.223855 |
| 0.094233 | 0.080832 | 0.01814  | 0.028094 | 0.11512  | 0.009782 | Fusobacteri     | 0.098696 | 0.025917 | 0.071626 | 0.070652 | 0.070044 | 0.06236  |
| 0.037945 | 0.012041 | 0.019902 | 0.063104 | 0.001264 | 0.014009 | Actinobacteria  | 0.082598 | 0.10497  | 0.058952 | 0.142495 | 0.028126 | 0.065451 |
| 0.004252 | 0.003317 | 2.59E-04 | 2.67E-04 | 0.007407 | 1.40E-04 | Patescibacteria | 0.002028 | 0.018561 | 0.005936 | 0.008621 | 0.021976 | 0.004466 |
| 0.003106 | 0.002601 | 5.42E-04 | 7.52E-04 | 0.003238 | 0.00286  | Campilobacter   | 0.015319 | 0.004516 | 0.002703 | 0.011978 | 0.00222  | 0.006844 |
| 0.002042 | 1.97E-04 | 1.72E-04 | 1.33E-04 | 5.50E-05 | 2.20E-05 | Spirochaetota   | 0.005946 | 0.003351 | 0.004996 | 0.003922 | 0        | 0.009553 |
| 0        | 3.07E-04 | 3.00E-05 | 5.99E-04 | 0        | 0        | Bacteria_un     | 0        | 1.06E-04 | 0        | 0        | 0        | 0        |
| 1.13E-04 | 0        | 3.50E-05 | 3.60E-05 | 0        | 2.30E-05 | Synergistota    | 0.001485 | 0.001304 | 4.30E-05 | 2.06E-04 | 0        | 9.90E-04 |
| 1.90E-05 | 0        | 0        | 0        | 0        | 0        | Desulfobact     | 3.78E-04 | 1.03E-04 | 7.03E-04 | 0        | 0.001389 | 4.91E-04 |
| 1.91E-04 | 0        | 0        | 0        | 0        | 0        | Cyanobacteria   | 0.001207 | 3.80E-05 | 1.33E-04 | 0        | 6.50E-04 | 7.40E-05 |
| 0        | 0        | 0        | 0        | 0        | 0        | Deferribacteria | 0        | 0        | 1.41E-04 | 0        | 2.04E-04 | 0        |
| 0        | 0        | 0        | 0        | 0        | 0        | Verrucomicro    | 0        | 0        | 2.30E-05 | 0        | 0.001272 | 1.39E-04 |
| 0        | 0        | 0        | 0        | 0        | 0        | Deinococcos     | 0        | 0        | 0        | 0        | 0        | 4.26E-04 |
| 0        | 0        | 0        | 0        | 0        | 0        | Chloroflexi     | 0        | 0        | 0        | 0        | 0        | 1.43E-04 |
| 0        | 0        | 0        | 0        | 0        | 0        | Elusimicrobi    | 0        | 0        | 0        | 0        | 0        | 0        |
| 0        | 0        | 0        | 0        | 0        | 0        | Planctomyces    | 0        | 0        | 0        | 0        | 0        | 0        |























| H077     | H074     | H087     | H004     |
|----------|----------|----------|----------|
| 0.08319  | 0.073136 | 0.069366 | 0.049219 |
| 0.245328 | 0.322669 | 0.253435 | 0.220714 |
| 0.535264 | 0.38164  | 0.540408 | 0.582023 |
| 0.10091  | 0.177868 | 0.066348 | 0.078461 |
| 0.01913  | 0.010237 | 0.021856 | 0.031781 |
| 0.009936 | 0.023028 | 0.041019 | 0.033072 |
| 0.005514 | 0.009467 | 0.006765 | 0.003876 |
| 5.06E-04 | 0.001766 | 5.42E-04 | 7.44E-04 |
| 1.20E-04 | 0        | 0        | 0        |
| 5.30E-05 | 1.89E-04 | 1.75E-04 | 8.10E-05 |
| 4.90E-05 | 0        | 6.30E-05 | 0        |
| 0        | 0        | 2.30E-05 | 0        |
| 0        | 0        | 0        | 0        |
| 0        | 0        | 0        | 0        |
| 0        | 0        | 0        | 0        |
| 0        | 0        | 0        | 0        |
| 0        | 0        | 0        | 0        |
| 0        | 0        | 0        | 2.90E-05 |
| 0        | 0        | 0        | 0        |













| CC65     | CC23     | CC07     | CC47     | CC31     | CC73     | CC32     | CC50     | CC35     | CC19     | ID...75      | CCR12    | CCR13    |
|----------|----------|----------|----------|----------|----------|----------|----------|----------|----------|--------------|----------|----------|
| 0.095362 | 0.074038 | 0.071974 | 0.069915 | 0.066801 | 0.061818 | 0.04317  | 0.023426 | 0.021146 | 0.014768 | Firmicutes   | 0.901118 | 0.812541 |
| 0.035886 | 0.326473 | 0.017214 | 0.333713 | 0.147885 | 0.043574 | 0.107462 | 0.864062 | 0.873214 | 0.921853 | Bacteroidota | 0.033812 | 0.029645 |
| 0.784173 | 0.504283 | 0.087471 | 0.006377 | 0.003399 | 0.780261 | 0.794214 | 0.001428 | 0.002372 | 0.00989  | Proteobacter | 0.028655 | 0.105148 |
| 0.066081 | 0.071604 | 0.601499 | 0.56602  | 0.760612 | 0.096746 | 0.049641 | 7.82E-04 | 0.001554 | 0.051388 | Fusobacteri  | 0.023543 | 0.036187 |
| 0.013706 | 0.022696 | 0.220511 | 0.022633 | 0.018071 | 0.010474 | 0.003378 | 0.108966 | 0.09973  | 0.001001 | Actinobacte  | 0.008779 | 0.010791 |
| 0.004264 | 1.18E-04 | 0.001004 | 7.46E-04 | 9.97E-04 | 0.001829 | 0.001162 | 7.09E-04 | 4.25E-04 | 0        | Patescibacte | 5.44E-04 | 0.00248  |
| 2.02E-04 | 3.59E-04 | 1.55E-04 | 4.96E-04 | 9.27E-04 | 0.005156 | 1.47E-04 | 2.73E-04 | 5.32E-04 | 0.0011   | Campilobac   | 0.003294 | 0.001892 |
| 0        | 0        | 0        | 0        | 1.49E-04 | 5.00E-05 | 0        | 0        | 0        | 0        | Spirochaeto  | 1.93E-04 | 4.82E-04 |
| 3.26E-04 | 4.29E-04 | 1.72E-04 | 1.00E-04 | 0.001159 | 9.20E-05 | 7.48E-04 | 3.54E-04 | 0.001027 | 0        | Bacteria_un  | 6.20E-05 | 0        |
| 0        | 0        | 0        | 0        | 0        | 0        | 0        | 0        | 0        | 0        | Synergistota | 0        | 6.32E-04 |
| 0        | 0        | 0        | 0        | 0        | 0        | 0        | 0        | 0        | 0        | Desulfobact  | 0        | 1.44E-04 |
| 0        | 0        | 0        | 0        | 0        | 0        | 7.80E-05 | 0        | 0        | 0        | Cyanobacter  | 0        | 0        |
| 0        | 0        | 0        | 0        | 0        | 0        | 0        | 0        | 0        | 0        | Deferribacte | 0        | 0        |
| 0        | 0        | 0        | 0        | 0        | 0        | 0        | 0        | 0        | 0        | Verrucomici  | 0        | 0        |
| 0        | 0        | 0        | 0        | 0        | 0        | 0        | 0        | 0        | 0        | Deinococcol  | 0        | 0        |
| 0        | 0        | 0        | 0        | 0        | 0        | 0        | 0        | 0        | 0        | Chloroflexi  | 0        | 2.90E-05 |
| 0        | 0        | 0        | 0        | 0        | 0        | 0        | 0        | 0        | 0        | Elusimicrobi | 0        | 2.90E-05 |
| 0        | 0        | 0        | 0        | 0        | 0        | 0        | 0        | 0        | 0        | Planctomyce  | 0        | 0        |



| CCR16    | CCR04    | CCR01    | CCR08    | CCR17    | CCR19    | ID...97         | H045     | H139     | H031     | H085     | H125     | H066     |
|----------|----------|----------|----------|----------|----------|-----------------|----------|----------|----------|----------|----------|----------|
| 0.269345 | 0.268618 | 0.240891 | 0.238617 | 0.184453 | 0.073784 | Firmicutes      | 0.510898 | 0.47481  | 0.450832 | 0.431463 | 0.414038 | 0.392922 |
| 0.043757 | 0.039354 | 0.058491 | 0.025716 | 0.165874 | 0.898012 | Bacteroidota    | 0.20526  | 0.178282 | 0.223834 | 0.323963 | 0.436224 | 0.232286 |
| 0.544997 | 0.592733 | 0.661538 | 0.642682 | 0.522589 | 0.001368 | Proteobacteria  | 0.076185 | 0.188042 | 0.180078 | 0.0067   | 0.023857 | 0.223855 |
| 0.094233 | 0.080832 | 0.01814  | 0.028094 | 0.11512  | 0.009782 | Fusobacteri     | 0.098696 | 0.025917 | 0.071626 | 0.070652 | 0.070044 | 0.06236  |
| 0.037945 | 0.012041 | 0.019902 | 0.063104 | 0.001264 | 0.014009 | Actinobacteria  | 0.082598 | 0.10497  | 0.058952 | 0.142495 | 0.028126 | 0.065451 |
| 0.004252 | 0.003317 | 2.59E-04 | 2.67E-04 | 0.007407 | 1.40E-04 | Patescibacteria | 0.002028 | 0.018561 | 0.005936 | 0.008621 | 0.021976 | 0.004466 |
| 0.003106 | 0.002601 | 5.42E-04 | 7.52E-04 | 0.003238 | 0.00286  | Campilobacter   | 0.015319 | 0.004516 | 0.002703 | 0.011978 | 0.00222  | 0.006844 |
| 0.002042 | 1.97E-04 | 1.72E-04 | 1.33E-04 | 5.50E-05 | 2.20E-05 | Spirochaetota   | 0.005946 | 0.003351 | 0.004996 | 0.003922 | 0        | 0.009553 |
| 0        | 3.07E-04 | 3.00E-05 | 5.99E-04 | 0        | 0        | Bacteria_un     | 0        | 1.06E-04 | 0        | 0        | 0        | 0        |
| 1.13E-04 | 0        | 3.50E-05 | 3.60E-05 | 0        | 2.30E-05 | Synergistota    | 0.001485 | 0.001304 | 4.30E-05 | 2.06E-04 | 0        | 9.90E-04 |
| 1.90E-05 | 0        | 0        | 0        | 0        | 0        | Desulfobact     | 3.78E-04 | 1.03E-04 | 7.03E-04 | 0        | 0.001389 | 4.91E-04 |
| 1.91E-04 | 0        | 0        | 0        | 0        | 0        | Cyanobacteria   | 0.001207 | 3.80E-05 | 1.33E-04 | 0        | 6.50E-04 | 7.40E-05 |
| 0        | 0        | 0        | 0        | 0        | 0        | Deferribacteria | 0        | 0        | 1.41E-04 | 0        | 2.04E-04 | 0        |
| 0        | 0        | 0        | 0        | 0        | 0        | Verrucomicro    | 0        | 0        | 2.30E-05 | 0        | 0.001272 | 1.39E-04 |
| 0        | 0        | 0        | 0        | 0        | 0        | Deinococci      | 0        | 0        | 0        | 0        | 0        | 4.26E-04 |
| 0        | 0        | 0        | 0        | 0        | 0        | Chloroflexi     | 0        | 0        | 0        | 0        | 0        | 1.43E-04 |
| 0        | 0        | 0        | 0        | 0        | 0        | Elusimicrobi    | 0        | 0        | 0        | 0        | 0        | 0        |
| 0        | 0        | 0        | 0        | 0        | 0        | Planctomyces    | 0        | 0        | 0        | 0        | 0        | 0        |

























| H077     | H074     | H087     | H004     |
|----------|----------|----------|----------|
| 0.08319  | 0.073136 | 0.069366 | 0.049219 |
| 0.245328 | 0.322669 | 0.253435 | 0.220714 |
| 0.535264 | 0.38164  | 0.540408 | 0.582023 |
| 0.10091  | 0.177868 | 0.066348 | 0.078461 |
| 0.01913  | 0.010237 | 0.021856 | 0.031781 |
| 0.009936 | 0.023028 | 0.041019 | 0.033072 |
| 0.005514 | 0.009467 | 0.006765 | 0.003876 |
| 5.06E-04 | 0.001766 | 5.42E-04 | 7.44E-04 |
| 1.20E-04 | 0        | 0        | 0        |
| 5.30E-05 | 1.89E-04 | 1.75E-04 | 8.10E-05 |
| 4.90E-05 | 0        | 6.30E-05 | 0        |
| 0        | 0        | 2.30E-05 | 0        |
| 0        | 0        | 0        | 0        |
| 0        | 0        | 0        | 0        |
| 0        | 0        | 0        | 0        |
| 0        | 0        | 0        | 0        |
| 0        | 0        | 0        | 0        |
| 0        | 0        | 0        | 2.90E-05 |
| 0        | 0        | 0        | 0        |

Supplementary table S18. The different degree of microbiome at phylum level (p value)

| ID                    | CC.median                | CC.mean     | CC.se      | CCR.median               | CCR.mean    | CCR.se      | H.median                 |
|-----------------------|--------------------------|-------------|------------|--------------------------|-------------|-------------|--------------------------|
| Firmicutes            | 0.3515(0.1753,0.5063)    | 0.365673918 | 0.02756398 | 0.3779(0.2693,0.575)     | 0.426132524 | 0.04681201  | 0.2234(0.1687,0.2822)    |
| Bacteroidota          | 0.143(0.072,0.2902)      | 0.210188726 | 0.02414691 | 0.0755(0.0438,0.1024)    | 0.121292905 | 0.040224509 | 0.3231(0.2626,0.4007)    |
| Proteobacteria        | 0.0752(0.0092,0.2685)    | 0.172200027 | 0.02557727 | 0.2177(0.1333,0.5226)    | 0.31174619  | 0.046500481 | 0.2277(0.1322,0.343)     |
| Actinobacteriota      | 0.0513(0.023,0.1314)     | 0.095685616 | 0.01345615 | 0.0123(0.0088,0.0631)    | 0.048632857 | 0.019084152 | 0.0373(0.0242,0.0569)    |
| Patescibacteria       | 0.0018(0.0004,0.0076)    | 0.007782712 | 0.00189238 | 0.0025(0.0005,0.0043)    | 0.002588857 | 4.45E-04    | 0.023(0.0124,0.0333)     |
| Campilobacterota      | 0.0012(0.0005,0.0055)    | 0.005457247 | 0.00136071 | 0.0031(0.0015,0.0033)    | 0.00296181  | 4.56E-04    | 0.0083(0.0052,0.0128)    |
| Spirochaetota         | <0.0001(<0.0001,0.0004)  | 9.27E-04    | 2.93E-04   | 0.0002(<0.0001,0.002)    | 0.001292    | 3.88E-04    | 0.0014(0.0006,0.0038)    |
| Bacteria_unclassified | 0.0003(<0.0001,0.0008)   | 9.71E-04    | 2.48E-04   | <0.0001(<0.0001,0.0006)  | 4.32E-04    | 1.37E-04    | <0.0001(<0.0001,<0.0001) |
| Synergistota          | <0.0001(<0.0001,<0.0001) | 1.22E-04    | 5.68E-05   | <0.0001(<0.0001,0.0001)  | 8.94E-05    | 3.31E-05    | 0.0002(<0.0001,0.0005)   |
| Desulfobacterota      | <0.0001(<0.0001,<0.0001) | 1.72E-05    | 7.42E-06   | <0.0001(<0.0001,<0.0001) | 1.10E-05    | 7.15E-06    | <0.0001(<0.0001,0.0002)  |
| Cyanobacteria         | <0.0001(<0.0001,<0.0001) | 4.52E-04    | 2.07E-04   | <0.0001(<0.0001,<0.0001) | 1.57E-05    | 9.99E-06    | <0.0001(<0.0001,<0.0001) |
| Deferribacterota      | <0.0001(<0.0001,<0.0001) | 0           | 0          | <0.0001(<0.0001,<0.0001) | 0           | 0           | <0.0001(<0.0001,<0.0001) |
| Verrucomicrobiota     | <0.0001(<0.0001,<0.0001) | 5.79E-06    | 3.74E-06   | <0.0001(<0.0001,<0.0001) | 0           | 0           | <0.0001(<0.0001,<0.0001) |
| Chloroflexi           | <0.0001(<0.0001,<0.0001) | 1.27E-06    | 6.05E-07   | <0.0001(<0.0001,<0.0001) | 1.38E-06    | 1.38E-06    | <0.0001(<0.0001,<0.0001) |

| H.mean      | H.se        | p-value     | z-score      | Sig_mark | q-value     | fixp    | fixps      |
|-------------|-------------|-------------|--------------|----------|-------------|---------|------------|
| 0.229006643 | 0.007306092 | 3.34E-07    | -5.103127961 | ***      | 7.52E-07    | <0.0001 | ***<0.0001 |
| 0.32872055  | 0.007756981 | 2.75E-16    | -8.183831587 | ***      | 1.65E-15    | <0.0001 | ***<0.0001 |
| 0.252985871 | 0.013133376 | 6.72E-06    | -4.502221421 | ***      | 1.21E-05    | <0.0001 | ***<0.0001 |
| 0.044443079 | 0.00226418  | 0.002139944 | -3.070089809 | **       | 0.003501727 | 0.0021  | ** 0.0021  |
| 0.024120907 | 0.001340821 | 1.26E-22    | -9.788758034 | ***      | 2.26E-21    | <0.0001 | ***<0.0001 |
| 0.010312629 | 6.46E-04    | 5.89E-16    | -8.091625261 | ***      | 2.65E-15    | <0.0001 | ***<0.0001 |
| 0.002847714 | 3.61E-04    | 2.39E-14    | -7.627801931 | ***      | 8.60E-14    | <0.0001 | ***<0.0001 |
| 3.72E-05    | 6.84E-06    | 1.61E-18    | -8.781969435 | ***      | 1.45E-17    | <0.0001 | ***<0.0001 |
| 5.25E-04    | 9.56E-05    | 3.25E-12    | -6.966398291 | ***      | 8.36E-12    | <0.0001 | ***<0.0001 |
| 4.08E-04    | 8.87E-05    | 6.18E-14    | -7.504246404 | ***      | 1.85E-13    | <0.0001 | ***<0.0001 |
| 8.47E-05    | 1.55E-05    | 0.048473394 | -1.973194611 | *        | 0.063198454 | 0.0485  | * 0.0485   |
| 2.76E-04    | 1.97E-04    | 0.010089265 | -2.57275483  | *        | 0.015133898 | 0.0101  | * 0.0101   |
| 6.93E-05    | 1.94E-05    | 8.04E-07    | -4.934317601 | ***      | 1.61E-06    | <0.0001 | ***<0.0001 |
| 9.90E-06    | 2.78E-06    | 0.049154353 | -1.967250374 | *        | 0.063198454 | 0.0492  | * 0.0492   |

Supplementary table S18. The different degree of microbiome at genus level (p value)

| ID               | CC.median                | CC.mean     | CC.se       | CCR.median               | CCR.mean    | CCR.se      | H.median                 |
|------------------|--------------------------|-------------|-------------|--------------------------|-------------|-------------|--------------------------|
| Prevotella       | 0.0915(0.0271,0.2518)    | 0.170206603 | 0.024530362 | 0.037(0.0154,0.0568)     | 0.077687143 | 0.040876129 | 0.168(0.1013,0.2298)     |
| Neisseria        | 0.0286(0.0016,0.1622)    | 0.133397356 | 0.024161565 | 0.0852(0.0275,0.2505)    | 0.159918571 | 0.038031666 | 0.1318(0.065,0.2575)     |
| Streptococcus    | 0.062(0.0243,0.2253)     | 0.160325562 | 0.0233208   | 0.1887(0.0929,0.3843)    | 0.251226238 | 0.046170581 | 0.0504(0.0328,0.0829)    |
| Leptotrichia     | 0.0531(0.0191,0.1399)    | 0.109328507 | 0.017554713 | 0.0305(0.0113,0.0456)    | 0.04148281  | 0.010511254 | 0.0259(0.0142,0.0502)    |
| Fusobacterium    | 0.0074(0.0007,0.0301)    | 0.031138    | 0.008728899 | 0.0382(0.0169,0.0583)    | 0.043302667 | 0.007263825 | 0.0585(0.0364,0.0916)    |
| Haemophilus      | 0.0027(0.0003,0.0134)    | 0.014064164 | 0.003301992 | 0.0459(0.011,0.084)      | 0.087566762 | 0.028011533 | 0.0393(0.0204,0.0658)    |
| Alloprevotella   | 0.0008(0.0003,0.0019)    | 0.002536644 | 6.21E-04    | 0.0029(0.0012,0.0071)    | 0.007155143 | 0.002565415 | 0.056(0.0379,0.0871)     |
| Porphyromonas    | 0.0032(0.0007,0.0182)    | 0.022523726 | 0.006893269 | 0.0151(0.0044,0.0221)    | 0.018677333 | 0.004262576 | 0.0451(0.0202,0.0699)    |
| Actinomyces      | 0.0162(0.0047,0.0777)    | 0.056781384 | 0.010890556 | 0.0031(0.0001,0.0149)    | 0.01098981  | 0.003589627 | 0.0169(0.0101,0.0269)    |
| Gemella          | 0.0029(0.0002,0.0298)    | 0.028027603 | 0.007647034 | 0.0213(0.0074,0.059)     | 0.055719429 | 0.019967427 | 0.0047(0.002,0.0081)     |
| Capnocytophaga   | 0.0033(0.0004,0.0133)    | 0.011647562 | 0.002119185 | 0.0098(0.0057,0.0183)    | 0.01365181  | 0.002696136 | 0.0112(0.0044,0.0205)    |
| Lautropia        | 0.0002(<0.0001,0.0027)   | 0.006691342 | 0.002782466 | 0.028(0.005,0.1059)      | 0.056190857 | 0.014307819 | 0.0014(0.0004,0.003)     |
| Granulicatella   | 0.0032(0.0007,0.0116)    | 0.01078137  | 0.002441113 | 0.0124(0.0063,0.0188)    | 0.015977    | 0.003188544 | 0.0057(0.0037,0.009)     |
| Lachnoanaerobac  | 0.0034(0.0013,0.0091)    | 0.00842689  | 0.002056468 | 0.003(0.0014,0.0064)     | 0.005008143 | 0.001461537 | 0.0069(0.0043,0.0122)    |
| TM7x             | 0.001(0.0001,0.0037)     | 0.005583836 | 0.001534326 | 0.0009(0.0001,0.002)     | 0.001207476 | 2.63E-04    | 0.0075(0.0034,0.0143)    |
| Campylobacter    | 0.0012(0.0005,0.0055)    | 0.005456068 | 0.001360701 | 0.0031(0.0015,0.0033)    | 0.002960762 | 4.56E-04    | 0.0081(0.0051,0.0123)    |
| Moraxella        | <0.0001(<0.0001,<0.0001) | 1.63E-06    | 1.02E-06    | <0.0001(<0.0001,<0.0001) | 0           | 0           | <0.0001(<0.0001,<0.0001) |
| Actinobacillus   | <0.0001(<0.0001,<0.0001) | 0.001007603 | 6.33E-04    | <0.0001(<0.0001,<0.0001) | 0.001743619 | 0.001509281 | 0.0014(0.0002,0.005)     |
| g__Absconditaba  | <0.0001(<0.0001,0.0002)  | 4.42E-04    | 1.50E-04    | <0.0001(<0.0001,0.0005)  | 3.39E-04    | 1.74E-04    | 0.0046(0.0007,0.0114)    |
| Oribacterium     | 0.0014(0.0003,0.0046)    | 0.00374463  | 7.40E-04    | 0.0019(0.0004,0.0038)    | 0.002795952 | 7.21E-04    | 0.0041(0.0027,0.0059)    |
| Bacteroides      | <0.0001(<0.0001,<0.0001) | 6.63E-04    | 4.73E-04    | <0.0001(<0.0001,0.0001)  | 1.13E-04    | 4.45E-05    | 0.0005(0.0001,0.0023)    |
| Selenomonas      | 0.0017(0.0003,0.0044)    | 0.003793164 | 7.05E-04    | 0.0004(0.0001,0.0019)    | 0.001891619 | 6.54E-04    | 0.0019(0.0006,0.0048)    |
| Stomatobaculum   | 0.0009(0.0001,0.0025)    | 0.003882959 | 9.82E-04    | 0.0007(<0.0001,0.0014)   | 0.001262095 | 3.31E-04    | 0.0023(0.0009,0.0052)    |
| Megasphaera      | 0.0004(<0.0001,0.0026)   | 0.002249096 | 4.52E-04    | 0.0002(<0.0001,0.0014)   | 0.001068905 | 3.59E-04    | 0.0014(0.0002,0.006)     |
| Pseudomonas      | <0.0001(<0.0001,<0.0001) | 1.19E-04    | 4.33E-05    | <0.0001(<0.0001,0.0001)  | 3.58E-04    | 1.86E-04    | 0.0014(0.0005,0.004)     |
| Solobacterium    | 0.0009(0.0002,0.0025)    | 0.002176986 | 4.62E-04    | 0.0006(0.0002,0.0015)    | 0.001129905 | 3.31E-04    | 0.0029(0.002,0.0045)     |
| Peptostreptococ  | 0.0014(0.0001,0.0043)    | 0.003478781 | 8.38E-04    | 0.0007(0.0002,0.0015)    | 0.001252    | 3.12E-04    | 0.0026(0.0015,0.0048)    |
| Halomonas        | 0.0002(<0.0001,0.0042)   | 0.008948795 | 0.002978576 | <0.0001(<0.0001,<0.0001) | 1.29E-06    | 1.29E-06    | <0.0001(<0.0001,0.0002)  |
| Clostridia_UCG-  | 0.0003(<0.0001,0.0014)   | 0.001853904 | 6.61E-04    | 0.0001(<0.0001,0.0007)   | 5.90E-04    | 2.33E-04    | 0.003(0.0015,0.0049)     |
| Lachnospiraceae_ | <0.0001(<0.0001,0.0007)  | 0.001219411 | 3.79E-04    | <0.0001(<0.0001,<0.0001) | 3.93E-04    | 2.60E-04    | 0.0012(0.0002,0.005)     |
| Aggregatibacter  | <0.0001(<0.0001,<0.0001) | 3.85E-04    | 1.28E-04    | <0.0001(<0.0001,0.001)   | 0.001115143 | 5.53E-04    | 0.003(0.0009,0.006)      |
| Muribaculaceae   | <0.0001(<0.0001,<0.0001) | 5.41E-06    | 3.60E-06    | <0.0001(<0.0001,<0.0001) | 0           | 0           | <0.0001(<0.0001,0.0002)  |
| Corynebacterium  | <0.0001(<0.0001,0.0003)  | 0.001918904 | 9.47E-04    | 0.0003(<0.0001,0.0016)   | 0.001773619 | 6.34E-04    | 0.0008(0.0004,0.0021)    |
| Atopobium        | 0.0005(0.0002,0.002)     | 0.002448027 | 6.78E-04    | 0.0001(<0.0001,0.0003)   | 4.14E-04    | 1.73E-04    | 0.0015(0.0008,0.0031)    |
| Faecalibacterium | <0.0001(<0.0001,<0.0001) | 2.69E-04    | 1.97E-04    | <0.0001(<0.0001,<0.0001) | 4.80E-05    | 1.35E-05    | 0.0002(<0.0001,0.001)    |
| [Eubacterium]_no | 0.0009(0.0003,0.0023)    | 0.002049425 | 3.64E-04    | 0.0005(0.0001,0.0006)    | 0.001018    | 4.62E-04    | 0.002(0.0013,0.0032)     |
| Tannerella       | 0.0002(<0.0001,0.0015)   | 0.001451945 | 3.76E-04    | 0.0003(<0.0001,0.0008)   | 0.001828    | 0.00142981  | 0.0015(0.0007,0.0031)    |
| Treponema        | <0.0001(<0.0001,0.0004)  | 8.99E-04    | 2.88E-04    | 0.0002(<0.0001,0.002)    | 0.001288571 | 3.88E-04    | 0.0014(0.0006,0.0038)    |
| Lachnospiraceae_ | <0.0001(<0.0001,0.0002)  | 1.67E-04    | 5.28E-05    | <0.0001(<0.0001,<0.0001) | 1.50E-04    | 7.21E-05    | 0.0002(<0.0001,0.0005)   |
| Saccharimonadale | <0.0001(<0.0001,<0.0001) | 3.37E-04    | 1.02E-04    | <0.0001(<0.0001,0.0001)  | 8.04E-05    | 2.60E-05    | 0.0011(0.0003,0.0032)    |
| Abiotrophia      | <0.0001(<0.0001,0.0006)  | 0.002949863 | 0.001089008 | 0.0004(<0.0001,0.0021)   | 0.004243381 | 0.001837101 | <0.0001(<0.0001,0.0002)  |
| Parvimonas       | <0.0001(<0.0001,0.0001)  | 2.81E-04    | 9.20E-05    | 0.0002(<0.0001,0.0011)   | 0.001252429 | 7.02E-04    | 0.0013(0.0005,0.0027)    |
| Rhodococcus      | <0.0001(<0.0001,<0.0001) | 5.55E-05    | 1.88E-05    | <0.0001(<0.0001,<0.0001) | 1.62E-05    | 8.42E-06    | <0.0001(<0.0001,0.0004)  |
| Bergeyella       | <0.0001(<0.0001,0.0004)  | 4.51E-04    | 9.86E-05    | 0.0011(0.0006,0.0019)    | 0.001391286 | 1.98E-04    | 0.0011(0.0005,0.002)     |
| F0332            | <0.0001(<0.0001,0.0001)  | 0.00142474  | 8.05E-04    | <0.0001(<0.0001,0.0001)  | 4.02E-04    | 2.41E-04    | 0.0002(<0.0001,0.0006)   |
| Johnsonella      | <0.0001(<0.0001,0.0005)  | 9.55E-04    | 3.45E-04    | 0.0002(<0.0001,0.001)    | 6.53E-04    | 1.93E-04    | 0.0005(0.0001,0.0017)    |
| Filifactor       | <0.0001(<0.0001,0.0001)  | 2.14E-04    | 5.86E-05    | <0.0001(<0.0001,0.0002)  | 1.74E-04    | 6.83E-05    | 0.0009(0.0002,0.0019)    |
| Lachnospiraceae_ | <0.0001(<0.0001,<0.0001) | 3.36E-05    | 2.45E-05    | <0.0001(<0.0001,<0.0001) | 3.33E-06    | 2.31E-06    | <0.0001(<0.0001,0.0003)  |
| Fusicatenibacter | <0.0001(<0.0001,<0.0001) | 3.42E-05    | 2.83E-05    | <0.0001(<0.0001,<0.0001) | 7.57E-06    | 3.53E-06    | <0.0001(<0.0001,0.0005)  |
| Dialister        | <0.0001(<0.0001,0.0002)  | 5.88E-04    | 2.05E-04    | 0.0002(<0.0001,0.0006)   | 9.91E-04    | 4.29E-04    | 0.0006(0.0002,0.0015)    |
| Saccharimonadac  | <0.0001(<0.0001,0.0002)  | 5.99E-04    | 1.97E-04    | 0.0003(<0.0001,0.0008)   | 6.51E-04    | 2.30E-04    | 0.0003(<0.0001,0.0006)   |
| Acinetobacter    | <0.0001(<0.0001,<0.0001) | 2.78E-05    | 1.06E-05    | <0.0001(<0.0001,0.0001)  | 1.78E-04    | 8.12E-05    | 0.0001(<0.0001,0.0005)   |
| Sphingomonas     | <0.0001(<0.0001,<0.0001) | 1.94E-05    | 9.12E-06    | <0.0001(<0.0001,<0.0001) | 2.38E-06    | 1.69E-06    | <0.0001(<0.0001,0.0004)  |
| F0058            | <0.0001(<0.0001,0.0001)  | 4.06E-04    | 1.55E-04    | <0.0001(<0.0001,0.0002)  | 6.23E-04    | 3.03E-04    | 0.0003(<0.0001,0.0006)   |
| Kingella         | <0.0001(<0.0001,<0.0001) | 0.001456685 | 9.51E-04    | <0.0001(<0.0001,0.0008)  | 4.28E-04    | 1.52E-04    | <0.0001(<0.0001,0.0002)  |
| Bifidobacterium  | <0.0001(<0.0001,<0.0001) | 1.87E-04    | 1.16E-04    | <0.0001(<0.0001,<0.0001) | 2.13E-05    | 7.69E-06    | <0.0001(<0.0001,0.0003)  |

|                   |                          |             |          |                          |          |          |                          |
|-------------------|--------------------------|-------------|----------|--------------------------|----------|----------|--------------------------|
| Lactobacillus     | <0.0001(<0.0001,<0.0001) | 1.62E-04    | 8.26E-05 | <0.0001(<0.0001,<0.0001) | 1.32E-05 | 5.03E-06 | <0.0001(<0.0001,0.0001)  |
| Roseburia         | <0.0001(<0.0001,<0.0001) | 1.02E-04    | 7.44E-05 | <0.0001(<0.0001,<0.0001) | 1.36E-05 | 5.60E-06 | 0.0002(<0.0001,0.0005)   |
| Leptotrichiaceae  | <0.0001(<0.0001,<0.0001) | 1.34E-06    | 1.34E-06 | <0.0001(<0.0001,<0.0001) | 4.43E-06 | 4.43E-06 | <0.0001(<0.0001,<0.0001) |
| Megamonas         | <0.0001(<0.0001,<0.0001) | 3.13E-05    | 2.33E-05 | <0.0001(<0.0001,<0.0001) | 1.12E-05 | 6.76E-06 | <0.0001(<0.0001,0.0002)  |
| Actinobacteria_un | 0.0004(<0.0001,0.0014)   | 0.001271986 | 2.71E-04 | <0.0001(<0.0001,<0.0001) | 1.23E-04 | 6.19E-05 | <0.0001(<0.0001,<0.0001) |
| [Eubacterium]_ru  | <0.0001(<0.0001,<0.0001) | 5.05E-06    | 3.64E-06 | <0.0001(<0.0001,<0.0001) | 8.67E-06 | 4.00E-06 | <0.0001(<0.0001,0.0002)  |
| Bacteria_unclassi | 0.0003(<0.0001,0.0008)   | 9.71E-04    | 2.48E-04 | <0.0001(<0.0001,0.0006)  | 4.32E-04 | 1.37E-04 | <0.0001(<0.0001,<0.0001) |
| Burkholderiales_u | <0.0001(<0.0001,0.0006)  | 9.14E-04    | 2.43E-04 | 0.0002(<0.0001,0.0006)   | 3.30E-04 | 9.77E-05 | <0.0001(<0.0001,<0.0001) |
| Selenomonadacea   | <0.0001(<0.0001,<0.0001) | 7.96E-06    | 3.81E-06 | <0.0001(<0.0001,<0.0001) | 0        | 0        | <0.0001(<0.0001,0.0001)  |
| Christensenellace | <0.0001(<0.0001,<0.0001) | 2.31E-05    | 1.24E-05 | <0.0001(<0.0001,<0.0001) | 9.52E-07 | 9.52E-07 | <0.0001(<0.0001,0.0002)  |
| Gracilibacteria   | <0.0001(<0.0001,<0.0001) | 1.12E-05    | 5.75E-06 | <0.0001(<0.0001,<0.0001) | 3.30E-05 | 3.04E-05 | <0.0001(<0.0001,0.0002)  |
| Helicobacter      | <0.0001(<0.0001,<0.0001) | 2.74E-07    | 2.74E-07 | <0.0001(<0.0001,<0.0001) | 0        | 0        | <0.0001(<0.0001,<0.0001) |
| Prevotellaceae_N  | <0.0001(<0.0001,<0.0001) | 3.97E-07    | 3.97E-07 | <0.0001(<0.0001,<0.0001) | 0        | 0        | <0.0001(<0.0001,<0.0001) |
| Acholeplasma      | <0.0001(<0.0001,<0.0001) | 1.89E-06    | 1.44E-06 | <0.0001(<0.0001,<0.0001) | 0        | 0        | <0.0001(<0.0001,<0.0001) |
| Phascolarctobacte | <0.0001(<0.0001,<0.0001) | 2.85E-05    | 1.56E-05 | <0.0001(<0.0001,<0.0001) | 2.29E-06 | 1.28E-06 | <0.0001(<0.0001,0.0001)  |
| Pelagibacterium   | <0.0001(<0.0001,0.0004)  | 5.96E-04    | 2.14E-04 | <0.0001(<0.0001,<0.0001) | 0        | 0        | <0.0001(<0.0001,<0.0001) |
| Serratia          | <0.0001(<0.0001,<0.0001) | 1.58E-05    | 4.41E-06 | <0.0001(<0.0001,<0.0001) | 2.38E-06 | 1.65E-06 | <0.0001(<0.0001,0.0001)  |
| Mucispirillum     | <0.0001(<0.0001,<0.0001) | 0           | 0        | <0.0001(<0.0001,<0.0001) | 0        | 0        | <0.0001(<0.0001,<0.0001) |
| Chloroplast       | <0.0001(<0.0001,<0.0001) | 4.52E-04    | 2.07E-04 | <0.0001(<0.0001,<0.0001) | 1.57E-05 | 9.99E-06 | <0.0001(<0.0001,<0.0001) |
| Propionibacterium | <0.0001(<0.0001,<0.0001) | 8.42E-06    | 7.15E-06 | <0.0001(<0.0001,<0.0001) | 0        | 0        | <0.0001(<0.0001,<0.0001) |

| H.mean      | H.se        | p-value    | z-score      | Sig_m<br>rk | q-value     | fixp    | fixps      |
|-------------|-------------|------------|--------------|-------------|-------------|---------|------------|
| 0.175047486 | 0.008138233 | 1.51E-08   | -5.660805023 | ***         | 5.68E-08    | <0.0001 | ***<0.0001 |
| 0.1644046   | 0.010652339 | 3.25E-05   | -4.154902094 | ***         | 7.61E-05    | <0.0001 | ***<0.0001 |
| 0.066261386 | 0.004203388 | 2.02E-05   | -4.26240694  | ***         | 4.83E-05    | <0.0001 | ***<0.0001 |
| 0.039052136 | 0.003438658 | 0.00227463 | -3.051814421 | **          | 0.004213653 | 0.0023  | ** 0.0023  |
| 0.066101664 | 0.003729391 | 1.39E-14   | -7.697287499 | ***         | 1.21E-13    | <0.0001 | ***<0.0001 |
| 0.049955393 | 0.003719139 | 7.98E-17   | -8.331544895 | ***         | 1.04E-15    | <0.0001 | ***<0.0001 |
| 0.06696755  | 0.00370023  | 2.16E-35   | -12.4153966  | ***         | 7.31E-33    | <0.0001 | ***<0.0001 |
| 0.049835936 | 0.003239805 | 1.20E-15   | -8.004612111 | ***         | 1.35E-14    | <0.0001 | ***<0.0001 |
| 0.020140629 | 0.001224668 | 3.95E-04   | -3.543215154 | ***         | 8.21E-04    | 0.0004  | ***0.0004  |
| 0.007034657 | 7.39E-04    | 0.0032375  | -2.944238584 | **          | 0.005964748 | 0.0032  | ** 0.0032  |
| 0.017839043 | 0.001895537 | 1.26E-04   | -3.833703814 | ***         | 2.80E-04    | 0.0001  | ***0.0001  |
| 0.003487557 | 5.64E-04    | 1.96E-10   | -6.364337567 | ***         | 1.01E-09    | <0.0001 | ***<0.0001 |
| 0.00727395  | 4.80E-04    | 2.94E-04   | -3.620735836 | ***         | 6.26E-04    | 0.0003  | ***0.0003  |
| 0.008890107 | 5.18E-04    | 2.26E-06   | -4.728791998 | ***         | 6.22E-06    | <0.0001 | ***<0.0001 |
| 0.010159507 | 8.26E-04    | 6.36E-16   | -8.082251274 | ***         | 7.43E-15    | <0.0001 | ***<0.0001 |
| 0.009792136 | 5.74E-04    | 1.88E-15   | -7.949026242 | ***         | 2.06E-14    | <0.0001 | ***<0.0001 |
| 0.0097705   | 0.003717535 | 4.68E-08   | -5.46290267  | ***         | 1.64E-07    | <0.0001 | ***<0.0001 |
| 0.008773979 | 0.00222949  | 7.04E-21   | -9.373153903 | ***         | 2.65E-19    | <0.0001 | ***<0.0001 |
| 0.007893879 | 7.86E-04    | 1.13E-25   | -10.47442772 | ***         | 9.60E-24    | <0.0001 | ***<0.0001 |
| 0.004582179 | 2.50E-04    | 2.63E-07   | -5.148219861 | ***         | 8.41E-07    | <0.0001 | ***<0.0001 |
| 0.006351971 | 0.001817812 | 3.81E-20   | -9.193169779 | ***         | 1.02E-18    | <0.0001 | ***<0.0001 |
| 0.004129014 | 5.42E-04    | 0.01426303 | -2.450569839 | *           | 0.023024604 | 0.0143  | * 0.0143   |
| 0.004052121 | 4.49E-04    | 6.34E-06   | -4.514825276 | ***         | 1.68E-05    | <0.0001 | ***<0.0001 |
| 0.004736579 | 6.52E-04    | 0.00122717 | -3.232488203 | **          | 0.002350346 | 0.0012  | ** 0.0012  |
| 0.005208914 | 8.97E-04    | 7.11E-29   | -11.15068693 | ***         | 1.20E-26    | <0.0001 | ***<0.0001 |
| 0.003876521 | 2.86E-04    | 2.69E-13   | -7.309195276 | ***         | 2.02E-12    | <0.0001 | ***<0.0001 |
| 0.00317665  | 1.83E-04    | 2.02E-05   | -4.262437992 | ***         | 4.83E-05    | <0.0001 | ***<0.0001 |
| 2.28E-04    | 4.29E-05    | 1.56E-10   | -6.399436917 | ***         | 8.13E-10    | <0.0001 | ***<0.0001 |
| 0.003732014 | 2.59E-04    | 4.61E-18   | -8.662534176 | ***         | 7.45E-17    | <0.0001 | ***<0.0001 |
| 0.003938564 | 6.02E-04    | 8.26E-12   | -6.833971459 | ***         | 5.09E-11    | <0.0001 | ***<0.0001 |
| 0.004090543 | 3.46E-04    | 8.46E-26   | -10.5019907  | ***         | 9.56E-24    | <0.0001 | ***<0.0001 |
| 0.004324393 | 0.001373141 | 9.08E-18   | -8.58018589  | ***         | 1.40E-16    | <0.0001 | ***<0.0001 |
| 0.0027329   | 5.84E-04    | 8.12E-12   | -6.836378233 | ***         | 5.09E-11    | <0.0001 | ***<0.0001 |
| 0.002589129 | 2.88E-04    | 8.89E-09   | -5.750626896 | ***         | 3.46E-08    | <0.0001 | ***<0.0001 |
| 0.00373735  | 0.001093432 | 3.07E-15   | -7.887915183 | ***         | 3.16E-14    | <0.0001 | ***<0.0001 |
| 0.002449621 | 1.50E-04    | 1.56E-08   | -5.65507608  | ***         | 5.80E-08    | <0.0001 | ***<0.0001 |
| 0.002509186 | 2.91E-04    | 2.06E-10   | -6.357020463 | ***         | 1.03E-09    | <0.0001 | ***<0.0001 |
| 0.002843079 | 3.60E-04    | 1.08E-14   | -7.729983536 | ***         | 1.01E-13    | <0.0001 | ***<0.0001 |
| 0.002861486 | 6.93E-04    | 8.84E-09   | -5.751552031 | ***         | 3.46E-08    | <0.0001 | ***<0.0001 |
| 0.002393479 | 3.07E-04    | 6.45E-20   | -9.136428484 | ***         | 1.55E-18    | <0.0001 | ***<0.0001 |
| 3.77E-04    | 9.34E-05    | 0.02261727 | -2.279838431 | *           | 0.033959204 | 0.0226  | * 0.0226   |
| 0.002112964 | 2.04E-04    | 3.92E-20   | -9.190156553 | ***         | 1.02E-18    | <0.0001 | ***<0.0001 |
| 0.002161336 | 7.93E-04    | 6.09E-10   | -6.188008238 | ***         | 2.91E-09    | <0.0001 | ***<0.0001 |
| 0.001701693 | 1.93E-04    | 7.51E-14   | -7.478598287 | ***         | 5.92E-13    | <0.0001 | ***<0.0001 |
| 0.001235293 | 3.46E-04    | 1.75E-07   | -5.224534288 | ***         | 5.92E-07    | <0.0001 | ***<0.0001 |
| 0.001324986 | 1.63E-04    | 1.39E-06   | -4.82645244  | ***         | 3.93E-06    | <0.0001 | ***<0.0001 |
| 0.001667936 | 2.15E-04    | 1.64E-17   | -8.516878184 | ***         | 2.32E-16    | <0.0001 | ***<0.0001 |
| 0.001769564 | 4.42E-04    | 1.30E-14   | -7.705661169 | ***         | 1.16E-13    | <0.0001 | ***<0.0001 |
| 0.001727229 | 5.09E-04    | 2.17E-18   | -8.747891663 | ***         | 3.88E-17    | <0.0001 | ***<0.0001 |
| 0.001271543 | 1.85E-04    | 7.08E-12   | -6.85610981  | ***         | 4.61E-11    | <0.0001 | ***<0.0001 |
| 8.72E-04    | 2.42E-04    | 6.78E-07   | -4.967644729 | ***         | 2.07E-06    | <0.0001 | ***<0.0001 |
| 0.001175071 | 3.05E-04    | 5.91E-15   | -7.80575074  | ***         | 5.77E-14    | <0.0001 | ***<0.0001 |
| 0.001093879 | 3.43E-04    | 1.33E-11   | -6.764865397 | ***         | 7.94E-11    | <0.0001 | ***<0.0001 |
| 7.52E-04    | 1.47E-04    | 4.04E-09   | -5.882446773 | ***         | 1.71E-08    | <0.0001 | ***<0.0001 |
| 2.11E-04    | 4.11E-05    | 0.01537128 | -2.423511072 | *           | 0.024349839 | 0.0154  | * 0.0154   |
| 9.26E-04    | 2.84E-04    | 2.70E-07   | -5.14337304  | ***         | 8.55E-07    | <0.0001 | ***<0.0001 |

|          |          |            |              |     |             |         |            |
|----------|----------|------------|--------------|-----|-------------|---------|------------|
| 8.17E-04 | 3.57E-04 | 0.0361342  | -2.095414103 | *   | 0.053258664 | 0.0361  | * 0.0361   |
| 8.30E-04 | 2.00E-04 | 4.85E-17   | -8.390264588 | *** | 6.58E-16    | <0.0001 | ***<0.0001 |
| 8.16E-04 | 3.33E-04 | 0.00901257 | -2.611576993 | **  | 0.015508939 | 0.009   | ** 0.009   |
| 7.23E-04 | 2.10E-04 | 3.66E-12   | -6.949681602 | *** | 2.43E-11    | <0.0001 | ***<0.0001 |
| 3.70E-05 | 5.68E-06 | 2.05E-11   | -6.702440018 | *** | 1.18E-10    | <0.0001 | ***<0.0001 |
| 6.43E-04 | 1.94E-04 | 1.19E-13   | -7.418129748 | *** | 9.15E-13    | <0.0001 | ***<0.0001 |
| 3.72E-05 | 6.84E-06 | 1.61E-18   | -8.781969435 | *** | 3.03E-17    | <0.0001 | ***<0.0001 |
| 5.66E-05 | 1.18E-05 | 4.53E-07   | -5.045225073 | *** | 1.40E-06    | <0.0001 | ***<0.0001 |
| 5.74E-04 | 2.14E-04 | 1.64E-09   | -6.030211763 | *** | 7.30E-09    | <0.0001 | ***<0.0001 |
| 5.54E-04 | 1.45E-04 | 1.13E-12   | -7.113072459 | *** | 8.02E-12    | <0.0001 | ***<0.0001 |
| 5.48E-04 | 1.92E-04 | 4.29E-11   | -6.593852998 | *** | 2.38E-10    | <0.0001 | ***<0.0001 |
| 4.98E-04 | 2.91E-04 | 0.02177802 | -2.29421722  | *   | 0.032958707 | 0.0218  | * 0.0218   |
| 4.91E-04 | 1.72E-04 | 0.00340805 | -2.928315064 | **  | 0.006211437 | 0.0034  | ** 0.0034  |
| 4.80E-04 | 1.56E-04 | 7.51E-07   | -4.947648046 | *** | 2.25E-06    | <0.0001 | ***<0.0001 |
| 4.04E-04 | 1.50E-04 | 2.82E-09   | -5.941937203 | *** | 1.21E-08    | <0.0001 | ***<0.0001 |
| 0        | 0        | 6.61E-19   | -8.88133847  | *** | 1.32E-17    | <0.0001 | ***<0.0001 |
| 2.97E-04 | 1.53E-04 | 4.67E-11   | -6.581042343 | *** | 2.55E-10    | <0.0001 | ***<0.0001 |
| 2.76E-04 | 1.97E-04 | 0.01008927 | -2.57275483  | *   | 0.016765985 | 0.0101  | * 0.0101   |
| 3.48E-05 | 1.02E-05 | 0.01152469 | -2.526373423 | *   | 0.01878303  | 0.0115  | * 0.0115   |
| 1.25E-04 | 8.85E-05 | 0.02031131 | -2.32054699  | *   | 0.031585013 | 0.0203  | * 0.0203   |

**Supplementary table S19. The relative abundance and distribution of the key 90 OTUs among the CC (n=73), CCR (n=21), and H (n=140) groups.**

|                                          | CC01        | CC02        | CC03        | CC04        | CC05        | CC06        | CC07        | CC08        | CC09        |
|------------------------------------------|-------------|-------------|-------------|-------------|-------------|-------------|-------------|-------------|-------------|
| OTU14 (Streptococcus)                    | 0           | 0           | 0.012127503 | 6.71E-05    | 0           | 0.010277623 | 0.000872492 | 0.000131274 | 0           |
| OTU23 (Solobacterium)                    | 0           | 0.022628372 | 7.50E-05    | 0.004333483 | 0.008075023 | 0.008751423 | 0.000336994 | 0.003761679 | 0.01600664  |
| OTU45 (Atopobium)                        | 0.009718131 | 0.071386964 | 0.000307627 | 0.001744649 | 0.000822134 | 0.005559728 | 0.000807863 | 0.00541392  | 0.010216786 |
| OTU21 (Campylobacter)                    | 0.021703344 | 0.007956251 | 0.000725299 | 0.002930837 | 0.024698841 | 0.001659439 | 0.000526265 | 0.000583943 | 0.000481634 |
| OTU56 (Selenomonas)                      | 0.06207763  | 0.016097531 | 0.000212588 | 0           | 0           | 0.000835776 | 0.005839692 | 0.000923445 | 0.002105867 |
| OTU466 (Prevotella)                      | 0.100747993 | 0.115423888 | 0.000247602 | 0.008811993 | 0.088553533 | 0.050824875 | 0.003822344 | 0.000434562 | 0.011656564 |
| OTU385 (Prevotella)                      | 0.006108127 | 0.002069585 | 0           | 0.000201306 | 0.013091431 | 0.003324935 | 0           | 0.000122221 | 0.004534532 |
| OTU111 (Actinomyces)                     | 0.106119679 | 0           | 0.000110045 | 0.003433019 | 0.000278689 | 0.001695778 | 0.015543276 | 0.029011552 | 0.032090137 |
| OTU31 (Actinomyces)                      | 0.038728123 | 0.099127622 | 0.000587742 | 0.007809794 | 0.001992629 | 0.011743259 | 0.561746091 | 0.865611646 | 0.033145633 |
| OTU174 (Actinomyces)                     | 0.001949402 | 0.01588509  | 7.00E-05    | 0.009141009 | 0.005155752 | 0.003900288 | 0.146209278 | 0.040921272 | 0.00170109  |
| OTU97 (Catonella)                        | 0.001906082 | 0.005797578 | 0           | 0.009790382 | 0           | 0.000617748 | 0           | 0.000144854 | 0.000906906 |
| OTU2 (Fusobacterium)                     | 0.011739733 | 0.187770262 | 0.017682294 | 0.314898351 | 0.000411067 | 6.66E-05    | 0.003379174 | 0.000135801 | 0.431487583 |
| OTU142 (Peptococcus)                     | 0           | 0           | 0.000172571 | 0.000222951 | 0           | 0.000260423 | 0           | 0           | 0           |
| OTU598 (Alloprevotella)                  | 0           | 0.000301529 | 0           | 0           | 0.001616398 | 0           | 0           | 0           | 0           |
| OTU144 (Prevotella)                      | 0           | 0.002535584 | 0           | 0.000380966 | 0.013335284 | 0.000666198 | 0           | 0           | 0.000958144 |
| OTU54 (Alloprevotella)                   | 0           | 0.027809187 | 0           | 0           | 0.021647193 | 0.000884227 | 0           | 0           | 0           |
| OTU12 (Alloprevotella)                   | 0           | 0.07350452  | 0           | 0.000404776 | 0.017007016 | 0.012445796 | 0           | 0           | 0.004134878 |
| OTU84 (Alloprevotella)                   | 0           | 0.000938851 | 0           | 0           | 0           | 0.001980426 | 0.000180038 | 0           | 0           |
| OTU177 (Prevotella)                      | 0           | 0           | 0           | 0           | 0           | 0           | 0           | 0           | 0           |
| OTU60 (Clostridia_UCG-014)               | 0           | 0.000568793 | 3.00E-05    | 0.006543517 | 0           | 0.002622399 | 0.000124642 | 0           | 0           |
| OTU11 (TM7x)                             | 0.002036042 | 0           | 0.000477697 | 0.002142931 | 0.505765385 | 0.265679886 | 0.00408086  | 0.00202343  | 0.074371442 |
| OTU704 (Saccharimonadaceae_unclassified) | 0           | 0           | 4.25E-05    | 0.000138533 | 0.034655017 | 0.028991739 | 0.000553963 | 0.000126747 | 0.006824854 |
| OTU75 (Candidatus_Saccharimonas)         | 0           | 0           | 0           | 0           | 0           | 0.000520846 | 0           | 0           | 0.010775277 |
| OTU225 (Candidatus_Saccharimonas)        | 0           | 0           | 0           | 0           | 0           | 0           | 0           | 0           | 0.000819802 |
| OTU153 (Acinetobacter)                   | 0           | 0           | 0.000260107 | 0           | 0           | 0           | 0           | 0           | 0           |
| OTU44 (Pseudomonas)                      | 0           | 0           | 0.000255105 | 0           | 0           | 0           | 0           | 0           | 0           |
| OTU152 (Pseudomonas)                     | 0           | 0           | 0.002233421 | 6.06E-05    | 0           | 0.000127183 | 0           | 9.96E-05    | 0           |
| OTU146 ([Eubacterium]_ruminantium_group) | 0           | 0           | 0           | 0           | 0           | 0           | 0           | 0           | 0           |
| OTU92 (Faecalibacterium)                 | 0           | 0.000801793 | 0.000575237 | 0.000116887 | 0           | 0           | 0           | 0           | 0           |
| OTU132 (Bacteroides)                     | 0           | 0           | 0.000245101 | 0           | 0           | 7.87E-05    | 0           | 0           | 0           |
| OTU234 (Prevotella)                      | 0           | 0.000287823 | 0           | 0           | 0           | 0           | 0           | 0           | 0           |
| OTU99 (Prevotella)                       | 0           | 0           | 6.25E-05    | 0           | 0           | 0           | 0           | 0           | 0           |
| OTU80 (Fuscatenibacter)                  | 0           | 0           | 0           | 0           | 0           | 0           | 0           | 0           | 0           |
| OTU208 (Bacteroides)                     | 0           | 0           | 5.00E-05    | 0           | 0           | 0           | 0           | 0           | 0           |
| OTU913 (Porphyromonas)                   | 0.003884364 | 0.000109647 | 0.000562732 | 0.001268442 | 0.002556975 | 0           | 0           | 0           | 0.005323591 |
| OTU26 (Prevotella)                       | 0.005530526 | 0.002186084 | 0.000592745 | 0.001478406 | 0.001741808 | 0           | 0.000387774 | 0.000470776 | 0.002433788 |
| OTU5 (Haemophilus)                       | 0.012086294 | 0.000527676 | 0.250620881 | 0.021992104 | 0.005580754 | 7.87E-05    | 0.000540114 | 0.000126747 | 0.008689905 |
| OTU62 (Bergeyella)                       | 0.001920522 | 0.003529259 | 0.002310953 | 0.000476207 | 0.000285657 | 0           | 0           | 0           | 0.001988021 |
| OTU628 (Porphyromonas)                   | 0           | 0           | 0           | 0           | 0           | 0           | 0           | 0           | 0           |
| OTU308 (Alloprevotella)                  | 0           | 0.000137059 | 0           | 6.71E-05    | 0           | 0           | 0           | 0           | 0           |
| OTU35 (Actinobacillus)                   | 0           | 0           | 0           | 0           | 0           | 0           | 0           | 0           | 0.00016396  |
| OTU77 (Haemophilus)                      | 0           | 0           | 0           | 0           | 0           | 0           | 0           | 0           | 0           |
| OTU42 (Haemophilus)                      | 0           | 0           | 0           | 0           | 0           | 0           | 0           | 0           | 0           |
| OTU172 (Aggregatibacter)                 | 0           | 0           | 0           | 0           | 0           | 0           | 0           | 0           | 0           |
| OTU71 (Aggregatibacter)                  | 0           | 0           | 0.00075031  | 0           | 0           | 0           | 0           | 0           | 0           |
| OTU78 (Saccharimonadales)                | 0           | 0           | 0           | 0           | 0           | 0           | 0           | 0           | 0           |
| OTU65 (Alloprevotella)                   | 0           | 0           | 0           | 0           | 0           | 0           | 0.000156956 | 0           | 0           |
| OTU48 (g__Absconditabacteriales_)        | 0           | 0           | 0           | 0           | 0           | 7.27E-05    | 0           | 0           | 0           |



|                                          |             |             |             |             |             |             |             |             |             |
|------------------------------------------|-------------|-------------|-------------|-------------|-------------|-------------|-------------|-------------|-------------|
| OTU53<br>(g__Absconditabacteriales_)     | 0           | 0           | 0           | 0           | 0.045781689 | 0           | 0           | 0           | 0.000204951 |
| OTU33 (Rothia)                           | 0.007942009 | 0.000342646 | 0           | 0.002493593 | 0           | 0.000605635 | 0           | 0           | 0           |
| OTU106 (Cardiobacterium)                 | 0           | 0           | 0.003281354 | 0.000380966 | 0.000627051 | 0           | 0           | 0           | 0           |
| OTU46 (Campylobacter)                    | 0           | 0           | 0.016451786 | 6.49E-05    | 0           | 0.00044817  | 0.000189271 | 0           | 0.007859855 |
| OTU100 (Campylobacter)                   | 0           | 0           | 0.000497705 | 0           | 0.001128692 | 0.001229439 | 0           | 0           | 0.00099401  |
| OTU126 (Prevotella)                      | 0           | 0           | 0           | 0           | 0           | 0.000169578 | 0           | 0.000140327 | 0           |
| OTU63 (Porphyromonas)                    | 0           | 0.000130206 | 0.000125052 | 0.000400447 | 0.017223    | 0           | 0           | 0           | 0.005262106 |
| OTU57 (Parvimonas)                       | 0           | 0.000575646 | 0           | 0.001396152 | 0           | 0           | 0           | 0           | 0           |
| OTU37 (Porphyromonas)                    | 0           | 0.000137059 | 0.025888179 | 0           | 0           | 0           | 0           | 0           | 0           |
| OTU161<br>(Clostridia_vadinBB60_group)   | 0           | 0.000143912 | 0           | 0           | 0           | 0           | 0           | 0           | 0           |
| OTU367 (Fusobacterium)                   | 0           | 0.018050616 | 0.001558143 | 0.020693357 | 0.00057828  | 0           | 0.000364692 | 0.000407402 | 0.028257561 |
| OTU96 (Tannerella)                       | 0           | 0           | 0           | 0           | 0           | 0           | 0           | 0           | 0           |
| OTU86 (Corynebacterium)                  | 0           | 0           | 0           | 0           | 0           | 0           | 0           | 0           | 0           |
| OTU114 (Prevotella)                      | 0           | 0           | 0.000102542 | 0           | 0.000174181 | 0.003191696 | 0           | 0           | 0.000158837 |
| OTU134 (Prevotella)                      | 0           | 0.00084291  | 0.000790326 | 0           | 0           | 0.001405073 | 0           | 0           | 0.000199827 |
| OTU444 (Leptotrichia)                    | 0           | 0           | 0.000522716 | 0.000248926 | 0           | 0.000193803 | 0.035799853 | 0.00468965  | 0.100594869 |
| OTU562 (Leptotrichia)                    | 0           | 0           | 0           | 0           | 0           | 0.000121127 | 0.055982569 | 0.002172811 | 0.008613048 |
| OTU1106 (Leptotrichia)                   | 0           | 0           | 0           | 0           | 0           | 0           | 0.006389039 | 0.000746904 | 0.000942773 |
| OTU961 (Leptotrichia)                    | 0           | 0           | 0           | 0.000699158 | 0           | 0           | 0           | 0           | 0.001337303 |
| OTU966 (Streptococcus)                   | 0           | 0           | 0           | 0.000482701 | 0           | 0           | 0           | 0           | 0.0005175   |
| OTU767 (Gemella)                         | 0           | 0           | 4.50E-05    | 0.000132039 | 0           | 8.48E-05    | 0           | 0           | 0.000650718 |
| OTU1077 (Streptococcus)                  | 0.003826604 | 0.000746969 | 0           | 3.46E-05    | 0.000710658 | 0.000254367 | 0           | 0.000113167 | 0           |
| OTU493 (Prevotella)                      | 0.009573731 | 0.005139697 | 0           | 6.28E-05    | 0.003455748 | 0.000920565 | 0           | 0           | 0.000251064 |
| OTU673 (Prevotella)                      | 0.185669728 | 0.01904429  | 0           | 0.001757637 | 0.00025082  | 0.009532692 | 0.001518782 | 0.002209024 | 0.009340623 |
| OTU611 (Prevotella)                      | 0.056994744 | 0.014487093 | 0           | 0.001225151 | 0           | 0.003555076 | 0.00054473  | 0.000144854 | 0.0060153   |
| OTU1065 (Prevotella)                     | 0.175720557 | 0.000781234 | 0           | 0           | 0.01651931  | 0.008466775 | 0.000193887 | 0.025584848 | 0           |
| OTU761 (Prevotella)                      | 0.060056027 | 0.003700582 | 0           | 0.000380966 | 0.003288534 | 0.003143245 | 0.000867875 | 0.001235786 | 0.0016601   |
| OTU1016 (Veillonella)                    | 0.002021602 | 0           | 0           | 0           | 0           | 0           | 0.000923272 | 0.000122221 | 0           |
| OTU706<br>(Bacteria_unclassified)        | 0           | 0.001576174 | 0           | 0.000266243 | 0.000271722 | 0.001174932 | 0.000794014 | 0           | 0           |
| OTU399 (Streptococcus)                   | 0.001833882 | 0.00124038  | 0           | 0.002982787 | 0           | 0.00125972  | 0.002114292 | 0           | 0.00055849  |
| OTU820 (P5D1-392)                        | 0.005530526 | 0.002357408 | 0           | 0.003363753 | 0           | 0.001302115 | 0.000909422 | 0.000122221 | 0           |
| OTU633 (Rothia)                          | 0.005487206 | 0.003858199 | 5.75E-05    | 6.49E-05    | 0           | 0.000236198 | 0.033962543 | 0.000846491 | 0           |
| OTU939 (Actinomyces)                     | 0.015624097 | 0.001994202 | 0           | 0           | 0.000257788 | 0.000720705 | 0.045069499 | 0.003634932 | 0.000194703 |
| OTU626<br>(Actinobacteria_unclassified)  | 0.003913244 | 0.000150764 | 0           | 0           | 0           | 0.000127183 | 0.007132272 | 0.001267473 | 0           |
| OTU794<br>(Lactobacillales_unclassified) | 0.001848322 | 0.000294676 | 0           | 7.79E-05    | 0.000801232 | 0.003215921 | 0.002875991 | 0.001018505 | 0.000348416 |
| OTU15 (Halomonas)                        | 0.001877202 | 0.029042714 | 0.083034252 | 0           | 0.000411067 | 0           | 0           | 0.000122221 | 0.01544815  |
| OTU93<br>(Xanthomonadaceae_unclassified) | 0.002007162 | 0.000856616 | 0.004149212 | 0           | 0           | 0           | 0           | 0           | 0.000727575 |
| OTU82 (Pelagibacterium)                  | 0           | 0.0033922   | 0.005737367 | 0           | 0           | 0           | 0           | 0           | 0.002618244 |
| OTU101<br>(Rhizobiaceae_unclassified)    | 0           | 0.001528203 | 0.003098778 | 0           | 0           | 0           | 0           | 0           | 0.00091203  |
| OTU692 (Lautropia)                       | 0           | 0           | 0           | 0           | 0           | 0           | 0           | 0           | 0           |
| OTU17 (Lautropia)                        | 0.001920522 | 0.000143912 | 0           | 0.000129875 | 0           | 0           | 0           | 0           | 0.000379159 |
| OTU1050 (Lautropia)                      | 0.009472651 | 0.002425937 | 0           | 0           | 0           | 0           | 0           | 0           | 0.000174208 |
| OTU9 (Gemella)                           | 0           | 0.000157617 | 0.115807771 | 0.042575068 | 0.002612712 | 0.016739747 | 0.000143107 | 0.000439089 | 0.029056869 |
| OTU1 (Streptococcus)                     | 0.029573153 | 0.19459578  | 0.312761514 | 0.38454795  | 0.131506525 | 0.292969791 | 0.005655038 | 0.000461722 | 0.097571848 |
| OTU70 (Streptococcus)                    | 0.007884249 | 0.013781241 | 0.126814811 | 0.121201167 | 0.011537738 | 0.215109378 | 0.00039239  | 0.000226334 | 0.015617234 |
| OTU28 (Leptotrichia)                     | 0.024966788 | 0.021100169 | 0.007888254 | 0.015881502 | 0.015592668 | 0.019846653 | 0.052894225 | 0.004250561 | 0.002587501 |
| OTU137 (Oribacterium)                    | 0           | 0           | 0           | 0           | 0           | 0.000308874 | 0.000175422 | 0           | 0.000128094 |

| CC10        | CC11        | CC12        | CC13        | CC15        | CC16        | CC17        | CC18        | CC19        | CC20        | CC21        |
|-------------|-------------|-------------|-------------|-------------|-------------|-------------|-------------|-------------|-------------|-------------|
| 0           | 0.000863707 | 0           | 0.083864835 | 0           | 4.81E-05    | 0.002178831 | 0.000433967 | 0           | 0.008966622 | 0.003308005 |
| 0.000791157 | 9.38E-05    | 3.29E-05    | 0.007984791 | 0.005902961 | 0.000377748 | 0.026200079 | 0.001130333 | 0.000532744 | 0.021952617 | 0.002302159 |
| 0.000435238 | 9.14E-05    | 0           | 0.002741322 | 0.109189942 | 0.002642458 | 0.05663978  | 0.018687502 | 0.000513013 | 0.013442094 | 0.000386736 |
| 0.015654332 | 0.000252616 | 0           | 0.002256838 | 0.019749414 | 0.00142012  | 0.057313594 | 0.000960447 | 0.004505304 | 0.000701252 | 0.001153569 |
| 0           | 0.000375316 | 0           | 0.013657549 | 0           | 0.000203129 | 0.120863663 | 4.04E-05    | 0           | 0.000570124 | 0.000317024 |
| 0.002873791 | 0.000979189 | 0           | 0.01562615  | 0           | 0.000527422 | 0.006511902 | 0.000570213 | 0.418782844 | 0.002927586 | 0.0010573   |
| 0.000256262 | 0.00051245  | 0           | 0.002189378 | 0           | 0           | 0.000221326 | 2.02E-05    | 0.070401137 | 0.000293614 | 0           |
| 0           | 0           | 0           | 0           | 0           | 0.000561277 | 0.00346744  | 0.005466641 | 0           | 0.038057189 | 0.000411633 |
| 0.070065184 | 0.041891014 | 2.23E-05    | 0.005090151 | 0.267943707 | 0.000992481 | 0.148337596 | 0.023077635 | 0.000578784 | 0.641906665 | 0.002698854 |
| 0.017053601 | 0.040365692 | 0.00267823  | 0.000944438 | 0.114437019 | 0.00017462  | 0.007284084 | 0.000581987 | 0           | 0.129891306 | 0.001266436 |
| 0           | 0           | 0           | 0           | 0           | 0           | 0.006152862 | 6.39E-05    | 0           | 0.001490874 | 0.003679802 |
| 0.001488758 | 9.62E-05    | 2.70E-05    | 0           | 0.000232124 | 0.010769395 | 0.005965965 | 0.003779551 | 0.004906507 | 0.004083512 | 0.072417582 |
| 0           | 0           | 0           | 0           | 0           | 0.000133637 | 7.87E-05    | 0.000650951 | 0           | 0           | 0           |
| 0.000581673 | 0.000182846 | 0           | 0           | 0           | 2.32E-05    | 0           | 0           | 0.000545898 | 0           | 0           |
| 0.000178976 | 0           | 0           | 0.000306636 | 0           | 1.60E-05    | 0.00326087  | 0.000829247 | 0           | 0.001879983 | 0.000300426 |
| 0.004427632 | 0           | 5.05E-05    | 0.00029437  | 0           | 9.09E-05    | 0.002282117 | 0.000605536 | 0           | 7.84E-05    | 0           |
| 0.045675585 | 9.14E-05    | 0           | 0           | 0.00015115  | 0.000538113 | 0.000403305 | 0.000267445 | 0           | 0.000651366 | 0.000992567 |
| 5.08E-05    | 0           | 0           | 0           | 0           | 4.28E-05    | 0.000393468 | 0.000385188 | 0           | 0           | 0           |
| 0           | 8.18E-05    | 0           | 0           | 0           | 3.03E-05    | 0.001441078 | 0.011782714 | 0           | 0           | 5.15E-05    |
| 0           | 0           | 0           | 0           | 0           | 9.62E-05    | 0.001873893 | 0.000465926 | 0           | 0           | 0.00079505  |
| 0.000144401 | 0           | 0.000132679 | 0           | 0           | 0.000112255 | 0.017430651 | 0.002018452 | 0           | 0.026420962 | 0.002247385 |
| 0           | 0           | 1.76E-05    | 0           | 0           | 3.21E-05    | 0.002016526 | 0.00015643  | 0           | 0.00290193  | 3.49E-05    |
| 0           | 0           | 0           | 0           | 0           | 0.000370621 | 0.010667913 | 0.000689638 | 0           | 0           | 0.000413293 |
| 0           | 0           | 0           | 0           | 0           | 0           | 0.003029707 | 0.000129517 | 0           | 2.57E-05    | 0.000126146 |
| 0.001004708 | 0           | 2.23E-05    | 0           | 0           | 1.96E-05    | 9.84E-05    | 2.86E-05    | 0           | 0           | 0.000162662 |
| 0.000162706 | 8.18E-05    | 5.52E-05    | 0           | 0           | 8.55E-05    | 0           | 6.90E-05    | 0           | 0.000380558 | 6.31E-05    |
| 0.000421001 | 7.94E-05    | 0.000165555 | 0           | 0.000148451 | 5.35E-05    | 0           | 8.41E-06    | 0           | 0           | 0           |
| 0           | 0           | 0           | 0.000625537 | 0           | 0           | 0.001209915 | 0           | 0           | 0           | 0           |
| 0.001289443 | 7.46E-05    | 0           | 0.000355697 | 0.000124159 | 0.001858451 | 0.070701357 | 1.51E-05    | 0           | 0.00036773  | 2.82E-05    |
| 0.000801326 | 9.14E-05    | 0           | 0           | 0.000143053 | 0.001739068 | 0.06866024  | 1.51E-05    | 0           | 5.27E-05    | 0           |
| 0.001018945 | 0           | 0           | 0.000349565 | 0           | 0.001938634 | 0.071945701 | 0           | 0           | 0.000168187 | 4.15E-05    |
| 5.29E-05    | 0           | 0           | 0           | 0           | 0.00048644  | 0.01561086  | 0           | 0           | 4.28E-05    | 0           |
| 5.69E-05    | 0           | 0           | 0           | 0           | 0.000438331 | 0.010092465 | 0           | 0           | 8.84E-05    | 0           |
| 0           | 0           | 0           | 0           | 0           | 0.000178183 | 0.004087153 | 0           | 0           | 0           | 0           |
| 0.031670683 | 0.001287141 | 4.23E-05    | 0.188703545 | 0           | 5.52E-05    | 0.000172142 | 0.011027476 | 0.001591655 | 0.000989165 | 0.057180511 |
| 0.100702686 | 0.00497534  | 0           | 0.011247394 | 0.261117649 | 0.000571968 | 0.005729884 | 0.000124471 | 0           | 0.005923586 | 0.004576101 |
| 0.0103969   | 0.000370504 | 0.074270678 | 0.034582362 | 0.000118761 | 0.010192082 | 0.014646862 | 0.001784648 | 0.000552475 | 0.000156784 | 0.115215825 |
| 0.007464128 | 0.000230964 | 0           | 0           | 0           | 0.000167492 | 0.000147551 | 0.000104287 | 0           | 0           | 0.003566935 |
| 0.000469813 | 0           | 0           | 0.005875138 | 0           | 0           | 0           | 0.013811258 | 0.000605092 | 0.000135404 | 0.007860868 |
| 5.49E-05    | 0           | 0           | 0           | 0           | 0           | 0           | 0           | 0           | 0           | 0           |
| 0           | 0           | 0           | 0           | 0           | 2.67E-05    | 0           | 0           | 0           | 0           | 0.027474862 |
| 0           | 0           | 0           | 0           | 0           | 0           | 0           | 0           | 0           | 0           | 0.001825793 |
| 0           | 0           | 0           | 0           | 0           | 0           | 0           | 0           | 0           | 0           | 0.000542758 |
| 0           | 0           | 0           | 0           | 0           | 0           | 0           | 0           | 0           | 0           | 0.009351379 |
| 0           | 0           | 0           | 0           | 0           | 3.74E-05    | 0           | 0           | 0           | 0           | 0.000101249 |
| 0           | 0           | 0           | 0           | 0           | 0           | 0           | 0           | 0           | 0           | 0           |
| 0.002576853 | 0.000101047 | 0           | 0.001747823 | 0           | 0.00035993  | 0           | 0           | 0           | 0.000149657 | 0.001726204 |
| 0           | 0           | 0           | 0           | 0           | 0           | 0           | 3.36E-06    | 0           | 0           | 0.000849824 |

|             |             |             |             |             |             |             |             |             |             |             |
|-------------|-------------|-------------|-------------|-------------|-------------|-------------|-------------|-------------|-------------|-------------|
| 0.000551166 | 0           | 0           | 0           | 0           | 0           | 0           | 0           | 0           | 0           | 0.000109548 |
| 0.035654942 | 0.050814387 | 0           | 0.000300503 | 0.002869158 | 0.003903995 | 0.00047708  | 0.078388266 | 0.000559052 | 0.003081519 | 0.006946312 |
| 0.000530828 | 8.42E-05    | 0           | 0.000318901 | 0           | 3.03E-05    | 0           | 5.89E-05    | 0           | 0.000222348 | 0.001449016 |
| 0.000142368 | 0           | 0           | 0.00029437  | 0           | 0.015845836 | 0.011489278 | 0.002391866 | 0.002729491 | 2.42E-05    | 4.65E-05    |
| 0           | 0           | 0           | 0           | 0           | 0.000277966 | 0.000624631 | 0.001759417 | 0           | 8.84E-05    | 0           |
| 0.00034575  | 0.000288704 | 0           | 0.001729425 | 0           | 0.000716297 | 0.007200472 | 0.00781982  | 0           | 0           | 0           |
| 0.000677263 | 9.62E-05    | 2.70E-05    | 0           | 0           | 0.002505256 | 0.002749361 | 0.000326316 | 0           | 4.85E-05    | 0           |
| 0.000101691 | 0           | 2.82E-05    | 0.000601006 | 0           | 0.005938848 | 0.000103285 | 5.55E-05    | 0           | 0.001039051 | 0           |
| 0           | 0           | 0           | 0.000318901 | 0           | 0.000575532 | 0           | 0.000442377 | 0           | 0           | 0           |
| 0           | 0           | 0           | 0           | 0           | 0           | 0           | 0.000338091 | 0           | 6.13E-05    | 0           |
| 0.00286769  | 0.000173223 | 0           | 0           | 0           | 0.001933288 | 0.020052135 | 0.021190382 | 0.000460396 | 0.000424742 | 0.00731479  |
| 0.002013484 | 0           | 4.58E-05    | 0           | 0           | 0           | 0           | 0.000649269 | 0           | 2.71E-05    | 0           |
| 0           | 0           | 0           | 0           | 0           | 0.003160971 | 0           | 0.001246394 | 0           | 0           | 0.000167641 |
| 5.69E-05    | 7.22E-05    | 0           | 0.000527413 | 0           | 0.000204911 | 0.013313988 | 0.002079006 | 0           | 0           | 0           |
| 0.015918728 | 0.001599904 | 0           | 0.004053723 | 0           | 0.012455009 | 0.002203423 | 0.059808415 | 0           | 0.000786771 | 3.82E-05    |
| 0           | 0           | 0           | 0           | 0           | 0.000383094 | 0.001116467 | 0           | 0.00155877  | 0           | 0.000308725 |
| 0           | 0           | 0           | 0.003734822 | 0           | 0           | 0.000826284 | 0           | 0           | 0           | 0           |
| 0           | 0           | 0.000636388 | 0.000355697 | 0           | 0           | 7.38E-05    | 8.41E-06    | 0           | 0           | 0           |
| 0           | 0           | 0           | 0.000367963 | 0           | 0           | 0           | 0           | 0           | 0.000119726 | 0           |
| 0           | 0           | 0           | 0           | 0           | 1.96E-05    | 0           | 0.008090628 | 0           | 0           | 0           |
| 0           | 0           | 0           | 0           | 0           | 2.49E-05    | 0           | 0.005796321 | 0           | 0           | 0           |
| 0           | 0           | 0           | 0.000944438 | 0           | 2.85E-05    | 0           | 6.22E-05    | 0.003314852 | 0           | 0           |
| 0           | 0           | 0           | 0.004311296 | 0           | 0           | 0           | 0           | 0.014377512 | 5.27E-05    | 0           |
| 0           | 0.000245399 | 3.29E-05    | 0.003869741 | 0           | 0           | 0.003659256 | 5.21E-05    | 0.11053452  | 0.000242303 | 0           |
| 0           | 0.000190064 | 2.11E-05    | 0.004145713 | 0           | 0           | 0.000368877 | 0           | 0.063317614 | 0           | 0           |
| 0           | 0           | 0           | 0.000637802 | 0           | 0           | 0.003433012 | 0.000629084 | 0.001631118 | 0.000364879 | 0           |
| 0           | 0.001448334 | 0           | 0.021225316 | 0           | 0           | 0.000231163 | 3.70E-05    | 0.019540525 | 0           | 0           |
| 0           | 0.000173223 | 0           | 0.00029437  | 0           | 0           | 0           | 2.02E-05    | 0           | 0           | 0           |
| 5.08E-05    | 0.024946469 | 0.000735016 | 0.005599166 | 0           | 0           | 0           | 0.006512872 | 0           | 0.000186716 | 0           |
| 0           | 0.001643209 | 0           | 0.013583957 | 0.000143053 | 0           | 0           | 0.002607167 | 0           | 0.000166761 | 0           |
| 0           | 0.012411885 | 0           | 0.011903594 | 0.000345487 | 0           | 0           | 0.002655946 | 0           | 2.57E-05    | 0           |
| 0           | 0.034656562 | 1.64E-05    | 0.001030296 | 0.000197035 | 0           | 0           | 0.001513839 | 0           | 0.001727475 | 0           |
| 4.47E-05    | 0.008947432 | 2.47E-05    | 0.002943702 | 0.000834026 | 0           | 0.000324611 | 6.56E-05    | 0           | 0.000205245 | 0           |
| 0           | 0.001294358 | 0.000139724 | 0.001195879 | 7.02E-05    | 0           | 0           | 0.000768694 | 0           | 0.000639964 | 0           |
| 0           | 0.003488512 | 9.86E-05    | 0.000576475 | 0.00012146  | 0           | 0           | 0.000926806 | 0           | 0.002425877 | 0           |
| 0.382033212 | 0.001871767 | 0.000292363 | 0.010014719 | 0           | 0.047585617 | 0.049173716 | 0.011412664 | 0.000578784 | 0.027776432 | 0.118324653 |
| 0.019748416 | 0           | 0           | 0           | 0           | 0.00180856  | 0.001701751 | 0.000657679 | 0           | 0.002313277 | 0.005218448 |
| 0.028819264 | 9.86E-05    | 5.75E-05    | 0           | 0           | 0.002480311 | 0.002247688 | 0.000640859 | 0           | 0.003691552 | 0.007294872 |
| 0.013492378 | 0.000113076 | 0           | 0.001306268 | 0           | 0.001443284 | 0.002257525 | 0.000536572 | 0           | 0.00232753  | 0.003289747 |
| 0           | 0           | 2.00E-05    | 0           | 0           | 0           | 0           | 0           | 0           | 0           | 0           |
| 7.93E-05    | 0           | 0.013803274 | 0.000349565 | 0.012189197 | 6.59E-05    | 0.017228999 | 0           | 0.002288826 | 2.71E-05    | 0.022917019 |
| 6.51E-05    | 0           | 0.000697443 | 0           | 0.000580309 | 0           | 0.001691914 | 3.20E-05    | 0           | 0           | 0.014554888 |
| 0           | 5.29E-05    | 0           | 0           | 0.016882956 | 0.181994583 | 0.014371434 | 0.185231659 | 0.001664003 | 2.57E-05    | 0.10416314  |
| 0.089437343 | 0.376424877 | 0.788492653 | 0.331399485 | 0.073885536 | 0.556441324 | 0.059221916 | 0.294646897 | 0.002163862 | 0.035269284 | 0.326199463 |
| 0.079404497 | 0.305403585 | 0.047495427 | 0.189482399 | 0.017501053 | 0.118570258 | 0.029539642 | 0.199946175 | 0.001026026 | 0.011911312 | 0.045274682 |
| 0.010142673 | 0.08029111  | 0.069818312 | 0.004139581 | 0.095122162 | 0.003542283 | 0.006197128 | 0.000743463 | 0.270739199 | 0           | 0.011854375 |
| 0           | 0           | 0           | 0           | 0           | 0.000652151 | 0.001003344 | 6.56E-05    | 0           | 0           | 0           |



|             |             |              |             |             |             |             |             |             |             |             |
|-------------|-------------|--------------|-------------|-------------|-------------|-------------|-------------|-------------|-------------|-------------|
| 0           | 0           | 5.87E-05     | 0           | 9.91E-05    | 0.002364763 | 0.000961435 | 0           | 0.0001494   | 0           | 0.001052331 |
| 0.000478282 | 0           | 0.001840228  | 0.002593421 | 0.001189751 | 0.010754004 | 0.011224856 | 0.003854393 | 0.000816491 | 0           | 0           |
| 0           | 0           | 0.000203703  | 0           | 0           | 0.000281052 | 0           | 0.000613732 | 0           | 0           | 0           |
| 0           | 0.000627149 | 0.012560507  | 0.001520281 | 0.000437259 | 0.004867029 | 0.000109531 | 0.000187638 | 0.002369561 | 0.000300965 | 0.001127497 |
| 0           | 0           | 7.94E-05     | 0           | 0.000474121 | 0.000297673 | 0           | 0           | 0.000250159 | 0.001675961 | 0           |
| 0           | 0           | 0            | 0           | 0.000101688 | 0.001669689 | 0           | 3.91E-05    | 0           | 0           | 0           |
| 0           | 0.003477825 | 0.007989283  | 0.005148515 | 9.28E-05    | 0.001618314 | 0.002517175 | 0.000220865 | 0.000747002 | 0.007435602 | 0.003472692 |
| 0           | 0           | 3.11E-05     | 0.000498243 | 0           | 0.000213055 | 0.000141984 | 8.60E-05    | 0           | 0           | 0           |
| 0           | 0           | 6.91E-05     | 0           | 0           | 0.001592626 | 0           | 0           | 0           | 0.000365879 | 0           |
| 0           | 0           | 0            | 0           | 0           | 5.29E-05    | 0           | 0           | 0           | 0           | 0           |
| 0.000526513 | 0.016049305 | 0.017987971  | 0.008674545 | 0.000279642 | 0.010311272 | 0.004135794 | 0.000795506 | 0.001459261 | 0.087090968 | 0.017934725 |
| 0           | 0           | 0            | 0           | 0           | 0.00080689  | 0           | 0           | 0           | 0.000761264 | 0           |
| 0           | 0           | 0.000286565  | 0           | 0           | 0.000312783 | 0.000263685 | 3.13E-05    | 0           | 0           | 0           |
| 0           | 0.000376289 | 0            | 0           | 0           | 5.74E-05    | 0           | 0           | 0           | 0           | 0           |
| 0           | 0           | 0.000227871  | 0.000498243 | 0           | 0.000459353 | 0           | 6.45E-05    | 0.000135503 | 0.001050426 | 0           |
| 0.00577958  | 0.003631761 | 0.010592533  | 0.003100181 | 0.001651161 | 0.001751284 | 0.010470312 | 0.005496224 | 0.050671086 | 0.072119442 | 0.007712082 |
| 0.007966014 | 0.003398006 | 0.005665693  | 0.000574896 | 0.001193565 | 0.001790571 | 0.001730178 | 0.002773521 | 0.01032948  | 0.037868461 | 0.015138532 |
| 0.002419546 | 0.001106062 | 0.0011712482 | 0.00098797  | 0.003138351 | 0.000302206 | 0.007078921 | 0.003907166 | 0.008550572 | 0.062464961 | 0.003036726 |
| 0.002415527 | 0.002519997 | 0.001622715  | 0.011319067 | 0.001030864 | 0           | 0.004034376 | 0.000506231 | 0.011403079 | 0.001705468 | 0.002510561 |
| 0.000458186 | 0.000381991 | 0            | 0.000493985 | 0.027089723 | 0.000142037 | 0.021340208 | 0.002280972 | 0.001355028 | 0.003534862 | 0           |
| 0           | 0           | 7.25E-05     | 0.001562866 | 0.012500016 | 9.07E-05    | 0.01191855  | 0.001168827 | 0.000510741 | 0.00162285  | 0           |
| 0.005863983 | 0.003751489 | 0.000825168  | 0.002670073 | 0.000538947 | 5.89E-05    | 0           | 0.000686051 | 0.000938096 | 0.004703314 | 0.001127497 |
| 0.008910521 | 0.007075378 | 0.00635621   | 0.002610455 | 0.000130923 | 5.44E-05    | 0           | 0.003959939 | 0.006924539 | 0.008686672 | 0.005622454 |
| 0.134120021 | 0.16634264  | 0.045501626  | 0.002069626 | 0.000838927 | 0.000250831 | 0.000111559 | 0.016764264 | 0.005955173 | 0.046950518 | 0.005938153 |
| 0.105736575 | 0.162283277 | 0.037902485  | 0.002065368 | 0.000422006 | 0           | 0.000125757 | 0.003928666 | 0.004780816 | 0.041232186 | 0           |
| 0.011125089 | 0.001681899 | 0.001456991  | 0.000949643 | 0           | 0.001491387 | 0           | 0.022559536 | 0.000538537 | 0.001268773 | 0.001067364 |
| 0.057080388 | 0.020348125 | 0.011338291  | 0.003155541 | 0.000190665 | 0.000462375 | 0           | 0.0012001   | 0.002383459 | 0.004791833 | 0.00450999  |
| 0.000470244 | 0           | 0            | 0.000532311 | 9.66E-05    | 0           | 0           | 0.00048864  | 0.000281429 | 0           | 0           |
| 0.00881808  | 0.001037646 | 0.000417763  | 0.002486958 | 0.000729612 | 0.00013146  | 0.026121015 | 0.00142292  | 0.003290285 | 0.003735505 | 0.003262226 |
| 0.00195734  | 0.002291943 | 0.001719388  | 0.00448419  | 0.013326232 | 0.000128438 | 0.012539223 | 0.001661376 | 0.004575824 | 0.00343454  | 0           |
| 0.000486321 | 0.003278277 | 0.001446633  | 0.004705632 | 0.010752251 | 5.44E-05    | 0.01359599  | 0.001493284 | 0.003634254 | 0.004272521 | 0.002164795 |
| 0.070484351 | 0.005809677 | 0.00109447   | 0.032832961 | 0           | 0           | 0.009746193 | 0.005290995 | 0.004429898 | 0.007205453 | 0.002239962 |
| 0.073498736 | 0.00839239  | 0.005845227  | 0.036648568 | 0.001249493 | 0.000107283 | 0.000746431 | 0.004765218 | 0.009957716 | 0.001752678 | 0.003247193 |
| 0.008709562 | 0.003266875 | 0.001729745  | 0.033812413 | 0.002619741 | 4.38E-05    | 0.003261577 | 0.010497944 | 0.011399605 | 0.008379806 | 0.003623025 |
| 0.004288465 | 0.001362623 | 0.000794095  | 0.017740871 | 0.002590506 | 0           | 0.002961382 | 0.012474004 | 0.008866745 | 0.003776814 | 0           |
| 0           | 0           | 0.000583487  | 0.001085915 | 0.000546574 | 3.78E-05    | 0.002515147 | 0.004456398 | 0.00121605  | 0.001321885 | 0.002285061 |
| 0           | 0           | 0.000103578  | 0           | 4.96E-05    | 0           | 0.000123729 | 0.000525777 | 0.000128554 | 0           | 0           |
| 0           | 0           | 0.000148461  | 0           | 0           | 0           | 0.000117644 | 0.00042414  | 0           | 0           | 0           |
| 0           | 0           | 0.000127746  | 0           | 5.21E-05    | 0           | 0           | 0.000666505 | 0           | 0           | 0           |
| 0           | 0           | 7.94E-05     | 0.003547322 | 0           | 0           | 0.000900585 | 3.52E-05    | 0.000309224 | 0           | 0.006780018 |
| 0.000438091 | 0           | 5.18E-05     | 0.003670819 | 5.97E-05    | 0.001860079 | 0.001377246 | 9.58E-05    | 0.000142452 | 0           | 0.001202664 |
| 0           | 0           | 0.000110483  | 0.004130736 | 0           | 0.00300544  | 0.00118861  | 4.30E-05    | 0.000118131 | 0           | 0.004434823 |
| 0.002849598 | 0           | 0.004187986  | 0.013124667 | 0.06842977  | 0.065432155 | 0.113893548 | 0.063116664 | 0.005030975 | 0.009760703 | 0.008298381 |
| 0.015353266 | 0.039778331 | 0.09412439   | 0.178937507 | 0.741938354 | 0.588760955 | 0.623174237 | 0.139727612 | 0.412605927 | 0.160131008 | 0.051233482 |
| 0.005462065 | 0.005638637 | 0.011286502  | 0.013073565 | 0.044693213 | 0.094203687 | 0.049799904 | 0.016097759 | 0.04559147  | 0.017438258 | 0.010718742 |
| 0           | 0.001037646 | 0.004957913  | 0.001971681 | 0.025361025 | 0.002641281 | 0.005839603 | 0.008121198 | 0.004030339 | 0.00162285  | 0.000977164 |
| 0           | 0           | 0            | 0           | 0.000396584 | 0           | 0           | 4.30E-05    | 0           | 0           | 0           |

| CC33        | CC34        | CC35        | CC36        | CC37        | CC38        | CC39        | CC40        | CC41        | CC42        | CC43        |
|-------------|-------------|-------------|-------------|-------------|-------------|-------------|-------------|-------------|-------------|-------------|
| 0.034634945 | 0.033812482 | 0.000390995 | 0.0021285   | 0.010107558 | 0           | 0.000157106 | 0           | 0.012282511 | 0           | 0.000316946 |
| 0.000831362 | 0.012430669 | 0.000351007 | 0.002300729 | 0.003577853 | 0.002737628 | 0.00091684  | 0.017259957 | 0.004803886 | 0.006961102 | 8.69E-05    |
| 0.002191306 | 0.013186458 | 0.023099788 | 0.000625551 | 0.002825663 | 0.00409687  | 6.10E-05    | 0.018864061 | 0.002435211 | 0.000408989 | 0.00015707  |
| 0.014076701 | 0.000975523 | 0.001972746 | 0.002827167 | 0.001046633 | 0           | 0.003493839 | 0.014768478 | 0.009814032 | 0.00235445  | 0.000479626 |
| 0.034039649 | 0.004522658 | 0.002128255 | 4.39E-05    | 0.006410938 | 0           | 0.000264969 | 0.053754528 | 0.018590106 | 0.011857915 | 3.65E-05    |
| 0.004238919 | 0.009272294 | 0.495243639 | 0.003311361 | 0.00687116  | 0.001608117 | 5.16E-05    | 0.073930151 | 0.03388669  | 0.000411752 | 8.41E-05    |
| 0.00088268  | 0.000842716 | 0.025232486 | 0.000248596 | 0.00032166  | 0           | 0           | 0.000214531 | 0.001676702 | 0.000373064 | 0           |
| 0.062562545 | 0.004206338 | 0.009539382 | 0.028565765 | 0.001346025 | 0.001340098 | 0.000320073 | 0.002647502 | 0.032522705 | 0           | 0           |
| 0.015200579 | 0.059296803 | 0.317629861 | 0.035092622 | 0.14708786  | 0.065913659 | 0.005485796 | 0.088596239 | 0.051605176 | 0.000447677 | 0.010111408 |
| 0.000980186 | 0.006524411 | 0.009139501 | 0.00195952  | 0.024146796 | 0           | 0.000275521 | 0.017050303 | 0.004091952 | 0           | 0.000715231 |
| 0.000677406 | 0.002578857 | 0.000368779 | 0.001524071 | 0.001402934 | 0           | 0.000131312 | 0.000175525 | 0           | 0           | 0           |
| 0.002704492 | 0.066615637 | 0.001897213 | 0.07302866  | 0.022456842 | 0.011371686 | 0.006431946 | 0.001360319 | 0.003233641 | 0.00079587  | 0.000678769 |
| 0           | 3.62E-05    | 0           | 0           | 0.000309289 | 0           | 3.52E-05    | 0           | 0           | 0           | 0           |
| 0           | 0.000347711 | 0.000373222 | 5.36E-05    | 0           | 0           | 0           | 0           | 0           | 0           | 0           |
| 0.001724306 | 0.013019846 | 0.000377665 | 6.50E-05    | 0.000192996 | 0.002948215 | 0           | 0.009926913 | 0.000805083 | 0           | 2.52E-05    |
| 0.003089382 | 0.003916578 | 0.00327458  | 0.002208115 | 0.000170727 | 0           | 0.000110208 | 0.004085832 | 0           | 0           | 0           |
| 0.000538846 | 0.014084711 | 0.000337677 | 0.00378743  | 0.001031787 | 0.001454963 | 0.000119588 | 0.005173112 | 0.007997605 | 0           | 0.000126217 |
| 0           | 0.00039359  | 0           | 0           | 0.000180625 | 0           | 0           | 0           | 0.001603513 | 0           | 0           |
| 0.000251461 | 9.18E-05    | 0           | 2.92E-05    | 0           | 0           | 0           | 0           | 0.00081839  | 0           | 0           |
| 0.004223523 | 0.00486554  | 0           | 0.000485818 | 0.000504759 | 0           | 0.000200485 | 0.003208207 | 0           | 0           | 0           |
| 0.003812974 | 0.143112062 | 0.00146623  | 0.011407783 | 0.005824527 | 0.002756772 | 0.001987267 | 0.010048806 | 0.004710736 | 0.000201731 | 2.24E-05    |
| 0.000328439 | 0.00936888  | 0.000422097 | 0.001613435 | 0.0008091   | 0           | 6.80E-05    | 0.00133594  | 0           | 0           | 0           |
| 0.000277121 | 0.009818007 | 0           | 0.000178729 | 0.000677961 | 0           | 0.000334142 | 0.000151147 | 0.000745201 | 0           | 0           |
| 0           | 0.005524742 | 0           | 0.000152732 | 0           | 0           | 4.22E-05    | 7.31E-05    | 0.000851658 | 0           | 5.33E-05    |
| 0           | 0           | 0           | 1.95E-05    | 0           | 0           | 0           | 0.00038518  | 0           | 0           | 0.000462797 |
| 0           | 0           | 0           | 7.47E-05    | 0           | 0           | 0           | 0           | 0           | 0           | 0.000513284 |
| 0           | 0           | 0           | 2.44E-05    | 0           | 0           | 0           | 8.29E-05    | 0           | 0           | 0.000159875 |
| 0           | 0           | 0           | 0           | 0           | 0           | 0           | 0           | 0           | 0           | 0           |
| 0           | 0           | 0           | 0.000404577 | 0           | 0           | 6.21E-05    | 0.000297417 | 0           | 0           | 0.001705336 |
| 0           | 4.59E-05    | 0.000404324 | 0.000602804 | 0           | 0           | 4.10E-05    | 0.00010239  | 0           | 0           | 0.00131827  |
| 0           | 0           | 0           | 0.000568683 | 0           | 0           | 1.88E-05    | 0           | 0           | 0           | 0.001741799 |
| 0           | 0           | 0           | 0           | 0           | 0           | 0           | 0           | 0           | 0           | 0.000409505 |
| 0           | 0           | 0           | 0.000116986 | 0           | 0           | 0           | 0           | 0           | 0           | 3.37E-05    |
| 0           | 0           | 0           | 4.22E-05    | 0           | 0           | 0           | 0           | 0           | 0           | 0.000103779 |
| 0.000292516 | 0.065507308 | 0           | 0.062756618 | 0.018052569 | 0           | 0           | 0.008342313 | 0           | 0.575740325 | 0.003822982 |
| 0.000313044 | 0.039467616 | 0           | 0.001725547 | 0.002855354 | 0.00139753  | 0.004414196 | 0.0554854   | 0           | 0.021491262 | 3.09E-05    |
| 0.004526303 | 0.009977375 | 0.002776951 | 0.108857321 | 0.01466029  | 0.004364889 | 0.015588618 | 0.077850209 | 0.007891147 | 0.065733914 | 0.000558161 |
| 0.000292516 | 0.00141982  | 0           | 0.003407224 | 0.000685384 | 0           | 0           | 0.007957133 | 0           | 0           | 0           |
| 0           | 0.00035737  | 0           | 0.002890535 | 0.000524554 | 0           | 9.73E-05    | 0.04509042  | 0.00797099  | 0.004487824 | 0           |
| 0           | 0.002810664 | 0           | 0.000398078 | 0           | 0           | 0           | 0           | 0           | 0           | 0           |
| 0           | 0.000219734 | 0           | 0.069549944 | 0           | 0           | 0.00120643  | 0           | 0           | 0           | 0           |
| 0           | 0.000323564 | 0           | 0.013578528 | 0           | 0           | 7.97E-05    | 0           | 0.002362021 | 0           | 0           |
| 0           | 7.73E-05    | 0           | 0.003100135 | 0.000353826 | 0           | 0           | 0           | 0.000731894 | 0           | 0           |
| 0           | 0.000111074 | 0           | 0.003132632 | 0           | 0           | 7.86E-05    | 0           | 0.000765162 | 0           | 0           |
| 0.000282252 | 0.000173856 | 0           | 0.00122998  | 0           | 0           | 0           | 0           | 0.005835191 | 0           | 0           |
| 0.000261725 | 0.00908878  | 0           | 0           | 0           | 0           | 0           | 0           | 0           | 0           | 0           |
| 0           | 0.004215996 | 0           | 0.001311221 | 0.000168253 | 0           | 0           | 0.000711851 | 0           | 0.001588977 | 0           |
| 0.000626087 | 0.01114607  | 0           | 0.000162481 | 0.005265333 | 0           | 0           | 0           | 0           | 0           | 0           |

|             |             |             |             |             |             |             |             |             |             |             |
|-------------|-------------|-------------|-------------|-------------|-------------|-------------|-------------|-------------|-------------|-------------|
| 0           | 0.006985611 | 0           | 0.000155982 | 0.000707653 | 0           | 0           | 0           | 0           | 0           | 0           |
| 0           | 0.000275271 | 0           | 0.021203756 | 0.009083194 | 0           | 0.001980233 | 0.012910838 | 0.000831698 | 0           | 0           |
| 0           | 0           | 0           | 0.00059468  | 0           | 0           | 0           | 0.011453006 | 0           | 0           | 0.000804986 |
| 0.001016109 | 0.000456371 | 0.000390995 | 0.002216239 | 0.002016563 | 0           | 0.002483205 | 0.108367179 | 0           | 0.001414881 | 0.000546942 |
| 0           | 0.000101416 | 0           | 0.000225848 | 0           | 0           | 0.000460765 | 0.008371567 | 0           | 0           | 0.001245344 |
| 0.000343835 | 0.000246295 | 0           | 0.000903394 | 0.0005394   | 0           | 0.000335315 | 0           | 0.007112678 | 0           | 0           |
| 0.001375339 | 0.029615803 | 0           | 0.002814169 | 0.008266671 | 0.00153154  | 0.000483041 | 0           | 0           | 0           | 0           |
| 0           | 0.009042901 | 0           | 0.00101713  | 0.003924256 | 0           | 0.000152416 | 0           | 0.00070528  | 0           | 2.52E-05    |
| 0.000841626 | 6.52E-05    | 0           | 0           | 0           | 0           | 0           | 0           | 0           | 0           | 0           |
| 0           | 0           | 0           | 0.000155982 | 0           | 0           | 0           | 0           | 0           | 0           | 0           |
| 0           | 0.005780696 | 0           | 0.021613208 | 0.005631531 | 0.001435819 | 0.00356184  | 7.80E-05    | 0.003187065 | 0.000190677 | 0.001127541 |
| 0           | 0.000297003 | 0           | 3.74E-05    | 0           | 0           | 0.000298969 | 0           | 0           | 0           | 0.000126217 |
| 0           | 0           | 0           | 0.000136484 | 0           | 0           | 6.80E-05    | 0           | 0           | 0           | 0           |
| 0.000579901 | 0           | 0           | 0.000102363 | 0           | 0.001569829 | 6.68E-05    | 0           | 0           | 0           | 0           |
| 0           | 0.000492591 | 0           | 0.000628801 | 0           | 0           | 0.0010376   | 0           | 0.000858312 | 0           | 0           |
| 0.01327613  | 0.001035889 | 0.000324348 | 0.000411077 | 0.00127427  | 0           | 0           | 0           | 0.022203001 | 0           | 4.49E-05    |
| 0.040372368 | 0.000835472 | 0           | 0           | 0.002372864 | 0.002871638 | 0           | 0           | 0.02755248  | 0.001738203 | 0           |
| 0.062434248 | 0.001192842 | 0           | 0           | 0.003464035 | 0.001474107 | 0           | 0           | 0.030686317 | 0.000533344 | 0           |
| 0.000323307 | 0.00060125  | 0           | 4.39E-05    | 0.00068291  | 0           | 0           | 0           | 0.000745201 | 0           | 0           |
| 0.00688696  | 0.002685102 | 0           | 0.000243721 | 0.017047999 | 0           | 0.000369315 | 0           | 0.000845005 | 0.000196204 | 0           |
| 0.005126731 | 0.00109867  | 0           | 0.000217724 | 0.011181409 | 0.003082225 | 0.000188761 | 0           | 0.000864966 | 0.00016857  | 0           |
| 0.013835503 | 0.000816155 | 0.003878845 | 0           | 0.000628475 | 0.024485498 | 0           | 0           | 0.003805848 | 0.00035372  | 0           |
| 0.008837068 | 0.001390844 | 0.001199643 | 0           | 0.000504759 | 0           | 0           | 0           | 0.013852756 | 0.001798999 | 0           |
| 0.079446375 | 0.00677795  | 0.006611365 | 0           | 0.003367537 | 0           | 2.93E-05    | 0           | 0.146152567 | 0.002525783 | 0           |
| 0.003079118 | 0.003890017 | 0.00663358  | 0           | 0.00111344  | 0           | 0           | 0           | 0.081725939 | 0.000566505 | 0           |
| 0.059929899 | 0.000622982 | 0.023499669 | 0           | 0.000195471 | 0.015698287 | 4.69E-05    | 0           | 0.008929106 | 0.00061901  | 0           |
| 0.010386891 | 0.000898253 | 0.015608685 | 2.76E-05    | 0.001796349 | 0.100660477 | 0           | 0           | 0.010718919 | 0.002625267 | 0           |
| 0           | 0           | 0           | 0           | 0.00017815  | 0.014549631 | 0           | 0           | 0.000864966 | 0.001354085 | 0           |
| 0.004695655 | 0.001197671 | 0           | 0.000191727 | 0.005878962 | 0           | 7.50E-05    | 0           | 0.002435211 | 0.007284424 | 0           |
| 0.001893658 | 0.002083851 | 0           | 7.64E-05    | 0.014566266 | 0           | 0           | 0           | 0.00321368  | 0.001558579 | 0           |
| 0.001590878 | 0.002525734 | 0.000688684 | 0.000108862 | 0.015019065 | 0           | 0           | 0           | 0.010299744 | 0.002011783 | 0           |
| 0.002334998 | 0.001161451 | 0.003127957 | 0           | 0.013566644 | 0           | 0           | 0           | 0.01287468  | 0           | 0           |
| 0.001524163 | 0.00039359  | 0.007091222 | 0           | 0.014526677 | 0.128534508 | 0           | 0           | 0.004225024 | 0.000212785 | 0           |
| 0.003479403 | 0.001726482 | 0.006829078 | 0           | 0.022380138 | 0.037427013 | 0           | 0           | 0.012302472 | 0.000212785 | 2.80E-05    |
| 0.00231447  | 0.002231146 | 0.004638619 | 0.000134859 | 0.013554273 | 0.019488848 | 0           | 0           | 0.006779999 | 0.000193441 | 0           |
| 0.001041768 | 4.10E-05    | 0           | 0.03808877  | 0.003134951 | 0.001416675 | 0.00020752  | 0.145866143 | 0           | 0.001539235 | 0.125670354 |
| 0           | 0           | 0           | 0.002201616 | 0.000316712 | 0           | 0.000303659 | 0.007474439 | 0           | 0           | 0.005920994 |
| 0           | 0           | 0           | 0.002702057 | 0           | 0           | 0.000215727 | 0.007445185 | 0           | 0           | 0.005993919 |
| 0           | 0           | 0           | 0.001556567 | 0           | 0           | 6.68E-05    | 0.005377891 | 0           | 0.000174097 | 0.004400776 |
| 0           | 0.000205246 | 0           | 0           | 0.005869064 | 0           | 0           | 0           | 0.00457101  | 0.000210021 | 0           |
| 0.000903208 | 0.000859619 | 0           | 0.002079755 | 0.00658414  | 0           | 0           | 0.000507072 | 0.002328753 | 0.000408989 | 0.308023493 |
| 0           | 0.000210075 | 0.000399881 | 0.004513719 | 0.003045876 | 0           | 0           | 8.29E-05    | 0.004817193 | 0.000204494 | 0.038184939 |
| 0.028404863 | 0.070954781 | 0.000742001 | 0.08590852  | 0.096359547 | 0.005877285 | 0.246571231 | 0.005928844 | 0.023660135 | 0.000395172 | 4.77E-05    |
| 0.411585694 | 0.259537303 | 0.012271901 | 0.311063161 | 0.385693042 | 0.494993778 | 0.636428546 | 0.049342025 | 0.311780166 | 0.177321565 | 0.437892676 |
| 0.034491253 | 0.017561821 | 0.009246136 | 0.05075253  | 0.043735912 | 0.029903322 | 0.046937029 | 0.007962009 | 0.018636681 | 0.093277107 | 0.046128214 |
| 0.003787315 | 0.000318735 | 0.000390995 | 0.002214615 | 0.001922539 | 0           | 0.014996541 | 0.109903022 | 0.002401943 | 0.008055424 | 3.37E-05    |
| 0           | 0           | 0           | 6.50E-05    | 0           | 0.015009094 | 0.000561594 | 0           | 0           | 0           | 0           |

| CC44        | CC45        | CC46        | CC47        | CC48        | CC49        | CC50        | CC51        | CC52        | CC53        | CC54        |
|-------------|-------------|-------------|-------------|-------------|-------------|-------------|-------------|-------------|-------------|-------------|
| 0.003795376 | 0.038190895 | 0           | 0.000855015 | 0           | 0           | 0.000324491 | 5.42E-05    | 0.000119221 | 0.020106511 | 0.011808916 |
| 0.001084741 | 0.002477702 | 0.001477965 | 0.001729915 | 0           | 0.010317124 | 0           | 0.000264634 | 0.000302821 | 0.01301602  | 0.007151622 |
| 0.001187122 | 0.001521208 | 0.001433065 | 0.000944494 | 0           | 0.016284034 | 0.02783507  | 8.74E-05    | 0.000581799 | 0.015805793 | 0.007909024 |
| 0.001579579 | 0.001049848 | 0.000390382 | 0.004931251 | 0.234246671 | 0.001531132 | 0.001213506 | 4.18E-05    | 0.003824612 | 0.008894865 | 0.031829089 |
| 0.003071403 | 0.003261262 | 0.000997782 | 0.008232007 | 0.00731474  | 0.007669168 | 0.000600085 | 2.95E-05    | 9.54E-05    | 0.087582226 | 0.035798167 |
| 0.054027438 | 0.00200022  | 0           | 0.304286013 | 7.78E-05    | 0.13418116  | 0.476116603 | 0.000307714 | 0.000395814 | 0.184186324 | 0.100475925 |
| 0.002813015 | 0.00019436  | 0           | 0.013242795 | 0           | 0.009790235 | 0.020491803 | 3.45E-05    | 0.000100146 | 0.005820421 | 0.003055097 |
| 0.017341238 | 0.003441848 | 0           | 0.07751807  | 6.61E-05    | 0.035310595 | 0.011828349 | 5.79E-05    | 0.000548417 | 0.072231906 | 0.029127203 |
| 0.12140329  | 0.011881952 | 0.001495426 | 0.060606663 | 0.048193286 | 0.297593422 | 0.342035312 | 8.12E-05    | 0.007184261 | 0.290118861 | 0.41656744  |
| 0.002245049 | 0.000774378 | 0.000248198 | 0.015678594 | 0.013766177 | 0.031383693 | 0.015877814 | 8.00E-05    | 0.000920387 | 0.008128443 | 0.006860314 |
| 0.001823341 | 0.000388719 | 0.000235726 | 0.000845073 | 7.39E-05    | 0           | 0           | 8.49E-05    | 0.002584713 | 0.004559111 | 0.003288144 |
| 0.041617508 | 0.007228034 | 0.002389689 | 0.054114512 | 0.000365543 | 0.033635357 | 0.000960137 | 0.009110782 | 0.027287316 | 0.003153275 | 0.005567633 |
| 0           | 4.90E-05    | 0.000370427 | 0           | 9.33E-05    | 0           | 0           | 2.22E-05    | 0.000281362 | 0           | 0           |
| 0.000138944 | 0           | 0           | 0           | 0           | 0           | 0           | 0           | 0           | 0.000201459 | 0.000546203 |
| 0.000294952 | 0.001825756 | 0           | 0.001014088 | 0.000260546 | 0           | 0.000320046 | 0           | 0           | 0.005259839 | 0.000152937 |
| 0.000999425 | 0.001925231 | 0.001492932 | 0.00585586  | 0           | 0           | 0.006814302 | 0           | 0.001189826 | 0           | 0.000680933 |
| 0.00046071  | 0.000483603 | 0           | 0.000914667 | 0           | 0.001013249 | 0           | 0.000125547 | 0           | 0.000170802 | 0.006037368 |
| 0.000236449 | 0           | 0.000124723 | 0.000894783 | 0           | 0           | 0           | 3.20E-05    | 0.000119221 | 0           | 0           |
| 0.00040952  | 0           | 0           | 0           | 0           | 0           | 0           | 0           | 0.000109683 | 0           | 0           |
| 0.000541152 | 0.000624399 | 0           | 0           | 0           | 0           | 0           | 0           | 0.000238442 | 0.000862771 | 0.017088882 |
| 0.019620414 | 0.006416927 | 0.054077313 | 0.004672758 | 0           | 0.003409019 | 0.003151559 | 0.000153857 | 0.001754934 | 0           | 0.027000652 |
| 0.001628331 | 0.000125492 | 0.002773835 | 0.000934552 | 0           | 0.000193643 | 0           | 0           | 0.00020506  | 0           | 0.002490687 |
| 0.000270576 | 0.00109882  | 0.001249722 | 0           | 0           | 0           | 0           | 2.34E-05    | 0.000741555 | 0.00010073  | 0.002530742 |
| 0.000287639 | 0.000552471 | 0           | 0           | 0           | 0           | 0           | 0           | 0.000274208 | 8.76E-05    | 0.000673651 |
| 0           | 0           | 0.000619872 | 0           | 0.000377209 | 0           | 0           | 0           | 0.00037197  | 0           | 0           |
| 0           | 0           | 0           | 0           | 0.000392764 | 0           | 0           | 0           | 0.004420717 | 0           | 0           |
| 0           | 0           | 0.000120981 | 0           | 7.39E-05    | 0           | 0           | 0           | 0.001425884 | 0           | 0           |
| 0           | 0           | 0           | 0           | 0           | 0           | 0           | 0           | 5.01E-05    | 0           | 0           |
| 0.000380269 | 0           | 0.000115992 | 0           | 0.000182771 | 0           | 0           | 8.49E-05    | 0.00249172  | 0           | 0           |
| 0           | 6.89E-05    | 0.000134701 | 0           | 8.17E-05    | 0           | 0           | 0           | 0.001800238 | 0           | 0           |
| 0           | 0           | 0           | 0           | 0           | 0           | 0           | 3.20E-05    | 0.002219896 | 0           | 0           |
| 0           | 0           | 0           | 0           | 0           | 0           | 0           | 0           | 0.000777321 | 0           | 0           |
| 0           | 0           | 0           | 0           | 0           | 0           | 0           | 0           | 5.96E-05    | 0           | 0           |
| 0           | 0           | 0           | 0           | 0           | 0           | 0           | 0           | 5.01E-05    | 0           | 0           |
| 0.01588354  | 0.018350912 | 0           | 0           | 0.464441264 | 0           | 0           | 2.83E-05    | 0.002527486 | 0           | 0           |
| 0.007025225 | 0.003092919 | 0           | 0           | 7.00E-05    | 0.003566636 | 0           | 5.79E-05    | 0.00035051  | 0.001756199 | 0.000964959 |
| 0.055604579 | 0.029752322 | 0.024001656 | 0.000775479 | 0.00077775  | 0.002832593 | 0.00231144  | 0.030926439 | 0.101104225 | 0.000805837 | 0.000706423 |
| 0.000163321 | 0.002659819 | 0.001504157 | 0           | 0           | 0           | 0           | 0.001724427 | 0.000283746 | 0.000157664 | 0           |
| 0           | 0.013534774 | 0.000113498 | 0           | 0           | 0           | 0           | 4.92E-05    | 0.000543648 | 0           | 0.000345929 |
| 0           | 0.000123962 | 0           | 0           | 0           | 0           | 0           | 0           | 6.44E-05    | 0           | 0           |
| 0           | 0.000505029 | 0.000120981 | 0           | 8.94E-05    | 0           | 0           | 0.00229185  | 0.000393429 | 0           | 0           |
| 0.000141382 | 0.008906873 | 0           | 0           | 0           | 0           | 0           | 0.000406182 | 0.004938136 | 7.45E-05    | 0           |
| 0           | 0.007913649 | 0           | 0           | 0           | 0           | 0           | 0           | 0.001621406 | 0           | 0           |
| 0           | 0.001143202 | 0           | 0           | 0           | 0           | 0           | 0           | 0.001139753 | 0           | 0           |
| 0           | 0.00364539  | 0           | 0           | 0           | 0           | 0           | 0           | 0           | 0.000249634 | 0           |
| 0           | 0.001599258 | 0           | 0           | 8.17E-05    | 0           | 0           | 0           | 0           | 0           | 0           |
| 0           | 0.001467644 | 0.000127217 | 0           | 0.000132218 | 0           | 0           | 3.20E-05    | 0           | 0           | 0           |
| 0           | 0.001951248 | 0           | 0           | 9.72E-05    | 0.000274703 | 0           | 0           | 0.000236058 | 0           | 0           |



|             |             |             |             |             |             |             |             |             |             |             |
|-------------|-------------|-------------|-------------|-------------|-------------|-------------|-------------|-------------|-------------|-------------|
| 0           | 0.000699388 | 0           | 0           | 0           | 0           | 0           | 0           | 0.000209829 | 0           | 0           |
| 0.002886144 | 0.000615217 | 0.010332037 | 0           | 0           | 0           | 0           | 0.041133912 | 0.052581255 | 0.00010073  | 0.000138372 |
| 0           | 0.001078925 | 0           | 0           | 0           | 0.000513379 | 0.00030671  | 0.007110644 | 0.002587097 | 0           | 0           |
| 0.000948235 | 0.001026892 | 0.016357396 | 0           | 0.013692291 | 0           | 0           | 0.000855444 | 0.006220955 | 7.01E-05    | 0.00016022  |
| 0.00014382  | 0.001570181 | 0.001929462 | 0           | 0.064094388 | 0.000234173 | 0           | 8.00E-05    | 0.006452244 | 0           | 0.000502507 |
| 0.000828791 | 0.004125933 | 0.004408951 | 0.002614756 | 6.22E-05    | 0           | 0           | 6.03E-05    | 0.000360048 | 0           | 0           |
| 0.011195995 | 0.011260613 | 0.030711743 | 0           | 0           | 0           | 0.000657871 | 0.001198852 | 0.001487879 | 0.002513861 | 0.002188455 |
| 0.000392457 | 0.000870792 | 0.000885532 | 0           | 0           | 0           | 0           | 0.000769284 | 0.000233673 | 0           | 0.000149296 |
| 0.000129194 | 0           | 0           | 0           | 0           | 0           | 0           | 0           | 0.004043978 | 0           | 0           |
| 0           | 0           | 0           | 0           | 0           | 0           | 0           | 0           | 0.000639025 | 0           | 0           |
| 0.002530251 | 0.004144297 | 0.00366685  | 0.003927105 | 0           | 0.00274703  | 0           | 0.000748359 | 0.01056537  | 5.69E-05    | 0.000382342 |
| 0           | 0.000321382 | 0           | 0           | 0           | 0           | 0           | 0           | 0.001177904 | 0           | 0           |
| 0.000131632 | 6.27E-05    | 0           | 0           | 0           | 0           | 0           | 0           | 0.002026758 | 0           | 0           |
| 0           | 5.66E-05    | 0.008900219 | 0           | 0           | 0           | 0           | 4.06E-05    | 0.00238919  | 0.000218977 | 0           |
| 0.000475336 | 0.002500658 | 0.00648808  | 0           | 0           | 0           | 0           | 0           | 0.001156444 | 0.000512407 | 0.000163861 |
| 0.025685215 | 0.003204638 | 0.000120981 | 0.083065727 | 0           | 0.007020688 | 0           | 0.000108315 | 0.001909921 | 0.007988298 | 0.024218656 |
| 0.012395304 | 7.35E-05    | 0           | 0.18514063  | 0           | 0.009240829 | 0           | 0           | 0           | 0.004585388 | 0.025096223 |
| 0.017348551 | 0.00133297  | 0           | 0.036377917 | 0           | 0.001598681 | 0           | 5.29E-05    | 0           | 0.004694877 | 0.003204393 |
| 0.003641806 | 0           | 0           | 0.000984262 | 0           | 0.002310207 | 0           | 0           | 0           | 0.000280291 | 0.000316798 |
| 0.007605378 | 0.006551602 | 0           | 0           | 0           | 0.002256167 | 0           | 0.00237801  | 0           | 0.000183941 | 0.00171872  |
| 0.005182383 | 0.005365549 | 0           | 0           | 0           | 0.000274703 | 0           | 0.001437638 | 0           | 0.00010073  | 0.000717347 |
| 0.001562515 | 0.000128553 | 0           | 0.007585775 | 0           | 0.001805835 | 0.00259148  | 0           | 0           | 0.00068321  | 0.000331363 |
| 0.002281614 | 0           | 0           | 0.00097432  | 0           | 0.005525583 | 0.000995697 | 0           | 0           | 0.000551823 | 0.009070617 |
| 0.007359179 | 0.000260166 | 0           | 0.001809451 | 0           | 0.057426438 | 0.008796807 | 0           | 0           | 0.046572127 | 0.001325453 |
| 0.010279449 | 0.000417797 | 0           | 0           | 0           | 0.046123085 | 0.006165321 | 0           | 0           | 0.046528331 | 0.000586258 |
| 0.000533839 | 0.000249454 | 0           | 0.004762236 | 0           | 0.003697232 | 0.019673909 | 0           | 0           | 0.000884669 | 0.012868551 |
| 0.005857604 | 0.000203542 | 0           | 0.058886691 | 0           | 0.037818948 | 0.009388002 | 0           | 0           | 0.002934298 | 0.011863537 |
| 0.001187122 | 5.51E-05    | 0           | 0.000914667 | 0           | 0.000238676 | 0           | 0           | 0           | 0.000613137 | 0.000542562 |
| 0.001645394 | 0.001085047 | 0           | 0           | 0           | 0.002562394 | 0           | 8.74E-05    | 0           | 0.000262773 | 0.000382342 |
| 0.007307989 | 0.001134019 | 0           | 0.001640436 | 0           | 0           | 0           | 0.000364333 | 0           | 0.000328466 | 0.000200275 |
| 0.006223247 | 0.000532576 | 0           | 0.000874899 | 0           | 0           | 0.000253369 | 0.000264634 | 0           | 0.000223357 | 0.000524355 |
| 0.005565089 | 0.000182116 | 0           | 0           | 0           | 0.021994254 | 0.003622737 | 0           | 0           | 0.001839411 | 0.011473912 |
| 0.007800388 | 0.000189768 | 0           | 0.013292505 | 0           | 0.064285007 | 0.008436755 | 2.34E-05    | 5.01E-05    | 0.003551814 | 0.056888899 |
| 0.020588149 | 0.000932008 | 0           | 0.008033167 | 0           | 0.01700907  | 0.004978486 | 0           | 0           | 0.004585388 | 0.012533546 |
| 0.012731696 | 0.001271755 | 0           | 0.002038118 | 0           | 0.007367445 | 0.004231713 | 0           | 0           | 0.004852541 | 0.00540013  |
| 0.004392594 | 0           | 0           | 0           | 0.116234756 | 0.000526889 | 0           | 0.010072079 | 0.105696621 | 0.005960567 | 0.000320439 |
| 0           | 0           | 0           | 0           | 0.004433176 | 0           | 0           | 0.000541576 | 0.004854681 | 0.000451094 | 0           |
| 0.000134069 | 0           | 0           | 0           | 0.005899235 | 0           | 0           | 0.000782823 | 0.005848985 | 0.000394159 | 0.000167502 |
| 0.000433897 | 0           | 0           | 0           | 0.003387102 | 0           | 0           | 0.000569885 | 0.004652006 | 0.000731385 | 0           |
| 0.001484511 | 0           | 0.000143431 | 0           | 0           | 0           | 0           | 0           | 0           | 0           | 0           |
| 0.000528964 | 0.006260828 | 0.181394351 | 0           | 0           | 0           | 0           | 0           | 0.038112588 | 0.000109489 | 0.000211199 |
| 0.000687409 | 0.000676433 | 0.012154237 | 0           | 0           | 0           | 0.000293375 | 0           | 0.005012053 | 8.32E-05    | 0.000207557 |
| 0.042161098 | 0.141357579 | 0.079308736 | 0           | 0.000108885 | 0.006074989 | 0           | 0.572968722 | 0.137893459 | 0.006713849 | 0.015588643 |
| 0.346815004 | 0.580971431 | 0.404023308 | 0.024556834 | 0.010064087 | 0.099446991 | 0.012246186 | 0.231895368 | 0.27613266  | 0.087499015 | 0.061586247 |
| 0.060933219 | 0.038097541 | 0.135954092 | 0.003589076 | 0.010682398 | 0.009389439 | 0.007481064 | 0.040353551 | 0.136508111 | 0.030258306 | 0.008324139 |
| 0.00376125  | 0.000904461 | 0.005677382 | 0.000884841 | 0           | 0.003526106 | 0           | 0.039735662 | 0.009497149 | 0.008509464 | 0.011652338 |
| 0.000148695 | 0           | 0.001926967 | 0           | 8.56E-05    | 0           | 0           | 0.000141548 | 0.005970591 | 0.000240875 | 0.000335005 |

|             |             |             |             |             |             |             |             |             |             |             |
|-------------|-------------|-------------|-------------|-------------|-------------|-------------|-------------|-------------|-------------|-------------|
|             |             |             |             |             |             |             |             |             |             |             |
| CC55        | CC56        | CC57        | CC58        | CC59        | CC60        | CC61        | CC62        | CC63        | CC64        | CC65        |
| 0           | 0.000222935 | 0.009160784 | 0.008461337 | 0.000300415 | 8.17E-05    | 0.001673587 | 0.007242871 | 0.000516205 | 0.0034964   | 0.046801634 |
| 0.001162265 | 0.00193052  | 0.00213534  | 0.000255583 | 0.001938488 | 0.000348113 | 0.001776866 | 0.006296045 | 0.017368773 | 0.000176048 | 0.008547269 |
| 4.84E-05    | 0.002298543 | 0.002257951 | 0.001142509 | 0.001536582 | 0.000326867 | 0.055165    | 0.001720873 | 0.000526326 | 2.35E-05    | 0.001676932 |
| 0.029153484 | 0.000227678 | 0.0008742   | 0.000541634 | 0.010607894 | 0.00053933  | 0.038630992 | 0.00085007  | 0.000283407 | 2.97E-05    | 0.002052971 |
| 0.00207432  | 0.02591261  | 0.000226114 | 0           | 8.73E-05    | 0.003888081 | 0.012412242 | 0.002667699 | 0.003163019 | 0           | 0.029544484 |
| 4.84E-05    | 0.041242932 | 0.001285026 | 0.000869999 | 0.000633307 | 0.001673558 | 0.00556767  | 0.007256693 | 0.001057714 | 6.96E-05    | 0.012490599 |
| 0           | 0.009979888 | 0           | 7.45E-05    | 4.06E-05    | 0.000722376 | 0           | 0.001803807 | 0.000334015 | 1.33E-05    | 0.001016322 |
| 0.208338714 | 0.042983721 | 8.12E-05    | 0.000854766 | 0.002194247 | 0.001140765 | 0.000399032 | 0           | 0.000435231 | 0.000183213 | 0.002947334 |
| 0.339548223 | 0.362392327 | 0.002840751 | 0.005258926 | 0.002403319 | 0.003723013 | 0.010057954 | 0.521065144 | 0.039970445 | 0.000591604 | 0.029127792 |
| 0.044271001 | 0.016743824 | 0.001200631 | 0.000687198 | 0.002924986 | 0.00056548  | 0.003361258 | 0.014140185 | 0.006037572 | 7.68E-05    | 0.001270403 |
| 0           | 0.000175502 | 0.002843935 | 0.001812781 | 0.009394055 | 0.004639874 | 9.15E-05    | 0.009171078 | 0.006138788 | 8.19E-06    | 0.009553428 |
| 0.001111147 | 0.000241908 | 0.031440933 | 0.004204433 | 0.109588513 | 0.803747528 | 0.001992813 | 0.099741523 | 0.634709205 | 0.000352096 | 0.096245706 |
| 0           | 0           | 0.000230891 | 0           | 0.000608949 | 0           | 0           | 0.000939915 | 0.000308711 | 1.43E-05    | 0.000660609 |
| 0           | 0           | 0           | 0           | 0.000223281 | 0           | 0           | 0.000504513 | 0           | 0           | 0.000487835 |
| 0           | 0           | 0.000167197 | 0.000176031 | 0.002594123 | 0.000174874 | 0           | 0           | 0.001123505 | 0           | 0.002815212 |
| 0           | 0           | 0.004210171 | 0.000274202 | 0.000529786 | 0.000189583 | 0.00016196  | 0           | 0.000824915 | 0           | 0           |
| 0.000513872 | 0.001143134 | 0.000880569 | 0.000159105 | 0.01185218  | 0.000601435 | 0.002650042 | 0.002750632 | 0.000749003 | 8.90E-05    | 0.013842307 |
| 0           | 0           | 0.000308916 | 0           | 8.12E-05    | 0           | 0           | 0           | 0           | 0           | 0           |
| 0           | 0           | 0.000421973 | 0           | 0           | 0           | 0           | 0           | 0           | 0           | 0           |
| 6.46E-05    | 0.001133647 | 0.000724519 | 0.001183131 | 0.005161859 | 0.000163433 | 7.75E-05    | 0.002024963 | 0.000718638 | 2.46E-05    | 0.000518324 |
| 0           | 0.00818218  | 0.00316559  | 0.002263014 | 0.003251788 | 0.001882753 | 0           | 0.002868122 | 0.009478937 | 0.000102354 | 0.019513385 |
| 0           | 0.000222935 | 0.000337578 | 0           | 0.00024358  | 0.000161799 | 0           | 0.000822425 | 0.000647786 | 7.16E-06    | 0.000457345 |
| 6.46E-05    | 0.000227678 | 0.000789805 | 0.000377451 | 0.00059271  | 0.000405315 | 9.15E-05    | 0           | 0.000445353 | 1.33E-05    | 0           |
| 0           | 0           | 0.000288215 | 0.000174338 | 0.000397847 | 0           | 0           | 0           | 0.00097168  | 1.33E-05    | 0.000213428 |
| 5.65E-05    | 0           | 0.000234075 | 0           | 0           | 0           | 8.45E-05    | 0           | 0           | 0           | 0           |
| 0           | 0           | 0           | 0           | 0           | 0           | 5.16E-05    | 0           | 0           | 0           | 0           |
| 0           | 0           | 0           | 0           | 0           | 0           | 4.23E-05    | 0           | 0           | 0           | 0           |
| 0           | 0           | 0           | 0           | 0           | 0           | 0           | 0           | 0           | 0           | 0           |
| 0           | 0           | 0.000431527 | 0           | 0           | 0           | 8.92E-05    | 0           | 0           | 0           | 0           |
| 0           | 0           | 0.0017691   | 0           | 0           | 0           | 5.63E-05    | 0           | 0           | 0           | 0           |
| 0           | 0           | 0.000160827 | 0           | 3.65E-05    | 0           | 0           | 0           | 0           | 0           | 0           |
| 0           | 0           | 5.41E-05    | 0           | 0           | 0           | 0           | 0           | 0           | 0           | 0           |
| 0           | 0           | 0           | 0           | 0           | 0           | 0           | 0           | 0           | 0           | 0           |
| 0           | 0           | 9.71E-05    | 0           | 0           | 0           | 0           | 0           | 0           | 0           | 0           |
| 0.086755558 | 0.00037472  | 0.000259553 | 0.014470087 | 0.01280823  | 0.01125239  | 0.000206558 | 0.00936459  | 0.030263771 | 5.63E-05    | 0.001189097 |
| 0.06014453  | 0.000194475 | 0.00018312  | 0.000335136 | 0.008846001 | 0           | 0.000199516 | 0.001375316 | 0.009397964 | 0.000145342 | 0.004075452 |
| 0.00037397  | 0.002770083 | 0.031636792 | 0.003798208 | 0.055371743 | 0.001027996 | 0.023618    | 0.000739492 | 0.013325169 | 0.001685764 | 0.034839523 |
| 0           | 0           | 0.002576421 | 0.00088354  | 0.001280823 | 0           | 0.000589159 | 0.001064315 | 0.000409927 | 1.33E-05    | 0.000813058 |
| 0           | 0           | 0.001243625 | 0.005353712 | 0.000809902 | 0.000321964 | 0           | 0           | 0.000253042 | 2.46E-05    | 0           |
| 0           | 0           | 0           | 0           | 0           | 0           | 0           | 0.001009026 | 0           | 0           | 0           |
| 0           | 0           | 0           | 0           | 0           | 0           | 0           | 0           | 0           | 1.94E-05    | 0.000528488 |
| 0           | 0           | 0           | 8.29E-05    | 0           | 0           | 0           | 0           | 0.000106277 | 0.000195495 | 0           |
| 0           | 0           | 0.002909222 | 0.000724435 | 0           | 0           | 0           | 0           | 0           | 0.000174001 | 0           |
| 0           | 0           | 0.002058907 | 0.004106262 | 0           | 0           | 0           | 0.000234979 | 0           | 5.02E-05    | 0           |
| 0           | 0           | 0.00153184  | 0           | 0           | 0           | 9.39E-05    | 0           | 0           | 0           | 0           |
| 0           | 0           | 0           | 0.000382529 | 0           | 0           | 0           | 0           | 0           | 0           | 0.006880501 |
| 0           | 0.000137555 | 0.000832799 | 0           | 0           | 0.000264762 | 0           | 0.001029759 | 0           | 0.00028352  | 0           |
| 0           | 0           | 0.000186305 | 0           | 0           | 0           | 4.93E-05    | 0           | 0.012864633 | 1.33E-05    | 0.000274407 |

|             |             |             |             |             |             |             |             |             |             |             |
|-------------|-------------|-------------|-------------|-------------|-------------|-------------|-------------|-------------|-------------|-------------|
| 0           | 0           | 0           | 0           | 0           | 0.000168336 | 0           | 0.000269534 | 0.00243426  | 7.16E-06    | 0.015417607 |
| 0.005466951 | 0           | 0.057160555 | 0.030031906 | 0.000318683 | 8.01E-05    | 0.004255559 | 0.001354583 | 0.002363408 | 9.21E-05    | 0.041445617 |
| 0           | 0           | 0.005328    | 0.001144202 | 0           | 0           | 0.000359129 | 0.000587447 | 0.000308711 | 0           | 0.000406529 |
| 0.000110308 | 0           | 0.005813666 | 0.000495934 | 0.009294593 | 0.00051645  | 0.002138342 | 0.001368405 | 0.000273285 | 2.05E-05    | 0           |
| 0.00025021  | 0           | 0.000640124 | 8.29E-05    | 7.71E-05    | 7.19E-05    | 0.000251155 | 0           | 0           | 2.05E-05    | 0           |
| 0.000390112 | 0           | 0.00012898  | 0           | 8.32E-05    | 0           | 0           | 0.000214245 | 0.00042511  | 0.000157625 | 0.000213428 |
| 7.26E-05    | 0           | 0.011511092 | 0           | 0.001818728 | 0.01288509  | 0.000237072 | 0.002411987 | 0.031630195 | 0.000226202 | 0.000233754 |
| 6.19E-05    | 0           | 0.006770668 | 0           | 0           | 0.000251687 | 0.000166655 | 0           | 0.002823944 | 2.56E-05    | 0           |
| 0           | 0           | 0.000261145 | 0           | 0           | 0.001611453 | 5.16E-05    | 0           | 0.000379562 | 1.43E-05    | 0.000294733 |
| 0           | 0           | 0.000159235 | 0           | 0           | 0           | 0           | 0           | 0           | 0           | 0           |
| 6.19E-05    | 0.000184988 | 0.029875653 | 0.000333443 | 0.010758101 | 0.064593786 | 0.00062202  | 0.007325805 | 0.041114193 | 0.000233366 | 0.008730207 |
| 0           | 0           | 0           | 0           | 3.86E-05    | 0.000186314 | 4.69E-05    | 0           | 0.005521367 | 1.54E-05    | 0           |
| 0.000234067 | 0           | 0.001070059 | 0.004546339 | 0           | 7.35E-05    | 0           | 0           | 0.001720683 | 1.02E-05    | 0           |
| 0           | 0           | 0.006071627 | 8.97E-05    | 0.0001157   | 0           | 0.000901343 | 0           | 0           | 0           | 0           |
| 5.65E-05    | 0           | 0.016569985 | 0           | 3.45E-05    | 9.81E-05    | 0.000499964 | 0           | 0           | 8.19E-06    | 0           |
| 0           | 0.026064395 | 7.80E-05    | 7.79E-05    | 0           | 0.021931129 | 0           | 0.029358508 | 0.016250329 | 1.54E-05    | 0.005996301 |
| 0           | 0.041442151 | 0           | 7.45E-05    | 0           | 0.005568176 | 0           | 0.021479813 | 0.000597178 | 1.64E-05    | 0.003211578 |
| 0           | 0.006166281 | 9.87E-05    | 0.000258969 | 0           | 0.00298266  | 0           | 0.011942444 | 0.000136642 | 0.000203684 | 0.006402829 |
| 0           | 0           | 0           | 0.000858151 | 0.000133969 | 0.002412277 | 0           | 0.00279901  | 0.000247981 | 1.13E-05    | 0.000528488 |
| 0           | 0.000194475 | 0.001514324 | 0.005961358 | 0.001928339 | 0.000866197 | 0.000288711 | 0.00085007  | 0.000323893 | 0.005572131 | 0.000772405 |
| 0           | 0.000393693 | 0.000550953 | 0.002784337 | 0.001297062 | 0.000415121 | 7.28E-05    | 0.000221156 | 0.000455475 | 0.004808573 | 0.000254081 |
| 0           | 0.003149547 | 0           | 9.48E-05    | 3.45E-05    | 0.000187948 | 5.63E-05    | 0           | 0           | 0.000135107 | 0           |
| 0           | 0.006128335 | 0           | 7.28E-05    | 0           | 0.00073545  | 0           | 0.00212863  | 0.000151825 | 8.19E-06    | 0.001758237 |
| 0           | 0.061790878 | 0           | 0.000754902 | 0.000231401 | 8.83E-05    | 0           | 0.003165301 | 0           | 0           | 0.008354168 |
| 5.65E-05    | 0.014386408 | 0           | 0.000715972 | 3.65E-05    | 0           | 0           | 0.004056837 | 0           | 0           | 0.004756388 |
| 0           | 0.109147915 | 0           | 0           | 0           | 0.000794286 | 4.93E-05    | 0           | 0           | 0           | 0.000772405 |
| 0           | 0.01960403  | 0           | 0.000367295 | 0           | 0.00100675  | 5.63E-05    | 0.002778277 | 0           | 0           | 0           |
| 0           | 0.00040318  | 0           | 0.00016249  | 0           | 0           | 0           | 0.00030409  | 0           | 5.32E-05    | 0           |
| 0.003677816 | 0.000744697 | 0.000350317 | 0.003771126 | 0.000316654 | 0           | 4.23E-05    | 0.001879829 | 0.000936254 | 0.000263049 | 0.002642438 |
| 0.005717161 | 0.000365234 | 0.000224521 | 0.003293811 | 0.000324773 | 0.000598166 | 5.40E-05    | 0.001313116 | 0.000693334 | 0.002890466 | 0.004878346 |
| 0.004998816 | 0.001062498 | 8.76E-05    | 0.003207488 | 0.000306504 | 9.81E-05    | 0           | 0.002107897 | 0.00091601  | 0.00060491  | 0.004136431 |
| 0.026250511 | 0.02509202  | 0           | 0.000184494 | 0           | 0.000173239 | 0           | 0.02255795  | 0.002044576 | 7.16E-06    | 0.001128118 |
| 0.01651385  | 0.055814329 | 0           | 0.00044177  | 0           | 0.000589995 | 0           | 0.018024244 | 0.001224721 | 5.22E-05    | 0.001534646 |
| 0.003618626 | 0.009875536 | 0           | 0.002269784 | 6.50E-05    | 0.000616144 | 0           | 0.02031183  | 0.000465596 | 0.001230291 | 0.003740065 |
| 0.003056327 | 0.003955906 | 3.82E-05    | 0.001880485 | 0           | 0.000558942 | 4.46E-05    | 0.015425657 | 0.001310755 | 0.001121796 | 0.003902677 |
| 0.018674264 | 0.000189732 | 0.086794171 | 0.001128968 | 0.011139709 | 0           | 0.037002002 | 0.001347672 | 0.000536448 | 2.66E-05    | 0.00602679  |
| 0.001713803 | 0           | 0.006603472 | 7.28E-05    | 0.000284176 | 0           | 0.002103133 | 0           | 0.000328954 | 0           | 0           |
| 0.002596264 | 0           | 0.00519902  | 0           | 0.000560233 | 0           | 0.001863714 | 0           | 0           | 0           | 0.000182938 |
| 0.001856396 | 0           | 0.003297755 | 8.12E-05    | 0.000377548 | 0           | 0.001682976 | 0.000228068 | 0.000106277 | 1.94E-05    | 0.000721589 |
| 0.000129141 | 0           | 0.000136942 | 0.010941004 | 0           | 0.000447808 | 0           | 0.000234979 | 0.003188324 | 0           | 0.036211558 |
| 0.033291363 | 0.000844306 | 0.070181193 | 0.007161415 | 0           | 0.000485397 | 8.92E-05    | 0.00322059  | 0.013097431 | 3.79E-05    | 0.031211253 |
| 0.001611567 | 0           | 0.009468108 | 0.024470003 | 0           | 0.000480494 | 0           | 0.00103667  | 0.004327011 | 1.54E-05    | 0.021728967 |
| 0           | 0.00034626  | 0.070528326 | 0.02054485  | 0.313726525 | 0.004734666 | 0.251519256 | 0.003517769 | 0.013148039 | 0.00504501  | 0.009451796 |
| 0.090885366 | 0.080379843 | 0.387397831 | 0.457394572 | 0.362797675 | 0.030052135 | 0.402120972 | 0.108428822 | 0.050284419 | 0.922031105 | 0.358141757 |
| 0.004918103 | 0.003301332 | 0.064590456 | 0.090090639 | 0.033534828 | 0.002949973 | 0.122988703 | 0.005888288 | 0.005303751 | 0.046965983 | 0.064190906 |
| 0           | 0.009733237 | 0.03676734  | 0.265249956 | 0.003941931 | 0.00284701  | 0.011179938 | 0.005176441 | 0.002500051 | 8.29E-05    | 0.022237128 |
| 0           | 0           | 0.002694255 | 0           | 8.32E-05    | 0           | 6.57E-05    | 0           | 0           | 5.12E-06    | 0           |

| CC66        | CC67        | CC68        | CC69        | CC70        | CC71        | CC72        | CC73        | CC74        | CCR01       | CCR02       |
|-------------|-------------|-------------|-------------|-------------|-------------|-------------|-------------|-------------|-------------|-------------|
| 0.069856296 | 0.005895478 | 0.105951369 | 0           | 0           | 2.60E-05    | 0.00202998  | 0.000815978 | 0.000194651 | 0.000144467 | 0           |
| 0.008600489 | 0.000846972 | 0.000335812 | 0.00543575  | 0.021256539 | 0.010228547 | 0.011044361 | 0.018145788 | 0.004030153 | 0.000591001 | 0.000832895 |
| 0.006163943 | 0.001818906 | 0.000328063 | 0.00185975  | 0.007139823 | 0.000584063 | 0.006453646 | 0.008749093 | 0.012293958 | 0           | 0.000369857 |
| 0.005264495 | 0.00065675  | 0.002929317 | 0.000539557 | 0.190092696 | 0.002118624 | 0.009589542 | 0.027354678 | 0.02378277  | 0           | 0.000845797 |
| 0.008797487 | 0.007675507 | 0.014840321 | 0.000614177 | 0.020342968 | 0.000182287 | 0.001063625 | 0.000207232 | 0.006569459 | 0           | 0.000160558 |
| 0.007589582 | 0.0080379   | 0.001276087 | 0.024337464 | 0.00254869  | 0.003372314 | 0.017997044 | 0.008515957 | 0.129411713 | 0.000423551 | 0.001680125 |
| 0.001474888 | 0.001188537 | 0.000335812 | 0.003799859 | 0.000139654 | 0.000215769 | 0.001664161 | 0.002389649 | 0.027392655 | 0           | 4.01E-05    |
| 0.006638292 | 0.001230192 | 0           | 0.001945849 | 0.000174568 | 0.004438137 | 0.014717357 | 0.010018392 | 0.003835503 | 9.85E-05    | 2.44E-05    |
| 0.077132237 | 0.030585396 | 0.0042674   | 0.018970594 | 0.004870442 | 0.002987279 | 0.010448055 | 0.009850016 | 0.208311583 | 0.007466313 | 0.000920342 |
| 0.006516465 | 0.001428744 | 0.001438827 | 0.001337413 | 0.00114051  | 0.000156246 | 0.00072741  | 0.001483007 | 0.018058271 | 0.000942318 | 0.000273809 |
| 0.001451559 | 0.000147179 | 0.000661292 | 0.007289759 | 0           | 0.00025855  | 0.00089446  | 0.000453321 | 0           | 0.000105067 | 0.000903139 |
| 0.022133689 | 0.003519792 | 0.018446429 | 0.546720469 | 0.201486154 | 0.409746416 | 0.253373256 | 0.257499223 | 0.000305248 | 0.043369625 | 0.045221463 |
| 0           | 1.00E-04    | 0           | 0.000177939 | 0           | 2.79E-05    | 0           | 0.000777122 | 0           | 0           | 0.000309648 |
| 0.001140511 | 6.53E-05    | 0           | 0.000367358 | 0           | 0           | 0.00012053  | 0.000356181 | 0.012731922 | 0.000242967 | 6.88E-05    |
| 0.000523598 | 0.000180502 | 0.000694873 | 0.000195159 | 0.005557075 | 0.018570979 | 0.010407878 | 0.000667029 | 0.007082629 | 0           | 0.000236536 |
| 0.001179392 | 9.58E-05    | 0.001301919 | 0.001412032 | 0           | 5.39E-05    | 0.000109957 | 0           | 0.028073932 | 0.000121484 | 0.001242891 |
| 0.006892315 | 0.000756721 | 0           | 0.001440732 | 0.003246961 | 0           | 0.001452705 | 0.006540773 | 0.100634384 | 0.000797851 | 0.002333826 |
| 4.92E-05    | 0.000323515 | 0           | 0           | 0           | 0           | 0.004098023 | 0           | 0.002614512 | 0           | 0.001467959 |
| 0           | 0.000105524 | 0           | 0           | 0.000104741 | 0           | 0           | 0           | 0           | 0           | 0           |
| 0.003548544 | 0.000458198 | 0.001555069 | 0.001228353 | 0           | 2.60E-05    | 0.000414454 | 0.000148948 | 0.00015926  | 0.000384151 | 8.31E-05    |
| 0.031506615 | 0.002546469 | 0.005662312 | 0.008196674 | 0           | 0.014694585 | 0.031151739 | 0.010944462 | 0.0226768   | 0.000850385 | 0.000613561 |
| 0.002908303 | 0.000144402 | 0.000170489 | 0.000177939 | 0           | 0.001043502 | 0.002909638 | 0.000738265 | 0.002411014 | 0           | 0           |
| 0.001259746 | 9.58E-05    | 0.000178239 | 0.000631396 | 0           | 0           | 0.001843899 | 0           | 0           | 0           | 9.89E-05    |
| 0.000552111 | 0.000102747 | 0           | 0.000361618 | 0           | 0           | 0.000886002 | 0           | 0           | 0           | 3.30E-05    |
| 0           | 0           | 0           | 0           | 0           | 0           | 0           | 0           | 0           | 8.54E-05    | 0           |
| 0           | 0           | 0           | 0           | 0           | 0           | 0           | 0           | 0           | 0           | 0           |
| 0           | 0           | 0           | 0           | 0.000104741 | 0           | 0           | 0           | 0           | 0.000305351 | 0           |
| 0           | 0           | 0           | 0           | 0           | 0           | 0           | 0           | 0           | 0           | 0           |
| 0           | 0           | 0           | 0           | 0           | 0           | 0           | 0           | 0           | 0           | 1.72E-05    |
| 0           | 0           | 0           | 0           | 0           | 0           | 0           | 0           | 0           | 0.000105067 | 0           |
| 0           | 0           | 0           | 0           | 0           | 0           | 0           | 0           | 0           | 0           | 0           |
| 0           | 0           | 0           | 0           | 0           | 0           | 0           | 0           | 0           | 0           | 0           |
| 0           | 0           | 0           | 0           | 0           | 0           | 0           | 0           | 0           | 0           | 0           |
| 0.001894803 | 0.001142718 | 0.005517655 | 0.045012829 | 0.052242323 | 0.002388335 | 0.005717778 | 0.009331935 | 0.021026694 | 0.072069292 | 0.005185165 |
| 0.003888106 | 0.001406528 | 0.001694561 | 0.013299506 | 0.041390025 | 0.000193448 | 0.02679151  | 0.023935343 | 0.076325173 | 0.0002364   | 0.001113871 |
| 0.001832594 | 0.006243986 | 0.029440408 | 0.023774947 | 0.017101825 | 0.253795946 | 0.263878404 | 0.285235986 | 9.29E-05    | 0.011527803 | 0.14923441  |
| 5.44E-05    | 0           | 0           | 0.000711756 | 0           | 0.004882694 | 0.002186458 | 0.00501891  | 0           | 0.002626671 | 0.004028287 |
| 0.000134788 | 0.000238818 | 0           | 0.002737965 | 0.002426492 | 2.79E-05    | 0.003197219 | 0.000220184 | 0           | 0.000111634 | 0.003626892 |
| 0           | 0           | 0.000121409 | 0           | 0           | 0           | 5.50E-05    | 0           | 0           | 0           | 0           |
| 0.000204774 | 0.000455421 | 0.003391704 | 0.000338658 | 0           | 3.72E-05    | 0.017487434 | 0           | 0           | 0.000131334 | 0.045627158 |
| 0.000671346 | 0.000108301 | 0.004864112 | 0.000350138 | 0           | 0           | 0.004962879 | 0.01396876  | 0           | 0           | 0           |
| 0.002117721 | 0.000395716 | 0.013052766 | 0.000424758 | 0           | 2.42E-05    | 0.009291389 | 0.035695783 | 0           | 0           | 0           |
| 0           | 0.000230487 | 0           | 0           | 0           | 0           | 8.67E-05    | 0.024026008 | 0           | 0           | 0           |
| 0.000189221 | 0.000108301 | 0.001299335 | 0.000338658 | 0           | 2.98E-05    | 0           | 0           | 0           | 0           | 0           |
| 0.000648018 | 0.000977489 | 0.002291273 | 0           | 0           | 0           | 0.007094358 | 0           | 0           | 0           | 0           |
| 0.000202181 | 4.58E-05    | 0.001438827 | 0.005143011 | 0.00292692  | 0.001389475 | 0.0143896   | 0.001800332 | 0.000406997 | 0.0001182   | 3.73E-05    |
| 0.003369691 | 9.72E-05    | 0           | 0.002106568 | 0           | 0           | 0.000247404 | 0           | 0           | 0           | 0           |

|             |             |             |             |             |             |             |             |             |             |             |
|-------------|-------------|-------------|-------------|-------------|-------------|-------------|-------------|-------------|-------------|-------------|
| 0           | 0.000186056 | 0.000147241 | 0.001102074 | 0           | 0           | 0           | 0           | 0           | 0           | 0           |
| 0.000435468 | 0.000924726 | 0           | 0.000200899 | 0.003549545 | 0.000394336 | 0.001395611 | 0.003905036 | 0           | 0.018179848 | 0.008509577 |
| 0           | 0.000104136 | 0           | 0           | 0           | 0.003039361 | 0.010788499 | 0           | 0           | 0.002350871 | 0.010573895 |
| 7.78E-05    | 8.61E-05    | 0           | 0.000539557 | 0.084420988 | 0.017964595 | 0.021046243 | 0.005679463 | 0.019863214 | 0.000528618 | 0.00322693  |
| 0.000290312 | 0           | 0           | 0           | 0.003537907 | 7.44E-05    | 5.50E-05    | 0.000356181 | 0.00143776  | 0.001250952 | 0.004034021 |
| 7.00E-05    | 5.55E-05    | 0           | 0           | 0           | 5.21E-05    | 0.008908653 | 0           | 0           | 0           | 0.012622443 |
| 0.003294521 | 2.64E-05    | 0.00091186  | 0.01612357  | 9.89E-05    | 0           | 0.001401955 | 0           | 0           | 0.000144467 | 0.005643902 |
| 6.48E-05    | 0           | 0.00015499  | 0.006394324 | 0           | 4.28E-05    | 0.000198769 | 0.001036162 | 0           | 9.52E-05    | 0.002167534 |
| 0.001638188 | 0           | 0           | 0.000683056 | 0           | 0           | 0           | 0.000181328 | 0           | 0           | 0           |
| 0           | 0           | 0           | 0           | 0           | 0           | 0           | 0           | 0           | 0           | 0.000235103 |
| 0.016667012 | 0.000266588 | 0.000769785 | 0.034893265 | 0.007419131 | 0.02134435  | 0.017597391 | 0.015723759 | 4.42E-05    | 0.002498621 | 0.004942894 |
| 0           | 0           | 0           | 0           | 0           | 0           | 0.000158592 | 0           | 0           | 0.000111634 | 0           |
| 0.000422507 | 7.36E-05    | 0           | 0.000304218 | 0           | 0.000223209 | 0           | 0.000660553 | 0           | 0.00012805  | 0.000341186 |
| 0.000440652 | 0           | 0           | 0           | 0.000122197 | 0           | 4.44E-05    | 0           | 0           | 0           | 4.59E-05    |
| 0.00081391  | 3.75E-05    | 0           | 0           | 0.000168749 | 6.88E-05    | 0.001366008 | 0           | 0           | 0.000219984 | 0.002111625 |
| 0.001226049 | 0.000131905 | 0.000860196 | 0           | 0           | 0.007248709 | 0.002869462 | 0.005193762 | 0           | 0           | 0.001330338 |
| 0.001664109 | 0.000778936 | 0.000335812 | 0.000154979 | 0.001070683 | 0           | 5.92E-05    | 0.0001619   | 0           | 0           | 3.44E-05    |
| 0.005350033 | 0.006293971 | 0.001637731 | 0           | 0.000209481 | 0           | 6.13E-05    | 0.000356181 | 0           | 0           | 2.87E-05    |
| 0.00013738  | 0.000223545 | 0.000328063 | 0           | 0           | 0.000133925 | 0.000818336 | 0.000654077 | 4.42E-05    | 0           | 0.000104649 |
| 0.001456744 | 0.008589126 | 0.003190217 | 0.000470677 | 0           | 8.56E-05    | 0.000133217 | 0           | 0           | 0.000682935 | 0.000764084 |
| 0.001073117 | 0.007821297 | 0.003123055 | 0           | 0           | 0.000163687 | 0.000190311 | 0.000433893 | 0           | 0           | 0.000658001 |
| 0.001332324 | 0.001655066 | 0.000271233 | 0.000143499 | 0.00011056  | 5.21E-05    | 6.34E-05    | 0           | 0.00027428  | 0           | 0           |
| 0.005404467 | 0.001191314 | 0.001121097 | 0.007817836 | 0.000448057 | 0           | 0.001150322 | 0.000738265 | 0.040261717 | 0           | 0           |
| 0.022011861 | 0.003139349 | 0           | 0.011560295 | 0.003264418 | 0.000163687 | 0.001442132 | 0.001547767 | 0.046251648 | 0           | 0           |
| 0.002905711 | 0.002832495 | 0           | 0.008868251 | 0.000128016 | 0.000187867 | 0.000718951 | 0.000699409 | 0.020279058 | 0           | 0           |
| 0.022742825 | 0.000944165 | 0           | 0.000160719 | 0.001157966 | 3.16E-05    | 0.000234716 | 0.000148948 | 0.028463233 | 0           | 0           |
| 0.002190299 | 0.000709512 | 0.000333229 | 0.004878973 | 0.001210337 | 5.58E-05    | 5.71E-05    | 0.000148948 | 0.008856604 | 0           | 2.29E-05    |
| 0.000311048 | 0.000345731 | 0.000901527 | 0           | 0.000122197 | 0           | 0           | 0           | 5.31E-05    | 0           | 0           |
| 0.00205292  | 0.00848499  | 0.002513426 | 0.010578761 | 0.000832107 | 0.000111604 | 0.000549786 | 0.000420941 | 0.000482203 | 9.85E-05    | 0           |
| 0.000730964 | 0.007383927 | 0.005724308 | 0.001308713 | 0.001664213 | 5.21E-05    | 0.000211456 | 0.000304373 | 0.000725516 | 0.001030968 | 6.59E-05    |
| 0.000458796 | 0.004838846 | 0.005295502 | 0.001073374 | 0.00081465  | 2.60E-05    | 0.000277008 | 0.000770646 | 0.000743212 | 0.001451236 | 0           |
| 0.001215681 | 0.00461669  | 0.000330646 | 0.006543563 | 0           | 6.70E-05    | 0           | 0           | 0.003609885 | 0           | 0           |
| 0.001658925 | 0.001466233 | 0.000968689 | 0.001216873 | 0.000192025 | 0           | 0           | 0.000569889 | 0.00684374  | 0           | 2.72E-05    |
| 0.010523806 | 0.017254618 | 0.003693935 | 0.002692045 | 0.000128016 | 3.16E-05    | 0.000181852 | 0           | 0.001486423 | 0.0001379   | 0           |
| 0.009769513 | 0.012493526 | 0.003557027 | 0.002163968 | 0           | 0           | 0           | 0.00012952  | 0.002809163 | 0.0002167   | 0           |
| 0.000111459 | 0           | 0           | 0.000373098 | 0.02314769  | 7.81E-05    | 0.010289462 | 0.019758315 | 6.64E-05    | 0           | 0           |
| 0.000217734 | 0           | 0.000149824 | 0           | 0.001902789 | 0           | 0.000881773 | 0.002622785 | 0           | 0           | 0           |
| 7.78E-05    | 0           | 0           | 0           | 0.00102995  | 0           | 0.000850054 | 0.000945498 | 0           | 0           | 0           |
| 0           | 5.69E-05    | 0           | 0           | 0.00102995  | 0           | 0.000524412 | 0.000744741 | 4.87E-05    | 0           | 0           |
| 0.000114051 | 0.000230487 | 0.001247672 | 0.006164726 | 0.001559472 | 0           | 0           | 0           | 0           | 0.007742113 | 0           |
| 0.000596176 | 0.001101063 | 0           | 0.00890269  | 0.032231035 | 0.001928897 | 0.002385227 | 0           | 0           | 0.038484017 | 0.004336501 |
| 7.00E-05    | 0.000294357 | 0.000663875 | 0.004161477 | 0.009141534 | 0.000159966 | 0.000186082 | 0           | 0           | 0.131474745 | 0.001981172 |
| 0.007841013 | 0.013344663 | 0.008555465 | 0.004620674 | 0           | 0.053852864 | 0.027755751 | 0.046141592 | 5.31E-05    | 0.029622285 | 0.56326059  |
| 0.549031603 | 0.759634997 | 0.693736584 | 0.127869266 | 0.112636963 | 0.070764658 | 0.082888747 | 0.058057455 | 0.065561877 | 0.541984056 | 0.061876494 |
| 0.036369339 | 0.052659422 | 0.035813092 | 0.006491904 | 0.041326017 | 0.012754528 | 0.014142196 | 0.005226142 | 0.041288056 | 0.070595072 | 0.013244606 |
| 0.000699859 | 0.000265199 | 0.000178239 | 0.000154979 | 0.090629782 | 0.0773456   | 0.04933275  | 0.061049373 | 0.00203056  | 0.008116414 | 0.030931796 |
| 5.18E-05    | 0           | 0           | 0.000109059 | 0.000401506 | 0           | 0           | 0.000744741 | 0           | 0           | 0.000246571 |

| CCR03       | CCR04       | CCR05       | CCR06       | CCR07       | CCR08       | CCR09       | CCR10       | CCR11       | CCR12       | CCR13       |
|-------------|-------------|-------------|-------------|-------------|-------------|-------------|-------------|-------------|-------------|-------------|
| 0           | 0.000291731 | 0.000131491 | 0           | 0.000124633 | 0.00156589  | 0           | 0.000166332 | 0.000232001 | 0           | 0.000630553 |
| 0.000268064 | 0.000369244 | 0.000438302 | 0.003840952 | 0.002675953 | 0.000576429 | 0.0014126   | 0.002339303 | 5.46E-05    | 0.000121552 | 0.000112811 |
| 0           | 0           | 0.000124916 | 0           | 0.001660557 | 0.000319986 | 0.000463333 | 0.000897764 | 0.000148877 | 0.000203344 | 0.00033962  |
| 0.001205626 | 0.001639049 | 0.002982648 | 0.000220157 | 0.00243585  | 0.000721671 | 0.003207814 | 0.001767805 | 4.71E-05    | 0.000537328 | 0.000970173 |
| 0           | 3.24E-05    | 7.23E-05    | 0           | 0.000218109 | 0.000120279 | 0           | 0           | 0           | 0           | 3.09E-05    |
| 0.000172987 | 0.000658156 | 0.008564428 | 0.006388483 | 0.003861804 | 0.00202431  | 0.002387698 | 0.00118138  | 5.33E-05    | 0.000713409 | 0.000281433 |
| 0           | 0.000128249 | 0.000440494 | 0.001026089 | 0.000111804 | 7.72E-05    | 0.000681277 | 0.00021751  | 0           | 5.45E-05    | 0           |
| 3.83E-05    | 0           | 7.01E-05    | 0           | 0.011206012 | 0           | 0.000439117 | 0.001584414 | 0.000155081 | 9.09E-05    | 0.000548617 |
| 0.000454256 | 9.30E-05    | 0.000190662 | 0.000267333 | 0.034065249 | 0.013505233 | 0.014093716 | 0.010962953 | 0.010132352 | 0.001246193 | 0.002614835 |
| 0.000221846 | 0           | 4.82E-05    | 0.000104181 | 0.002740103 | 0.001901762 | 0.00070065  | 0.005075244 | 0.001624005 | 0.00013064  | 0.000429868 |
| 0.000422563 | 0.000396021 | 0.001571314 | 0           | 0.000764296 | 0           | 0.001175284 | 0.003245597 | 9.55E-05    | 0           | 0.000148435 |
| 0.156600637 | 0.091654241 | 0.208572756 | 0.027653284 | 0.031719208 | 0.03249562  | 0.06570287  | 0.081828708 | 0.011464805 | 0.009057335 | 0.016754184 |
| 0.000426525 | 0.000140933 | 0           | 0           | 0           | 0           | 0.000489163 | 0.000656796 | 0           | 2.61E-05    | 6.17E-05    |
| 7.00E-05    | 0           | 0           | 0           | 0           | 0           | 7.43E-05    | 9.60E-05    | 3.47E-05    | 0           | 0           |
| 5.81E-05    | 6.20E-05    | 0.000883179 | 0           | 0.000384897 | 0.000197438 | 0.000226016 | 0.00059922  | 0.000143915 | 3.29E-05    | 0.00015081  |
| 0.001571407 | 0.000412933 | 0.001071649 | 0           | 0.00973607  | 8.62E-05    | 0.011150664 | 0.009800765 | 0.000233241 | 0.000189712 | 0.00216003  |
| 0.0026397   | 0.001009079 | 0.002193703 | 0           | 0.001873167 | 0.003159013 | 0.001927594 | 0.011777551 | 0.001414336 | 0.000163584 | 0.00085855  |
| 0.000116205 | 2.82E-05    | 8.33E-05    | 0           | 0.00022544  | 5.90E-05    | 0.000431045 | 0.000294279 | 0           | 0           | 0.000225622 |
| 0           | 0           | 0           | 0           | 0.000164956 | 0           | 0           | 0           | 0           | 0           | 0           |
| 0.000471422 | 0.000823048 | 0.000392281 | 0           | 0.001402126 | 0           | 4.84E-05    | 0.00070371  | 0           | 0           | 3.56E-05    |
| 0.00111187  | 0.00316676  | 0.006129659 | 0           | 0.000227273 | 0.000397146 | 0.003874561 | 0.003290379 | 0.00084612  | 9.32E-05    | 0.001449916 |
| 0.000109602 | 0.000259316 | 0.000495282 | 4.72E-05    | 0           | 0           | 0.0002018   | 0.000351855 | 4.96E-05    | 0           | 0.000108061 |
| 6.87E-05    | 0.00098653  | 0.001189991 | 0           | 0           | 0           | 0.000456875 | 0.00046061  | 0           | 0           | 0.000142498 |
| 0           | 0.000262135 | 0.000309003 | 0           | 0           | 0           | 0.000305122 | 0.000313471 | 0           | 0           | 7.12E-05    |
| 0.000145256 | 0           | 0           | 8.65E-05    | 0           | 0.001007616 | 0.00041813  | 0.000567233 | 3.97E-05    | 0           | 0           |
| 0           | 0           | 0           | 0           | 0           | 0.000174744 | 0           | 0.000183391 | 0           | 0           | 0           |
| 0           | 0           | 0           | 0           | 0           | 0.003621971 | 9.04E-05    | 0.000739962 | 4.47E-05    | 3.52E-05    | 9.26E-05    |
| 0           | 0           | 0           | 2.56E-05    | 4.95E-05    | 6.58E-05    | 0           | 0.000140742 | 0           | 0           | 0           |
| 0           | 0           | 4.60E-05    | 9.44E-05    | 7.88E-05    | 0.00034495  | 0.000182427 | 0.000467008 | 2.61E-05    | 3.52E-05    | 7.72E-05    |
| 0           | 4.37E-05    | 0           | 0.000151358 | 9.71E-05    | 0.00022921  | 5.33E-05    | 0.000332663 | 0           | 0           | 0           |
| 0           | 0           | 0           | 0.000104181 | 3.12E-05    | 0.000108931 | 0           | 0.000330531 | 5.33E-05    | 0           | 0           |
| 0           | 0           | 0           | 0           | 6.60E-05    | 0.000124817 | 0           | 0.000219643 | 5.58E-05    | 0           | 0           |
| 0           | 0           | 0           | 2.75E-05    | 3.48E-05    | 0           | 3.71E-05    | 0.000100225 | 0           | 0           | 0           |
| 0           | 0           | 8.11E-05    | 0           | 0           | 0           | 0           | 3.63E-05    | 0           | 0           | 0           |
| 0.003682903 | 0           | 0           | 0.01367725  | 7.70E-05    | 5.90E-05    | 0.004173225 | 0.00884116  | 0.00117241  | 8.63E-05    | 0.001156608 |
| 0.001369369 | 0.002594573 | 5.92E-05    | 0.000133667 | 0.009409824 | 0.000372183 | 0.002500706 | 0.004934502 | 0.001544604 | 0.00016472  | 0.00049993  |
| 0.014497883 | 0.778112571 | 0.413075875 | 0.165062666 | 0.027824413 | 0.483782827 | 0.083106106 | 0.135645484 | 0.000238204 | 0.000644113 | 0.023496707 |
| 0.001832868 | 0.000489037 | 0.007045711 | 0.002968187 | 0.00065066  | 0.003510771 | 0.001787141 | 0.001998111 | 0.003025934 | 0.000695233 | 0.000432243 |
| 0.006959089 | 0           | 0           | 0           | 0           | 0           | 0           | 1.71E-05    | 0.007183338 | 0           | 6.89E-05    |
| 0.000137333 | 0           | 0           | 0           | 0.000175953 | 0           | 0           | 0.000279352 | 0           | 0           | 7.12E-05    |
| 0           | 0.000563731 | 0           | 0           | 0           | 0.004053159 | 0           | 0           | 0           | 0           | 0           |
| 0           | 0           | 0           | 0           | 0           | 0           | 0.002489405 | 0.005678729 | 0           | 0           | 0           |
| 0           | 0           | 0           | 0           | 0           | 0           | 0.000464947 | 0.008868882 | 0           | 0           | 4.39E-05    |
| 0           | 0           | 0           | 0           | 0           | 0           | 0.000305122 | 0           | 0           | 0           | 0           |
| 0           | 0           | 0           | 0.000375446 | 0           | 0.00233068  | 0.001373855 | 0.002665569 | 0           | 0           | 0           |
| 0           | 0           | 0           | 4.13E-05    | 0           | 7.04E-05    | 0           | 0           | 0           | 0           | 0           |
| 0           | 0           | 0           | 3.34E-05    | 0.001006232 | 0.001686168 | 0           | 0.000835922 | 0.000637692 | 0           | 0.000467868 |
| 0.00036182  | 0           | 0           | 0           | 0.001189516 | 0           | 5.00E-05    | 0.000198318 | 9.93E-06    | 0           | 0.000118748 |

|             |             |             |             |             |             |             |             |             |             |             |
|-------------|-------------|-------------|-------------|-------------|-------------|-------------|-------------|-------------|-------------|-------------|
| 0           | 0           | 0           | 0           | 8.61E-05    | 0           | 0           | 0           | 0           | 0           | 0.000111623 |
| 0.005214695 | 0.000245223 | 0.000674986 | 0           | 0.014620601 | 0.006254482 | 0.05732736  | 0.067270436 | 0.02717634  | 0.003670419 | 0.000942861 |
| 0.003214122 | 0           | 0           | 0           | 0.000931085 | 0.000658128 | 0.004284619 | 0.000835922 | 0.002944052 | 0.000293088 | 0.000396619 |
| 0.003144135 | 0.000722985 | 0.002932243 | 0.000605432 | 0.002631965 | 0.000853297 | 0.008088146 | 0.004964356 | 0.000168728 | 0.000710001 | 0.001130483 |
| 0.00031032  | 0.001303628 | 0.000756072 | 0           | 0.000843109 | 0.000131626 | 0.000305122 | 0.000290014 | 9.30E-05    | 0.002466258 | 0.00014606  |
| 0.000269384 | 0           | 0.000153406 | 0           | 0.00277676  | 0           | 0.006801469 | 0.010611098 | 0           | 0.00012496  | 0.000619866 |
| 0.001521228 | 0           | 0.000547878 | 0           | 0.003896628 | 0.000410762 | 0           | 0.021128367 | 0           | 0.002960418 | 0.002092343 |
| 0.001897573 | 0           | 0.000127108 | 0.000243745 | 0.002355205 | 0.000696708 | 0.023980304 | 0.000390239 | 0           | 0.00046008  | 0.003875941 |
| 0.003671019 | 0           | 0           | 0           | 0.001673387 | 0           | 0           | 0.006408028 | 0           | 0.000349888 | 0.003056579 |
| 6.47E-05    | 0           | 0           | 0           | 0           | 0           | 0           | 0.001889355 | 0           | 1.00E-04    | 3.44E-05    |
| 0.010986646 | 0.004249124 | 0.009918783 | 0.002038417 | 0.010949413 | 0.005718902 | 0.036411188 | 0.015692739 | 0.000496258 | 0.002757074 | 0.012323689 |
| 0           | 0           | 0           | 0           | 0.000106305 | 0           | 0           | 0           | 0           | 0           | 0.000203059 |
| 0.000690627 | 0           | 0           | 0           | 0.018040689 | 7.26E-05    | 0           | 0.000371047 | 0           | 0.001817601 | 0.001680287 |
| 3.04E-05    | 0           | 0.001005904 | 0           | 0.001497434 | 0.000138434 | 0.000224402 | 0.000162067 | 0           | 0           | 0.000254121 |
| 0.001129036 | 8.74E-05    | 0.000425153 | 0           | 0.00192632  | 0.000388068 | 0.007531178 | 0.000769816 | 2.48E-05    | 0.001101921 | 0.001540164 |
| 0.003791185 | 2.11E-05    | 0.000918243 | 4.91E-05    | 0           | 0.000245096 | 0.000301893 | 0.000567233 | 0           | 0           | 3.68E-05    |
| 6.60E-05    | 6.76E-05    | 0.000221343 | 0           | 0           | 7.49E-05    | 0           | 0           | 0           | 0           | 0           |
| 0.000118846 | 0.000109928 | 0.000149023 | 0           | 3.85E-05    | 0           | 0.000255075 | 0.000168464 | 0           | 0           | 0           |
| 0.000216564 | 5.78E-05    | 0.000387898 | 0           | 0.000540689 | 6.58E-05    | 0.000182427 | 0.000100225 | 0           | 0.000105648 | 0           |
| 0.000998306 | 0.000287503 | 0.000499665 | 4.72E-05    | 0           | 0.000978114 | 0.001391613 | 0.001136599 | 1.49E-05    | 0.004161171 | 8.43E-05    |
| 0.000228448 | 0.000129658 | 0.000326535 | 3.54E-05    | 0           | 0.000780676 | 0.000747467 | 0.00083379  | 0           | 0.003114914 | 3.68E-05    |
| 0           | 0           | 0           | 3.15E-05    | 3.85E-05    | 0           | 0           | 0           | 3.10E-05    | 0           | 0           |
| 5.94E-05    | 3.81E-05    | 0           | 0           | 2.93E-05    | 0           | 0           | 9.38E-05    | 0           | 2.27E-05    | 0           |
| 0           | 0.000102881 | 0.000282705 | 0           | 0.000260264 | 0           | 0           | 0           | 0           | 0           | 0           |
| 0           | 7.05E-05    | 6.79E-05    | 0           | 0.000185117 | 0           | 4.04E-05    | 3.20E-05    | 0           | 0           | 0           |
| 0           | 0           | 0           | 0           | 2.57E-05    | 0           | 0           | 0           | 0           | 0           | 0           |
| 0           | 9.02E-05    | 8.77E-05    | 0           | 5.68E-05    | 0           | 0           | 2.99E-05    | 0           | 0           | 0           |
| 0           | 0           | 0           | 0           | 4.22E-05    | 0           | 0           | 0           | 7.57E-05    | 0           | 0           |
| 0           | 0.000432664 | 0.000587325 | 0.000163152 | 0.003480572 | 0.001084776 | 0.002547524 | 0.001821117 | 0.002163686 | 0           | 0           |
| 0.001323151 | 0.000139523 | 0.001196565 | 7.67E-05    | 0.006851173 | 0.000676283 | 0.000397143 | 0.000882837 | 0.000609157 | 2.84E-05    | 0.000191185 |
| 0.000805511 | 0.00029455  | 0.001339014 | 0.00010025  | 0.006013563 | 0.001016694 | 0.000429431 | 0.000995857 | 0.000547125 | 0           | 0.00017931  |
| 0           | 0           | 0           | 0           | 0.000826613 | 0.000254173 | 0.00022763  | 0.000142875 | 2.23E-05    | 0           | 0           |
| 0           | 7.33E-05    | 0           | 0           | 0.000137463 | 0           | 3.71E-05    | 2.99E-05    | 0.000106696 | 0           | 0           |
| 0           | 0           | 0           | 0           | 0.001995968 | 0.000138434 | 0.000287363 | 0.000424359 | 0.00099996  | 3.29E-05    | 9.02E-05    |
| 0           | 3.38E-05    | 0.0002323   | 0           | 0.002089443 | 0           | 0.000332566 | 0.000159934 | 0.000586825 | 3.41E-05    | 8.07E-05    |
| 0           | 0           | 0           | 0           | 0           | 0           | 0           | 0           | 0           | 0           | 0           |
| 0           | 0           | 0           | 0           | 0           | 0           | 0           | 0           | 0           | 0           | 0           |
| 0           | 0           | 0           | 0           | 0           | 0           | 0           | 0           | 0           | 0           | 0           |
| 0.00088078  | 0           | 0           | 0.001291456 | 0           | 0           | 0.003267547 | 0.000876439 | 0.000847361 | 3.41E-05    | 0           |
| 0.171889505 | 0.000467897 | 0.003534909 | 0.341310091 | 0.0025      | 5.45E-05    | 0.177858498 | 0.044425442 | 0.169676886 | 0.003719267 | 0.004797427 |
| 0.061677074 | 0.001282489 | 0.012787472 | 0.028195814 | 0.006427786 | 5.90E-05    | 0.029168987 | 0.015065797 | 0.041226651 | 0.003854451 | 0.005532479 |
| 0.027667332 | 0.01067566  | 0.046254049 | 0.011888475 | 0.000679985 | 0.133057525 | 0.064856924 | 0.048963307 | 6.08E-05    | 0.199586268 | 0.008768367 |
| 0.362697961 | 0.085743519 | 0.180666044 | 0.329669293 | 0.709215543 | 0.225855793 | 0.302790491 | 0.38405094  | 0.616621921 | 0.702588151 | 0.847279122 |
| 0.135604523 | 0.005562618 | 0.062813112 | 0.021439748 | 0.037162757 | 0.057547589 | 0.056445897 | 0.053609927 | 0.09467242  | 0.044994723 | 0.048831636 |
| 0.004225633 | 0.003216087 | 0.014648065 | 0.040485289 | 0.012426686 | 0.003599277 | 0.006042701 | 0.00393438  | 7.20E-05    | 0.006171893 | 0.001031922 |
| 0.000591589 | 0.000277638 | 0.000195045 | 0           | 0.000351906 | 0.000437995 | 0.000955725 | 0.000179126 | 0           | 0.000418048 | 0           |

| CCR14       | CCR15       | CCR16       | CCR17       | CCR18       | CCR19       | CCR20       | CCR21       | H002        | H003        | H004        |
|-------------|-------------|-------------|-------------|-------------|-------------|-------------|-------------|-------------|-------------|-------------|
| 0.000911792 | 0.000196108 | 0.000564359 | 0.000264667 | 0.002969023 | 0           | 0           | 0           | 0.007820432 | 0.002775576 | 0.000638766 |
| 0.000788974 | 0.002952319 | 0.002042164 | 0.017783584 | 0.007646137 | 0.001207165 | 0.006828542 | 5.77E-05    | 0.007055359 | 0.003512686 | 0.007219122 |
| 0           | 0.005706747 | 0.002557069 | 0           | 0           | 0.014712318 | 0           | 0           | 0.007581706 | 0.001469327 | 6.78E-05    |
| 0.000690185 | 0.004039828 | 0.004509052 | 0.002103763 | 0.001622605 | 0.004209986 | 0.00420932  | 5.02E-05    | 0.017300441 | 0.005117367 | 0.006020098 |
| 3.47E-05    | 7.49E-05    | 0.000744721 | 0           | 0           | 0.043337206 | 0.000256272 | 0           | 0.000894503 | 0.000345724 | 8.56E-05    |
| 0.000381805 | 0.001640177 | 0.001015264 | 0.003318517 | 0.006567688 | 0.012154638 | 0.000377346 | 0.000104175 | 0.008890385 | 0.009455224 | 0.005249297 |
| 3.07E-05    | 0.000454614 | 0.000142544 | 6.11E-05    | 9.37E-05    | 0.003613949 | 6.26E-05    | 0           | 0.00021284  | 0.002100436 | 0.001273963 |
| 6.01E-05    | 0.006172058 | 0.000337452 | 0           | 0           | 0.003779934 | 0           | 0           | 0.00257709  | 0.000957264 | 0.00074939  |
| 0.000287021 | 0.018266582 | 0.014885688 | 0           | 0           | 0.075417603 | 0           | 0           | 0.024329914 | 0.01598484  | 0.008435988 |
| 5.74E-05    | 0.005000758 | 0.002045073 | 0           | 0           | 0.002006911 | 0           | 0           | 0.003350792 | 0.001293203 | 0.002936894 |
| 0.000501953 | 0.000106968 | 0.002402888 | 0.009483899 | 0.000175906 | 0.001048724 | 0.002090535 | 0.000117197 | 0.004929835 | 0.000719171 | 0.003443624 |
| 0.026658247 | 0.039103964 | 0.155917185 | 0.179705473 | 0.058775467 | 0           | 0.076427607 | 0.087315717 | 0.107239724 | 0.089035332 | 0.221876472 |
| 0.000121483 | 0.000183629 | 0.000660358 | 0           | 0.0002729   | 0           | 0.00136813  | 0           | 0.000747816 | 0.000720802 | 0.000717273 |
| 0           | 0           | 0           | 0.001034916 | 7.23E-05    | 0           | 0.000159413 | 0           | 0.003416945 | 0.00046314  | 0.007861456 |
| 9.48E-05    | 0.000927057 | 0.000578904 | 0.001204574 | 0.000920627 | 0           | 0.00011502  | 0           | 0.006293161 | 0.003489855 | 0.003586365 |
| 6.41E-05    | 0.001600956 | 0.001070536 | 0.011146551 | 0.000984742 | 0.000611127 | 0.005652112 | 0           | 0.044595733 | 0.003297424 | 0.013574661 |
| 0.000304376 | 0.003383757 | 0.001684349 | 0.124977096 | 0.003412896 | 0           | 0.023417621 | 0.001343118 | 0.204404062 | 0.098356833 | 0.140000285 |
| 0.000256316 | 8.56E-05    | 0           | 0.000766856 | 0           | 0           | 0.000302684 | 0           | 0.015419395 | 0.018372293 | 0.001091968 |
| 0           | 0.00017828  | 0           | 0           | 0           | 0           | 0           | 0           | 0.000854236 | 6.52E-05    | 0           |
| 0.000122818 | 0.001305011 | 0.000101817 | 0.000373248 | 0           | 0.000626217 | 0.002306449 | 5.77E-05    | 0.003195476 | 0.00023157  | 0.000895699 |
| 0.001596638 | 0.004892007 | 0.005768677 | 0.005714092 | 0.000236733 | 0.001056269 | 0.008428729 | 0           | 0.033318089 | 0.001024126 | 0.008107684 |
| 0.000144178 | 0.000183629 | 0.000395633 | 0           | 0           | 0           | 0.000468151 | 0           | 0.002643243 | 0           | 0.00055669  |
| 0.000269666 | 8.91E-05    | 0.000991991 | 0           | 0           | 0           | 0           | 0           | 0.001351822 | 0.000205477 | 0.000371126 |
| 0.000204252 | 0.000201457 | 0.000389815 | 0           | 0           | 0           | 0           | 0           | 0.001121724 | 7.18E-05    | 0.000356852 |
| 7.74E-05    | 0.00096093  | 0.000293816 | 0           | 0           | 0           | 0           | 0           | 0.000422804 | 0.00200259  | 0.000399675 |
| 0           | 0.00017828  | 0           | 0           | 0           | 0           | 0           | 0           | 0.007233684 | 0.012075877 | 0.002212484 |
| 0           | 0.002916663 | 8.44E-05    | 0           | 0           | 0           | 0           | 0           | 0.000652901 | 0.000919756 | 0.000246228 |
| 6.27E-05    | 0           | 0           | 0           | 0           | 0           | 0           | 0           | 0.000480328 | 0.00170742  | 0.000110624 |
| 8.68E-05    | 0           | 0.000453814 | 8.14E-05    | 6.41E-05    | 0           | 0           | 0           | 0.003066047 | 0.007858697 | 0.000681588 |
| 7.48E-05    | 0           | 5.82E-05    | 0.000220556 | 0           | 0           | 0           | 0           | 0.001768873 | 0.005547891 | 0.000324736 |
| 6.81E-05    | 0           | 0.000142544 | 6.11E-05    | 0           | 0.001637217 | 0           | 0           | 0.004176266 | 0.014047482 | 0.000738684 |
| 0           | 0           | 7.85E-05    | 6.45E-05    | 0           | 0.000565858 | 0           | 0           | 0.001340317 | 0.005337521 | 0.000271208 |
| 0           | 0           | 0.000162908 | 0           | 0           | 0           | 0           | 0           | 0.001231021 | 0.003471916 | 0.000171289 |
| 0           | 0           | 9.31E-05    | 0           | 0           | 0           | 0           | 0           | 0.000514843 | 0.001872128 | 0.000235523 |
| 0.013102844 | 0.007254219 | 0.015682772 | 0.067954939 | 0.010865044 | 0.012184817 | 0           | 0.007835477 | 0.038411868 | 0.04160429  | 0.120237806 |
| 0.002321533 | 0.000360126 | 0.002810157 | 0.00264667  | 0.005055229 | 0.010404249 | 0.002508238 | 0.018463227 | 0.019707834 | 0.024011507 | 0.064797237 |
| 0.312128041 | 0.069955341 | 0.133197383 | 0.227128363 | 0.065627564 | 0           | 0.012153755 | 0.149242403 | 0.103279174 | 0.082781317 | 0.215224746 |
| 0.00180623  | 0.000449266 | 0.007176665 | 0.006341828 | 0.003483587 | 0           | 0.001816102 | 0.001371023 | 0.002864711 | 0.000908341 | 0.010063234 |
| 2.40E-05    | 0.000281683 | 0.001291625 | 0.000515761 | 0           | 0           | 0.001640545 | 0.025855959 | 0.000977914 | 0.000989879 | 0.000110624 |
| 0           | 0.000180063 | 0.000148362 | 0.000373248 | 0.000243309 | 0           | 0           | 0.000355312 | 0.00093477  | 0.000270708 | 0.000642334 |
| 0           | 0           | 0.001419624 | 0           | 0           | 0           | 0.004013584 | 0.000158123 | 0.004391982 | 0.091758724 | 0.000877857 |
| 0           | 0           | 0           | 0           | 0           | 0           | 0.000431829 | 0.0036573   | 0.002395888 | 0.072168244 | 0.000499593 |
| 7.88E-05    | 0           | 0           | 0           | 0           | 0           | 0.00015336  | 0.001863995 | 0.002277963 | 0.009851502 | 0.000128467 |
| 3.87E-05    | 0           | 7.56E-05    | 0.017400156 | 0           | 0           | 0           | 0.019951447 | 0.003949045 | 0.006924264 | 0.000453202 |
| 0.002531125 | 0           | 0.000136726 | 0           | 0.00246761  | 0           | 0.000793031 | 0.000306945 | 0.007095626 | 0.002281452 | 0.000517436 |
| 0           | 0           | 0.000232725 | 0           | 0           | 0           | 0           | 0           | 0.000120801 | 0           | 0.000674451 |
| 3.20E-05    | 9.63E-05    | 0.000485814 | 0.002354857 | 0           | 0           | 0           | 0.072480025 | 0.00404396  | 0.000456617 | 0.02024423  |
| 0.00071822  | 0.000103402 | 0           | 0.00318279  | 0           | 0           | 0           | 0.000961762 | 0.007918223 | 0           | 0.020640336 |



|             |             |             |             |             |             |             |             |             |             |             |
|-------------|-------------|-------------|-------------|-------------|-------------|-------------|-------------|-------------|-------------|-------------|
| 2.94E-05    | 0.000912794 | 0.001518532 | 0.009239591 | 0           | 0           | 0           | 0           | 0.021830482 | 0.000246247 | 0.004539161 |
| 0.000408504 | 0.378834583 | 0.001844348 | 6.79E-05    | 0           | 0           | 0.000421739 | 0           | 0.005162808 | 0.040399148 | 0.002776311 |
| 0.000305711 | 0.003562037 | 0.003066155 | 0.001326728 | 0.001953045 | 0           | 0.000149324 | 0.007749905 | 0.000543605 | 0.000120677 | 0.000139172 |
| 0.001579283 | 0.004107574 | 0.00274034  | 0.008632215 | 0.000697046 | 0.015972296 | 0.005680362 | 0.000773874 | 0.019664691 | 0.001751451 | 0.005188632 |
| 0           | 0.002492356 | 0.001623259 | 0.000251094 | 0.000151246 | 0.000550769 | 0.004473664 | 0.000645515 | 0.010012109 | 0.00033757  | 0.002622864 |
| 0           | 0           | 0.001178172 | 0           | 0.002607348 | 0           | 0.001154233 | 0           | 0.011263263 | 0.002261883 | 0.001248983 |
| 0.000153523 | 0.001934339 | 0.01615695  | 0.02610702  | 0.00085158  | 0           | 0.001640545 | 0           | 0.021401925 | 0.001079572 | 0.018449263 |
| 0           | 0.000247809 | 0.002079982 | 0.003613722 | 0.001325045 | 0.000241433 | 0.00011502  | 5.39E-05    | 0.002974008 | 0.002638591 | 0.003318726 |
| 0.046984677 | 0.001800629 | 0           | 0           | 5.92E-05    | 0           | 0.005819597 | 0           | 0.013690789 | 0           | 0.001391724 |
| 0           | 0           | 0           | 0           | 0           | 0           | 0.000119056 | 0           | 0.0010642   | 0           | 0.00021768  |
| 0.004087714 | 0.023409964 | 0.006862486 | 0.011489261 | 0.010001956 | 0           | 0.060482235 | 0.002929933 | 0.029023898 | 0.006444816 | 0.014556004 |
| 0           | 0.000561582 | 0           | 0.000156086 | 0.00028934  | 0           | 0           | 6.14E-05    | 0.001800511 | 0           | 0.000224817 |
| 0           | 0.00049027  | 0           | 0.000641308 | 0.000965015 | 0           | 0           | 0.007093228 | 0.001130353 | 0.00156065  | 0.000149878 |
| 3.20E-05    | 0.000565148 | 0.000401451 | 0           | 0.000106859 | 0           | 0.000306719 | 0           | 0.008136816 | 0.00029517  | 0.000178426 |
| 0.002368257 | 0.007081287 | 0.003156336 | 0.003518713 | 0.001846186 | 0           | 0.000278469 | 0.000146962 | 0.003402564 | 0.000242985 | 0.00021768  |
| 2.14E-05    | 0           | 0.001274171 | 0.000125547 | 0.000129874 | 0           | 0.006376534 | 0.006875576 | 0.000158192 | 0.000138616 | 0           |
| 0           | 0           | 0           | 0           | 0           | 0           | 0.000306719 | 0           | 7.48E-05    | 0           | 0           |
| 8.28E-05    | 0           | 0           | 0           | 0           | 0           | 0.000274433 | 0.000113477 | 0           | 0           | 0           |
| 1.87E-05    | 0           | 0           | 0           | 5.75E-05    | 0           | 0           | 0.000468789 | 0           | 0           | 0           |
| 0.00329874  | 0.000263855 | 8.73E-05    | 0           | 0.000716774 | 0           | 0.001150198 | 0.000872469 | 0           | 0           | 0           |
| 0.001931718 | 0.000354777 | 0           | 0           | 0.000484973 | 0           | 0.000744602 | 0.000917115 | 0           | 0           | 0           |
| 0           | 0           | 0           | 0           | 4.77E-05    | 0.000414963 | 5.65E-05    | 0           | 0           | 0           | 0           |
| 0           | 0           | 0           | 0           | 0           | 0           | 5.65E-05    | 0.000119058 | 0           | 0           | 0           |
| 0           | 0           | 0           | 0           | 6.90E-05    | 0.245054398 | 0           | 0           | 0           | 0           | 0           |
| 0           | 0           | 0           | 0           | 0           | 0.001478777 | 0           | 0           | 0           | 0           | 0           |
| 0           | 0           | 0           | 0           | 5.43E-05    | 0.443919663 | 0           | 0           | 0           | 0           | 0           |
| 0           | 0           | 0           | 0           | 0.00016111  | 0.012682772 | 6.05E-05    | 5.77E-05    | 0           | 0           | 0           |
| 0           | 0           | 0           | 0           | 0           | 0           | 0           | 0           | 0           | 0           | 0           |
| 9.75E-05    | 0.001725752 | 0           | 0           | 0.000593476 | 0           | 0.000213896 | 0           | 0           | 0           | 0           |
| 0.000847713 | 0.000171149 | 9.89E-05    | 5.77E-05    | 0.000231801 | 0           | 0.000159413 | 0.000783176 | 0           | 0           | 0           |
| 0.000865068 | 0           | 0.000247271 | 0           | 0.000212073 | 0           | 0.000106948 | 9.86E-05    | 0           | 0           | 0           |
| 0           | 0.000483139 | 6.40E-05    | 0           | 0           | 0           | 0           | 0           | 0           | 0           | 0           |
| 0           | 0.000203239 | 0.000203635 | 0           | 0           | 0.001825836 | 0           | 0           | 0           | 0           | 0           |
| 0           | 0.000197891 | 0           | 0           | 0           | 0           | 0           | 0           | 0           | 0           | 0           |
| 0           | 0.00019076  | 0.00034327  | 0           | 0           | 0           | 0           | 0           | 0           | 0           | 0           |
| 0           | 0           | 0           | 0           | 0           | 0.000203709 | 0           | 0           | 0.000293374 | 0.000998033 | 0.000189132 |
| 0           | 0           | 0           | 0           | 0           | 0           | 0           | 0           | 0           | 0           | 0           |
| 0           | 0           | 0           | 0           | 0           | 0           | 0           | 0           | 0           | 0           | 0           |
| 0           | 0           | 0           | 0           | 0           | 0           | 0           | 0           | 0           | 0           | 0           |
| 0.000829024 | 0.000106968 | 0.011208629 | 0.000206983 | 6.58E-05    | 0           | 0           | 0.002464864 | 0           | 0           | 0           |
| 0.033375875 | 0.014200012 | 0.231483071 | 0.019269791 | 0.002918059 | 0.008027644 | 0.081155525 | 0.159643199 | 0.002441908 | 0.006749771 | 0.005117262 |
| 0.047670858 | 0.035686334 | 0.065133977 | 0.039591463 | 0.005188392 | 0           | 0.018477824 | 0.077229307 | 0.001682587 | 0.001482373 | 0.003361548 |
| 0.192811391 | 0.142420866 | 0.031743723 | 0.001106172 | 0.069145674 | 0           | 0.188678826 | 0.052779716 | 0.002096762 | 0.022884642 | 0.002176799 |
| 0.240904103 | 0.077380708 | 0.064208894 | 0.167663126 | 0.680968171 | 0.008186084 | 0.362532211 | 0.256358884 | 0.089205848 | 0.241866518 | 0.033151577 |
| 0.049870907 | 0.080004992 | 0.170654511 | 0.015873231 | 0.041485761 | 0.001063814 | 0.077034992 | 0.026648436 | 0.018491194 | 0.019319772 | 0.004738998 |
| 0.004473523 | 0.038954209 | 0.018251477 | 0.004797937 | 0.004973031 | 0.071803655 | 0.02276786  | 0.003493596 | 0.005599993 | 0.001268742 | 0.000424654 |
| 0.000218937 | 0.002173235 | 0.001538896 | 0           | 8.55E-05    | 0           | 0.003224589 | 7.26E-05    | 5.18E-05    | 0           | 0           |

| H005        | H006        | H008        | H009        | H010        | H011        | H013        | H014        | H015        | H016        | H017        |
|-------------|-------------|-------------|-------------|-------------|-------------|-------------|-------------|-------------|-------------|-------------|
| 0.001944678 | 0.003367866 | 0.08751093  | 0.00331221  | 0.026536926 | 0.021913866 | 0.00361628  | 0.039506901 | 0.022294863 | 0.026502718 | 0.006979625 |
| 0.057907098 | 0.004597869 | 0.03695242  | 0.007353255 | 0.006546881 | 0.016299256 | 0.009857383 | 0.019145789 | 0.005054275 | 0.020061648 | 0.011543057 |
| 0.009251214 | 0.002789472 | 0.068099487 | 0.001989922 | 0.002658573 | 0.013671494 | 0.006774964 | 0.007975551 | 0.003578098 | 0.009704483 | 0.002253057 |
| 0.002631035 | 0.01708826  | 0.039641422 | 0.010353902 | 0.010402007 | 0.014151863 | 0.004598205 | 0.135012444 | 0.012906281 | 0.034568348 | 0.001481462 |
| 0.004410208 | 0.000926163 | 0.012682362 | 0.00294872  | 0.000778833 | 0           | 0.003085596 | 0.078611673 | 0.00543842  | 0.072080914 | 0.001759236 |
| 0.010322125 | 0.004865102 | 0.019529786 | 0.001923159 | 0.007458448 | 0.018277806 | 0.013311598 | 0.024284099 | 0.005638948 | 0.003773171 | 0.004514931 |
| 0.000547625 | 0.001526522 | 0.000959888 | 0.000268908 | 0.000769073 | 0.000630187 | 0.001391855 | 0.001510216 | 0.00059192  | 0.000619334 | 0.000154319 |
| 0.036099449 | 0.00055643  | 0.016998573 | 0.004727225 | 0.002047608 | 0.001015434 | 0.001124924 | 0.003342135 | 0.001236993 | 0.005550183 | 0.001962055 |
| 0.056595232 | 0.022140059 | 0.037882723 | 0.00888696  | 0.028836338 | 0.024101686 | 0.027414455 | 0.03676349  | 0.006723733 | 0.040056598 | 0.014453072 |
| 0.001662347 | 0.001391075 | 0.008800074 | 0.001060797 | 0.002170582 | 0.020068488 | 0.001849451 | 0.00300256  | 0.005399764 | 0.009313826 | 0.005312981 |
| 0.005778054 | 0.008591719 | 0.002317539 | 0.007955981 | 0.001458116 | 0.004801313 | 0.002243492 | 0.003485115 | 0.00267693  | 0.015459522 | 0.003743337 |
| 0.361907196 | 0.104758941 | 0.053582817 | 0.303360243 | 0.038607861 | 0.022693872 | 0.281342155 | 0.06001546  | 0.288444022 | 0.13703949  | 0.169711159 |
| 0.001168267 | 0.001947505 | 0.000601574 | 0.000580471 | 0.000236187 | 0.000813298 | 0.001728696 | 0.0007283   | 0.001386785 | 0.001219611 | 0.001097869 |
| 0.001623404 | 0.000120804 | 0.000302431 | 0.006479766 | 4.68E-05    | 0.000145062 | 0.004413896 | 0.004637883 | 0.001611473 | 0.003215771 | 0.003928519 |
| 0.002752729 | 0.002635721 | 0.004132123 | 0.006196021 | 0.002238901 | 0.006075955 | 0.011601968 | 0.010321301 | 0.006846949 | 0.024882922 | 0.004960252 |
| 0.031083203 | 0.031130798 | 0.001574612 | 0.048668718 | 0.011202311 | 0.001688426 | 0.040500432 | 0.00365937  | 0.014123946 | 0.02974231  | 0.009122454 |
| 0.107611989 | 0.02224622  | 0.191155877 | 0.102804622 | 0.200808112 | 0.214579915 | 0.181967536 | 0.172030615 | 0.123278901 | 0.161064873 | 0.074231822 |
| 0.007457437 | 0.005816891 | 0.091577307 | 0.002056686 | 0.013665687 | 0.005583696 | 0.001306056 | 0.012885988 | 0.005651028 | 0.00263455  | 0.001653417 |
| 0.001102552 | 0.001248307 | 0.000644309 | 0.001034834 | 0.00029865  | 0           | 0.001379144 | 0.0018766   | 0.000649904 | 0.000190564 | 0           |
| 0.007893104 | 0.001054289 | 0.013122859 | 0.00412079  | 0.001198505 | 0.000741956 | 0.008840502 | 0.020781112 | 0.002215474 | 0.003696946 | 0.001300688 |
| 0.028444866 | 0.016110847 | 0.067688575 | 0.024554122 | 0.018449947 | 0.001074885 | 0.008633949 | 0.152630144 | 0.011908472 | 0.084967818 | 0.012486607 |
| 0.00188383  | 0.001500897 | 0.006166955 | 0.002269958 | 0.001700159 | 0           | 0.000263753 | 0.010991515 | 0.000674064 | 0.00633626  | 0.000727504 |
| 0.002297592 | 0.000904199 | 0.00272845  | 0.001105306 | 0.003128995 | 0.000299636 | 0.004725315 | 0.003297455 | 0.005049443 | 0.004140008 | 0.000599639 |
| 0.000666886 | 0.000765091 | 0.001554888 | 0.00076778  | 0.001665024 | 0           | 0.001633364 | 0.001845323 | 0.001770929 | 0.002062858 | 0.000634912 |
| 5.60E-05    | 0.001087235 | 0.000410911 | 0.002095631 | 0.007128566 | 0.003876246 | 0.000130288 | 0           | 4.35E-05    | 0           | 0           |
| 0.001134192 | 0.021104074 | 0.002738312 | 0.007017583 | 0.062111438 | 0.009062805 | 0           | 0           | 0.000246432 | 0.000133395 | 0.000599639 |
| 0           | 0.000893217 | 3.94E-05    | 0.001175779 | 0.004811587 | 0.000242563 | 0           | 0           | 0           | 0           | 0           |
| 0           | 0.001233664 | 0.000210387 | 0.001667232 | 0.004497321 | 0.005987967 | 0           | 0.000192128 | 5.56E-05    | 0           | 0           |
| 0.000104657 | 0.007943771 | 0.000578563 | 0.012775933 | 0.023905681 | 0.034753038 | 0           | 0.00056298  | 0.000304416 | 0.00080037  | 0.000171955 |
| 0           | 0.004777245 | 0.000818535 | 0.007711181 | 0.015264344 | 0.022344296 | 0           | 0.000612129 | 6.52E-05    | 0.000157215 | 0.000158728 |
| 0.000216616 | 0.008749131 | 0.000578563 | 0.019220462 | 0.036987732 | 0.054947564 | 0           | 0.000920428 | 6.28E-05    | 0.000171508 | 0.000163137 |
| 4.87E-05    | 0.00399385  | 0.00054569  | 0.007056528 | 0.013402173 | 0.017921096 | 0           | 0           | 6.52E-05    | 0           | 0           |
| 4.87E-05    | 0.004850459 | 0.000539115 | 0.006642966 | 0.01154976  | 0.019714157 | 0           | 0.00021     | 0           | 0           | 0.000114637 |
| 0.000104657 | 0.001200718 | 0.000187375 | 0.003336319 | 0.005807088 | 0.006618154 | 0           | 0           | 0           | 0           | 0           |
| 0.043561754 | 0.011242084 | 0.003500963 | 0.069725176 | 0.021688252 | 0.006784619 | 0.023229357 | 0.004754054 | 0.105170968 | 0.002925161 | 0.074024594 |
| 0.001506578 | 0.010422081 | 0.040499405 | 0.054658885 | 0.027825221 | 0.026018406 | 0.013362442 | 0.01712621  | 0.041818573 | 0.019842499 | 0.047151052 |
| 0.010577684 | 0.090518725 | 0.035197007 | 0.037741763 | 0.077112267 | 0.027345366 | 0.060755415 | 0.046941812 | 0.104260136 | 0.026355031 | 0.16468918  |
| 0.004154649 | 0.002968847 | 0.001117678 | 0.002592648 | 0.000681235 | 0.001127203 | 0.000368619 | 0.00084447  | 0.001514833 | 0           | 0.002067874 |
| 0.000253125 | 0.008514844 | 0.000355027 | 0.001146106 | 0.001823133 | 0.006325652 | 0.000908837 | 0.000196596 | 0.000251264 | 0.000524052 | 0.002649877 |
| 0.000160637 | 0.004345279 | 4.27E-05    | 0.005331805 | 0           | 0.002537395 | 0.000406752 | 0           | 0           | 0           | 0           |
| 0           | 0           | 0.009529852 | 0.000204    | 0           | 0.015497848 | 0.004642694 | 0           | 0.000599168 | 0.001524514 | 0.000458548 |
| 7.06E-05    | 0.028334004 | 0.001676518 | 0.003328901 | 0.002449713 | 0.003714537 | 0.003247661 | 0           | 0.001727441 | 0.000138159 | 0.000573185 |
| 0           | 0.03534063  | 0.00012163  | 0.00280592  | 0.000238139 | 0.004784666 | 0.000133466 | 0.000370852 | 0.000123216 | 0.000176272 | 0.000308638 |
| 0.000116827 | 0.008588059 | 0.000887568 | 0.00070658  | 0           | 0.002237759 | 0.000517973 | 0.000160851 | 0.001217665 | 0.001919934 | 0.007821766 |
| 3.89E-05    | 0.011732621 | 0.000371464 | 0.002970975 | 0.000696851 | 0.00058976  | 0.001283811 | 0.001268939 | 0.000613664 | 0.002443986 | 0.005842074 |
| 0           | 0.003247062 | 0.002974997 | 0.005546932 | 0.007083671 | 0.000485125 | 0.000934259 | 0.02414112  | 0.021840655 | 0.016217015 | 0.010621553 |
| 0.001781607 | 0.013420215 | 0.001252457 | 0.024368668 | 0.000316218 | 0.009371953 | 0.010267312 | 0.004092776 | 0.021449263 | 0           | 0.012517471 |
| 0.001343507 | 0.016623348 | 0.00066732  | 0.019422607 | 0.00258635  | 0.000242563 | 0.002392846 | 0.001872132 | 0.018975277 | 0.000171508 | 0.010528961 |

|             |             |             |             |             |             |             |             |             |             |             |
|-------------|-------------|-------------|-------------|-------------|-------------|-------------|-------------|-------------|-------------|-------------|
| 0.0027722   | 0.01117253  | 0.000348453 | 0.00955274  | 0.000569973 | 0.000513662 | 0.007280227 | 0.00720257  | 0.006851781 | 0           | 0.000987641 |
| 0.000586567 | 0.017622726 | 0.000332016 | 0.00262603  | 0.001944154 | 0.043998954 | 0.00193525  | 0.000795321 | 0.008040454 | 0.002172432 | 0.002314784 |
| 0.000226352 | 0.002573489 | 6.90E-05    | 0.000276327 | 5.08E-05    | 0.000834701 | 0           | 0.000178724 | 0.000504944 | 0.00016198  | 0.000850959 |
| 0.051476762 | 0.01425486  | 0.000542403 | 0.023671361 | 0.003374943 | 0.005835771 | 0.00747407  | 0.00035298  | 0.014324474 | 0.003901802 | 0.002332421 |
| 0.001635574 | 0.001076253 | 0.00179486  | 0.000903161 | 0.001460068 | 0.010515802 | 0.002262558 | 0           | 0.001287729 | 0.00053358  | 0.00477066  |
| 0.002146691 | 0.038071531 | 0           | 0.000721416 | 0           | 0.002808494 | 0.002793243 | 0           | 8.46E-05    | 0.001762719 | 0.006939943 |
| 0.005902182 | 0.061957755 | 0.00073964  | 0.007399618 | 0.004091313 | 0.007750113 | 0.04886745  | 0           | 0.000968817 | 0.01104796  | 0.033482802 |
| 0.002526377 | 0.015137094 | 0.000124917 | 0.006385184 | 0.002799114 | 0.002116478 | 0.007763245 | 0.000772981 | 0.001314305 | 0.001900878 | 0.009810276 |
| 0.00360459  | 0.042328953 | 0           | 0.001231415 | 0           | 0.004794178 | 0.011265126 | 0.001233194 | 0.000442128 | 0.01166253  | 0.037063002 |
| 0           | 0.001500897 | 0           | 5.19E-05    | 0           | 0.001008299 | 0.000260576 | 0           | 0           | 0.000309667 | 0.001269824 |
| 0.026222725 | 0.04716843  | 0.005798778 | 0.021139912 | 0.041988659 | 0.022674847 | 0.028399558 | 0.005187459 | 0.020183278 | 0.025306927 | 0.054624498 |
| 0.000304236 | 0.001025003 | 0.000128204 | 4.08E-05    | 0.000341593 | 0           | 0.000937436 | 0.000361916 | 0           | 0.00082419  | 0.001031732 |
| 4.14E-05    | 0.006380642 | 0.000381326 | 0.000139091 | 0.001087243 | 0.010092507 | 0           | 0.000138511 | 0.005677604 | 0.000352544 | 0.030021649 |
| 0.00035048  | 0.019204159 | 0           | 0.00028189  | 0.001356614 | 0.001600438 | 0.00209096  | 0           | 0.000297168 | 0.000338251 | 0.005753892 |
| 0.000693659 | 0.006765018 | 0.00050953  | 0           | 0.002771786 | 0.001881049 | 0.001903473 | 0.000603193 | 0.00027784  | 0.00335393  | 0.006666578 |
| 0.000404026 | 0.000230626 | 5.26E-05    | 4.08E-05    | 0           | 0           | 0.000680039 | 0.001134896 | 0.000584672 | 0.00244875  | 0.000145501 |
| 0.000153335 | 0           | 0           | 0           | 0           | 0           | 0           | 0.001907877 | 0.000188448 | 0.000967113 | 0           |
| 0.000170372 | 0           | 0           | 0           | 0           | 0           | 0           | 0           | 0.000173952 | 0.000147687 | 0.000114637 |
| 0.000104657 | 0           | 0           | 0           | 0           | 0           | 0.000149354 | 0           | 0           | 0.000171508 | 0           |
| 5.60E-05    | 0           | 0           | 0           | 0           | 0           | 0           | 0           | 6.52E-05    | 0           | 0           |
| 0           | 0           | 0           | 0           | 0           | 0           | 0           | 0           | 7.49E-05    | 0           | 0.000220456 |
| 0           | 0           | 0           | 0           | 0           | 0           | 0.000130288 | 0           | 0           | 0.000152451 | 0           |
| 0.00137028  | 0           | 0.000190663 | 0           | 0           | 0           | 0.008675259 | 0.006259802 | 0.002396674 | 0.00551207  | 0.002389739 |
| 0.000486778 | 0           | 0.000335304 | 0           | 0           | 0           | 0.009008923 | 0.014695566 | 0.001526913 | 0.051023568 | 0.000141092 |
| 0.00040646  | 0           | 0.000233398 | 0           | 0           | 0           | 0.005888372 | 0.00689874  | 0.000785201 | 0.002567853 | 0           |
| 0           | 0           | 0           | 0           | 0           | 0           | 0.001849451 | 0.010928962 | 0           | 0.003468269 | 0           |
| 0           | 0           | 0.000138066 | 0           | 0           | 0           | 0.000142999 | 0.000201064 | 0.00019328  | 0.000781313 | 0           |
| 0           | 0           | 0           | 0           | 0           | 0           | 0           | 0           | 0           | 0           | 0           |
| 7.79E-05    | 0           | 0           | 0           | 0           | 0           | 0           | 0           | 3.62E-05    | 0.000276318 | 0.000123455 |
| 0           | 0           | 0           | 0           | 0           | 0           | 0.000279642 | 0           | 0.000376896 | 0           | 0.000590821 |
| 0.00013143  | 0           | 0           | 0           | 0           | 0           | 0.000263753 | 0           | 0.000285088 | 0.000166744 | 0.000304229 |
| 0.000389422 | 0           | 0           | 0           | 0           | 0           | 0.000136643 | 0.000772981 | 0           | 0.000343016 | 0           |
| 0.000386988 | 0           | 0           | 0           | 0           | 0           | 0.000556106 | 0.000218937 | 0.000154624 | 0           | 0           |
| 0.000119261 | 0           | 0           | 0           | 0           | 0           | 0.000521151 | 0           | 7.73E-05    | 0.000447826 | 0.000665776 |
| 0.000111959 | 0           | 0           | 0           | 0           | 0           | 0.000120755 | 0           | 5.56E-05    | 0           | 0.000185183 |
| 0.000141166 | 0.000885895 | 7.23E-05    | 4.82E-05    | 0.002670284 | 0.0007372   | 0           | 0           | 5.07E-05    | 0           | 0.00019841  |
| 0           | 0           | 0           | 0           | 0           | 0           | 0           | 0           | 0           | 0           | 0           |
| 0           | 0           | 0           | 0           | 0           | 0           | 0           | 0           | 0           | 0           | 0           |
| 0           | 0           | 0           | 0           | 0           | 0           | 0           | 0           | 0           | 0           | 0           |
| 0           | 0           | 0           | 0           | 0           | 0           | 0           | 0           | 0           | 0           | 0           |
| 0.001158531 | 0.028037486 | 0.0021466   | 0.003996536 | 0.003460829 | 0.004430335 | 0           | 0.000433405 | 0.00051944  | 0.000419241 | 0.004365022 |
| 0.000535456 | 0.018468353 | 0.000594999 | 0.002049268 | 0.000134685 | 0.018858053 | 0.000146177 | 0           | 0.000309248 | 0.000247733 | 0.003681609 |
| 0.02096309  | 0.008580737 | 0.006525269 | 0.007423727 | 0.011770332 | 0.003326913 | 0.004741204 | 0.000951704 | 0.004418867 | 0.003082376 | 0.012177969 |
| 0.061718569 | 0.071962514 | 0.089338663 | 0.052337    | 0.181909214 | 0.127968419 | 0.086749415 | 0.020173451 | 0.059846777 | 0.07697365  | 0.08393187  |
| 0.004025653 | 0.023300509 | 0.018297053 | 0.005168606 | 0.024784064 | 0.031968324 | 0.010280023 | 0.005598524 | 0.007158613 | 0.012186581 | 0.011296147 |
| 0.000233653 | 0.002774829 | 0.000203812 | 0.000484035 | 0.002338451 | 0.025126632 | 0.000139821 | 0.000388724 | 0.004863411 | 0.002486863 | 0.003809473 |
| 4.38E-05    | 0.000307501 | 5.26E-05    | 0           | 0.00021862  | 0           | 0.000120755 | 0           | 4.59E-05    | 0.000114339 | 0.002663104 |

| H018        | H019        | H020        | H021        | H023        | H024        | H025        | H026        | H027        | H028        | H029        |
|-------------|-------------|-------------|-------------|-------------|-------------|-------------|-------------|-------------|-------------|-------------|
| 0.003985903 | 0.074894103 | 0.014487711 | 0.000201361 | 0.011034198 | 0.035796108 | 0.053997596 | 0.032220399 | 0.011790572 | 0.015421231 | 0.054857079 |
| 0.005348043 | 0.024437667 | 0.010189644 | 0.012966753 | 0.010045321 | 0.030916953 | 0.003697575 | 0.019448329 | 0.013028349 | 0.017866681 | 0.00681656  |
| 0.003161233 | 0.026908141 | 0.007260092 | 0.008165072 | 0.004727824 | 0.02007178  | 0.001260489 | 0.019342997 | 0.001981777 | 0.008335604 | 0.007177536 |
| 0.008416963 | 0.048944774 | 0.005775601 | 0.003996238 | 0.010945487 | 0.018109171 | 0.012909004 | 0.050727463 | 0.017205428 | 0.043829146 | 0.027856673 |
| 0.001624722 | 0.011073067 | 0.00014381  | 0.000267744 | 0.001150646 | 0.006528997 | 0.001463929 | 0.009878801 | 0.001931732 | 0.006951182 | 0.003783247 |
| 0.005668064 | 0.016534819 | 0.005562205 | 0.011333739 | 0.01140731  | 0.025341893 | 0.003762592 | 0.017680095 | 0.001227768 | 0.015719191 | 0.006830551 |
| 0.000207193 | 0.002697491 | 0.000668021 | 0.000743486 | 0.000913211 | 0.002830535 | 0.000308306 | 0.00038547  | 0.000243552 | 0.001344452 | 0.003478237 |
| 0.000352844 | 0.007982971 | 0.004126423 | 0.003589091 | 0.000868855 | 0.013574059 | 0.00147861  | 0.005405551 | 0.002081867 | 0.003034102 | 0.002607978 |
| 0.015802063 | 0.033478268 | 0.020578766 | 0.01869558  | 0.010830683 | 0.029290568 | 0.016663206 | 0.024407899 | 0.031514925 | 0.027067095 | 0.020953367 |
| 0.0044167   | 0.017106367 | 0.003627727 | 0.004441002 | 0.002014283 | 0.002861812 | 0.00277056  | 0.003948831 | 0.003806747 | 0.006791301 | 0.0017685   |
| 0.004943914 | 0.00583032  | 0.000904612 | 0.008439453 | 0.001860341 | 0.004308356 | 0.007013438 | 0.001362593 | 0.001424611 | 0.004124198 | 0.002196634 |
| 0.175792052 | 0.149809573 | 0.139581652 | 0.183554793 | 0.159991964 | 0.005997295 | 0.175147179 | 0.121279762 | 0.060023821 | 0.125935212 | 0.038800666 |
| 0.001698573 | 0.000697074 | 0.000781678 | 0.001498036 | 0.000910602 | 0           | 0.001801598 | 0.000437016 | 0           | 0.001824095 | 0           |
| 0.004154119 | 0.001180486 | 0.002931871 | 0.002091055 | 0.002950976 | 0.004214526 | 0.000216024 | 0           | 0           | 0.00583565  | 7.56E-05    |
| 0.004591071 | 0.01063773  | 0.004986964 | 0.002515904 | 0.007824914 | 0.014598369 | 0.005163601 | 0.00337959  | 0.000343641 | 0.003920714 | 0.001214445 |
| 0.041559651 | 0.032706411 | 0.012819978 | 0.027081927 | 0.019887127 | 0.001329257 | 0.009949685 | 0.007991789 | 0.000567175 | 0.041361894 | 0.007160746 |
| 0.094307729 | 0.248008931 | 0.200724154 | 0.059529789 | 0.120478627 | 0.360119164 | 0.072271544 | 0.348626649 | 0.087815408 | 0.108769826 | 0.245689981 |
| 0.003770504 | 0.050710161 | 0.012694724 | 0.009220557 | 0.028051234 | 0.000633352 | 0.000553692 | 0.032619317 | 0.015440512 | 0.087792736 | 0.035028612 |
| 0.000592859 | 0.000654342 | 0.000554365 | 0.000628423 | 0.000647075 | 0           | 0.000119547 | 0.001891495 | 0           | 0.001765956 | 0.000548459 |
| 0.004911092 | 0.001468931 | 0.004321263 | 0.004000664 | 0.002966631 | 0           | 0.006040281 | 0.010129805 | 0.000767355 | 0.003306626 | 0.000352581 |
| 0.038525606 | 0.022958053 | 0.037388315 | 0.025019638 | 0.014371332 | 0.044397182 | 0.036417862 | 0.048504285 | 0.008704472 | 0.048523828 | 0.031958922 |
| 0.00392436  | 0.001898927 | 0.003126711 | 0.001810035 | 0.000761879 | 0.002752344 | 0.003567541 | 0.004975258 | 0.000587193 | 0.00293236  | 0.00189722  |
| 0.00115905  | 0.001901598 | 0.002368228 | 0.002814626 | 0.001388081 | 0.000703724 | 0.000950086 | 0.001550846 | 0.000500449 | 0.00305227  | 0.000615617 |
| 0.000953909 | 0.000990861 | 0.000767761 | 0.001692759 | 0.000641857 | 0.011212673 | 0.001159818 | 0.001846672 | 0.0086244   | 0.002696172 | 0.008853693 |
| 0.000182576 | 0.000117514 | 0.000702814 | 0.00047353  | 0.000198297 | 0           | 7.55E-05    | 0.001869083 | 0.006719358 | 0           | 0.00118926  |
| 0.002695562 | 0.001196511 | 0.003405053 | 0.003389943 | 0.001067152 | 0.000297128 | 0.001065438 | 0.003803159 | 0.006435771 | 0.001438927 | 0.007642047 |
| 0.000131291 | 0.00017093  | 3.94E-05    | 0.00025668  | 8.09E-05    | 0           | 0.000318793 | 0.000378747 | 0.000713974 | 0.000221653 | 0.000537266 |
| 0.000346689 | 0           | 0.000322413 | 0.000154893 | 0.000101758 | 0           | 3.57E-05    | 0.000663368 | 0.002575643 | 0           | 0.000990584 |
| 0.003493563 | 0.00027242  | 0.002101484 | 0.000274382 | 0.0002844   | 0.000218936 | 0.000132131 | 0.003092728 | 0.015730772 | 0.000152614 | 0.004799015 |
| 0.001522151 | 0.000189626 | 0.000783997 | 0.000227914 | 0           | 0.001290161 | 0.000448826 | 0.002597443 | 0.010092383 | 0.000290692 | 0.001941992 |
| 0.00451722  | 0.000619622 | 0.002556109 | 0.000838635 | 0           | 0           | 0.000113255 | 0.006122705 | 0.021205681 | 0           | 0.006066627 |
| 0.001351884 | 0.000146893 | 0.000719051 | 0.000278807 | 0           | 0           | 0.000161494 | 0.001340182 | 0.00560169  | 0           | 0.001376744 |
| 0.001622671 | 4.27E-05    | 0.000902293 | 8.41E-05    | 0.000101758 | 0.000320585 | 0.000123742 | 0.0021044   | 0.006592578 | 0           | 0.002123879 |
| 0.000902623 | 0           | 0.000394318 | 3.10E-05    | 0           | 0           | 9.86E-05    | 0.000813522 | 0.003232899 | 0           | 0.000968198 |
| 0.082844412 | 0.002681466 | 0.036755087 | 0.018958898 | 0.050299664 | 0.003839207 | 0.0739494   | 0.00117434  | 0.152670228 | 0.035802402 | 0.031021505 |
| 0.074078709 | 0.036477557 | 0.058222228 | 0.010019362 | 0.028160819 | 0.042778616 | 0.04085579  | 0.007279116 | 0.114509343 | 0.061070838 | 0.030654933 |
| 0.125870826 | 0.038814493 | 0.066308069 | 0.017414394 | 0.075791297 | 0.053373576 | 0.163947492 | 0.018249337 | 0.11688147  | 0.096397231 | 0.141452017 |
| 0.002262713 | 0.000483412 | 0.002623375 | 0.000814294 | 0.004633894 | 0           | 0.008259246 | 0.001266226 | 0.000470422 | 0.003015934 | 0.004194591 |
| 0.003339706 | 0.000811918 | 0.003075681 | 0.019983404 | 0.013460731 | 0.02387971  | 0.000914431 | 4.93E-05    | 0.00273245  | 0.001079196 | 0.002392512 |
| 8.00E-05    | 0           | 0           | 0.000294297 | 0.001030624 | 0.000328405 | 0.000197148 | 0           | 0           | 0.00014898  | 0.000291019 |
| 7.18E-05    | 0.001687935 | 0.006037706 | 0.008156221 | 0.020437663 | 0.008350861 | 0.007405636 | 0.021823903 | 0.00120775  | 0.051993968 | 0.000363774 |
| 0.001513946 | 0.000635646 | 0.006877372 | 0.004593683 | 0.015662874 | 0           | 0.00317744  | 0.001521712 | 0.000160144 | 0.002340074 | 0.005445413 |
| 8.82E-05    | 0.000590243 | 0.000607714 | 0.000913868 | 0.010517582 | 0           | 0.003838095 | 0.000443739 | 0.00049044  | 0.000959285 | 0.000397353 |
| 0.0014483   | 0.000673037 | 0.006478415 | 0.004020579 | 0.001755974 | 0.016013637 | 0.001256295 | 0.000172565 | 0.000483767 | 0.000861176 | 0.005526562 |
| 0.000418489 | 0.000315152 | 0.001561036 | 0.001960502 | 0.021601355 | 0.004519474 | 0.000786495 | 0.00010085  | 0.000733991 | 0.00168965  | 0.000794706 |
| 0.001452403 | 0.003685681 | 0.009036843 | 0.001305526 | 0.003741556 | 0.02852429  | 0.063276139 | 0.000712672 | 0.003242908 | 0.008837049 | 0.001063339 |
| 0.068160372 | 0.001492968 | 0.002154832 | 0.009824639 | 0.049334269 | 0.012002408 | 0.016541562 | 0.000782146 | 0           | 0.004167802 | 0.000352581 |
| 0.01307573  | 0.000723782 | 0.004103228 | 0.005352658 | 0.008169325 | 0.005559422 | 0.007132985 | 0.018926151 | 0.113268231 | 0.028320706 | 0.002305766 |

|             |             |             |             |             |             |             |             |             |             |             |
|-------------|-------------|-------------|-------------|-------------|-------------|-------------|-------------|-------------|-------------|-------------|
| 0.015681029 | 5.88E-05    | 0.001122647 | 0.004485258 | 0.016080342 | 0           | 0.010027286 | 0.006635919 | 0.001821633 | 0.000170782 | 0.00057924  |
| 0.002133473 | 0.002299544 | 0.082607324 | 0.013035349 | 0.017687593 | 0.000304947 | 0.003282306 | 0.002709499 | 0.003653276 | 0.001914936 | 0.027982595 |
| 0.000557985 | 0.000178942 | 0.000296898 | 0.000462466 | 0.000112194 | 0.001642023 | 0.000297819 | 9.19E-05    | 0.000223534 | 0.000272524 | 0.000226659 |
| 0.002631968 | 0.013193669 | 0.018294041 | 0.01879958  | 0.003903325 | 0.001102501 | 0.002634234 | 0.035503622 | 0.001514692 | 0.000265257 | 0.000461713 |
| 0.000190782 | 0.000117514 | 0.001906644 | 0.020746805 | 0.008445897 | 0           | 0.0005474   | 0.001086937 | 0           | 0.000250722 | 0.000814294 |
| 0.000100519 | 0.000841297 | 0.000899973 | 0.007140565 | 0.002997941 | 0.003659366 | 0.002330122 | 4.71E-05    | 0           | 0.000628622 | 0.001166874 |
| 0.015865657 | 0.001546383 | 0.003001457 | 0.038327156 | 0.018598195 | 0.00194697  | 0.009599433 | 0.004092262 | 0.000113435 | 0.008851583 | 0.00131798  |
| 0.019683343 | 0.001711972 | 0.005035674 | 0.008012391 | 0.008211072 | 0           | 0.013401874 | 0.010134287 | 0           | 0.002608964 | 0.001494271 |
| 6.56E-05    | 0.006540748 | 0.011504811 | 0.1130962   | 0.004372976 | 0.001282342 | 0.015310435 | 0.000407882 | 0.000140126 | 0.001780491 | 0.020267793 |
| 0           | 0           | 0.000155408 | 0.004429939 | 0           | 0           | 0.001002519 | 6.50E-05    | 0           | 0           | 0.000540064 |
| 0.016741612 | 0.013482114 | 0.018952784 | 0.048771367 | 0.024160955 | 0.004519474 | 0.025293677 | 0.010766279 | 0.003893491 | 0.009803601 | 0.015186154 |
| 0.000268736 | 0.000224346 | 0.002075969 | 0.003710793 | 0.000401813 | 0           | 0.001501681 | 8.07E-05    | 0           | 0.00033793  | 0.001130497 |
| 0.002032954 | 0.001001544 | 0.001558716 | 0.036078995 | 0.00101236  | 0.007748786 | 0.000218121 | 0.000318237 | 0.001367893 | 0.00162061  | 0.000380563 |
| 6.77E-05    | 0           | 0.001844017 | 0.009605576 | 0.003110136 | 0.000875746 | 0.006514275 | 0           | 0.000243552 | 0.000897513 | 0.004435241 |
| 0.001282135 | 0.000253724 | 0.002419258 | 0.002394203 | 0.004114668 | 0           | 0.001726094 | 0.00054683  | 0.000503785 | 0.001537036 | 0.009737943 |
| 0           | 5.61E-05    | 0.000215715 | 0           | 0.000874073 | 0.000336224 | 0.000115353 | 0           | 0           | 0           | 0           |
| 0           | 9.35E-05    | 0           | 4.20E-05    | 0           | 0.001907875 | 0           | 0           | 0           | 0.00014898  | 0           |
| 0           | 0           | 0           | 0           | 0           | 0.000289309 | 0           | 0           | 0           | 0           | 0           |
| 0           | 8.28E-05    | 0           | 0           | 0           | 0           | 0           | 0           | 0           | 0           | 0           |
| 0           | 0           | 0           | 0           | 8.35E-05    | 0           | 0           | 0           | 0           | 0           | 0           |
| 0           | 0           | 0           | 0           | 0           | 0           | 0           | 0           | 0           | 0           | 0           |
| 0           | 0           | 0           | 0           | 0.000109585 | 0           | 0           | 0           | 0           | 0.000116277 | 0           |
| 0           | 0.00371773  | 0           | 0.000139404 | 0.00157855  | 0.033528552 | 0.000545303 | 0           | 0           | 0.000559583 | 0           |
| 0           | 0.00163719  | 0           | 0           | 0.001662044 | 0.000297128 | 5.03E-05    | 0           | 0           | 0.000817572 | 0           |
| 0           | 0.000387264 | 0           | 0           | 0.000769706 | 0.000562979 | 4.61E-05    | 0           | 0           | 0.000585018 | 0           |
| 0           | 0.000830614 | 0           | 0           | 0           | 0.000312766 | 0           | 0           | 0           | 0           | 0           |
| 0           | 9.08E-05    | 0           | 0           | 0.000120022 | 0.003104206 | 4.19E-05    | 0           | 0           | 0           | 0           |
| 0           | 0           | 0           | 0           | 0           | 0           | 0           | 0           | 0           | 0           | 0           |
| 0           | 6.14E-05    | 0           | 0           | 0           | 0           | 0           | 0           | 0           | 0           | 0           |
| 0           | 0           | 0           | 0           | 0           | 0.000297128 | 3.36E-05    | 0           | 0           | 0           | 0           |
| 0           | 0           | 0           | 0           | 0.000164378 | 0           | 0           | 0           | 0           | 0           | 0           |
| 0           | 5.34E-05    | 0           | 0           | 0           | 0           | 0           | 0           | 0           | 0           | 0           |
| 0           | 0.000141552 | 0           | 0           | 0           | 0.000562979 | 2.94E-05    | 0           | 0           | 0           | 0           |
| 0           | 0           | 0           | 0           | 6.00E-05    | 0.000453511 | 0           | 0           | 0           | 0           | 0           |
| 0           | 0           | 0           | 0           | 0           | 0           | 0           | 0           | 0           | 0           | 0           |
| 5.13E-05    | 0           | 0.000245869 | 0.000528849 | 0           | 0           | 0.000119547 | 6.05E-05    | 0.000483767 | 0           | 0.000408546 |
| 0           | 0           | 0           | 0           | 0           | 0           | 0           | 0           | 0           | 0           | 0           |
| 0           | 0           | 0           | 0           | 0           | 0           | 0           | 0           | 0           | 0           | 0           |
| 0           | 0           | 0           | 0           | 0           | 0           | 0           | 0           | 0           | 0           | 0           |
| 0           | 0           | 0           | 0           | 0           | 0           | 0.000155202 | 0           | 0           | 0           | 0           |
| 0.002457597 | 0.000413971 | 0.002231377 | 0.001464845 | 0.006569901 | 0.009961608 | 0.006413604 | 0.000251004 | 0.020374936 | 0.001010156 | 0.000344186 |
| 0.004703899 | 0.000659683 | 0.0007724   | 0.001737014 | 0.001205439 | 0.004894793 | 0.000593542 | 5.15E-05    | 0.002575643 | 0.000439672 | 0.001480279 |
| 0.01607285  | 0.006639567 | 0.0122285   | 0.015969464 | 0.017998085 | 0.004628942 | 0.023802483 | 0.009726406 | 0.006442443 | 0.008579059 | 0.01583535  |
| 0.065965356 | 0.046904295 | 0.096392221 | 0.128890856 | 0.107831959 | 0.068073594 | 0.045474089 | 0.047468893 | 0.090441096 | 0.064228484 | 0.104391868 |
| 0.011487934 | 0.010968907 | 0.022529481 | 0.012351607 | 0.011255978 | 0.009508097 | 0.015276878 | 0.006626954 | 0.009618625 | 0.005032612 | 0.024652666 |
| 0.000617476 | 0.00040863  | 0.001567994 | 0.004058195 | 0.003251031 | 0.001313619 | 0.000652266 | 0           | 0.001004234 | 0.000552316 | 0.002378521 |
| 0           | 6.14E-05    | 0           | 0.001801184 | 0.000153941 | 0           | 0.000167786 | 0           | 0.000220197 | 0           | 0.000372169 |

| H030        | H031        | H032        | H033        | H034        | H035        | H036        | H038        | H039        | H040        | H041        |
|-------------|-------------|-------------|-------------|-------------|-------------|-------------|-------------|-------------|-------------|-------------|
| 0.014809348 | 0.002711862 | 0.000200517 | 0.000854705 | 0.030377716 | 0.000240961 | 0.001071441 | 0.023955632 | 0.003383014 | 0.011590315 | 0.004014727 |
| 0.009278177 | 0.0030926   | 0.007926758 | 0.004117668 | 0.014289018 | 0.009490436 | 0.014944108 | 0.015329256 | 0.004663135 | 0.011983575 | 0.047490795 |
| 0.005246326 | 0.003311704 | 0.002726013 | 0.000658626 | 0.011282326 | 0.001230624 | 0.005653096 | 0.009948995 | 0.003226733 | 0.011817103 | 0.034125183 |
| 0.016774778 | 0.000795599 | 0.003441782 | 0.002141791 | 0.019998844 | 0.002444037 | 0.011838798 | 0.026583603 | 0.014642106 | 0.011105374 | 0.023104857 |
| 0.014778274 | 0.000143675 | 0.002299597 | 0.000191052 | 0.006078434 | 6.20E-05    | 0.000501459 | 0.011817237 | 0.009521621 | 0.018565252 | 0.063726232 |
| 0.005872985 | 0.003335051 | 0.000860445 | 0.005103093 | 0.019037569 | 0.008282186 | 0.046887994 | 0.035448257 | 0.006090344 | 0.006670945 | 0.008543905 |
| 0.00196543  | 9.88E-05    | 0           | 0.000467574 | 0.001394932 | 0.001067115 | 0.003370055 | 0.004016203 | 0.000429771 | 0.000441513 | 0.001069249 |
| 0.002247686 | 0.002002468 | 0.000149753 | 0.000985425 | 0.001691265 | 0.000130808 | 0.020130006 | 0.003363527 | 0.00425175  | 0.00650206  | 0.039370555 |
| 0.013392892 | 0.027797483 | 0.003642298 | 0.010140825 | 0.084975209 | 0.007937956 | 0.041646032 | 0.109577073 | 0.03238684  | 0.046491541 | 0.111065718 |
| 0.000740597 | 0.004281509 | 0.000327426 | 0.000990452 | 0.013963775 | 0.003858824 | 0.004260846 | 0.009814315 | 0.004681521 | 0.004779437 | 0.016916326 |
| 0.002221791 | 0.001142215 | 0.00135793  | 0.002197095 | 0.004412466 | 0.00370392  | 0.00202141  | 0.004154335 | 0.004136837 | 0.00121597  | 0.003122005 |
| 0.049821972 | 0.029103128 | 0.165819758 | 0.168226085 | 0.053195334 | 0.111002296 | 0.262179074 | 0.106672837 | 0.338641509 | 0.057823704 | 0.048363343 |
| 0.000396193 | 0           | 0.001771655 | 0.000829567 | 0.000126483 | 0.001311518 | 0           | 0.000721742 | 7.35E-05    | 0.000313643 | 0.000156352 |
| 0.001095358 | 0           | 0           | 0.000804428 | 0.000343312 | 0.002910469 | 0.0043574   | 0.01415513  | 0.011989934 | 0           | 0.001336561 |
| 0.002294297 | 0.003593666 | 0.000401034 | 0.002473617 | 0.002193585 | 0.000638548 | 0.004777878 | 0.006012218 | 0.009910024 | 0.004299322 | 0.001941797 |
| 0.023054315 | 0.001819282 | 0.018754664 | 0.021805037 | 0.021292589 | 0.009614359 | 0.016211772 | 0.029819357 | 0.008464429 | 0.051753506 | 0.026383215 |
| 0.180866188 | 0.022397106 | 0.056687869 | 0.049849421 | 0.04850099  | 0.1373497   | 0.120970028 | 0.166290831 | 0.159576204 | 0.117604057 | 0.15151561  |
| 0.007178093 | 0.013641923 | 0.010071526 | 0.001080951 | 0.023301869 | 0.000378654 | 0.004930497 | 0.055501646 | 0.015304    | 0.119073354 | 0.003641499 |
| 0.000344403 | 0.000359187 | 0.000411186 | 0           | 0.000542072 | 0.000318413 | 0.000376873 | 0.000569797 | 0.001604174 | 0.000916803 | 0.000776719 |
| 0.003262769 | 0.005926586 | 0.010909128 | 0.003921588 | 0.011145001 | 9.64E-05    | 0.007895647 | 0.011920836 | 0.018988084 | 0.003035099 | 0.021268977 |
| 0.037273257 | 0.003805586 | 0.016211401 | 0.012614443 | 0.238612874 | 0.02474329  | 0.013389895 | 0.090974076 | 0.021867782 | 0.061539167 | 0.215610027 |
| 0.002861397 | 0.000434616 | 0.000804605 | 0.000382103 | 0.019207418 | 0.002020633 | 0.001052753 | 0.009040773 | 0.001978787 | 0.007221027 | 0.017168508 |
| 0.002146695 | 0.00032686  | 0.00252042  | 0.001603829 | 0.002417641 | 0.001265047 | 0.003201864 | 0.001737016 | 0.003189961 | 0.004579188 | 0.012851163 |
| 0.003016767 | 0.001765404 | 0.001766578 | 0           | 0.011958109 | 0.000934586 | 0.000573096 | 0.001253553 | 0.000395298 | 0.002248579 | 0.004877188 |
| 0.000178675 | 0.000549556 | 0.000639623 | 0           | 0.00012287  | 0.000273663 | 0           | 0           | 7.12E-05    | 0.000441513 | 0.000151309 |
| 0.001742733 | 0.00670243  | 0.003665142 | 0.001015591 | 0.000393906 | 0.002802036 | 0           | 0.000214105 | 0.00030107  | 0.008497312 | 0.003111918 |
| 0.000212339 | 0.000316085 | 0.000385804 | 0.000196079 | 0           | 7.06E-05    | 0           | 0           | 0           | 0.000731029 | 0.000322792 |
| 5.18E-05    | 0.000210124 | 0.000164982 | 0.000211162 | 0           | 8.95E-05    | 0           | 0           | 0           | 0           | 0           |
| 0.000145012 | 0.001061398 | 0.000835064 | 0.000186024 | 0.000184304 | 0.001265047 | 0.000208682 | 0           | 0.000144789 | 0.000518717 | 0.000267312 |
| 0.000419499 | 0.000743517 | 0.000568554 | 0.000226245 | 0.001246766 | 0.000280548 | 0           | 0           | 0           | 0.000400498 | 0.000151309 |
| 0.000176086 | 0.000993152 | 0.001363006 | 0           | 0           | 0.005251237 | 0.000330153 | 8.98E-05    | 0.000179263 | 0.000646587 | 0.001225601 |
| 0           | 0.000459759 | 0.000276662 | 0           | 0           | 0.004098064 | 0           | 0.000296985 | 5.29E-05    | 0.000151996 | 0.000474101 |
| 0.000214928 | 4.31E-05    | 0.000365499 | 0.000221218 | 0.000112028 | 0.005259842 | 0.00040179  | 0.000131226 | 0           | 0.000248502 | 0.001825793 |
| 0.000139833 | 0.000319676 | 0.000380728 | 0           | 0.000101187 | 0.000165231 | 0           | 0           | 0           | 9.41E-05    | 0           |
| 0.011173691 | 0.032659079 | 0.006218558 | 0.047084199 | 0.006634961 | 0.075085283 | 0.017688117 | 0.002911143 | 0.046969192 | 0.005015875 | 0.002763908 |
| 0.004091409 | 0.017654042 | 0.010546167 | 0.008521913 | 0.034204744 | 0.073376179 | 0.04278911  | 0.011478812 | 0.020766924 | 0.017607435 | 0.004292127 |
| 0.062463909 | 0.052103669 | 0.008244031 | 0.051780049 | 0.119837668 | 0.11717607  | 0.07406646  | 0.016230571 | 0.05440171  | 0.080237114 | 0.017334947 |
| 0.000818282 | 0.005350091 | 0.000538096 | 0.005590777 | 0.00268145  | 0.000993105 | 0.000915708 | 0.000324611 | 0.001195086 | 0.001314888 | 0.000176527 |
| 0.003633068 | 0.00149781  | 0.004616962 | 0.013871362 | 0.000585438 | 0.000974172 | 0.004295107 | 0.001336432 | 0.00054928  | 0.00135349  | 0.000907853 |
| 0.000300382 | 0.000928498 | 0.003228574 | 0.000206135 | 0           | 0.000598961 | 0.00054195  | 0           | 0           | 0.003973615 | 0           |
| 0.00201722  | 0.000612414 | 0.004959617 | 0.126441058 | 0.003472875 | 0.000464711 | 0.000598013 | 7.60E-05    | 0.000420578 | 0.04093041  | 0.000141222 |
| 0.029209555 | 0.000353799 | 0.014325528 | 0.049366764 | 0.000570983 | 0.008070485 | 0.007615328 | 0.007141451 | 0           | 0.005278853 | 0           |
| 0.001921409 | 0.000400494 | 0.005139829 | 0.026304808 | 0.000932364 | 0.000261615 | 0.001875021 | 0.004458227 | 0.000473438 | 0.000991594 | 0           |
| 0.020226581 | 0.004664043 | 0.014881391 | 0.016294702 | 0.001109441 | 0.004726285 | 0.00750943  | 0.000680303 | 0.001110051 | 0.011102962 | 0.000549755 |
| 0.024809995 | 0.001223032 | 0.010480174 | 0.005495251 | 0.005453244 | 0.001376922 | 0.001239632 | 0.000801169 | 0.000900911 | 0.011771263 | 0.00045897  |
| 0.006409011 | 0           | 0.013404166 | 0.002996496 | 0.015589991 | 3.44E-05    | 0           | 0.000424757 | 0           | 0.005042414 | 0.003232965 |
| 0.006649835 | 0.038939464 | 0.017376428 | 0.023554668 | 0.0048136   | 0.029383518 | 0.005702931 | 0.006119271 | 8.04E-05    | 0.001363141 | 0.000635497 |
| 0.00776073  | 0.000132899 | 0.00097974  | 0.019753744 | 0.030609    | 0.015901729 | 0.022101581 | 0           | 0.000386105 | 0.005785507 | 0.000464014 |

|             |             |             |             |             |             |             |             |             |             |             |
|-------------|-------------|-------------|-------------|-------------|-------------|-------------|-------------|-------------|-------------|-------------|
| 0.000831229 | 0.000377146 | 0.016125102 | 0.013539535 | 0.002146605 | 0.004504256 | 0.00058244  | 9.67E-05    | 0.000190754 | 0.002656315 | 0           |
| 0.035424354 | 0.023846426 | 0.010264428 | 0.002644558 | 0.000997413 | 0.001860566 | 0.000336383 | 0.001512551 | 0.001657033 | 0.005508053 | 0.000776719 |
| 0.000582637 | 7.72E-05    | 0.006322624 | 0.006209182 | 0.000115642 | 0.000135971 | 0.000193109 | 0.000214105 | 0           | 0.000921628 | 0.000332879 |
| 0.004888975 | 0.002891455 | 0.008038438 | 0.025595905 | 0.001590078 | 0.005173785 | 0.002326646 | 0.001578164 | 0.000884824 | 0.003027861 | 0.000121047 |
| 0.002752638 | 0.000373554 | 0.017411963 | 0.0019256   | 9.40E-05    | 0.001228903 | 0.002927774 | 0.000770089 | 0.001280121 | 0.003742002 | 0.000902809 |
| 0.002610216 | 0.006012791 | 0.003180348 | 0.004389162 | 0.000982957 | 0.014127221 | 0.003317106 | 0.002662504 | 0.000280386 | 0.010516691 | 0.000504363 |
| 0.006763773 | 0.011219206 | 0.002718398 | 0.018471687 | 0.005012359 | 0.041166528 | 0.00179404  | 0.026383311 | 0.00304747  | 0.014490306 | 0.001422303 |
| 0.002983104 | 0.004416204 | 0.002236143 | 0.003438931 | 0.000910681 | 0.020688255 | 0.00534786  | 0.002759197 | 0.000972157 | 0.004002567 | 0.000363141 |
| 0.045352496 | 0.005007067 | 0.002066084 | 0.009959829 | 0.00411252  | 0.040130395 | 0.008512348 | 0.001716297 | 0           | 0.002482605 | 0.000126091 |
| 0.001147148 | 0.003791219 | 0.000337579 | 0.000226245 | 0.000104801 | 0.000499134 | 0.000395561 | 0.000307345 | 0.000266596 | 8.44E-05    | 0           |
| 0.056445912 | 0.026416409 | 0.043413151 | 0.014881925 | 0.009464577 | 0.083804642 | 0.031065554 | 0.02024332  | 0.038114062 | 0.036954382 | 0.009376103 |
| 0.006150062 | 0.000343024 | 0.000380728 | 0.003725509 | 0.000784198 | 0.002240941 | 0.00018065  | 0           | 0.000413684 | 0.000509067 | 0.000176527 |
| 0.005326601 | 0.005321356 | 0.143615698 | 0.044675941 | 0.000419202 | 0.000557653 | 0.000379988 | 9.32E-05    | 0.000852648 | 0.003850571 | 0           |
| 0.013359228 | 0.01548096  | 0.085475986 | 0           | 0.00047341  | 0.001430278 | 0           | 0.000196839 | 0.003472645 | 0.000448751 | 0.000171483 |
| 0.016057487 | 0.007885951 | 0.01574945  | 0           | 0.000224056 | 0.003203065 | 0.001681913 | 0.000683756 | 0.004171311 | 0.001633356 | 0.001795531 |
| 0.00010358  | 0           | 0.000642161 | 0.000226245 | 0           | 3.27E-05    | 0.00090325  | 0.001163766 | 0.003077347 | 0.000340182 | 0.001165078 |
| 4.92E-05    | 0           | 0           | 0           | 9.76E-05    | 0           | 0.000161962 | 0.001540178 | 0.000795192 | 0           | 0.00235033  |
| 0.000150191 | 0           | 0           | 0           | 0           | 0           | 0.000193109 | 0.000473104 | 0.000815876 | 0           | 0.000272356 |
| 0           | 0           | 0           | 0           | 0           | 8.43E-05    | 0.000218026 | 0           | 4.83E-05    | 0           | 0.00016644  |
| 9.06E-05    | 0           | 0           | 0           | 0           | 3.61E-05    | 0           | 0           | 0.000101123 | 0           | 0           |
| 0           | 0           | 0           | 0           | 0           | 0           | 0.000177535 | 0           | 6.21E-05    | 0           | 0           |
| 4.14E-05    | 0           | 0           | 0           | 0           | 0           | 0.000379988 | 0.000193386 | 0.000266596 | 0           | 0           |
| 0.00491487  | 0           | 0           | 0.000452491 | 0.00050232  | 0.00365917  | 0.007861385 | 0.016268557 | 0.006384519 | 0           | 0.001225601 |
| 0.0026387   | 0           | 0           | 0           | 0.001044392 | 9.98E-05    | 0.014096922 | 0.020343467 | 0.007064799 | 0           | 0.016734756 |
| 0.000963294 | 0           | 0           | 0           | 0.00057821  | 3.79E-05    | 0.011162918 | 0.00790118  | 0.002403962 | 0           | 0.00227972  |
| 0.000960704 | 0           | 0           | 0           | 0.000325243 | 0           | 0.0003613   | 0.009386105 | 0.001036508 | 0           | 0.009628285 |
| 0.000240823 | 0           | 0           | 0           | 0           | 6.02E-05    | 0.00147946  | 0.001080887 | 0.000517105 | 0           | 0.000479145 |
| 0           | 0           | 0           | 0           | 0           | 0           | 0           | 0           | 0           | 0           | 0           |
| 0.000209749 | 0           | 0           | 0           | 0           | 0           | 0           | 0.000107053 | 0.000124105 | 0           | 0           |
| 0.000113938 | 0           | 0           | 0           | 0.000108414 | 0.000189327 | 0.000193109 | 0           | 0.000213737 | 0           | 0           |
| 0           | 0           | 0           | 0           | 0           | 0.000144577 | 0.000526376 | 0           | 9.88E-05    | 0           | 0           |
| 0           | 0           | 0           | 0           | 0.000148166 | 0           | 0.00054195  | 0.000538717 | 0.000176965 | 0           | 0           |
| 7.77E-05    | 0           | 0           | 0           | 0           | 2.75E-05    | 0.000890791 | 0.00058361  | 0.000542385 | 0           | 0.00023705  |
| 6.47E-05    | 0           | 0           | 0           | 0           | 5.16E-05    | 0.000186879 | 0.000787355 | 0.000108017 | 0           | 0.000307661 |
| 0.000116527 | 0           | 0           | 0           | 0           | 0.000151461 | 0.000566867 | 0.00050073  | 0.000475736 | 0           | 0           |
| 7.25E-05    | 0.00072017  | 0.000568554 | 0.000447463 | 0           | 0.000273663 | 0           | 0           | 0           | 0.00086855  | 0.000181571 |
| 0           | 0           | 0           | 0           | 0           | 0           | 0           | 0           | 0           | 0           | 0           |
| 0           | 0           | 0           | 0           | 0           | 0           | 0           | 0           | 0           | 0           | 0           |
| 0           | 0           | 0           | 0           | 0           | 0           | 0           | 0           | 0           | 0           | 0           |
| 0           | 0           | 0           | 0.000211162 | 0           | 0           | 0           | 0           | 0           | 0           | 0           |
| 0.001113485 | 0.047980202 | 0.003198116 | 0.008054339 | 0.00072999  | 0.000469875 | 0.005774568 | 0.001481471 | 0.00068028  | 0.005713128 | 0.000796893 |
| 0.003809154 | 0.038468929 | 0.003977339 | 0.006435427 | 0.000831177 | 6.71E-05    | 0.000379988 | 0.003705405 | 0.00011721  | 0           | 0.000771675 |
| 0.010093869 | 0.0294246   | 0.010018224 | 0.011996038 | 0.007198716 | 0.010784742 | 0.018233182 | 0.004734492 | 0.012571389 | 0.011416605 | 0.001588743 |
| 0.169951447 | 0.392070587 | 0.09625059  | 0.118361581 | 0.078889547 | 0.073801303 | 0.080828373 | 0.062805402 | 0.088404215 | 0.112759479 | 0.040238059 |
| 0.013465398 | 0.043468813 | 0.014178313 | 0.012086536 | 0.012883245 | 0.00996031  | 0.014685591 | 0.005221409 | 0.009438884 | 0.011940147 | 0.0069249   |
| 0.004065514 | 0.034189216 | 0.074658233 | 0.001040729 | 0.000234898 | 0.000129086 | 0.001034065 | 0.000483464 | 0.000707859 | 0.000986769 | 0.001503001 |
| 0.00031074  | 0.000413065 | 0.006525679 | 0.000246356 | 0           | 0.000175558 | 0           | 8.98E-05    | 0.000763017 | 7.72E-05    | 0.000151309 |

| H042        | H043        | H044        | H045        | H046        | H047        | H048        | H049        | H050        | H051        | H052        |
|-------------|-------------|-------------|-------------|-------------|-------------|-------------|-------------|-------------|-------------|-------------|
| 0.067848599 | 0.023995672 | 0.002182207 | 0.299766546 | 0.005652785 | 0.021428056 | 0.004198102 | 0.01131118  | 0.029108148 | 0.00090834  | 0.001560499 |
| 0.008144919 | 0.023107575 | 0.005184657 | 0.000840791 | 0.004047868 | 0.005435399 | 0.007544415 | 0.005274531 | 0.009110452 | 0.005716249 | 0.008039575 |
| 0.037861718 | 0.007562673 | 0.009058457 | 0.006748689 | 0.001586469 | 0.001351114 | 0.002423101 | 0.001902883 | 0.012742137 | 0.004052842 | 0           |
| 0.056563006 | 0.002342703 | 0.009814819 | 0.015952665 | 0.001188534 | 0.005536475 | 0.002637371 | 0.01098318  | 0.004061239 | 0.002554    | 0.01282015  |
| 0.033208581 | 0.000900876 | 0.000868794 | 0.001062169 | 0.000221368 | 0.000346545 | 0.000798883 | 0.000496824 | 0.000880586 | 0.000425936 | 0.002363748 |
| 0.013820511 | 0.019150536 | 0.026822743 | 0.004767463 | 0.013740615 | 0.002126716 | 0.006348736 | 0.005144296 | 0.009081164 | 0.00463689  | 0.001004947 |
| 0.002048769 | 0.003522574 | 0.001180538 | 0.000138641 | 0.003847583 | 0.000909682 | 0.000211625 | 0.000342471 | 0.0007361   | 0.000348493 | 3.89E-05    |
| 0.021116599 | 0.005100704 | 0.030259591 | 6.48E-05    | 0.000766881 | 0.000717844 | 0.00094702  | 0.003632119 | 0.002290304 | 0.001311688 | 8.49E-05    |
| 0.105648584 | 0.026561998 | 0.177060256 | 0.005474085 | 0.017825378 | 0.007089741 | 0.016276572 | 0.023854773 | 0.040260935 | 0.012768388 | 0.010300706 |
| 0.005343777 | 0.011564436 | 0.011815601 | 0.0033654   | 0.002619519 | 0.004616479 | 0.016207794 | 0.001854648 | 0.00547291  | 0.001290714 | 0.001546344 |
| 0.002473185 | 0.003501277 | 0.00327331  | 0.01339675  | 0.001009332 | 0.003488144 | 0.000568741 | 0.001172118 | 0.002864345 | 0.003341336 | 0.002954685 |
| 0.047750598 | 0.186474934 | 0.294334695 | 0.006216486 | 0.246437692 | 0.171327496 | 0.0720608   | 0.129424987 | 0.019191306 | 0.098236239 | 0.011065031 |
| 0.000173625 | 0.001616465 | 0.000758917 | 9.84E-05    | 0.000943448 | 0.001099456 | 0.00021956  | 0.001121471 | 0.000361216 | 0.000696986 | 0           |
| 0.002083494 | 0           | 0.000301523 | 0           | 0.00195278  | 0.001423311 | 0.000243368 | 0.000728353 | 0.000339738 | 0.003205811 | 0.005760752 |
| 0.000331816 | 0.005092185 | 0.002202649 | 0           | 0.00123597  | 0.001674969 | 0.002002497 | 0.004191649 | 0.000732194 | 0.002382981 | 0.000682939 |
| 0.011459218 | 0.005969634 | 0.001770807 | 0.001093475 | 0.003428565 | 0.006891715 | 0.003161142 | 0.001210706 | 0.033641896 | 0.023310294 | 7.43E-05    |
| 0.089177406 | 0.133155004 | 0.018824726 | 0.003953506 | 0.062536401 | 0.064166589 | 0.011591734 | 0.033984188 | 0.113128931 | 0.171948914 | 0.091828791 |
| 0.149610309 | 0.006813008 | 0.000546829 | 0.000415923 | 0.003868666 | 0.001068515 | 0.020614875 | 0.000672883 | 0.029719286 | 0.005398411 | 0.000297238 |
| 0.000555598 | 0.000355665 | 6.13E-05    | 0.00040027  | 0.000234544 | 0.000253721 | 0.000547578 | 0.000571588 | 0.00055061  | 0.00062761  | 0           |
| 0.018562389 | 0.001115979 | 0.002562943 | 0.000541147 | 0.003673651 | 0.009534123 | 0.000928503 | 0.000381059 | 0.003055692 | 0.001568217 | 0.001036794 |
| 0.030341847 | 0.00568851  | 0.010905922 | 0.000210198 | 0.01800458  | 0.001307796 | 0.004758907 | 0.035660366 | 0.020019174 | 0.012177886 | 0.011670123 |
| 0.002245544 | 0.000523914 | 0.001418179 | 0           | 0.001741954 | 7.63E-05    | 0.00086237  | 0.002438295 | 0.001923231 | 0.001331049 | 0.001397725 |
| 0.003163824 | 0.006440305 | 0.000493168 | 0           | 0.000669374 | 0.001765731 | 0.000801528 | 0.002778354 | 0.00180608  | 0.001421399 | 8.14E-05    |
| 0.000941431 | 0.00205306  | 0.000306633 | 0           | 0.00031624  | 0.000802418 | 0.000338599 | 0.001097353 | 0.000654094 | 0.000608249 | 7.78E-05    |
| 0.000354966 | 0.000570768 | 0.000286191 | 0.000657427 | 0.00020292  | 0.000515693 | 0.000156073 | 0.000815177 | 0           | 0.001377837 | 0.004094097 |
| 0.001323405 | 0.004238163 | 0.002867021 | 0.011136007 | 0.002442952 | 0.0064936   | 0.002682341 | 0.007367944 | 0.001784602 | 0.002718566 | 0.005842138 |
| 8.87E-05    | 0.000268346 | 6.64E-05    | 0.000695441 | 0.000387394 | 0.000705467 | 0.000190462 | 0.00064153  | 0.000148391 | 0.000164566 | 0.001418957 |
| 0           | 0.000172508 | 6.13E-05    | 0.000440521 | 0           | 0.000534257 | 0           | 0.000246    | 0           | 0.000322678 | 0.001026178 |
| 0.000378116 | 0.000457892 | 0.00036796  | 0.00113149  | 0.000176567 | 0.006012975 | 0           | 0.001111824 | 0.000326071 | 0.001577898 | 0.007105399 |
| 9.26E-05    | 0.000247049 | 0.000250417 | 0.000415923 | 8.17E-05    | 0.001580082 | 5.03E-05    | 0.000383471 | 0.000283115 | 0.000968035 | 0.004663803 |
| 0.000150475 | 0.000438724 | 0.000511055 | 0.001639095 | 0.000811682 | 0.016473282 | 0.000407377 | 0.002013824 | 0.000300688 | 0.001882829 | 0.009348837 |
| 0.000119608 | 0.000204454 | 6.39E-05    | 6.26E-05    | 0.00031624  | 0.004971276 | 0           | 0.000400353 | 3.51E-05    | 0.000761521 | 0.003800398 |
| 0           | 0.000483449 | 6.90E-05    | 0.000695441 | 0.000455912 | 0.000901431 | 0           | 0.000451    | 0           | 0.000832511 | 0.002855606 |
| 0           | 5.11E-05    | 4.60E-05    | 0.000219142 | 8.43E-05    | 0.000604392 | 0           | 0.000144706 | 0           | 0.000224262 | 0.001666655 |
| 0.000432132 | 0.033104529 | 0.006137775 | 0.00027281  | 0.133803652 | 0.097387502 | 0.022112119 | 0.047499723 | 0.004582561 | 0.035778591 | 0.036620406 |
| 0.001558762 | 0.113966133 | 0.008105339 | 0           | 0.03731892  | 0.046191611 | 0.066500365 | 0.029782893 | 0.007124741 | 0.019801166 | 0.010134394 |
| 0.041473107 | 0.101873524 | 0.148027198 | 0.016844887 | 0.135303155 | 0.071342966 | 0.19954342  | 0.136267166 | 0.059026591 | 0.127288597 | 0.341689018 |
| 0.000235358 | 0.005004866 | 0.001522945 | 0.002430691 | 0.004256059 | 0.003244737 | 0.004023511 | 0.004107237 | 0.00079858  | 0.000784109 | 0.006312765 |
| 0.000335674 | 0.002221309 | 6.90E-05    | 0.005413709 | 0.004124293 | 0.001930753 | 0.004028802 | 0.000344882 | 0.006142624 | 0.002662098 | 0.011365808 |
| 0           | 0.000204454 | 0           | 6.48E-05    | 0.00075634  | 0.001047887 | 0.000486736 | 0.000202588 | 0.000144486 | 0.002281337 | 0           |
| 0.000270083 | 0           | 0.001793804 | 0.000360019 | 0.002092453 | 0.063770537 | 0.000108458 | 5.31E-05    | 0.000726337 | 0.007347389 | 0.017430875 |
| 9.65E-05    | 0.004985699 | 0.001775918 | 0.003763434 | 0.001098933 | 0.019594253 | 0.135902632 | 0.000197765 | 0.043494305 | 0.051265545 | 0.005194585 |
| 0.000605757 | 0.00742211  | 0.001093659 | 7.60E-05    | 0.001931697 | 0.004391638 | 0.037240628 | 6.51E-05    | 0.02534174  | 0.006947268 | 0.0077848   |
| 0.003090516 | 0.004561883 | 0.007348977 | 0.000610468 | 0.001860544 | 0.003250926 | 0.012647211 | 0.000159177 | 0.016018463 | 0.002079663 | 0.008216502 |
| 0.001443013 | 0.001075514 | 0.000490613 | 0.001815751 | 6.85E-05    | 0.002246357 | 0.008946427 | 0.000214647 | 0.000513512 | 0.006080876 | 0.004394873 |
| 0.024280423 | 0.000896616 | 0           | 0.000225851 | 0.006517173 | 0.011374114 | 0.00176442  | 0           | 0.000905969 | 0.006656857 | 0.001128796 |
| 0.000223783 | 0.019885293 | 0.000176314 | 0.002010295 | 0.00302536  | 0           | 0.001756484 | 0.014526064 | 0.001243754 | 0.041457732 | 0.074748232 |
| 0.002519485 | 0.000832725 | 0.000311744 | 0.000125224 | 0.045946993 | 0.035122786 | 0.001851715 | 0.020519301 | 0.000134724 | 0.008158926 | 0.084684468 |



|             |             |             |             |             |             |             |             |             |             |             |
|-------------|-------------|-------------|-------------|-------------|-------------|-------------|-------------|-------------|-------------|-------------|
| 0.000937572 | 0.001437568 | 0.000434397 | 0.000136405 | 0.001267594 | 0.001827614 | 0.001756484 | 0.013590299 | 0.000117151 | 0.007179596 | 0.012491065 |
| 0.003186974 | 0.006073991 | 0.014603408 | 0.057647843 | 0.006229922 | 0.001171653 | 0.014088903 | 0.003181119 | 0.064370635 | 0.004862765 | 0.010137932 |
| 0.000486149 | 0.000187416 | 0.000751251 | 0.001831404 | 0           | 7.01E-05    | 0.000362407 | 0.00117453  | 0.000386599 | 0.000104871 | 0.002038202 |
| 0.00287445  | 0.018760795 | 0.014368323 | 0.010169992 | 0.003966173 | 0.003191105 | 0.002182378 | 0.031386717 | 0.008229866 | 0.006455183 | 0.018941833 |
| 0           | 0.000146951 | 0.000564716 | 0.008132863 | 0.000160755 | 0.001233537 | 0.001690351 | 0.000325588 | 0.002237586 | 0.010380567 | 0.000247698 |
| 0.003325874 | 0.005077277 | 0.002713704 | 0.007526867 | 0.001383549 | 0.011555638 | 0.016966997 | 0.001864295 | 0.009565389 | 0.009067266 | 0.000254775 |
| 0.000922139 | 0.014829313 | 0.002928347 | 0.007191445 | 0.01202765  | 0.014235176 | 0.070822796 | 0.014374123 | 0.01493091  | 0.019959278 | 0.000403394 |
| 0.000590323 | 0.029633069 | 0.002373852 | 0.003870769 | 0.008802005 | 0.010747032 | 0.003904473 | 0.011849004 | 0.008009232 | 0.012566714 | 0.001620654 |
| 0.013029555 | 0.00552878  | 0.008113005 | 0.026375342 | 0.010567677 | 0           | 0.016906155 | 0.1505207   | 0.046729629 | 0.030372113 | 0.001040332 |
| 0.00062119  | 3.83E-05    | 0.000143096 | 0.000261629 | 0.000619303 | 0.000829234 | 0.000650745 | 0.00658412  | 0.003086932 | 0.003997986 | 8.14E-05    |
| 0.023111351 | 0.021780753 | 0.025979502 | 0.075306687 | 0.024719403 | 0.043083016 | 0.039094988 | 0.106477038 | 0.068174141 | 0.028507031 | 0.001486189 |
| 0.000235358 | 0.000538822 | 0.000222309 | 0.001645803 | 0.000171297 | 0.001809049 | 0.002682341 | 0.014362064 | 0.004309209 | 0.001803773 | 0.000707709 |
| 0.000331816 | 0.000387611 | 0.000940342 | 0.011934311 | 0.000239815 | 0.000847799 | 0.002018369 | 0.001015353 | 0.000855203 | 0.000141979 | 0.008775593 |
| 0.003950922 | 0.002033893 | 0.000145651 | 0.03385525  | 0.000152849 | 0.00288169  | 0.000888823 | 0.000118177 | 0.014292437 | 0.004514272 | 0.000421087 |
| 0.002774134 | 0.00079013  | 0.001395181 | 0.011352913 | 0.001979133 | 0.008706953 | 0.001124255 | 0.001647236 | 0.004506413 | 0.001402038 | 0.001673732 |
| 9.26E-05    | 9.16E-05    | 0           | 0.000196781 | 0.000339958 | 6.19E-05    | 0           | 0.000108529 | 8.59E-05    | 0           | 7.08E-05    |
| 0.000563315 | 0           | 0           | 7.60E-05    | 0           | 0           | 0           | 0           | 0           | 0           | 0           |
| 0.00016205  | 0           | 0           | 0           | 0           | 0           | 0           | 0           | 0           | 0           | 0           |
| 0           | 0           | 5.11E-05    | 0           | 0           | 0           | 0           | 0           | 0           | 0           | 0           |
| 0           | 0           | 0           | 0           | 0           | 0.000202151 | 0.000232787 | 0           | 0           | 0           | 0           |
| 0           | 0           | 0           | 0           | 0           | 0           | 0.000145492 | 0           | 0           | 0           | 0           |
| 0.000270083 | 0           | 0           | 0           | 0           | 0           | 0           | 0           | 0           | 0           | 0           |
| 0.00692183  | 9.16E-05    | 0           | 0           | 8.96E-05    | 0.000156771 | 0.000230142 | 0           | 3.91E-05    | 0           | 0           |
| 0.020371942 | 0           | 0           | 0           | 0           | 0.000315604 | 0.001391431 | 0           | 0.000101531 | 0           | 0           |
| 0.00220696  | 0           | 0           | 0           | 0           | 0.000429056 | 0.00121155  | 0           | 0           | 0           | 0           |
| 0.019750752 | 0           | 0           | 0           | 0           | 0           | 8.46E-05    | 0           | 3.71E-05    | 0           | 0           |
| 0.001956169 | 5.32E-05    | 0           | 8.94E-05    | 0.000105413 | 0           | 0           | 0           | 3.32E-05    | 0           | 0           |
| 0           | 0           | 0           | 0           | 0           | 0           | 0           | 0           | 0           | 0           | 0           |
| 9.65E-05    | 0           | 0           | 0           | 0           | 0           | 0.001576603 | 0           | 0           | 0           | 0           |
| 0.000192916 | 0           | 0           | 0           | 9.75E-05    | 0.000226905 | 0.000140201 | 0           | 0           | 0           | 0           |
| 0           | 0           | 0           | 0           | 0           | 0.000158833 | 0.000208979 | 0           | 0           | 0           | 0           |
| 0.000601898 | 0           | 0           | 0           | 0           | 0           | 0.000624292 | 0           | 0           | 0           | 0           |
| 0.000987731 | 0           | 0           | 0           | 0           | 0           | 6.35E-05    | 0           | 0           | 0           | 0           |
| 0.000273941 | 0           | 0           | 0           | 0           | 0           | 0.000203689 | 0           | 0           | 0           | 0           |
| 0           | 0.000106487 | 0           | 0           | 0           | 0           | 0.000370343 | 0           | 3.91E-05    | 0           | 0           |
| 0.000119608 | 0.000170378 | 0.000291302 | 0.001355104 | 0.000171297 | 0.000511567 | 0.000521125 | 0.000397941 | 0.000363168 | 0.00017102  | 0.000109695 |
| 0           | 0           | 0           | 0           | 0           | 0           | 0           | 0           | 0           | 0           | 0           |
| 0           | 0           | 0           | 0           | 0           | 0           | 0           | 0           | 0           | 0           | 0           |
| 0           | 0           | 0           | 0           | 0           | 0           | 0           | 0           | 0           | 0           | 0           |
| 0           | 0           | 0           | 0           | 0           | 0           | 0.000158718 | 0           | 4.10E-05    | 0           | 0           |
| 0.002060344 | 0.003222282 | 0.00068737  | 0.00054562  | 0.000732622 | 0.000554885 | 0.002147989 | 0.000154353 | 0.015813449 | 0.002147425 | 0.012912152 |
| 0.000582607 | 0.006127234 | 0.000403734 | 0.001028627 | 0.000450642 | 0.000144394 | 0.00198398  | 0.00051853  | 0.001880275 | 0.007098927 | 0.00868359  |
| 0.00117293  | 0.017105995 | 0.017102469 | 0.02450816  | 0.01903763  | 0.031473746 | 0.02324431  | 0.019952536 | 0.039327631 | 0.012332772 | 0.015063588 |
| 0.063442395 | 0.067427264 | 0.090847764 | 0.174987366 | 0.114354911 | 0.129896758 | 0.100087824 | 0.062681787 | 0.1567892   | 0.132841894 | 0.062681793 |
| 0.020395092 | 0.011607031 | 0.020764181 | 0.106290726 | 0.011656068 | 0.01845973  | 0.012647211 | 0.009417945 | 0.019802444 | 0.013765464 | 0.013205851 |
| 0.011852766 | 0.000751795 | 0.000723143 | 0.015831913 | 6.32E-05    | 0.00101282  | 0.000891468 | 0.000487177 | 0.004902774 | 0.000104871 | 0.010735947 |
| 0           | 0.000223622 | 0           | 0.002236146 | 0           | 7.84E-05    | 0           | 6.51E-05    | 0.000134724 | 0.00053242  | 0           |

| H053        | H054        | H055        | H056        | H057        | H058        | H059        | H060        | H061        | H062        | H063        |
|-------------|-------------|-------------|-------------|-------------|-------------|-------------|-------------|-------------|-------------|-------------|
| 0.005444561 | 0.001618087 | 0.000605813 | 0.118020776 | 0.040131721 | 0.000901371 | 0.013632075 | 0.008874775 | 0.001351172 | 0.015094156 | 0.002517095 |
| 0           | 0.005827908 | 0.001795227 | 0.018095144 | 0.018097573 | 0.004059442 | 0.008056071 | 0.00540074  | 0.006446167 | 0.005910735 | 0.000843865 |
| 0           | 0.001971234 | 0           | 0.074573839 | 0.004969377 | 0.000626376 | 0.001014007 | 0.002257057 | 0.002217821 | 0.004729915 | 0.000173993 |
| 0           | 0.004078139 | 0.003925671 | 0.017644872 | 0.094436998 | 0.009622625 | 0.00256716  | 0.020720596 | 0.00444813  | 0.006784189 | 0.008870729 |
| 0.000247577 | 0.000337185 | 0           | 0.005850637 | 0.011715549 | 0.000220432 | 0           | 0.003303531 | 0           | 0.002193584 | 0.000403083 |
| 0           | 0.005301182 | 0.001373177 | 0.015957076 | 0.025330324 | 0.004229677 | 0.000870927 | 0.007625827 | 0.005714386 | 0.008316601 | 0.000611874 |
| 0           | 0.000865906 | 0           | 0.007224695 | 0.001531937 | 0.000622011 | 0           | 0.000385767 | 0.001573454 | 0.0006081   | 0.000260989 |
| 0           | 0.000800065 | 0.003818644 | 0.002393707 | 0.010871101 | 0.001536477 | 0           | 0.001195665 | 0           | 0.022263106 | 0.001081655 |
| 0.001005248 | 0.00868899  | 0.005765324 | 0.043194204 | 0.055746176 | 0.029005371 | 0.017399869 | 0.039868285 | 0.003061992 | 0.030884863 | 0.017877753 |
| 0.000256114 | 0.00062449  | 0.002170831 | 0.009208799 | 0.005848357 | 0.002896172 | 0.001841388 | 0.0082162   | 0.003573989 | 0.008593011 | 0.001763126 |
| 0           | 0.00783705  | 0           | 0.001400202 | 0.007339484 | 0.000395032 | 0.002455184 | 0.004691013 | 0.001993042 | 0.006209257 | 0.002090813 |
| 0.001809874 | 0.117031019 | 0.005737053 | 0.012825503 | 0.180526823 | 0.062790408 | 0.056137441 | 0.052790418 | 0.365053835 | 0.098857214 | 0.092752623 |
| 0           | 0.010255203 | 0           | 0.000145249 | 0.002034211 | 0.000892641 | 0.002187685 | 0           | 0.001538488 | 0.001001707 | 0.000495879 |
| 0           | 0.000704297 | 0           | 0           | 0           | 0.0027805   | 0.000493525 | 8.53E-05    | 0.005152438 | 0.00078058  | 4.93E-05    |
| 0           | 0.000796075 | 0           | 0.00097898  | 0.023967905 | 0.000938473 | 0           | 0.003772419 | 0.01094175  | 0.003137798 | 0.000194292 |
| 0.00023904  | 0.00659206  | 0.000571484 | 0.005740248 | 0.000954321 | 0.002097379 | 0.000705036 | 0.04882405  | 0.012754968 | 0.005430889 | 0.000513279 |
| 0.000966831 | 0.035408383 | 0           | 0.203287861 | 0.054700817 | 0.02947679  | 0.010127632 | 0.295148073 | 0.067283894 | 0.037651362 | 0.007388891 |
| 0           | 0.002481999 | 0           | 0.005847732 | 0.000229163 | 0.004450109 | 0           | 0.02912222  | 0.001173847 | 0.001397525 | 0.00024359  |
| 0           | 0.00084795  | 0           | 6.97E-05    | 0.000244859 | 0.001811472 | 0           | 0           | 0.000204799 | 0           | 0.000121795 |
| 0           | 0.002124862 | 0           | 0.007605248 | 0.010767507 | 0.000211702 | 0           | 0.001042211 | 0.00322683  | 0.001189665 | 0.000350885 |
| 0.000734194 | 0.002938894 | 0           | 0.002977608 | 0.024903391 | 0.00946985  | 0.000170038 | 0.007035454 | 0.000881634 | 0.03896707  | 0.008682237 |
| 0           | 0.000297281 | 0           | 0.000653621 | 0.002564738 | 0.001099978 | 0.000165891 | 0.000294121 | 0           | 0.003856462 | 0.00024359  |
| 0.000740597 | 0.001945296 | 0           | 0.000964455 | 0.002269652 | 0.00125057  | 0.002113034 | 0.002225088 | 0.001138881 | 0.000203437 | 0.000655373 |
| 0           | 0.000464876 | 0           | 0.000339883 | 0.000263694 | 0           | 0.001289801 | 0.00082908  | 0.000574436 | 0.000610312 | 0.000510379 |
| 0.051991181 | 0.019800123 | 0.046270007 | 0.000578092 | 0.000565059 | 0.014993747 | 0.039197918 | 0.01633436  | 0           | 0.011693217 | 0.000661172 |
| 0.035676707 | 0.028439234 | 0.032701807 | 0.002286222 | 0.002115831 | 0.02395944  | 0.038598638 | 0.023602127 | 0.000464544 | 0.090208921 | 0.007713678 |
| 0.000439663 | 0.001027515 | 0           | 0.000148154 | 0.000254276 | 0.00022698  | 0.00015967  | 0.001994906 | 0.000237267 | 0.010788806 | 0.000614774 |
| 0.030829746 | 0.009383311 | 0.026346824 | 0           | 0           | 0.022185071 | 0.018480233 | 0.003989812 | 0           | 0.002209063 | 0.000133394 |
| 0.188911963 | 0.068286882 | 0.122392478 | 0.000519992 | 0.000750272 | 0.131013049 | 0.128034505 | 0.0226473   | 0           | 0.013968618 | 0.000603175 |
| 0.122655221 | 0.039241115 | 0.083129713 | 0.000700101 | 0.0009606   | 0.085136984 | 0.083289614 | 0.014590948 | 0           | 0.008079995 | 0.00023779  |
| 0.284835265 | 0.094036619 | 0.176845005 | 0.001368247 | 0.001070472 | 0.191756276 | 0.177648291 | 0.031438954 | 0           | 0.017785276 | 0.001371643 |
| 0.103675025 | 0.032497421 | 0.067861196 | 0.000180109 | 0.000370427 | 0.066328234 | 0.067590125 | 0.011344963 | 8.49E-05    | 0.006850527 | 0.000510379 |
| 0.085292429 | 0.033993803 | 0.059157677 | 0.000438653 | 0.000587033 | 0.046834181 | 0.057655341 | 0.009407602 | 0           | 0.004672422 | 8.41E-05    |
| 0.043236344 | 0.01351532  | 0.02360047  | 0.000258544 | 0.000156961 | 0.030334511 | 0.030275068 | 0.005063993 | 0           | 0.002868022 | 6.38E-05    |
| 0.005557678 | 0.030123162 | 0.001607425 | 0.002010249 | 0.012597669 | 0.018863312 | 0.055202231 | 0.003542237 | 0.067508673 | 0.040932892 | 0.06530527  |
| 0           | 0.012611505 | 0           | 0.000145249 | 0.029257482 | 0.009779764 | 0.011259837 | 0.000890888 | 0.016548741 | 0.022784967 | 0.014238405 |
| 0.008547811 | 0.027397752 | 0.044505071 | 0.002559291 | 0.087003337 | 0.035849678 | 0.058690085 | 0.089679131 | 0.005999106 | 0.109714569 | 0.20167207  |
| 0           | 0           | 0           | 4.36E-05    | 0.005744763 | 0           | 0.00224782  | 0           | 0.000729283 | 0.003301432 | 0.006492829 |
| 0           | 0.002340341 | 0           | 0.000313738 | 0.00035787  | 0           | 0           | 0.001084837 | 0.010514669 | 0.003022812 | 0.003323261 |
| 0.001895245 | 0.000155624 | 0           | 0.000264354 | 0           | 0           | 0           | 0.002348704 | 0.001878155 | 0.000641269 | 6.09E-05    |
| 0           | 0           | 0.020506783 | 0.003846199 | 0.007185663 | 0           | 0           | 0.005535012 | 0.000259745 | 0.018565856 | 0.007278696 |
| 0.000245443 | 0.005093683 | 0.005975339 | 0.00806133  | 0.015824782 | 0           | 0.001497164 | 0.000664969 | 0.000114887 | 0.00069434  | 0.000304487 |
| 0           | 0.00557053  | 0           | 0.002437281 | 0.006736755 | 0           | 0.003071053 | 0.000534959 | 0           | 0.000212282 | 0.000130495 |
| 0           | 0.005552574 | 0.001587231 | 0.003204197 | 0.000756551 | 0.004836411 | 0           | 0.008870512 | 0           | 0.003703884 | 0.005759159 |
| 0.000221966 | 0.001209076 | 0           | 0.000958645 | 0.001042219 | 0.000674391 | 0.000165891 | 0.004273277 | 0           | 0.005773636 | 0.01769506  |
| 0           | 0           | 0           | 0           | 0.000583894 | 0           | 0           | 0.0008781   | 0.000119882 | 0.013544053 | 0.009836389 |
| 0           | 0.015614245 | 0.073775954 | 0.004101837 | 0           | 0.000248805 | 0.000852264 | 0.004993659 | 0.010115062 | 0.019021379 | 0.035659809 |
| 0.003421259 | 0.006643935 | 0           | 0           | 0.041604013 | 0.00680284  | 0.008773549 | 0.001227635 | 0.005577021 | 0.005273888 | 0.017135384 |

|             |             |             |             |             |             |             |             |             |             |             |
|-------------|-------------|-------------|-------------|-------------|-------------|-------------|-------------|-------------|-------------|-------------|
| 0           | 0           | 0           | 0.001345007 | 0.031128454 | 0           | 0.000514261 | 0.001270261 | 0.005889214 | 0.001227257 | 0.001360043 |
| 0.00026892  | 0.006204996 | 0.002558552 | 0.011242287 | 0.003220834 | 0.020419432 | 0.002973592 | 0.003437803 | 0.011853354 | 0.003250573 | 0.033928582 |
| 0           | 0.002264524 | 0           | 0.000116199 | 0.000144404 | 0           | 0.004605543 | 0.000362323 | 0.002500044 | 0.000176902 | 0.003708945 |
| 0           | 0.019630533 | 0           | 0.011378822 | 0.008256135 | 0.004094362 | 0           | 0.011195771 | 0.004220853 | 0.005127944 | 0.008055863 |
| 0           | 0.009006223 | 0           | 0.002143878 | 0.001641809 | 0.001032321 | 0           | 0.002964652 | 0           | 0.000835862 | 0.000536478 |
| 0           | 0.001177154 | 0.002576726 | 0.002771355 | 8.48E-05    | 0           | 0           | 0           | 0.0078373   | 0.006242426 | 0.000730769 |
| 0.000213428 | 0.019838032 | 0           | 0.021043703 | 0.001936896 | 0.005024106 | 0.000178333 | 0.004026045 | 0.108890515 | 0.012270359 | 0.007919569 |
| 0           | 0.012958666 | 0           | 0.003311682 | 0.003776475 | 0           | 0.009986625 | 0.005656497 | 0.001690839 | 0.00395818  | 0.003163768 |
| 0.000960428 | 0.054568054 | 0.000149434 | 0.073223021 | 0.00515773  | 0           | 0           | 0.03045642  | 0.011106588 | 0.011129342 | 0.047798702 |
| 0           | 0.00255183  | 0           | 0.001417632 | 0.000172657 | 0           | 0           | 0.0015452   | 0           | 5.31E-05    | 0.001632632 |
| 0           | 0.048095705 | 0.009816196 | 0.050314319 | 0.022542701 | 0.020594032 | 0.004937324 | 0.017419197 | 0.0492616   | 0.040786948 | 0.008873629 |
| 0           | 0.003701051 | 0           | 0.006100466 | 0.000869562 | 0           | 0           | 0.00701201  | 0.00150602  | 0.002259922 | 0.001386142 |
| 0           | 0.000728239 | 0           | 0.001629696 | 0.002828432 | 0.001820202 | 0           | 0.00063513  | 0           | 0.004614929 | 0.01268697  |
| 0           | 0.001576189 | 0.001304518 | 0.015521328 | 0.002181754 | 0.004395547 | 0           | 0.004582317 | 0.000224779 | 0.000165846 | 0           |
| 0           | 0.005716178 | 0           | 0.017691351 | 0.004350952 | 0.004718556 | 0           | 0.003015804 | 0.0008142   | 0.001954766 | 0           |
| 0           | 0           | 0           | 7.84E-05    | 0           | 0           | 0           | 0.000219525 | 0.000756756 | 0.000101719 | 0.000115995 |
| 0           | 0           | 0           | 0           | 0           | 0           | 0           | 0           | 0.000551958 | 0           | 0           |
| 0           | 0           | 0           | 0           | 0           | 0           | 0           | 0           | 0.000342164 | 0           | 0           |
| 0           | 0           | 0           | 0           | 0           | 0           | 0           | 0           | 9.74E-05    | 0           | 0           |
| 0           | 0           | 0           | 0           | 0           | 0           | 0           | 0           | 0.000546963 | 0           | 0           |
| 0           | 0           | 0           | 0           | 0           | 0           | 0           | 0           | 0.000472036 | 0           | 0           |
| 0           | 0           | 0           | 0           | 0           | 0           | 0           | 0           | 0.000454553 | 0           | 0           |
| 0           | 0           | 0           | 9.01E-05    | 0           | 0           | 0           | 0           | 0.001838194 | 0           | 0           |
| 0           | 0           | 0           | 9.01E-05    | 0.000222884 | 0           | 0           | 0           | 0.000104897 | 0           | 0           |
| 0           | 0           | 0           | 0           | 0           | 0           | 0           | 0           | 0.000242262 | 0           | 0           |
| 0.000230503 | 0           | 0           | 7.55E-05    | 0           | 0           | 0           | 0           | 0.000102399 | 0           | 0           |
| 0           | 0           | 0           | 0           | 0           | 0           | 0           | 0           | 0.000172331 | 0           | 0           |
| 0           | 0           | 0           | 0           | 0           | 0           | 0           | 0           | 0           | 0           | 0           |
| 0           | 0           | 0           | 0           | 0           | 0           | 0           | 0           | 0.000551958 | 0           | 0           |
| 0           | 0           | 0           | 0           | 0           | 0           | 0           | 0           | 0.000591918 | 0           | 0           |
| 0           | 0           | 0           | 0           | 0           | 0           | 0           | 0           | 0.000821693 | 0           | 9.28E-05    |
| 0           | 0           | 0           | 0           | 0           | 0           | 0           | 0           | 0           | 0           | 0           |
| 0           | 0           | 0           | 0           | 0           | 0           | 0           | 0           | 0.000222282 | 0           | 0           |
| 0           | 0           | 0           | 0           | 0           | 0           | 0           | 0           | 0           | 0           | 0           |
| 0           | 0           | 0           | 0           | 0           | 0           | 0           | 0           | 0.000332174 | 0           | 0           |
| 0           | 0.001157202 | 0.000153473 | 0.000569377 | 0.000235441 | 0           | 0           | 0.001084837 | 0           | 0.003838772 | 0.000405983 |
| 0           | 0           | 0           | 0           | 0           | 0           | 0           | 0           | 0           | 0           | 0           |
| 0           | 0           | 0           | 0           | 0           | 0           | 0           | 0           | 0           | 0           | 0           |
| 0           | 0           | 0           | 0           | 0           | 0           | 0           | 0           | 0           | 0           | 0           |
| 0           | 0           | 0           | 0           | 0           | 0           | 0           | 0           | 0.001318704 | 0           | 0           |
| 0           | 0.002174741 | 0.004468883 | 0.000174299 | 0.002762509 | 0.00023571  | 0           | 0.001683735 | 0.004897688 | 0.003604377 | 0.085534825 |
| 0           | 0           | 0.020716798 | 0.001095179 | 0.003895766 | 0.000611099 | 0           | 0.000151323 | 0.01147123  | 0.001923808 | 0.006025948 |
| 0.000738463 | 0.014463028 | 0.032221195 | 0.015968696 | 0.008777244 | 0           | 0.011228732 | 0.002497895 | 0.016191592 | 0.01570889  | 0.016540909 |
| 0.012660578 | 0.10233655  | 0.104846103 | 0.117773853 | 0.088265301 | 0.059885506 | 0.055390932 | 0.077159816 | 0.10795893  | 0.126668406 | 0.165394587 |
| 0.006050698 | 0.010283135 | 0.009161918 | 0.051694187 | 0.011197579 | 0.009271243 | 0.006268598 | 0.013561526 | 0.015986793 | 0.028868182 | 0.048474374 |
| 0           | 0.007422053 | 0           | 0.002904984 | 0.001218015 | 0.00668935  | 0           | 0.00141519  | 0.007632501 | 0.004247857 | 0           |
| 0           | 0.001773711 | 0           | 0.00081049  | 0.0001601   | 0           | 0           | 0           | 8.74E-05    | 0           | 4.93E-05    |

| H064        | H065        | H066        | H067        | H068        | H069        | H070        | H071        | H072        | H073        | H074        |
|-------------|-------------|-------------|-------------|-------------|-------------|-------------|-------------|-------------|-------------|-------------|
| 0.013495123 | 0.001608262 | 0.011371294 | 0.006143382 | 7.74E-05    | 0.019605789 | 0.015261507 | 0.010616104 | 0.000378191 | 0.056803892 | 0           |
| 0.003553064 | 0.003291817 | 0.001175023 | 0.005609283 | 0.006645837 | 0.005308265 | 0.005904552 | 0.028772413 | 0.006830424 | 0.00804269  | 0.003746227 |
| 0.001947666 | 0.001171561 | 0.00135227  | 0.003000892 | 0.005179448 | 0.000321713 | 0.001699409 | 0.00732623  | 0.003207311 | 0.014371239 | 0.001457416 |
| 0.008247019 | 0.003386686 | 0.004232529 | 0.007119666 | 0.003639066 | 0.03626379  | 0.019339068 | 0.060372706 | 0.007430097 | 0.018381106 | 0.00109368  |
| 0.003197214 | 0.000194256 | 0           | 0.005010595 | 0.000501128 | 0.006621303 | 0.020701657 | 0.024381051 | 0.002862552 | 0.010269544 | 0.001388133 |
| 0.008149229 | 0.003730023 | 0.001379774 | 0.018060003 | 0.002744435 | 0.009101485 | 0.003881082 | 0.004333004 | 0.007058175 | 0.017516383 | 0.00910823  |
| 0.000350417 | 0.00019275  | 5.65E-05    | 0.001818421 | 0.000464132 | 0.001155922 | 0.000216892 | 0.000384183 | 0.001652758 | 0.001721794 | 0.002951947 |
| 0.001225101 | 0.00103001  | 0.001317126 | 0.003003376 | 0.002102049 | 0.000411493 | 0.004419483 | 0.000880217 | 0.001548285 | 0.003981808 | 0.000386005 |
| 0.023518674 | 0.012314948 | 0.006684952 | 0.056112702 | 0.008764702 | 0.019953688 | 0.014710348 | 0.016663344 | 0.01250747  | 0.051786457 | 0.009573415 |
| 0.001007788 | 0.001347747 | 0.002360743 | 0.005840312 | 0.001079612 | 0.000549905 | 0.006690465 | 0.003309326 | 0.000543258 | 0.011044989 | 0.000571584 |
| 0.001062116 | 0.000894483 | 0.000773162 | 0.005070215 | 0.001890162 | 0.001331742 | 0.001653479 | 0.002599316 | 0.004187265 | 0.003423181 | 0.001261939 |
| 0.274368231 | 0.076216248 | 0.020647715 | 0.240036567 | 0.181556458 | 0.111597006 | 0.042551563 | 0.066449125 | 0.3817411   | 0.032362072 | 0.343554214 |
| 0.002719126 | 0.000173174 | 0.001274343 | 0.001177502 | 9.42E-05    | 0.000456384 | 7.40E-05    | 0.001743414 | 0.001552464 | 0.000826461 | 0.001160489 |
| 0.002205725 | 0.003806822 | 0           | 0.002196017 | 0.005132362 | 0.013212678 | 0           | 0.002098419 | 0.001592164 | 0.001364681 | 0.00555748  |
| 0.0038736   | 0.000281596 | 0           | 0.008093465 | 0.002946231 | 0.003501435 | 0.001081906 | 0.012857983 | 0.004615603 | 0.003137491 | 0.003199386 |
| 0.000646505 | 0.004058301 | 0.008492563 | 0.012348869 | 0.025853516 | 0.021176946 | 0.000418473 | 0.032200884 | 0.009972962 | 0.032981917 | 0.003008858 |
| 0.078409162 | 0.10911785  | 0.039084429 | 0.106983781 | 0.168698647 | 0.151134038 | 0.020089257 | 0.223281023 | 0.083145631 | 0.030494882 | 0.130390459 |
| 0.000179283 | 0.001501345 | 0.009985408 | 0.006873732 | 0.000941718 | 0.021375211 | 0.019479409 | 0.028580321 | 0.009728496 | 0.134542245 | 0.000626021 |
| 0           | 0.000162633 | 0.001043616 | 0.002178628 | 0.000726468 | 0.000127189 | 0           | 0.001402999 | 0           | 0.000278038 | 0.000170733 |
| 0.00147501  | 0.001356783 | 0           | 0.000402437 | 0.005186174 | 0.001283111 | 0.005059951 | 0.00742106  | 0.002613907 | 0.010810314 | 0.000826446 |
| 0.002797902 | 0.004663658 | 0.002762604 | 0.026764577 | 0.01331858  | 0.028415489 | 0.00657564  | 0.02884779  | 0.010942469 | 0.067751949 | 0.023246895 |
| 0.000464506 | 0.000459288 | 0.000113071 | 0.002282963 | 0.000723105 | 0.002880454 | 0.000678743 | 0.002356162 | 0.000704146 | 0.005453623 | 0.001895383 |
| 0.000426476 | 0.000176186 | 0.001129184 | 0           | 0.00057512  | 0.000392789 | 0.001400864 | 0.000398773 | 0.001659026 | 0.00417822  | 0.000539417 |
| 0.000277074 | 0.000147575 | 0.000256702 | 0.000998641 | 0.000501128 | 0.000905285 | 0.000806326 | 0.000928848 | 0.000369833 | 0.002698752 | 0.000482506 |
| 0.000285223 | 0.001227278 | 0.011038192 | 0           | 0.001587467 | 0.000127189 | 0.000193927 | 8.27E-05    | 0           | 8.93E-05    | 0           |
| 0.001662443 | 0.012963975 | 0.075051761 | 0.001430889 | 0.009955302 | 0.000815505 | 0.002186777 | 0.001235222 | 0.000440875 | 0.002165634 | 0.0002029   |
| 0.000154835 | 0.001005917 | 0.006400746 | 0.000404922 | 0.001227596 | 0.000149634 | 0           | 7.05E-05    | 0           | 0.000224471 | 0           |
| 0           | 0.000140045 | 0.002154464 | 0           | 0.000403593 | 0           | 0.000102067 | 0           | 0           | 0           | 0           |
| 0.000133104 | 0.002150372 | 0.012408798 | 9.44E-05    | 0.002546001 | 0           | 0.000178617 | 0.001991431 | 0.000221482 | 0.000104583 | 0           |
| 0.000138537 | 0.001323654 | 0.008156405 | 0.000263323 | 0.00139576  | 0.000115966 | 7.65E-05    | 0.001106351 | 6.69E-05    | 8.42E-05    | 0.000138566 |
| 8.15E-05    | 0.002233195 | 0.01798443  | 0.000300586 | 0.003010134 | 0.000303009 | 0           | 0.000418225 | 7.94E-05    | 6.12E-05    | 0           |
| 4.35E-05    | 0.000944176 | 0.005898037 | 0.00019625  | 0.00062557  | 0           | 0           | 0           | 0           | 0           | 0           |
| 0           | 0.001087233 | 0.004793301 | 0           | 0.001076249 | 0           | 0           | 0.001001794 | 0           | 0           | 0           |
| 0.000138537 | 0.000224374 | 0.002174328 | 0.00016644  | 0.000847546 | 0           | 0           | 0.000277196 | 0           | 0           | 0           |
| 0.006557413 | 0.03499927  | 0.002501318 | 0.01286061  | 0.062839481 | 0.081052974 | 0.01367182  | 0.003083193 | 0.021774197 | 0.000214268 | 0.10026476  |
| 0.108069638 | 0.022303338 | 0.008324484 | 0.093064909 | 0.031328932 | 0.02895043  | 0.010745061 | 0.005072192 | 0.014039039 | 0.011269459 | 0.024588014 |
| 0.194418865 | 0.179185659 | 0.088216913 | 0.161717762 | 0.055705969 | 0.155166674 | 0.363811269 | 0.026530533 | 0.041310589 | 0.078498494 | 0.150821498 |
| 0.002395873 | 0.003549319 | 0.000705931 | 0.001314132 | 0.001987697 | 0.004384275 | 0.001079354 | 0.000294216 | 0.002852104 | 0.000216818 | 0.002165091 |
| 0.000130388 | 0.00452813  | 0.000308654 | 0.000407406 | 0.007271406 | 0.001530007 | 0.001457001 | 0.000500897 | 0.003190596 | 0.000214268 | 0.000638393 |
| 0.000429193 | 0.00070625  | 0.001118488 | 0           | 0.011620125 | 0.00070328  | 0.000273028 | 0.003642447 | 0.011995554 | 0.000150498 | 0.004055525 |
| 0.021071189 | 0.007941922 | 0.00444492  | 0.010942822 | 0.022211086 | 0.032339639 | 9.44E-05    | 0.040558087 | 0.00489559  | 0.002974239 | 0.000497352 |
| 0.002591455 | 0.03315007  | 0.001877898 | 0.000161472 | 0.014092134 | 0.003826888 | 0.002699661 | 0.002285648 | 0.016799208 | 0.002272768 | 0.004082744 |
| 6.25E-05    | 0.055093507 | 0.001350742 | 0.000158988 | 0.02155861  | 0.001597343 | 0.004554722 | 0.002847333 | 0.01082546  | 0.001191226 | 0.001489583 |
| 0.000752445 | 0.006389377 | 0.008941791 | 0.001296743 | 0.00803487  | 0.011054209 | 0.007422793 | 0.004031493 | 0.003529087 | 0.001415697 | 0.000470134 |
| 8.96E-05    | 0.008679795 | 0.000545492 | 0.000340333 | 0.002044873 | 0.005592569 | 0.000724673 | 0.009259304 | 0.015127645 | 0.005652585 | 0.001657841 |
| 0.00017385  | 0.008097026 | 0           | 0.000491868 | 0.001072886 | 0.008798477 | 0           | 0.006477623 | 0.013593986 | 0.004545536 | 0.008974613 |
| 0.002778887 | 0.134452491 | 0           | 0.013352478 | 0.032509442 | 0           | 0.000204133 | 0.00742106  | 0.056116458 | 0.003231871 | 0.005451081 |
| 0           | 0.008407234 | 0.000226142 | 0           | 0.007463113 | 0.010545453 | 0.000283235 | 0.05864145  | 0.014126796 | 7.40E-05    | 0.018429257 |

|             |             |             |             |             |             |             |             |             |             |             |
|-------------|-------------|-------------|-------------|-------------|-------------|-------------|-------------|-------------|-------------|-------------|
| 0.000301521 | 0.002346135 | 0.00082817  | 0.001207312 | 0.007150328 | 0.000404012 | 0.000234753 | 0.006001041 | 0.014072471 | 6.38E-05    | 0.002484288 |
| 0.001901487 | 0.012530287 | 0.017419074 | 0.008187864 | 0.001335221 | 0.001208294 | 0.006598605 | 0.001082035 | 0.00026745  | 0.00918035  | 9.16E-05    |
| 0.000149403 | 0.00030569  | 0           | 0.000618561 | 0.000568394 | 0.000785578 | 8.68E-05    | 0.000160482 | 0           | 0.001571296 | 8.17E-05    |
| 0.011213339 | 0.00322857  | 0.005297538 | 0.005107478 | 0.01025127  | 0.003280725 | 0.002903795 | 0.00307833  | 0.018343314 | 0.002742116 | 0.021532142 |
| 0.000540566 | 0.00034936  | 0.000927489 | 0.002315258 | 0.002371111 | 0.001694605 | 0.000196478 | 0.002450992 | 0.004544562 | 0.004443503 | 0.000544366 |
| 0.001024086 | 0.001264925 | 0           | 0.004324961 | 0.004130105 | 0           | 0           | 0.002069241 | 0.001558732 | 0.007040224 | 0.002838125 |
| 0.027348811 | 0.002663872 | 0.012576877 | 0.023696612 | 0.033390621 | 0.012774999 | 0.000607296 | 0.067737841 | 0.042580977 | 0.032573788 | 0.020017816 |
| 0.009613373 | 0.001847694 | 0           | 0.001808484 | 0.011401511 | 0.000931471 | 0.000112273 | 0.002390204 | 0.009128823 | 0.002479383 | 0.007024793 |
| 0.007608663 | 0.002370228 | 0.056602822 | 0.00019625  | 7.74E-05    | 0.001372892 | 0           | 0.006601631 | 0.002269147 | 0.007517224 | 0.002647597 |
| 0.000244477 | 0.001516404 | 0.002589941 | 0.000571362 | 0.00038005  | 0.000160857 | 0           | 0.000155619 | 0.000965328 | 0.002022789 | 0.000249913 |
| 0.03127674  | 0.00888911  | 0.046739654 | 0.038045247 | 0.027393897 | 0.020937532 | 0.016356172 | 0.025144555 | 0.034657768 | 0.017126109 | 0.025206612 |
| 0.000926296 | 0           | 0.004139322 | 0.001088072 | 0.002855423 | 0.000688316 | 0.000607296 | 0.001128235 | 0.000808619 | 0.000484653 | 0.001548968 |
| 0.000377581 | 0.001737766 | 0.001278927 | 0.000857043 | 0.000329601 | 0.060800018 | 0.001056389 | 0.000340416 | 0.000234019 | 0.001918206 | 0           |
| 6.25E-05    | 0.000414112 | 0.02736017  | 0.003055544 | 0.000965261 | 0.001159663 | 0.001819337 | 0.007306778 | 0.000501469 | 0.010167511 | 0.000249913 |
| 0.001111012 | 0.001084221 | 0.021430045 | 0.000628498 | 0.001160331 | 0.001440227 | 0.001038528 | 0.010445896 | 0.000380281 | 0.006134688 | 0.000106399 |
| 0.000116806 | 0.000204797 | 5.65E-05    | 0.000154019 | 0           | 0.00039653  | 0.000191375 | 0.000141029 | 0.00015253  | 0.000142845 | 0           |
| 0           | 0           | 0           | 0           | 0           | 0.000583572 | 0.000523091 | 0.000318532 | 0           | 0.000150498 | 0           |
| 0           | 0           | 0           | 0           | 0           | 0.000280564 | 0.002128088 | 0.000649221 | 0           | 0.000270385 | 0           |
| 0.000152119 | 0           | 0           | 0           | 0           | 0           | 0           | 0           | 0           | 0           | 0           |
| 0           | 0           | 0           | 0           | 0           | 0           | 0.000939013 | 0           | 0.000173425 | 8.93E-05    | 7.92E-05    |
| 0           | 0           | 0           | 0           | 0           | 0           | 0.000847153 | 0           | 0           | 0           | 0           |
| 7.61E-05    | 0           | 0           | 0           | 0           | 0           | 9.95E-05    | 9.48E-05    | 0           | 0.000469348 | 0           |
| 0.000502536 | 2.26E-05    | 0           | 0.000832201 | 0           | 0.001582379 | 0.000181168 | 0.001889307 | 0.00034476  | 0.00164527  | 0.000522096 |
| 0.001781965 | 0           | 0           | 0.000305554 | 0           | 0.00031049  | 0.001663685 | 0.002618769 | 0.000679072 | 0.005828591 | 0.00044539  |
| 0.001219668 | 0           | 0           | 0.000156503 | 0           | 0.000149634 | 0.000696604 | 0.000483876 | 0.000409533 | 0.001941163 | 6.93E-05    |
| 7.61E-05    | 0           | 0           | 0           | 0           | 0.000127189 | 0.000308751 | 0.002331847 | 0           | 0.008101359 | 0           |
| 5.70E-05    | 0           | 0           | 0.000295618 | 0           | 0           | 0           | 0           | 0           | 0.000650455 | 9.65E-05    |
| 0           | 0           | 0           | 0           | 0           | 0           | 0           | 0           | 0           | 0           | 0           |
| 0.000124955 | 0           | 0           | 0.000104336 | 0           | 0           | 0.000561366 | 0           | 0           | 0.000288241 | 0           |
| 8.15E-05    | 0           | 0           | 0           | 0           | 0.000261859 | 0.000186272 | 7.54E-05    | 0           | 0.00053822  | 8.91E-05    |
| 0.000228178 | 0           | 0           | 0           | 0           | 0           | 0.000119928 | 0           | 0           | 0.000497407 | 0           |
| 0           | 0           | 0           | 0.000109304 | 0           | 0.000138411 | 0.000387853 | 0           | 7.73E-05    | 0.000339257 | 0           |
| 0.000187432 | 0           | 0           | 0.000171409 | 0           | 0.000123448 | 0.000252615 | 0           | 7.73E-05    | 0.000517814 | 0           |
| 0.000184716 | 0           | 0           | 8.69E-05    | 0           | 0           | 0.00044399  | 8.51E-05    | 7.10E-05    | 0.000770343 | 0           |
| 0.000336835 | 0           | 0           | 0.000158988 | 0           | 0           | 0.000201582 | 0           | 0           | 0.000670862 | 8.41E-05    |
| 0.000184716 | 0.000554158 | 0.00611654  | 0.000263323 | 0.000776917 | 0.00013093  | 9.95E-05    | 7.29E-05    | 0           | 0.000257631 | 0           |
| 0           | 0           | 0           | 0           | 0           | 0           | 0           | 0           | 0           | 0           | 0           |
| 0           | 0           | 0           | 0           | 0           | 0           | 0           | 0           | 0           | 0           | 0           |
| 0           | 0           | 0           | 0           | 0           | 0           | 0           | 0           | 0           | 0           | 0           |
| 0           | 0           | 0           | 0.000270776 | 0           | 0.000280564 | 0.000880324 | 0           | 0           | 0           | 0           |
| 5.70E-05    | 0.011068094 | 0.001980274 | 0.003338741 | 0.009588705 | 0.000299268 | 0.007956091 | 0.000593296 | 0.001013385 | 0.00326248  | 0.006411145 |
| 0           | 0.003371627 | 0.000799138 | 0.007010362 | 0.00080046  | 0.001066142 | 0.007040043 | 0.000179934 | 0.000158798 | 0.001943714 | 0.000729945 |
| 0.004525538 | 0.015557071 | 0.008886784 | 0.006446452 | 0.019806342 | 0.003995227 | 0.061579327 | 0.003700804 | 0.0126997   | 0.003907834 | 0.007838868 |
| 0.106415344 | 0.132050639 | 0.362906541 | 0.05742435  | 0.113137299 | 0.063355018 | 0.254025889 | 0.095075645 | 0.06069654  | 0.192682759 | 0.026282971 |
| 0.012916527 | 0.033475336 | 0.038997334 | 0.004347318 | 0.010093196 | 0.010077847 | 0.021469708 | 0.009988766 | 0.005305123 | 0.025533565 | 0.002528827 |
| 0.001230534 | 0.000415618 | 0.001810667 | 0.000621045 | 0.000279152 | 0.004919216 | 0.003146203 | 0.000335553 | 0           | 0.004940911 | 7.42E-05    |
| 8.96E-05    | 0.000664086 | 0.00113988  | 0.000101851 | 0           | 0.000145893 | 0           | 0.000238291 | 0           | 0.000219369 | 0           |

| H075        | H076        | H077        | H078        | H079        | H080        | H081        | H082        | H083        | H084        | H085        |
|-------------|-------------|-------------|-------------|-------------|-------------|-------------|-------------|-------------|-------------|-------------|
| 0.000648167 | 0.002019855 | 0.000715103 | 0.01258116  | 0.019192669 | 0.012654137 | 0.015749301 | 0.002627953 | 0.002584129 | 4.03E-05    | 0.010358045 |
| 0.002042339 | 0.024399851 | 0.005828884 | 0.006442504 | 0.013299015 | 0.019003677 | 0.00285009  | 0.008926659 | 0.008658965 | 0.001631387 | 0.008366967 |
| 5.30E-05    | 0.006594827 | 0.000505339 | 0.003970593 | 0.020724353 | 0.006888833 | 0.000490533 | 0.003372811 | 0.001413862 | 0.000555405 | 0.033014486 |
| 0.002248203 | 0.074950093 | 0.001922832 | 0.01618622  | 0.066897973 | 0.01277612  | 0.008529831 | 0.009427111 | 0.003498242 | 0.00126295  | 0.005104516 |
| 0.000201788 | 0.047634918 | 0.000556191 | 0.016791633 | 0.010605248 | 0.014132914 | 0.000174866 | 0.000800723 | 7.28E-05    | 0.000450923 | 0.076127036 |
| 0.002531522 | 0.00990739  | 0.016164505 | 0.010090972 | 0.015966143 | 0.020469613 | 0.024578902 | 0.003696359 | 0.014040683 | 0.003083138 | 0.020072478 |
| 0.000654282 | 0.001188348 | 0.004064963 | 0.001583211 | 0.001698172 | 0.001326833 | 0.002075683 | 0.000621491 | 0.002066801 | 0.000911011 | 0.001192111 |
| 0           | 0.002036687 | 0.001401602 | 0.001905336 | 0.017001695 | 0.007479488 | 0           | 0.005595747 | 0.00216223  | 0.000137476 | 0.003741198 |
| 0.001975076 | 0.021922162 | 0.02040745  | 0.031853842 | 0.033294153 | 0.050197099 | 0.009311105 | 0.016119196 | 0.017870417 | 0.002412253 | 0.052909415 |
| 0.000572752 | 0.017151937 | 0.004424104 | 0.002736922 | 0.007828238 | 0.001521578 | 0.002155168 | 0.001878439 | 0.008299849 | 0.0007772   | 0.00149965  |
| 0.002992169 | 0.002901859 | 0.000772311 | 0.003413156 | 0.003769275 | 0.00159006  | 0.002255091 | 0.002704766 | 0.002772476 | 0.00056457  | 0.002048147 |
| 0.062654144 | 0.18674571  | 0.219482583 | 0.178283735 | 0.143185837 | 0.047725337 | 0.181265712 | 0.227323725 | 0.178329985 | 0.089671303 | 0.026575187 |
| 0.000163061 | 0.000966164 | 0.000667429 | 0.00061912  | 0.000376262 | 0           | 0           | 0.000111729 | 0.001067303 | 0.000542574 | 0.000339244 |
| 0           | 0.004107039 | 0.016008772 | 0.004425224 | 0.003033401 | 0           | 0.005002986 | 0.007928084 | 0.000165746 | 0.000483917 | 7.61E-05    |
| 0.001271876 | 0.003218303 | 0.002459954 | 0.006604709 | 0.01085165  | 0.010805131 | 0.006517735 | 0.007162277 | 0.004944751 | 0.001052153 | 0.001547207 |
| 0.003601609 | 0.025069769 | 0.02265764  | 0.030672716 | 0.040503058 | 0.001076447 | 0.00101059  | 0.039202816 | 0.004892014 | 0.004967482 | 0.01332881  |
| 0.041417489 | 0.115350563 | 0.172018815 | 0.118420993 | 0.178328    | 0.143233792 | 0.07825143  | 0.204735901 | 0.042619287 | 0.024789753 | 0.013417584 |
| 0.0004688   | 0.092388176 | 0.00178299  | 0.054944051 | 0.007515242 | 0.002854832 | 0.000638148 | 0.002807184 | 0.005394274 | 0.007071788 | 0.021014118 |
| 4.89E-05    | 0.002093917 | 0.000435418 | 0.000742487 | 0.001178731 | 0.000239686 | 0.000265706 | 0.000225785 | 0.000610246 | 0.000284118 | 0.000798968 |
| 0.000450456 | 0.004352788 | 0.001709891 | 0.006172924 | 0.006493009 | 0.001953869 | 0.000186221 | 0.002350959 | 0.003395279 | 0.000626893 | 0.004904774 |
| 0.007172645 | 0.016047749 | 0.011505212 | 0.066184164 | 0.059199595 | 0.022975616 | 0.00301133  | 0.046239397 | 0.018086389 | 0.001829353 | 0.014352884 |
| 0.000733774 | 0.001757274 | 0.000543478 | 0.004813601 | 0.005537371 | 0.0024097   | 0.000186221 | 0.004704245 | 0.001579608 | 0.000124645 | 0.001433069 |
| 7.95E-05    | 0.00125231  | 0.000645182 | 0.00231656  | 0.004042314 | 0.000873142 | 0.000476907 | 0.000197853 | 0.001722752 | 0.000223628 | 0.002108387 |
| 0.000226247 | 0.001349937 | 0.000117595 | 0.001658602 | 0.000945649 | 0           | 0.000190763 | 0.000114056 | 0.001531894 | 0.000119146 | 0.000488258 |
| 0.004478062 | 8.75E-05    | 0           | 0           | 0           | 0.00038949  | 0.001228604 | 0.000169921 | 0.000178302 | 0.000931174 | 0.000405825 |
| 0.077943149 | 0.00112102  | 0.000527587 | 0.000306133 | 0.000472824 | 0.002732849 | 0.018526719 | 0.002076292 | 0.002147162 | 0.0106975   | 0.005018912 |
| 0.006616199 | 0           | 0           | 0           | 0           | 0.000235406 | 0.001346696 | 0.000225785 | 0.000306379 | 0.001233622 | 0           |
| 0.000122296 | 0           | 0           | 0           | 0           | 7.28E-05    | 0.000806201 | 4.19E-05    | 0.000107986 | 0.000185135 | 0           |
| 0.00091518  | 8.42E-05    | 0.000114416 | 9.60E-05    | 0.000239742 | 0           | 0.003265681 | 0.000593559 | 0.000778503 | 0.001569065 | 0.000510452 |
| 0.0006339   | 0           | 0.000136664 | 0           | 0.000356283 | 0           | 0.002704747 | 0.000281649 | 0.00283777  | 0.000920176 | 8.24E-05    |
| 0.001597998 | 7.07E-05    | 0           | 8.00E-05    | 0           | 0           | 0.006479128 | 0.000432949 | 0.000185836 | 0.001624055 | 0.000424848 |
| 0.000338352 | 8.75E-05    | 0           | 0           | 0           | 7.70E-05    | 0.00234366  | 0.000109401 | 0.000165746 | 0.000784532 | 7.93E-05    |
| 0.000497336 | 0           | 0.000146199 | 0           | 0           | 8.99E-05    | 0.001660092 | 0.000148972 | 0.00025113  | 0.000450923 | 0.000149014 |
| 0.000171214 | 0           | 0           | 0           | 0           | 0           | 0.000769865 | 0.00013035  | 0.000399297 | 0.000353773 | 0.000110968 |
| 0.072918832 | 0.016906188 | 0.049777524 | 0.008420947 | 0.00860074  | 0.000361669 | 0.044847469 | 0.053836951 | 0.086983928 | 0.030836883 | 0.000707023 |
| 0.040096695 | 0.027342106 | 0.006524917 | 0.017470152 | 0.008823833 | 0.002129353 | 0.186252802 | 0.047619713 | 0.056336012 | 0.007804996 | 0.001924498 |
| 0.163658192 | 0.049149809 | 0.085821892 | 0.064701474 | 0.026667954 | 0.116630785 | 0.147988927 | 0.045745929 | 0.187827725 | 0.117348061 | 0.005735447 |
| 0.005105847 | 0.001326372 | 0.002625222 | 0.003113877 | 0.000576046 | 0.001635001 | 0.001212708 | 0.001508338 | 0.000971873 | 0.002162963 | 0           |
| 0.00058702  | 0.003262066 | 0.002221587 | 0.000925253 | 0.00119538  | 0.001307573 | 0.004955296 | 0.000256045 | 0.004412356 | 0.003433245 | 0.00106212  |
| 0.000301663 | 0.003241868 | 0.003956903 | 0           | 0.000119871 | 0.000633456 | 8.40E-05    | 0.000118712 | 0.000459568 | 0.003708198 | 0.000279005 |
| 0.145937539 | 0.003322662 | 0.006010043 | 0.001708863 | 0.00026971  | 0.112909232 | 0.008021129 | 0.002020428 | 0.000273732 | 0.251717539 | 0.00094164  |
| 0.011287896 | 0.00014139  | 0.004198449 | 0.006830882 | 0.001238666 | 0.045895591 | 0           | 0.000726237 | 0.006818182 | 0.021822094 | 0.000234617 |
| 0.010423673 | 0.000521796 | 0.002167557 | 0.000986937 | 0.002477333 | 0.001275472 | 0.000669941 | 0.000577265 | 0.004206429 | 0.003154626 | 0           |
| 0.003128733 | 0.005685892 | 0.004201627 | 0.000970945 | 0.001894627 | 0.001823326 | 0.002495816 | 0.000945039 | 0.025610246 | 0.004186616 | 0.002181309 |
| 0.000444341 | 0.005978771 | 0.009054793 | 0.0030956   | 0.002710415 | 0.003631671 | 0.001616943 | 0.006028696 | 0.001388749 | 0.002172128 | 0.000212424 |
| 0.003016628 | 0.007187318 | 0.001096491 | 0.012400678 | 0.011444345 | 0           | 0.003404211 | 0           | 0           | 0.000562737 | 0.000396313 |
| 0.013385268 | 0.015593282 | 0.015331808 | 0.012169936 | 0.000805799 | 0.008609436 | 0           | 0.025460183 | 0.035248619 | 0.014194901 | 0.000592885 |
| 0.019736493 | 0.012236956 | 0.005768497 | 0.06841391  | 0.05357232  | 0           | 0.001467058 | 0.010621212 | 0.012325465 | 0.006158945 | 0.000447041 |

|             |             |             |             |             |             |             |             |             |             |             |
|-------------|-------------|-------------|-------------|-------------|-------------|-------------|-------------|-------------|-------------|-------------|
| 0.000536063 | 0.067372269 | 0.009661836 | 0.031696206 | 0           | 0.001446676 | 0.000190763 | 0.003291342 | 0.002910598 | 0.001658882 | 0.001823041 |
| 0.014573575 | 0.000541994 | 0.004351004 | 0.000390662 | 0.003476257 | 0.008249907 | 0.016818936 | 0.004729849 | 0.008955299 | 0.009216421 | 0.048343886 |
| 0.000383193 | 9.76E-05    | 0.000266972 | 0.000150782 | 0           | 0.000243966 | 0.000887956 | 0.001571185 | 0.000911602 | 0.000850521 | 0           |
| 0.001487931 | 0.006126894 | 0.014422832 | 0.006421943 | 0.000719226 | 0.001949589 | 0.000924292 | 0.010286026 | 0.005665495 | 0.005768512 | 0.002843944 |
| 0.002303236 | 0.003359692 | 0.001179125 | 0.000253588 | 0.001495057 | 0.000742599 | 0.001167288 | 0.005146504 | 0.001361125 | 0.0001943   | 0.029942265 |
| 0.005012087 | 0.001043592 | 0.011597381 | 0.004007146 | 0.00238077  | 0.002841991 | 0.000361087 | 0.000507435 | 0.005703164 | 0.002826516 | 0.001797677 |
| 0.006599893 | 0.013421938 | 0.063370837 | 0.032648874 | 0.006153375 | 0.009807866 | 0.000999235 | 0.018686629 | 0.008588649 | 0.003743025 | 0.014159483 |
| 0.001463472 | 0.004628835 | 0.005174167 | 0.000726495 | 0.003000103 | 0.001814766 | 0.000565476 | 0.002988743 | 0.004708689 | 0.002283942 | 0.00244129  |
| 0.007258252 | 0           | 0.00691584  | 0.004674242 | 0.003499565 | 0.009621681 | 0           | 0.003256427 | 0.008440482 | 0.024555126 | 0.009482985 |
| 0.001736599 | 0           | 0.000127129 | 0.000187335 | 0           | 0.000967304 | 0           | 0           | 0.000389252 | 0.000221795 | 0.002472995 |
| 0.012482318 | 0.025089968 | 0.03456331  | 0.013526974 | 0.040120137 | 0.010920694 | 0.033481175 | 0.026160815 | 0.024909593 | 0.030813054 | 0.024248035 |
| 0.000254783 | 0           | 0.00032418  | 0.00067395  | 0.000216434 | 0.000160504 | 9.08E-05    | 0.0002607   | 0.000668006 | 0.004083967 | 0.001109677 |
| 0.000911103 | 0.000952698 | 0.000959827 | 0           | 0.000229753 | 0.000995125 | 0.00266614  | 0.030906958 | 0.001818182 | 0.000196133 | 0.007298506 |
| 0.006173896 | 0.005773419 | 0.001700356 | 0.000705934 | 0.014267971 | 0.021199372 | 8.86E-05    | 0.000311909 | 0.001182823 | 0.000172304 | 0.218413035 |
| 0.002303236 | 0.001434097 | 0.001906941 | 0.000980083 | 0.012163571 | 0.005686123 | 0.003031769 | 0.001000903 | 0.00221999  | 0.001072316 | 0.092290279 |
| 0           | 0.001245577 | 0.000289219 | 0.000235311 | 0.000206444 | 0.000194745 | 7.95E-05    | 0.000137333 | 6.78E-05    | 4.40E-05    | 0           |
| 0           | 0.000356841 | 0           | 0.001274793 | 0.000909021 | 0           | 0           | 5.35E-05    | 0           | 0           | 0           |
| 0           | 7.07E-05    | 0.000152555 | 0.000641966 | 0.000246401 | 0           | 0           | 0           | 0           | 0           | 0           |
| 0           | 0           | 0           | 0           | 0           | 0           | 0           | 0           | 4.77E-05    | 0           | 0           |
| 0           | 0.000111092 | 0.000139842 | 0.0004592   | 0           | 7.70E-05    | 0           | 0           | 0.000246107 | 0           | 0           |
| 0           | 0           | 0           | 9.60E-05    | 0.000123201 | 8.56E-05    | 0           | 0           | 0           | 0           | 0           |
| 0           | 0           | 0           | 0           | 0           | 0.000100583 | 0           | 0           | 5.52E-05    | 0           | 0           |
| 0           | 0.004006046 | 0.003594584 | 0.007778981 | 0.002603863 | 0.001876827 | 0           | 0.000216474 | 0.0014666   | 0           | 0           |
| 0           | 0.006857408 | 0           | 0.014481927 | 0.007661751 | 0.001688502 | 0           | 0.000123367 | 0.002405826 | 0           | 0           |
| 0           | 0.000848339 | 0           | 0.010753499 | 0.001971211 | 0.000819641 | 0           | 0           | 0.001250628 | 0           | 8.56E-05    |
| 0           | 0.001841435 | 0           | 0.001528381 | 0.003872497 | 0.000164784 | 0           | 0           | 8.29E-05    | 0           | 0           |
| 0           | 0.000154856 | 0.000187516 | 0.000719641 | 0.001348548 | 0.000151944 | 0           | 0           | 0.000233551 | 0           | 0           |
| 0           | 0           | 0           | 0           | 0           | 0           | 0           | 0           | 0           | 0           | 0           |
| 0           | 0           | 0.000251081 | 0.000187335 | 8.32E-05    | 8.99E-05    | 0           | 0           | 0.000155701 | 0           | 0           |
| 0           | 0           | 0           | 0.000559721 | 0.000206444 | 0.000248246 | 0           | 0           | 0.000570065 | 0           | 0           |
| 0           | 0           | 0           | 9.82E-05    | 0           | 0.000173344 | 0           | 0           | 0.000248619 | 0           | 0           |
| 0           | 0           | 0           | 0.000205612 | 0           | 0           | 0           | 0           | 0.000130588 | 0           | 0           |
| 0           | 0.00018852  | 0.000317824 | 0.000870423 | 0.000352953 | 8.99E-05    | 0           | 0           | 0.00017328  | 0           | 0           |
| 0           | 0.000117825 | 0           | 0.000845293 | 0.000143179 | 0           | 0           | 0           | 0.000246107 | 0           | 0           |
| 0           | 0.000158222 | 0.000133486 | 0.000347256 | 0           | 0.000231126 | 0           | 0           | 0           | 0           | 0           |
| 0.005968032 | 0           | 0           | 0           | 0           | 0.000237546 | 0.000844807 | 9.54E-05    | 0.000138122 | 0.000579234 | 0.0004407   |
| 0           | 0           | 0           | 0           | 0           | 0           | 0           | 0           | 0           | 0           | 0           |
| 0           | 0           | 0           | 0           | 0           | 0           | 0           | 0           | 0           | 0           | 0           |
| 0           | 0           | 0           | 0           | 0           | 0           | 0           | 0           | 0           | 0           | 0           |
| 0           | 0           | 0.000333715 | 0           | 0           | 0           | 0           | 0.000148972 | 0           | 0           | 0           |
| 0.000994672 | 0.000333276 | 0.002243834 | 0.000719641 | 0           | 0.001793365 | 0.003193009 | 0.005588764 | 0.002061778 | 0.005845498 | 0           |
| 0.000811228 | 0           | 0.000451309 | 0.000121083 | 0           | 0.001311853 | 0.003065834 | 0.008065417 | 0.001325967 | 0.000762536 | 0           |
| 0.056337569 | 0.003844458 | 0.001217264 | 0.009949328 | 0.003735978 | 0.018866713 | 0.014995333 | 0.003314619 | 0.016049724 | 0.023589125 | 0.0025047   |
| 0.141221001 | 0.025719489 | 0.103372108 | 0.061962268 | 0.077206874 | 0.175266116 | 0.10622773  | 0.054784317 | 0.122918132 | 0.194333038 | 0.139644967 |
| 0.015203398 | 0.002518086 | 0.015989703 | 0.003822096 | 0.016905132 | 0.031411708 | 0.021335931 | 0.00851466  | 0.010818684 | 0.055183045 | 0.030481251 |
| 0.000324084 | 0.00194916  | 0.0081776   | 0.000191904 | 0.001638236 | 0.005435736 | 0.001321715 | 0.011163562 | 0.002820191 | 0.000379435 | 0.025722321 |
| 0.000110066 | 0.001080623 | 0.000146199 | 0           | 0.00012986  | 0.00040875  | 0.000340648 | 0.000137333 | 5.27E-05    | 0           | 0.008138691 |

| H086        | H087        | H088        | H089        | H090        | H091        | H092        | H093        | H094        | H095        | H096        |
|-------------|-------------|-------------|-------------|-------------|-------------|-------------|-------------|-------------|-------------|-------------|
| 0.014205615 | 0.000328389 | 0.007173993 | 0.001086669 | 0.017296721 | 0.016655842 | 0.00168143  | 0.01000084  | 0.011901763 | 0.026864048 | 0.000869689 |
| 0.013962404 | 0.00365124  | 0.006111554 | 0.008059465 | 0.00481297  | 0.012345473 | 0.017464948 | 0.007777829 | 0.04572838  | 0.022133583 | 0.002565218 |
| 0.004032596 | 0.000153063 | 0.004146548 | 0.003005949 | 0.004345962 | 0.011845881 | 0.005727233 | 0.003819784 | 0.011041142 | 0.007292309 | 0.001580422 |
| 0.005321875 | 0.012782122 | 0.005476114 | 0.002933001 | 0.06183325  | 0.013677719 | 0.007989887 | 0.001653704 | 0.035418416 | 0.022493843 | 0.002936114 |
| 0.001320662 | 0.000289428 | 4.65E-05    | 0.00255317  | 0.05365364  | 0.00048849  | 0.002181792 | 0.002315185 | 0.014847467 | 0.010791299 | 0.000314257 |
| 0.015337985 | 0.000812623 | 0.005429569 | 0.003408419 | 0.011528824 | 0.017699434 | 0.006773458 | 0.014430597 | 0.027672824 | 0.015971499 | 0.001211353 |
| 0.001098372 | 0.000428575 | 0.000254985 | 0.00040247  | 0.001191916 | 0.000952    | 0.001506392 | 0.001954623 | 0.003732858 | 0.002114464 | 7.86E-05    |
| 0.003927989 | 0           | 0.003290525 | 0.004864858 | 0.001411479 | 0.003347266 | 0.000507435 | 0.00274081  | 0.016554716 | 0.001660019 | 0.000767373 |
| 0.020034834 | 0.003821    | 0.046225205 | 0.031598938 | 0.043173842 | 0.019750537 | 0.007424106 | 0.017857288 | 0.045563952 | 0.028427527 | 0.009393008 |
| 0.004767459 | 0.002148443 | 0.002458787 | 0.002422367 | 0.014128734 | 0.002439674 | 0.001143938 | 0.001848895 | 0.01374895  | 0.004671599 | 0.001730243 |
| 0.006998201 | 0.001984248 | 0.001833466 | 0.005383038 | 0.001355717 | 0.002178776 | 0.003976379 | 0.00145309  | 0.001444864 | 0.00356492  | 0.002113929 |
| 0.167606385 | 0.140160855 | 0.047447516 | 0.442027947 | 0.025643617 | 0.058629897 | 0.16047667  | 0.177483063 | 0.084228939 | 0.236808149 | 0.096155462 |
| 0.001791393 | 0.000979601 | 0.000313672 | 0.000701807 | 0           | 0.000957551 | 0.000717834 | 0.000241278 | 0.000402323 | 0.002196876 | 0.000548123 |
| 0.006632077 | 0.010288593 | 0.000396644 | 0.002487769 | 0.001759993 | 0.000105469 | 0.009786241 | 0.004077328 | 0.003078645 | 0.000706391 | 0.000385513 |
| 0.005397715 | 0.001171625 | 0.00219166  | 0.001994743 | 0.009270457 | 0.001998368 | 0.002061564 | 0.002363983 | 0.005758466 | 0.009769387 | 0.000511582 |
| 0.048725888 | 0.012587315 | 0.004472362 | 0.023775925 | 0.024026515 | 0.03345046  | 0.024192436 | 0.001827207 | 0.001427372 | 0.011372894 | 0.036497711 |
| 0.129165969 | 0.268338296 | 0.111428606 | 0.100544592 | 0.154753897 | 0.126568858 | 0.195410103 | 0.081272755 | 0.155737476 | 0.029656647 | 0.024174069 |
| 0.002031989 | 0.000102969 | 0.008799019 | 0.002671396 | 0.091519623 | 0.010472003 | 0.012905108 | 0.01476676  | 0.071134201 | 0.02283291  | 0.007089063 |
| 0.002086907 | 0           | 0.000736624 | 0.002107937 | 0.000526255 | 8.60E-05    | 0.000153822 | 0.000891916 | 0.000647215 | 0.000525084 | 0.000438499 |
| 0.007798443 | 0.003186486 | 0.001586576 | 0.006364059 | 0           | 0.000366367 | 0.002551318 | 0.003283008 | 0.008130423 | 0.00602316  | 0.0020445   |
| 0.038550253 | 0.00668188  | 0.017958255 | 0.047823517 | 0.100225488 | 0.014737964 | 0.018669001 | 0.015937907 | 0.089634061 | 0.039722718 | 0.010079989 |
| 0.003904452 | 0.000748615 | 0.001691808 | 0.001546995 | 0.007472128 | 0.001423837 | 0.001904206 | 0.00095969  | 0.0047719   | 0.003291782 | 0.00072535  |
| 0.000959768 | 0.000242117 | 0.002373792 | 0.001038876 | 0           | 0.001745796 | 0.001923655 | 0.001556108 | 0.007024909 | 0.001504613 | 0.001061532 |
| 0.001618792 | 0.00059277  | 0.000566634 | 0.000767209 | 0.000153346 | 0.000527347 | 0.001253558 | 0.000824141 | 0.000997061 | 0.000485055 | 0.000436672 |
| 0.000149065 | 0.000178109 | 0           | 0           | 0           | 0.001842939 | 6.37E-05    | 7.32E-05    | 0           | 6.36E-05    | 0.001468971 |
| 0.002149672 | 0.004352545 | 0.003960368 | 0.000691746 | 0.000285781 | 0.027122295 | 0.001897134 | 0.000539487 | 0.001154492 | 0.000694618 | 0.013085533 |
| 0.000201368 | 0.000205939 | 0.000271175 | 0           | 0.000188197 | 0.002556246 | 0.000291731 | 0           | 0.00040932  | 7.77E-05    | 0.001059705 |
| 0           | 0           | 0           | 0           | 0           | 0.000618939 | 0           | 0           | 0           | 0.000209563 | 0.000330701 |
| 7.58E-05    | 0.000740267 | 0           | 0.000120741 | 0           | 0.005431675 | 0.000199791 | 0.0002467   | 0           | 0.00265603  | 0.001812461 |
| 0.000219674 | 0.000570506 | 0.000167967 | 0.000166019 | 0.000365939 | 0.003486042 | 0           | 9.22E-05    | 0.000293871 | 0.002338154 | 0.000791125 |
| 0.000185677 | 0.000567723 | 0.000190227 | 0           | 0.00052974  | 0.007760329 | 0.000150286 | 0.000721123 | 0.000108452 | 0.002867947 | 0.001671776 |
| 8.37E-05    | 0.00015028  | 0           | 0           | 0           | 0.003677552 | 8.66E-05    | 0.000184347 | 0           | 0.000831187 | 0.000506101 |
| 6.54E-05    | 0.000436924 | 5.06E-05    | 0           | 0           | 0.002722276 | 0           | 0           | 0           | 0.001127871 | 0.000617552 |
| 0           | 4.73E-05    | 0           | 0           | 0           | 0.001476572 | 7.43E-05    | 0           | 0.000101455 | 0.000623979 | 0.000191843 |
| 0.019038453 | 0.066721398 | 0.005935493 | 0.025257518 | 0.001097817 | 0.04436377  | 0.0221238   | 0.152604312 | 0.011982228 | 0.031608641 | 0.040520936 |
| 0.024582619 | 0.051003256 | 0.007740627 | 0.013445019 | 0.010873619 | 0.056192998 | 0.03249527  | 0.034453966 | 0.024160369 | 0.053838764 | 0.020055836 |
| 0.055104293 | 0.117184761 | 0.050149146 | 0.033055377 | 0.127974126 | 0.055923773 | 0.064649304 | 0.138924659 | 0.065897005 | 0.107540959 | 0.286109457 |
| 0.001882924 | 0.005145688 | 0.000943041 | 0.00191928  | 0.000320632 | 0.003622042 | 0.001587723 | 0.00131483  | 0.001714246 | 0.005161363 | 0.003409328 |
| 0.001542952 | 0.000119667 | 0.001023989 | 0.002958156 | 0.000160316 | 0.003008654 | 0.005496915 | 0.000338874 | 0.001325917 | 0.000506247 | 0.000297814 |
| 0.000292899 | 0.000128016 | 0.000392597 | 0.007654479 | 0.000160316 | 0.000113796 | 0.003926873 | 0           | 0.000388329 | 0           | 4.38E-05    |
| 0.00121867  | 0.023849943 | 0.044608274 | 0.00043014  | 0.044477282 | 0           | 0.000369526 | 0.004058351 | 0.000566751 | 0.00265603  | 0.006029357 |
| 0.001924767 | 0.020003896 | 0.029250464 | 0.000296822 | 0.000146376 | 0.003402777 | 0.009851659 | 0.002952268 | 0.004520011 | 0.002295771 | 0.003212003 |
| 0.000538725 | 0.010770044 | 0.002608541 | 0.00019872  | 0.001536944 | 0.000793796 | 0.006810587 | 0.000742811 | 0.001007557 | 0.001214992 | 0.003113341 |
| 0.005562471 | 8.63E-05    | 0.00687651  | 0.001214957 | 0.017077157 | 0.008318207 | 0.002593752 | 0.000181636 | 0.009564791 | 0.000595723 | 0.002033538 |
| 0.000931001 | 0.000556591 | 0.002649015 | 0.001989712 | 0.027034186 | 0.001065796 | 0.020228434 | 0.002187769 | 0.010288973 | 8.71E-05    | 0.000407438 |
| 0.00683083  | 0.036929842 | 0.000431047 | 0.000465356 | 0           | 0.00472392  | 0.02251631  | 0.012814848 | 0.000479289 | 0.002674867 | 0.010231637 |
| 0.016899243 | 0.006687446 | 0.002031788 | 0.003848621 | 0.000195168 | 0.008085064 | 0.019535352 | 0.015043281 | 0.002455919 | 0.054997245 | 0.019211725 |
| 0.013907486 | 0.04868227  | 0.000283317 | 0.010866694 | 0           | 0.004141063 | 0.00753903  | 0.018898308 | 0.033672684 | 0.064312187 | 0.037433175 |



|             |             |             |             |             |             |             |             |             |             |             |
|-------------|-------------|-------------|-------------|-------------|-------------|-------------|-------------|-------------|-------------|-------------|
| 0.01237238  | 0.006676314 | 5.46E-05    | 0.017638255 | 0           | 0.000388572 | 0.011305009 | 0.003147459 | 0.00127344  | 0.01615987  | 0.002673015 |
| 0.00144096  | 0.002919322 | 0.005907161 | 0.001642581 | 0.001519518 | 0.00562041  | 0.000235153 | 0.003198968 | 0.003722362 | 0.001106679 | 0.007659111 |
| 0.000651178 | 0.000108535 | 0.000157848 | 0           | 0.000832947 | 0.001623674 | 0.000252833 | 0           | 0.000104954 | 0.000190726 | 0.000577357 |
| 0.023641157 | 0.005616008 | 0.004106074 | 0.024183426 | 0.000940986 | 0.012764576 | 0.006009654 | 0.010404778 | 0.002263504 | 0.003254108 | 0.005128608 |
| 0.006362714 | 0.000381265 | 0.001193979 | 0.004150474 | 0.001421935 | 0.025440335 | 0.00048445  | 0.000276521 | 0.000913098 | 0.003571984 | 0.001759476 |
| 0.007123729 | 0.001641945 | 0.048303538 | 0.002080268 | 0.000738848 | 0.004662859 | 0.005489842 | 0.001591351 | 0.001917156 | 0.001478712 | 0.003623096 |
| 0.050632349 | 0.004422119 | 0.03366414  | 0.026638494 | 0.000526255 | 0.026725396 | 0.025859722 | 0.001924803 | 0.0072733   | 0.020122724 | 0.013631829 |
| 0.021951755 | 0.004313584 | 0.008335593 | 0.006270988 | 0           | 0.013178127 | 0.012268604 | 0.001472067 | 0.000731178 | 0.009529214 | 0.003765608 |
| 0.040998054 | 0.000798709 | 0.126841055 | 0.00312669  | 0.001139639 | 0           | 0.025691756 | 0.002133549 | 0.009645256 | 0.002477078 | 0.002287502 |
| 0.001014687 | 6.96E-05    | 0.002353555 | 8.80E-05    | 0           | 0.002381389 | 0.000742587 | 0           | 0.000601735 | 0           | 0.00171928  |
| 0.041942131 | 0.015303481 | 0.07647335  | 0.062400483 | 0.004861762 | 0.059901081 | 0.04305062  | 0.016293047 | 0.02774979  | 0.024205663 | 0.048762885 |
| 0.006187497 | 0.000230985 | 0.003689193 | 0.000445233 | 0           | 0.002159348 | 0.002800615 | 0.000490689 | 0.000444305 | 7.53E-05    | 0.000160783 |
| 0.002931608 | 0.000626165 | 0.001730258 | 0.006235772 | 0.001892428 | 0.012870045 | 0.000293499 | 0.000376828 | 0.001290932 | 0.000376742 | 0.000129723 |
| 0.000162141 | 0.000968469 | 0.002709725 | 0.000372285 | 0.000975838 | 0.024940743 | 0.000495058 | 0.001702501 | 0.002144556 | 0.002192167 | 0.000608417 |
| 0.000135989 | 0.000620599 | 0.006947339 | 0.000382347 | 0.002840384 | 0.011146453 | 0.005233473 | 0.001932936 | 0.001315421 | 0.000915954 | 0.001839868 |
| 0.000149065 | 6.12E-05    | 0           | 0.003164422 | 0.000487919 | 0.000321959 | 0.000537492 | 0.00019248  | 0.000941086 | 7.77E-05    | 0           |
| 0           | 0           | 0           | 0.000166019 | 0           | 0           | 0           | 0.00052051  | 0.000444305 | 0.000273138 | 0           |
| 0           | 0           | 0.000101185 | 0.000213812 | 0           | 0           | 6.90E-05    | 0.00052051  | 0.000241394 | 6.83E-05    | 0           |
| 0.000130759 | 0           | 0           | 0.000206266 | 0           | 0           | 7.25E-05    | 8.68E-05    | 0           | 0           | 0           |
| 8.89E-05    | 0           | 0.000368312 | 8.30E-05    | 0           | 0           | 0.000357149 | 0.000238567 | 9.80E-05    | 0           | 0           |
| 0           | 0           | 8.30E-05    | 0           | 0           | 0           | 7.07E-05    | 0           | 0           | 0           | 0           |
| 0           | 0           | 0           | 0           | 0.000163801 | 0           | 7.96E-05    | 0.000523221 | 0           | 0           | 0           |
| 0.000891774 | 0           | 0.001171718 | 0.001999774 | 0.006395221 | 0           | 0.001532913 | 0.006753075 | 0.010299468 | 0.001356271 | 0           |
| 0.000706096 | 0           | 0.000684008 | 8.30E-05    | 0.019415682 | 9.71E-05    | 0.000746124 | 0.00449211  | 0.011705849 | 0.003183469 | 0           |
| 0.000630256 | 0           | 0.000477592 | 0           | 0.003425887 | 0           | 0.000779717 | 0.003651703 | 0.007101875 | 0.001605862 | 0           |
| 0           | 0           | 5.87E-05    | 0           | 0.007472128 | 0           | 0           | 0.00013826  | 0.002623846 | 6.36E-05    | 0           |
| 0.000138604 | 0           | 8.09E-05    | 9.31E-05    | 0.000156831 | 0           | 6.54E-05    | 0.000384961 | 0.000377834 | 0.00039087  | 0           |
| 0           | 0           | 0           | 0           | 0           | 0           | 0           | 0           | 0           | 0           | 0           |
| 0           | 0           | 0.000184156 | 0           | 0.00013592  | 0           | 0           | 0.000463579 | 0.000349846 | 0           | 0           |
| 0.000279823 | 0           | 0.000269151 | 9.81E-05    | 0           | 0           | 0.000152054 | 0.000748233 | 0.000577246 | 0.000113023 | 0           |
| 0           | 0           | 0.000273199 | 7.80E-05    | 0.000174257 | 0           | 0           | 0.000452735 | 0.000482788 | 0           | 0           |
| 7.58E-05    | 0           | 0           | 9.56E-05    | 0.000965382 | 0           | 0           | 8.95E-05    | 0.000843129 | 0           | 0           |
| 0.000198753 | 0           | 0.000165943 | 0.000467872 | 0.000494889 | 0           | 7.07E-05    | 0.000314475 | 0.000342849 | 0.000134214 | 0           |
| 0           | 0           | 0.00048771  | 9.56E-05    | 0.000268355 | 0           | 6.01E-05    | 0.000474423 | 0.00059124  | 0           | 0           |
| 7.85E-05    | 0           | 0.000675914 | 9.06E-05    | 0           | 0           | 7.43E-05    | 0.000309053 | 0.000668206 | 0           | 0           |
| 0.000507343 | 8.63E-05    | 0.000463426 | 0           | 0           | 0.00162645  | 0           | 0           | 0.000157431 | 0.000155406 | 0.000950081 |
| 0           | 0           | 0           | 0           | 0           | 0           | 0           | 0           | 0           | 0           | 0           |
| 0           | 0           | 0           | 0           | 0           | 0           | 0           | 0           | 0           | 0           | 0           |
| 0           | 0           | 0           | 0           | 0           | 0           | 0           | 0           | 0           | 0           | 0           |
| 7.32E-05    | 0           | 0.00014773  | 0           | 0.000167286 | 0           | 0           | 0           | 0.000125945 | 0           | 0           |
| 0.0031199   | 0.003539922 | 0.001837514 | 0.000327007 | 0.000934016 | 0.004787757 | 0.000369526 | 0.000276521 | 0.000724181 | 0.001017203 | 0.001399542 |
| 0.000528265 | 0.000445273 | 0.001859774 | 0.000301853 | 0.000303207 | 0.003644246 | 0.000496826 | 0.000271099 | 9.45E-05    | 0           | 0.001401369 |
| 0.009231558 | 0.013360977 | 0.014774986 | 0.002221132 | 0.000749304 | 0.013219759 | 0.025138351 | 0.006452155 | 0.00425063  | 0.009376163 | 0.01951502  |
| 0.093965752 | 0.064405978 | 0.192226589 | 0.026608308 | 0.067256119 | 0.106679545 | 0.107424106 | 0.154152287 | 0.058231878 | 0.040480911 | 0.199913397 |
| 0.010698669 | 0.006598391 | 0.016327158 | 0.002754405 | 0.009674732 | 0.034199848 | 0.010314892 | 0.015420108 | 0.006405682 | 0.005337961 | 0.024091851 |
| 0.000292899 | 0.000205939 | 0.001446941 | 0.000586097 | 0.00116055  | 0.026544988 | 7.25E-05    | 0.000347007 | 0.000101455 | 0.000847669 | 0.000482349 |
| 0           | 0           | 0.001392301 | 0.000460325 | 0           | 0.002173225 | 0.000387206 | 7.05E-05    | 0.000108452 | 0           | 0.000566394 |

| H097        | H098        | H099        | H100        | H101        | H102        | H103        | H104        | H105        | H106        | H107        |
|-------------|-------------|-------------|-------------|-------------|-------------|-------------|-------------|-------------|-------------|-------------|
| 0.002606801 | 0.023306959 | 0.001353693 | 0.055738921 | 0.010570226 | 0.000407951 | 0.008104432 | 0.006101495 | 0.014131584 | 0.006000691 | 0.056262039 |
| 0.011311656 | 0.005851814 | 0.006145834 | 0.004499185 | 0.004008619 | 0.00202645  | 0.008787313 | 0.004538954 | 0.001327503 | 0.021550456 | 0.00605273  |
| 0.005570486 | 0.014185496 | 0.004172793 | 0.007663502 | 0.000506088 | 0.002217123 | 0.002269896 | 0.000273556 | 0.00206079  | 0.004518644 | 0.001916666 |
| 0.015178411 | 0.034312161 | 0.027409008 | 0.032647479 | 0.002129579 | 0.00476238  | 0.007610026 | 0.002467954 | 0.004583046 | 0.01262832  | 0.013345314 |
| 0.037612418 | 0.010751727 | 0.008818722 | 0.012806149 | 4.26E-05    | 0.000365825 | 0.001638914 | 0.000133805 | 0.000635305 | 0.00282975  | 0.004006872 |
| 0.014557744 | 0.006125348 | 0.005125636 | 0.012266146 | 0.002164654 | 0.001199463 | 0.042423299 | 0.005523162 | 0.007678972 | 0.016289722 | 0.006411381 |
| 0.001945791 | 0.000561657 | 0.001094126 | 0.005011431 | 0.000766648 | 0.000445642 | 0.00245564  | 0.001286012 | 0.000603698 | 0.001558815 | 0.000451207 |
| 0.001837174 | 0.003318885 | 0.003008025 | 0.002758053 | 0.002097009 | 0.001372399 | 0.006817884 | 0.001935708 | 0.002130326 | 0.003333006 | 0.000703806 |
| 0.04069403  | 0.015631582 | 0.009871777 | 0.043798291 | 0.023811194 | 0.009416121 | 0.033679691 | 0.019049332 | 0.007272819 | 0.017739782 | 0.017045597 |
| 0.012425753 | 0.008147679 | 0.001248552 | 0.005823959 | 0.011614972 | 0.00141009  | 0.00559143  | 0.001674046 | 0.004581465 | 0.006167021 | 0.016488337 |
| 0.001430637 | 0.002970584 | 0.004619643 | 0.008256496 | 0.001936664 | 0.003576219 | 0.001677156 | 0.001458471 | 0.002054469 | 0.002597314 | 0.000530265 |
| 0.169954133 | 0.050992292 | 0.034295759 | 0.050661882 | 0.053254497 | 0.280721008 | 0.207041322 | 0.074771566 | 0.083831805 | 0.149978889 | 0.06588586  |
| 0.000422054 | 0           | 0.000517492 | 0.000297759 | 0.000736584 | 0.001272629 | 0.001832853 | 0.000732953 | 0.001371753 | 0.00220068  | 0.000574614 |
| 0.004952922 | 0.000249828 | 0.001301123 | 7.07E-05    | 5.76E-05    | 0.001946634 | 0.000368756 | 0.004919554 | 0.002098719 | 0.003695521 | 5.01E-05    |
| 0.007004227 | 0.002111686 | 0.002322964 | 0.006999854 | 0.002620634 | 0.001270411 | 0.002889952 | 0.001412383 | 0.004967073 | 0.005149847 | 0.000746227 |
| 0.025084256 | 0.000288123 | 0.01984541  | 0.017302811 | 0.000944531 | 0.02877382  | 0.000934181 | 0.005966204 | 0.020746973 | 0.043171282 | 0.001342052 |
| 0.107986743 | 0.072760163 | 0.080242482 | 0.144652707 | 0.026101117 | 0.083042336 | 0.06192638  | 0.141983164 | 0.101448084 | 0.090739659 | 0.079686238 |
| 0.037969302 | 0.135527201 | 0.274315144 | 0.088361166 | 0.000759132 | 0.000514372 | 0.003998951 | 0.002607705 | 0.000793341 | 0.008047835 | 0.002452715 |
| 0.000403434 | 0.001508087 | 0.002640031 | 0.000270002 | 0           | 0.000427905 | 0.001507801 | 0.000395467 | 0.000761734 | 0.001157916 | 0           |
| 0.000266887 | 0.001203552 | 0.003095095 | 0.002371976 | 0.001598437 | 0.003562916 | 0.015263756 | 0.000316671 | 0.000638466 | 0.006292835 | 0.000416499 |
| 0.059624372 | 0.017743268 | 0.02034483  | 0.116683573 | 0.005261312 | 0.014347002 | 0.080926861 | 0.019600905 | 0.006100192 | 0.022151804 | 0.004895789 |
| 0.00605771  | 0.001475262 | 0.002027255 | 0.01120885  | 0.000395851 | 0.001520946 | 0.006389035 | 0.001907461 | 0.000478849 | 0.002452308 | 0.000723088 |
| 0.00097755  | 0.000687483 | 0.002776386 | 0.001569542 | 0.000175377 | 0.004239139 | 0.007022748 | 0.000735926 | 0.000821787 | 0.002516281 | 0.005267938 |
| 0.00040964  | 0.000306359 | 0.00044685  | 0.00091094  | 0.000117753 | 0.001297017 | 0.000975154 | 0.000627395 | 0.000216509 | 0.001590801 | 0           |
| 0           | 0.001134256 | 0.004769141 | 0.000840285 | 0.001109886 | 0.000235015 | 0           | 0.005213924 | 0.009237207 | 0.000260158 | 0.01044332  |
| 0.00071687  | 0.011805747 | 0.074957492 | 0.007630698 | 0.007716591 | 0.002225991 | 0.001529653 | 0.059537155 | 0.06522148  | 0.005218085 | 0.064096458 |
| 0           | 0.0009829   | 0.006697826 | 0.000974024 | 0.00045097  | 0.000155199 | 6.83E-05    | 0.007215048 | 0.00381341  | 0.0005587   | 0.005077043 |
| 0           | 0.00020971  | 0.000381137 | 0.000252338 | 7.77E-05    | 0           | 0           | 0.001294932 | 0.003661695 | 0.000234569 | 0.004623907 |
| 0           | 0.001063137 | 0.004028224 | 0.001165801 | 0.000638874 | 0           | 0.000292273 | 0.006532644 | 0.022063414 | 0.000656792 | 0.020356376 |
| 9.31E-05    | 0.000694777 | 0.002600603 | 0.001150661 | 0.000719046 | 0           | 0.000193938 | 0.005163376 | 0.012393187 | 0.000808195 | 0.009330729 |
| 0.000133443 | 0.001843622 | 0.005804125 | 0.001733561 | 0.001270231 | 0.000228364 | 9.83E-05    | 0.009632453 | 0.026741281 | 0.001648377 | 0.024710331 |
| 0.000145857 | 0.000647365 | 0.001674046 | 0.000774677 | 0.000576239 | 6.21E-05    | 0           | 0.002717723 | 0.010106406 | 0.000328396 | 0.005981385 |
| 0           | 0.000519715 | 0.001524548 | 0.000514769 | 0.000110237 | 0           | 0           | 0.002900589 | 0.008454929 | 0.000565097 | 0.00820464  |
| 0           | 0.000269887 | 0.000877272 | 0.000431498 | 0.000215463 | 0           | 0           | 0.00160863  | 0.003794446 | 0.000377442 | 0.003858398 |
| 0.050724008 | 0.005483454 | 0.008437585 | 0.001476177 | 0.044668537 | 0.042757214 | 0.009309034 | 0.027444835 | 0.005728807 | 0.027290989 | 0.042565787 |
| 0.045153522 | 0.012898061 | 0.006374188 | 0.011516702 | 0.046028962 | 0.021102575 | 0.012133429 | 0.01039068  | 0.049817705 | 0.025167077 | 0.066146172 |
| 0.12922907  | 0.143439641 | 0.045940152 | 0.054898636 | 0.21286516  | 0.111964703 | 0.037304423 | 0.10048586  | 0.181401685 | 0.045327181 | 0.156302725 |
| 0.000887554 | 0.003346238 | 0.000961057 | 0.000772154 | 0.001706168 | 0.000676222 | 0.000188475 | 0.003814921 | 0.005423797 | 0.0012752   | 0.006623487 |
| 0.006157016 | 0.000931841 | 0.00761124  | 8.07E-05    | 0.000202936 | 0.003948696 | 7.92E-05    | 0.001511993 | 0.00293631  | 0.005665898 | 0.001897383 |
| 0.003345395 | 0           | 0.000213568 | 5.05E-05    | 0           | 0.016694935 | 0.000207596 | 0.000300317 | 0.001036717 | 5.97E-05    | 0.000431925 |
| 0.004546386 | 0.018662344 | 0.004938353 | 0.000310376 | 0.02375357  | 0.004598313 | 0.000964228 | 0.111020752 | 0.025296831 | 0.000125814 | 0.006714114 |
| 0.002473358 | 0.077614488 | 0.014215425 | 0.025160613 | 0.013942476 | 0.004088375 | 0.000169354 | 0.00036722  | 0.007245953 | 0.012361764 | 0.000287307 |
| 0.001135821 | 0           | 0.019334489 | 0.028128107 | 0.007922032 | 0.005230193 | 0.000516258 | 0.000978261 | 0.005422217 | 0.001560947 | 8.87E-05    |
| 0.00594599  | 0.001774327 | 0.008025234 | 0.000953837 | 0.012038383 | 0.001558637 | 0.002515734 | 0.000709165 | 0.007473525 | 0.001456458 | 0.004542922 |
| 0.025155632 | 0.001196257 | 0.012161885 | 0.000141309 | 0.001425565 | 0.012342723 | 0.00123738  | 0.00074782  | 0.002209344 | 0.005631778 | 0.000987256 |
| 0.002647145 | 0           | 4.27E-05    | 0.002793381 | 0.001092349 | 0.002613988 | 0.001010664 | 0.004353114 | 0           | 0.001880814 | 0.00219626  |
| 0.007159393 | 0.023270487 | 0.004529288 | 0.014814759 | 0.003402315 | 0.106135887 | 0.005916481 | 0.005038491 | 0.055012351 | 0.017255718 | 0.015429736 |
| 0.021391287 | 0.070345766 | 0.010011418 | 0.004224137 | 0.000666433 | 0.016149523 | 9.01E-05    | 0.009027359 | 0.000622662 | 0.01491643  | 0.002834505 |

|             |             |             |             |             |             |             |             |             |             |             |
|-------------|-------------|-------------|-------------|-------------|-------------|-------------|-------------|-------------|-------------|-------------|
| 0.016944208 | 0.022916716 | 0.008871292 | 0.002745436 | 8.52E-05    | 0.002975379 | 0.005659718 | 0.003287136 | 0.000450403 | 0.000927612 | 0           |
| 0.00080066  | 0.018049626 | 0.004319005 | 0.002450201 | 0.007556246 | 0.000782644 | 0.011393186 | 0.009641374 | 0.007604695 | 0.001987436 | 0.01898733  |
| 0.000155167 | 0           | 9.20E-05    | 6.31E-05    | 0.000102721 | 0.000625229 | 0           | 0           | 0.000346099 | 0.000110887 | 0.002579978 |
| 0.00710974  | 0.000443126 | 0.006375831 | 0.000565237 | 0.011366939 | 0.03841387  | 0.006446397 | 0.001824204 | 0.005006582 | 0.022100626 | 0.001295774 |
| 0           | 0.000213357 | 0.016702672 | 0.0012844   | 0.002102019 | 0.001523163 | 0.000893208 | 0           | 0.001300637 | 0.002951299 | 0.001745053 |
| 0.005688413 | 0           | 0.000813202 | 0           | 0.001746254 | 0.003713681 | 0.027648486 | 0.00227022  | 0.014572505 | 0.007403838 | 0.000403001 |
| 0.014917731 | 0.005326627 | 0.009876705 | 0.000302805 | 0.007405923 | 0.01585908  | 0.071350138 | 0.002215212 | 0.010955059 | 0.02842758  | 0.000528336 |
| 0.001160647 | 0.000244357 | 0.002403463 | 9.08E-05    | 0.004672546 | 0.01025641  | 0.013277938 | 0.003471489 | 0.002436916 | 0.002079131 | 0.002263748 |
| 0.000971344 | 3.10E-05    | 0           | 0           | 0.014521221 | 0.000259403 | 0.053671715 | 0.004693572 | 0.002903122 | 0.153450504 | 0.002448858 |
| 0           | 3.46E-05    | 0           | 0           | 0.004419502 | 0.000383562 | 0.004130064 | 0.001210189 | 0.001261128 | 0.00228811  | 0           |
| 0.015873558 | 0.00457532  | 0.026705876 | 0.00660873  | 0.024605402 | 0.017601738 | 0.091986801 | 0.011872939 | 0.017074215 | 0.042855681 | 0.016096905 |
| 0.000515154 | 0.000111237 | 0.000464921 | 0.00018673  | 0.00314426  | 0.000574235 | 0.007022748 | 0.000865271 | 8.38E-05    | 0.004273413 | 0.001440392 |
| 0           | 0.000114884 | 0.000354852 | 6.56E-05    | 0.001255199 | 0.000795947 | 0.004455116 | 0.000520352 | 0.000169099 | 0.000893493 | 0.002539485 |
| 0           | 0           | 0.002301608 | 0.000174113 | 0.000258055 | 9.09E-05    | 0.00670316  | 0.00064821  | 0.000640046 | 0.00538868  | 0.010181081 |
| 0.000114823 | 0.000206063 | 0.002235894 | 5.55E-05    | 0.000135291 | 0.000175153 | 0.010155806 | 0.001430224 | 0.000733287 | 0.0043054   | 0.004918927 |
| 0.000282403 | 0           | 0.00057992  | 0           | 0           | 0.000175153 | 0.000314125 | 0           | 9.17E-05    | 3.84E-05    | 0.000343226 |
| 0.00061446  | 0           | 0           | 0           | 0           | 0           | 7.10E-05    | 0           | 0           | 0           | 0           |
| 0.00052136  | 0           | 0           | 0           | 0           | 0           | 0           | 0           | 0           | 0           | 0           |
| 0           | 0           | 0           | 0           | 0           | 0           | 0.000111992 | 0           | 0           | 0           | 0           |
| 0           | 0           | 0           | 0           | 0           | 0           | 9.56E-05    | 0           | 0           | 0           | 0           |
| 0           | 0           | 0           | 0           | 0           | 0           | 0           | 0           | 0           | 0           | 0           |
| 0           | 0           | 0           | 0           | 0           | 0           | 0           | 0           | 0           | 0           | 0           |
| 0.004142952 | 0           | 0           | 0           | 0           | 0.000450076 | 0.001046174 | 0           | 0           | 0           | 0           |
| 0.001238231 | 0           | 0           | 0           | 0           | 0.000157416 | 0.003266903 | 0           | 0           | 0           | 0           |
| 0.001142027 | 0           | 0           | 0           | 0           | 0           | 0.001617062 | 0           | 0           | 4.05E-05    | 0           |
| 0.00014896  | 0           | 0           | 0           | 0           | 0           | 0           | 0           | 0           | 0           | 0           |
| 0.00038171  | 0           | 0           | 0           | 0           | 0           | 0.000551768 | 0           | 0           | 0           | 0           |
| 0           | 0           | 0           | 0           | 0           | 0           | 0           | 0           | 0           | 0           | 0           |
| 0.000397227 | 0           | 0           | 0           | 0           | 0.000119725 | 0.000191207 | 0           | 0           | 0           | 0           |
| 0.000136547 | 0           | 0           | 0           | 0           | 7.09E-05    | 0           | 0           | 0           | 0           | 0           |
| 0.00025137  | 0           | 0           | 0           | 0           | 7.98E-05    | 0.000185744 | 0           | 0           | 0           | 0           |
| 0.001173061 | 0           | 0           | 0           | 0           | 9.09E-05    | 0.000101066 | 0           | 0           | 0           | 0           |
| 0.000155167 | 0           | 0           | 0           | 0           | 0           | 0.000185744 | 0           | 0           | 0           | 0           |
| 0.000425157 | 0           | 0           | 0           | 0           | 0           | 0           | 0           | 0           | 0           | 0           |
| 0           | 0           | 0           | 0           | 0           | 0           | 0           | 0           | 0           | 0           | 0           |
| 0           | 0.000289947 | 0.003310306 | 0.000340656 | 0.000440948 | 0.000172936 | 0.000478017 | 0.001175995 | 0.001912236 | 0.000102357 | 0.002552983 |
| 0           | 0           | 0           | 0           | 0           | 0           | 0           | 0           | 0           | 0           | 0           |
| 0           | 0           | 0           | 0           | 0           | 0           | 0           | 0           | 0           | 0           | 0           |
| 0           | 0           | 0           | 0           | 0           | 0           | 0           | 0           | 0           | 0           | 0           |
| 0.001803038 | 0           | 0           | 0           | 0           | 0           | 0           | 0           | 0           | 0           | 0           |
| 0.004760516 | 0.000988371 | 0.010891976 | 0.000244768 | 0.002390139 | 0.002163912 | 0.000958765 | 0.018641971 | 0.005790441 | 0.003219987 | 0.006717971 |
| 0.002277848 | 0.000377478 | 0.019214562 | 0.001526644 | 0.000160345 | 8.43E-05    | 0           | 0.011856585 | 0.003045355 | 0.000906288 | 0.008187286 |
| 0.001827864 | 0.000902664 | 0.010637337 | 0.010767259 | 0.060615323 | 0.01135832  | 0.011169202 | 0.107660766 | 0.03848652  | 0.014374789 | 0.040494862 |
| 0.036774518 | 0.139801633 | 0.089754479 | 0.160845231 | 0.29092549  | 0.08191382  | 0.055815961 | 0.113412883 | 0.087441349 | 0.086095201 | 0.102154031 |
| 0.003100232 | 0.017221729 | 0.019628556 | 0.017918515 | 0.027732124 | 0.006227898 | 0.010882392 | 0.023977806 | 0.009927825 | 0.010274104 | 0.023310432 |
| 0.000729284 | 0           | 0.000946271 | 0.00034318  | 8.77E-05    | 0           | 0.005752589 | 0.000896492 | 0.000842332 | 0.000513918 | 0.000460848 |
| 0.00013965  | 0           | 0.000369637 | 0           | 0           | 0           | 0.00645186  | 0           | 0.000474108 | 0           | 0.001363262 |

| H108        | H109        | H110        | H111        | H112        | H113        | H114        | H115        | H116        | H117        | H118        |
|-------------|-------------|-------------|-------------|-------------|-------------|-------------|-------------|-------------|-------------|-------------|
| 0.010799037 | 0.002680929 | 0.022963251 | 0.002478849 | 0.001564437 | 0.006801432 | 0.016792251 | 0.063744501 | 0.001439915 | 0.002726025 | 0.001757891 |
| 0.004165642 | 0.007973298 | 0.002176848 | 0.010428725 | 0.010717041 | 0.005504434 | 0.006204034 | 0.018265206 | 0.021194879 | 0.004277526 | 0.009790155 |
| 0.001490179 | 0.001522032 | 0.00152028  | 0.001781022 | 0.006940291 | 0.002754299 | 0.027804098 | 0.006921271 | 0.01101521  | 0.007193322 | 0.001100237 |
| 0.01215773  | 0.000820418 | 0.006593427 | 0.001304893 | 0.026283401 | 0.008793771 | 0.027904365 | 0.012830405 | 0.003088715 | 0.01071946  | 0.007959389 |
| 0.001669306 | 0           | 0           | 0.000270799 | 0.023018019 | 0.000995128 | 0.004672452 | 0.016698567 | 0.031956641 | 0.02386234  | 0.00091716  |
| 0.006884934 | 0.010205911 | 0.00253195  | 0.002276494 | 0.012901185 | 0.007001291 | 0.007700522 | 0.015192055 | 0.022793546 | 0.022226211 | 0.003284714 |
| 0.000512606 | 0.001058026 | 0.000136862 | 0.000111593 | 0.000927395 | 0.00076196  | 0.000741977 | 0.001372897 | 0.003278104 | 0.001800254 | 0.000300388 |
| 0.003077545 | 0.002501603 | 0.001636797 | 0.002734769 | 0.002641341 | 0.001005538 | 0.013764182 | 0.004496154 | 0.032800537 | 0.026021618 | 0.000849618 |
| 0.022282185 | 0.019459152 | 0.023360891 | 0.010242737 | 0.039509608 | 0.010419703 | 0.06058145  | 0.034733287 | 0.034449337 | 0.087871366 | 0.009932351 |
| 0.00341293  | 0.001748432 | 0.001936415 | 0.005395143 | 0.008084367 | 0.003418412 | 0.013370633 | 0.004172137 | 0.011976081 | 0.006429112 | 0.001075353 |
| 0.003717826 | 0.001761881 | 0.000813775 | 0.002135143 | 0.001133241 | 0.003984678 | 0.004241303 | 0.004526217 | 0.005442154 | 0.00464168  | 0.002746149 |
| 0.061366049 | 0.144637918 | 0.165303594 | 0.067799359 | 0.087324597 | 0.06243286  | 0.190374849 | 0.22369533  | 0.254708967 | 0.499226814 | 0.15055474  |
| 0.000228672 | 0.000641092 | 0.001383417 | 0.00044042  | 0.000572038 | 0.000120748 | 0           | 0           | 0.001328509 | 0.001138622 | 0.000815846 |
| 0.008007333 | 0.006668699 | 0.00260223  | 0.008356073 | 0.001230748 | 0.015168422 | 0.000157921 | 0           | 0.002760069 | 0.000710357 | 0.000287946 |
| 0.00436573  | 0.002586783 | 0.001614604 | 0.002203587 | 0.002470163 | 0.001386518 | 0.002253506 | 0.000414207 | 0.011847965 | 0.007790842 | 0.00240488  |
| 0.033391835 | 0.026547026 | 0.012001332 | 0.001977426 | 0.02692261  | 0.002816755 | 0.004183649 | 0.0001737   | 0.043528878 | 0.038084858 | 0.008032264 |
| 0.146367259 | 0.168140879 | 0.036891749 | 0.316255658 | 0.256093069 | 0.188676771 | 0.031724546 | 0.038414388 | 0.104138989 | 0.056572081 | 0.16399043  |
| 0.00569584  | 0.002030871 | 0.005960902 | 0.001538494 | 0.122786604 | 0.022490319 | 0.081279109 | 0           | 0.079874892 | 0.000733437 | 0.013025101 |
| 0.000710789 | 0.00039676  | 0.000318112 | 0.000291629 | 0.001397592 | 0.000703668 | 9.27E-05    | 0           | 0.001478907 | 0.000330816 | 0.000136863 |
| 0.000423043 | 0.001432369 | 0.002302613 | 0.001617353 | 0.000697713 | 0.003591206 | 0.00314087  | 0.019531211 | 0.013661088 | 0.000948852 | 0.004768879 |
| 0.024142051 | 0.010719233 | 0.0077771   | 0.013072732 | 0.02237231  | 0.017298164 | 0.012350414 | 0.027337683 | 0.075140162 | 0.020718306 | 0.010606001 |
| 0.002761215 | 0.000905598 | 0.000821173 | 0.001459635 | 0.001722614 | 0.001911146 | 0.000869818 | 0.002064356 | 0.006742812 | 0.001548936 | 0.001011365 |
| 0.001535914 | 0.000629884 | 0.001327933 | 0.000678485 | 0.001003233 | 0.001421909 | 0.001892544 | 0.002678986 | 0.006887639 | 0.0008155   | 0.00133486  |
| 0.00057168  | 0.000237607 | 0.000741645 | 0.000743952 | 0.000327188 | 0.000988883 | 0.001150566 | 0.002271459 | 0.00174628  | 0           | 0.000394592 |
| 0.00041161  | 0.000118804 | 0.001174425 | 0.000437444 | 0.000140843 | 0.003224799 | 0.000165441 | 0           | 0           | 0           | 0.000838953 |
| 0.006480947 | 0.001764123 | 0.007279587 | 0.001336139 | 0.003230713 | 0.009495357 | 0.001932651 | 0           | 0.000777053 | 0.000656503 | 0.003629538 |
| 0.000499267 | 0.000239849 | 0.000813775 | 0.000165157 | 6.28E-05    | 0.000433027 | 0.000140374 | 0           | 9.47E-05    | 6.92E-05    | 0.000271949 |
| 0.000179126 | 8.74E-05    | 0.000236735 | 0.000132424 | 6.07E-05    | 0.000637049 | 8.77E-05    | 0.000133615 | 0           | 0           | 0.001166002 |
| 0.000811786 | 0.000125528 | 0.001751466 | 0.000438932 | 0.000723714 | 0.004174127 | 0.000135361 | 0.000825074 | 0.000328646 | 0.000225673 | 0.00629037  |
| 0.00061932  | 0.000154669 | 0.001078252 | 0.000349658 | 0.000437696 | 0.001919474 | 8.77E-05    | 0.000133615 | 0.000181034 | 7.44E-05    | 0.005021276 |
| 0.000640282 | 6.28E-05    | 0.002737243 | 0.000821323 | 0.001076904 | 0.006491235 | 4.01E-05    | 0.000283932 | 0.000286869 | 0.000220544 | 0.010403373 |
| 0.000402082 | 5.60E-05    | 0.000826721 | 0.000214258 | 0.000383525 | 0.002142233 | 0           | 0           | 0.000100265 | 0.000105143 | 0.003761069 |
| 0.000102902 | 0           | 0.000704655 | 0.000266335 | 0.000212347 | 0.001909064 | 0.000150401 | 0           | 4.73E-05    | 0.00014361  | 0.002822579 |
| 0.000127675 | 0           | 0.000247831 | 8.18E-05    | 0           | 0.000859808 | 0.000107787 | 0           | 0           | 0           | 0.001366854 |
| 0.035120215 | 0.053741869 | 0.052481089 | 0.078954181 | 0.016786275 | 0.065532748 | 0.026312623 | 0.023917132 | 0.016042379 | 0.0036877   | 0.068292908 |
| 0.053951358 | 0.048579511 | 0.043768148 | 0.112839726 | 0.021951949 | 0.04096057  | 0.133611074 | 0.008745119 | 0.007224641 | 0.010160407 | 0.140323779 |
| 0.158854658 | 0.092119951 | 0.106476909 | 0.09185134  | 0.047307956 | 0.047426823 | 0.137361067 | 0.239167978 | 0.034583023 | 0.023777712 | 0.081604178 |
| 0.002543976 | 0.001353914 | 0.006360391 | 0.002392551 | 0.000985898 | 0.003988841 | 0.002639534 | 0.003995096 | 0.000788193 | 0.001754094 | 0.002044059 |
| 0.001114776 | 0.008300569 | 0.005907267 | 0.001769119 | 0.005306517 | 0.032701836 | 0.012287747 | 0.000694799 | 0.000339786 | 0.000433394 | 0.00745815  |
| 0.000329669 | 0.000412451 | 0.000810076 | 0           | 0.002587171 | 0           | 3.26E-05    | 0           | 0.000983153 | 0.000977061 | 0.000248842 |
| 0.009169749 | 0.011600174 | 0.008735135 | 0.031695349 | 0.005514531 | 0.001790398 | 0.036467185 | 0.005027274 | 6.68E-05    | 0.000376976 | 0.00141129  |
| 0.006496192 | 0.001288908 | 0.012299099 | 0.012209747 | 0.015590196 | 0.003301828 | 8.27E-05    | 0.00210444  | 0.000167108 | 0.000487248 | 0.008784122 |
| 0.000314424 | 0.000455041 | 0.011278182 | 0.005221058 | 0.002970696 | 0.004072116 | 0           | 0.003600931 | 0.000111405 | 0.000518022 | 0.001613918 |
| 0.002349605 | 0.00309338  | 0.003920916 | 0.005310332 | 0.001911126 | 0.009836782 | 0.004231276 | 0.000300634 | 0.000359282 | 0.001679724 | 0.010623776 |
| 0.018541492 | 0.001786539 | 0.014305794 | 0.002609785 | 0.020766704 | 0.022119749 | 0.00130598  | 0.000146977 | 0.00133408  | 0.006865071 | 0.000808736 |
| 0.004369542 | 0.00736583  | 0.002757588 | 0.006153974 | 0.006030231 | 0.018351584 | 0           | 0.007495816 | 0           | 0           | 0.005163471 |
| 0.040568326 | 0.056546085 | 0.036727145 | 0.006964882 | 0.011852449 | 0.031084232 | 0.004652399 | 0           | 0.005319608 | 0.001238636 | 0.001299311 |
| 0.014206251 | 0.029573158 | 0.008759178 | 0.015146871 | 0.030653856 | 0.034123746 | 0.000155414 | 0.000450952 | 0.002556754 | 0           | 0.044939087 |

|             |             |             |             |             |             |             |             |             |             |             |
|-------------|-------------|-------------|-------------|-------------|-------------|-------------|-------------|-------------|-------------|-------------|
| 0.008135008 | 0.005411173 | 0.003956056 | 0.00149832  | 0.013438554 | 0.006913853 | 0.000330882 | 0.000334038 | 0.002938318 | 0.003277385 | 0.005623829 |
| 0.001469218 | 0.004731974 | 0.02951044  | 0.001572715 | 0.001908959 | 0.008976975 | 0.002163265 | 0.001286047 | 0.004500778 | 0.000733437 | 0.003320263 |
| 5.15E-05    | 0.000100871 | 0.000626977 | 0           | 0.0005092   | 0.001134613 | 0.000253175 | 0           | 0.000144827 | 0.000387234 | 0.000348379 |
| 0.005632955 | 0.004615412 | 0.007314727 | 0.001217106 | 0.014998657 | 0.003786901 | 0.000945018 | 0.000557844 | 0.016022883 | 0.027757761 | 0.001176667 |
| 0.001179567 | 0.000508839 | 0.000567793 | 0.000175573 | 0.000153843 | 0.000485073 | 0.000799631 | 0.000163679 | 0.001618164 | 0.002213133 | 0.000332382 |
| 0.001223395 | 0.00455489  | 0.003149679 | 0.001717042 | 0.001547102 | 0.003757755 | 0.000486296 | 0           | 0.000375993 | 0.000184641 | 0.002945223 |
| 0.009583264 | 0.013353089 | 0.002833417 | 0.005706115 | 0.011993292 | 0.003609943 | 0.001403741 | 0.000467653 | 0.032427329 | 0.001620741 | 0.016859045 |
| 0.002446791 | 0.007433078 | 0.007002164 | 0.003246608 | 0.002201479 | 0.003955531 | 0.000260695 | 0.000313996 | 0.000997078 | 0.000582133 | 0.002408435 |
| 0           | 0           | 0.005535519 | 0.005113929 | 0.007638004 | 0.000587084 | 0           | 0           | 0.000384349 | 0.001705369 | 0           |
| 0.000163882 | 4.26E-05    | 0.000344005 | 0.000691876 | 0.00020368  | 0           | 0.000170454 | 0           | 0.000133686 | 0.000197464 | 0.000101314 |
| 0.0096976   | 0.016477851 | 0.018955409 | 0.010956931 | 0.012350815 | 0.014666694 | 0.018925436 | 0.014243387 | 0.019704831 | 0.036600033 | 0.016921256 |
| 0.000436382 | 0.000571603 | 0.000482717 | 0.000168133 | 0.000255684 | 0.000401799 | 0.000431149 | 0.000187061 | 0           | 0.000225673 | 0.000808736 |
| 0.001011874 | 0.002528502 | 0.011529712 | 0.000241041 | 0.004125606 | 0.006072782 | 0.001403741 | 0.000297294 | 0.000356497 | 0.000474426 | 0.002264462 |
| 0.000504984 | 0.000576086 | 0.001805101 | 0.001484929 | 0.000554703 | 0.001040929 | 0.000263201 | 0.000638013 | 0.00175185  | 0.000451346 | 0.000296833 |
| 0.001471123 | 0.000977329 | 0.005361667 | 0.000572843 | 0.000223181 | 0.003649498 | 0.008718234 | 0.000454292 | 0.003155558 | 0.000158997 | 0.000351934 |
| 0           | 0           | 0.00061403  | 0           | 0.000121341 | 0.000345589 | 0.000147894 | 0.000678097 | 0.016847283 | 0.001523292 | 0           |
| 0           | 0           | 0           | 0           | 0           | 0           | 0           | 0.000484355 | 0.001503973 | 0.001738707 | 0           |
| 0           | 0           | 0           | 0           | 0           | 0           | 0           | 0.000444271 | 5.57E-05    | 5.90E-05    | 0           |
| 0           | 0.000132253 | 0           | 0           | 0           | 0           | 0           | 0           | 5.29E-05    | 7.44E-05    | 7.82E-05    |
| 0           | 0.000208467 | 0           | 0           | 0           | 0           | 0           | 0.000273911 | 0           | 0           | 5.87E-05    |
| 5.15E-05    | 0.000156911 | 0           | 0           | 0           | 0           | 0           | 9.69E-05    | 0           | 0           | 0           |
| 0           | 0.000116562 | 0           | 0           | 0           | 0           | 0           | 0           | 0           | 0           | 0           |
| 0           | 0.004431603 | 0           | 0           | 9.10E-05    | 0           | 0.000726937 | 0.000724863 | 0.00308036  | 0.002302889 | 0           |
| 0           | 8.97E-05    | 0           | 0           | 0           | 0           | 0.003514366 | 0.005905795 | 0.001930099 | 0.004421136 | 0           |
| 0           | 0           | 0           | 0           | 0           | 0           | 0.000684324 | 0.001870614 | 0.00175742  | 0.002620882 | 0           |
| 0           | 6.05E-05    | 0           | 0           | 0           | 0           | 0.000616643 | 0.001777083 | 0.001902247 | 0.000828322 | 0           |
| 0           | 0.000190534 | 0           | 0           | 0           | 0           | 0.000152907 | 0.00105222  | 0.000604374 | 0.001105284 | 0           |
| 0           | 0           | 0           | 0           | 0           | 0           | 0           | 0           | 0           | 0           | 0           |
| 0           | 0.000114321 | 0           | 0           | 0           | 0           | 0           | 0.00044093  | 0           | 0           | 0           |
| 0           | 0.000446074 | 0           | 0           | 0           | 0           | 4.51E-05    | 0.000317336 | 4.46E-05    | 0           | 0           |
| 0           | 0.000748688 | 0           | 0           | 0           | 0           | 0           | 0.000130275 | 0           | 0           | 0           |
| 0           | 4.93E-05    | 0           | 0           | 0           | 0           | 0.000403576 | 0.000567865 | 0           | 8.98E-05    | 0           |
| 0           | 0.000177085 | 0           | 0           | 0           | 0           | 0.000200534 | 0.000330698 | 0.000582093 | 0.00141302  | 0           |
| 0           | 0.000195017 | 0           | 0           | 0           | 0           | 8.52E-05    | 0           | 8.36E-05    | 8.21E-05    | 0           |
| 0           | 0.000179326 | 0           | 0           | 0           | 0           | 0.000142881 | 0           | 6.41E-05    | 8.46E-05    | 0           |
| 0.00044591  | 8.97E-05    | 0.000329209 | 0.000177061 | 0.000177678 | 0.000181122 | 0.000112801 | 0.000170359 | 4.46E-05    | 6.67E-05    | 0           |
| 0           | 0           | 0           | 0           | 0           | 0           | 0           | 0           | 0           | 0           | 0           |
| 0           | 0           | 0           | 0           | 0           | 0           | 0           | 0           | 0           | 0           | 0           |
| 0           | 0           | 0           | 0           | 0           | 0           | 0           | 0           | 0           | 0           | 0           |
| 0           | 0           | 0           | 0           | 0           | 0           | 0.000376002 | 0           | 3.34E-05    | 0           | 0           |
| 0.001537819 | 0.001123031 | 0.010658603 | 0.002114313 | 0.000686879 | 0.003757755 | 0.004883013 | 0.000133615 | 0.000169893 | 0.001023221 | 0.007870517 |
| 0.00179317  | 0.000161394 | 0.005561412 | 8.03E-05    | 0.000292519 | 0.000691177 | 0.005206375 | 0           | 0           | 7.95E-05    | 0.004879081 |
| 0.020317511 | 0.029176399 | 0.049227839 | 0.019564461 | 0.002959862 | 0.044058375 | 0.005900725 | 0.01803472  | 0.008684051 | 0.00277475  | 0.017337177 |
| 0.20071117  | 0.146688963 | 0.159331595 | 0.101674488 | 0.062939321 | 0.152589832 | 0.045556408 | 0.127007987 | 0.021551376 | 0.018197438 | 0.096891963 |
| 0.014036652 | 0.014657688 | 0.033007823 | 0.008911062 | 0.004987996 | 0.018999042 | 0.011442996 | 0.020466518 | 0.001111269 | 0.004226237 | 0.011665357 |
| 0           | 0.004252276 | 0.007532967 | 0.000117544 | 0.00045503  | 0.002970812 | 0.007547614 | 0.003407189 | 0.000281299 | 0.000800113 | 0.000133308 |
| 0.000156259 | 0.000537979 | 0.000606632 | 4.02E-05    | 0           | 0.000341425 | 0.000463736 | 0.000183721 | 0.000130901 | 7.95E-05    | 6.22E-05    |

| H119        | H120        | H121        | H122        | H123        | H124        | H125        | H126        | H127        | H129        | H130        |
|-------------|-------------|-------------|-------------|-------------|-------------|-------------|-------------|-------------|-------------|-------------|
| 0.000925679 | 0.013524124 | 0.005519125 | 0.001157588 | 0.002923324 | 0.007109653 | 0.002457348 | 0.00769518  | 0.023021119 | 0.062377716 | 0.167001798 |
| 0.00304838  | 0.00380165  | 0.004584807 | 0.002374616 | 0.00531994  | 0.005354542 | 0.010279732 | 0.015408035 | 0.012332018 | 0.014306668 | 0.016909837 |
| 0.001124947 | 0.003794172 | 0.000662411 | 0.001087746 | 0.001362782 | 0.002738361 | 0.006536441 | 0.010050351 | 0.003033424 | 0.018222432 | 0.022561319 |
| 0.002408178 | 0.005035467 | 0.002736421 | 0.003052228 | 0.011650219 | 0.011628335 | 0.005430114 | 0.007005861 | 0.026216806 | 0.01191684  | 0.008804919 |
| 0.000484745 | 0.000103192 | 0.000578525 | 0.00039676  | 0.002065711 | 0.001898622 | 0.011021622 | 0.002447964 | 0.017488388 | 0.006760412 | 0.020516217 |
| 0.001726991 | 0.009188568 | 0.001272754 | 0.004419341 | 0.002850877 | 0.006087616 | 0.001882058 | 0.019760462 | 0.00869236  | 0.025714862 | 0.013049535 |
| 0.000234599 | 0.000574285 | 0.000494639 | 0.000453228 | 0.000789082 | 0.000482898 | 0           | 0.006016071 | 0.001455863 | 0.002419431 | 0.004289224 |
| 0.000792833 | 0.000625134 | 0.000905391 | 0.001838172 | 0.001674107 | 0.001848199 | 0.007762512 | 0.00659934  | 0.00464479  | 0.006803472 | 0.001839219 |
| 0.004128103 | 0.009668634 | 0.019690084 | 0.007609767 | 0.01563479  | 0.021245566 | 0.01755546  | 0.02024652  | 0.034275888 | 0.057813362 | 0.049552548 |
| 0.000460719 | 0.00473636  | 0.002273602 | 0.000948063 | 0.003982613 | 0.002009165 | 0.002733279 | 0.002218191 | 0.006988594 | 0.014594631 | 0.012184828 |
| 0.001825919 | 0.000650558 | 0.004662908 | 0.001585554 | 0.000532581 | 0.002643332 | 0.001330196 | 0.010569549 | 0.006510819 | 0.005842697 | 0.001135787 |
| 0.06974105  | 0.031081706 | 0.197025227 | 0.069932283 | 0.100697055 | 0.056679408 | 0.009917898 | 0.127941479 | 0.188360757 | 0.1476095   | 0.016769151 |
| 0.000422562 | 8.97E-05    | 0.001249613 | 0.000720706 | 0.000281955 | 0.000455747 | 0           | 0.001891207 | 0.001115561 | 0.000694342 | 0.000260785 |
| 0.001975723 | 7.78E-05    | 0.00071737  | 0.000805408 | 0.005915179 | 0.00220504  | 0           | 0.009931046 | 0.001557278 | 0.005382493 | 0.000645099 |
| 0.001505111 | 0.000486049 | 0.00230542  | 0.001295785 | 0.00232417  | 0.003166957 | 0.000377453 | 0.003073211 | 0.006278692 | 0.003024961 | 0.000356863 |
| 0.007706451 | 0.001465624 | 0.00428976  | 0.014629594 | 0.024244204 | 0.02337885  | 0.005135961 | 0.009365451 | 0.006988594 | 0.020391576 | 0.008403448 |
| 0.057854206 | 0.098084668 | 0.09581437  | 0.032696288 | 0.117490993 | 0.160987284 | 0.035602909 | 0.114172785 | 0.104562982 | 0.085011101 | 0.015544148 |
| 0.009138073 | 0.018843742 | 0.000185128 | 0.006357075 | 0.019082863 | 0.034380776 | 0.00040869  | 0.019521852 | 0.012990086 | 0.020292    | 0.122270338 |
| 0.000175243 | 8.82E-05    | 0.00024298  | 0.000221413 | 0.000767544 | 0.000116361 | 0.000192631 | 0.001144445 | 0.000128459 | 0.001719707 | 0.000219608 |
| 0.002310663 | 0.001257745 | 0.000144631 | 0.003327137 | 0.001366698 | 0.005432116 | 0.005830995 | 0.007069933 | 0.004142224 | 0.004583193 | 0.00159216  |
| 0.006242324 | 0.001311584 | 0.01499825  | 0.004790839 | 0.011188127 | 0.012879215 | 0.048139548 | 0.012803206 | 0.02605905  | 0.038872368 | 0.074368283 |
| 0.000412669 | 3.14E-05    | 0.001214902 | 0.000485919 | 0.001118029 | 0.000826163 | 0.00362615  | 0.001550966 | 0.003152868 | 0.003867322 | 0.00455344  |
| 0.002193364 | 0.000206384 | 0.001272754 | 0.001154616 | 0.000248669 | 0.001644568 | 0.0037511   | 0.00140294  | 0.00429998  | 0.002949606 | 0.000545589 |
| 0.000706625 | 0.000293125 | 0.000954566 | 0.001147186 | 0.000387688 | 0.000308356 | 0.000570084 | 0.000397684 | 0.002684107 | 0.001286416 | 0           |
| 0.000607697 | 0.001247276 | 0.001379781 | 0.001396833 | 0.001155232 | 0.001266395 | 0           | 0.000320356 | 0.000585951 | 0.000188387 | 0           |
| 0.006727069 | 0.007609282 | 0.005741857 | 0.012217829 | 0.012852444 | 0.005649323 | 0.015462549 | 0.004884882 | 0.001827717 | 0.003434031 | 0.001708827 |
| 0.00079566  | 0.000323036 | 0.000428108 | 0.000695444 | 0.000843907 | 0.000352961 | 0.000356628 | 0.000437452 | 0.000412419 | 8.07E-05    | 0.000288236 |
| 0.000363205 | 0.000297611 | 0.000511994 | 0.000123337 | 0.000440555 | 0.000129936 | 0.033817167 | 0           | 9.24E-05    | 0           | 0           |
| 0.003041314 | 0.001508995 | 0.006346415 | 0.000570621 | 0.001578164 | 0.00169693  | 0.165428448 | 0.000554548 | 0.000169024 | 0.000231447 | 0           |
| 0.002993263 | 0.000804598 | 0.004674479 | 0.000497807 | 0.001212014 | 0.001353665 | 0.120519375 | 0.000304891 | 0.000171278 | 8.61E-05    | 0.000171569 |
| 0.002056278 | 0.002412298 | 0.008047277 | 0.001105578 | 0.00336192  | 0.002199222 | 0.23143583  | 0.000731296 | 0.000105922 | 0.00017224  | 0.000130392 |
| 0.001139079 | 0.000583259 | 0.002071118 | 0.000173861 | 0.001266839 | 0.000607016 | 0.080634329 | 0.000165702 | 0.000105922 | 0           | 0.000130392 |
| 0.00152631  | 0.000771696 | 0.002455837 | 0.000274909 | 0.000783208 | 0.000581805 | 0.091528397 | 5.08E-05    | 0.0001848   | 0.000244903 | 0           |
| 0.000650095 | 0.000465111 | 0.001669043 | 9.21E-05    | 0.000419016 | 0.00035684  | 0.042613119 | 0.000152445 | 0.000105922 | 0           | 0           |
| 0.032663029 | 0.007479171 | 0.069952301 | 0.006832593 | 0.016118421 | 0.021941792 | 0.000799159 | 0.028102982 | 0.03595261  | 0.014266299 | 0.005215697 |
| 0.015908953 | 0.019500282 | 0.064248048 | 0.005276759 | 0.024577068 | 0.033405283 | 0.001160993 | 0.014780578 | 0.075722917 | 0.022646841 | 0.010561785 |
| 0.093695634 | 0.195614493 | 0.191644948 | 0.402394825 | 0.131565241 | 0.100227486 | 0.009207245 | 0.053729279 | 0.092172369 | 0.041377918 | 0.030587315 |
| 0.002413831 | 0.000538393 | 0.003251308 | 0.001304701 | 0.002606125 | 0.0020848   | 0           | 0.002823554 | 0.002319014 | 0.001025365 | 0.001080884 |
| 0.000585085 | 0.000611674 | 0.002108722 | 0.003405894 | 0.001078869 | 0.002141041 | 0           | 0.002547385 | 0.001388253 | 0.021753347 | 0.002769123 |
| 0.000938398 | 8.67E-05    | 0.00036447  | 0.000176833 | 0           | 0.001256698 | 0           | 0.00010163  | 0           | 8.88E-05    | 0.000133824 |
| 0.000587912 | 0.347758268 | 0.002053762 | 0.006749377 | 0.202615915 | 0.006890506 | 0           | 0.002949488 | 0.00089921  | 0.001730472 | 0.00196618  |
| 0.074191374 | 0.002605222 | 0.004061243 | 0.025513002 | 0.017011278 | 0.031264242 | 0           | 0.009513478 | 0.001701512 | 0.004666622 | 0.000569609 |
| 0.052280349 | 0.000689442 | 0.001845493 | 0.02040416  | 0.020196977 | 0.002691816 | 0           | 0.010284543 | 0.001784897 | 0.00235215  | 0.00211373  |
| 0.004594475 | 0.011594883 | 0.003517429 | 0.017181043 | 0.002069627 | 0.014322091 | 0.0001666   | 0.005145585 | 0.001647424 | 0.002435578 | 0.002199514 |
| 0.000907306 | 0.000279665 | 0.007703055 | 0.002881339 | 0.012008537 | 0.030098693 | 0.000380056 | 0.008521478 | 0.018565637 | 0.002010361 | 0.023278477 |
| 0.005893252 | 0           | 0.002351702 | 0.000104019 | 0.000855655 | 0.00264915  | 0.000205647 | 0.002328659 | 0.008072604 | 0.001410213 | 0.034715264 |
| 0.045811905 | 0.00326924  | 0.018810727 | 0.0084761   | 0.012482378 | 0.03213307  | 0.000596115 | 0.014232658 | 0.059167544 | 0.003146067 | 0.002751966 |
| 0.018516399 | 0.001200915 | 0.019970669 | 0.003717953 | 0.038079574 | 0.002843085 | 0.00057529  | 0.018978351 | 0.011486896 | 0.005635471 | 0.000126961 |

|             |             |             |             |             |             |             |             |             |             |             |
|-------------|-------------|-------------|-------------|-------------|-------------|-------------|-------------|-------------|-------------|-------------|
| 0.005045302 | 7.03E-05    | 0.027696865 | 0.002310718 | 0.006054198 | 0.001648446 | 0           | 0.00502628  | 0.020449695 | 0.009879567 | 0           |
| 0.002625818 | 0.04407641  | 0.003945538 | 0.008419632 | 0.016357299 | 0.005618293 | 0.000197837 | 0.008930209 | 0.001363463 | 0.014691516 | 0.003825988 |
| 0.000322221 | 0.000367902 | 0.000613236 | 0.000622631 | 0.000254543 | 9.50E-05    | 0.00020044  | 0.000366753 | 0.00025241  | 0.000481733 | 0.000377452 |
| 0.005267182 | 0.002268727 | 0.008160089 | 0.006152008 | 0.007223136 | 0.01116677  | 0.000156187 | 0.014975001 | 0.008651794 | 0.009615825 | 0.001774023 |
| 0.005614841 | 0.000327522 | 0.000497531 | 0.002772862 | 0.000315241 | 0.001772565 | 0.000192631 | 0.000899207 | 0.000198322 | 0.004225257 | 0.000775492 |
| 0.002950866 | 0.002593258 | 0.004153807 | 0.001985286 | 0.002069627 | 0.002036316 | 0           | 0.013004257 | 0.001820956 | 0.003687008 | 0.005383834 |
| 0.008528962 | 0.004615221 | 0.012828783 | 0.005116271 | 0.013312578 | 0.005350663 | 0.000838206 | 0.054217546 | 0.008868145 | 0.012021799 | 0.012994633 |
| 0.005545592 | 0.001339999 | 0.011851076 | 0.001913958 | 0.003295348 | 0.001584448 | 0.000197837 | 0.012739135 | 0.011475628 | 0.004427101 | 0.003743635 |
| 0.01759496  | 0.000329018 | 0.012149016 | 0.004509987 | 0.006363565 | 0.009091667 | 0           | 0.033436363 | 0.002091395 | 0.017853731 | 0.004169126 |
| 0.003281566 | 0.001984575 | 0.001790534 | 0.000349208 | 0.000935934 | 0.000674893 | 0           | 0.010779438 | 0           | 0.000702415 | 0.000662256 |
| 0.026847506 | 0.013805284 | 0.032099437 | 0.01805332  | 0.013929355 | 0.020056745 | 0.001481177 | 0.049611043 | 0.013222213 | 0.036536365 | 0.026775053 |
| 0.001611105 | 0.000314062 | 0.000986384 | 0.000156029 | 3.92E-05    | 0.000882404 | 0           | 0.00239494  | 0.000175785 | 0.001011909 | 0.000291667 |
| 0.000240252 | 0.000463616 | 0.000888035 | 0.001746041 | 0.000256501 | 0.001095732 | 0           | 0.00109363  | 9.01E-05    | 0.003958824 | 0.003345595 |
| 0.001091029 | 0.002214887 | 0.000350007 | 0.000664239 | 0.00016839  | 0.003004051 | 0.000359231 | 0.010222681 | 0.000905971 | 0.007643141 | 0.012270612 |
| 0.001503698 | 0.002443704 | 0.000422323 | 0.001371571 | 0.00042489  | 0.001382756 | 0           | 0.004641853 | 0.000353824 | 0.004701608 | 0.007730898 |
| 0           | 3.89E-05    | 0.000182235 | 3.71E-05    | 0.000191886 | 0.000133815 | 0           | 0.000265122 | 0           | 0.000645899 | 0.000229902 |
| 0           | 0           | 0           | 3.71E-05    | 0.0001586   | 0           | 0.00074189  | 4.86E-05    | 8.34E-05    | 0.000543632 | 0.000741178 |
| 0           | 0           | 0           | 0           | 4.31E-05    | 0           | 0           | 0           | 0           | 0           | 0.000758335 |
| 0           | 0           | 0           | 2.23E-05    | 0           | 0           | 0           | 0           | 0           | 8.61E-05    | 0           |
| 6.64E-05    | 0           | 0.000133061 | 3.42E-05    | 6.66E-05    | 0           | 0           | 0           | 8.34E-05    | 0           | 0.00042206  |
| 3.96E-05    | 0           | 0           | 0           | 0           | 0           | 0           | 0           | 0           | 0           | 0           |
| 0           | 0           | 0           | 0           | 0           | 0           | 0           | 5.97E-05    | 9.47E-05    | 0.000290655 | 0.000682844 |
| 7.91E-05    | 0.000207879 | 0.000248766 | 0.000454714 | 0.000131187 | 4.65E-05    | 0           | 0.000262913 | 0.000811317 | 0.008076431 | 0.002614711 |
| 0           | 0.000459129 | 0           | 0.00043391  | 0.000107691 | 0           | 0.003061272 | 0.001193051 | 0.000570176 | 0.008383234 | 0.018453958 |
| 0           | 0.000213862 | 0           | 0.000115907 | 5.87E-05    | 0           | 0.000377453 | 0           | 0.000286215 | 0.00446747  | 0.002137749 |
| 0           | 5.83E-05    | 0           | 0.000301656 | 0           | 0           | 0.002397476 | 0.001239448 | 0.000108176 | 0.001041512 | 0.014339734 |
| 0           | 0.000152545 | 0           | 2.53E-05    | 0           | 6.01E-05    | 0.000156187 | 3.53E-05    | 0.000103668 | 0.000955393 | 0.002206377 |
| 0           | 0           | 0           | 0           | 0           | 0           | 0           | 0           | 0           | 0           | 0           |
| 0           | 0           | 0           | 0           | 0           | 0           | 0           | 0           | 0           | 0           | 0.000130392 |
| 0           | 0           | 7.23E-05    | 0           | 0           | 0           | 0           | 0           | 0.000180293 | 0.000166857 | 0.000380883 |
| 5.79E-05    | 0           | 7.81E-05    | 0           | 0           | 0           | 0           | 0           | 0           | 0.000188387 | 0.000675982 |
| 0           | 0           | 0           | 0           | 0           | 0           | 0           | 0           | 7.89E-05    | 0.000255668 | 0.000260785 |
| 0           | 0           | 4.63E-05    | 0           | 0           | 0           | 0.000403484 | 4.20E-05    | 0           | 0.001124941 | 0.000531864 |
| 0           | 4.04E-05    | 0.00012149  | 0           | 6.46E-05    | 0           | 0           | 0           | 0.000101415 | 0.000357936 | 0.000631374 |
| 0           | 0           | 0           | 0           | 0           | 0           | 0           | 0           | 8.79E-05    | 0.000637825 | 0.001259316 |
| 0.000537035 | 0.000177969 | 0.000138846 | 0.000457686 | 0.000542372 | 0.000397567 | 0           | 0.000384428 | 8.11E-05    | 9.42E-05    | 0           |
| 0           | 0           | 0           | 0           | 0           | 0           | 0           | 0           | 0           | 0           | 0           |
| 0           | 0           | 0           | 0           | 0           | 0           | 0           | 0           | 0           | 0           | 0           |
| 0           | 0           | 0           | 0           | 0           | 0           | 0           | 0           | 0           | 0           | 0           |
| 0           | 0           | 0           | 0           | 0           | 0           | 0           | 0           | 0           | 0           | 0           |
| 0.003547257 | 0.000620647 | 0.003560819 | 0.001170962 | 0.004023731 | 0.003649854 | 0           | 0.000706993 | 0.001005132 | 0.002570141 | 0.004604911 |
| 0.000132845 | 0.000311071 | 0.000506209 | 0.000952521 | 0.00093985  | 0.000622531 | 0           | 0.000985372 | 0.00210717  | 0.002976519 | 0.001931867 |
| 0.036751561 | 0.006169082 | 0.010997752 | 0.013721653 | 0.008556548 | 0.020537704 | 0.000205647 | 0.011687482 | 0.014276925 | 0.01215367  | 0.010108843 |
| 0.278431406 | 0.090956948 | 0.068092344 | 0.20822467  | 0.064781093 | 0.220302267 | 0.011531834 | 0.140570146 | 0.079191297 | 0.091801117 | 0.135028206 |
| 0.045506643 | 0.008790755 | 0.004489351 | 0.032329248 | 0.009654997 | 0.024631669 | 0.001507208 | 0.016775625 | 0.008838848 | 0.033872031 | 0.030882413 |
| 0.000327874 | 0.002316584 | 0.000127275 | 0.00146073  | 0.000601112 | 0.000255994 | 0.000564878 | 0.003256588 | 0.000367346 | 0.005689296 | 0.002038239 |
| 1.84E-05    | 0           | 0           | 2.23E-05    | 0           | 0.000250176 | 0           | 0.000223145 | 0           | 0.000742784 | 0.000953923 |

| H131        | H132        | H133        | H135        | H136        | H137        | H138        | H139        | H140        | H141        | H142        |
|-------------|-------------|-------------|-------------|-------------|-------------|-------------|-------------|-------------|-------------|-------------|
| 0.005503994 | 0.030052156 | 0.008198404 | 0.043603297 | 0.094297545 | 0.000616916 | 0.016576167 | 0.008672967 | 0.009468538 | 0.04944691  | 0.010733851 |
| 0.00545779  | 0.002861418 | 0.004645113 | 0.00906033  | 0.015243533 | 0.008746879 | 0.076957197 | 0.004745258 | 0.004160201 | 0.012297323 | 0.009269897 |
| 0.01633583  | 0.002017899 | 0.00016457  | 0.011719739 | 0.020875814 | 0.005830287 | 0.014576582 | 0.01551416  | 0.002324976 | 0.007087128 | 0.008449648 |
| 0.007080689 | 0.013365402 | 0.002652581 | 0.043966444 | 0.057535243 | 0.006105438 | 0.024345574 | 0.0057402   | 0.002416469 | 0.008440937 | 0.004538529 |
| 0.003930186 | 0.000936233 | 0.000118561 | 0.021565053 | 0.032004438 | 0.0050338   | 0.007200652 | 0.000590024 | 0.00117684  | 0.002392168 | 0.004910628 |
| 0.005706134 | 0.001557964 | 0.00232875  | 0.018168346 | 0.024057521 | 0.006699183 | 0.047718184 | 0.013618756 | 0.001654034 | 0.014642174 | 0.009973355 |
| 2.89E-05    | 0.000138162 | 0.000254818 | 0.002263248 | 0.002887784 | 0.000666153 | 0.004786127 | 0.001010368 | 0.000814459 | 0.001813842 | 0.001597041 |
| 0.001550705 | 0.001905188 | 0.000430005 | 0.002087177 | 0.004438223 | 0.002230165 | 0.00686083  | 0.015508375 | 0.001010001 | 0.002237072 | 0.011328667 |
| 0.032198074 | 0.028076069 | 0.016614464 | 0.025101149 | 0.034605648 | 0.019402432 | 0.075368975 | 0.075594411 | 0.01543526  | 0.043127379 | 0.052778389 |
| 0.003009004 | 0.003337715 | 0.003480738 | 0.00259705  | 0.015445604 | 0.001859436 | 0.040395911 | 0.024451287 | 0.005349599 | 0.04219417  | 0.011086938 |
| 0.002284186 | 0.001781569 | 0.00126878  | 0.001775385 | 0.002733475 | 0.004709412 | 0.002843775 | 0.001908901 | 0.002002063 | 0.004963092 | 0.001510127 |
| 0.049440649 | 0.049402175 | 0.080090602 | 0.144668161 | 0.090932137 | 0.294008098 | 0.054024567 | 0.010088253 | 0.017817644 | 0.083087106 | 0.109285922 |
| 0.000976049 | 0.000594462 | 0.000215887 | 0.000165067 | 0.000804612 | 0.000993437 | 0.000722569 | 0.000123404 | 0.001399291 | 0.000780741 | 0.000616545 |
| 0           | 0           | 0.001861584 | 0.00787185  | 0.00177088  | 0           | 0.000833459 | 0.001232109 | 0.000737319 | 0.002915291 | 0.00205877  |
| 0.002261085 | 0.001517969 | 0.001240466 | 0.0083267   | 0.00203541  | 0.004301032 | 0.007064724 | 0.00225983  | 0.000608154 | 0.004332191 | 0.002159264 |
| 0.027023281 | 0.001603412 | 0.001017501 | 0.016044487 | 0.003629937 | 0.006203912 | 0.028688143 | 3.09E-05    | 0.003785263 | 0.003924733 | 0.000961484 |
| 0.041184658 | 0.05001118  | 0.038502239 | 0.083641152 | 0.115379104 | 0.003240979 | 0.062119489 | 0.053877287 | 0.01919182  | 0.068087422 | 0.116073344 |
| 0.055097692 | 0           | 6.02E-05    | 0.030500666 | 0.01453812  | 0.033959324 | 0.079872513 | 0.000497471 | 0.000267301 | 0.004029884 | 0.000562223 |
| 0.000981825 | 0           | 0           | 0.000803325 | 0.00052906  | 0.000961577 | 0.00084419  | 0           | 9.33E-05    | 0.000764968 | 0           |
| 0.006439615 | 0.000136345 | 0.000318522 | 0.007207914 | 0.006253192 | 0.002725435 | 0.009829803 | 0.003497724 | 0.000432345 | 0.001900591 | 0.0127383   |
| 0.043974195 | 0.012407354 | 0.011514572 | 0.05220144  | 0.039234921 | 0.00763759  | 0.047761109 | 0.031466017 | 0.005878818 | 0.004082459 | 0.0402112   |
| 0.003777137 | 0.001216193 | 0.000826388 | 0.003297667 | 0.004089191 | 0.000437344 | 0.005215376 | 0.002820932 | 0.000525631 | 0.000186642 | 0.004150133 |
| 0.00331799  | 0.000961684 | 0.001705863 | 0.002971201 | 0.004155323 | 0.001720413 | 0.001799269 | 0.00074235  | 0.000782168 | 0.002016256 | 0.002648154 |
| 0.001510277 | 0.000825339 | 0.000916636 | 0.00077398  | 0.002061128 | 0.000816762 | 0.00151668  | 0.000347073 | 0.000349823 | 0.001219743 | 0.0011842   |
| 0.001807713 | 0.00095623  | 0.000199961 | 0           | 0.000209419 | 8.98E-05    | 0.000236087 | 0.000341288 | 0.00069247  | 0.00018927  | 0           |
| 0.018622904 | 0.007197174 | 0.004954788 | 0.001060095 | 0.001296931 | 0.001477122 | 0.003691542 | 0.006648375 | 0.018348657 | 0.005399466 | 0.00588026  |
| 0.001094446 | 0.000716263 | 0.000902479 | 0           | 0           | 0.00011006  | 0.000296897 | 0.000782842 | 0.001485402 | 0.000504721 | 0.000401976 |
| 0.000424495 | 0           | 0.000387535 | 0           | 0           | 0           | 0           | 0           | 2.69E-05    | 0           | 0           |
| 0.002541193 | 0.00028905  | 0.003312629 | 0           | 0           | 0           | 8.23E-05    | 5.78E-05    | 3.95E-05    | 0           | 0.000138519 |
| 0.000872091 | 6.54E-05    | 0.002877316 | 0           | 0           | 0           | 7.15E-05    | 5.40E-05    | 3.41E-05    | 0           | 0           |
| 0.003673179 | 0.00074535  | 0.003730247 | 0           | 8.45E-05    | 0           | 0           | 3.86E-05    | 5.02E-05    | 0.000118294 | 0.000814817 |
| 0.00072193  | 0.000172703 | 0.002227885 | 0           | 0           | 0.000104267 | 0           | 0           | 0           | 6.31E-05    | 0.000225433 |
| 0.000929846 | 6.18E-05    | 0.001737715 | 0           | 0           | 0           | 8.58E-05    | 0           | 0           | 0           | 7.60E-05    |
| 0.000395618 | 0           | 0.000465396 | 0           | 0           | 5.79E-05    | 0           | 0           | 0           | 0           | 0           |
| 0.018224399 | 0.022122357 | 0.054224841 | 0.019367831 | 0.004603554 | 0.045816848 | 0.00642085  | 0.010130673 | 0.03550074  | 0.068628946 | 0.032247726 |
| 0.015463739 | 0.022609562 | 0.074905771 | 0.026667449 | 0.05997847  | 0.011950207 | 0.003630731 | 0.013260114 | 0.021342782 | 0.083247461 | 0.011888175 |
| 0.049925786 | 0.230511365 | 0.041353011 | 0.059460709 | 0.047468413 | 0.118902527 | 0.139638286 | 0.230672377 | 0.274128358 | 0.096601544 | 0.112911856 |
| 0.001695091 | 0.001021675 | 0.004011608 | 0.00029712  | 0.00203541  | 0.000952888 | 0.001802846 | 0.001330446 | 0.004953133 | 0.000778112 | 0.003492847 |
| 0.00111466  | 0.001119843 | 0.004561944 | 0.000520877 | 0.001216103 | 0.006519611 | 0.000829881 | 0.000154255 | 0.002377001 | 0.001790183 | 0           |
| 0.000326312 | 0.000189064 | 0.000392844 | 0           | 0           | 0.034715263 | 0.000121621 | 2.70E-05    | 0.000486164 | 0.000152468 | 0           |
| 0.001094446 | 0.070459227 | 0.004813222 | 0.001529618 | 8.45E-05    | 0.016955043 | 0.00810923  | 0.011100549 | 0.020449388 | 0.003627684 | 0.005961742 |
| 0.00206472  | 0.061118716 | 0.007538355 | 0.001349879 | 0.001069141 | 0.010603419 | 0.000178854 | 0.019114077 | 0.007333722 | 0.00133278  | 6.79E-05    |
| 0.001712418 | 0.004821143 | 9.73E-05    | 0.002222899 | 0.000360055 | 0.009969125 | 0.000883538 | 0.001307308 | 0.008768893 | 0.001721836 | 0.000111358 |
| 8.37E-05    | 0.005579219 | 0.006154554 | 0.019987748 | 0.001506351 | 0.00718866  | 0.011342906 | 0.000433841 | 0.011811454 | 0.002216042 | 0.006206187 |
| 0.013598272 | 0.019939027 | 0.003868273 | 0.001250839 | 0.000385773 | 0.016850776 | 0.002611265 | 0           | 0.00226757  | 0.000262876 | 0.002849142 |
| 0.00010107  | 0.007646202 | 0.006673037 | 0.00196246  | 0.024608624 | 0.006374795 | 0.013689467 | 0           | 6.10E-05    | 0.006290614 | 5.70E-05    |
| 0.000851877 | 0.042946715 | 0.00707119  | 0.001316866 | 0.003104552 | 0.051059183 | 0.00081915  | 0           | 0.044859847 | 0.002415827 | 0           |
| 0.018233062 | 0.00085988  | 0.011760542 | 0.020314214 | 0.002123587 | 0.010866984 | 0.000744032 | 0.000250664 | 0.006696865 | 0.000257618 | 0           |



|             |             |             |             |             |             |             |             |             |             |             |
|-------------|-------------|-------------|-------------|-------------|-------------|-------------|-------------|-------------|-------------|-------------|
| 0.02270614  | 0.000318137 | 0.016750721 | 0.061096703 | 8.45E-05    | 0.013798057 | 0.000629565 | 3.86E-05    | 0.001680944 | 0.000226073 | 0           |
| 0.021374901 | 0.006348202 | 0.049261206 | 0.007824164 | 0.012796632 | 0.003660945 | 0.008348894 | 0.024572763 | 0.008460331 | 0.060306303 | 0.014816082 |
| 0.001530491 | 0.00035995  | 0.000828157 | 0.000612581 | 0           | 0.000321491 | 0.000457866 | 0.000501328 | 0.000749877 | 0.000310193 | 0.000624693 |
| 0.012951423 | 0.00254328  | 0.000525561 | 0.005076719 | 0.006932887 | 0.011147927 | 0.001026621 | 0.002917341 | 0.011709199 | 0.000452146 | 0.00568742  |
| 0.008842198 | 0.000401762 | 0.000598114 | 0.008521112 | 0.001006683 | 0.000793591 | 0.000955079 | 5.01E-05    | 0.001004619 | 0.001177683 | 0.00217556  |
| 0.002278411 | 0.001530695 | 0.000608731 | 0.000447514 | 0.000110221 | 0.000506856 | 0.001237668 | 0.000173536 | 0.005213257 | 0.000102522 | 0.000244445 |
| 0.018573813 | 0.004132149 | 0.014255632 | 0.005080388 | 0.000191049 | 0.021348757 | 0.005995178 | 0.006490264 | 0.074601964 | 0.003441042 | 0.004356553 |
| 0.007461868 | 0.003304992 | 0.00347543  | 0.006492625 | 0.00030127  | 0.00713363  | 0.00250753  | 0.000160039 | 0.018318159 | 0.000864861 | 0.000812101 |
| 5.49E-05    | 0.004548454 | 0.000116791 | 0.001445251 | 0           | 0.004555908 | 0           | 0.011812048 | 0.032626811 | 0           | 0.001309139 |
| 0.002211993 | 0           | 0           | 0           | 0           | 0.0005503   | 7.87E-05    | 0.000320078 | 0.002330358 | 0           | 0.000200988 |
| 0.054690523 | 0.016083203 | 0.017362991 | 0.014602904 | 0.010834702 | 0.027170356 | 0.018579329 | 0.022430552 | 0.046872673 | 0.020538474 | 0.034833411 |
| 0.001778835 | 0.000390854 | 0.001189149 | 0           | 9.92E-05    | 0.000808073 | 0.000457866 | 0.00139022  | 0.000827017 | 9.20E-05    | 0           |
| 0.011045528 | 0.001187107 | 0.003137442 | 0.037517836 | 0.00051069  | 0.000477892 | 0.002078281 | 3.28E-05    | 0.004036417 | 0.026521524 | 0.001290126 |
| 0.072265185 | 0.000449028 | 6.90E-05    | 0.000242098 | 0           | 0.000755939 | 0.001169704 | 0           | 0.006858322 | 0.002137179 | 0.000195556 |
| 0.012330563 | 0.000765347 | 0.001904054 | 0.001639663 | 0.001116904 | 0.000666153 | 0.000450711 | 0.00033936  | 0.016520608 | 0.00308616  | 0.002634574 |
| 0           | 0.000127255 | 0.000150413 | 0.000810661 | 0.000323314 | 0.000318595 | 0.000346976 | 0           | 0.000611741 | 0.000178755 | 0.000640989 |
| 0           | 0           | 0           | 0.000506205 | 0.000845026 | 0           | 0.000575909 | 0.000175465 | 0           | 0.000325966 | 0.002047906 |
| 0           | 0           | 0           | 0           | 0.000235138 | 0.000263565 | 0.000114466 | 0           | 0           | 5.52E-05    | 0.000469878 |
| 0           | 0           | 0           | 0           | 0           | 0           | 0.000107312 | 4.43E-05    | 0           | 4.73E-05    | 0           |
| 0           | 0           | 0           | 0           | 0.000117569 | 6.66E-05    | 0           | 0.000194746 | 0           | 0.000155097 | 0.000249877 |
| 0           | 0           | 0           | 0           | 0           | 0           | 0.000103735 | 0.000241023 | 0           | 0           | 0.000173828 |
| 0           | 0           | 0           | 0           | 0.000429861 | 0.000101371 | 0           | 0           | 0           | 3.68E-05    | 0.000135803 |
| 0           | 0           | 0           | 0.006929135 | 0.008303298 | 0.000923925 | 0.003727312 | 0.001629315 | 0           | 0.004098231 | 0.004410874 |
| 0           | 0           | 0           | 0.010087412 | 0.016889496 | 0.001401818 | 0.009447056 | 8.87E-05    | 0           | 0.003982566 | 0.004717788 |
| 0           | 0           | 0           | 0.004621869 | 0.007888133 | 0.000894962 | 0.007214961 | 0.000121476 | 0           | 0.002087233 | 0.002088647 |
| 0           | 0           | 0           | 0.002670413 | 0.007101892 | 0.000167986 | 0.004825474 | 0           | 0           | 0.001083048 | 0.001387904 |
| 0           | 0           | 0           | 0.00180473  | 0.001278561 | 0           | 0.001616838 | 0.000397206 | 0           | 0.000644045 | 0.001795313 |
| 0           | 0           | 0           | 0           | 0           | 0           | 0           | 0           | 0           | 0           | 6.79E-05    |
| 0           | 0           | 0           | 0           | 0.000815634 | 0           | 0.000250395 | 9.64E-05    | 0           | 0.000302307 | 0.000304198 |
| 0           | 0           | 0           | 0.000286116 | 0.000698065 | 0.000333077 | 0.000418518 | 0.000322007 | 6.82E-05    | 0.000239217 | 0.000575804 |
| 0           | 0           | 0           | 0.000135722 | 0.000433535 | 0.00011006  | 0.000132352 | 0.000501328 | 0           | 0.000252361 | 0.00070889  |
| 0           | 0           | 0           | 0.000117381 | 0.000676021 | 8.40E-05    | 0.000690376 | 2.89E-05    | 0           | 7.10E-05    | 0.00048889  |
| 0           | 0           | 0           | 0.000902365 | 0.000980965 | 7.24E-05    | 0.000511522 | 0.000669079 | 0           | 0.000772854 | 0.00165951  |
| 0           | 0           | 0           | 0.000322797 | 0.000580496 | 8.11E-05    | 0.000261126 | 0.000412631 | 0           | 0.000462661 | 0.000342223 |
| 0           | 0           | 0           | 0           | 0.000286574 | 8.40E-05    | 0.000572332 | 0.000734638 | 0           | 0.000733423 | 0.000673582 |
| 0.000617972 | 0.000532653 | 0.000104404 | 0           | 0.000345358 | 0           | 0.000228933 | 0.000622803 | 0.001975154 | 0.000449517 | 0.000363951 |
| 0           | 0           | 0           | 0           | 0           | 0           | 0           | 0           | 0           | 0           | 0           |
| 0           | 0           | 0           | 0           | 0           | 0           | 0           | 0           | 0           | 0           | 0           |
| 0           | 0           | 0           | 0           | 0           | 0           | 0           | 0           | 0           | 0           | 0           |
| 0           | 0           | 0           | 0           | 0.000135939 | 0           | 0           | 0.000119547 | 0           | 2.63E-05    | 0.000499754 |
| 0.002622049 | 0.001919731 | 0.050537064 | 0.000751971 | 0.004757863 | 0.008622338 | 0.00122336  | 0.01524807  | 0.022207472 | 0.002392168 | 0.026894381 |
| 0.005249874 | 0.005026569 | 0.020135903 | 0           | 0.000106547 | 0.007837435 | 0.001287747 | 0.007213332 | 0.003159169 | 0.004392652 | 0.030009696 |
| 0.011877191 | 0.070761003 | 0.034076551 | 0.003877234 | 0.005885789 | 0.011950207 | 0.007483241 | 0.03038045  | 0.022611114 | 0.008338416 | 0.026345738 |
| 0.16651458  | 0.153836645 | 0.311134115 | 0.059295642 | 0.135887516 | 0.092172412 | 0.092385122 | 0.240392347 | 0.117804189 | 0.128007297 | 0.135218819 |
| 0.018920339 | 0.019099144 | 0.038951709 | 0.040452356 | 0.022474015 | 0.010687412 | 0.008921226 | 0.057801139 | 0.037698345 | 0.03301981  | 0.017021519 |
| 0.065146956 | 0.000398126 | 0.008177169 | 0.016668073 | 0.008865424 | 0.000573471 | 0.000372016 | 0.001293811 | 0.00177423  | 0.046720889 | 0.066918173 |
| 0.004311365 | 8.18E-05    | 0           | 0.001470928 | 0           | 8.69E-05    | 0           | 0           | 0.000884424 | 0.000299678 | 0.002449882 |

| H143        | H146        | H147        | H149        | H150        |
|-------------|-------------|-------------|-------------|-------------|
| 0.007408308 | 0.003896391 | 0.003670487 | 0.01149222  | 0.065960524 |
| 0.003473911 | 0.004709838 | 0.006474561 | 0.00181121  | 0.019270457 |
| 0.003271297 | 0           | 0.001647013 | 0.000209893 | 0.007913969 |
| 0.002070348 | 0.015686518 | 0.00210098  | 0.001264073 | 0.016295369 |
| 0.00473196  | 0.007070582 | 0.000445662 | 0           | 0.003959925 |
| 0.008522685 | 0.003232432 | 0.006961745 | 0.002789923 | 0.019264577 |
| 0.00069073  | 0.000275679 | 0.003501633 | 0.000488178 | 0.00186384  |
| 0.002097977 | 0.000339745 | 0.00179649  | 0.000981072 | 0.008660681 |
| 0.013613825 | 0.013275298 | 0.031096717 | 0.024045695 | 0.059892756 |
| 0.001643016 | 0.005979514 | 0.003244201 | 0.003296968 | 0.014131668 |
| 0.001668803 | 0.001687077 | 0.004218568 | 0.000931547 | 0.002963329 |
| 0.111071202 | 0.315502862 | 0.319622986 | 0.083806182 | 0.11143057  |
| 0.000488116 | 5.05E-05    | 0.003025522 | 0.000650903 | 0.00016169  |
| 0.00246084  | 0.000712494 | 0.006042739 | 0.000837213 | 0.001978492 |
| 0.003772306 | 0.004090531 | 0.003377069 | 0.000132067 | 0.002928051 |
| 0.00848953  | 0.00171814  | 0.032818469 | 0.001068331 | 0.00573263  |
| 0.064271031 | 0.013504384 | 0.072313569 | 0.014102909 | 0.153843214 |
| 0.008419536 | 0.0009144   | 0.001475392 | 0.001087197 | 0.022463091 |
| 0.000300237 | 4.85E-05    | 0.000102419 | 0.00037026  | 0.000179328 |
| 0.005448477 | 0.003024702 | 0.004240713 | 0.001360766 | 0.003727679 |
| 0.010093866 | 0.035139354 | 0.029613021 | 0.002447963 | 0.021901587 |
| 0.000729411 | 0.003706134 | 0.002388861 | 0.000495253 | 0.00200789  |
| 0.002035351 | 0.005039876 | 0.003759065 | 0.00032781  | 0.008110937 |
| 0.000758882 | 0.002917925 | 0.002123125 | 0.000325452 | 0.002116663 |
| 0           | 0           | 0           | 0.00022876  | 0.000188148 |
| 0.001468031 | 0.000421284 | 0.000503792 | 0.003438468 | 0.000790809 |
| 7.92E-05    | 0           | 0           | 0.000297152 | 0.000111713 |
| 0           | 0.000644545 | 0           | 0           | 0           |
| 0           | 0.003581884 | 0.000124564 | 6.60E-05    | 0           |
| 8.10E-05    | 0.002158838 | 0           | 5.42E-05    | 0           |
| 0.000180511 | 0.004057528 | 0           | 5.90E-05    | 0.000105833 |
| 0           | 0.001230848 | 0           | 0           | 0           |
| 0           | 0.001502644 | 0.000105187 | 0           | 0           |
| 6.63E-05    | 0.000722201 | 0           | 0           | 0           |
| 0.018211323 | 0.077698741 | 0.042415435 | 0.065241282 | 0.052460915 |
| 0.01845446  | 0.248542008 | 0.016132425 | 0.002436171 | 0.050029692 |
| 0.04959072  | 0.009936089 | 0.108680729 | 0.212567154 | 0.07067304  |
| 0.001086748 | 0.002096713 | 0.001184742 | 0.007247197 | 0.00046743  |
| 0.000613368 | 0.001116305 | 0.002408238 | 0.007284931 | 0.000105833 |
| 0.000775459 | 4.27E-05    | 0           | 0.000141501 | 0           |
| 0.003820197 | 5.82E-05    | 0.009151304 | 0.045504285 | 0           |
| 0.007067548 | 0           | 0.000589603 | 0.001622542 | 0           |
| 0.003164464 | 3.69E-05    | 0.000656037 | 0.002872465 | 0.000561504 |
| 0.001388827 | 8.74E-05    | 0.006884238 | 0.010673874 | 0.000676156 |
| 0.002169813 | 0.00139975  | 0.001259481 | 0.006539693 | 0.000273402 |
| 0.000296553 | 0.02383846  | 0.001768809 | 0.002294671 | 0.027449009 |
| 0.015667595 | 0.002609243 | 0.010981011 | 0.001955069 | 0.001275878 |
| 0.028036264 | 0.037459328 | 0.007163816 | 0.003563461 | 0.015381088 |

|             |             |             |             |             |
|-------------|-------------|-------------|-------------|-------------|
| 0.001794056 | 0.020924417 | 0.004409567 | 0.000224043 | 0.007058485 |
| 0.006601535 | 0.000343628 | 0.004094004 | 0.002518713 | 0.000420393 |
| 8.47E-05    | 5.82E-05    | 0.000368156 | 0.000240551 | 6.76E-05    |
| 0.00424016  | 0.000731908 | 0.014385761 | 0.009152741 | 0.001014235 |
| 0.00063363  | 5.05E-05    | 0.003783978 | 0.001176815 | 0.000496828 |
| 0.000744146 | 4.47E-05    | 0.007354814 | 0.002570597 | 0.00046743  |
| 0.018857846 | 0.048360293 | 0.055976305 | 0.018425757 | 0.001464026 |
| 0.008681093 | 8.74E-05    | 0.006225433 | 0.003386585 | 0.000764351 |
| 0.211998806 | 0           | 0.009859935 | 0           | 0.000593842 |
| 0.000486274 | 0           | 0           | 0.001372557 | 0.000191088 |
| 0.145246673 | 0.025902169 | 0.037153297 | 0.042193167 | 0.012117898 |
| 0.019333068 | 0           | 0.000107955 | 0.00561758  | 0.000108773 |
| 0.000674152 | 0.000163078 | 0.000584067 | 0.001712159 | 8.23E-05    |
| 0.0005489   | 0           | 0.001129381 | 0.000622603 | 0.000346898 |
| 0.002497679 | 0.000108718 | 0.002469136 | 0.000999939 | 0.000352777 |
| 0.000429173 | 0           | 0.000218679 | 0.000474028 | 0           |
| 0.000342602 | 0           | 0           | 7.78E-05    | 0.000537985 |
| 0.000163933 | 0           | 0           | 6.84E-05    | 7.64E-05    |
| 8.29E-05    | 0           | 0.000226983 | 0.000372619 | 0           |
| 0.000222875 | 0           | 0.000124564 | 0.000943338 | 0.000102893 |
| 0.000158407 | 0           | 0           | 0.000334885 | 0.000102893 |
| 0.00026524  | 0           | 0           | 5.66E-05    | 0.00046449  |
| 0.005730295 | 0           | 0.002399934 | 0.000436294 | 0.005256381 |
| 0.004057808 | 0           | 0.00024636  | 0           | 0.004738974 |
| 0.002197442 | 0           | 0.000226983 | 0           | 0.003518953 |
| 6.82E-05    | 0           | 0           | 7.55E-05    | 0.001828562 |
| 0.000537848 | 0           | 0           | 0           | 0.000655578 |
| 0           | 0           | 0           | 0           | 0           |
| 0           | 0           | 0.000476111 | 0.000568361 | 0.000393935 |
| 0.000528639 | 5.05E-05    | 0.000470575 | 0.00183951  | 0.000911341 |
| 0.000607842 | 0           | 0.00060898  | 0.002289954 | 0.001596317 |
| 0.00015104  | 0           | 0.000226983 | 0.000275926 | 0.000996596 |
| 0.000143672 | 0           | 0.000132868 | 7.31E-05    | 0.00062324  |
| 0.000237611 | 0           | 0.000193766 | 0.000424502 | 0.00015875  |
| 0.000313131 | 0           | 0           | 0.000469311 | 0.000435092 |
| 0.000152882 | 0           | 0           | 0.000283002 | 0           |
| 0           | 0           | 0           | 0           | 0           |
| 0           | 0           | 0           | 0           | 0           |
| 0           | 0           | 0           | 0           | 0           |
| 8.66E-05    | 0           | 0           | 7.08E-05    | 0           |
| 0.000302079 | 0.001452168 | 0.00130377  | 0.003881837 | 0.000296921 |
| 0           | 0.000770736 | 0.000891325 | 0.00132539  | 0.000246944 |
| 0.008902126 | 0.000813447 | 0.006189448 | 0.01519954  | 0.007008508 |
| 0.117090683 | 0.03230685  | 0.071912196 | 0.303983718 | 0.149768637 |
| 0.013868013 | 0.004737018 | 0.009682777 | 0.046843826 | 0.017168492 |
| 0.00103149  | 0.00132986  | 0.000495488 | 0.000858438 | 0.000179328 |
| 0.000154723 | 0           | 0           | 0.000148576 | 7.64E-05    |

**Supplementary table S20. The cladogram of oropharyngeal microbial structure and their predominant bacteria among the CC (n=73), CCR (n=21), and H (n=140) groups.**

| Biomaker_names                                                                                                                                | Logarithm value | Groups | LDA_value | P_value  |
|-----------------------------------------------------------------------------------------------------------------------------------------------|-----------------|--------|-----------|----------|
| d__Bacteria.p__Actinobacteriota.c__Actinobacteria.o__Micrococcales.f__Dermabacteraceae.g__Brachybacterium                                     | 0.15490196      |        |           | -        |
| d__Bacteria.p__Bacteria_unclassified                                                                                                          | 2.987059901     |        |           | -        |
| d__Bacteria.p__Firmicutes.c__Clostridia.o__Clostridia_unclassified.f__Clostridia_unclassified                                                 | 0.02413368      |        |           | -        |
| d__Bacteria.p__Synergistota.c__Synergistia.o__Synergistales.f__Synergistaceae.g__Freitbacterium                                               | 2.700777865     | H      | 3.2354756 | 2.62E-14 |
| d__Bacteria.p__Proteobacteria.c__Gammaproteobacteria.o__Oceanospirillales.f__Halomonadaceae.g__Halomonas                                      | 3.951764536     | CC     | 3.6185261 | 1.56E-10 |
| d__Bacteria.p__Actinobacteriota.c__Actinobacteria.o__Actinomycetales.f__Actinomycetaceae.g__Actinomyces                                       | 4.754205971     | CC     | 4.3535641 | 0.000395 |
| d__Bacteria.p__Patescibacteria.c__Saccharimonadia.o__Saccharimonadales.f__Saccharimonadales.g__Saccharimonadales                              | 3.379029544     | H      | 3.088748  | 6.45E-20 |
| d__Bacteria.p__Actinobacteriota.c__Actinobacteria.o__Micrococcales.f__Micrococcaceae.g__Kocuria                                               | 1.468241804     |        |           | -        |
| d__Bacteria.p__Proteobacteria.c__Gammaproteobacteria.o__Xanthomonadales.f__Xanthomonadaceae.g__Stenotrophomonas                               | 1.64528188      |        |           | -        |
| d__Bacteria.p__Bacteroidota.c__Bacteroidia.o__Cytophagales                                                                                    | 0.99906837      |        |           | -        |
| d__Bacteria.p__Actinobacteriota.c__Coriobacteriia.o__Coriobacteriales.f__Atopobiaceae.g__Olsenella                                            | 2.197024436     |        |           | -        |
| d__Bacteria.p__Firmicutes.c__Negativicutes.o__Veillonellales.f__Veillonellaceae.g__Anaeroglobus                                               | 2.229955955     | H      | 3.1168809 | 1.37E-08 |
| d__Bacteria.p__Firmicutes.c__Clostridia.o__Peptostreptococcales.f__Tissierellales.f__Anaerovoracaceae.g__Anaerovoracaceae_Family_XIII_UCG_001 | 2.155053936     | H      | 3.2687248 | 1.51E-06 |
| d__Bacteria.p__Proteobacteria.c__Gammaproteobacteria.o__Burkholderiales.f__Comamonadaceae.g__Aquabacterium                                    | 1.405443938     |        |           | -        |
| d__Bacteria.p__Proteobacteria.c__Alphaproteobacteria.o__Caulobacteriales.f__Caulobacteraceae                                                  | 2.039640698     | H      | 3.5912138 | 1.39E-11 |
| d__Bacteria.p__Planctomycetota.c__Planctomycetes                                                                                              | 0.516629796     |        |           | -        |
| d__Bacteria.p__Actinobacteriota.c__Actinobacteria.o__Propionibacteriales.f__Propionibacteriaceae.g__Cutibacterium                             | 1.953207242     |        |           | -        |
| d__Bacteria.p__Spirochaetota.c__Spirochaetia.o__Spirochaetales.f__Spirochaetaceae.g__Sphaerochaeta                                            | 1.442887648     |        |           | -        |
| d__Bacteria.p__Firmicutes.c__Clostridia.o__Lachnospirales.f__Lachnospiraceae.g__Lachnospiraceae_UCG_001                                       | 1.851782332     |        |           | -        |
| d__Bacteria.p__Bacteroidota.c__Bacteroidia.o__Bacteroidales.f__Bacteroidaceae.g__Bacteroides                                                  | 3.802908536     | H      | 3.4875803 | 3.81E-20 |
| d__Bacteria.p__Firmicutes.c__Clostridia.o__Oscillospirales.f__Oscillospiraceae                                                                | 3.21248249      | H      | 3.0661856 | 4.70E-15 |
| d__Bacteria.p__Firmicutes.c__Clostridia.o__Oscillospirales.f__Oscillospiraceae.g__Colidextribacter                                            | 1.792791777     |        |           | -        |
| d__Bacteria.p__Bacteroidota.c__Bacteroidia.o__Bacteroidales.f__Barnesiellaceae.g__Barnesiella                                                 | 1.765668555     |        |           | -        |
| d__Bacteria.p__Proteobacteria.c__Gammaproteobacteria.o__Cardiobacteriales.f__Cardiobacteriaceae.g__Cardiobacterium                            | 3.215095978     | CCR    | 3.2872268 | 1.87E-07 |
| d__Bacteria.p__Verrucomicrobiota.c__Verrucomicrobiae                                                                                          | 1.819308864     |        |           | -        |
| d__Bacteria.p__Actinobacteriota.c__Actinobacteria.o__Pseudonocardiales.f__Pseudonocardaceae.g__Saccharopolyspora                              | 0               |        |           | -        |
| d__Bacteria.p__Proteobacteria.c__Gammaproteobacteria.o__Burkholderiales.f__Alcaligenaceae                                                     | 2.538896749     | H      | 3.0300357 | 2.51E-27 |
| d__Bacteria.p__Synergistota.c__Synergistia.o__Synergistales.f__Synergistaceae.g__Synergistaceae_uncultured                                    | 0.71531635      |        |           | -        |
| d__Bacteria.p__Firmicutes.c__Clostridia.o__Peptostreptococcales.f__Tissierellales.f__Anaerovoracaceae.g__Mogibacterium                        | 2.076458388     | H      | 3.4161974 | 6.09E-13 |
| d__Bacteria.p__Firmicutes.c__Clostridia.o__Clostridiales                                                                                      | 1.746356144     |        |           | -        |
| d__Bacteria.p__Patescibacteria.c__Gracilibacteria.o__Gracilibacteria.f__Gracilibacteria                                                       | 2.73900693      |        |           | -        |
| d__Bacteria.p__Cyanobacteria.c__Cyanobacteriia.o__Cyanobacteriales                                                                            | 0.496336485     |        |           | -        |
| d__Bacteria.p__Actinobacteriota.c__Coriobacteriia.o__Coriobacteriales.f__Atopobiaceae.g__Atopobium                                            | 3.413153617     | H      | 3.0576504 | 8.89E-09 |
| d__Bacteria.p__Firmicutes.c__Bacilli                                                                                                          | 5.520108498     | CCR    | 5.0875214 | 1.39E-06 |
| d__Bacteria.p__Actinobacteriota.c__Coriobacteriia.o__Coriobacteriales                                                                         | 3.450941579     | H      | 3.0843799 | 9.54E-10 |
| d__Bacteria.p__Campilobacterota.c__Campylobacteriia.o__Campylobacteriales.f__Campylobacteraceae.g__Campylobacter                              | 3.990877424     | H      | 3.5327816 | 1.88E-15 |
| d__Bacteria.p__Bacteroidota.c__Bacteroidia.o__Bacteroidales.f__Prevotellaceae.g__Prevotellaceae_unclassified                                  | 2.375820324     | H      | 3.0750941 | 5.96E-15 |
| d__Bacteria.p__Proteobacteria.c__Alphaproteobacteria.o__Sphingomonadales.f__Sphingomonadaceae.g__Sphingomonadaceae_unclassified               | 1.106724995     |        |           | -        |
| d__Bacteria.p__Actinobacteriota.c__Coriobacteriia.o__Coriobacteriales.f__Eggerthellaceae.g__Enterorhabdus                                     | 1.1775365       |        |           | -        |
| d__Bacteria.p__Firmicutes.c__Bacilli.o__Erysipelotrichales.f__Erysipelatoclostridiaceae.g__Erysipelotrichaceae_UCG_003                        | 2.001424628     |        |           | -        |
| d__Bacteria.p__Firmicutes.c__Bacilli.o__RF39.f__RF39                                                                                          | 2.411643753     |        |           | -        |
| d__Bacteria.p__Firmicutes.c__Negativicutes.o__Veillonellales.f__Veillonellaceae.g__Veillonellaceae_unclassified                               | 2.077591877     |        |           | -        |
| d__Bacteria.p__Firmicutes.c__Clostridia.o__Lachnospirales.f__Lachnospiraceae.g__Coprococcus                                                   | 2.592525703     |        |           | -        |
| d__Bacteria.p__Proteobacteria.c__Alphaproteobacteria.o__Rhizobiales.f__Beijerinckiaceae                                                       | 1.365086665     |        |           | -        |
| d__Bacteria.p__Firmicutes.c__Clostridia.o__Lachnospirales                                                                                     | 4.55332705      | H      | 4.0956089 | 4.65E-13 |
| d__Bacteria.p__Actinobacteriota.c__Actinobacteria.o__Corynebacteriales.f__Dietziaceae.g__Dietzia                                              | 1.743789648     |        |           | -        |
| d__Bacteria.p__Proteobacteria.c__Gammaproteobacteria.o__Burkholderiales.f__Oxalobacteraceae.g__Massilia                                       | 1.647801971     |        |           | -        |
| d__Bacteria.p__Firmicutes.c__Clostridia.o__Oscillospirales.f__Oscillospiraceae.g__NK4A214_group                                               | 2.068185862     |        |           | -        |
| d__Bacteria.p__Proteobacteria.c__Gammaproteobacteria.o__Xanthomonadales                                                                       | 2.687186776     |        |           | -        |
| d__Bacteria.p__Firmicutes.c__Negativicutes.o__Acidaminococcales.f__Acidaminococcaceae.g__Phascolarctobacterium                                | 2.6064044       |        |           | -        |
| d__Bacteria.p__Actinobacteriota.c__Actinobacteria.o__Corynebacteriales.f__Dietziaceae                                                         | 1.743789648     |        |           | -        |
| d__Bacteria.p__Proteobacteria.c__Gammaproteobacteria.o__Alteromonadales.f__Alteromonadaceae                                                   | 0.280383226     |        |           | -        |

|                                                                                                                                    |             |     |           |  |          |
|------------------------------------------------------------------------------------------------------------------------------------|-------------|-----|-----------|--|----------|
| d__Bacteria.p__Cyanobacteria.c__Cyanobacteriia.o__Cyanobacteriales.f__Chroococciopsaceae.g__Aliterella                             | 0.496336485 |     |           |  | -        |
| d__Bacteria.p__Proteobacteria.c__Gammaproteobacteria.o__Burkholderiales.f__Neisseriaceae.g__Alysiella                              | 2.276428976 | H   | 3.1427728 |  | 1.23E-14 |
| d__Bacteria.p__Fusobacteriota.c__Fusobacteriia.o__Fusobacteriales.f__Leptotrichiaceae.g__Leptotrichiaceae_uncultured               | 2.911655943 |     |           |  | -        |
| d__Bacteria.p__Firmicutes.c__Clostridia.o__Clostridia_vadinBB60_group.f__Clostridia_vadinBB60_group                                | 2.703408075 |     |           |  | -        |
| d__Bacteria.p__Firmicutes.c__Clostridia.o__Lachnospirales.f__Lachnospiraceae.g__Lachnospiraceae_UCG_010                            | 1.543890745 |     |           |  | -        |
| d__Bacteria.p__Firmicutes.c__Clostridia.o__Christensenellales.f__Christensenellaceae.g__Christensenellaceae_R_7_group              | 2.743408963 |     |           |  | -        |
| d__Bacteria.p__Firmicutes.c__Negativicutes.o__Veillonellales.Selenomonadales.f__Selenomonadaceae.g__Selenomonas                    | 3.615846385 | H   | 3.0777342 |  | 0.014263 |
| d__Bacteria.p__Bacteroidota.c__Bacteroidia.o__Bacteroidales.f__Bacteroidales_Bacteroidales_Incertae_Sedis.g__Phocaeicola           | 1.567558086 |     |           |  | -        |
| d__Bacteria.p__Actinobacteriota.c__Actinobacteria.o__Actinomycetales                                                               | 4.765899728 | CC  | 4.3644224 |  | 0.000289 |
| d__Bacteria.p__Bacteroidota.c__Bacteroidia.o__Bacteroidales                                                                        | 5.489378591 | H   | 5.001183  |  | 2.04E-15 |
| d__Bacteria.p__Firmicutes.c__Bacilli.o__Lactobacillales.f__Leuconostocaceae                                                        | 1.23768733  |     |           |  | -        |
| d__Bacteria.p__Firmicutes.c__Bacilli.o__Erysipelotrichales.f__Erysipelatoclostridiaceae.g__Erysipelatoclostridium                  | 0.817187476 |     |           |  | -        |
| d__Bacteria.p__Firmicutes.c__Clostridia.o__Peptostreptococcales_Tissierellales.f__Anaerovoracaceae                                 | 3.566716886 | H   | 3.1229795 |  | 2.70E-12 |
| d__Bacteria.p__Proteobacteria                                                                                                      | 5.493801155 | CCR | 4.8436723 |  | 6.72E-06 |
| d__Bacteria.p__Proteobacteria.c__Gammaproteobacteria.o__Alteromonadales.f__Alteromonadaceae.g__Rheinheimera                        | 0.280383226 |     |           |  | -        |
| d__Bacteria.p__Spirochaetota.c__Spirochaetia.o__Spirochaetales.f__Spirochaetaceae                                                  | 3.454496414 | H   | 3.0121296 |  | 2.39E-14 |
| d__Bacteria.p__Firmicutes.c__Negativicutes.o__Veillonellales.Selenomonadales.f__Selenomonadaceae                                   | 3.771450988 | H   | 3.1898672 |  | 0.001556 |
| d__Bacteria.p__Firmicutes.c__Bacilli.o__Lactobacillales.f__Leuconostocaceae.g__Leuconostoc                                         | 1.23768733  |     |           |  | -        |
| d__Bacteria.p__Firmicutes.c__Bacilli.o__Bacilli_unclassified                                                                       | 2.144017919 |     |           |  | -        |
| d__Bacteria.p__Bacteroidota.c__Bacteroidia.o__SM1A07                                                                               | 1.053627142 |     |           |  | -        |
| d__Bacteria.p__Actinobacteriota.c__Actinobacteria.o__Actinomycetales.f__Actinomycetaceae                                           | 4.765899728 | CC  | 4.3644224 |  | 0.000289 |
| d__Bacteria.p__Firmicutes.c__Clostridia.o__Peptostreptococcales_Tissierellales.f__Peptostreptococcales_Tissierellales.g__W5053     | 1.638988159 |     |           |  | -        |
| d__Bacteria.p__Campilobacterota.c__Campylobacteria.o__Campylobacterales                                                            | 4.013369376 | H   | 3.5601255 |  | 5.89E-16 |
| d__Bacteria.p__Bacteroidota.c__Bacteroidia.o__Flavobacteriales                                                                     | 4.295845807 | H   | 3.6258407 |  | 1.26E-05 |
| d__Bacteria.p__Firmicutes.c__Clostridia.o__Lachnospirales.f__Lachnospiraceae.g__Lachnoanaerobaculum                                | 3.948906995 | H   | 3.3530314 |  | 2.26E-06 |
| d__Bacteria.p__Bacteroidota.c__Bacteroidia.o__SM1A07.f__SM1A07                                                                     | 1.053627142 |     |           |  | -        |
| d__Bacteria.p__Actinobacteriota.c__Actinobacteria.o__Actinomycetales.f__Actinomycetaceae.g__F0332                                  | 3.153735534 |     |           |  | -        |
| d__Bacteria.p__Actinobacteriota.c__Actinobacteria.o__Bifidobacteriales.f__Bifidobacteriaceae.g__Parascardovia                      | 1.487118996 |     |           |  | -        |
| d__Bacteria.p__Firmicutes.c__Bacilli.o__Erysipelotrichales.f__Erysipelotrichaceae.g__Erysipelothrix                                | 0.716460736 |     |           |  | -        |
| d__Bacteria.p__Proteobacteria.c__Gammaproteobacteria.o__Burkholderiales.f__Comamonadaceae.g__Pelomonas                             | 2.028135345 |     |           |  | -        |
| d__Bacteria.p__Proteobacteria.c__Alphaproteobacteria.o__Caulobacteriales.f__Hyphomonadaceae.g__Hyphomonadaceae_uncultured          | 1.758061168 |     |           |  | -        |
| d__Bacteria.p__Proteobacteria.c__Gammaproteobacteria.o__Alteromonadales.f__Idiomarinaceae                                          | 1.75221313  |     |           |  | -        |
| d__Bacteria.p__Firmicutes.c__Negativicutes.o__Veillonellales.Selenomonadales                                                       | 5.108233983 |     |           |  | -        |
| d__Bacteria.p__Firmicutes.c__Clostridia.o__Oscillospirales.f__Oscillospirales_unclassified.g__Oscillospirales_unclassified         | 0           |     |           |  | -        |
| d__Bacteria.p__Proteobacteria.c__Gammaproteobacteria.o__Pseudomonadales.f__Moraxellaceae.g__Acinetobacter                          | 3.070064267 |     |           |  | -        |
| d__Bacteria.p__Bacteroidota.c__Bacteroidia.o__Cytophagales.f__Hymenobacteraceae                                                    | 0.758046333 |     |           |  | -        |
| d__Bacteria.p__Patiscibacteria                                                                                                     | 4.382393637 | H   | 4.0340199 |  | 1.26E-22 |
| d__Bacteria.p__Bacteroidota.c__Bacteroidia.o__Bacteroidales.f__Bacteroidales_unclassified                                          | 1.514547753 |     |           |  | -        |
| d__Bacteria.p__Bacteroidota.c__Bacteroidia.o__Bacteroidales.f__Rikenellaceae.g__Alistipes                                          | 2.833998103 |     |           |  | -        |
| d__Bacteria.p__Desulfobacterota.c__Desulfovibrionia.o__Desulfovibrionales.f__Desulfovibrionaceae.g__Desulfovibrionaceae_uncultured | 2.305765809 |     |           |  | -        |
| d__Bacteria.p__Patiscibacteria.c__Gracilibacteria.o__JGI_0000069_P22                                                               | 1.761175813 |     |           |  | -        |
| d__Bacteria.p__Patiscibacteria.c__Saccharimonadia.o__Saccharimonadales.f__Saccharimonadaceae.g__Saccharimonadaceae_unclassified    | 2.968946349 | H   | 3.0009015 |  | 1.43E-16 |
| d__Bacteria.p__Firmicutes.c__Clostridia.o__Peptococcales.f__Peptococcaceae.g__Peptococcaceae_uncultured                            | 1.509586514 |     |           |  | -        |
| d__Bacteria.p__Firmicutes.c__Bacilli.o__Lactobacillales.f__Streptococcaceae                                                        | 5.40010854  | CCR | 4.9666183 |  | 2.02E-05 |
| d__Bacteria.p__Desulfobacterota.c__Desulfohalobium.o__Desulfohalobiales.f__Desulfohalobaceae                                       | 1.898881825 |     |           |  | -        |
| d__Bacteria.p__Firmicutes.c__Bacilli.o__Acholeplasmatales                                                                          | 2.680995585 |     |           |  | -        |
| d__Bacteria.p__Firmicutes.c__Clostridia.o__Peptostreptococcales_Tissierellales.f__Anaerovoracaceae.g__Eubacterium_bra chy_group    | 2.353091517 | H   | 3.1131384 |  | 1.27E-17 |
| d__Bacteria.p__Actinobacteriota.c__Actinobacteria.o__Propionibacteriales                                                           | 2.3979276   |     |           |  | -        |
| d__Bacteria.p__Proteobacteria.c__Gammaproteobacteria.o__Aeromonadales                                                              | 0.656505134 |     |           |  | -        |
| d__Bacteria.p__Proteobacteria.c__Gammaproteobacteria.o__Burkholderiales.f__Comamonadaceae.g__Comamonas                             | 2.406613165 | H   | 3.0429164 |  | 7.07E-09 |
| d__Bacteria.p__Proteobacteria.c__Gammaproteobacteria.o__Cardiobacteriales.f__Cardiobacteriaceae.g__Suttonella                      | 1.403120521 |     |           |  | -        |
| d__Bacteria.p__Spirochaetota.c__Spirochaetia.o__Spirochaetales.f__Spirochaetaceae.g__Sediminispirochaeta                           | 0.535113202 |     |           |  | -        |
| d__Bacteria.p__Bacteroidota.c__Bacteroidia.o__Bacteroidales.f__Tannerellaceae.g__Tannerella                                        | 3.399532806 |     |           |  | -        |
| d__Bacteria.p__Patiscibacteria.c__Saccharimonadia.o__Saccharimonadales.f__Saccharimonadales                                        | 3.379029544 | H   | 3.0917032 |  | 6.45E-20 |
| d__Bacteria.p__Firmicutes.c__Bacilli.o__Brevibacillales.f__Brevibacillaceae                                                        | 0.599727159 |     |           |  | -        |

|                                                                                                                                          |             |     |           |          |
|------------------------------------------------------------------------------------------------------------------------------------------|-------------|-----|-----------|----------|
| d__Bacteria.p__Proteobacteria.c__Gammaproteobacteria.o__Burkholderiales.f__Rhodocyclaceae                                                | 0.840827657 |     |           | -        |
| d__Bacteria.p__Spirochaetota.c__Spirochaetia.o__Spirochaetales                                                                           | 3.544496414 | H   | 3.0121296 | 2.39E-14 |
| d__Bacteria.p__Firmicutes.c__Bacilli.o__Lactobacillales.f__Lactobacillales_unclassified                                                  | 3.353430755 |     |           | -        |
| d__Bacteria.p__Firmicutes.c__Clostridia.o__Oscillospirales.f__Ruminococcaceae.g__Faecalibacterium                                        | 3.572563771 | H   | 3.2670695 | 3.07E-15 |
| d__Bacteria.p__Firmicutes.c__Bacilli.o__Staphylococcales                                                                                 | 4.746670518 | CCR | 4.4083218 | 0.003483 |
| d__Bacteria.p__Cyanobacteria.c__Vampirivibrionia.o__Gastranaerophilales.f__Gastranaerophilales.g__Gastranaerophilales                    | 1.669715255 |     |           | -        |
| d__Bacteria.p__Firmicutes.c__Bacilli.o__Staphylococcales.f__Gemellaceae                                                                  | 4.746006654 | CCR | 4.4083425 | 0.003238 |
| d__Bacteria.p__Bacteria_unclassified.c__Bacteria_unclassified.o__Bacteria_unclassified.f__Bacteria_unclassified.g__Bacteria_unclassified | 2.987059901 |     |           | -        |
| d__Bacteria.p__Elusimicrobiota.c__Endomicrobia.o__Endomicrobiales.f__Endomicrobiaceae.g__Endomicrobium                                   | 0.525044807 |     |           | -        |
| d__Bacteria.p__Bacteroidota.c__Bacteroidia.o__Sphingobacteriales.f__env_OPS.g__env_OPS                                                   | 1.112568276 |     |           | -        |
| d__Bacteria.p__Bacteroidota.c__Bacteroidia.o__Bacteroidales.f__Marinifilaceae.g__Butyricimonas                                           | 0.482260894 |     |           | -        |
| d__Bacteria.p__Proteobacteria.c__Gammaproteobacteria.o__Burkholderiales.f__Neisseriaceae                                                 | 5.220189931 | H   | 4.3588646 | 6.95E-05 |
| d__Bacteria.p__Deferribacterota.c__Deferribacteres                                                                                       | 2.440335489 |     |           | -        |
| d__Bacteria.p__Spirochaetota.c__Spirochaetia                                                                                             | 3.544496414 | H   | 3.0121296 | 2.39E-14 |
| d__Bacteria.p__Firmicutes.c__Clostridia.o__Peptostreptococcales_Tissierellales                                                           | 4.047860117 | H   | 3.5266817 | 6.30E-12 |
| d__Bacteria.p__Proteobacteria.c__Gammaproteobacteria.o__Aeromonadales.f__Aeromonadaceae                                                  | 0.656505134 |     |           | -        |
| d__Bacteria.p__Deinococcota.c__Deinococci.o__Deinococcales.f__Deinococcaceae                                                             | 1.146128036 |     |           | -        |
| d__Bacteria.p__Firmicutes.c__Clostridia.o__Peptostreptococcales_Tissierellales.f__Peptostreptococcales_Tissierellales.g__Murdochella     | 0.931603144 |     |           | -        |
| d__Bacteria.p__Proteobacteria.c__Gammaproteobacteria.o__Xanthomonadales.f__Xanthomonadaceae.g__Xanthomonadaceae_unclassified             | 2.681414722 |     |           | -        |
| d__Bacteria.p__Firmicutes.c__Bacilli.o__Lactobacillales.f__Aerococcaceae.g__Aerococcus                                                   | 0.674729954 |     |           | -        |
| d__Bacteria.p__Patiscibacteria.c__Saccharimonadia.o__Saccharimonadales.f__Saccharimonadaceae.g__Saccharimonadaceae                       | 2.94044533  |     |           | -        |
| d__Bacteria.p__Proteobacteria.c__Alphaproteobacteria.o__Sphingomonadales.f__Sphingomonadaceae.g__Sphingobium                             | 1.397463809 |     |           | -        |
| d__Bacteria.p__Firmicutes.c__Clostridia.o__Lachnospirales.f__Lachnospiraceae.g__Blautia                                                  | 2.319284561 | H   | 3.4249893 | 1.31E-06 |
| d__Bacteria.p__Firmicutes.c__Clostridia.o__Eubacteriales.f__Eubacteriaceae                                                               | 1.31189894  |     |           | -        |
| d__Bacteria.p__Deinococcota.c__Deinococci.o__Thermales.f__Thermaceae.g__Thermus                                                          | 1.143143182 |     |           | -        |
| d__Bacteria.p__Cyanobacteria.c__Vampirivibrionia.o__Gastranaerophilales                                                                  | 1.669715255 |     |           | -        |
| d__Bacteria.p__Firmicutes.c__Clostridia.o__Eubacteriales                                                                                 | 1.31189894  |     |           | -        |
| d__Bacteria.p__Deinococcota.c__Deinococci.o__Thermales                                                                                   | 1.143143182 |     |           | -        |
| d__Bacteria.p__Actinobacteriota.c__Actinobacteria                                                                                        | 4.968828123 | CC  | 4.4141732 | 0.002257 |
| d__Bacteria.p__Firmicutes.c__Clostridia.o__Oscillospirales.f__Ruminococcaceae.g__Subdoligranulum                                         | 2.562530769 | H   | 3.2101653 | 5.18E-05 |
| d__Bacteria.p__Actinobacteriota.c__Coriobacteria.o__Coriobacteriales.f__Eggerthellaceae.g__Cryptobacterium                               | 1.315670522 |     |           | -        |
| d__Bacteria.p__Firmicutes.c__Clostridia.o__Lachnospirales.f__Lachnospiraceae.g__Lachnoclostridium                                        | 2.4561599   | H   | 3.3168635 | 4.12E-09 |
| d__Bacteria.p__Firmicutes.c__Bacilli.o__Erysipelotrichales.f__Erysipelatoclostridiaceae.g__Asteroleplasma                                | 0.312768399 |     |           | -        |
| d__Bacteria.p__Firmicutes.c__Bacilli.o__Staphylococcales.f__Gemellaceae.g__Gemella                                                       | 4.746006654 | CCR | 4.4083425 | 0.003238 |
| d__Bacteria.p__Firmicutes.c__Clostridia.o__Oscillospirales.f__Ruminococcaceae.g__UBA1819                                                 | 0.643452676 |     |           | -        |
| d__Bacteria.p__Bacteroidota.c__Bacteroidia.o__Sphingobacteriales.f__env_OPS                                                              | 1.112568276 |     |           | -        |
| d__Bacteria.p__Proteobacteria.c__Gammaproteobacteria.o__Pseudomonadales.f__Moraxellaceae.g__Alkanindiges                                 | 1.405255112 |     |           | -        |
| d__Bacteria.p__Deinococcota.c__Deinococci.o__Thermales.f__Thermaceae                                                                     | 1.143143182 |     |           | -        |
| d__Bacteria.p__Firmicutes.c__Clostridia.o__Clostridiales.f__Clostridiaceae.g__Clostridium_sensu_stricto                                  | 1.653488169 |     |           | -        |
| d__Bacteria.p__Proteobacteria.c__Gammaproteobacteria.o__Aeromonadales.f__Aeromonadaceae.g__Aeromonas                                     | 0.656505134 |     |           | -        |
| d__Bacteria.p__Firmicutes.c__Clostridia.o__Peptostreptococcales_Tissierellales.f__Anaerovoracaceae.g__Eubacterium_sap_henum_group        | 2.415080715 |     |           | -        |
| d__Bacteria.p__Proteobacteria.c__Gammaproteobacteria.o__Burkholderiales.f__Oxalobacteraceae                                              | 1.711505949 |     |           | -        |
| d__Bacteria.p__Patiscibacteria.c__Gracilibacteria.o__JGI_0000069_P22.f__JGI_0000069_P22                                                  | 1.761175813 |     |           | -        |
| d__Bacteria.p__Firmicutes.c__Negativicutes.o__Veillonellales_Selenomonadales.f__Selenomonadaceae.g__Mitsuokella                          | 1.486430479 |     |           | -        |
| d__Bacteria.p__Deinococcota.c__Deinococci                                                                                                | 1.445668169 |     |           | -        |
| d__Bacteria.p__Actinobacteriota.c__Actinobacteria.o__Actinobacteria_unclassified                                                         | 3.104482434 |     |           | -        |
| d__Bacteria.p__Proteobacteria.c__Gammaproteobacteria.o__Burkholderiales.f__Sutterellaceae                                                | 2.518401121 | H   | 3.2177397 | 1.71E-10 |
| d__Bacteria.p__Verrucomicrobiota                                                                                                         | 1.840867504 |     |           | -        |
| d__Bacteria.p__Proteobacteria.c__Gammaproteobacteria.o__Enterobacteriales.f__Yersiniaceae                                                | 2.472066545 | H   | 3.0406302 | 4.67E-11 |
| d__Bacteria.p__Verrucomicrobiota.c__Lentisphaeria.o__Victivallales                                                                       | 0.525969822 |     |           | -        |
| d__Bacteria.p__Patiscibacteria.c__Saccharimonadia.o__Saccharimonadales                                                                   | 4.193710024 | H   | 3.8254    | 3.79E-18 |
| d__Bacteria.p__Bacteroidota.c__Bacteroidia.o__Flavobacteriales.f__Flavobacteriaceae.g__Maribacter                                        | 0.475133633 |     |           | -        |
| d__Bacteria.p__Patiscibacteria.c__Gracilibacteria.o__Absconditabacteriales_SR1.f__Absconditabacteriales_SR1.g__Absconditabacteriales_SR1 | 3.897290442 | H   | 3.5922456 | 1.13E-25 |
| d__Bacteria.p__Firmicutes.c__Bacilli.o__Lactobacillales.f__P5D1_392.g__P5D1_392                                                          | 2.970270434 |     |           | -        |
| d__Bacteria.p__Bacteroidota.c__Bacteroidia.o__Bacteroidales.f__Rikenellaceae                                                             | 3.033285862 |     |           | -        |

|                                                                                                                                       |             |     |           |          |
|---------------------------------------------------------------------------------------------------------------------------------------|-------------|-----|-----------|----------|
| d__Bacteria.p__Chloroflexi.c__Anaerolineae.o__Anaerolineales                                                                          | 0.995635195 |     |           | -        |
| d__Bacteria.p__Bacteroidota.c__Bacteroidia.o__Bacteroidales.f__F082                                                                   | 1.190523567 |     |           | -        |
| d__Bacteria.p__Proteobacteria.c__Gammaproteobacteria.o__Pasteurellales.f__Pasteurellaceae.g__Haemophilus                              | 4.94233929  | CCR | 4.5647773 | 7.98E-17 |
| d__Bacteria.p__Firmicutes.c__Bacilli.o__Staphylococcales.f__Staphylococaceae.g__Staphylococcus                                        | 1.938555462 |     |           | -        |
| d__Bacteria.p__Bacteroidota.c__Bacteroidia.o__Bacteroidales.f__Prevotellaceae.g__Prevotella                                           | 5.243155877 | H   | 4.6876665 | 1.51E-08 |
| d__Bacteria.p__Actinobacteriota.c__Coriobacteriia.o__Coriobacteriales.f__Eggerthellaceae.g__DNF00809                                  | 0.817659792 |     |           | -        |
| d__Bacteria.p__Desulfobacterota.c__Desulfobulbia                                                                                      | 1.898881825 |     |           | -        |
| d__Bacteria.p__Proteobacteria.c__Alphaproteobacteria.o__Sphingomonadales.f__Sphingomonadaceae                                         | 3.046915821 |     |           | -        |
| d__Bacteria.p__Firmicutes.c__Bacilli.o__Erysipelotrichales.f__Erysipelotrichaceae.g__Turcibacter                                      | 0.95630567  |     |           | -        |
| d__Bacteria.p__Spirochaetota                                                                                                          | 3.454496414 | H   | 3.0121296 | 2.39E-14 |
| d__Bacteria.p__Firmicutes.c__Bacilli.o__Lactobacillales.f__Carnobacteriaceae.g__Dolosigranulum                                        | 0.86332286  |     |           | -        |
| d__Bacteria.p__Actinobacteriota.c__Actinobacteria.o__Micrococcales.f__Microbacteriaceae.g__Microbacteriaceae_unclassified             | 0           |     |           | -        |
| d__Bacteria.p__Cyanobacteria.c__Vampirivibrionia                                                                                      | 1.669715255 |     |           | -        |
| d__Bacteria.p__Proteobacteria.c__Gammaproteobacteria.o__Burkholderiales.f__Rhodocyclaceae.g__Dechloromonas                            | 0.145277312 |     |           | -        |
| d__Bacteria.p__Desulfobacterota.c__Desulfovibrionia.o__Desulfovibrionales.f__Desulfovibrionaceae.g__Mailhella                         | 1.054995862 |     |           | -        |
| d__Bacteria.p__Elusimicrobiota.c__Endomicrobia                                                                                        | 0.525044807 |     |           | -        |
| d__Bacteria.p__Proteobacteria.c__Gammaproteobacteria.o__Pasteurellales                                                                | 4.958275987 | CCR | 4.5774901 | 1.11E-17 |
| d__Bacteria.p__Actinobacteriota.c__Actinobacteria.o__Propionibacteriales.f__Propionibacteriaceae.g__Propionibacterium                 | 2.095567832 |     |           | -        |
| d__Bacteria.p__Firmicutes.c__Clostridia.o__Oscillospirales.f__Ruminococcaceae.g__Anaerotruncus                                        | 1.549966124 |     |           | -        |
| d__Bacteria.p__Bacteroidota.c__Bacteroidia.o__Bacteroidales.f__Prevotellaceae.g__Paraprevotella                                       | 1.380986076 |     |           | -        |
| d__Bacteria.p__Bacteroidota.c__Bacteroidia                                                                                            | 5.516826855 | H   | 5.0122127 | 2.75E-16 |
| d__Bacteria.p__Firmicutes.c__Firmicutes_unclassified.o__Firmicutes_unclassified.f__Firmicutes_unclassified.g__Firmicutes_unclassified | 1.440520915 |     |           | -        |
| d__Bacteria.p__Bacteroidota.c__Bacteroidia.o__Bacteroidales.f__Barnesiellaceae                                                        | 1.765668555 |     |           | -        |
| d__Bacteria.p__Bacteria_unclassified.c__Bacteria_unclassified                                                                         | 2.987059901 |     |           | -        |
| d__Bacteria.p__Actinobacteriota.c__Coriobacteriia                                                                                     | 3.450941579 | H   | 3.0843799 | 9.54E-10 |
| d__Bacteria.p__Firmicutes.c__Syntrophomonadia.o__Syntrophomonadales.f__Syntrophomonadaceae.g__Pelospora                               | 0.557163342 |     |           | -        |
| d__Bacteria.p__Proteobacteria.c__Alphaproteobacteria.o__Rhizobiales.f__Rhizobiaceae.g__Rhizobiaceae_unclassified                      | 2.551383147 | CC  | 3.3253052 | 3.89E-22 |
| d__Bacteria.p__Proteobacteria.c__Gammaproteobacteria.o__Xanthomonadales.f__Xanthomonadaceae.g__Xanthomonas                            | 0.698970004 |     |           | -        |
| d__Bacteria.p__Desulfobacterota.c__Desulfovibrionia.o__Desulfovibrionales.f__Desulfovibrionaceae.g__Bilophila                         | 1.365487985 |     |           | -        |
| d__Bacteria.p__Firmicutes.c__Negativicutes.o__Veillonellales.f__Selenomonadales.f__Selenomonadaceae.g__Selenomonadaceae_unclassified  | 2.998757383 |     |           | -        |
| d__Bacteria.p__Firmicutes.c__Bacilli.o__Erysipelotrichales.f__Erysipelatoclostridiaceae                                               | 2.102016952 | H   | 3.5323375 | 4.30E-08 |
| d__Bacteria.p__Proteobacteria.c__Gammaproteobacteria.o__Burkholderiales.f__Alcaligenaceae.g__Achromobacter                            | 2.334080189 | H   | 3.427058  | 1.38E-24 |
| d__Bacteria.p__Bacteroidota.c__Bacteroidia.o__Flavobacteriales.f__Weeksellaceae.g__Chryseobacterium                                   | 2.24723655  |     |           | -        |
| d__Bacteria.p__Firmicutes.c__Negativicutes.o__Acidaminococcales                                                                       | 2.6064044   |     |           | -        |
| d__Bacteria.p__Firmicutes.c__Clostridia.o__Lachnospirales.f__Lachnospiraceae.g__Oribacterium                                          | 3.66107201  | H   | 3.0435608 | 2.63E-07 |
| d__Bacteria.p__Fusobacteriota.c__Fusobacteriia.o__Fusobacteriales.f__Fusobacteriaceae                                                 | 4.820212394 | H   | 4.2671497 | 1.39E-14 |
| d__Bacteria.p__Bacteroidota.c__Bacteroidia.o__Cytophagales.f__Spirosomaceae                                                           | 0.62838893  |     |           | -        |
| d__Bacteria.p__Firmicutes.c__Clostridia.o__Lachnospirales.f__Lachnospiraceae.g__Marvinbryantia                                        | 0.929053819 |     |           | -        |
| d__Bacteria.p__Proteobacteria.c__Gammaproteobacteria.o__Burkholderiales.f__Burkholderiaceae.g__Lautropia                              | 4.749665657 | CCR | 4.4361199 | 1.96E-10 |
| d__Bacteria.p__Proteobacteria.c__Gammaproteobacteria.o__Burkholderiales.f__Methylophilaceae.g__Methylophilus                          | 0.625227856 |     |           | -        |
| d__Bacteria.p__Proteobacteria.c__Gammaproteobacteria.o__Enterobacteriales.f__Enterobacteriaceae.g__Enterobacteriaceae_unclassified    | 2.028513157 |     |           | -        |
| d__Bacteria.p__Actinobacteriota.c__Actinobacteria.o__Corynebacteriales.f__Nocardiaceae.g__Rhodococcus                                 | 3.33472223  | H   | 3.0545437 | 6.09E-10 |
| d__Bacteria.p__Desulfobacterota.c__Desulfobulbia.o__Desulfobulbales.f__Desulfobulbaceae.g__Desulfobulbus                              | 1.898881825 |     |           | -        |
| d__Bacteria.p__Campilobacterota.c__Campylobacteriia.o__Campylobacteriales.f__Helicobacteraceae.g__Helicobacter                        | 2.697484662 |     |           | -        |
| d__Bacteria.p__Firmicutes.c__Bacilli.o__Bacillales.f__Bacillaceae.g__Geobacillus                                                      | 1.207018511 |     |           | -        |
| d__Bacteria.p__Proteobacteria.c__Alphaproteobacteria.o__Sphingomonadales.f__Sphingomonadaceae.g__Sphingomonas                         | 3.038969115 |     |           | -        |
| d__Bacteria.p__Bacteroidota.c__Bacteroidia.o__Bacteroidales.f__Tannerellaceae                                                         | 3.455233266 |     |           | -        |
| d__Bacteria.p__Proteobacteria.c__Alphaproteobacteria.o__Caulobacteriales.f__Hyphomonadaceae                                           | 1.758061168 |     |           | -        |
| d__Bacteria.p__Actinobacteriota.c__Actinobacteria.o__Corynebacteriales.f__Corynebacteriaceae                                          | 3.448795731 |     |           | -        |
| d__Bacteria.p__Actinobacteriota.c__Actinobacteria.o__Micrococcales.f__Micrococcales_unclassified                                      | 2.000950837 |     |           | -        |
| d__Bacteria.p__Firmicutes.c__Bacilli.o__Acholeplasmatales.f__Acholeplasmataceae.g__Acholeplasma                                       | 2.680995585 |     |           | -        |
| d__Bacteria.p__Synergistota.c__Synergistia.o__Synergistales                                                                           | 2.720501877 |     |           | -        |
| d__Bacteria.p__Firmicutes.c__Clostridia.o__Oscillospirales.f__Butyricocccaceae.g__UCG_009                                             | 1.373043428 |     |           | -        |
| d__Bacteria.p__Bacteroidota                                                                                                           | 5.516826855 | H   | 5.0122127 | 2.75E-16 |
| d__Bacteria.p__Bacteroidota.c__Bacteroidia.o__Bacteroidales.f__Porphyromonadaceae.g__Porphyromonas                                    | 4.697542617 | H   | 4.184499  | 1.20E-15 |
| d__Bacteria.p__Firmicutes.c__Clostridia.o__Lachnospirales.f__Lachnospiraceae.g__Anaerostipes                                          | 2.265036938 |     |           | -        |

|                                                                                                                                                 |             |    |           |          |
|-------------------------------------------------------------------------------------------------------------------------------------------------|-------------|----|-----------|----------|
| d__Bacteria.p__Firmicutes.c__Bacilli.o__Acholeplasmatales.f__Acholeplasmataceae                                                                 | 2.680995585 |    |           | -        |
| d__Bacteria.p__Proteobacteria.c__Gammaproteobacteria.o__Pseudomonadales.f__Moraxellaceae.g__Psychrobacter                                       | 0.166060918 |    |           | -        |
| d__Bacteria.p__Chloroflexi.c__Anaerolineae.o__Anaerolineales.f__Anaerolineaceae                                                                 | 0.995635195 |    |           | -        |
| d__Bacteria.p__Proteobacteria.c__Gammaproteobacteria.o__Burkholderiales.f__Nitrosomonadaceae.g__DSSD61                                          | 0           |    |           | -        |
| d__Bacteria.p__Firmicutes.c__Bacilli.o__Brevibacillales                                                                                         | 0.599727159 |    |           | -        |
| d__Bacteria.p__Bacteroidota.c__Bacteroidia.o__Bacteroidales.f__Prevotellaceae.g__Alloprevotella                                                 | 4.825864411 | H  | 4.5044025 | 2.16E-35 |
| d__Bacteria.p__Actinobacteriota.c__Coriobacteriia.o__Coriobacteriales.f__Eggerthellaceae.g__Slackia                                             | 1.284269556 |    |           | -        |
| d__Bacteria.p__Actinobacteriota.c__Actinobacteria.o__Micrococcales.f__Microbacteriaceae                                                         | 0           |    |           | -        |
| d__Bacteria.p__Firmicutes.c__Clostridia.o__Oscillospirales.f__Ruminococcaceae.g__Eubacterium_siraeum_group                                      | 2.33990603  |    |           | -        |
| d__Bacteria.p__Firmicutes.c__Bacilli.o__Mycoplasmatales.f__Mycoplasmataceae.g__Mycoplasma                                                       | 2.727285578 |    |           | -        |
| d__Bacteria.p__Firmicutes.c__Clostridia.o__Lachnospirales.f__Lachnospiraceae.g__Johnsonella                                                     | 3.122211196 |    |           | -        |
| d__Bacteria.p__Firmicutes.c__Clostridia.o__Lachnospirales.f__Lachnospiraceae.g__Ruminococcus_torques_group                                      | 2.120432904 |    |           | -        |
| d__Bacteria.p__Synergistota.c__Synergistia.o__Synergistales.f__Synergistaceae                                                                   | 2.720501877 |    |           | -        |
| d__Bacteria.p__Desulfobacterota.c__Desulfovibrionia.o__Desulfovibrionales.f__Desulfovibrionaceae                                                | 2.505382574 |    |           | -        |
| d__Bacteria.p__Proteobacteria.c__Alphaproteobacteria.o__Caulobacteriales.f__Caulobacteraceae.g__Brevundimonas                                   | 1.796921075 |    |           | -        |
| d__Bacteria.p__Firmicutes.c__Firmicutes_unclassified                                                                                            | 1.440520915 |    |           | -        |
| d__Bacteria.p__Firmicutes.c__Clostridia.o__Oscillospirales.f__UCG_010                                                                           | 1.749901877 |    |           | -        |
| d__Bacteria.p__Campilobacterota.c__Campylobacteria.o__Campylobacterales.f__Helicobacteraceae.g__Wolinella                                       | 1.346352974 |    |           | -        |
| d__Bacteria.p__Proteobacteria.c__Gammaproteobacteria.o__Burkholderiales.f__Oxalobacteraceae.g__Janthinobacterium                                | 0.846425482 |    |           | -        |
| d__Bacteria.p__Actinobacteriota.c__Actinobacteria.o__Propionibacteriales.f__Propionibacteriaceae.g__Pseudopropionibacterium                     | 1.827307719 |    |           | -        |
| d__Bacteria.p__Synergistota                                                                                                                     | 2.720501877 |    |           | -        |
| d__Bacteria.p__Firmicutes.c__Clostridia.o__Lachnospirales.f__Lachnospiraceae.g__Lachnospiraceae_ND3007_group                                    | 2.334353208 | H  | 3.3508166 | 1.45E-11 |
| d__Bacteria.p__Actinobacteriota.c__Actinobacteria.o__Frankiales                                                                                 | 0.890899844 |    |           | -        |
| d__Bacteria.p__Fusobacteriota.c__Fusobacteriia.o__Fusobacteriales.f__Leptotrichiaceae                                                           | 5.038809375 | CC | 4.5267539 | 0.004177 |
| d__Bacteria.p__Desulfobacterota.c__Desulfovibrionia.o__Desulfovibrionales.f__Desulfomicrobiaceae                                                | 0.955275315 |    |           | -        |
| d__Bacteria.p__Proteobacteria.c__Gammaproteobacteria.o__Enterobacteriales.f__Enterobacteriaceae.g__Escherichia_Shigella                         | 2.295252849 | H  | 3.2378861 | 3.11E-07 |
| d__Bacteria.p__Bacteroidota.c__Bacteroidia.o__Flavobacteriales.f__Flavobacteriaceae.g__Capnocytophaga                                           | 4.251371549 | H  | 3.541349  | 0.000126 |
| d__Bacteria.p__Firmicutes.c__Clostridia.o__Peptostreptococcales_Tissierellales.f__Anaerovoracaceae.g__Anaerovoracaceae_Family_XIII_AD3011_group | 0.768743782 |    |           | -        |
| d__Bacteria.p__Bacteroidota.c__Bacteroidia.o__Sphingobacteriales.f__Sphingobacteriales_unclassified.g__Sphingobacteriales_unclassified          | 0.770852012 |    |           | -        |
| d__Bacteria.p__Proteobacteria.c__Gammaproteobacteria.o__Pseudomonadales                                                                         | 4.208881494 | H  | 3.9041018 | 1.01E-28 |
| d__Bacteria.p__Firmicutes.c__Negativicutes.o__Veillonellales_Selenomonadales.f__Selenomonadaceae.g__Megamonas                                   | 2.85942996  | H  | 3.1149896 | 3.66E-12 |
| d__Bacteria.p__Synergistota.c__Synergistia                                                                                                      | 2.720501877 |    |           | -        |
| d__Bacteria.p__Proteobacteria.c__Gammaproteobacteria.o__Pasteurellales.f__Pasteurellaceae.g__Pasteurellaceae_unclassified                       | 2.617250036 |    |           | -        |
| d__Bacteria.p__Actinobacteriota.c__Coriobacteriia.o__Coriobacteriales.f__Eggerthellaceae                                                        | 1.743789648 |    |           | -        |
| d__Bacteria.p__Firmicutes.c__Clostridia.o__Peptostreptococcales_Tissierellales.f__Peptostreptococcaceae.g__Intestinibacter                      | 1.235348055 |    |           | -        |
| d__Bacteria.p__Chloroflexi                                                                                                                      | 0.995635195 |    |           | -        |
| d__Bacteria.p__Firmicutes.c__Bacilli.o__Erysipelotrichales.f__Erysipelatoclostridiaceae.g__UCG_004                                              | 1.054182649 |    |           | -        |
| d__Bacteria.p__Deferribacterota                                                                                                                 | 2.440335489 |    |           | -        |
| d__Bacteria.p__Bacteroidota.c__Bacteroidia.o__Bacteroidia_unclassified.f__Bacteroidia_unclassified                                              | 0.534207478 |    |           | -        |
| d__Bacteria.p__Bacteria_unclassified.c__Bacteria_unclassified.o__Bacteria_unclassified                                                          | 2.987059901 |    |           | -        |
| d__Bacteria.p__Firmicutes.c__Bacilli.o__Erysipelotrichales.f__Erysipelatoclostridiaceae.g__Erysipelatoclostridiaceae                            | 0.262111193 |    |           | -        |
| d__Bacteria.p__Firmicutes.c__Clostridia.o__Peptococcales                                                                                        | 2.582014636 | H  | 3.5545261 | 1.64E-21 |
| d__Bacteria.p__Actinobacteriota.c__Actinobacteria.o__Bifidobacteriales.f__Bifidobacteriaceae.g__Alloscardovia                                   | 1.760584021 |    |           | -        |
| d__Bacteria.p__Patiscibacteria.c__Saccharimonadia.o__Saccharimonadales.f__Saccharimonadales_unclassified                                        | 1.306169635 |    |           | -        |
| d__Bacteria.p__Firmicutes.c__Clostridia.o__Clostridia_unclassified.f__Clostridia_unclassified.g__Clostridia_unclassified                        | 0.02413368  |    |           | -        |
| d__Bacteria.p__Firmicutes.c__Clostridia.o__Oscillospirales.f__Oscillospiraceae.g__Oscillibacter                                                 | 2.239978371 |    |           | -        |
| d__Bacteria.p__Bacteroidota.c__Bacteroidia.o__Bacteroidales.f__Porphyromonadaceae                                                               | 4.697542617 | H  | 4.184499  | 1.20E-15 |
| d__Bacteria.p__Bacteroidota.c__Bacteroidia.o__Flavobacteriales.f__Flavobacteriaceae                                                             | 4.251511163 | H  | 3.5415481 | 0.000127 |
| d__Bacteria.p__Firmicutes.c__Clostridia.o__Peptostreptococcales_Tissierellales.f__Peptostreptococcaceae.g__Peptoanaerobacter                    | 1.771797386 |    |           | -        |
| d__Bacteria.p__Bacteroidota.c__Bacteroidia.o__Bacteroidales.f__Prevotellaceae.g__Prevotellaceae                                                 | 0.811479251 |    |           | -        |
| d__Bacteria.p__Firmicutes.c__Negativicutes.o__Veillonellales_Selenomonadales.f__Veillonellaceae.g__Veillonella                                  | 5.082901734 |    |           | -        |
| d__Bacteria.p__Deinococota                                                                                                                      | 1.445668169 |    |           | -        |
| d__Bacteria.p__Proteobacteria.c__Alphaproteobacteria.o__Rhizobiales.f__Beijerinckiaceae.g__Methylobacterium_Methylorubrum                       | 1.365086665 |    |           | -        |
| d__Bacteria.p__Firmicutes.c__Bacilli.o__Izomoplasmatales.f__Izomoplasmatales.g__Izomoplasmatales                                                | 1.43513877  |    |           | -        |
| d__Bacteria.p__Elusimicrobiota.c__Elusimicrobia.o__Lineage_IV                                                                                   | 0.299476168 |    |           | -        |



|                                                                                                                                     |             |     |           |          |
|-------------------------------------------------------------------------------------------------------------------------------------|-------------|-----|-----------|----------|
| d__Bacteria.p__Proteobacteria.c__Gammaproteobacteria.o__Burkholderiales.f__Rhodocyclaceae.g__Methyloversatilis                      | 0.504033061 |     |           | -        |
| d__Bacteria.p__Desulfobacterota                                                                                                     | 2.61110852  | H   | 3.1929453 | 6.18E-14 |
| d__Bacteria.p__Bacteroidota.c__Bacteroidia.o__Flavobacteriales.f__Weeksellaceae.g__Moheibacter                                      | 1.268343914 |     |           | -        |
| d__Bacteria.p__Firmicutes.c__Bacilli.o__Lactobacillales.f__Enterococcaceae.g__Enterococcus                                          | 1.174433645 |     |           | -        |
| d__Bacteria.p__Firmicutes.c__Clostridia.o__Oscillospirales.f__Oscillospiraceae.g__UCG_002                                           | 2.630217142 | H   | 3.0339927 | 3.90E-11 |
| d__Bacteria.p__Firmicutes.c__Clostridia.o__Oscillospirales.f__Oscillospiraceae.g__UCG_003                                           | 1.945995834 |     |           | -        |
| d__Bacteria.p__Firmicutes.c__Clostridia.o__Oscillospirales.f__Eubacterium__coprostanoligenes_group                                  | 2.576908738 |     |           | -        |
| d__Bacteria.p__Bacteroidota.c__Bacteroidia.o__Bacteroidales.f__Paludibacteraceae                                                    | 2.876106448 |     |           | -        |
| d__Bacteria.p__Bacteroidota.c__Bacteroidia.o__Bacteroidales.f__Tannerellaceae.g__Parabacteroides                                    | 2.535755121 | H   | 3.191488  | 1.23E-08 |
| d__Bacteria.p__Proteobacteria.c__Alphaproteobacteria.o__Rickettsiales.f__Mitochondria                                               | 1.871556943 |     |           | -        |
| d__Bacteria.p__Firmicutes.c__Clostridia.o__Oscillospirales.f__Ruminococcaceae.g__CAG_352                                            | 1.960742509 |     |           | -        |
| d__Bacteria.p__Firmicutes.c__Bacilli.o__Erysipelotrichales.f__Erysipelatoclostridiaceae.g__Catenibacterium                          | 0.632221477 |     |           | -        |
| d__Bacteria.p__Proteobacteria.c__Gammaproteobacteria.o__Burkholderiales.f__Comamonadaceae.g__Schlegelella                           | 1.017490732 |     |           | -        |
| d__Bacteria.p__Firmicutes.c__Clostridia.o__Eubacteriales.f__Eubacteriaceae.g__Pseudoramibacter                                      | 1.31189894  |     |           | -        |
| d__Bacteria.p__Actinobacteriota.c__Actinobacteria.o__Propionibacteriales.f__Propionibacteriaceae                                    | 2.3979276   |     |           | -        |
| d__Bacteria.p__Firmicutes.c__Clostridia.o__Oscillospirales.f__Ruminococcaceae                                                       | 3.706035882 | H   | 3.3878086 | 5.52E-15 |
| d__Bacteria.p__Bacteroidota.c__Bacteroidia.o__Flavobacteriales.f__Weeksellaceae.g__Chishuiella                                      | 1.321332074 |     |           | -        |
| d__Bacteria.p__Proteobacteria.c__Alphaproteobacteria.o__Rhizobiales.f__Devosiaceae.g__Devosia                                       | 0.572839787 |     |           | -        |
| d__Bacteria.p__Actinobacteriota                                                                                                     | 4.980846659 | CC  | 4.4136167 | 0.00214  |
| d__Bacteria.p__Proteobacteria.c__Alphaproteobacteria.o__Sphingomonadales                                                            | 3.046915821 |     |           | -        |
| d__Bacteria.p__Firmicutes.c__Clostridia.o__Oscillospirales.f__Oscillospiraceae.g__Oscillospiraceae_uncultured                       | 2.404772647 |     |           | -        |
| d__Bacteria.p__Bacteroidota.c__Bacteroidia.o__SM1A07.f__SM1A07.g__SM1A07                                                            | 1.053627142 |     |           | -        |
| d__Bacteria.p__Firmicutes.c__Clostridia.o__Peptostreptococcales_Tissierellales.f__Peptostreptococcaceae.g__Eubacterium__yurii_group | 2.308030554 |     |           | -        |
| d__Bacteria.p__Firmicutes.c__Clostridia.o__Clostridiales.f__Clostridiaceae.g__Clostridiaceae_unclassified                           | 0.51568465  |     |           | -        |
| d__Bacteria.p__Proteobacteria.c__Gammaproteobacteria.o__Burkholderiales.f__Sutterellaceae.g__Parasutterella                         | 2.259815645 | H   | 3.4690302 | 3.30E-10 |
| d__Bacteria.p__Firmicutes.c__Clostridia.o__Lachnospirales.f__Lachnospiraceae.g__Stomatobaculum                                      | 3.607682451 | H   | 3.1690664 | 6.34E-06 |
| d__Bacteria.p__Bacteroidota.c__Bacteroidia.o__Flavobacteriales.f__Weeksellaceae                                                     | 3.282825959 |     |           | -        |
| d__Bacteria.p__Proteobacteria.c__Alphaproteobacteria.o__Rhodospirillales                                                            | 2.241848759 |     |           | -        |
| d__Bacteria.p__Campilobacterota.c__Campylobacteria.o__Campylobacterales.f__Campylobacteraceae                                       | 3.990877424 | H   | 3.5327816 | 1.88E-15 |
| d__Bacteria.p__Proteobacteria.c__Gammaproteobacteria.o__Cardiobacteriales                                                           | 3.215095978 | CCR | 3.2642372 | 1.33E-07 |
| d__Bacteria.p__Firmicutes.c__Clostridia.o__Oscillospirales.f__Butyricoccaceae.g__Butyricoccus                                       | 1.651762447 |     |           | -        |
| d__Bacteria.p__Firmicutes.c__Bacilli.o__Erysipelotrichales                                                                          | 3.612668837 | H   | 3.1995754 | 8.31E-15 |
| d__Bacteria.p__Firmicutes.c__Bacilli.o__Erysipelotrichales.f__Erysipelotrichaceae.g__Erysipelotrichaceae_UCG_006                    | 1.312509813 |     |           | -        |
| d__Bacteria.p__Proteobacteria.c__Gammaproteobacteria.o__Pasteurellales.f__Pasteurellaceae.g__Aggregatibacter                        | 3.611780947 | H   | 3.2744165 | 8.46E-26 |
| d__Bacteria.p__Proteobacteria.c__Alphaproteobacteria.o__Rhodobacterales.f__Rhodobacteraceae.g__Rubellimicrobium                     | 0.579783597 |     |           | -        |
| d__Bacteria.p__Firmicutes.c__Bacilli.o__Lactobacillales.f__Aerococcaceae.g__Abiotrophia                                             | 3.627712023 | CCR | 3.2680241 | 0.022617 |
| d__Bacteria.p__Proteobacteria.c__Gammaproteobacteria.o__Burkholderiales.f__Burkholderiaceae.g__Ralstonia                            | 0.748741621 |     |           | -        |
| d__Bacteria.p__Proteobacteria.c__Alphaproteobacteria.o__Rhodobacterales.f__Rhodobacteraceae                                         | 1.246920431 |     |           | -        |
| d__Bacteria.p__Planctomycetota.c__Planctomycetes.o__Pirellulales.f__Pirellulaceae.g__Rhodopirellula                                 | 0.198264238 |     |           | -        |
| d__Bacteria.p__Firmicutes.c__Clostridia.o__Lachnospirales.f__Lachnospiraceae.g__A2                                                  | 2.099951806 |     |           | -        |
| d__Bacteria.p__Fusobacteriota.c__Fusobacteriia.o__Fusobacteriales.f__Fusobacteriaceae.g__Fusobacterium                              | 4.820212394 | H   | 4.2671497 | 1.39E-14 |
| d__Bacteria.p__Deinococota.c__Deinococci.o__Deinococcales                                                                           | 1.146128036 |     |           | -        |
| d__Bacteria.p__Patescibacteria.c__Gracilibacteria                                                                                   | 3.929411992 | H   | 3.6225662 | 3.48E-26 |
| d__Bacteria.p__Campilobacterota.c__Campylobacteria                                                                                  | 4.013369376 | H   | 3.5601255 | 5.89E-16 |
| d__Bacteria.p__Firmicutes.c__Bacilli.o__Paenibacillales                                                                             | 0.750518962 |     |           | -        |
| d__Bacteria.p__Firmicutes.c__Clostridia.o__Lachnospirales.f__Lachnospiraceae.g__Fusicatenibacter                                    | 3.237349813 | H   | 3.0364156 | 2.17E-18 |
| d__Bacteria.p__Actinobacteriota.c__Coriobacteriia.o__Coriobacteriales.f__Atopobiaceae                                               | 3.438785251 | H   | 3.0765696 | 4.73E-09 |
| d__Bacteria.p__Firmicutes.c__Clostridia.o__Oscillospirales.f__Oscillospirales_unclassified                                          | 0           |     |           | -        |
| d__Bacteria.p__Bacteroidota.c__Bacteroidia.o__Bacteroidales.f__Prevotellaceae                                                       | 5.385730659 | H   | 4.8948212 | 9.12E-13 |
| d__Bacteria.p__Actinobacteriota.c__Actinobacteria.o__Bifidobacteriales.f__Bifidobacteriaceae                                        | 3.088599258 |     |           | -        |
| d__Bacteria.p__Firmicutes.c__Bacilli.o__Bacilli_unclassified.f__Bacilli_unclassified                                                | 2.144017919 |     |           | -        |
| d__Bacteria.p__Proteobacteria.c__Gammaproteobacteria.o__Burkholderiales.f__Comamonadaceae.g__Delftia                                | 1.397940009 |     |           | -        |
| d__Bacteria.p__Bacteroidota.c__Bacteroidia.o__Flavobacteriales.f__Weeksellaceae.g__Bergeyella                                       | 3.230881176 |     |           | -        |
| d__Bacteria.p__Firmicutes.c__Bacilli.o__Lactobacillales                                                                             | 5.438022874 | CCR | 4.9951329 | 5.51E-06 |
| d__Bacteria.p__Planctomycetota                                                                                                      | 0.516629796 |     |           | -        |
| d__Bacteria.p__Desulfobacterota.c__Desulfovibrionia                                                                                 | 2.517450403 |     |           | -        |
| d__Bacteria.p__Firmicutes.c__Clostridia.o__Clostridia_vadinBB60_group                                                               | 2.703408075 |     |           | -        |

|                                                                                                                                               |             |     |           |          |
|-----------------------------------------------------------------------------------------------------------------------------------------------|-------------|-----|-----------|----------|
| d__Bacteria.p__Actinobacteriota.c__Actinobacteria.o__Actinomycetales.f__Actinomycetaceae.g__Actinomycetaceae_unclassified                     | 2.013875655 |     |           | -        |
| d__Bacteria.p__Campilobacterota.c__Campylobacteria.o__Campylobacterales.f__Helicobacteraceae                                                  | 2.716414774 |     |           | -        |
| d__Bacteria.p__Proteobacteria.c__Gammaproteobacteria.o__Pasteurellales.f__Pasteurellaceae                                                     | 4.958275987 | CCR | 4.5774901 | 1.11E-17 |
| d__Bacteria.p__Proteobacteria.c__Gammaproteobacteria.o__Enterobacterales.f__Yersiniaceae.g__Serratia                                          | 2.472066545 | H   | 3.1030001 | 4.67E-11 |
| d__Bacteria.p__Actinobacteriota.c__Actinobacteria.o__Bifidobacteriales.f__Bifidobacteriaceae.g__Gardnerella                                   | 0.513254097 |     |           | -        |
| d__Bacteria.p__Firmicutes.c__Firmicutes_unclassified.o__Firmicutes_unclassified.f__Firmicutes_unclassified                                    | 1.440520915 |     |           | -        |
| d__Bacteria.p__Firmicutes.c__Clostridia.o__Oscillospirales.f__Eubacterium_coprostanoligenes_group.g__Eubacterium_coprostanoligenes_group      | 2.576908738 |     |           | -        |
| d__Bacteria.p__Desulfobacterota.c__Desulfobulbia.o__Desulfobulbales                                                                           | 1.898881825 |     |           | -        |
| d__Bacteria.p__Firmicutes.c__Clostridia.o__Lachnospirales.f__Lachnospiraceae.g__Tuzzerella                                                    | 1.345233658 |     |           | -        |
| d__Bacteria.p__Patiscibacteria.c__Saccharimonadia                                                                                             | 4.193710024 | H   | 3.8254    | 3.79E-18 |
| d__Bacteria.p__Actinobacteriota.c__Actinobacteria.o__Corynebacteriales.f__Corynebacteriaceae.g__Corynebacterium                               | 3.436623741 |     |           | -        |
| d__Bacteria.p__Actinobacteriota.c__Actinobacteria.o__Bifidobacteriales                                                                        | 3.088599258 |     |           | -        |
| d__Bacteria.p__Bacteroidota.c__Bacteroidia.o__Bacteroidia_unclassified.f__Bacteroidia_unclassified.g__Bacteroidia_unclassified                | 0.534207478 |     |           | -        |
| d__Bacteria.p__Elusimicrobiota.c__Elusimicrobia                                                                                               | 0.299476168 |     |           | -        |
| d__Bacteria.p__Firmicutes.c__Clostridia.o__Oscillospirales.f__Ruminococcaceae.g__Negativibacillus                                             | 1.589311168 |     |           | -        |
| d__Bacteria.p__Firmicutes.c__Bacilli.o__Erysipelotrichales.f__Erysipelotrichaceae                                                             | 3.599056878 | H   | 3.180894  | 4.67E-14 |
| d__Bacteria.p__Actinobacteriota.c__Coriobacteriia.o__Coriobacteriales.f__Coriobacteriaceae.g__Collinsella                                     | 1.352733653 |     |           | -        |
| d__Bacteria.p__Fusobacteriota                                                                                                                 | 5.147631904 |     |           | -        |
| d__Bacteria.p__Proteobacteria.c__Alphaproteobacteria.o__Caulobacterales.f__Caulobacteraceae.g__Asticcacaulis                                  | 0.798354636 |     |           | -        |
| d__Bacteria.p__Firmicutes.c__Clostridia.o__Oscillospirales.f__UCG_010.g__UCG_010                                                              | 1.749901877 |     |           | -        |
| d__Bacteria.p__Firmicutes.c__Bacilli.o__Erysipelotrichales.f__Erysipelotrichaceae.g__Holdemania                                               | 0.713010262 |     |           | -        |
| d__Bacteria.p__Firmicutes.c__Bacilli.o__RF39                                                                                                  | 2.411643753 |     |           | -        |
| d__Bacteria.p__Elusimicrobiota.c__Endomicrobia.o__Endomicrobiales                                                                             | 0.525044807 |     |           | -        |
| d__Bacteria.p__Proteobacteria.c__Alphaproteobacteria.o__Rhodospirillales.f__Rhodospirillales_uncultured.g__Rhodospirillales_uncultured        | 2.241848759 |     |           | -        |
| d__Bacteria.p__Proteobacteria.c__Gammaproteobacteria.o__Pseudomonadales.f__Pseudomonadaceae                                                   | 3.716747211 | H   | 3.4198539 | 7.11E-29 |
| d__Bacteria.p__Bacteroidota.c__Bacteroidia.o__Cytophagales.f__Spirosomaceae.g__Spirosoma                                                      | 0.62838893  |     |           | -        |
| d__Bacteria.p__Proteobacteria.c__Alphaproteobacteria.o__Sphingomonadales.f__Sphingomonadaceae.g__Novosphingobium                              | 2.095002072 |     |           | -        |
| d__Bacteria.p__Bacteroidota.c__Bacteroidia.o__Bacteroidales.f__Rikenellaceae.g__Rikenella                                                     | 1.640268426 |     |           | -        |
| d__Bacteria.p__Firmicutes.c__Bacilli.o__Lactobacillales.f__Lactobacillales_unclassified.g__Lactobacillales_unclassified                       | 3.353430755 |     |           | -        |
| d__Bacteria.p__Firmicutes.c__Bacilli.o__Lactobacillales.f__Streptococcaceae.g__Streptococcus                                                  | 5.40064995  | CCR | 4.9665776 | 2.02E-05 |
| d__Bacteria.p__Firmicutes.c__Syntrophomonadia.o__Syntrophomonadales                                                                           | 0.557163342 |     |           | -        |
| d__Bacteria.p__Firmicutes.c__Bacilli.o__Erysipelotrichales.f__Erysipelatoclostridiaceae.g__Eggerthia                                          | 1.187722109 |     |           | -        |
| d__Bacteria.p__Proteobacteria.c__Gammaproteobacteria.o__Burkholderiales.f__Neisseriaceae.g__Neisseria                                         | 5.215913965 | H   | 4.3652894 | 3.25E-05 |
| d__Bacteria.p__Bacteroidota.c__Bacteroidia.o__Bacteroidales.f__Bacteroidales_unclassified.g__Bacteroidales_unclassified                       | 1.514547753 |     |           | -        |
| d__Bacteria.p__Actinobacteriota.c__Actinobacteria.o__Actinomycetales.f__Actinomycetaceae.g__Actinotignum                                      | 0.794886208 |     |           | -        |
| d__Bacteria.p__Proteobacteria.c__Alphaproteobacteria.o__Rhizobiales.f__Hyphomicrobiaceae                                                      | 0.6734159   |     |           | -        |
| d__Bacteria.p__Proteobacteria.c__Alphaproteobacteria.o__Rhizobiales.f__Devosiaceae.g__Pelagibacterium                                         | 2.774906741 |     |           | -        |
| d__Bacteria.p__Bacteroidota.c__Bacteroidia.o__Bacteroidales.f__Marinifilaceae.g__Odoribacter                                                  | 2.155596276 |     |           | -        |
| d__Bacteria.p__Verucomicrobiota.c__Lentisphaeria.o__Victivallales.f__Victivallaceae                                                           | 0.525969822 |     |           | -        |
| d__Bacteria.p__Actinobacteriota.c__Actinobacteria.o__Bifidobacteriales.f__Bifidobacteriaceae.g__Bifidobacterium                               | 2.966497072 |     |           | -        |
| d__Bacteria.p__Patiscibacteria.c__Gracilibacteria.o__Absconditabacteriales__SR1_                                                              | 3.897290442 | H   | 3.5933173 | 1.13E-25 |
| d__Bacteria.p__Proteobacteria.c__Gammaproteobacteria.o__Cardiobacteriales.f__Cardiobacteriaceae                                               | 3.215095978 | CCR | 3.2473845 | 1.33E-07 |
| d__Bacteria.p__Firmicutes.c__Clostridia.o__Peptostreptococcales_Tissierellales.f__Peptostreptococcales_Tissierellales.g__Anaerococcus         | 1.166683791 |     |           | -        |
| d__Bacteria.p__Firmicutes.c__Clostridia.o__Christensenellales                                                                                 | 2.743408963 |     |           | -        |
| d__Bacteria.p__Firmicutes.c__Clostridia.o__Peptostreptococcales_Tissierellales.f__Peptostreptococcaceae.g__Peptostreptococcaceae_unclassified | 2.014250446 | H   | 3.3969697 | 1.05E-06 |
| d__Bacteria.p__Proteobacteria.c__Gammaproteobacteria.o__Alteromonadales.f__Idiomarinaceae.g__Aliidimarina                                     | 1.75221313  |     |           | -        |
| d__Bacteria.p__Planctomycetota.c__Planctomycetes.o__Pirellulales                                                                              | 0.516629796 |     |           | -        |
| d__Bacteria.p__Firmicutes.c__Clostridia.o__Oscillospirales.f__Oscillospiraceae.g__UCG_005                                                     | 2.318867943 |     |           | -        |
| d__Bacteria.p__Firmicutes.c__Clostridia.o__Lachnospirales.f__Lachnospiraceae.g__Butyrivibrio                                                  | 2.520324421 |     |           | -        |
| d__Bacteria.p__Desulfobacterota.c__Desulfovibrionia.o__Desulfovibrionales                                                                     | 2.517450403 |     |           | -        |
| d__Bacteria.p__Actinobacteriota.c__Actinobacteria.o__Micrococcales.f__Micrococcaceae.g__Rothia                                                | 4.536311888 |     |           | -        |
| d__Bacteria.p__Bacteroidota.c__Bacteroidia.o__Bacteroidales.f__Prevotellaceae.g__Prevotellaceae_Ga6A1_group                                   | 1.528733105 |     |           | -        |
| d__Bacteria.p__Firmicutes.c__Clostridia.o__Clostridia_vadinBB60_group.f__Clostridia_vadinBB60_group.g__Clostridia_vadinBB60_group             | 2.703408075 |     |           | -        |
| d__Bacteria.p__Firmicutes.c__Clostridia.o__Peptostreptococcales_Tissierellales.f__Anaerovoracaceae.g__Anaerovoracaceae_uncultured             | 1.985618909 | H   | 3.4636588 | 4.37E-07 |

|                                                                                                                                                                         |             |     |           |          |
|-------------------------------------------------------------------------------------------------------------------------------------------------------------------------|-------------|-----|-----------|----------|
| d__Bacteria.p__Firmicutes.c__Bacilli.o__Bacilli_unclassified.f__Bacilli_unclassified.g__Bacilli_unclassified                                                            | 2.144017919 |     |           | -        |
| d__Bacteria.p__Proteobacteria.c__Alphaproteobacteria.o__Caulobacteriales.f__Caulobacteraceae.g__Phenylobacterium                                                        | 0.721008364 |     |           | -        |
| d__Bacteria.p__Proteobacteria.c__Gammaproteobacteria.o__Burkholderiales.f__Sutterellaceae.g__Sutterella                                                                 | 2.170324591 |     |           | -        |
| d__Bacteria.p__Firmicutes.c__Clostridia.o__Peptostreptococcales_Tissierellales.f__Peptostreptococcales_Tissierellales                                                   | 3.344811767 | H   | 3.0602201 | 1.32E-20 |
| d__Bacteria.p__Desulfobacterota.c__Desulfovibrionia.o__Desulfovibrionales.f__Desulfomicrobiaceae.g__Desulfomicrobium                                                    | 0.955275315 |     |           | -        |
| d__Bacteria.p__Proteobacteria.c__Gammaproteobacteria.o__Burkholderiales.f__Comamonadaceae.g__Acidovorax                                                                 | 2.487239409 |     |           | -        |
| d__Bacteria.p__Firmicutes.c__Syntrophomonadia.o__Syntrophomonadales.f__Syntrophomonadaceae                                                                              | 0.557163342 |     |           | -        |
| d__Bacteria.p__Firmicutes.c__Clostridia.o__Clostridia_UCG_014                                                                                                           | 3.571943298 | H   | 3.2027096 | 4.61E-18 |
| d__Bacteria.p__Firmicutes.c__Bacilli.o__Erysipelotrichales.f__Erysipelotrichaceae.g__Holdemanella                                                                       | 1.218047597 |     |           | -        |
| d__Bacteria.p__Bacteroidota.c__Bacteroidia.o__Bacteroidales.f__p_2534_18B5_gut_group.g__p_2534_18B5_gut_group                                                           | 1.108178297 |     |           | -        |
| d__Bacteria.p__Proteobacteria.c__Gammaproteobacteria.o__Burkholderiales                                                                                                 | 5.33959235  | CCR | 4.5767478 | 0.000129 |
| d__Bacteria.p__Firmicutes.c__Clostridia.o__Lachnospirales.f__Lachnospiraceae.g__Roseburia                                                                               | 2.919007075 | H   | 3.0066053 | 4.85E-17 |
| d__Bacteria.p__Proteobacteria.c__Alphaproteobacteria.o__Rickettsiales                                                                                                   | 1.871556943 |     |           | -        |
| d__Bacteria.p__Firmicutes.c__Clostridia.o__Peptostreptococcales_Tissierellales.f__Anaerovoracaceae.g__Eubacterium_nodatum_group                                         | 3.389098972 |     |           | -        |
| d__Bacteria                                                                                                                                                             | 6           |     |           | -        |
| d__Bacteria.p__Firmicutes.c__Bacilli.o__Mycoplasmatales.f__Mycoplasmataceae                                                                                             | 2.727285578 |     |           | -        |
| d__Bacteria.p__Bacteroidota.c__Bacteroidia.o__Sphingobacteriales.f__Sphingobacteriales_unclassified                                                                     | 0.770852012 |     |           | -        |
| d__Bacteria.p__Firmicutes.c__Clostridia.o__Lachnospirales.f__Lachnospiraceae.g__Ruminococcus_gauvreauii_group                                                           | 1.856685744 |     |           | -        |
| d__Bacteria.p__Firmicutes.c__Clostridia.o__Lachnospirales.f__Lachnospiraceae.g__Ruminococcus_gnavus_group                                                               | 1.643170575 |     |           | -        |
| d__Bacteria.p__Firmicutes.c__Clostridia.o__Oscillospirales.f__Ruminococcaceae.g__Ruminococcaceae_uncultured                                                             | 1.95469036  |     |           | -        |
| d__Bacteria.p__Patescibacteria.c__Gracilibacteria.o__Gracilibacteria                                                                                                    | 2.73900693  |     |           | -        |
| d__Bacteria.p__Proteobacteria.c__Gammaproteobacteria.o__Pseudomonadales.f__Moraxellaceae                                                                                | 4.040106512 | H   | 3.7353504 | 4.12E-18 |
| d__Bacteria.p__Firmicutes.c__Bacilli.o__Lactobacillales.f__Lactobacillaceae.g__Pediococcus                                                                              | 0           |     |           | -        |
| d__Bacteria.p__Proteobacteria.c__Gammaproteobacteria.o__Pseudomonadales.f__Moraxellaceae.g__Moraxella                                                                   | 3.989916789 |     |           | -        |
| d__Bacteria.p__Firmicutes.c__Clostridia.o__Peptostreptococcales_Tissierellales.f__Peptostreptococcales_Tissierellales.g__Peptostreptococcales_Tissierellales_uncultured | 1.51054501  |     |           | -        |
| d__Bacteria.p__Firmicutes.c__Clostridia.o__Lachnospirales.f__Lachnospiraceae.g__GCA_900066575                                                                           | 1.453427555 |     |           | -        |
| d__Bacteria.p__Firmicutes.c__Clostridia.o__Monoglobales.f__Monoglobaceae.g__Monoglobus                                                                                  | 2.059752694 |     |           | -        |
| d__Bacteria.p__Spirochaetaota.c__Spirochaetaia.o__Spirochaetales.f__Spirochaetaeae.g__Treponema                                                                         | 3.453788862 | H   | 3.0213586 | 1.08E-14 |
| d__Bacteria.p__Proteobacteria.c__Alphaproteobacteria.o__Caulobacteriales.f__Caulobacteraceae.g__Caulobacter                                                             | 1.608755193 |     |           | -        |
| d__Bacteria.p__Verrucomicrobiota.c__Lentisphaeria.o__Victivallales.f__Victivallaceae.g__Victivallis                                                                     | 0.525969822 |     |           | -        |
| d__Bacteria.p__Cyanobacteria.c__Cyanobacteriia.o__Chloroplast.f__Chloroplast                                                                                            | 2.655493664 |     |           | -        |
| d__Bacteria.p__Firmicutes.c__Clostridia.o__Christensenellales.f__Christensenellaceae                                                                                    | 2.743408963 |     |           | -        |
| d__Bacteria.p__Proteobacteria.c__Gammaproteobacteria.o__Burkholderiales.f__Chromobacteriaceae                                                                           | 0           |     |           | -        |
| d__Bacteria.p__Firmicutes.c__Clostridia.o__Lachnospirales.f__Lachnospiraceae.g__Howardella                                                                              | 1.040309656 |     |           | -        |
| d__Bacteria.p__Firmicutes.c__Clostridia.o__Peptococcales.f__Peptococcaceae.g__Peptococcus                                                                               | 2.543606916 | H   | 3.4210447 | 3.45E-19 |
| d__Bacteria.p__Firmicutes.c__Clostridia.o__Lachnospirales.f__Lachnospiraceae.g__Lachnospira                                                                             | 2.581965904 | H   | 3.2728294 | 7.44E-10 |
| d__Bacteria.p__Firmicutes.c__Bacilli.o__Lactobacillales.f__P5D1_392                                                                                                     | 2.970270434 |     |           | -        |
| d__Bacteria.p__Elusimicrobiota                                                                                                                                          | 0.727773562 |     |           | -        |
| d__Bacteria.p__Firmicutes.c__Bacilli.o__Erysipelotrichales.f__Erysipelotrichaceae.g__Erysipelotrichaceae_uncultured                                                     | 0.943423847 |     |           | -        |
| d__Bacteria.p__Patescibacteria.c__Gracilibacteria.o__Absconditabacteriales_SR1.f__Absconditabacteriales_SR1                                                             | 3.897290442 | H   | 3.5961296 | 1.13E-25 |
| d__Bacteria.p__Bacteroidota.c__Bacteroidia.o__Bacteroidales.f__Prevotellaceae.g__Prevotellaceae_NK3B31_group                                                            | 2.69113835  |     |           | -        |
| d__Bacteria.p__Firmicutes.c__Bacilli.o__Staphylococcales.f__Staphylococcaceae                                                                                           | 1.938555462 |     |           | -        |
| d__Bacteria.p__Firmicutes.c__Clostridia.o__Peptostreptococcales_Tissierellales.f__Peptostreptococcaceae.g__Peptostreptococcus                                           | 3.541427067 | CC  | 3.1273639 | 2.02E-05 |
| d__Bacteria.p__Firmicutes                                                                                                                                               | 5.629544682 | CCR | 4.9980954 | 3.34E-07 |
| d__Bacteria.p__Firmicutes.c__Bacilli.o__Brevibacillales.f__Brevibacillaceae.g__Brevibacillus                                                                            | 0.599727159 |     |           | -        |
| d__Bacteria.p__Firmicutes.c__Bacilli.o__Erysipelotrichales.f__Erysipelotrichaceae.g__Solobacterium                                                                      | 3.588442189 | H   | 3.2043404 | 2.69E-13 |
| d__Bacteria.p__Proteobacteria.c__Gammaproteobacteria.o__Burkholderiales.f__Neisseriaceae.g__Neisseriaceae_unclassified                                                  | 3.372427727 |     |           | -        |
| d__Bacteria.p__Chloroflexi.c__Anaerolineae.o__Anaerolineales.f__Anaerolineaceae.g__Flexilinea                                                                           | 0.995635195 |     |           | -        |
| d__Bacteria.p__Bacteroidota.c__Bacteroidia.o__Bacteroidales.f__Marinifilaceae                                                                                           | 2.164713909 |     |           | -        |
| d__Bacteria.p__Firmicutes.c__Clostridia.o__Peptococcales.f__Peptococcaceae                                                                                              | 2.582014636 | H   | 3.1567532 | 1.64E-21 |
| d__Bacteria.p__Firmicutes.c__Clostridia.o__Peptostreptococcales_Tissierellales.f__Peptostreptococcaceae                                                                 | 3.721441974 | H   | 3.2628521 | 2.60E-09 |
| d__Bacteria.p__Bacteroidota.c__Bacteroidia.o__Bacteroidales.f__Muribaculaceae                                                                                           | 3.63868461  | H   | 3.3539332 | 9.08E-18 |
| d__Bacteria.p__Actinobacteriota.c__Coriobacteriia.o__Coriobacteriales.f__Coriobacteriaceae                                                                              | 1.352733653 |     |           | -        |
| d__Bacteria.p__Synergistota.c__Synergistia.o__Synergistales.f__Synergistaceae.g__Pyramidobacter                                                                         | 1.361727836 |     |           | -        |
| d__Bacteria.p__Firmicutes.c__Clostridia.o__Lachnospirales.f__Lachnospiraceae.g__Dorea                                                                                   | 1.42975228  |     |           | -        |

|                                                                                                                                                |             |     |           |          |
|------------------------------------------------------------------------------------------------------------------------------------------------|-------------|-----|-----------|----------|
| d__Bacteria.p__Proteobacteria.c__Gammaproteobacteria.o__Burkholderiales.f__Alcaligenaceae.g__Alcaligenes                                       | 2.114086503 | H   | 3.591732  | 3.51E-18 |
| d__Bacteria.p__Elusimicrobiota.c__Elusimicrobia.o__Lineage_IV.f__Lineage_IV.g__Lineage_IV                                                      | 0.299476168 |     |           | -        |
| d__Bacteria.p__Firmicutes.c__Bacilli.o__Lactobacillales.f__Carnobacteriaceae                                                                   | 4.203495235 | CCR | 3.5974183 | 0.000291 |
| d__Bacteria.p__Firmicutes.c__Negativicutes.o__Veillonellales_Selenomonadales.f__Selenomonadaceae.g__Selenomonadaceae_uncultured                | 2.758890274 |     |           | -        |
| d__Bacteria.p__Planctomycetota.c__Planctomycetes.o__Pirellulales.f__Pirellulaceae.g__Pirellula                                                 | 0.232269865 |     |           | -        |
| d__Bacteria.p__Proteobacteria.c__Gammaproteobacteria.o__Burkholderiales.f__Comamonadaceae                                                      | 2.860919529 | H   | 3.0348739 | 1.44E-11 |
| d__Bacteria.p__Firmicutes.c__Bacilli.o__Izomoplasmatales.f__Izomoplasmatales                                                                   | 1.43513877  |     |           | -        |
| d__Bacteria.p__Patiscibacteria.c__Saccharimonadia.o__Saccharimonadales.f__Saccharimonadaceae.g__Candidatus_Saccharimonas                       | 3.099098298 |     |           | -        |
| d__Bacteria.p__Firmicutes.c__Syntrophomonadia                                                                                                  | 0.557163342 |     |           | -        |
| d__Bacteria.p__Actinobacteriota.c__Actinobacteria.o__Actinomycetales.f__Actinomycetaceae.g__Mobiluncus                                         | 1.594629288 |     |           | -        |
| d__Bacteria.p__Firmicutes.c__Clostridia.o__Oscillospirales.f__Ruminococcaceae.g__Ruminococcaceae_Incertae_Sedis                                | 1.922428859 |     |           | -        |
| d__Bacteria.p__Actinobacteriota.c__Actinobacteria.o__Pseudonocardiales                                                                         | 0           |     |           | -        |
| d__Bacteria.p__Bacteria_unclassified.c__Bacteria_unclassified.o__Bacteria_unclassified.f__Bacteria_unclassified                                | 2.987059901 |     |           | -        |
| d__Bacteria.p__Firmicutes.c__Clostridia.o__Oscillospirales                                                                                     | 3.858286637 | H   | 3.5405953 | 5.05E-17 |
| d__Bacteria.p__Cyanobacteria.c__Cyanobacteriia.o__Cyanobacteriales.f__Chroococcidiopsaceae                                                     | 0.496336485 |     |           | -        |
| d__Bacteria.p__Firmicutes.c__Clostridia.o__Lachnospirales.f__Lachnospiraceae.g__Eubacterium_hallii_group                                       | 1.739628845 |     |           | -        |
| d__Bacteria.p__Patiscibacteria.c__Saccharimonadia.o__Saccharimonadales.f__Saccharimonadaceae.g__TM7x                                           | 4.00687264  | H   | 3.6532011 | 6.36E-16 |
| d__Bacteria.p__Firmicutes.c__Bacilli.o__Lactobacillales.f__Enterococcaceae                                                                     | 1.174433645 |     |           | -        |
| d__Bacteria.p__Proteobacteria.c__Alphaproteobacteria.o__Caulobacteriales                                                                       | 2.039640698 | H   | 3.5182783 | 8.67E-06 |
| d__Bacteria.p__Firmicutes.c__Clostridia.o__Lachnospirales.f__Lachnospiraceae.g__Shuttleworthia                                                 | 2.776939884 |     |           | -        |
| d__Bacteria.p__Proteobacteria.c__Alphaproteobacteria.o__Rhizobiales.f__Rhizobiaceae.g__Aliiohioflea                                            | 1.341068472 |     |           | -        |
| d__Bacteria.p__Firmicutes.c__Clostridia.o__Clostridia_UCG_014.f__Clostridia_UCG_014                                                            | 3.571943298 | H   | 3.2027096 | 4.61E-18 |
| d__Bacteria.p__Verrucomicrobiota.c__Verrucomicrobiae.o__Verrucomicrobiales                                                                     | 1.819308864 |     |           | -        |
| d__Bacteria.p__Firmicutes.c__Bacilli.o__Lactobacillales.f__Carnobacteriaceae.g__Granulicatella                                                 | 4.203495235 | CCR | 3.5980156 | 0.000294 |
| d__Bacteria.p__Proteobacteria.c__Alphaproteobacteria.o__Rhizobiales.f__Devosiaceae                                                             | 2.777625416 |     |           | -        |
| d__Bacteria.p__Firmicutes.c__Bacilli.o__Erysipelotrichales.f__Erysipelotrichaceae.g__Bulleidia                                                 | 1.517290177 |     |           | -        |
| d__Bacteria.p__Proteobacteria.c__Gammaproteobacteria.o__Enterobacteriales                                                                      | 2.778636975 |     |           | -        |
| d__Bacteria.p__Firmicutes.c__Bacilli.o__Lactobacillales.f__Aerococcaceae                                                                       | 3.627712023 | CCR | 3.2667449 | 0.028159 |
| d__Bacteria.p__Proteobacteria.c__Gammaproteobacteria.o__Burkholderiales.f__Methylophilaceae                                                    | 0.625227856 |     |           | -        |
| d__Bacteria.p__Firmicutes.c__Negativicutes.o__Veillonellales_Selenomonadales.f__Veillonellaceae.g__Megasphaera                                 | 3.675464746 | H   | 3.2576162 | 0.001227 |
| d__Bacteria.p__Firmicutes.c__Clostridia.o__Lachnospirales.f__Lachnospiraceae.g__Catonella                                                      | 3.120054253 |     |           | -        |
| d__Bacteria.p__Bacteroidota.c__Bacteroidia.o__Bacteroidales.f__Paludibacteraceae.g__F0058                                                      | 2.876106448 |     |           | -        |
| d__Bacteria.p__Firmicutes.c__Bacilli.o__Bacillales                                                                                             | 1.651278014 |     |           | -        |
| d__Bacteria.p__Deferribacterota.c__Deferribacteres.o__Deferribacterales.f__Deferribacteraceae.g__Mucispirillum                                 | 2.440335489 |     |           | -        |
| d__Bacteria.p__Fusobacteriota.c__Fusobacteriia.o__Fusobacteriales                                                                              | 5.147631904 |     |           | -        |
| d__Bacteria.p__Deinococota.c__Deinococci.o__Deinococcales.f__Deinococcaceae.g__Deinococcus                                                     | 1.146128036 |     |           | -        |
| d__Bacteria.p__Firmicutes.c__Firmicutes_unclassified.o__Firmicutes_unclassified                                                                | 1.440520915 |     |           | -        |
| d__Bacteria.p__Firmicutes.c__Clostridia.o__Clostridiales.f__Clostridiaceae                                                                     | 1.746356144 |     |           | -        |
| d__Bacteria.p__Firmicutes.c__Bacilli.o__Erysipelotrichales.f__Erysipelotrichaceae.g__Dubosiella                                                | 0.423245874 |     |           | -        |
| d__Bacteria.p__Cyanobacteria.c__Cyanobacteriia.o__Chloroplast                                                                                  | 2.655493664 |     |           | -        |
| d__Bacteria.p__Proteobacteria.c__Gammaproteobacteria.o__Burkholderiales.f__Comamonadaceae.g__Brachymonas                                       | 0.235889007 |     |           | -        |
| d__Bacteria.p__Actinobacteriota.c__Actinobacteria.o__Actinobacteria_unclassified.f__Actinobacteria_unclassified.g__Actinobacteria_unclassified | 3.104482434 |     |           | -        |
| d__Bacteria.p__Proteobacteria.c__Gammaproteobacteria.o__Enterobacteriales.f__Enterobacteriaceae                                                | 2.483077621 |     |           | -        |
| d__Bacteria.p__Firmicutes.c__Clostridia.o__Lachnospirales.f__Defluviitaleaceae.g__Defluviitaleaceae_UCG_011                                    | 2.331268185 | H   | 3.3105737 | 2.03E-14 |
| d__Bacteria.p__Actinobacteriota.c__Actinobacteria.o__Pseudonocardiales.f__Pseudonocardaceae                                                    | 0           |     |           | -        |
| d__Bacteria.p__Firmicutes.c__Clostridia.o__Lachnospirales.f__Lachnospiraceae.g__Lachnospiraceae_UCG_006                                        | 1.740531862 |     |           | -        |
| d__Bacteria.p__Firmicutes.c__Clostridia.o__Clostridiales.f__Clostridiaceae.g__Candidatus_Arthromitus                                           | 0.872572463 |     |           | -        |
| d__Bacteria.p__Firmicutes.c__Clostridia                                                                                                        | 4.774478696 | H   | 4.3321609 | 1.70E-16 |
| d__Bacteria.p__Actinobacteriota.c__Actinobacteria.o__Micrococcales.f__Micrococcales_unclassified.g__Micrococcales_unclassified                 | 2.000950837 |     |           | -        |
| d__Bacteria.p__Proteobacteria.c__Gammaproteobacteria.o__Burkholderiales.f__Neisseriaceae.g__Kingella                                           | 3.163365628 |     |           | -        |
| d__Bacteria.p__Bacteroidota.c__Bacteroidia.o__Bacteroidia_unclassified                                                                         | 0.534207478 |     |           | -        |
| d__Bacteria.p__Firmicutes.c__Clostridia.o__Oscillospirales.f__Oscillospiraceae.g__Oscillospiraceae_unclassified                                | 2.478319081 |     |           | -        |
| d__Bacteria.p__Proteobacteria.c__Gammaproteobacteria.o__Xanthomonadales.f__Xanthomonadaceae                                                    | 2.687186776 |     |           | -        |
| d__Bacteria.p__Bacteroidota.c__Bacteroidia.o__Bacteroidales.f__F082.g__F082                                                                    | 1.190523567 |     |           | -        |
| d__Bacteria.p__Verrucomicrobiota.c__Verrucomicrobiae.o__Verrucomicrobiales.f__Akkermansiaceae.g__Akkermansia                                   | 1.819308864 |     |           | -        |
| d__Bacteria.p__Patiscibacteria.c__Saccharimonadia.o__Saccharimonadales.f__Saccharimonadaceae                                                   | 4.121187808 | H   | 3.743662  | 2.75E-16 |

|                                                                                                                                            |             |     |           |          |
|--------------------------------------------------------------------------------------------------------------------------------------------|-------------|-----|-----------|----------|
| d__Bacteria.p__Firmicutes.c__Clostridia.o__Lachnospirales.f__Lachnospiraceae.g__Eubacterium_xylanophilum_group                             | 2.070064267 |     |           | -        |
| d__Bacteria.p__Actinobacteriota.c__Actinobacteria.o__Corynebacteriales.f__Corynebacteriaceae.g__Lawsonella                                 | 1.89030123  |     |           | -        |
| d__Bacteria.p__Firmicutes.c__Clostridia.o__Oscillospirales.f__Ruminococcaceae.g__Ruminococcus                                              | 2.594873781 | H   | 3.0983552 | 1.42E-07 |
| d__Bacteria.p__Actinobacteriota.c__Actinobacteria.o__Micrococcales                                                                         | 4.537188026 |     |           | -        |
| d__Bacteria.p__Desulfobacterota.c__Desulfovibrionia.o__Desulfovibrionales.f__Desulfovibrionaceae.g__Desulfovibrio                          | 1.921314807 |     |           | -        |
| d__Bacteria.p__Bacteroidota.c__Bacteroidia.o__Bacteroidales.f__Prevotellaceae.g__Prevotellaceae_UCG_001                                    | 2.25544481  |     |           | -        |
| d__Bacteria.p__Firmicutes.c__Bacilli.o__Izempiasmatales                                                                                    | 1.43513877  |     |           | -        |
| d__Bacteria.p__Proteobacteria.c__Gammaproteobacteria.o__Burkholderiales.f__Burkholderiales_unclassified                                    | 2.960744369 |     |           | -        |
| d__Bacteria.p__Firmicutes.c__Negativicutes                                                                                                 | 5.10833028  |     |           | -        |
| d__Bacteria.p__Actinobacteriota.c__Actinobacteria.o__Frankiales.f__Frankiales_uncultured                                                   | 0.890899844 |     |           | -        |
| d__Bacteria.p__Firmicutes.c__Clostridia.o__Monoglobales                                                                                    | 2.059752694 |     |           | -        |
| d__Bacteria.p__Actinobacteriota.c__Actinobacteria.o__Micrococcales.f__Micrococcaceae                                                       | 4.536311888 |     |           | -        |
| d__Bacteria.p__Patescibacteria.c__Saccharimonadia.o__Saccharimonadales.f__Saccharimonadales_unclassified.g__Saccharimonadales_unclassified | 1.306169635 |     |           | -        |
| d__Bacteria.p__Firmicutes.c__Clostridia.o__Peptostreptococcales_Tissierellales.f__Peptostreptococcaceae.g__Romboutsia                      | 1.466973481 |     |           | -        |
| d__Bacteria.p__Actinobacteriota.c__Actinobacteria.o__Actinobacteria_unclassified.f__Actinobacteria_unclassified                            | 3.104482434 |     |           | -        |
| d__Bacteria.p__Firmicutes.c__Bacilli.o__Mycoplasmatales                                                                                    | 2.727285578 |     |           | -        |
| d__Bacteria.p__Firmicutes.c__Clostridia.o__Clostridia_unclassified                                                                         | 0.02413368  |     |           | -        |
| d__Bacteria.p__Bacteroidota.c__Bacteroidia.o__Cytophagales.f__Hymenobacteraceae.g__Adhaeribacter                                           | 0.510927817 |     |           | -        |
| d__Bacteria.p__Cyanobacteria                                                                                                               | 2.655493664 |     |           | -        |
| d__Bacteria.p__Proteobacteria.c__Alphaproteobacteria.o__Rhizobiales.f__Rhizobiaceae                                                        | 2.584408682 |     |           | -        |
| d__Bacteria.p__Firmicutes.c__Bacilli.o__RF39.f__RF39.g__RF39                                                                               | 2.411643753 | H   | 3.0999493 | 8.61E-21 |
| d__Bacteria.p__Firmicutes.c__Clostridia.o__Oscillospirales.f__Ruminococcaceae.g__Ruminococcaceae_unclassified                              | 1.321628016 |     |           | -        |
| d__Bacteria.p__Bacteroidota.c__Bacteroidia.o__Bacteroidales.f__Prevotellaceae.g__Prevotellaceae_uncultured                                 | 1.911385924 | H   | 3.2219784 | 5.02E-05 |
| d__Bacteria.p__Firmicutes.c__Clostridia.o__Lachnospirales.f__Defluviitaleaceae                                                             | 2.331268185 | H   | 3.339986  | 2.03E-14 |
| d__Bacteria.p__Proteobacteria.c__Alphaproteobacteria                                                                                       | 3.172194128 |     |           | -        |
| d__Bacteria.p__Actinobacteriota.c__Actinobacteria.o__Corynebacteriales.f__Nocardiaceae                                                     | 3.33472223  | H   | 3.0529073 | 6.09E-10 |
| d__Bacteria.p__Firmicutes.c__Bacilli.o__Bacillales.f__Planococcaceae                                                                       | 0.280383226 |     |           | -        |
| d__Bacteria.p__Firmicutes.c__Clostridia.o__Monoglobales.f__Monoglobaceae                                                                   | 2.059752694 |     |           | -        |
| d__Bacteria.p__Firmicutes.c__Clostridia.o__Lachnospirales.f__Lachnospiraceae.g__Lachnospiraceae_UCG_003                                    | 2.068901142 |     |           | -        |
| d__Bacteria.p__Proteobacteria.c__Gammaproteobacteria.o__Burkholderiales.f__Comamonadaceae.g__Comamonadaceae_unclassified                   | 0.617299958 |     |           | -        |
| d__Bacteria.p__Bacteroidota.c__Bacteroidia.o__Flavobacteriales.f__Flavobacteriaceae.g__Flavobacterium                                      | 0.75858751  |     |           | -        |
| d__Bacteria.p__Bacteroidota.c__Bacteroidia.o__Bacteroidales.f__Bacteroidales_Bacteroidales_Incertae_Sedis                                  | 1.567558086 |     |           | -        |
| d__Bacteria.p__Firmicutes.c__Clostridia.o__Lachnospirales.f__Lachnospiraceae.g__Eubacterium_eligens_group                                  | 2.6214582   | H   | 3.0567617 | 2.54E-09 |
| d__Bacteria.p__Actinobacteriota.c__Actinobacteria.o__Frankiales.f__Frankiales_uncultured.g__Frankiales_uncultured                          | 0.890899844 |     |           | -        |
| d__Bacteria.p__Bacteroidota.c__Bacteroidia.o__Bacteroidales.f__Rikenellaceae.g__Rikenellaceae_RC9_gut_group                                | 2.548564891 | H   | 3.0502377 | 2.00E-15 |
| d__Bacteria.p__Bacteroidota.c__Bacteroidia.o__Bacteroidales.f__Muribaculaceae.g__Muribaculaceae                                            | 3.635925141 | H   | 3.3510624 | 9.08E-18 |
| d__Bacteria.p__Firmicutes.c__Clostridia.o__Lachnospirales.f__Lachnospiraceae.g__Tyzzerella                                                 | 1.358750424 |     |           | -        |
| d__Bacteria.p__Proteobacteria.c__Alphaproteobacteria.o__Rhizobiales                                                                        | 3.005109962 | CC  | 3.0661916 | 9.39E-09 |
| d__Bacteria.p__Proteobacteria.c__Alphaproteobacteria.o__Rhizobiales.f__Xanthobacteraceae                                                   | 1.567110426 |     |           | -        |
| d__Bacteria.p__Firmicutes.c__Bacilli.o__Bacillales.f__Bacillaceae                                                                          | 1.632384976 |     |           | -        |
| d__Bacteria.p__Campilobacterota                                                                                                            | 4.013369376 | H   | 3.5601255 | 5.89E-16 |
| d__Bacteria.p__Fusobacteriota.c__Fusobacteriia.o__Fusobacteriales.f__Leptotrichiaceae.g__Streptobacillus                                   | 2.227794917 |     |           | -        |
| d__Bacteria.p__Proteobacteria.c__Gammaproteobacteria.o__Burkholderiales.f__Rhodocyclaceae.g__Propionivibrio                                | 0.36967325  |     |           | -        |
| d__Bacteria.p__Firmicutes.c__Bacilli.o__Bacillales.f__Bacillaceae.g__Bacillus                                                              | 1.427903232 |     |           | -        |
| d__Bacteria.p__Verrucomicrobiota.c__Verrucomicrobiae.o__Verrucomicrobiales.f__Akkermansiaceae                                              | 1.819308864 |     |           | -        |
| d__Bacteria.p__Proteobacteria.c__Gammaproteobacteria.o__Pseudomonadales.f__Moraxellaceae.g__Faucicola                                      | 0.770852012 |     |           | -        |
| d__Bacteria.p__Firmicutes.c__Clostridia.o__Lachnospirales.f__Lachnospiraceae.g__Lachnospiraceae_uncultured                                 | 3.595337938 | H   | 3.274093  | 8.26E-12 |
| d__Bacteria.p__Firmicutes.c__Bacilli.o__Lactobacillales.f__Streptococcaceae.g__Lactococcus                                                 | 1.401236377 |     |           | -        |
| d__Bacteria.p__Planctomycetota.c__Planctomycetes.o__Pirellulales.f__Pirellulaceae                                                          | 0.516629796 |     |           | -        |
| d__Bacteria.p__Actinobacteriota.c__Actinobacteria.o__Bifidobacteriales.f__Bifidobacteriaceae.g__Scardovia                                  | 2.839357496 |     |           | -        |
| d__Bacteria.p__Actinobacteriota.c__Actinobacteria.o__Micrococcales.f__Dermabacteraceae                                                     | 0.15490196  |     |           | -        |
| d__Bacteria.p__Actinobacteriota.c__Actinobacteria.o__Corynebacteriales                                                                     | 3.701339122 | H   | 3.235303  | 2.74E-13 |
| d__Bacteria.p__Firmicutes.c__Bacilli.o__Paenibacillales.f__Paenibacillaceae                                                                | 0.750518962 |     |           | -        |
| d__Bacteria.p__Proteobacteria.c__Gammaproteobacteria.o__Burkholderiales.f__Burkholderiaceae                                                | 4.749665657 | CCR | 4.4360762 | 1.95E-10 |
| d__Bacteria.p__Firmicutes.c__Bacilli.o__Paenibacillales.f__Paenibacillaceae.g__Paenibacillus                                               | 0.750518962 |     |           | -        |
| d__Bacteria.p__Firmicutes.c__Clostridia.o__Peptostreptococcales_Tissierellales.f__Peptostreptococcaceae.g__Filifactor                      | 3.222179308 | H   | 3.0442316 | 1.64E-17 |
| d__Bacteria.p__Firmicutes.c__Clostridia.o__Lachnospirales.f__Lachnospiraceae.g__Lachnospiraceae_NK4A136_group                              | 3.247866345 | H   | 3.0999406 | 1.30E-14 |

|                                                                                                                                         |             |     |           |          |
|-----------------------------------------------------------------------------------------------------------------------------------------|-------------|-----|-----------|----------|
| d__Bacteria.p__Bacteroidota.c__Bacteroidia.o__Cytophagales.f__Hymenobacteraceae.g__Hymenobacter                                         | 0.395451208 |     |           | -        |
| d__Bacteria.p__Proteobacteria.c__Alphaproteobacteria.o__Rhizobiales.f__Beijerinckiaceae.g__Bosea                                        | 0.909731833 |     |           | -        |
| d__Bacteria.p__Bacteroidota.c__Bacteroidia.o__Sphingobacteriales.f__Lentimicrobiaceae.g__Lentimicrobium                                 | 2.522723612 | H   | 3.2807814 | 6.86E-20 |
| d__Bacteria.p__Firmicutes.c__Clostridia.o__Peptostreptococcales_Tissierellales.f__Peptostreptococcales_Tissierellales.g__Parvimonas     | 3.324892156 | H   | 3.0337185 | 3.92E-20 |
| d__Bacteria.p__Verrucomicrobiota.c__Lentisphaeria                                                                                       | 0.525969822 |     |           | -        |
| d__Bacteria.p__Elusimicrobiota.c__Elusimicrobia.o__Lineage_IV.f__Lineage_IV                                                             | 0.299476168 |     |           | -        |
| d__Bacteria.p__Proteobacteria.c__Gammaproteobacteria.o__Pasteurellales.f__Pasteurellaceae.g__Actinobacillus                             | 3.943196569 | H   | 3.6105848 | 7.04E-21 |
| d__Bacteria.p__Actinobacteriota.c__Actinobacteria.o__Micrococcales.f__Micrococcaceae.g__Nesterenkonia                                   | 1.091401931 |     |           | -        |
| d__Bacteria.p__Firmicutes.c__Clostridia.o__Lachnospirales.f__Lachnospiraceae.g__Eubacterium_ruminantium_group                           | 2.808288157 | H   | 3.0410501 | 1.19E-13 |
| d__Bacteria.p__Proteobacteria.c__Gammaproteobacteria.o__Oceanospirillales.f__Halomonadaceae                                             | 3.951764536 | CC  | 3.6185296 | 1.56E-10 |
| d__Bacteria.p__Bacteroidota.c__Bacteroidia.o__Bacteroidales.f__Bacteroidaceae                                                           | 3.802908536 | H   | 3.4875914 | 3.81E-20 |
| d__Bacteria.p__Elusimicrobiota.c__Endomicrobia.o__Endomicrobiales.f__Endomicrobiaceae                                                   | 0.525044807 |     |           | -        |
| d__Bacteria.p__Proteobacteria.c__Alphaproteobacteria.o__Rhizobiales.f__Rhizobiaceae.g__Aquamicrobium                                    | 0.791815575 |     |           | -        |
| d__Bacteria.p__Deferribacterota.c__Deferribacteres.o__Deferribacterales.f__Deferribacteraceae                                           | 2.440335489 |     |           | -        |
| d__Bacteria.p__Bacteroidota.c__Bacteroidia.o__Bacteroidales.f__Muribaculaceae.g__Muribaculum                                            | 1.440346743 |     |           | -        |
| d__Bacteria.p__Proteobacteria.c__Gammaproteobacteria.o__Pseudomonadales.f__Pseudomonadaceae.g__Pseudomonas                              | 3.716747211 | H   | 3.4197807 | 7.11E-29 |
| d__Bacteria.p__Bacteroidota.c__Bacteroidia.o__Sphingobacteriales.f__Lentimicrobiaceae                                                   | 2.522723612 | H   | 3.1331906 | 6.86E-20 |
| d__Bacteria.p__Proteobacteria.c__Alphaproteobacteria.o__Rhodospirillales.f__Rhodospirillales_uncultured                                 | 2.241848759 |     |           | -        |
| d__Bacteria.p__Proteobacteria.c__Gammaproteobacteria.o__Pseudomonadales.f__Moraxellaceae.g__Enhydrobacter                               | 1.190931691 |     |           | -        |
| d__Bacteria.p__Firmicutes.c__Clostridia.o__Lachnospirales.f__Lachnospiraceae.g__Lachnospiraceae_unclassified                            | 3.456591582 | H   | 3.1793748 | 8.84E-09 |
| d__Bacteria.p__Proteobacteria.c__Alphaproteobacteria.o__Rhodobacterales.f__Rhodobacteraceae.g__Paracoccus                               | 1.141673694 |     |           | -        |
| d__Bacteria.p__Bacteroidota.c__Bacteroidia.o__Bacteroidales.f__p_2534_18B5_gut_group                                                    | 1.108178297 |     |           | -        |
| d__Bacteria.p__Proteobacteria.c__Gammaproteobacteria.o__Burkholderiales.f__Chromobacteriaceae.g__Vogesella                              | 0           |     |           | -        |
| d__Bacteria.p__Firmicutes.c__Clostridia.o__Lachnospirales.f__Lachnospiraceae.g__ASF356                                                  | 1.70616893  |     |           | -        |
| d__Bacteria.p__Patiscibacteria.c__Gracilibacteria.o__Gracilibacteria.f__Gracilibacteria.g__Gracilibacteria                              | 2.73900693  |     |           | -        |
| d__Bacteria.p__Firmicutes.c__Bacilli.o__Bacillales.f__Bacillaceae.g__Anoxybacillus                                                      | 0           |     |           | -        |
| d__Bacteria.p__Fusobacteriota.c__Fusobacteriia.o__Fusobacteriales.f__Leptotrichiaceae.g__Leptotrichia                                   | 5.038733417 | CC  | 4.5302532 | 0.002275 |
| d__Bacteria.p__Bacteroidota.c__Bacteroidia.o__Sphingobacteriales                                                                        | 2.538412136 | H   | 3.4726561 | 4.39E-19 |
| d__Bacteria.p__Proteobacteria.c__Gammaproteobacteria.o__Oceanospirillales                                                               | 3.951764536 | CC  | 3.6185269 | 1.56E-10 |
| d__Bacteria.p__Firmicutes.c__Clostridia.o__Oscillospirales.f__Butyricocccaceae                                                          | 1.835418769 |     |           | -        |
| d__Bacteria.p__Proteobacteria.c__Gammaproteobacteria.o__Alteromonadales                                                                 | 1.766625268 |     |           | -        |
| d__Bacteria.p__Firmicutes.c__Bacilli.o__Lactobacillales.f__Lactobacillaceae.g__Lactobacillus                                            | 2.912157504 |     |           | -        |
| d__Bacteria.p__Firmicutes.c__Clostridia.o__Oscillospirales.f__Ruminococccaceae.g__Ruminococccaceae                                      | 0.392948063 |     |           | -        |
| d__Bacteria.p__Proteobacteria.c__Alphaproteobacteria.o__Rickettsiales.f__Mitochondria.g__Mitochondria                                   | 1.871556943 |     |           | -        |
| d__Bacteria.p__Firmicutes.c__Bacilli.o__Lactobacillales.f__Carnobacteriaceae.g__Atopostipes                                             | 0.784820995 |     |           | -        |
| d__Bacteria.p__Firmicutes.c__Clostridia.o__Peptostreptococcales_Tissierellales.f__Anaerovoracaceae.g__Amnipila                          | 2.588207659 |     |           | -        |
| d__Bacteria.p__Fusobacteriota.c__Fusobacteriia                                                                                          | 5.147631904 |     |           | -        |
| d__Bacteria.p__Proteobacteria.c__Alphaproteobacteria.o__Rhizobiales.f__Hyphomicrobiaceae.g__Pedomicrobium                               | 0.6734159   |     |           | -        |
| d__Bacteria.p__Cyanobacteria.c__Vampirivibronia.o__Gastranaerophilales.f__Gastranaerophilales                                           | 1.669715255 |     |           | -        |
| d__Bacteria.p__Firmicutes.c__Negativicutes.o__Veillonellales_Selenomonadales.f__Veillonellaceae.g__Dialister                            | 3.104331003 |     |           | -        |
| d__Bacteria.p__Proteobacteria.c__Gammaproteobacteria.o__Burkholderiales.f__Burkholderiales_unclassified.g__Burkholderiales_unclassified | 2.960744369 |     |           | -        |
| d__Bacteria.p__Patiscibacteria.c__Gracilibacteria.o__JGI_0000069_P22.f__JGI_0000069_P22.g__JGI_0000069_P22                              | 1.761175813 |     |           | -        |
| d__Bacteria.p__Proteobacteria.c__Alphaproteobacteria.o__Rhodobacterales                                                                 | 1.246920431 |     |           | -        |
| d__Bacteria.p__Firmicutes.c__Negativicutes.o__Acidaminococcales.f__Acidaminococccaceae                                                  | 2.6064044   | H   | 3.0378796 | 2.82E-09 |
| d__Bacteria.p__Firmicutes.c__Negativicutes.o__Veillonellales_Selenomonadales.f__Veillonellaceae                                         | 5.093579503 |     |           | -        |
| d__Bacteria.p__Cyanobacteria.c__Cyanobacteriia                                                                                          | 2.655493664 |     |           | -        |
| d__Bacteria.p__Proteobacteria.c__Alphaproteobacteria.o__Rhizobiales.f__Xanthobacteraceae.g__Xanthobacteraceae_unclassified              | 1.567110426 |     |           | -        |
| d__Bacteria.p__Firmicutes.c__Clostridia.o__Peptostreptococcales_Tissierellales.f__Peptostreptococccaceae.g__Peptostreptococccaceae      | 0.94094317  |     |           | -        |
| d__Bacteria.p__Firmicutes.c__Bacilli.o__Bacillales.f__Planococccaceae.g__Lysinibacillus                                                 | 0.280383226 |     |           | -        |
| d__Bacteria.p__Firmicutes.c__Negativicutes.o__Veillonellales_Selenomonadales.f__Veillonellaceae.g__Allisonella                          | 1.455606113 |     |           | -        |
| d__Bacteria.p__Firmicutes.c__Bacilli.o__Lactobacillales.f__Lactobacillaceae                                                             | 2.912506734 |     |           | -        |
| d__Bacteria.p__Firmicutes.c__Clostridia.o__Clostridia_UCG_014.f__Clostridia_UCG_014.g__Clostridia_UCG_014                               | 3.571943298 | H   | 3.2027096 | 4.61E-18 |
| d__Bacteria.p__Firmicutes.c__Clostridia.o__Lachnospirales.f__Lachnospiraceae                                                            | 4.550720391 | H   | 4.0927755 | 6.10E-13 |
| d__Bacteria.p__Proteobacteria.c__Gammaproteobacteria                                                                                    | 5.493755578 | CCR | 4.8473922 | 5.76E-06 |
| d__Bacteria.p__Proteobacteria.c__Gammaproteobacteria.o__Burkholderiales.f__Nitrosomonadaceae                                            | 0           |     |           | -        |
| d__Bacteria.p__Chloroflexi.c__Anaerolineae                                                                                              | 0.995635195 |     |           | -        |

|                                                                                             |             |  |  |   |
|---------------------------------------------------------------------------------------------|-------------|--|--|---|
| d__Bacteria.p__Cyanobacteria.c__Cyanobacteriia.o__Chloroplast.f__Chloroplast.g__Chloroplast | 2.655493664 |  |  | - |
| d__Bacteria.p__Deferribacterota.c__Deferribacteres.o__Deferribacterales                     | 2.440335489 |  |  | - |

**Supplementary table S21. The corresponding LDA value and p value of microbial community gene function for samples in the discovery cohort**

| Biomaker_names                                                                                                       | Logarithm value | Groups | LDA_value | P_value  |
|----------------------------------------------------------------------------------------------------------------------|-----------------|--------|-----------|----------|
| L1_Metabolism.L2_Glycan_biosynthesis_and_metabolism.L3_Glycosylphosphatidylinositol_GPI_anchor_biosynthesis          | 0.10374348      |        |           | -        |
| L1_Metabolism.L2_Lipid_metabolism.L3_Sphingolipid_metabolism                                                         | 3.43633711      |        |           | -        |
| L1_Metabolism.L2_Metabolism_of_cofactors_and_vitamins.L3_Riboflavin_metabolism                                       | 4.04641764      |        |           | -        |
| L1_Metabolism.L2_Nucleotide_metabolism.L3_Purine_metabolism                                                          | 4.00409323      |        |           | -        |
| L1_Metabolism.L2_Amino_acid_metabolism.L3_Cysteine_and_methionine_metabolism                                         | 4.17184063      |        |           | -        |
| L1_Metabolism.L2_Lipid_metabolism.L3_Fatty_acid_degradation                                                          | 3.59777962      |        |           | -        |
| L1_Environmental_Information_Processing.L2_Membrane_transport.L3_Bacterial_secretion_system                          | 4.05244459      |        |           | -        |
| L1_Metabolism.L2_Metabolism_of_cofactors_and_vitamins.L3_Porphyrin_and_chlorophyll_metabolism                        | 3.92652857      |        |           | -        |
| L1_Metabolism.L2_Biosynthesis_of_other_secondary_metabolites.L3_Penicillin_and_cephalosporin_biosynthesis            | 2.98786639      |        |           | -        |
| L1_Metabolism.L2_Xenobiotics_biodegradation_and_metabolism.L3_Drug_metabolism_other_enzymes                          | 4.11114927      | H      | 3.1958548 | 0.00088  |
| L1_Human_Diseases.L2_Neurodegenerative_diseases.L3_Alzheimer_s_disease                                               | 1.54985258      |        |           | -        |
| L1_Cellular_Processes.L2_Cell_growth_and_death.L3_Apoptosis                                                          | 2.75330921      |        |           | -        |
| L1_Metabolism.L2_Metabolism_of_terpenoids_and_polyketides.L3_Biosynthesis_of_siderophore_group_nonribosomal_peptides | 2.97814764      |        |           | -        |
| L1_Metabolism.L2_Amino_acid_metabolism.L3_Histidine_metabolism                                                       | 3.99309841      |        |           | -        |
| L1_Metabolism.L2_Amino_acid_metabolism.L3_Valine_leucine_and_isoleucine_degradation                                  | 3.65318755      |        |           | -        |
| L1_Metabolism.L2_Metabolism_of_terpenoids_and_polyketides.L3_Limonene_and_pinene_degradation                         | 2.9613178       |        |           | -        |
| L1_Metabolism.L2_Amino_acid_metabolism.L3_Glycine_serine_and_threonine_metabolism                                    | 4.06085294      |        |           | -        |
| L1_Metabolism.L2_Metabolism_of_terpenoids_and_polyketides.L3_Terpenoid_backbone_biosynthesis                         | 4.15337955      |        |           | -        |
| L1_Metabolism.L2_Glycan_biosynthesis_and_metabolism.L3_N_Glycan_biosynthesis                                         | 2.85019225      |        |           | -        |
| L1_Metabolism.L2_Carbohydrate_metabolism.L3_Propanoate_metabolism                                                    | 3.87401176      |        |           | -        |
| L1_Metabolism.L2_Lipid_metabolism.L3_Biosynthesis_of_unsaturated_fatty_acids                                         | 3.61816627      |        |           | -        |
| L1_Metabolism.L2_Biosynthesis_of_other_secondary_metabolites.L3_Betalain_biosynthesis                                | 1.52360667      |        |           | -        |
| L1_Genetic_Information_Processing.L2_Translation.L3_Aminoacyl_tRNA_biosynthesis                                      | 4.28392206      |        |           | -        |
| L1_Cellular_Processes.L2_Cell_growth_and_death.L3_Cell_cycle_Caulobacter                                             | 4.22504993      |        |           | -        |
| L1_Metabolism.L2_Xenobiotics_biodegradation_and_metabolism.L3_Xylene_degradation                                     | 2.41068797      |        |           | -        |
| L1_Metabolism.L2_Xenobiotics_biodegradation_and_metabolism.L3_Chlorocyclohexane_and_chlorobenzene_degradation        | 2.87822892      |        |           | -        |
| L1_Metabolism.L2_Metabolism_of_cofactors_and_vitamins.L3_Nicotinate_and_nicotinamide_metabolism                      | 4.09836819      |        |           | -        |
| L1_Metabolism.L2_Metabolism_of_other_amino_acids.L3_D_Alanine_metabolism                                             | 4.32418564      | CC     | 3.113352  | 9.77E-13 |
| L1_Metabolism.L2_Xenobiotics_biodegradation_and_metabolism.L3_Nitrotoluene_degradation                               | 3.29753609      |        |           | -        |
| L1_Cellular_Processes.L2_Transport_and_catabolism.L3_Lysosome                                                        | 1.13749196      |        |           | -        |
| L1_Metabolism.L2_Lipid_metabolism.L3_Steroid_hormone_biosynthesis                                                    | 2.30592472      |        |           | -        |
| L1_Metabolism.L2_Xenobiotics_biodegradation_and_metabolism.L3_Caprolactam_degradation                                | 2.56950466      |        |           | -        |
| L1_Metabolism.L2_Metabolism_of_terpenoids_and_polyketides.L3_Biosynthesis_of_type_II_polyketide_products             | 0               |        |           | -        |
| L1_Metabolism.L2_Metabolism_of_other_amino_acids.L3_Taurine_and_hypotaurine_metabolism                               | 3.89238978      |        |           | -        |
| L1_Cellular_Processes.L2_Cellular_community_eukaryotes.L3_Focal_adhesion                                             | 0.03960331      |        |           | -        |
| L1_Metabolism.L2_Metabolism_of_terpenoids_and_polyketides.L3_Zeatin_biosynthesis                                     | 3.9095623       |        |           | -        |
| L1_Genetic_Information_Processing.L2_Replication_and_repair.L3_DNA_replication                                       | 4.15243699      |        |           | -        |
| L1_Metabolism.L2_Biosynthesis_of_other_secondary_metabolites.L3_Flavonoid_biosynthesis                               | 2.54988711      |        |           | -        |
| L1_Environmental_Information_Processing.L2_Signal_transduction.L3_Plant_hormone_signal_transduction                  | 0               |        |           | -        |
| L1_Genetic_Information_Processing.L2_Translation.L3_Ribosome_biogenesis_in_eukaryotes                                | 2.91756701      |        |           | -        |
| L1_Environmental_Information_Processing.L2_Signal_transduction.L3_Two_component_system                               | 3.49088634      |        |           | -        |
| L1_Human_Diseases.L2_Infectious_diseases_Parasitic.L3_Toxoplasmosis                                                  | 0.64595511      |        |           | -        |
| L1_Metabolism.L2_Nucleotide_metabolism.L3_Pyrimidine_metabolism                                                      | 4.12319044      |        |           | -        |
| L1_Metabolism.L2_Amino_acid_metabolism.L3_Arginine_and_proline_metabolism                                            | 3.80765184      |        |           | -        |
| L1_Metabolism.L2_Carbohydrate_metabolism.L3_Pyruvate_metabolism                                                      | 4.12800448      |        |           | -        |
| L1_Metabolism.L2_Metabolism_of_cofactors_and_vitamins.L3_Folate_biosynthesis                                         | 4.19321737      |        |           | -        |
| L1_Metabolism.L2_Amino_acid_metabolism.L3_Valine_leucine_and_isoleucine_biosynthesis                                 | 4.35253881      | CCR    | 3.0062578 | 7.69E-15 |
| L1_Metabolism.L2_Xenobiotics_biodegradation_and_metabolism.L3_Fluorobenzoate_degradation                             | 2.34837859      |        |           | -        |
| L1_Cellular_Processes.L2_Transport_and_catabolism.L3_Endocytosis                                                     | 0               |        |           | -        |
| L1_Metabolism.L2_Xenobiotics_biodegradation_and_metabolism.L3_Dioxin_degradation                                     | 3.24004262      |        |           | -        |
| L1_Metabolism.L2_Amino_acid_metabolism.L3_Tyrosine_metabolism                                                        | 3.52173579      |        |           | -        |
| L1_Human_Diseases.L2_Infectious_diseases_Bacterial.L3_Vibrio_cholerae_infection                                      | 0.89894446      |        |           | -        |
| L1_Human_Diseases.L2_Infectious_diseases_Bacterial.L3_Bacterial_invasion_of_epithelial_cells                         | 1.64428818      |        |           | -        |
| L1_Metabolism.L2_Xenobiotics_biodegradation_and_metabolism.L3_Styrene_degradation                                    | 3.25790237      |        |           | -        |
| L1_Metabolism.L2_Metabolism_of_terpenoids_and_polyketides.L3_Geraniol_degradation                                    | 3.21600764      |        |           | -        |



|                                                                                                                       |            |     |           |          |
|-----------------------------------------------------------------------------------------------------------------------|------------|-----|-----------|----------|
| L1_Organismal_Systems.L2_Endocrine_system.L3_Insulin_signaling_pathway                                                | 2.99991042 |     |           | -        |
| L1_Metabolism.L2_Xenobiotics_biodegradation_and_metabolism.L3_Metabolism_of_xenobiotics_by_cytochrome_P450            | 1.79635426 |     |           | -        |
| L1_Metabolism.L2_Glycan_biosynthesis_and_metabolism.L3_Lipopolysaccharide_biosynthesis                                | 4.2585507  |     |           | -        |
| L1_Metabolism.L2_Biosynthesis_of_other_secondary_metabolites.L3_Tropane_piperidine_and_pyridine_alkaloid_biosynthesis | 3.6706811  |     |           | -        |
| L1_Metabolism.L2_Metabolism_of_cofactors_and_vitamins.L3_One_carbon_pool_by_folate                                    | 4.30554183 |     |           | -        |
| L1_Metabolism.L2_Energy_metabolism.L3_Methane_metabolism                                                              | 3.64916371 |     |           | -        |
| L1_Genetic_Information_Processing.L2_Replication_and_repair.L3_Homologous_recombination                               | 4.23478742 |     |           | -        |
| L1_Organismal_Systems.L2_Immune_system.L3_NOD_like_receptor_signaling_pathway                                         | 2.8573291  |     |           | -        |
| L1_Metabolism.L2_Metabolism_of_other_amino_acids.L3_D_Arginine_and_D_ornithine_metabolism                             | 3.59985331 |     |           | -        |
| L1_Genetic_Information_Processing.L2_Replication_and_repair.L3_Base_excision_repair                                   | 4.05183965 |     |           | -        |
| L1_Human_Diseases.L2_Immune_diseases.L3_Systemic_lupus_erythematosus                                                  | 2.27866085 |     |           | -        |
| L1_Metabolism.L2_Metabolism_of_terpenoids_and_polyketides.L3_Sesquiterpenoid_and_triterpenoid_biosynthesis            | 0          |     |           | -        |
| L1_Metabolism.L2_Carbohydrate_metabolism.L3_Pentose_phosphate_pathway                                                 | 4.21687123 |     |           | -        |
| L1_Metabolism.L2_Biosynthesis_of_other_secondary_metabolites.L3_Isoflavonoid_biosynthesis                             | 0          |     |           | -        |
| L1_Metabolism.L2_Amino_acid_metabolism.L3_Phenylalanine_metabolism                                                    | 3.46175527 |     |           | -        |
| L1_Metabolism.L2_Energy_metabolism.L3_Photosynthesis_antenna_proteins                                                 | 0.85220535 |     |           | -        |
| L1_Metabolism.L2_Metabolism_of_cofactors_and_vitamins.L3_Biotin_metabolism                                            | 4.18552056 |     |           | -        |
| L1_Genetic_Information_Processing.L2_Folding_sorting_and_degradation.L3_Protein_processing_in_endoplasmic_reticulum   | 2.48612904 |     |           | -        |
| L1_Genetic_Information_Processing.L2_Folding_sorting_and_degradation.L3_Proteasome                                    | 1.92768981 |     |           | -        |
| L1_Metabolism.L2_Amino_acid_metabolism.L3_Phenylalanine_tyrosine_and_tryptophan_biosynthesis                          | 4.12522668 |     |           | -        |
| L1_Metabolism.L2_Carbohydrate_metabolism.L3_C5_Branched_dibasic_acid_metabolism                                       | 4.27046549 | CCR | 3.1586659 | 7.44E-08 |
| L1_Metabolism.L2_Metabolism_of_terpenoids_and_polyketides.L3_Carotenoid_biosynthesis                                  | 2.57711223 |     |           | -        |
| L1_Metabolism.L2_Carbohydrate_metabolism.L3_Amino_sugar_and_nucleotide_sugar_metabolism                               | 4.03058418 |     |           | -        |
| L1_Organismal_Systems.L2_Digestive_system.L3_Protein_digestion_and_absorption                                         | 2.83601349 |     |           | -        |
| L1_Metabolism.L2_Energy_metabolism.L3_Sulfur_metabolism                                                               | 4.05218498 |     |           | -        |
| L1_Genetic_Information_Processing.L2_Translation.L3_RNA_transport                                                     | 2.70787929 |     |           | -        |
| L1_Metabolism.L2_Carbohydrate_metabolism.L3_Butanoate_metabolism                                                      | 3.87402066 |     |           | -        |
| L1_Metabolism.L2_Xenobiotics_biodegradation_and_metabolism.L3_Aminobenzoate_degradation                               | 3.21000319 |     |           | -        |
| L1_Metabolism.L2_Energy_metabolism.L3_Nitrogen_metabolism                                                             | 3.84934203 |     |           | -        |
| L1_Metabolism.L2_Metabolism_of_other_amino_acids.L3_Glutathione_metabolism                                            | 3.97241004 |     |           | -        |
| L1_Metabolism.L2_Energy_metabolism.L3_Carbon_fixation_in_photosynthetic_organisms                                     | 4.23715227 |     |           | -        |
| L1_Human_Diseases.L2_Infectious_diseases_Bacterial.L3_Staphylococcus_aureus_infection                                 | 2.92915503 |     |           | -        |
| L1_Metabolism.L2_Metabolism_of_cofactors_and_vitamins.L3_Vitamin_B6_metabolism                                        | 4.09218455 |     |           | -        |
| L1_Metabolism.L2_Xenobiotics_biodegradation_and_metabolism.L3_Bisphenol_degradation                                   | 2.94702404 |     |           | -        |
| L1_Metabolism.L2_Carbohydrate_metabolism.L3_Inositol_phosphate_metabolism                                             | 3.35399866 |     |           | -        |
| L1_Metabolism.L2_Metabolism_of_other_amino_acids.L3_D_Glutamine_and_D_glutamate_metabolism                            | 4.40068551 |     |           | -        |
| L1_Cellular_Processes.L2_Cell_growth_and_death.L3_Meiosis_yeast                                                       | 1.40514191 |     |           | -        |
| L1_Environmental_Information_Processing.L2_Membrane_transport.L3_ABC_transporters                                     | 3.92983403 |     |           | -        |
| L1_Cellular_Processes.L2_Cellular_community_prokaryotes.L3_Biofilm_formation_Vibrio_cholerae                          | 3.29048912 |     |           | -        |
| L1_Metabolism.L2_Lipid_metabolism.L3_Linoleic_acid_metabolism                                                         | 3.25278946 |     |           | -        |
| L1_Metabolism.L2_Glycan_biosynthesis_and_metabolism.L3_Peptidoglycan_biosynthesis                                     | 4.31597012 |     |           | -        |
| L1_Genetic_Information_Processing.L2_Folding_sorting_and_degradation.L3_Protein_export                                | 4.22485711 |     |           | -        |
| L1_Metabolism.L2_Glycan_biosynthesis_and_metabolism.L3_Other_types_of_O_glycan_biosynthesis                           | 1.23365699 |     |           | -        |
| L1_Metabolism.L2_Carbohydrate_metabolism.L3_Galactose_metabolism                                                      | 3.9405277  |     |           | -        |
| L1_Metabolism.L2_Xenobiotics_biodegradation_and_metabolism.L3_Toluene_degradation                                     | 3.3908055  |     |           | -        |
| L1_Genetic_Information_Processing.L2_Folding_sorting_and_degradation.L3_Sulfur_relay_system                           | 4.04340219 |     |           | -        |
| L1_Metabolism.L2_Metabolism_of_terpenoids_and_polyketides.L3_Biosynthesis_of_vancomycin_group_antibiotics             | 4.3545816  | H   | 3.2759562 | 7.57E-11 |
| L1_Human_Diseases.L2_Cardiovascular_diseases.L3_Hypertrophic_cardiomyopathy_HCM                                       | 1.00721888 |     |           | -        |
| L1_Metabolism.L2_Glycan_biosynthesis_and_metabolism.L3_Glycosphingolipid_biosynthesis_lacto_and_neolacto_series       | 0          |     |           | -        |
| L1_Genetic_Information_Processing.L2_Transcription.L3_RNA_polymerase                                                  | 3.92306834 |     |           | -        |
| L1_Metabolism.L2_Amino_acid_metabolism.L3_Alanine_aspartate_and_glutamate_metabolism                                  | 4.19179557 |     |           | -        |
| L1_Metabolism.L2_Xenobiotics_biodegradation_and_metabolism.L3_Benzoate_degradation                                    | 3.23274613 |     |           | -        |
| L1_Human_Diseases.L2_Infectious_diseases_Bacterial.L3_Shigellosis                                                     | 0          |     |           | -        |
| L1_Metabolism.L2_Carbohydrate_metabolism.L3_Glycolysis_Gluconeogenesis                                                | 4.08891763 |     |           | -        |
| L1_Metabolism.L2_Amino_acid_metabolism.L3_Lysine_biosynthesis                                                         | 4.21086544 |     |           | -        |
| L1_Metabolism.L2_Lipid_metabolism.L3_Synthesis_and_degradation_of_ketone_bodies                                       | 3.71599556 |     |           | -        |
| L1_Human_Diseases.L2_Infectious_diseases_Parasitic.L3_Chagas_disease_American_trypanosomiasis                         | 1.43437122 |     |           | -        |
| L1_Metabolism.L2_Energy_metabolism.L3_Oxidative_phosphorylation                                                       | 3.73935381 |     |           | -        |

|                                                                                                                  |            |     |           |          |
|------------------------------------------------------------------------------------------------------------------|------------|-----|-----------|----------|
| L1_Metabolism.L2_Metabolism_of_cofactors_and_vitamins.L3_Ubiquinone_and_other_terpenoid_quinone_biosynthesis     | 3.78556063 |     |           | -        |
| L1_Organismal_Systems.L2_Endocrine_system.L3_Renin_angiotensin_system                                            | 0          |     |           | -        |
| L1_Metabolism.L2_Energy_metabolism.L3_Carbon_fixation_pathways_in_prokaryotes                                    | 4.08214217 |     |           | -        |
| L1_Metabolism.L2_Xenobiotics_biodegradation_and_metabolism.L3_Ethylbenzene_degradation                           | 3.14691566 |     |           | -        |
| L1_Human_Diseases.L2_Infectious_diseases_Parasitic.L3_African_trypanosomiasis                                    | 1.93396169 |     |           | -        |
| L1_Metabolism.L2_Metabolism_of_other_amino_acids.L3_beta_Alanine_metabolism                                      | 3.71825834 | H   | 3.1440111 | 1.82E-15 |
| L1_Metabolism.L2_Lipid_metabolism.L3_Glycerophospholipid_metabolism                                              | 3.85058109 |     |           | -        |
| L1_Metabolism.L2_Carbohydrate_metabolism.L3_Fructose_and_mannose_metabolism                                      | 3.93648676 |     |           | -        |
| L1_Metabolism.L2_Lipid_metabolism.L3_Secondary_bile_acid_biosynthesis                                            | 3.06433509 |     |           | -        |
| L1_Metabolism.L2_Metabolism_of_other_amino_acids.L3_Cyanoamino_acid_metabolism                                   | 3.77046249 | H   | 3.2004351 | 2.39E-15 |
| L1_Genetic_Information_Processing.L2_Transcription.L3_Spliceosome                                                | 1.60489333 |     |           | -        |
| L1_Metabolism.L2_Lipid_metabolism.L3_Glycerolipid_metabolism                                                     | 3.66876723 |     |           | -        |
| L1_Metabolism.L2_Metabolism_of_other_amino_acids.L3_Phosphonate_and_phosphinate_metabolism                       | 3.35635647 |     |           | -        |
| L1_Genetic_Information_Processing.L2_Replication_and_repair.L3_Non_homologous_end_joining                        | 1.68489163 |     |           | -        |
| L1_Metabolism.L2_Lipid_metabolism.L3_Primary_bile_acid_biosynthesis                                              | 2.17833884 |     |           | -        |
| L1_Metabolism.L2_Biosynthesis_of_other_secondary_metabolites.L3_Streptomycin_biosynthesis                        | 4.19839342 | H   | 3.0919045 | 6.53E-06 |
| L1_Metabolism.L2_Carbohydrate_metabolism.L3_Glyoxylate_and_dicarboxylate_metabolism                              | 3.79477342 |     |           | -        |
| L1_Organismal_Systems.L2_Excretory_system.L3_Vasopressin_regulated_water_reabsorption                            | 0          |     |           | -        |
| L1_Cellular_Processes.L2_Cell_motility.L3_Flagellar_assembly                                                     | 3.34649629 |     |           | -        |
| L1_Metabolism.L2_Xenobiotics_biodegradation_and_metabolism.L3_Naphthalene_degradation                            | 2.75529622 |     |           | -        |
| L1_Metabolism.L2_Carbohydrate_metabolism.L3_Ascorbate_and_aldarate_metabolism                                    | 3.4572582  |     |           | -        |
| L1_Metabolism.L2_Xenobiotics_biodegradation_and_metabolism.L3_Chloroalkane_and_chloroalkene_degradation          | 3.40488094 |     |           | -        |
| L1_Cellular_Processes.L2_Cell_motility.L3_Bacterial_chemotaxis                                                   | 3.62349179 |     |           | -        |
| L1_Environmental_Information_Processing.L2_Membrane_transport.L3_Phosphotransferase_system_PTS                   | 3.81228899 | CCR | 3.1453603 | 5.84E-13 |
| L1_Metabolism.L2_Carbohydrate_metabolism.L3_Citrate_cycle_TCA_cycle                                              | 4.07651249 |     |           | -        |
| L1_Metabolism.L2_Metabolism_of_cofactors_and_vitamins.L3_Pantothenate_and_CoA_biosynthesis                       | 4.26367575 |     |           | -        |
| L1_Metabolism.L2_Lipid_metabolism.L3_Fatty_acid_biosynthesis                                                     | 4.33736666 | CCR | 3.2539548 | 2.85E-06 |
| L1_Cellular_Processes.L2_Transport_and_catabolism.L3_Peroxisome                                                  | 3.42748699 |     |           | -        |
| L1_Genetic_Information_Processing.L2_Replication_and_repair.L3_Nucleotide_excision_repair                        | 3.94420532 |     |           | -        |
| L1_Metabolism.L2_Lipid_metabolism.L3_Steroid_biosynthesis                                                        | 1.43445349 |     |           | -        |
| L1_Metabolism.L2_Glycan_biosynthesis_and_metabolism.L3_Glycosaminoglycan_degradation                             | 3.60320857 | H   | 3.0456583 | 7.67E-12 |
| L1_Metabolism.L2_Amino_acid_metabolism.L3_Tryptophan_metabolism                                                  | 3.3815422  |     |           | -        |
| L1_Metabolism.L2_Amino_acid_metabolism.L3_Lysine_degradation                                                     | 3.31862028 |     |           | -        |
| L1_Metabolism.L2_Metabolism_of_other_amino_acids.L3_Selenocompound_metabolism                                    | 4.10229403 |     |           | -        |
| L1_Human_Diseases.L2_Infectious_diseases_Bacterial.L3_Epithelial_cell_signaling_in_Helicobacter_pylori_infection | 3.18639429 |     |           | -        |
| L1_Metabolism.L2_Xenobiotics_biodegradation_and_metabolism.L3_Polycyclic_aromatic_hydrocarbon_degradation        | 1.65557526 |     |           | -        |
| L1_Metabolism.L2_Metabolism_of_cofactors_and_vitamins.L3_Lipoic_acid_metabolism                                  | 4.12209509 |     |           | -        |
| L1_Metabolism.L2_Carbohydrate_metabolism.L3_Starch_and_sucrose_metabolism                                        | 3.90887777 |     |           | -        |
| L1_Genetic_Information_Processing.L2_Translation.L3_Ribosome                                                     | 4.26029231 |     |           | -        |
| L1_Genetic_Information_Processing.L2_Folding_sorting_and_degradation.L3_RNA_degradation                          | 3.82641202 |     |           | -        |
| L1_Metabolism.L2_Metabolism_of_cofactors_and_vitamins.L3_Retinol_metabolism                                      | 2.99364274 |     |           | -        |
| L1_Genetic_Information_Processing.L2_Replication_and_repair.L3_Mismatch_repair                                   | 4.28080036 |     |           | -        |
| L1_Metabolism.L2_Xenobiotics_biodegradation_and_metabolism.L3_Atrazine_degradation                               | 2.45615916 |     |           | -        |
| L1_Organismal_Systems.L2_Environmental_adaptation.L3_Plant_pathogen_interaction                                  | 3.26167777 |     |           | -        |
| L1_Metabolism.L2_Metabolism_of_terpenoids_and_polyketides.L3_Biosynthesis_of_ansamycins                          | 4.63333255 | CC  | 3.4586554 | 0.00078  |
| L1_Metabolism.L2_Metabolism_of_terpenoids_and_polyketides.L3_Biosynthesis_of_type_II_polyketide_backbone         | 0          |     |           | -        |
| L1_Metabolism.L2_Energy_metabolism.L3_Photosynthesis                                                             | 3.38610868 |     |           | -        |
| L1_Metabolism.L2_Glycan_biosynthesis_and_metabolism.L3_Various_types_of_N_glycan_biosynthesis                    | 0          |     |           | -        |
| L1_Metabolism.L2_Glycan_biosynthesis_and_metabolism.L3_Other_glycan_degradation                                  | 4.03870185 | H   | 3.3735842 | 1.82E-08 |
| L1_Metabolism.L2_Metabolism_of_cofactors_and_vitamins.L3_Thiamine_metabolism                                     | 4.18168003 |     |           | -        |
| L1_Human_Diseases.L2_Infectious_diseases_Parasitic.L3_Amoebiasis                                                 | 1.98211611 |     |           | -        |
| L1_Metabolism.L2_Carbohydrate_metabolism.L3_Pentose_and_glucuronate_interconversions                             | 3.53497604 |     |           | -        |

| Supplementary table S22. The p value between 44 oropharyngeal OTUs and 11 clinical indicators of CC (n=48) and H (n=94) obtained by spearman correlation analysis. |    |     |      |      |                                          |              |             |      |         |      |
|--------------------------------------------------------------------------------------------------------------------------------------------------------------------|----|-----|------|------|------------------------------------------|--------------|-------------|------|---------|------|
| x                                                                                                                                                                  | y  | grp | subx | suby | Genus                                    | rho          | p           | lcol | lwd     | rank |
| -0.5                                                                                                                                                               | 44 | RBC | -10  | 41   | OTU599 (Burkholderiales_unclassified)    | 0.046946656  | 0.579034644 | 0    | #FF8E8A | 0    |
| 0.5                                                                                                                                                                | 43 | RBC | -10  | 41   | OTU744 (Leptotrichia)                    | 0.01441396   | 0.864811289 | 0    | #FF8E8A | 0    |
| 1.5                                                                                                                                                                | 42 | RBC | -10  | 41   | OTU658 (P5D1-392)                        | 0.029156037  | 0.730517916 | 0    | #FF8E8A | 0    |
| 2.5                                                                                                                                                                | 41 | RBC | -10  | 41   | OTU796 (Rothia)                          | 0.038621488  | 0.648152223 | 0    | #FF8E8A | 0    |
| 3.5                                                                                                                                                                | 40 | RBC | -10  | 41   | OTU748 (Leptotrichia)                    | 0.016238997  | 0.847889267 | 0    | #FF8E8A | 0    |
| 4.5                                                                                                                                                                | 39 | RBC | -10  | 41   | OTU762 (Streptococcus)                   | -0.026679405 | 0.752634172 | 0    | #00CCCC | 0    |
| 5.5                                                                                                                                                                | 38 | RBC | -10  | 41   | OTU34 (Halomonas)                        | -0.193708834 | 0.020897692 | 1    | #00CCCC | 1    |
| 6.5                                                                                                                                                                | 37 | RBC | -10  | 41   | OTU1 (Streptococcus)                     | -0.123581942 | 0.142851229 | 0    | #00CCCC | 1    |
| 7.5                                                                                                                                                                | 36 | RBC | -10  | 41   | OTU126 ([Eubacterium]_ruminantium_group) | 0.026298906  | 0.756050401 | 0    | #FF8E8A | 0    |
| 8.5                                                                                                                                                                | 35 | RBC | -10  | 41   | OTU82 (Faecalibacterium)                 | -0.056596018 | 0.503498719 | 0    | #00CCCC | 0    |
| 9.5                                                                                                                                                                | 34 | RBC | -10  | 41   | OTU69 (Fusicatenibacter)                 | -0.035455457 | 0.675290721 | 0    | #00CCCC | 0    |
| 10.5                                                                                                                                                               | 33 | RBC | -10  | 41   | OTU85 (Prevotella)                       | -0.021464004 | 0.79984969  | 0    | #00CCCC | 0    |
| 11.5                                                                                                                                                               | 32 | RBC | -10  | 41   | OTU252 (Prevotella)                      | -0.015663121 | 0.853221779 | 0    | #00CCCC | 0    |
| 12.5                                                                                                                                                               | 31 | RBC | -10  | 41   | OTU129 (Acinetobacter)                   | -0.012789843 | 0.879922347 | 0    | #00CCCC | 0    |
| 13.5                                                                                                                                                               | 30 | RBC | -10  | 41   | OTU31 (Pseudomonas)                      | 0.066096153  | 0.434496653 | 0    | #FF8E8A | 0    |
| 14.5                                                                                                                                                               | 29 | RBC | -10  | 41   | OTU15 (Campylobacter)                    | 0.002243539  | 0.978859666 | 0    | #FF8E8A | 0    |
| 15.5                                                                                                                                                               | 28 | RBC | -10  | 41   | OTU87 (Corynebacterium)                  | -0.020918324 | 0.804835156 | 0    | #00CCCC | 0    |
| 16.5                                                                                                                                                               | 27 | RBC | -10  | 41   | OTU114 (Prevotella)                      | 0.140170214  | 0.096156007 | 0    | #FF8E8A | 1    |
| 17.5                                                                                                                                                               | 26 | RBC | -10  | 41   | OTU172 (Prevotella)                      | 0.110161027  | 0.191861072 | 0    | #FF8E8A | 1    |
| 18.5                                                                                                                                                               | 25 | RBC | -10  | 41   | OTU119 (Prevotella)                      | 0.08643828   | 0.306382223 | 0    | #FF8E8A | 0    |
| 19.5                                                                                                                                                               | 24 | RBC | -10  | 41   | OTU5 (Haemophilus)                       | 0.083611199  | 0.322531272 | 0    | #FF8E8A | 0    |
| 20.5                                                                                                                                                               | 23 | RBC | -10  | 41   | OTU171 (Aggregatibacter)                 | 0.05987883   | 0.479027609 | 0    | #FF8E8A | 0    |
| 21.5                                                                                                                                                               | 22 | RBC | -10  | 41   | OTU39 (Haemophilus)                      | 0.048990233  | 0.562606768 | 0    | #FF8E8A | 0    |
| 22.5                                                                                                                                                               | 21 | RBC | -10  | 41   | OTU20 (Actinobacillus)                   | 0.023513247  | 0.781200782 | 0    | #FF8E8A | 0    |
| 23.5                                                                                                                                                               | 20 | RBC | -10  | 41   | OTU10 (Alloprevotella)                   | 0.053646722  | 0.526027981 | 0    | #FF8E8A | 0    |
| 24.5                                                                                                                                                               | 19 | RBC | -10  | 41   | OTU26 (Prevotella)                       | 0.091140684  | 0.280715215 | 0    | #FF8E8A | 0    |
| 25.5                                                                                                                                                               | 18 | RBC | -10  | 41   | OTU71 (Alloprevotella)                   | 0.12341616   | 0.14339223  | 0    | #FF8E8A | 1    |
| 26.5                                                                                                                                                               | 17 | RBC | -10  | 41   | OTU46 (g_Absconditabacteriales_)         | 0.110010664  | 0.192472005 | 0    | #FF8E8A | 1    |
| 27.5                                                                                                                                                               | 16 | RBC | -10  | 41   | OTU9 (Porphyromonas)                     | 0.087369027  | 0.301183597 | 0    | #FF8E8A | 0    |
| 28.5                                                                                                                                                               | 15 | RBC | -10  | 41   | OTU62 (Aggregatibacter)                  | 0.095708724  | 0.257204307 | 0    | #FF8E8A | 0    |
| 29.5                                                                                                                                                               | 14 | RBC | -10  | 41   | OTU57 (Parvimonas)                       | 0.039441449  | 0.641196639 | 0    | #FF8E8A | 0    |
| 30.5                                                                                                                                                               | 13 | RBC | -10  | 41   | OTU45 (Alloprevotella)                   | 0.0567808    | 0.502104167 | 0    | #FF8E8A | 0    |
| 31.5                                                                                                                                                               | 12 | RBC | -10  | 41   | OTU67 (Alloprevotella)                   | 0.105179898  | 0.212858536 | 0    | #FF8E8A | 1    |
| 32.5                                                                                                                                                               | 11 | RBC | -10  | 41   | OTU29 (Porphyromonas)                    | 0.108117111  | 0.200286977 | 0    | #FF8E8A | 1    |
| 33.5                                                                                                                                                               | 10 | RBC | -10  | 41   | OTU365 (Fusobacterium)                   | 0.133766639  | 0.112497777 | 0    | #FF8E8A | 1    |
| 34.5                                                                                                                                                               | 9  | RBC | -10  | 41   | OTU169 (Treponema)                       | 0.106819036  | 0.205775104 | 0    | #FF8E8A | 1    |
| 35.5                                                                                                                                                               | 8  | RBC | -10  | 41   | OTU42 (g_Absconditabacteriales_)         | 0.025483736  | 0.763385069 | 0    | #FF8E8A | 0    |
| 36.5                                                                                                                                                               | 7  | RBC | -10  | 41   | OTU380 (Porphyromonas)                   | 0.132308599  | 0.116505357 | 0    | #FF8E8A | 1    |
| 37.5                                                                                                                                                               | 6  | RBC | -10  | 41   | OTU678 (Neisseria)                       | 0.0592316    | 0.483800839 | 0    | #FF8E8A | 0    |
| 38.5                                                                                                                                                               | 5  | RBC | -10  | 41   | OTU75 (Porphyromonas)                    | 0.130637256  | 0.121234728 | 0    | #FF8E8A | 1    |
| 39.5                                                                                                                                                               | 4  | RBC | -10  | 41   | OTU134 (Prevotella)                      | 0.105158229  | 0.21295333  | 0    | #FF8E8A | 1    |
| 40.5                                                                                                                                                               | 3  | RBC | -10  | 41   | OTU2 (Fusobacterium)                     | 0.151244161  | 0.072382832 | 0    | #FF8E8A | 1    |
| 41.5                                                                                                                                                               | 2  | RBC | -10  | 41   | OTU523 (Prevotella)                      | 0.034450237  | 0.683997455 | 0    | #FF8E8A | 0    |
| 42.5                                                                                                                                                               | 1  | RBC | -10  | 41   | OTU4 (Prevotella)                        | 0.069609284  | 0.410418226 | 0    | #FF8E8A | 0    |
| -0.5                                                                                                                                                               | 44 | WBC | -9   | 37   | OTU599 (Burkholderiales_unclassified)    | 0.10364808   | 0.219634069 | 0    | #FF8E8A | 1    |
| 0.5                                                                                                                                                                | 43 | WBC | -9   | 37   | OTU744 (Leptotrichia)                    | -0.04481834  | 0.596376872 | 0    | #00CCCC | 0    |
| 1.5                                                                                                                                                                | 42 | WBC | -9   | 37   | OTU658 (P5D1-392)                        | 0.023645633  | 0.78000016  | 0    | #FF8E8A | 0    |
| 2.5                                                                                                                                                                | 41 | WBC | -9   | 37   | OTU796 (Rothia)                          | -0.012550401 | 0.882153959 | 0    | #00CCCC | 0    |
| 3.5                                                                                                                                                                | 40 | WBC | -9   | 37   | OTU748 (Leptotrichia)                    | -0.083878901 | 0.320978964 | 0    | #00CCCC | 0    |
| 4.5                                                                                                                                                                | 39 | WBC | -9   | 37   | OTU762 (Streptococcus)                   | -0.063371392 | 0.453714841 | 0    | #00CCCC | 0    |
| 5.5                                                                                                                                                                | 38 | WBC | -9   | 37   | OTU34 (Halomonas)                        | 0.044124281  | 0.602082464 | 0    | #FF8E8A | 0    |
| 6.5                                                                                                                                                                | 37 | WBC | -9   | 37   | OTU1 (Streptococcus)                     | 0.09849543   | 0.243544699 | 0    | #FF8E8A | 0    |
| 7.5                                                                                                                                                                | 36 | WBC | -9   | 37   | OTU126 ([Eubacterium]_ruminantium_group) | 0.031040111  | 0.713839295 | 0    | #FF8E8A | 0    |
| 8.5                                                                                                                                                                | 35 | WBC | -9   | 37   | OTU82 (Faecalibacterium)                 | 0.021070719  | 0.803442041 | 0    | #FF8E8A | 0    |
| 9.5                                                                                                                                                                | 34 | WBC | -9   | 37   | OTU69 (Fusicatenibacter)                 | 0.06206207   | 0.463115786 | 0    | #FF8E8A | 0    |

|      |    |      |    |    |                                          |              |             |   |         |   |
|------|----|------|----|----|------------------------------------------|--------------|-------------|---|---------|---|
| 10.5 | 33 | WBC  | -9 | 37 | OTU85 (Prevotella)                       | 0.10399282   | 0.218096026 | 0 | #FF8E8A | 1 |
| 11.5 | 32 | WBC  | -9 | 37 | OTU252 (Prevotella)                      | 0.07898686   | 0.350108609 | 0 | #FF8E8A | 0 |
| 12.5 | 31 | WBC  | -9 | 37 | OTU129 (Acinetobacter)                   | 0.047473461  | 0.574778512 | 0 | #FF8E8A | 0 |
| 13.5 | 30 | WBC  | -9 | 37 | OTU31 (Pseudomonas)                      | 0.083284732  | 0.324430887 | 0 | #FF8E8A | 0 |
| 14.5 | 29 | WBC  | -9 | 37 | OTU15 (Campylobacter)                    | -0.003847617 | 0.963752963 | 0 | #00CCCC | 0 |
| 15.5 | 28 | WBC  | -9 | 37 | OTU87 (Corynebacterium)                  | 0.021749483  | 0.797244679 | 0 | #FF8E8A | 0 |
| 16.5 | 27 | WBC  | -9 | 37 | OTU114 (Prevotella)                      | 0.124483858  | 0.139935097 | 0 | #FF8E8A | 1 |
| 17.5 | 26 | WBC  | -9 | 37 | OTU172 (Prevotella)                      | 0.126761297  | 0.132773329 | 0 | #FF8E8A | 1 |
| 18.5 | 25 | WBC  | -9 | 37 | OTU119 (Prevotella)                      | 0.134524491  | 0.110457641 | 0 | #FF8E8A | 1 |
| 19.5 | 24 | WBC  | -9 | 37 | OTU5 (Haemophilus)                       | 0.074737075  | 0.376717572 | 0 | #FF8E8A | 0 |
| 20.5 | 23 | WBC  | -9 | 37 | OTU171 (Aggregatibacter)                 | 0.060434928  | 0.47494687  | 0 | #FF8E8A | 0 |
| 21.5 | 22 | WBC  | -9 | 37 | OTU39 (Haemophilus)                      | 0.059017155  | 0.485387952 | 0 | #FF8E8A | 0 |
| 22.5 | 21 | WBC  | -9 | 37 | OTU20 (Actinobacillus)                   | -0.007896019 | 0.92569564  | 0 | #00CCCC | 0 |
| 23.5 | 20 | WBC  | -9 | 37 | OTU10 (Alloprevotella)                   | 0.120522915  | 0.153085961 | 0 | #FF8E8A | 1 |
| 24.5 | 19 | WBC  | -9 | 37 | OTU26 (Prevotella)                       | 0.077676088  | 0.35818692  | 0 | #FF8E8A | 0 |
| 25.5 | 18 | WBC  | -9 | 37 | OTU71 (Alloprevotella)                   | 0.038847094  | 0.646235384 | 0 | #FF8E8A | 0 |
| 26.5 | 17 | WBC  | -9 | 37 | OTU46 (g__Absconditabacteriales_)        | 0.120757956  | 0.152280519 | 0 | #FF8E8A | 1 |
| 27.5 | 16 | WBC  | -9 | 37 | OTU9 (Porphyromonas)                     | 0.093695448  | 0.267394193 | 0 | #FF8E8A | 0 |
| 28.5 | 15 | WBC  | -9 | 37 | OTU62 (Aggregatibacter)                  | 0.193528696  | 0.021019269 | 1 | #FF8E8A | 1 |
| 29.5 | 14 | WBC  | -9 | 37 | OTU57 (Parvimonas)                       | 0.252299692  | 0.002452961 | 1 | #FF8E8A | 2 |
| 30.5 | 13 | WBC  | -9 | 37 | OTU45 (Alloprevotella)                   | 0.163388748  | 0.052031926 | 0 | #FF8E8A | 1 |
| 31.5 | 12 | WBC  | -9 | 37 | OTU67 (Alloprevotella)                   | 0.142701108  | 0.090240295 | 0 | #FF8E8A | 1 |
| 32.5 | 11 | WBC  | -9 | 37 | OTU29 (Porphyromonas)                    | 0.237115397  | 0.004494168 | 1 | #FF8E8A | 2 |
| 33.5 | 10 | WBC  | -9 | 37 | OTU365 (Fusobacterium)                   | 0.19078358   | 0.022948797 | 1 | #FF8E8A | 1 |
| 34.5 | 9  | WBC  | -9 | 37 | OTU169 (Treponema)                       | 0.15224078   | 0.070500494 | 0 | #FF8E8A | 1 |
| 35.5 | 8  | WBC  | -9 | 37 | OTU42 (g__Absconditabacteriales_)        | 0.127714184  | 0.129861506 | 0 | #FF8E8A | 1 |
| 36.5 | 7  | WBC  | -9 | 37 | OTU380 (Porphyromonas)                   | 0.153847123  | 0.067550328 | 0 | #FF8E8A | 1 |
| 37.5 | 6  | WBC  | -9 | 37 | OTU678 (Neisseria)                       | 0.071091837  | 0.400497131 | 0 | #FF8E8A | 0 |
| 38.5 | 5  | WBC  | -9 | 37 | OTU75 (Porphyromonas)                    | 0.148349613  | 0.078081564 | 0 | #FF8E8A | 1 |
| 39.5 | 4  | WBC  | -9 | 37 | OTU134 (Prevotella)                      | 0.189004809  | 0.024278756 | 1 | #FF8E8A | 1 |
| 40.5 | 3  | WBC  | -9 | 37 | OTU2 (Fusobacterium)                     | 0.12236695   | 0.146852266 | 0 | #FF8E8A | 1 |
| 41.5 | 2  | WBC  | -9 | 37 | OTU523 (Prevotella)                      | 0.029120771  | 0.730831344 | 0 | #FF8E8A | 0 |
| 42.5 | 1  | WBC  | -9 | 37 | OTU4 (Prevotella)                        | 0.015836808  | 0.851612758 | 0 | #FF8E8A | 0 |
| -0.5 | 44 | NEUT | -8 | 33 | OTU599 (Burkholderiales_unclassified)    | 0.209924443  | 0.012161164 | 1 | #FF8E8A | 2 |
| 0.5  | 43 | NEUT | -8 | 33 | OTU744 (Leptotrichia)                    | 0.087655691  | 0.29959423  | 0 | #FF8E8A | 0 |
| 1.5  | 42 | NEUT | -8 | 33 | OTU658 (P5D1-392)                        | 0.167300886  | 0.046585645 | 1 | #FF8E8A | 1 |
| 2.5  | 41 | NEUT | -8 | 33 | OTU796 (Rothia)                          | 0.082663913  | 0.328063088 | 0 | #FF8E8A | 0 |
| 3.5  | 40 | NEUT | -8 | 33 | OTU748 (Leptotrichia)                    | 0.08751598   | 0.300368146 | 0 | #FF8E8A | 0 |
| 4.5  | 39 | NEUT | -8 | 33 | OTU762 (Streptococcus)                   | 0.083222557  | 0.324793484 | 0 | #FF8E8A | 0 |
| 5.5  | 38 | NEUT | -8 | 33 | OTU34 (Halomonas)                        | 0.14039873   | 0.095609576 | 0 | #FF8E8A | 1 |
| 6.5  | 37 | NEUT | -8 | 33 | OTU1 (Streptococcus)                     | 0.106449727  | 0.207356072 | 0 | #FF8E8A | 1 |
| 7.5  | 36 | NEUT | -8 | 33 | OTU126 ([Eubacterium] ruminantium_group) | -0.148161563 | 0.078463953 | 0 | #00CCCC | 1 |
| 8.5  | 35 | NEUT | -8 | 33 | OTU82 (Faecalibacterium)                 | -0.121895684 | 0.148426788 | 0 | #00CCCC | 1 |
| 9.5  | 34 | NEUT | -8 | 33 | OTU69 (Fusicatenibacter)                 | -0.109159824 | 0.195955667 | 0 | #00CCCC | 1 |
| 10.5 | 33 | NEUT | -8 | 33 | OTU85 (Prevotella)                       | -0.078176698 | 0.355088059 | 0 | #00CCCC | 0 |
| 11.5 | 32 | NEUT | -8 | 33 | OTU252 (Prevotella)                      | -0.135509457 | 0.107849449 | 0 | #00CCCC | 1 |
| 12.5 | 31 | NEUT | -8 | 33 | OTU129 (Acinetobacter)                   | -0.109698352 | 0.19374546  | 0 | #00CCCC | 1 |
| 13.5 | 30 | NEUT | -8 | 33 | OTU31 (Pseudomonas)                      | -0.197499089 | 0.018476591 | 1 | #00CCCC | 1 |
| 14.5 | 29 | NEUT | -8 | 33 | OTU15 (Campylobacter)                    | -0.16548822  | 0.049047068 | 1 | #00CCCC | 1 |
| 15.5 | 28 | NEUT | -8 | 33 | OTU87 (Corynebacterium)                  | -0.169373633 | 0.043897979 | 1 | #00CCCC | 1 |
| 16.5 | 27 | NEUT | -8 | 33 | OTU114 (Prevotella)                      | -0.021585325 | 0.798742359 | 0 | #00CCCC | 0 |
| 17.5 | 26 | NEUT | -8 | 33 | OTU172 (Prevotella)                      | 0.014327194  | 0.865617389 | 0 | #FF8E8A | 0 |
| 18.5 | 25 | NEUT | -8 | 33 | OTU119 (Prevotella)                      | -0.035151332 | 0.677920439 | 0 | #00CCCC | 0 |
| 19.5 | 24 | NEUT | -8 | 33 | OTU5 (Haemophilus)                       | -0.14818424  | 0.078417761 | 0 | #00CCCC | 1 |
| 20.5 | 23 | NEUT | -8 | 33 | OTU171 (Aggregatibacter)                 | -0.168365054 | 0.045189139 | 1 | #00CCCC | 1 |
| 21.5 | 22 | NEUT | -8 | 33 | OTU39 (Haemophilus)                      | -0.125234239 | 0.137543632 | 0 | #00CCCC | 1 |
| 22.5 | 21 | NEUT | -8 | 33 | OTU20 (Actinobacillus)                   | -0.204233948 | 0.01476992  | 1 | #00CCCC | 2 |
| 23.5 | 20 | NEUT | -8 | 33 | OTU10 (Alloprevotella)                   | -0.179727711 | 0.032335979 | 1 | #00CCCC | 1 |

|      |    |      |    |    |                                          |              |             |   |         |   |
|------|----|------|----|----|------------------------------------------|--------------|-------------|---|---------|---|
| 24.5 | 19 | NEUT | -8 | 33 | OTU26 (Prevotella)                       | -0.171293129 | 0.041525753 | 1 | #00CCCC | 1 |
| 25.5 | 18 | NEUT | -8 | 33 | OTU71 (Alloprevotella)                   | -0.177441734 | 0.034637817 | 1 | #00CCCC | 1 |
| 26.5 | 17 | NEUT | -8 | 33 | OTU46 (g__Absconditabacteriales_)        | -0.08053735  | 0.340701803 | 0 | #00CCCC | 0 |
| 27.5 | 16 | NEUT | -8 | 33 | OTU9 (Porphyromonas)                     | 0.036369733  | 0.667408818 | 0 | #FF8E8A | 0 |
| 28.5 | 15 | NEUT | -8 | 33 | OTU62 (Aggregatibacter)                  | -0.037664639 | 0.656307536 | 0 | #00CCCC | 0 |
| 29.5 | 14 | NEUT | -8 | 33 | OTU57 (Parvimonas)                       | 0.056727442  | 0.50250665  | 0 | #FF8E8A | 0 |
| 30.5 | 13 | NEUT | -8 | 33 | OTU45 (Alloprevotella)                   | -0.06606376  | 0.434722364 | 0 | #00CCCC | 0 |
| 31.5 | 12 | NEUT | -8 | 33 | OTU67 (Alloprevotella)                   | -0.017382572 | 0.837320602 | 0 | #00CCCC | 0 |
| 32.5 | 11 | NEUT | -8 | 33 | OTU29 (Porphyromonas)                    | -0.00286266  | 0.973027793 | 0 | #00CCCC | 0 |
| 33.5 | 10 | NEUT | -8 | 33 | OTU365 (Fusobacterium)                   | 0.02759876   | 0.744399793 | 0 | #FF8E8A | 0 |
| 34.5 | 9  | NEUT | -8 | 33 | OTU169 (Treponema)                       | -0.072491308 | 0.391264099 | 0 | #00CCCC | 0 |
| 35.5 | 8  | NEUT | -8 | 33 | OTU42 (g__Absconditabacteriales_)        | -0.075018519 | 0.374918134 | 0 | #00CCCC | 0 |
| 36.5 | 7  | NEUT | -8 | 33 | OTU380 (Porphyromonas)                   | 0.089727427  | 0.288272545 | 0 | #FF8E8A | 0 |
| 37.5 | 6  | NEUT | -8 | 33 | OTU678 (Neisseria)                       | -0.095035259 | 0.260582842 | 0 | #00CCCC | 0 |
| 38.5 | 5  | NEUT | -8 | 33 | OTU75 (Porphyromonas)                    | 0.085569805  | 0.311285766 | 0 | #FF8E8A | 0 |
| 39.5 | 4  | NEUT | -8 | 33 | OTU134 (Prevotella)                      | 0.013767219  | 0.870823138 | 0 | #FF8E8A | 0 |
| 40.5 | 3  | NEUT | -8 | 33 | OTU2 (Fusobacterium)                     | 0.011224205  | 0.894530433 | 0 | #FF8E8A | 0 |
| 41.5 | 2  | NEUT | -8 | 33 | OTU523 (Prevotella)                      | -0.119238052 | 0.157545697 | 0 | #00CCCC | 1 |
| 42.5 | 1  | NEUT | -8 | 33 | OTU4 (Prevotella)                        | -0.128751443 | 0.126747874 | 0 | #00CCCC | 1 |
| -0.5 | 44 | LYMP | -7 | 29 | OTU599 (Burkholderiales_unclassified)    | -0.026740908 | 0.752082425 | 0 | #00CCCC | 0 |
| 0.5  | 43 | LYMP | -7 | 29 | OTU744 (Leptotrichia)                    | -0.089185739 | 0.291204848 | 0 | #00CCCC | 0 |
| 1.5  | 42 | LYMP | -7 | 29 | OTU658 (P5D1-392)                        | -0.180326902 | 0.031754537 | 1 | #00CCCC | 1 |
| 2.5  | 41 | LYMP | -7 | 29 | OTU796 (Rothia)                          | -0.164619709 | 0.050264141 | 0 | #00CCCC | 1 |
| 3.5  | 40 | LYMP | -7 | 29 | OTU748 (Leptotrichia)                    | -0.20248822  | 0.015662424 | 1 | #00CCCC | 2 |
| 4.5  | 39 | LYMP | -7 | 29 | OTU762 (Streptococcus)                   | -0.19784073  | 0.018270801 | 1 | #00CCCC | 1 |
| 5.5  | 38 | LYMP | -7 | 29 | OTU34 (Halomonas)                        | -0.138667061 | 0.099812242 | 0 | #00CCCC | 1 |
| 6.5  | 37 | LYMP | -7 | 29 | OTU1 (Streptococcus)                     | 0.024585689  | 0.771489807 | 0 | #FF8E8A | 0 |
| 7.5  | 36 | LYMP | -7 | 29 | OTU126 ([Eubacterium]_ruminantium_group) | 0.153866342  | 0.067515648 | 0 | #FF8E8A | 1 |
| 8.5  | 35 | LYMP | -7 | 29 | OTU82 (Faecalibacterium)                 | 0.116536649  | 0.167238719 | 0 | #FF8E8A | 1 |
| 9.5  | 34 | LYMP | -7 | 29 | OTU69 (Fusicatenibacter)                 | 0.115092099  | 0.172600489 | 0 | #FF8E8A | 1 |
| 10.5 | 33 | LYMP | -7 | 29 | OTU85 (Prevotella)                       | 0.149124378  | 0.076521929 | 0 | #FF8E8A | 1 |
| 11.5 | 32 | LYMP | -7 | 29 | OTU252 (Prevotella)                      | 0.183931223  | 0.02844092  | 1 | #FF8E8A | 1 |
| 12.5 | 31 | LYMP | -7 | 29 | OTU129 (Acinetobacter)                   | 0.228263228  | 0.00629137  | 1 | #FF8E8A | 2 |
| 13.5 | 30 | LYMP | -7 | 29 | OTU31 (Pseudomonas)                      | 0.253001969  | 0.002383114 | 1 | #FF8E8A | 2 |
| 14.5 | 29 | LYMP | -7 | 29 | OTU15 (Campylobacter)                    | 0.047470746  | 0.574800413 | 0 | #FF8E8A | 0 |
| 15.5 | 28 | LYMP | -7 | 29 | OTU87 (Corynebacterium)                  | 0.102711311  | 0.223852285 | 0 | #FF8E8A | 1 |
| 16.5 | 27 | LYMP | -7 | 29 | OTU114 (Prevotella)                      | 0.118600712  | 0.159793703 | 0 | #FF8E8A | 1 |
| 17.5 | 26 | LYMP | -7 | 29 | OTU172 (Prevotella)                      | 0.174892831  | 0.03736616  | 1 | #FF8E8A | 1 |
| 18.5 | 25 | LYMP | -7 | 29 | OTU119 (Prevotella)                      | 0.209877797  | 0.012180789 | 1 | #FF8E8A | 2 |
| 19.5 | 24 | LYMP | -7 | 29 | OTU5 (Haemophilus)                       | 0.222023589  | 0.007917663 | 1 | #FF8E8A | 2 |
| 20.5 | 23 | LYMP | -7 | 29 | OTU171 (Aggregatibacter)                 | 0.169740509  | 0.043436021 | 1 | #FF8E8A | 1 |
| 21.5 | 22 | LYMP | -7 | 29 | OTU39 (Haemophilus)                      | 0.171927533  | 0.040765723 | 1 | #FF8E8A | 1 |
| 22.5 | 21 | LYMP | -7 | 29 | OTU20 (Actinobacillus)                   | 0.169590488  | 0.043624429 | 1 | #FF8E8A | 1 |
| 23.5 | 20 | LYMP | -7 | 29 | OTU10 (Alloprevotella)                   | 0.229610703  | 0.005981966 | 1 | #FF8E8A | 2 |
| 24.5 | 19 | LYMP | -7 | 29 | OTU26 (Prevotella)                       | 0.196903773  | 0.018839982 | 1 | #FF8E8A | 1 |
| 25.5 | 18 | LYMP | -7 | 29 | OTU71 (Alloprevotella)                   | 0.137077493  | 0.103797091 | 0 | #FF8E8A | 1 |
| 26.5 | 17 | LYMP | -7 | 29 | OTU46 (g__Absconditabacteriales_)        | 0.179251815  | 0.032804186 | 1 | #FF8E8A | 1 |
| 27.5 | 16 | LYMP | -7 | 29 | OTU9 (Porphyromonas)                     | 0.153948365  | 0.067367808 | 0 | #FF8E8A | 1 |
| 28.5 | 15 | LYMP | -7 | 29 | OTU62 (Aggregatibacter)                  | 0.20887511   | 0.012609401 | 1 | #FF8E8A | 2 |
| 29.5 | 14 | LYMP | -7 | 29 | OTU57 (Parvimonas)                       | 0.241999283  | 0.003713552 | 1 | #FF8E8A | 2 |
| 30.5 | 13 | LYMP | -7 | 29 | OTU45 (Alloprevotella)                   | 0.182123988  | 0.030063591 | 1 | #FF8E8A | 1 |
| 31.5 | 12 | LYMP | -7 | 29 | OTU67 (Alloprevotella)                   | 0.21256937   | 0.011092775 | 1 | #FF8E8A | 2 |
| 32.5 | 11 | LYMP | -7 | 29 | OTU29 (Porphyromonas)                    | 0.256220697  | 0.002085473 | 1 | #FF8E8A | 2 |
| 33.5 | 10 | LYMP | -7 | 29 | OTU365 (Fusobacterium)                   | 0.272599037  | 0.001030489 | 1 | #FF8E8A | 2 |
| 34.5 | 9  | LYMP | -7 | 29 | OTU169 (Treponema)                       | 0.230729523  | 0.005735449 | 1 | #FF8E8A | 2 |
| 35.5 | 8  | LYMP | -7 | 29 | OTU42 (g__Absconditabacteriales_)        | 0.230236784  | 0.005842878 | 1 | #FF8E8A | 2 |
| 36.5 | 7  | LYMP | -7 | 29 | OTU380 (Porphyromonas)                   | 0.16885959   | 0.044552142 | 1 | #FF8E8A | 1 |
| 37.5 | 6  | LYMP | -7 | 29 | OTU678 (Neisseria)                       | 0.169930936  | 0.043197848 | 1 | #FF8E8A | 1 |

|      |    |      |    |    |                                             |              |             |   |         |   |
|------|----|------|----|----|---------------------------------------------|--------------|-------------|---|---------|---|
| 38.5 | 5  | LYMP | -7 | 29 | OTU75 (Porphyromonas)                       | 0.169679712  | 0.043512293 | 1 | #FF8E8A | 1 |
| 39.5 | 4  | LYMP | -7 | 29 | OTU134 (Prevotella)                         | 0.174315287  | 0.038008893 | 1 | #FF8E8A | 1 |
| 40.5 | 3  | LYMP | -7 | 29 | OTU2 (Fusobacterium)                        | 0.22033648   | 0.008416977 | 1 | #FF8E8A | 2 |
| 41.5 | 2  | LYMP | -7 | 29 | OTU523 (Prevotella)                         | -0.002858724 | 0.973064867 | 0 | #00CCCC | 0 |
| 42.5 | 1  | LYMP | -7 | 29 | OTU4 (Prevotella)                           | -0.003246376 | 0.969414044 | 0 | #00CCCC | 0 |
| -0.5 | 44 | Hb   | -6 | 25 | OTU599 (Burkholderiales_unclassified)       | 0.030026139  | 0.722799188 | 0 | #FF8E8A | 0 |
| 0.5  | 43 | Hb   | -6 | 25 | OTU744 (Leptotrichia)                       | -0.08216648  | 0.330992159 | 0 | #00CCCC | 0 |
| 1.5  | 42 | Hb   | -6 | 25 | OTU658 (P5D1-392)                           | -0.059132104 | 0.484536863 | 0 | #00CCCC | 0 |
| 2.5  | 41 | Hb   | -6 | 25 | OTU796 (Rothia)                             | 0.035664374  | 0.673486521 | 0 | #FF8E8A | 0 |
| 3.5  | 40 | Hb   | -6 | 25 | OTU748 (Leptotrichia)                       | -0.051659752 | 0.541488385 | 0 | #00CCCC | 0 |
| 4.5  | 39 | Hb   | -6 | 25 | OTU762 (Streptococcus)                      | -0.151654241 | 0.071603434 | 0 | #00CCCC | 1 |
| 5.5  | 38 | Hb   | -6 | 25 | OTU34 (Halomonas)                           | -0.203083371 | 0.015353018 | 1 | #00CCCC | 2 |
| 6.5  | 37 | Hb   | -6 | 25 | OTU1 (Streptococcus)                        | -0.013348426 | 0.874720029 | 0 | #00CCCC | 0 |
| 7.5  | 36 | Hb   | -6 | 25 | OTU126<br>([Eubacterium]_ruminantium_group) | 0.175570163  | 0.036624059 | 1 | #FF8E8A | 1 |
| 8.5  | 35 | Hb   | -6 | 25 | OTU82 (Faecalibacterium)                    | 0.125186578  | 0.137694595 | 0 | #FF8E8A | 1 |
| 9.5  | 34 | Hb   | -6 | 25 | OTU69 (Fusicatenibacter)                    | 0.087551461  | 0.300171478 | 0 | #FF8E8A | 0 |
| 10.5 | 33 | Hb   | -6 | 25 | OTU85 (Prevotella)                          | 0.147959067  | 0.078877399 | 0 | #FF8E8A | 1 |
| 11.5 | 32 | Hb   | -6 | 25 | OTU252 (Prevotella)                         | 0.168614661  | 0.044866684 | 1 | #FF8E8A | 1 |
| 12.5 | 31 | Hb   | -6 | 25 | OTU129 (Acinetobacter)                      | 0.148028551  | 0.078735333 | 0 | #FF8E8A | 1 |
| 13.5 | 30 | Hb   | -6 | 25 | OTU31 (Pseudomonas)                         | 0.256063868  | 0.002099154 | 1 | #FF8E8A | 2 |
| 14.5 | 29 | Hb   | -6 | 25 | OTU15 (Campylobacter)                       | -0.031723541 | 0.707822086 | 0 | #00CCCC | 0 |
| 15.5 | 28 | Hb   | -6 | 25 | OTU87 (Corynebacterium)                     | 0.164136822  | 0.050951588 | 0 | #FF8E8A | 1 |
| 16.5 | 27 | Hb   | -6 | 25 | OTU114 (Prevotella)                         | 0.253139707  | 0.002369628 | 1 | #FF8E8A | 2 |
| 17.5 | 26 | Hb   | -6 | 25 | OTU172 (Prevotella)                         | 0.158642393  | 0.059336321 | 0 | #FF8E8A | 1 |
| 18.5 | 25 | Hb   | -6 | 25 | OTU119 (Prevotella)                         | 0.162105331  | 0.053929511 | 0 | #FF8E8A | 1 |
| 19.5 | 24 | Hb   | -6 | 25 | OTU5 (Haemophilus)                          | 0.216436096  | 0.009679364 | 1 | #FF8E8A | 2 |
| 20.5 | 23 | Hb   | -6 | 25 | OTU171 (Aggregatibacter)                    | 0.263848883  | 0.001510027 | 1 | #FF8E8A | 2 |
| 21.5 | 22 | Hb   | -6 | 25 | OTU39 (Haemophilus)                         | 0.209016375  | 0.012548227 | 1 | #FF8E8A | 2 |
| 22.5 | 21 | Hb   | -6 | 25 | OTU20 (Actinobacillus)                      | 0.082572559  | 0.328599766 | 0 | #FF8E8A | 0 |
| 23.5 | 20 | Hb   | -6 | 25 | OTU10 (Alloprevotella)                      | 0.172716057  | 0.039837343 | 1 | #FF8E8A | 1 |
| 24.5 | 19 | Hb   | -6 | 25 | OTU26 (Prevotella)                          | 0.145872009  | 0.0832416   | 0 | #FF8E8A | 1 |
| 25.5 | 18 | Hb   | -6 | 25 | OTU71 (Alloprevotella)                      | 0.276037641  | 8.84E-04    | 1 | #FF8E8A | 2 |
| 26.5 | 17 | Hb   | -6 | 25 | OTU46 (g__Absconditabacteriales_)           | 0.242117693  | 0.003696243 | 1 | #FF8E8A | 2 |
| 27.5 | 16 | Hb   | -6 | 25 | OTU9 (Porphyromonas)                        | 0.172521463  | 0.040064785 | 1 | #FF8E8A | 1 |
| 28.5 | 15 | Hb   | -6 | 25 | OTU62 (Aggregatibacter)                     | 0.249366965  | 0.002765109 | 1 | #FF8E8A | 2 |
| 29.5 | 14 | Hb   | -6 | 25 | OTU57 (Parvimonas)                          | 0.225686521  | 0.006922945 | 1 | #FF8E8A | 2 |
| 30.5 | 13 | Hb   | -6 | 25 | OTU45 (Alloprevotella)                      | 0.224407494  | 0.00725689  | 1 | #FF8E8A | 2 |
| 31.5 | 12 | Hb   | -6 | 25 | OTU67 (Alloprevotella)                      | 0.175736564  | 0.036443659 | 1 | #FF8E8A | 1 |
| 32.5 | 11 | Hb   | -6 | 25 | OTU29 (Porphyromonas)                       | 0.257053311  | 0.002014182 | 1 | #FF8E8A | 2 |
| 33.5 | 10 | Hb   | -6 | 25 | OTU365 (Fusobacterium)                      | 0.213028653  | 0.010915907 | 1 | #FF8E8A | 2 |
| 34.5 | 9  | Hb   | -6 | 25 | OTU169 (Treponema)                          | 0.273328201  | 9.98E-04    | 1 | #FF8E8A | 2 |
| 35.5 | 8  | Hb   | -6 | 25 | OTU42 (g__Absconditabacteriales_)           | 0.154242147  | 0.066840445 | 0 | #FF8E8A | 1 |
| 36.5 | 7  | Hb   | -6 | 25 | OTU380 (Porphyromonas)                      | 0.188918765  | 0.024344731 | 1 | #FF8E8A | 1 |
| 37.5 | 6  | Hb   | -6 | 25 | OTU678 (Neisseria)                          | 0.148965365  | 0.076839963 | 0 | #FF8E8A | 1 |
| 38.5 | 5  | Hb   | -6 | 25 | OTU75 (Porphyromonas)                       | 0.246454814  | 0.003110149 | 1 | #FF8E8A | 2 |
| 39.5 | 4  | Hb   | -6 | 25 | OTU134 (Prevotella)                         | 0.073914484  | 0.38200701  | 0 | #FF8E8A | 0 |
| 40.5 | 3  | Hb   | -6 | 25 | OTU2 (Fusobacterium)                        | 0.204561279  | 0.014607602 | 1 | #FF8E8A | 2 |
| 41.5 | 2  | Hb   | -6 | 25 | OTU523 (Prevotella)                         | 0.128667215  | 0.126998545 | 0 | #FF8E8A | 1 |
| 42.5 | 1  | Hb   | -6 | 25 | OTU4 (Prevotella)                           | 0.14992664   | 0.074933523 | 0 | #FF8E8A | 1 |
| -0.5 | 44 | PLT  | -5 | 21 | OTU599 (Burkholderiales_unclassified)       | -0.053819473 | 0.524694448 | 0 | #00CCCC | 0 |
| 0.5  | 43 | PLT  | -5 | 21 | OTU744 (Leptotrichia)                       | -0.258888756 | 0.001864778 | 1 | #00CCCC | 2 |
| 1.5  | 42 | PLT  | -5 | 21 | OTU658 (P5D1-392)                           | -0.119453277 | 0.156791942 | 0 | #00CCCC | 1 |
| 2.5  | 41 | PLT  | -5 | 21 | OTU796 (Rothia)                             | -0.020180148 | 0.81159179  | 0 | #00CCCC | 0 |
| 3.5  | 40 | PLT  | -5 | 21 | OTU748 (Leptotrichia)                       | -0.252935631 | 0.002389634 | 1 | #00CCCC | 2 |
| 4.5  | 39 | PLT  | -5 | 21 | OTU762 (Streptococcus)                      | -0.123818374 | 0.142082359 | 0 | #00CCCC | 1 |
| 5.5  | 38 | PLT  | -5 | 21 | OTU34 (Halomonas)                           | -0.033089327 | 0.69585135  | 0 | #00CCCC | 0 |
| 6.5  | 37 | PLT  | -5 | 21 | OTU1 (Streptococcus)                        | 0.010696465  | 0.89946272  | 0 | #FF8E8A | 0 |

|      |    |     |    |    |                                             |              |             |   |         |   |
|------|----|-----|----|----|---------------------------------------------|--------------|-------------|---|---------|---|
| 7.5  | 36 | PLT | -5 | 21 | OTU126<br>([Eubacterium]_ruminantium_group) | 0.131219702  | 0.119570008 | 0 | #FF8E8A | 1 |
| 8.5  | 35 | PLT | -5 | 21 | OTU82 (Faecalibacterium)                    | 0.172031698  | 0.040642052 | 1 | #FF8E8A | 1 |
| 9.5  | 34 | PLT | -5 | 21 | OTU69 (Fusicatenibacter)                    | 0.223760571  | 0.007431182 | 1 | #FF8E8A | 2 |
| 10.5 | 33 | PLT | -5 | 21 | OTU85 (Prevotella)                          | 0.183156775  | 0.029126902 | 1 | #FF8E8A | 1 |
| 11.5 | 32 | PLT | -5 | 21 | OTU252 (Prevotella)                         | 0.193294258  | 0.021178407 | 1 | #FF8E8A | 1 |
| 12.5 | 31 | PLT | -5 | 21 | OTU129 (Acinetobacter)                      | 0.227965694  | 0.006361579 | 1 | #FF8E8A | 2 |
| 13.5 | 30 | PLT | -5 | 21 | OTU31 (Pseudomonas)                         | 0.277696882  | 8.20E-04    | 1 | #FF8E8A | 2 |
| 14.5 | 29 | PLT | -5 | 21 | OTU15 (Campylobacter)                       | 0.116380882  | 0.167810855 | 0 | #FF8E8A | 1 |
| 15.5 | 28 | PLT | -5 | 21 | OTU87 (Corynebacterium)                     | 0.272729832  | 0.001024522 | 1 | #FF8E8A | 2 |
| 16.5 | 27 | PLT | -5 | 21 | OTU114 (Prevotella)                         | 0.213797643  | 0.010625318 | 1 | #FF8E8A | 2 |
| 17.5 | 26 | PLT | -5 | 21 | OTU172 (Prevotella)                         | 0.244792463  | 0.003324082 | 1 | #FF8E8A | 2 |
| 18.5 | 25 | PLT | -5 | 21 | OTU119 (Prevotella)                         | 0.235804286  | 0.004727364 | 1 | #FF8E8A | 2 |
| 19.5 | 24 | PLT | -5 | 21 | OTU5 (Haemophilus)                          | 0.159294335  | 0.058285738 | 0 | #FF8E8A | 1 |
| 20.5 | 23 | PLT | -5 | 21 | OTU171 (Aggregatibacter)                    | 0.210136919  | 0.012072122 | 1 | #FF8E8A | 2 |
| 21.5 | 22 | PLT | -5 | 21 | OTU39 (Haemophilus)                         | 0.122677507  | 0.145821609 | 0 | #FF8E8A | 1 |
| 22.5 | 21 | PLT | -5 | 21 | OTU20 (Actinobacillus)                      | 0.185290489  | 0.027270195 | 1 | #FF8E8A | 1 |
| 23.5 | 20 | PLT | -5 | 21 | OTU10 (Alloprevotella)                      | 0.288714661  | 4.93E-04    | 1 | #FF8E8A | 2 |
| 24.5 | 19 | PLT | -5 | 21 | OTU26 (Prevotella)                          | 0.258073744  | 0.00192983  | 1 | #FF8E8A | 2 |
| 25.5 | 18 | PLT | -5 | 21 | OTU71 (Alloprevotella)                      | 0.226312355  | 0.006764576 | 1 | #FF8E8A | 2 |
| 26.5 | 17 | PLT | -5 | 21 | OTU46 (g__Absconditabacteriales_)           | 0.199711405  | 0.017178819 | 1 | #FF8E8A | 1 |
| 27.5 | 16 | PLT | -5 | 21 | OTU9 (Porphyromonas)                        | 0.100027978  | 0.236251371 | 0 | #FF8E8A | 1 |
| 28.5 | 15 | PLT | -5 | 21 | OTU62 (Aggregatibacter)                     | 0.259337106  | 0.001829848 | 1 | #FF8E8A | 2 |
| 29.5 | 14 | PLT | -5 | 21 | OTU57 (Parvimonas)                          | 0.303577831  | 2.40E-04    | 1 | #FF8E8A | 3 |
| 30.5 | 13 | PLT | -5 | 21 | OTU45 (Alloprevotella)                      | 0.262332624  | 0.001611327 | 1 | #FF8E8A | 2 |
| 31.5 | 12 | PLT | -5 | 21 | OTU67 (Alloprevotella)                      | 0.184739844  | 0.027739408 | 1 | #FF8E8A | 1 |
| 32.5 | 11 | PLT | -5 | 21 | OTU29 (Porphyromonas)                       | 0.234306065  | 0.005007058 | 1 | #FF8E8A | 2 |
| 33.5 | 10 | PLT | -5 | 21 | OTU365 (Fusobacterium)                      | 0.279590254  | 7.52E-04    | 1 | #FF8E8A | 2 |
| 34.5 | 9  | PLT | -5 | 21 | OTU169 (Treponema)                          | 0.284661052  | 5.96E-04    | 1 | #FF8E8A | 2 |
| 35.5 | 8  | PLT | -5 | 21 | OTU42 (g__Absconditabacteriales_)           | 0.247279725  | 0.003008669 | 1 | #FF8E8A | 2 |
| 36.5 | 7  | PLT | -5 | 21 | OTU380 (Porphyromonas)                      | 0.103480621  | 0.220383956 | 0 | #FF8E8A | 1 |
| 37.5 | 6  | PLT | -5 | 21 | OTU678 (Neisseria)                          | 0.121563535  | 0.149544155 | 0 | #FF8E8A | 1 |
| 38.5 | 5  | PLT | -5 | 21 | OTU75 (Porphyromonas)                       | 0.196836227  | 0.018881601 | 1 | #FF8E8A | 1 |
| 39.5 | 4  | PLT | -5 | 21 | OTU134 (Prevotella)                         | 0.262401402  | 0.001606601 | 1 | #FF8E8A | 2 |
| 40.5 | 3  | PLT | -5 | 21 | OTU2 (Fusobacterium)                        | 0.078167602  | 0.355144219 | 0 | #FF8E8A | 0 |
| 41.5 | 2  | PLT | -5 | 21 | OTU523 (Prevotella)                         | 0.232870626  | 0.00528882  | 1 | #FF8E8A | 2 |
| 42.5 | 1  | PLT | -5 | 21 | OTU4 (Prevotella)                           | 0.259892239  | 0.001787423 | 1 | #FF8E8A | 2 |
| -0.5 | 44 | ALT | -4 | 17 | OTU599 (Burkholderiales_unclassified)       | 0.029526381  | 0.72722922  | 0 | #FF8E8A | 0 |
| 0.5  | 43 | ALT | -4 | 17 | OTU744 (Leptotrichia)                       | 0.104376169  | 0.216394737 | 0 | #FF8E8A | 1 |
| 1.5  | 42 | ALT | -4 | 17 | OTU658 (P5D1-392)                           | 0.058418912  | 0.489830263 | 0 | #FF8E8A | 0 |
| 2.5  | 41 | ALT | -4 | 17 | OTU796 (Rothia)                             | 0.132904107  | 0.114855339 | 0 | #FF8E8A | 1 |
| 3.5  | 40 | ALT | -4 | 17 | OTU748 (Leptotrichia)                       | 0.059699682  | 0.480346247 | 0 | #FF8E8A | 0 |
| 4.5  | 39 | ALT | -4 | 17 | OTU762 (Streptococcus)                      | -0.019159486 | 0.82095688  | 0 | #00CCCC | 0 |
| 5.5  | 38 | ALT | -4 | 17 | OTU34 (Halomonas)                           | 0.077739463  | 0.357793692 | 0 | #FF8E8A | 0 |
| 6.5  | 37 | ALT | -4 | 17 | OTU1 (Streptococcus)                        | -0.113687064 | 0.177936583 | 0 | #00CCCC | 1 |
| 7.5  | 36 | ALT | -4 | 17 | OTU126<br>([Eubacterium]_ruminantium_group) | -0.010088416 | 0.905150322 | 0 | #00CCCC | 0 |
| 8.5  | 35 | ALT | -4 | 17 | OTU82 (Faecalibacterium)                    | 0.010533205  | 0.900989336 | 0 | #FF8E8A | 0 |
| 9.5  | 34 | ALT | -4 | 17 | OTU69 (Fusicatenibacter)                    | -0.045977093 | 0.586905904 | 0 | #00CCCC | 0 |
| 10.5 | 33 | ALT | -4 | 17 | OTU85 (Prevotella)                          | 0.01560423   | 0.853767472 | 0 | #FF8E8A | 0 |
| 11.5 | 32 | ALT | -4 | 17 | OTU252 (Prevotella)                         | -0.029919852 | 0.72374059  | 0 | #00CCCC | 0 |
| 12.5 | 31 | ALT | -4 | 17 | OTU129 (Acinetobacter)                      | -0.079959577 | 0.344188259 | 0 | #00CCCC | 0 |
| 13.5 | 30 | ALT | -4 | 17 | OTU31 (Pseudomonas)                         | -0.079183065 | 0.348909307 | 0 | #00CCCC | 0 |
| 14.5 | 29 | ALT | -4 | 17 | OTU15 (Campylobacter)                       | -0.183773398 | 0.028579588 | 1 | #00CCCC | 1 |
| 15.5 | 28 | ALT | -4 | 17 | OTU87 (Corynebacterium)                     | 0.021964526  | 0.795283871 | 0 | #FF8E8A | 0 |
| 16.5 | 27 | ALT | -4 | 17 | OTU114 (Prevotella)                         | -4.29E-04    | 0.995955814 | 0 | #00CCCC | 0 |
| 17.5 | 26 | ALT | -4 | 17 | OTU172 (Prevotella)                         | -0.062993788 | 0.456415065 | 0 | #00CCCC | 0 |
| 18.5 | 25 | ALT | -4 | 17 | OTU119 (Prevotella)                         | -0.094285282 | 0.264380811 | 0 | #00CCCC | 0 |
| 19.5 | 24 | ALT | -4 | 17 | OTU5 (Haemophilus)                          | -0.033257539 | 0.694382117 | 0 | #00CCCC | 0 |

|      |    |     |    |    |                                          |              |             |   |         |   |
|------|----|-----|----|----|------------------------------------------|--------------|-------------|---|---------|---|
| 20.5 | 23 | ALT | -4 | 17 | OTU171 (Aggregatibacter)                 | 0.019315466  | 0.819524012 | 0 | #FF8E8A | 0 |
| 21.5 | 22 | ALT | -4 | 17 | OTU39 (Haemophilus)                      | -0.100042339 | 0.236183755 | 0 | #00CCCC | 1 |
| 22.5 | 21 | ALT | -4 | 17 | OTU20 (Actinobacillus)                   | -0.042277056 | 0.617385008 | 0 | #00CCCC | 0 |
| 23.5 | 20 | ALT | -4 | 17 | OTU10 (Alloprevotella)                   | -0.065375369 | 0.439534704 | 0 | #00CCCC | 0 |
| 24.5 | 19 | ALT | -4 | 17 | OTU26 (Prevotella)                       | -0.043463361 | 0.607538148 | 0 | #00CCCC | 0 |
| 25.5 | 18 | ALT | -4 | 17 | OTU71 (Alloprevotella)                   | -0.079093563 | 0.349456068 | 0 | #00CCCC | 0 |
| 26.5 | 17 | ALT | -4 | 17 | OTU46 (g__Absconditabacteriales_)        | -0.07852838  | 0.352770742 | 0 | #00CCCC | 0 |
| 27.5 | 16 | ALT | -4 | 17 | OTU9 (Porphyromonas)                     | -0.048654483 | 0.565290454 | 0 | #00CCCC | 0 |
| 28.5 | 15 | ALT | -4 | 17 | OTU62 (Aggregatibacter)                  | -0.076809284 | 0.363592245 | 0 | #00CCCC | 0 |
| 29.5 | 14 | ALT | -4 | 17 | OTU57 (Parvimonas)                       | 0.032628662  | 0.699880757 | 0 | #FF8E8A | 0 |
| 30.5 | 13 | ALT | -4 | 17 | OTU45 (Alloprevotella)                   | -0.066499592 | 0.431691206 | 0 | #00CCCC | 0 |
| 31.5 | 12 | ALT | -4 | 17 | OTU67 (Alloprevotella)                   | -0.077935391 | 0.3565797   | 0 | #00CCCC | 0 |
| 32.5 | 11 | ALT | -4 | 17 | OTU29 (Porphyromonas)                    | 0.122289821  | 0.147109089 | 0 | #FF8E8A | 1 |
| 33.5 | 10 | ALT | -4 | 17 | OTU365 (Fusobacterium)                   | 0.037393647  | 0.658624653 | 0 | #FF8E8A | 0 |
| 34.5 | 9  | ALT | -4 | 17 | OTU169 (Treponema)                       | 0.035155547  | 0.677883968 | 0 | #FF8E8A | 0 |
| 35.5 | 8  | ALT | -4 | 17 | OTU42 (g__Absconditabacteriales_)        | -0.206787088 | 0.013544543 | 1 | #00CCCC | 2 |
| 36.5 | 7  | ALT | -4 | 17 | OTU380 (Porphyromonas)                   | -0.044598521 | 0.598181285 | 0 | #00CCCC | 0 |
| 37.5 | 6  | ALT | -4 | 17 | OTU678 (Neisseria)                       | -0.033983067 | 0.688058135 | 0 | #00CCCC | 0 |
| 38.5 | 5  | ALT | -4 | 17 | OTU75 (Porphyromonas)                    | -0.082742599 | 0.327601283 | 0 | #00CCCC | 0 |
| 39.5 | 4  | ALT | -4 | 17 | OTU134 (Prevotella)                      | -0.072441565 | 0.391590072 | 0 | #00CCCC | 0 |
| 40.5 | 3  | ALT | -4 | 17 | OTU2 (Fusobacterium)                     | 0.154511998  | 0.066359007 | 0 | #FF8E8A | 1 |
| 41.5 | 2  | ALT | -4 | 17 | OTU523 (Prevotella)                      | -0.056042852 | 0.507685527 | 0 | #00CCCC | 0 |
| 42.5 | 1  | ALT | -4 | 17 | OTU4 (Prevotella)                        | -0.070327083 | 0.405596868 | 0 | #00CCCC | 0 |
| -0.5 | 44 | AST | -3 | 13 | OTU599 (Burkholderiales_unclassified)    | -0.108454238 | 0.198879094 | 0 | #00CCCC | 1 |
| 0.5  | 43 | AST | -3 | 13 | OTU744 (Leptotrichia)                    | -0.002228241 | 0.979003776 | 0 | #00CCCC | 0 |
| 1.5  | 42 | AST | -3 | 13 | OTU658 (P5D1-392)                        | 0.032008928  | 0.705314719 | 0 | #FF8E8A | 0 |
| 2.5  | 41 | AST | -3 | 13 | OTU796 (Rothia)                          | 0.032485966  | 0.701130613 | 0 | #FF8E8A | 0 |
| 3.5  | 40 | AST | -3 | 13 | OTU748 (Leptotrichia)                    | -0.021491072 | 0.799602598 | 0 | #00CCCC | 0 |
| 4.5  | 39 | AST | -3 | 13 | OTU762 (Streptococcus)                   | -0.013755487 | 0.870932262 | 0 | #00CCCC | 0 |
| 5.5  | 38 | AST | -3 | 13 | OTU34 (Halomonas)                        | 0.242002333  | 0.003713106 | 1 | #FF8E8A | 2 |
| 6.5  | 37 | AST | -3 | 13 | OTU1 (Streptococcus)                     | -0.067317473 | 0.426035786 | 0 | #00CCCC | 0 |
| 7.5  | 36 | AST | -3 | 13 | OTU126 ([Eubacterium]_ruminantium_group) | -0.060035002 | 0.477879682 | 0 | #00CCCC | 0 |
| 8.5  | 35 | AST | -3 | 13 | OTU82 (Faecalibacterium)                 | -0.007755296 | 0.927016198 | 0 | #00CCCC | 0 |
| 9.5  | 34 | AST | -3 | 13 | OTU69 (Fusicatenibacter)                 | -0.085710714 | 0.310486714 | 0 | #00CCCC | 0 |
| 10.5 | 33 | AST | -3 | 13 | OTU85 (Prevotella)                       | -0.024935039 | 0.768333986 | 0 | #00CCCC | 0 |
| 11.5 | 32 | AST | -3 | 13 | OTU252 (Prevotella)                      | -0.057705091 | 0.495158999 | 0 | #00CCCC | 0 |
| 12.5 | 31 | AST | -3 | 13 | OTU129 (Acinetobacter)                   | -0.046718838 | 0.580879736 | 0 | #00CCCC | 0 |
| 13.5 | 30 | AST | -3 | 13 | OTU31 (Pseudomonas)                      | -0.108533108 | 0.198550758 | 0 | #00CCCC | 1 |
| 14.5 | 29 | AST | -3 | 13 | OTU15 (Campylobacter)                    | -0.106222031 | 0.208335143 | 0 | #00CCCC | 1 |
| 15.5 | 28 | AST | -3 | 13 | OTU87 (Corynebacterium)                  | -0.069024068 | 0.414373848 | 0 | #00CCCC | 0 |
| 16.5 | 27 | AST | -3 | 13 | OTU114 (Prevotella)                      | -0.009261058 | 0.912897005 | 0 | #00CCCC | 0 |
| 17.5 | 26 | AST | -3 | 13 | OTU172 (Prevotella)                      | -0.086267696 | 0.307341343 | 0 | #00CCCC | 0 |
| 18.5 | 25 | AST | -3 | 13 | OTU119 (Prevotella)                      | -0.084292252 | 0.318591581 | 0 | #00CCCC | 0 |
| 19.5 | 24 | AST | -3 | 13 | OTU5 (Haemophilus)                       | -0.130302447 | 0.122199749 | 0 | #00CCCC | 1 |
| 20.5 | 23 | AST | -3 | 13 | OTU171 (Aggregatibacter)                 | -0.060998443 | 0.47083103  | 0 | #00CCCC | 0 |
| 21.5 | 22 | AST | -3 | 13 | OTU39 (Haemophilus)                      | -0.116621269 | 0.166928517 | 0 | #00CCCC | 1 |
| 22.5 | 21 | AST | -3 | 13 | OTU20 (Actinobacillus)                   | -0.086739357 | 0.304694178 | 0 | #00CCCC | 0 |
| 23.5 | 20 | AST | -3 | 13 | OTU10 (Alloprevotella)                   | -0.123615422 | 0.142742163 | 0 | #00CCCC | 1 |
| 24.5 | 19 | AST | -3 | 13 | OTU26 (Prevotella)                       | -0.074245214 | 0.379874949 | 0 | #00CCCC | 0 |
| 25.5 | 18 | AST | -3 | 13 | OTU71 (Alloprevotella)                   | -0.188037215 | 0.025029578 | 1 | #00CCCC | 1 |
| 26.5 | 17 | AST | -3 | 13 | OTU46 (g__Absconditabacteriales_)        | -0.137192176 | 0.103505473 | 0 | #00CCCC | 1 |
| 27.5 | 16 | AST | -3 | 13 | OTU9 (Porphyromonas)                     | 0.022993339  | 0.785920837 | 0 | #FF8E8A | 0 |
| 28.5 | 15 | AST | -3 | 13 | OTU62 (Aggregatibacter)                  | -0.179961108 | 0.032108432 | 1 | #00CCCC | 1 |
| 29.5 | 14 | AST | -3 | 13 | OTU57 (Parvimonas)                       | -0.098849263 | 0.241847087 | 0 | #00CCCC | 0 |
| 30.5 | 13 | AST | -3 | 13 | OTU45 (Alloprevotella)                   | -0.174109568 | 0.038240066 | 1 | #00CCCC | 1 |
| 31.5 | 12 | AST | -3 | 13 | OTU67 (Alloprevotella)                   | -0.138575415 | 0.100038659 | 0 | #00CCCC | 1 |
| 32.5 | 11 | AST | -3 | 13 | OTU29 (Porphyromonas)                    | -0.00450955  | 0.957522524 | 0 | #00CCCC | 0 |
| 33.5 | 10 | AST | -3 | 13 | OTU365 (Fusobacterium)                   | -0.081002204 | 0.337913043 | 0 | #00CCCC | 0 |



|      |    |      |    |    |                                          |              |             |   |         |   |
|------|----|------|----|----|------------------------------------------|--------------|-------------|---|---------|---|
| 34.5 | 9  | AST  | -3 | 13 | OTU169 (Treponema)                       | -0.007340226 | 0.930912407 | 0 | #00CCCC | 0 |
| 35.5 | 8  | AST  | -3 | 13 | OTU42 (g__Absconditabacteriales_)        | -0.272790843 | 0.001021749 | 1 | #00CCCC | 2 |
| 36.5 | 7  | AST  | -3 | 13 | OTU380 (Porphyromonas)                   | 0.034742621  | 0.681460615 | 0 | #FF8E8A | 0 |
| 37.5 | 6  | AST  | -3 | 13 | OTU678 (Neisseria)                       | -0.150189981 | 0.074417975 | 0 | #00CCCC | 1 |
| 38.5 | 5  | AST  | -3 | 13 | OTU75 (Porphyromonas)                    | -0.168254983 | 0.045331946 | 1 | #00CCCC | 1 |
| 39.5 | 4  | AST  | -3 | 13 | OTU134 (Prevotella)                      | -0.192626622 | 0.021637301 | 1 | #00CCCC | 1 |
| 40.5 | 3  | AST  | -3 | 13 | OTU2 (Fusobacterium)                     | -0.07482588  | 0.376149222 | 0 | #00CCCC | 0 |
| 41.5 | 2  | AST  | -3 | 13 | OTU523 (Prevotella)                      | -0.177829888 | 0.034237483 | 1 | #00CCCC | 1 |
| 42.5 | 1  | AST  | -3 | 13 | OTU4 (Prevotella)                        | -0.199336967 | 0.017392743 | 1 | #00CCCC | 1 |
| -0.5 | 44 | Alb  | -2 | 9  | OTU599 (Burkholderiales_unclassified)    | 0.029794547  | 0.724850969 | 0 | #FF8E8A | 0 |
| 0.5  | 43 | Alb  | -2 | 9  | OTU744 (Leptotrichia)                    | -0.058990898 | 0.485582473 | 0 | #00CCCC | 0 |
| 1.5  | 42 | Alb  | -2 | 9  | OTU658 (P5D1-392)                        | -0.126994399 | 0.132056438 | 0 | #00CCCC | 1 |
| 2.5  | 41 | Alb  | -2 | 9  | OTU796 (Rothia)                          | -0.189697403 | 0.023753258 | 1 | #00CCCC | 1 |
| 3.5  | 40 | Alb  | -2 | 9  | OTU748 (Leptotrichia)                    | -0.106965305 | 0.205151345 | 0 | #00CCCC | 1 |
| 4.5  | 39 | Alb  | -2 | 9  | OTU762 (Streptococcus)                   | -0.230009597 | 0.005893012 | 1 | #00CCCC | 2 |
| 5.5  | 38 | Alb  | -2 | 9  | OTU34 (Halomonas)                        | -0.311496272 | 1.61E-04    | 1 | #00CCCC | 3 |
| 6.5  | 37 | Alb  | -2 | 9  | OTU1 (Streptococcus)                     | 0.02651745   | 0.754087672 | 0 | #FF8E8A | 0 |
| 7.5  | 36 | Alb  | -2 | 9  | OTU126 ([Eubacterium]_ruminantium_group) | 0.211094431  | 0.011677913 | 1 | #FF8E8A | 2 |
| 8.5  | 35 | Alb  | -2 | 9  | OTU82 (Faecalibacterium)                 | 0.183050768  | 0.029221887 | 1 | #FF8E8A | 1 |
| 9.5  | 34 | Alb  | -2 | 9  | OTU69 (Fusicatenibacter)                 | 0.164816241  | 0.049986564 | 1 | #FF8E8A | 1 |
| 10.5 | 33 | Alb  | -2 | 9  | OTU85 (Prevotella)                       | 0.227599684  | 0.006448904 | 1 | #FF8E8A | 2 |
| 11.5 | 32 | Alb  | -2 | 9  | OTU252 (Prevotella)                      | 0.213108599  | 0.010885375 | 1 | #FF8E8A | 2 |
| 12.5 | 31 | Alb  | -2 | 9  | OTU129 (Acinetobacter)                   | 0.237730387  | 0.00438838  | 1 | #FF8E8A | 2 |
| 13.5 | 30 | Alb  | -2 | 9  | OTU31 (Pseudomonas)                      | 0.414147897  | 3.00E-07    | 1 | #FF8E8A | 4 |
| 14.5 | 29 | Alb  | -2 | 9  | OTU15 (Campylobacter)                    | 0.282143281  | 6.69E-04    | 1 | #FF8E8A | 2 |
| 15.5 | 28 | Alb  | -2 | 9  | OTU87 (Corynebacterium)                  | 0.238730253  | 0.004221147 | 1 | #FF8E8A | 2 |
| 16.5 | 27 | Alb  | -2 | 9  | OTU114 (Prevotella)                      | 0.333169858  | 5.09E-05    | 1 | #FF8E8A | 3 |
| 17.5 | 26 | Alb  | -2 | 9  | OTU172 (Prevotella)                      | 0.260386191  | 0.001750427 | 1 | #FF8E8A | 2 |
| 18.5 | 25 | Alb  | -2 | 9  | OTU119 (Prevotella)                      | 0.285314749  | 5.78E-04    | 1 | #FF8E8A | 2 |
| 19.5 | 24 | Alb  | -2 | 9  | OTU5 (Haemophilus)                       | 0.438033564  | 4.99E-08    | 1 | #FF8E8A | 4 |
| 20.5 | 23 | Alb  | -2 | 9  | OTU171 (Aggregatibacter)                 | 0.39606169   | 1.07E-06    | 1 | #FF8E8A | 3 |
| 21.5 | 22 | Alb  | -2 | 9  | OTU39 (Haemophilus)                      | 0.469441665  | 3.79E-09    | 1 | #FF8E8A | 4 |
| 22.5 | 21 | Alb  | -2 | 9  | OTU20 (Actinobacillus)                   | 0.414352625  | 2.96E-07    | 1 | #FF8E8A | 4 |
| 23.5 | 20 | Alb  | -2 | 9  | OTU10 (Alloprevotella)                   | 0.49631504   | 3.36E-10    | 1 | #FF8E8A | 4 |
| 24.5 | 19 | Alb  | -2 | 9  | OTU26 (Prevotella)                       | 0.368167348  | 6.55E-06    | 1 | #FF8E8A | 3 |
| 25.5 | 18 | Alb  | -2 | 9  | OTU71 (Alloprevotella)                   | 0.499552222  | 2.47E-10    | 1 | #FF8E8A | 4 |
| 26.5 | 17 | Alb  | -2 | 9  | OTU46 (g__Absconditabacteriales_)        | 0.417823979  | 2.30E-07    | 1 | #FF8E8A | 4 |
| 27.5 | 16 | Alb  | -2 | 9  | OTU9 (Porphyromonas)                     | 0.313912403  | 1.42E-04    | 1 | #FF8E8A | 3 |
| 28.5 | 15 | Alb  | -2 | 9  | OTU62 (Aggregatibacter)                  | 0.498601364  | 2.71E-10    | 1 | #FF8E8A | 4 |
| 29.5 | 14 | Alb  | -2 | 9  | OTU57 (Parvimonas)                       | 0.28344439   | 6.30E-04    | 1 | #FF8E8A | 2 |
| 30.5 | 13 | Alb  | -2 | 9  | OTU45 (Alloprevotella)                   | 0.394308864  | 1.20E-06    | 1 | #FF8E8A | 3 |
| 31.5 | 12 | Alb  | -2 | 9  | OTU67 (Alloprevotella)                   | 0.418871728  | 2.13E-07    | 1 | #FF8E8A | 4 |
| 32.5 | 11 | Alb  | -2 | 9  | OTU29 (Porphyromonas)                    | 0.271892125  | 0.001063295 | 1 | #FF8E8A | 2 |
| 33.5 | 10 | Alb  | -2 | 9  | OTU365 (Fusobacterium)                   | 0.351257714  | 1.82E-05    | 1 | #FF8E8A | 3 |
| 34.5 | 9  | Alb  | -2 | 9  | OTU169 (Treponema)                       | 0.235897588  | 0.004710418 | 1 | #FF8E8A | 2 |
| 35.5 | 8  | Alb  | -2 | 9  | OTU42 (g__Absconditabacteriales_)        | 0.386699416  | 2.00E-06    | 1 | #FF8E8A | 3 |
| 36.5 | 7  | Alb  | -2 | 9  | OTU380 (Porphyromonas)                   | 0.338072632  | 3.87E-05    | 1 | #FF8E8A | 3 |
| 37.5 | 6  | Alb  | -2 | 9  | OTU678 (Neisseria)                       | 0.245710207  | 0.00320439  | 1 | #FF8E8A | 2 |
| 38.5 | 5  | Alb  | -2 | 9  | OTU75 (Porphyromonas)                    | 0.295511767  | 3.56E-04    | 1 | #FF8E8A | 2 |
| 39.5 | 4  | Alb  | -2 | 9  | OTU134 (Prevotella)                      | 0.420496496  | 1.89E-07    | 1 | #FF8E8A | 4 |
| 40.5 | 3  | Alb  | -2 | 9  | OTU2 (Fusobacterium)                     | 0.381194889  | 2.87E-06    | 1 | #FF8E8A | 3 |
| 41.5 | 2  | Alb  | -2 | 9  | OTU523 (Prevotella)                      | 0.272292967  | 0.001044578 | 1 | #FF8E8A | 2 |
| 42.5 | 1  | Alb  | -2 | 9  | OTU4 (Prevotella)                        | 0.278708813  | 7.83E-04    | 1 | #FF8E8A | 2 |
| -0.5 | 44 | TBIL | -1 | 5  | OTU599 (Burkholderiales_unclassified)    | 0.117246724  | 0.164648949 | 0 | #FF8E8A | 1 |
| 0.5  | 43 | TBIL | -1 | 5  | OTU744 (Leptotrichia)                    | 0.272531151  | 0.001033599 | 1 | #FF8E8A | 2 |
| 1.5  | 42 | TBIL | -1 | 5  | OTU658 (P5D1-392)                        | 0.163543807  | 0.051806452 | 0 | #FF8E8A | 1 |
| 2.5  | 41 | TBIL | -1 | 5  | OTU796 (Rothia)                          | 0.100199488  | 0.235444772 | 0 | #FF8E8A | 1 |
| 3.5  | 40 | TBIL | -1 | 5  | OTU748 (Leptotrichia)                    | 0.235322778  | 0.004815689 | 1 | #FF8E8A | 2 |

|      |    |      |    |   |                                             |              |             |   |         |   |
|------|----|------|----|---|---------------------------------------------|--------------|-------------|---|---------|---|
| 4.5  | 39 | TBIL | -1 | 5 | OTU762 (Streptococcus)                      | 0.105998159  | 0.209301003 | 0 | #FF8E8A | 1 |
| 5.5  | 38 | TBIL | -1 | 5 | OTU34 (Halomonas)                           | -0.046054107 | 0.586278887 | 0 | #00CCCC | 0 |
| 6.5  | 37 | TBIL | -1 | 5 | OTU1 (Streptococcus)                        | 0.048040521  | 0.570213582 | 0 | #FF8E8A | 0 |
| 7.5  | 36 | TBIL | -1 | 5 | OTU126<br>([Eubacterium]_ruminantium_group) | -0.098334676 | 0.244318691 | 0 | #00CCCC | 0 |
| 8.5  | 35 | TBIL | -1 | 5 | OTU82 (Faecalibacterium)                    | -0.107863793 | 0.20134959  | 0 | #00CCCC | 1 |
| 9.5  | 34 | TBIL | -1 | 5 | OTU69 (Fusicatenibacter)                    | -0.063006791 | 0.456321932 | 0 | #00CCCC | 0 |
| 10.5 | 33 | TBIL | -1 | 5 | OTU85 (Prevotella)                          | -0.114994987 | 0.172965453 | 0 | #00CCCC | 1 |
| 11.5 | 32 | TBIL | -1 | 5 | OTU252 (Prevotella)                         | -0.107737436 | 0.20188115  | 0 | #00CCCC | 1 |
| 12.5 | 31 | TBIL | -1 | 5 | OTU129 (Acinetobacter)                      | -0.174908302 | 0.037349069 | 1 | #00CCCC | 1 |
| 13.5 | 30 | TBIL | -1 | 5 | OTU31 (Pseudomonas)                         | -0.071814548 | 0.395712967 | 0 | #00CCCC | 0 |
| 14.5 | 29 | TBIL | -1 | 5 | OTU15 (Campylobacter)                       | -0.052658381 | 0.533690175 | 0 | #00CCCC | 0 |
| 15.5 | 28 | TBIL | -1 | 5 | OTU87 (Corynebacterium)                     | -0.148865373 | 0.077040497 | 0 | #00CCCC | 1 |
| 16.5 | 27 | TBIL | -1 | 5 | OTU114 (Prevotella)                         | 0.021538725  | 0.799167638 | 0 | #FF8E8A | 0 |
| 17.5 | 26 | TBIL | -1 | 5 | OTU172 (Prevotella)                         | -0.050085553 | 0.553894328 | 0 | #00CCCC | 0 |
| 18.5 | 25 | TBIL | -1 | 5 | OTU119 (Prevotella)                         | 0.036371282  | 0.667395496 | 0 | #FF8E8A | 0 |
| 19.5 | 24 | TBIL | -1 | 5 | OTU5 (Haemophilus)                          | -0.037187186 | 0.660392188 | 0 | #00CCCC | 0 |
| 20.5 | 23 | TBIL | -1 | 5 | OTU171 (Aggregatibacter)                    | 0.013301889  | 0.875153246 | 0 | #FF8E8A | 0 |
| 21.5 | 22 | TBIL | -1 | 5 | OTU39 (Haemophilus)                         | -0.018827176 | 0.824011518 | 0 | #00CCCC | 0 |
| 22.5 | 21 | TBIL | -1 | 5 | OTU20 (Actinobacillus)                      | -0.029838843 | 0.724458377 | 0 | #00CCCC | 0 |
| 23.5 | 20 | TBIL | -1 | 5 | OTU10 (Alloprevotella)                      | -0.059071846 | 0.484982923 | 0 | #00CCCC | 0 |
| 24.5 | 19 | TBIL | -1 | 5 | OTU26 (Prevotella)                          | -0.165527641 | 0.048992413 | 1 | #00CCCC | 1 |
| 25.5 | 18 | TBIL | -1 | 5 | OTU71 (Alloprevotella)                      | 0.019289864  | 0.819759157 | 0 | #FF8E8A | 0 |
| 26.5 | 17 | TBIL | -1 | 5 | OTU46 (g__Absconditabacteriales_)           | 0.007065308  | 0.933493936 | 0 | #FF8E8A | 0 |
| 27.5 | 16 | TBIL | -1 | 5 | OTU9 (Porphyromonas)                        | -0.093656482 | 0.267594084 | 0 | #00CCCC | 0 |
| 28.5 | 15 | TBIL | -1 | 5 | OTU62 (Aggregatibacter)                     | 0.082342439  | 0.329954139 | 0 | #FF8E8A | 0 |
| 29.5 | 14 | TBIL | -1 | 5 | OTU57 (Parvimonas)                          | -0.032923474 | 0.69730108  | 0 | #00CCCC | 0 |
| 30.5 | 13 | TBIL | -1 | 5 | OTU45 (Alloprevotella)                      | 0.053772232  | 0.52505895  | 0 | #FF8E8A | 0 |
| 31.5 | 12 | TBIL | -1 | 5 | OTU67 (Alloprevotella)                      | -0.080990303 | 0.337984258 | 0 | #00CCCC | 0 |
| 32.5 | 11 | TBIL | -1 | 5 | OTU29 (Porphyromonas)                       | -0.012551564 | 0.882143115 | 0 | #00CCCC | 0 |
| 33.5 | 10 | TBIL | -1 | 5 | OTU365 (Fusobacterium)                      | 0.010167907  | 0.904406496 | 0 | #FF8E8A | 0 |
| 34.5 | 9  | TBIL | -1 | 5 | OTU169 (Treponema)                          | 0.054691985  | 0.51798545  | 0 | #FF8E8A | 0 |
| 35.5 | 8  | TBIL | -1 | 5 | OTU42 (g__Absconditabacteriales_)           | 0.0082207    | 0.922649572 | 0 | #FF8E8A | 0 |
| 36.5 | 7  | TBIL | -1 | 5 | OTU380 (Porphyromonas)                      | -0.044121963 | 0.602101563 | 0 | #00CCCC | 0 |
| 37.5 | 6  | TBIL | -1 | 5 | OTU678 (Neisseria)                          | -0.026194987 | 0.756984246 | 0 | #00CCCC | 0 |
| 38.5 | 5  | TBIL | -1 | 5 | OTU75 (Porphyromonas)                       | 0.018652399  | 0.825619146 | 0 | #FF8E8A | 0 |
| 39.5 | 4  | TBIL | -1 | 5 | OTU134 (Prevotella)                         | 0.039354432  | 0.641933324 | 0 | #FF8E8A | 0 |
| 40.5 | 3  | TBIL | -1 | 5 | OTU2 (Fusobacterium)                        | -0.02054778  | 0.808225031 | 0 | #00CCCC | 0 |
| 41.5 | 2  | TBIL | -1 | 5 | OTU523 (Prevotella)                         | -0.077169724 | 0.361338467 | 0 | #00CCCC | 0 |
| 42.5 | 1  | TBIL | -1 | 5 | OTU4 (Prevotella)                           | -0.054147225 | 0.522169112 | 0 | #00CCCC | 0 |
| -0.5 | 44 | CREA | 0  | 1 | OTU599 (Burkholderiales_unclassified)       | 0.111063096  | 0.188225527 | 0 | #FF8E8A | 1 |
| 0.5  | 43 | CREA | 0  | 1 | OTU744 (Leptotrichia)                       | -0.015997465 | 0.850124985 | 0 | #00CCCC | 0 |
| 1.5  | 42 | CREA | 0  | 1 | OTU658 (P5D1-392)                           | 0.122601024  | 0.146074926 | 0 | #FF8E8A | 1 |
| 2.5  | 41 | CREA | 0  | 1 | OTU796 (Rothia)                             | 0.004055637  | 0.961794723 | 0 | #FF8E8A | 0 |
| 3.5  | 40 | CREA | 0  | 1 | OTU748 (Leptotrichia)                       | 0.069190564  | 0.413246194 | 0 | #FF8E8A | 0 |
| 4.5  | 39 | CREA | 0  | 1 | OTU762 (Streptococcus)                      | 0.018631666  | 0.825809905 | 0 | #FF8E8A | 0 |
| 5.5  | 38 | CREA | 0  | 1 | OTU34 (Halomonas)                           | -0.040581072 | 0.631581055 | 0 | #00CCCC | 0 |
| 6.5  | 37 | CREA | 0  | 1 | OTU1 (Streptococcus)                        | 0.022269101  | 0.792508883 | 0 | #FF8E8A | 0 |
| 7.5  | 36 | CREA | 0  | 1 | OTU126<br>([Eubacterium]_ruminantium_group) | -0.075906628 | 0.369274483 | 0 | #00CCCC | 0 |
| 8.5  | 35 | CREA | 0  | 1 | OTU82 (Faecalibacterium)                    | -0.092123725 | 0.275537632 | 0 | #00CCCC | 0 |
| 9.5  | 34 | CREA | 0  | 1 | OTU69 (Fusicatenibacter)                    | -0.12692355  | 0.132274016 | 0 | #00CCCC | 1 |
| 10.5 | 33 | CREA | 0  | 1 | OTU85 (Prevotella)                          | -0.102834536 | 0.223294161 | 0 | #00CCCC | 1 |
| 11.5 | 32 | CREA | 0  | 1 | OTU252 (Prevotella)                         | -0.10541525  | 0.211830907 | 0 | #00CCCC | 1 |
| 12.5 | 31 | CREA | 0  | 1 | OTU129 (Acinetobacter)                      | -0.075779572 | 0.370078661 | 0 | #00CCCC | 0 |
| 13.5 | 30 | CREA | 0  | 1 | OTU31 (Pseudomonas)                         | 0.00445611   | 0.958025444 | 0 | #FF8E8A | 0 |
| 14.5 | 29 | CREA | 0  | 1 | OTU15 (Campylobacter)                       | -0.218778396 | 0.008902643 | 1 | #00CCCC | 2 |
| 15.5 | 28 | CREA | 0  | 1 | OTU87 (Corynebacterium)                     | -0.011386999 | 0.893009763 | 0 | #00CCCC | 0 |
| 16.5 | 27 | CREA | 0  | 1 | OTU114 (Prevotella)                         | 0.073786728  | 0.382832529 | 0 | #FF8E8A | 0 |

|      |    |      |   |   |                                   |              |             |   |         |   |
|------|----|------|---|---|-----------------------------------|--------------|-------------|---|---------|---|
| 17.5 | 26 | CREA | 0 | 1 | OTU172 (Prevotella)               | -0.006142107 | 0.942167863 | 0 | #00CCCC | 0 |
| 18.5 | 25 | CREA | 0 | 1 | OTU119 (Prevotella)               | 0.058961573  | 0.485799773 | 0 | #FF8E8A | 0 |
| 19.5 | 24 | CREA | 0 | 1 | OTU5 (Haemophilus)                | 0.114944192  | 0.173156576 | 0 | #FF8E8A | 1 |
| 20.5 | 23 | CREA | 0 | 1 | OTU171 (Aggregatibacter)          | 0.055510458  | 0.511732118 | 0 | #FF8E8A | 0 |
| 21.5 | 22 | CREA | 0 | 1 | OTU39 (Haemophilus)               | 0.023938271  | 0.777348054 | 0 | #FF8E8A | 0 |
| 22.5 | 21 | CREA | 0 | 1 | OTU20 (Actinobacillus)            | -0.018564721 | 0.826425901 | 0 | #00CCCC | 0 |
| 23.5 | 20 | CREA | 0 | 1 | OTU10 (Alloprevotella)            | -0.030928548 | 0.714823232 | 0 | #00CCCC | 0 |
| 24.5 | 19 | CREA | 0 | 1 | OTU26 (Prevotella)                | -0.022150493 | 0.793589218 | 0 | #00CCCC | 0 |
| 25.5 | 18 | CREA | 0 | 1 | OTU71 (Alloprevotella)            | 0.030117189  | 0.721993074 | 0 | #FF8E8A | 0 |
| 26.5 | 17 | CREA | 0 | 1 | OTU46 (g__Absconditabacteriales_) | 0.011336918  | 0.893477533 | 0 | #FF8E8A | 0 |
| 27.5 | 16 | CREA | 0 | 1 | OTU9 (Porphyromonas)              | 0.136576278  | 0.105079181 | 0 | #FF8E8A | 1 |
| 28.5 | 15 | CREA | 0 | 1 | OTU62 (Aggregatibacter)           | 0.016032775  | 0.84979807  | 0 | #FF8E8A | 0 |
| 29.5 | 14 | CREA | 0 | 1 | OTU57 (Parvimonas)                | 0.079114849  | 0.349325989 | 0 | #FF8E8A | 0 |
| 30.5 | 13 | CREA | 0 | 1 | OTU45 (Alloprevotella)            | 0.044067335  | 0.602551675 | 0 | #FF8E8A | 0 |
| 31.5 | 12 | CREA | 0 | 1 | OTU67 (Alloprevotella)            | -0.004036932 | 0.961970792 | 0 | #00CCCC | 0 |
| 32.5 | 11 | CREA | 0 | 1 | OTU29 (Porphyromonas)             | 0.172853783  | 0.039677024 | 1 | #FF8E8A | 1 |
| 33.5 | 10 | CREA | 0 | 1 | OTU365 (Fusobacterium)            | 0.108303386  | 0.199508185 | 0 | #FF8E8A | 1 |
| 34.5 | 9  | CREA | 0 | 1 | OTU169 (Treponema)                | 0.176658279  | 0.035457913 | 1 | #FF8E8A | 1 |
| 35.5 | 8  | CREA | 0 | 1 | OTU42 (g__Absconditabacteriales_) | -0.031576034 | 0.709119284 | 0 | #00CCCC | 0 |
| 36.5 | 7  | CREA | 0 | 1 | OTU380 (Porphyromonas)            | 0.131062436  | 0.120017744 | 0 | #FF8E8A | 1 |
| 37.5 | 6  | CREA | 0 | 1 | OTU678 (Neisseria)                | 0.011500479  | 0.891949963 | 0 | #FF8E8A | 0 |
| 38.5 | 5  | CREA | 0 | 1 | OTU75 (Porphyromonas)             | 0.152395767  | 0.070211367 | 0 | #FF8E8A | 1 |
| 39.5 | 4  | CREA | 0 | 1 | OTU134 (Prevotella)               | -0.126346378 | 0.134056753 | 0 | #00CCCC | 1 |
| 40.5 | 3  | CREA | 0 | 1 | OTU2 (Fusobacterium)              | 0.110284972  | 0.191358538 | 0 | #FF8E8A | 1 |
| 41.5 | 2  | CREA | 0 | 1 | OTU523 (Prevotella)               | -0.026785396 | 0.751683397 | 0 | #00CCCC | 0 |
| 42.5 | 1  | CREA | 0 | 1 | OTU4 (Prevotella)                 | -0.036980331 | 0.662164972 | 0 | #00CCCC | 0 |

## **Supplementary method**

### **Diagnostic, inclusion, and exclusion criteria**

Diagnostic criteria are based on the “COVID-19 diagnosis and treatment program trial V.5 (or V.6) guidelines’ issued by the National Health Commission of the People’s Republic of China

#### 1. Suspected cases.

Combined with the following comprehensive analysis of epidemiological history and clinical manifestations: any one of the epidemiological history and any two of the clinical manifestations, or no clear epidemiological history and three of the clinical manifestations can be diagnosed as a suspected patient.

##### (1) History of Epidemiology

- 1) Travel history or residence history of Wuhan city and surrounding areas, or other communities with case reports within 14 days before onset.
- 2) A history of contact with a infected person (positive nucleic acid test) within 14 days before onset.
- 3) Have contacted patients with fever or respiratory symptoms from Wuhan city and surrounding areas, or from communities with case reports within 14 days before onset.
- 4) Aggregated onset (2 or more cases of fever and / or respiratory symptoms occurred within 2 weeks in a small area such as home, office, school class, etc.,).

##### (2) Clinical manifestations

- 1) Fever and / or respiratory symptoms.
- 2) With the characteristic image of COVID-19.
- 3) The total number of white blood cells in the early stage of the disease is normal or decreased, and the lymphocyte count is normal or decreased.

#### 2. Confirmed cases.

Suspected cases with one of the following etiological or serological evidence:

- (1) Fluorescence RT-PCR detects the positive of the COVID-19 virus nucleic acid.

(2) Viral gene sequencing finds highly homologous to COVID-19 virus.

3. Cured patients (Convalescent patients).

Meet the following conditions at the same time:

(1) Body temperature returned to normal for more than 3 days.

(2) Respiratory symptoms improved significantly.

(3) Pulmonary imaging showed a significant improvement in acute exudative lesions.

(4) Two consecutive sputum, nasopharyngeal swabs and other respiratory tract specimens with negative nucleic acid test (sampling time needs to be at least 24 hours apart).

All enrolled individuals were checked by a professional dentist to ensure healthy mouth and gums. The inclusion criteria for healthy volunteers referred to our previous study. The exclusion criteria included diabetes, obesity, hypertension, metabolic syndrome, irritable bowel syndrome, nonalcoholic fatty liver disease, coeliac disease, and liver cirrhosis. Individuals who received antibiotics and/or probiotics within 8 weeks before enrolment were also excluded.

### **Enrollment process**

We set two isolation wards in hospital, suspected cases ward and confirmed cases ward. Suspected case ward was used for admitting patients with fever, cough, or other related symptoms, or clinical confirmed COVID-19. On the second day of admission, a professional staff will collect the throat swab specimens for nucleic acid test by PT-PCR. If the nucleic acid detection was positive, patients were immediately transferred to confirmed cases ward. Our investigator would then assess whether the patient meets our enrollment criteria. If so, the patient will be included after signing the informed consent. Patients with exposure to confirmed patients or Wuhan, but without symptoms, were isolated outside the hospital and collected throat swab specimens for nucleic acid detection. If the result of nucleic acid test was positive, patients were admitted to hospital and transferred to confirmed cases ward. Then our

investigator screened and enrolled eligible patients.

Convalescent patients were transferred to the isolation area outside the hospital and observed for 15 days. If the nucleic acid test was still negative during this period, convalescent patients could departure from the isolated region. Our investigator would collect samples from them two days before discharge.

### **PCR amplification**

We used primers targeting the hypervariable V3-V4 region of the 16S rRNA gene to amplify the extracted DNA samples. The forward primer was 5'-ACTCCTACGGGAGGCAGCA-3' and the reverse primer was 5'-GGACTACHVGGGTWTCTAAT-3'. The PCR reaction system including 0.4  $\mu$ L of Fast Pfu polymerase, 2  $\mu$ L of 2.5 mM dNTP (TransGen Biotech, Beijing, China), 4  $\mu$ L of 5 $\times$ Fast Pfu buffer, 0.8  $\mu$ L of each primer (5  $\mu$ M), and 10 ng of template DNA. Each sample were carried out four reactions using a PCR machine (ABI GeneAmp 9700): 95  $^{\circ}$ C for 2 minutes, 95  $^{\circ}$ C for 30 s, 55  $^{\circ}$ C for 30 s, 72  $^{\circ}$ C for 30 s, repeating 30 cycles and finally at 72  $^{\circ}$ C for 5 minutes. Agarose gel (Axygen Biosciences, Union City, CA) was used to separate, extract and purify the PCR products, and the products were quantified using a fluorescence assay kit (Quant-iT PicoGreen, Invitrogen).

### **Sequence data process**

We distributed the filtered readings based on the sample-specific barcode to different samples, and then trimmed the barcode and primers. Process the amplified readings through the following steps: (i) overlap pair end sequenced reads of each library using FLASH v1.2.10 software. (ii) use the customization of each program to perform more specific quality control on overlapping reads generated by FLASH 1) Ambiguous bases (N); 2) the mismatch rate in the overlap region was no more than 0.05; 3) mismatches in barcode and primer regions were not approved; (iii) de-multiplexed and assigned reads into different samples according to barcodes; (iv) detect and remove the chimeric sequences by UCHIME version 4.2.40 (version microbiome util-r20110519, <http://drive5.com/uchime/gold.fa>) to match Operational Taxonomy

Units (OTUs).

### **Construction of probability of disease (POD)**

We used the abundance profile of the optimal OTUs markers in the discovery cohort to conduct fivefold cross-validation on a random forest model (R 3.4.1, randomForest 4.6-12 package). Then we acquired the cross-validation error curve through five trials of the fivefold cross-validation. The point with the minimum cross-validation error was defined as the cut-off point through the minimum error plus the standard deviation (SD). The sets of OTU markers with the error less than the cut-off value were listed and the set with the smallest number of OTUs were defined as the optimal set. We used the optimal set of OTUs to calculate POD index in the discovery and validation cohort. The constructed models were assessed using the receiver operating characteristic (ROC) curve (R 3.3.0, pROC package), and the ROC effect was showed using AUC.
